# Supplementary material for: A Candidate-Gene Approach Identifies Novel Associations Between Common Variants in/Near Syndromic Obesity Genes and BMI in Pediatric and Adult European Populations
Source: Oxford University Press journal article supplement (doi:10.2337/db18-0986), 2019-01-28
Supplement: db180986supplementarydata2.xlsx [file db180986supplementarydata2.xlsx]

## Sheet: Sheet1
Supplementary Table 1. Genes previously identified in a systematic review of obesity syndromes. See Kaur et al., Obes Rev, 2017 for a detailed list. *The gene has not been replicated or confirmed by a second independent study
Name(s) of the syndrome/gene and OMIM number	Likely causal gene/chromosomal area	Examples of genetic defects	Reference(s)
5p13 microduplication syndrome	NIPBL	Microduplications	Oexle et al., Eur J Med Genet, 2011; Novara et al., Eur J Med Genet, 2013
Albright hereditary osteodystrophy/ Pseudohypoparathyroidism type Ia	GNAS1/GNAS	Missense, frameshift, nonsense, splice site, deletions, insertions	Rao et al., Genomics, 1991; Thiele et al., Mol Genet Genomic Med, 2015
Alström syndrome (OMIM #203800)	ALMS1	Frameshift, nonsense, missense	Hearn et al., Nat Genet, 2002; Piñeiro-Gallego et al., Mol Vis, 2012
Angelman syndrome (OMIM #105830)	UBE3A	Loss of function mutations: frameshift, premature termination of translation, deletions	Kishino et al., Nat Genet, 1997
Bardet-biedl syndrome/ Laurence-Moon-Bardet-Biedl syndrome (OMIM #209900)	BBS1	Missense, nonsense, splice-site and frame-shift mutations	Mykytyn et al., Nat Genet, 2002
	BBS2	Missense, nonsense, frameshift, splice-site, duplications	Nishimura et al., Hum Mol Genet, 2001; Fattahi et al., J Hum Genet, 2014
	BBS3/ARL6	Stop mutations, null mutations, deletions	Chiang et al., Am J Hum Genet, 2004; Fan et al., Nat Genet, 2004; Chen et al., Invest Ophthalmol Vis Sci, 2011; Pereiro et al., Mol Vis, 2010
	BBS4	Deletions, splice-site, nonsense, missense	Mykytyn et al., Nat Genet, 2001; Fattahi et al., J Hum Genet, 2014; Ece Solmaz et al., Eur J Med Genet, 2015
	BBS5	Missense, frameshift mutations, deletions, splice-site mutations	Li et al., Cell, 2004; Hjortshøj et al., Am J Med Genet Am, 2008; Chen et al., Invest Ophthalmol Vis Sci, 2011
	BBS6/MKKS	Missense, frameshift mutations	Katsanis et al., Nat Genet, 2000; Slavotinek et al., Nat Genet, 2000
	BBS7	Frameshift, missense, deletion, nonsense	Badano et al, Am J Hum Genet, 2003; Fattahi et al., J Hum Genet, 2014; Ece Solmaz et al., Eur J Med Genet, 2015
	BBS8/TTC8	Splice-site, insertion-deletion, missense	Ansley et al., Nature, 2003; Chen et al., Invest Ophthalmol Vis Sci, 2011; Smaoui et al., Invest Ophthalmol Vis Sci, 2006
	BBS9/PTHB1	Frameshift, splice-site, deletion	Nishimura et al., Am J Hum Genet, 2005; Fattahi et al., J Hum Genet, 2014; Khan et al., BMC Med Genet, 2016
	BBS10	Missense, nonsense, frameshift, deletion, splice-site	Stoetzel et al. Nat Genet, 2006; Khan et al., Gene, 2013; Billingsley et al., Ophthalmic Genet, 2011
	BBS11/TRIM32	Frameshift, missense mutations	Chiang et al., Proc Natl Acad Sci U S A, 2006; Cossée et al., Neuromuscul Disord, 2009
	BBS12	Nonsense, deletion, missense, frameshift	Stoetzel et al., Am J Hum Genet, 2007
	BBS13/MKS1	Missense	Leitch et al., Nat Genet, 2008
	BBS14/CEP290	Nonsense (loss of function)	Leitch et al., Nat Genet, 2008
	BBS15/WDPCP	Splice-site	Cui et al., PLoS Biol, 2013
	BBS16/SDCCAG8/NPHP10*	Nonsense, splice-site	Schaefer et al., Mol Syndromol, 2011
	BBS17/LZTFL1*	Missense, nonsense	Marion et al., J Med Genet, 2012
	BBS18/BBIP1	Stop mutations (null)	Scheidecker et al., J Med Genet, 2014
	BBS19/IFT27	Splice-site (loss of function)	Aldahmesh et al., Hum Mol Genet, 2014
	BBS20/IFT172	Splice-site mutations	Schaefer et al., J Hum Genet, 2016
	BBS21/ C8ORF37	Missense mutations	Khan et al., Ophthalmic Genet, 2016
Carpenter syndrome/ Acrocephalopolysyndactyly type II (OMIM #201000)	RAB23	Truncating, missense, nonsense	Jenkins et al., Am J Hum Genet, 2007; Cohen et al., Am J Med Genet, 1987
CHOPS syndrome	AFF4*	Loss of function: deletions, duplications, missense, or splice-site mutations	Izumi et al., Nat Genet, 2015
Cohen syndrome (OMIM #216550)	VPS13B/COH1	CNV changes, deletions, missense, nonsense, point mutations, duplications	Kolehmainen et al., Am J Hum Genet, 2003; Seifert et al., J Med Genet, 2006
Cornelia de Lange syndrome/Brachmann-de Lange-syndrome (OMIM #122470)	NIPBL	Frameshift, missense, nonsense, splice-site mutations, truncating	Tonkin et al., Nat Genet, 2004; Deardorff et al., Nature, 2012; Gillis et al., Am J Hum Genet, 2004
	RAD21	Loss of function, missense	Deardorff et al., Nature, 2012
	SMC3	Deletion	Deardorff et al., Am J Hum Genet, 2007
Kabuki syndrome/ Niikawa-Kuroki syndrome (OMIM #147920)	KMT2D/ MLL2/ ALR/ KABUK1	Nonsense substitution, frameshift, deletion	Ng et al., Nat Genet, 2010
Kallmann syndrome/ hypogonadotropic hypogonadism with anosmia (OMIM #308700)	FGFR1	Loss of function mutations: nonsense, frameshift, splice-site, missense	Dodé et al., Nat Genet, 2003
	PROK2	Point mutations: missense, frameshift, single nucleotide substitution	Dodé et al., PLoS Genet, 2006
	PROKR2	Point mutations: frameshift, missense	Dodé et al., PLoS Genet, 2006
	SOX10	Loss of function: missense	Pingault et al., Am J Hum Genet, 2013; Suzuki et al., Horm Res Paediatr, 2015
Kleefstra syndrome/ 9q34.3 deletion syndrome	EHMT1	Deletions, frameshift, nonsense, de novo mutations	Kleefstra et al., Am J Hum Genet, 2006; Cormier-Daire et al., J Med Genet, 2003; Neas et al., Am J Med Genet A, 2005
Laron syndrome/ Growth Hormone Receptor Deficiency (OMIM #262500)	GHR	Nonsense, splice-junction, frameshift mutations	Guevara-Aguirre et al., Acta Paediatr Scand Suppl, 1991; Berg et al., Am J Hum Genet, 1993
MORM (mental retardation, truncal obesity, retinal dystrophy and micropenis) syndrome	INPP5E*	Loss of function mutations: nonsense	Hampshire et al., Eur J Hum Genet, 2006; Jacoby et al., Nat Genet, 2009
Prader-Willi syndrome/ Prader-Labhart-Willi syndrome (OMIM #176270)	MKRN3/ ZNF127	Imprinting defects	Jong et al., Hum Mol Genet, 1999
	MAGEL2	Truncating mutations of paternal allele	Schaaf et al., Nat Genet, 2013
	NDN	Deletions	MacDonald et al., Hum Mol Genet, 1997
	NPAP1/ C15orf2	Loss of function	Färber et al., Genomics, 2000
	SNURF-SNRPN	Loss of function of paternal copy	Sahoo et al., Nat Genet, 2008
Prader-Willi Like Phenotype	SIM1	Loss of function mutations- missense mutations	Villa et al., Am J Med Genet, 1995; Bonaglia et al., Eur J Hum Genet, 2008; Bonnefond et al., J Clin Invest, 2013; Ramachandrappa et al., J Clin Invest, 2013
	MRAP2	Loss of function mutations	Geets et al., Mol Genet Metab, 2016
Proximal 16p11.2 deletion syndrome	SH2B1*	Deletions	Bachmann-Gagescu et al., Genet Med, 2010; Yu et al., J Genet Genomics, 2011
	KCTD13	Deletions	Golzio et al., Nature, 2012
Rubinstein-Taybi syndrome	CREBBP	Nonsense, frameshift, missense, splice-site, deletions, point mutations	Stevens et al., Am J Med Genet A, 2011; Petrij et al., Nature, 1995
	EP300	Frameshift mutations	Woods et al., Am J Med Genet A, 2013
Smith-Magenis syndrome (OMIM #182290)	RAI1	Haploinsufficiency: deletions, frameshift, nonsense	Slager et al., Nat Genet, 2003; Dubourg et al., Mol Syndromol, 2014
WAGRO	BDNF	Deletions	Han et al., N Engl J Med, 2008
Unnamed 1	NTRK2*	Missense mutation	Yeo et al., Nat Neurosci, 2004
Unnamed 4	BDNF	Chromosomal inversion, microdeletions	Gray et al., Diabetes, 2006; Shinawi et al., Am J Med Genet A, 2011
Unnamed 5	SH2B1	Loss of function mutations: Frameshift, missense mutations	Doche et al., J Clin Invest, 2012
Unnamed 6	TUB*	Loss of function: frameshift	Borman et al., Hum Mutat, 2014
Unnamed 7	CHD2 and RGMA*	Microdeletions	Courage et al., Eur J Med Genet, 2014
