# Supplementary material for: A Candidate-Gene Approach Identifies Novel Associations Between Common Variants in/Near Syndromic Obesity Genes and BMI in Pediatric and Adult European Populations
Source: Oxford University Press journal article supplement (doi:10.2337/db18-0986), 2019-01-28
Supplement: db180986supplementarydata3.xlsx [file db180986supplementarydata3.xlsx]

## Sheet: SNPs_stats
Supplementary Table 2. Summary statistics of all SNPs analyzed in single-marker analysis. Significant associations (P<2.80×10-6) are highlighted in grey. Alleles (effect/other), effect allele frequency (EAF), beta (β), standard error (SE), P values, and number of observations (N) are reported. SNP positions are reported according to Build 37.
SNP	Chr:position	Gene	Alleles	EAF	β	SE	P	N
rs6265	11:27679916	BDNF	T/C	0.1951	-0.0412	0.0021	1e-86	795458
rs2049045	11:27694241	BDNF	C/G	0.1842	-0.0405	0.0021	1.9e-83	793584
rs11030104	11:27684517	BDNF	A/G	0.7891	0.0393	0.002	2e-83	794765
rs16917237	11:27702383	BDNF	T/G	0.2105	-0.0393	0.002	2.7e-83	787789
rs7103411	11:27700125	BDNF	T/C	0.7841	0.0385	0.002	1.6e-82	795623
rs2030323	11:27728539	BDNF	A/C	0.2149	-0.0383	0.002	8.4e-82	795269
rs10501087	11:27670108	BDNF	T/C	0.791	0.0384	0.002	2.9e-79	795220
rs925947	11:27667367	BDNF	T/G	0.209	-0.0385	0.0021	1.1e-78	774560
rs4074134	11:27647285	BDNF	T/C	0.2089	-0.0377	0.002	5.8e-78	795578
rs4923457	11:27648580	BDNF	A/T	0.7913	0.0377	0.002	7.4e-78	795171
rs4923460	11:27656789	BDNF	T/G	0.2088	-0.0376	0.002	1.9e-77	794867
rs4923461	11:27656910	BDNF	A/G	0.7912	0.0376	0.002	3.4e-77	795259
rs10767664	11:27725986	BDNF	A/T	0.785	0.0385	0.0021	5.5e-77	731192
rs988748	11:27724745	BDNF	C/G	0.2187	-0.0379	0.0021	1.6e-75	739603
rs1488830	11:27636885	BDNF	T/C	0.7899	0.0373	0.002	5.5e-75	790842
rs879048	11:27638934	BDNF	A/C	0.79	0.0369	0.002	8e-75	795201
rs6484320	11:27703188	BDNF	A/T	0.7849	0.0382	0.0021	2e-72	692257
rs11030084	11:27643725	BDNF	T/C	0.192	-0.0392	0.0022	4.8e-70	692253
rs12419948	11:27666984	BDNF	A/T	0.209	-0.038	0.0022	1.1e-69	692275
rs1013402	11:27712381	BDNF	A/G	0.6829	-0.0295	0.0018	1.3e-63	793174
rs1401635	11:27693991	BDNF	C/G	0.3154	0.0295	0.0018	1.6e-63	788991
rs11030108	11:27695464	BDNF	A/G	0.3153	0.0294	0.0018	3.5e-63	794680
rs1519480	11:27675712	BDNF	T/C	0.6813	-0.0292	0.0018	1.4e-62	793242
rs10767658	11:27672252	BDNF	C/G	0.3085	0.0293	0.0018	1.6e-62	781752
rs11030119	11:27728102	BDNF	A/G	0.3014	0.0295	0.0018	1.8e-62	793224
rs7127507	11:27714884	BDNF	T/C	0.6749	-0.0287	0.0017	3.1e-62	793067
rs962369	11:27734420	BDNF	T/C	0.6988	-0.0296	0.0018	7.6e-62	792827
rs925946	11:27667202	BDNF	T/G	0.3088	0.029	0.0018	2.2e-61	795513
rs7124442	11:27677041	BDNF	T/C	0.6832	-0.0286	0.0017	4.6e-61	793435
rs7498665	16:28883241	SH2B1	A/G	0.5962	-0.0271	0.0017	5.6e-60	790299
rs3888190	16:28889486	SH2B1	A/C	0.4038	0.0271	0.0017	9.2e-60	794486
rs11030121	11:27736207	BDNF	T/C	0.3103	0.0287	0.0018	1.2e-59	790200
rs4788101	16:28867804	SH2B1	T/C	0.4038	0.027	0.0017	1.4e-59	795541
rs8055982	16:28881202	SH2B1	A/C	0.5962	-0.027	0.0017	1.6e-59	795565
rs4788102	16:28873398	SH2B1	A/G	0.4039	0.027	0.0017	2.7e-59	795549
rs4788099	16:28855727	SH2B1	A/G	0.5963	-0.0269	0.0017	4.8e-59	795572
rs7187776	16:28857645	SH2B1	A/G	0.5927	-0.0265	0.0016	1.4e-58	792563
rs8049439	16:28837515	SH2B1	T/C	0.592	-0.0265	0.0016	1.5e-58	795590
rs8061590	16:28895130	SH2B1	A/G	0.5969	-0.0268	0.0017	1.8e-58	793970
rs7359397	16:28885659	SH2B1	T/C	0.4021	0.0267	0.0017	4.9e-58	795625
rs2008514	16:28825605	SH2B1	A/G	0.407	0.0268	0.0017	9.1e-58	787726
rs12325113	16:28848668	SH2B1	T/C	0.5975	-0.0265	0.0017	1.7e-57	795568
rs12443881	16:28841777	SH2B1	T/C	0.4023	0.0265	0.0017	1.9e-57	795596
rs8055138	16:28891465	SH2B1	T/C	0.4038	0.0269	0.0017	7.2e-57	737455
rs10835211	11:27701365	BDNF	A/G	0.261	0.0289	0.0019	2e-54	795539
rs11030107	11:27694835	BDNF	A/G	0.7422	-0.0289	0.0019	2.3e-54	794663
rs11030102	11:27681596	BDNF	C/G	0.7422	-0.0288	0.0019	3.2e-54	794512
rs1013442	11:27578946	BDNF	A/T	0.7606	0.0294	0.0019	1.6e-52	795301
rs10734394	11:27628412	BDNF	A/G	0.7588	0.0292	0.0019	1.8e-52	792798
rs10742178	11:27613718	BDNF	A/G	0.2408	-0.0291	0.0019	1.8e-52	795301
rs10767649	11:27613818	BDNF	T/G	0.7582	0.0291	0.0019	2.5e-52	795342
rs17309874	11:27667236	BDNF	A/G	0.2565	0.0283	0.0019	5.4e-52	792413
rs4923455	11:27594146	BDNF	A/G	0.2405	-0.0288	0.0019	8.9e-52	795469
rs7124596	11:27594558	BDNF	A/G	0.2405	-0.0288	0.0019	1.7e-51	795542
rs1906654	11:27574408	BDNF	A/G	0.2404	-0.0287	0.0019	5.3e-51	795589
rs9931989	16:28906084	SH2B1	C/G	0.641	-0.0257	0.0017	3.9e-50	793807
rs4788100	16:28864673	SH2B1	T/C	0.5971	-0.026	0.0018	1.7e-49	692604
rs7205323	16:28865892	SH2B1	T/C	0.4031	0.0259	0.0018	2e-49	692478
rs8062405	16:28837906	SH2B1	A/G	0.5961	-0.0257	0.0017	3.8e-49	692503
rs12325278	16:28848818	SH2B1	A/G	0.5963	-0.0258	0.0018	4.3e-49	692435
rs1488829	11:27551979	BDNF	C/G	0.2418	-0.0282	0.0019	1.3e-48	795448
rs6565259	16:28898793	SH2B1	T/C	0.6297	-0.025	0.0017	2.4e-48	785070
rs7187333	16:28865916	SH2B1	A/G	0.4014	0.0256	0.0018	2.6e-48	692470
rs10742179	11:27650524	BDNF	A/G	0.2677	-0.0269	0.0018	6.1e-48	794964
rs901925	11:27542469	BDNF	T/C	0.7588	0.028	0.0019	8e-48	794479
rs6484313	11:27541800	BDNF	T/C	0.7588	0.028	0.0019	8.8e-48	794505
rs12928404	16:28847246	SH2B1	T/C	0.5865	-0.0254	0.0018	9.1e-48	691290
rs6484312	11:27541623	BDNF	A/T	0.2412	-0.0279	0.0019	1e-47	783848
rs2101467	11:27544359	BDNF	A/G	0.2412	-0.0279	0.0019	1.1e-47	794321
rs4923456	11:27609127	BDNF	T/C	0.7594	0.0294	0.002	1.8e-47	692357
rs9972768	16:28861734	SH2B1	A/C	0.5963	-0.0266	0.0018	2.5e-47	579697
rs9972693	16:28859802	SH2B1	A/G	0.5963	-0.0267	0.0019	8.8e-47	558456
rs11646653	16:28922149	SH2B1	T/C	0.6606	-0.0249	0.0017	1.4e-46	794902
rs12444171	16:28845251	SH2B1	A/G	0.4036	0.0266	0.0019	1.7e-46	559349
rs7189927	16:28913787	SH2B1	T/C	0.3586	0.0251	0.0017	1.8e-46	757896
rs7116850	11:27645530	BDNF	A/G	0.729	0.0263	0.0018	2.4e-46	795214
rs1304100	11:27571603	BDNF	A/G	0.7565	0.029	0.002	3.2e-46	691594
rs10835195	11:27577231	BDNF	A/C	0.7596	0.0288	0.002	1e-45	691858
rs4451951	16:28836205	SH2B1	T/C	0.5951	-0.0263	0.0019	1.2e-45	556217
rs988712	11:27563382	BDNF	T/G	0.2409	-0.0285	0.002	1e-44	692370
rs3924376	16:28925978	SH2B1	T/C	0.3364	0.0246	0.0018	2.1e-44	791296
rs11030086	11:27646157	BDNF	A/T	0.2804	-0.0255	0.0018	2.3e-44	793554
rs1114029	11:27595981	BDNF	T/C	0.2405	-0.0285	0.002	3e-44	639423
rs17309930	11:27748493	BDNF	A/C	0.2028	0.0281	0.002	6.3e-44	791415
rs12273363	11:27744859	BDNF	T/C	0.7962	-0.0281	0.002	6.9e-44	792066
rs12577586	11:27600435	BDNF	T/C	0.7679	-0.0266	0.0019	8.1e-44	795052
rs12288512	11:27747671	BDNF	A/G	0.2028	0.0281	0.002	8.6e-44	794179
rs10835201	11:27618265	BDNF	A/G	0.767	-0.0267	0.0019	2.3e-43	794404
rs12361806	11:27619569	BDNF	A/G	0.2295	0.0267	0.0019	3.5e-43	794214
rs11030075	11:27627296	BDNF	C/G	0.7686	-0.0266	0.0019	4.4e-43	793636
rs10835197	11:27607543	BDNF	T/C	0.229	0.0265	0.0019	1e-42	795129
rs7481311	11:27583129	BDNF	T/C	0.229	0.0262	0.0019	5.9e-42	795364
rs6484311	11:27531764	BDNF	A/G	0.7735	-0.0264	0.0019	6.6e-42	793842
rs6484308	11:27521802	BDNF	T/G	0.2264	0.0263	0.0019	9.6e-42	794133
rs10767646	11:27559744	BDNF	T/C	0.2306	0.0262	0.0019	1.2e-41	794518
rs7127239	11:27547379	BDNF	A/C	0.228	0.0263	0.0019	1.5e-41	794011
rs1038660	11:27549392	BDNF	A/C	0.2264	0.0263	0.0019	1.8e-41	794033
rs6484314	11:27550199	BDNF	A/G	0.2264	0.0263	0.0019	1.8e-41	794048
rs12790913	11:27511998	BDNF	A/G	0.2382	0.0259	0.0019	1.9e-41	789575
rs7107410	11:27551388	BDNF	T/C	0.2277	0.0262	0.0019	2.3e-41	794484
rs11030067	11:27620932	BDNF	T/C	0.2288	0.0275	0.002	4.2e-41	691224
rs4922787	11:27507902	BDNF	T/G	0.7632	-0.0259	0.0019	4.3e-41	787267
rs3814883	16:29994922	KCTD13	T/C	0.4764	0.0232	0.0017	1.1e-40	685519
rs2904880	16:28944396	SH2B1	C/G	0.3292	0.024	0.0018	2.9e-40	737324
rs12786130	11:27505954	BDNF	T/C	0.7634	-0.0256	0.0019	3.7e-40	787393
rs10835190	11:27544647	BDNF	T/C	0.7653	-0.0253	0.0019	4e-40	793871
rs1038659	11:27549330	BDNF	T/G	0.2368	0.0252	0.0019	6.4e-40	793925
rs7188071	16:28917644	SH2B1	T/C	0.3582	0.0252	0.0019	7.6e-40	558699
rs6416056	11:27646745	BDNF	A/G	0.7285	0.0257	0.0019	1e-39	692308
rs10767647	11:27567392	BDNF	A/G	0.7717	-0.027	0.0021	1.7e-39	690708
rs4922788	11:27611029	BDNF	A/G	0.2406	-0.0288	0.0022	3.2e-39	536331
rs7184597	16:28921809	SH2B1	T/C	0.338	0.0243	0.0019	4.9e-39	679834
rs10499	16:28915527	SH2B1	A/G	0.643	-0.0247	0.0019	8.3e-39	576859
rs879620	16:4015729	CREBBP	T/C	0.6179	0.0231	0.0018	5.3e-38	688377
rs6484306	11:27517670	BDNF	T/C	0.2299	0.0251	0.002	1.8e-37	790712
rs11649612	16:29946670	KCTD13	T/C	0.4595	-0.022	0.0017	2e-37	692025
rs4787486	16:29977562	KCTD13	A/T	0.5476	-0.022	0.0017	2.4e-37	691412
rs2278557	16:30093779	KCTD13	C/G	0.6006	-0.0224	0.0018	2.8e-37	692211
rs6565173	16:29974167	KCTD13	A/G	0.4519	0.022	0.0017	3.1e-37	691469
rs11642612	16:30030195	KCTD13	A/C	0.6025	-0.0224	0.0018	3.4e-37	691850
rs12716974	16:29944832	KCTD13	A/G	0.5405	0.022	0.0017	3.4e-37	692535
rs7204797	16:29968015	KCTD13	T/C	0.4524	0.0219	0.0017	3.9e-37	691515
rs12325539	16:30033633	KCTD13	T/C	0.6021	-0.0223	0.0018	4.2e-37	692480
rs11150581	16:30030699	KCTD13	T/C	0.6024	-0.0223	0.0018	5.2e-37	691895
rs11150580	16:30014564	KCTD13	T/C	0.4514	0.0226	0.0018	5.8e-37	637252
rs4788196	16:29967434	KCTD13	A/G	0.5476	-0.0219	0.0017	6e-37	691522
rs11642740	16:30060655	KCTD13	A/G	0.6023	-0.0223	0.0018	8.2e-37	690384
rs12444978	16:29924422	KCTD13	A/T	0.4618	-0.0218	0.0017	9.6e-37	692475
rs11901	16:29984070	KCTD13	C/G	0.5482	-0.0217	0.0017	1.7e-36	691805
rs3935873	16:30018500	KCTD13	T/C	0.4515	0.0217	0.0017	1.9e-36	691646
rs4788209	16:30013266	KCTD13	T/C	0.4512	0.0218	0.0017	2.2e-36	691679
rs3814880	16:30017895	KCTD13	T/C	0.5481	-0.0217	0.0017	2.3e-36	691894
rs4407079	16:29931899	KCTD13	A/G	0.5385	0.0217	0.0017	2.4e-36	692449
rs4788204	16:29995218	KCTD13	A/G	0.4526	0.0217	0.0017	2.5e-36	692200
rs4318227	16:29984839	KCTD13	C/G	0.5482	-0.0216	0.0017	2.7e-36	692365
rs4609871	16:29932064	KCTD13	T/C	0.5391	0.0217	0.0017	2.7e-36	692522
rs3814881	16:30000901	KCTD13	A/G	0.4518	0.0216	0.0017	3e-36	691928
rs4283241	16:29988349	KCTD13	A/G	0.4522	0.0216	0.0017	3.1e-36	692437
rs11150577	16:29986525	KCTD13	A/G	0.4518	0.0216	0.0017	3.6e-36	692494
rs9925915	16:29993686	KCTD13	C/G	0.4522	0.0216	0.0017	3.8e-36	692501
rs4787489	16:29995880	KCTD13	A/G	0.4516	0.0216	0.0017	4.7e-36	692242
rs9924686	16:30003076	KCTD13	A/G	0.4518	0.0216	0.0017	5.3e-36	692366
rs7187575	16:28990101	SH2B1	T/C	0.6915	-0.0225	0.0018	6.3e-36	787384
rs8045689	16:28988269	SH2B1	T/C	0.6907	-0.0224	0.0018	6.9e-36	787258
rs6565300	16:28993049	SH2B1	A/C	0.3083	0.0224	0.0018	7.3e-36	784406
rs3814884	16:29994736	KCTD13	A/T	0.4516	0.0216	0.0017	8.1e-36	692150
rs4583255	16:29988941	KCTD13	A/G	0.5483	-0.0215	0.0017	1.2e-35	692036
rs2531995	16:4013467	CREBBP	T/C	0.6217	0.0222	0.0018	2e-35	692575
rs4072402	16:28937259	SH2B1	T/C	0.3389	0.0238	0.0019	7.9e-35	556003
rs11030024	11:27508681	BDNF	T/C	0.2116	-0.0248	0.002	9.3e-35	788692
rs11823126	11:27533901	BDNF	A/G	0.7858	0.0245	0.002	1.7e-34	792186
rs12716973	16:29937652	KCTD13	A/G	0.5435	0.021	0.0017	3.7e-34	692129
rs12716972	16:29936654	KCTD13	A/G	0.4567	-0.0209	0.0017	1.2e-33	692460
rs11030014	11:27480827	BDNF	T/C	0.7941	0.0244	0.002	1.7e-33	791633
rs6484307	11:27521743	BDNF	A/G	0.2137	-0.0241	0.002	2.6e-33	794154
rs11030030	11:27512737	BDNF	A/G	0.213	-0.024	0.002	4.9e-33	792892
rs11030029	11:27512727	BDNF	A/G	0.214	-0.024	0.002	5.5e-33	792900
rs7125904	11:27543003	BDNF	T/G	0.2264	0.0258	0.0022	6.4e-33	581557
rs11030012	11:27476936	BDNF	A/C	0.7943	0.0243	0.002	1.2e-32	780785
rs7140	16:28995757	SH2B1	A/C	0.6921	-0.0227	0.0019	1.3e-32	683580
rs7192056	16:28981511	SH2B1	C/G	0.6915	-0.0225	0.0019	1.9e-32	686420
rs12807253	11:27628269	BDNF	A/G	0.09775	-0.0353	0.003	2.2e-32	765699
rs7500321	16:28977020	SH2B1	A/G	0.6903	-0.0224	0.0019	8.5e-32	678368
rs9929088	16:29001460	SH2B1	A/C	0.3092	0.0226	0.002	4e-31	580903
rs11030026	11:27510830	BDNF	A/G	0.1608	0.0265	0.0023	3.4e-30	748090
rs12448482	16:28838073	SH2B1	A/G	0.3395	-0.0197	0.0018	5.2e-29	767054
rs7498491	16:28844068	SH2B1	A/T	0.6565	0.0192	0.0017	1e-28	793260
rs2071342	16:28915433	SH2B1	A/C	0.6489	0.0193	0.0018	2.5e-27	716719
rs4787491	16:30015337	KCTD13	A/G	0.4636	-0.0177	0.0017	4.2e-26	739894
rs11030066	11:27618490	BDNF	T/C	0.1418	0.0251	0.0024	1.1e-25	782011
rs3922668	16:28992646	SH2B1	A/G	0.3599	-0.0178	0.0017	1.2e-25	793312
rs4788199	16:29970857	KCTD13	C/G	0.4759	-0.018	0.0017	2.1e-25	684897
rs11150675	16:28980531	SH2B1	A/G	0.3505	-0.0179	0.0017	2.1e-25	793549
rs7164727	15:73093991	BBS4	T/C	0.681	0.0182	0.0017	3.3e-25	791156
rs4077410	16:29998200	KCTD13	A/G	0.4751	-0.0184	0.0018	3.6e-25	638001
rs12596543	16:30029135	KCTD13	A/G	0.5308	-0.0179	0.0017	4.3e-25	691462
rs8030477	15:73085815	BBS4	T/C	0.6805	0.0181	0.0017	4.4e-25	790159
rs9928448	16:30072530	KCTD13	T/C	0.5296	-0.0179	0.0017	5.2e-25	692261
rs7191849	16:30023157	KCTD13	T/C	0.5305	-0.0179	0.0017	5.6e-25	692043
rs3814878	16:30041966	KCTD13	A/G	0.5304	-0.0177	0.0017	1.2e-24	692586
rs4787488	16:29995803	KCTD13	A/C	0.4753	-0.0176	0.0017	1.2e-24	692257
rs4788215	16:30047930	KCTD13	A/G	0.4688	0.0177	0.0017	1.3e-24	692375
rs11649149	16:30008644	KCTD13	T/C	0.5246	0.0176	0.0017	1.4e-24	692031
rs7201518	16:30082508	KCTD13	T/G	0.4787	0.0176	0.0017	1.8e-24	691771
rs4788212	16:30034469	KCTD13	T/G	0.531	-0.0176	0.0017	2.6e-24	692460
rs4788213	16:30034524	KCTD13	T/C	0.531	-0.0176	0.0017	3e-24	692201
rs8054507	16:30046042	KCTD13	A/G	0.4688	0.0176	0.0017	3e-24	692232
rs4548895	16:29923510	KCTD13	A/G	0.6076	0.0183	0.0018	3.9e-24	683393
rs2289292	16:30097630	KCTD13	T/C	0.3477	-0.0188	0.0019	4.6e-24	687064
rs8060511	16:30101596	KCTD13	A/C	0.4785	0.0179	0.0018	8.9e-24	637582
rs11647753	16:29928115	KCTD13	A/G	0.3817	-0.0178	0.0018	9.6e-24	690444
rs12444415	16:30118345	KCTD13	T/C	0.5234	-0.0175	0.0018	1.5e-23	681926
rs3809624	16:30102802	KCTD13	T/C	0.6635	0.0185	0.0019	2.4e-23	689714
rs8027181	15:73088869	BBS4	A/T	0.3195	-0.0183	0.0019	4.9e-23	688732
rs4777542	15:73082366	BBS4	T/C	0.3165	-0.0183	0.0019	8.9e-23	681946
rs2444217	16:4038387	CREBBP	A/G	0.5695	0.0168	0.0017	1.6e-22	725181
rs11030016	11:27487992	BDNF	T/C	0.7357	0.0176	0.0019	2.5e-21	789579
rs9783783	16:30078492	KCTD13	C/G	0.5015	0.0164	0.0017	7.3e-21	688659
rs9937676	16:28969480	SH2B1	A/G	0.6386	0.0168	0.0018	1e-20	689918
rs12439200	15:73086731	BBS4	A/G	0.2271	-0.0189	0.0021	3.3e-20	689092
rs11642638	16:28984945	SH2B1	A/C	0.6513	0.0166	0.0018	4.6e-20	691210
rs4776614	15:73082468	BBS4	C/G	0.3166	-0.0184	0.002	4.8e-20	525219
rs8033073	15:73051093	BBS4	A/G	0.6427	0.0163	0.0018	6.3e-20	691101
rs10459647	15:73035241	BBS4	T/C	0.3561	-0.0163	0.0018	7.2e-20	691064
rs4777541	15:73082240	BBS4	T/C	0.7757	0.0188	0.0021	7.3e-20	688603
rs12448257	16:3599655	CREBBP	A/G	0.218	0.0184	0.002	8.1e-20	779628
rs8025333	15:73025121	BBS4	A/G	0.3565	-0.0161	0.0018	1.4e-19	691760
rs9460	15:73044575	BBS4	A/G	0.642	0.0163	0.0018	1.5e-19	690067
rs8024986	15:73024868	BBS4	T/C	0.6397	0.0161	0.0018	1.7e-19	692489
rs2277598	15:73027478	BBS4	T/C	0.3559	-0.0161	0.0018	2.2e-19	692591
rs2304597	15:73052431	BBS4	A/G	0.356	-0.0162	0.0018	2.2e-19	691145
rs2238436	16:4025385	CREBBP	T/G	0.2494	-0.0181	0.002	4.5e-19	676135
rs8033580	15:72994968	BBS4	A/C	0.6448	0.0161	0.0018	5e-19	690131
rs7167076	15:73028873	BBS4	A/G	0.3566	-0.0159	0.0018	5.3e-19	690862
rs730180	15:73007893	BBS4	A/G	0.7886	0.0176	0.002	5.4e-19	792607
rs11631352	15:73086473	BBS4	A/G	0.6395	0.0161	0.0018	5.8e-19	687255
rs7176235	15:72999104	BBS4	A/G	0.3597	-0.0159	0.0018	1.1e-18	689430
rs2531992	16:4021734	CREBBP	A/G	0.1504	-0.0198	0.0023	2.3e-18	791181
rs2240735	16:4027605	CREBBP	T/C	0.7501	0.018	0.0021	3.7e-18	613431
rs7178130	15:72978202	BBS4	A/G	0.6379	0.0156	0.0018	6.8e-18	688608
rs11072384	15:73001314	BBS4	T/C	0.2085	-0.0178	0.0021	1.7e-17	691516
rs7176223	15:73077742	BBS4	T/G	0.3493	-0.0156	0.0018	2.8e-17	633050
rs758747	16:3627358	CREBBP	T/C	0.2739	0.0158	0.0019	3.1e-17	768256
rs2238439	16:4031348	CREBBP	A/G	0.2244	-0.0175	0.0021	3.4e-17	691012
rs4777546	15:73104435	BBS4	A/G	0.3811	-0.0149	0.0018	4.3e-17	686669
rs2601777	16:4035068	CREBBP	A/G	0.372	-0.0144	0.0017	9.4e-17	778986
rs2012253	15:73008123	BBS4	A/G	0.209	-0.0175	0.0022	5.1e-16	636285
rs8046007	16:4005521	CREBBP	T/C	0.5327	0.0141	0.0018	8.3e-16	684420
rs946824	1:243684019	SDCCAG8	T/C	0.141	0.0206	0.0026	1.1e-15	689849
rs9806742	15:73051219	BBS4	A/G	0.8826	0.0208	0.0026	1.4e-15	692509
rs7523198	1:243702266	SDCCAG8	T/C	0.8571	-0.0203	0.0026	1.6e-15	689821
rs3753549	1:243722892	SDCCAG8	T/C	0.8563	-0.0203	0.0025	1.7e-15	691062
rs4658403	1:243832560	SDCCAG8	T/C	0.8221	-0.0185	0.0023	1.9e-15	690620
rs17826791	15:73011994	BBS4	C/G	0.883	0.0207	0.0026	2.2e-15	692047
rs1975327	15:73019391	BBS4	A/G	0.8823	0.0207	0.0026	2.2e-15	692285
rs6704286	1:243678389	SDCCAG8	T/G	0.145	0.0203	0.0026	2.8e-15	690606
rs320334	1:243808032	SDCCAG8	A/T	0.1438	0.0201	0.0025	2.9e-15	691226
rs1966419	16:4004793	CREBBP	A/G	0.4626	-0.0138	0.0018	3.3e-15	688270
rs17753768	15:72995969	BBS4	T/C	0.117	-0.0206	0.0026	4.1e-15	691890
rs6688135	1:243743474	SDCCAG8	A/C	0.8561	-0.0198	0.0025	4.6e-15	691592
rs320302	1:243761735	SDCCAG8	A/G	0.8562	-0.0198	0.0025	5.2e-15	691582
rs17827419	15:73079253	BBS4	A/G	0.1179	-0.0206	0.0026	5.5e-15	689037
rs7552982	1:243737428	SDCCAG8	T/C	0.8563	-0.0197	0.0025	5.9e-15	691704
rs320309	1:243781174	SDCCAG8	A/G	0.8567	-0.0197	0.0025	8.1e-15	691568
rs9930893	16:3625448	CREBBP	A/C	0.4847	-0.0129	0.0017	9.2e-15	778729
rs12372979	15:73015760	BBS4	A/C	0.8752	0.0198	0.0026	1.9e-14	691239
rs12445430	16:3613126	CREBBP	T/C	0.2053	0.0165	0.0022	2e-14	684797
rs10501086	11:27593701	BDNF	A/G	0.08442	0.0223	0.0029	2.7e-14	791410
rs710891	16:3710097	CREBBP	T/C	0.3176	0.0142	0.0019	2.7e-14	686950
rs2010133	15:73101585	BBS4	T/C	0.7223	0.0144	0.0019	3.2e-14	690461
rs320331	1:243797817	SDCCAG8	A/G	0.1429	0.0192	0.0025	3.2e-14	688115
rs8061528	16:3656482	CREBBP	T/C	0.2056	0.0164	0.0022	3.6e-14	676523
rs7171864	15:73227249	BBS4	A/G	0.6681	0.0132	0.0017	4.6e-14	786585
rs3850988	15:72989224	BBS4	A/G	0.2551	-0.0141	0.0019	4.9e-14	791754
rs167661	1:243828306	SDCCAG8	A/T	0.863	-0.0194	0.0026	5e-14	690820
rs11076781	16:3663231	CREBBP	A/G	0.2008	0.0164	0.0022	5.2e-14	679710
rs17309825	11:27526105	BDNF	T/C	0.96018	-0.0312	0.0042	6.8e-14	786406
rs6495018	15:73097018	BBS4	A/G	0.2777	-0.0143	0.0019	7.1e-14	688236
rs13332078	16:29850705	KCTD13	T/C	0.1492	0.0189	0.0025	7.1e-14	636557
rs4787480	16:29857316	KCTD13	A/G	0.1498	0.0186	0.0025	9.4e-14	637103
rs1565228	11:27586436	BDNF	C/G	0.91294	-0.0212	0.0028	9.6e-14	794401
rs7200737	16:3711656	CREBBP	A/G	0.2605	0.0148	0.002	9.8e-14	677966
rs8026559	15:72976511	BBS4	A/T	0.2712	-0.0144	0.0019	1.1e-13	689794
rs320330	1:243798208	SDCCAG8	T/G	0.8255	-0.0177	0.0024	1.4e-13	688697
rs3794701	16:3730578	CREBBP	A/G	0.4771	-0.0128	0.0017	1.8e-13	682455
rs3815824	16:29852860	KCTD13	T/C	0.1486	0.018	0.0024	1.8e-13	691460
rs1045968	16:29826365	KCTD13	T/G	0.151	0.0184	0.0025	1.9e-13	638154
rs7517732	1:243821364	SDCCAG8	T/C	0.1365	0.019	0.0026	2.3e-13	690618
rs7497429	15:72981631	BBS4	A/T	0.2513	-0.0145	0.002	2.6e-13	689907
rs2601773	16:4001898	CREBBP	A/C	0.496	0.0126	0.0017	2.6e-13	687090
rs2415212	15:73227669	BBS4	A/G	0.6522	0.0134	0.0018	2.7e-13	683233
rs12917712	16:29882490	KCTD13	T/C	0.3296	0.0134	0.0018	3e-13	692496
rs12439108	15:73150288	BBS4	T/C	0.5626	0.0126	0.0017	3.7e-13	690360
rs2415213	15:73227930	BBS4	C/G	0.3471	-0.0133	0.0018	3.7e-13	683621
rs1053874	16:3707747	CREBBP	A/G	0.2974	0.013	0.0018	4.1e-13	782167
rs13331733	16:29848417	KCTD13	A/G	0.8516	-0.0178	0.0025	4.2e-13	691378
rs2238427	16:4003763	CREBBP	A/G	0.4745	0.0126	0.0017	4.3e-13	678381
rs8033644	15:73010784	BBS4	A/G	0.2496	-0.0144	0.002	4.4e-13	690370
rs17753627	15:72975502	BBS4	A/G	0.8743	0.0185	0.0026	5.5e-13	691173
rs320332	1:243797799	SDCCAG8	A/C	0.8257	-0.0172	0.0024	5.9e-13	684960
rs7549780	1:243712455	SDCCAG8	A/C	0.3247	0.0133	0.0018	7.1e-13	689370
rs1799892	16:3707409	CREBBP	C/G	0.3186	0.0135	0.0019	7.2e-13	664141
rs10519024	15:73065871	BBS4	T/C	0.8827	0.0191	0.0027	7.3e-13	691100
rs8045058	16:3691655	CREBBP	C/G	0.3205	0.0135	0.0019	9e-13	666104
rs2415168	15:73109629	BBS4	A/G	0.7524	0.0134	0.0019	1e-12	791894
rs7201519	16:29859977	KCTD13	A/G	0.8503	-0.0175	0.0025	1.1e-12	679683
rs2291409	1:243732197	SDCCAG8	A/G	0.6756	-0.0131	0.0018	1.1e-12	690041
rs4788187	16:29845685	KCTD13	T/C	0.8506	-0.0174	0.0024	1.2e-12	691438
rs9938630	16:29837108	KCTD13	T/C	0.1488	0.0175	0.0025	1.2e-12	689307
rs12144559	1:243723214	SDCCAG8	A/C	0.6771	-0.0131	0.0018	1.4e-12	691149
rs1057452	16:29833714	KCTD13	A/G	0.03713	0.0173	0.0024	1.6e-12	692447
rs11072394	15:73150671	BBS4	T/C	0.4409	-0.0123	0.0017	1.7e-12	687603
rs12744297	1:243734296	SDCCAG8	A/G	0.6756	-0.013	0.0018	1.7e-12	690211
rs8058824	16:29828710	KCTD13	C/G	0.8492	-0.0172	0.0024	2e-12	691468
rs890357	15:73118658	BBS4	C/G	0.1305	-0.0177	0.0025	2.2e-12	684031
rs10835219	11:27791178	BDNF	A/C	0.639	0.013	0.0019	2.2e-12	664064
rs10204	16:29826538	KCTD13	T/C	0.152	0.0173	0.0025	2.4e-12	667658
rs1486472	1:243803714	SDCCAG8	A/G	0.6452	-0.0128	0.0018	2.4e-12	687802
rs2125231	1:243762299	SDCCAG8	T/C	0.3229	0.0129	0.0018	2.5e-12	691060
rs1057451	16:29833488	KCTD13	T/G	0.1532	0.017	0.0024	2.6e-12	692315
rs1299735	15:73113690	BBS4	T/C	0.1304	-0.0174	0.0025	3e-12	692188
rs12749316	1:243792781	SDCCAG8	A/G	0.6755	-0.0129	0.0018	3e-12	689408
rs6495020	15:73110820	BBS4	A/G	0.8694	0.0174	0.0025	3.1e-12	691917
rs1352162	1:243717682	SDCCAG8	A/G	0.3273	0.0122	0.0018	3.9e-12	790792
rs740862	16:3689678	CREBBP	T/G	0.7204	-0.0127	0.0018	4.9e-12	772262
rs7178889	15:73111717	BBS4	T/C	0.1304	-0.0164	0.0024	5.3e-12	794826
rs2072346	16:4027423	CREBBP	T/C	0.8088	0.0153	0.0022	6.1e-12	675193
rs2899809	15:73133045	BBS4	A/G	0.438	-0.0113	0.0017	6.2e-12	789764
rs908867	11:27745764	BDNF	T/C	0.09594	0.0187	0.0027	6.7e-12	794383
rs4658585	1:243803922	SDCCAG8	A/G	0.6765	-0.0126	0.0018	7.7e-12	690254
rs7939810	11:27633409	BDNF	T/C	0.6377	0.0117	0.0017	7.9e-12	791415
rs12691548	1:243820128	SDCCAG8	A/G	0.323	0.0127	0.0019	9e-12	689286
rs2238426	16:4003733	CREBBP	A/G	0.531	-0.0119	0.0018	9.7e-12	672582
rs8058233	16:3638809	CREBBP	A/G	0.2861	0.013	0.0019	1e-11	683189
rs4787483	16:29885447	KCTD13	A/G	0.6546	-0.0124	0.0018	1e-11	691316
rs11150582	16:30034127	KCTD13	C/G	0.1438	0.0179	0.0026	1.1e-11	622470
rs4658401	1:243803979	SDCCAG8	T/G	0.6764	-0.0126	0.0019	1.2e-11	684410
rs1859379	16:3608256	CREBBP	T/C	0.4999	-0.0117	0.0017	1.4e-11	677684
rs11589907	1:243818260	SDCCAG8	T/C	0.3232	0.0125	0.0019	1.4e-11	689704
rs2238424	16:4003044	CREBBP	T/G	0.4633	0.0118	0.0018	2e-11	671653
rs7189777	16:4002320	CREBBP	C/G	0.6204	0.012	0.0018	2.6e-11	688469
rs12448738	16:56489343	BBS2	A/C	0.8629	-0.0168	0.0025	2.8e-11	691932
rs17183750	16:3709523	CREBBP	A/G	0.1742	0.0154	0.0023	2.9e-11	675248
rs933392	16:4032716	CREBBP	T/G	0.1572	-0.0157	0.0024	3.7e-11	674431
rs11646287	16:3719344	CREBBP	T/C	0.3217	0.0123	0.0019	3.9e-11	686323
rs11072392	15:73149658	BBS4	T/C	0.5454	0.0114	0.0017	4e-11	692542
rs7523742	1:243688150	SDCCAG8	A/G	0.0922	0.0206	0.0031	4.1e-11	691627
rs12439063	15:73150166	BBS4	T/C	0.5438	0.0114	0.0017	4.3e-11	690752
rs3810812	16:3639139	CREBBP	A/G	0.4877	-0.0114	0.0017	4.3e-11	692565
rs7189122	16:56471410	BBS2	T/C	0.8299	-0.015	0.0023	4.5e-11	692600
rs735830	16:3695354	CREBBP	A/G	0.2039	0.014	0.0021	4.5e-11	682721
rs12444921	16:56503416	BBS2	T/G	0.8682	-0.0166	0.0025	4.7e-11	692218
rs320308	1:243780198	SDCCAG8	A/G	0.1232	0.018	0.0027	4.8e-11	691026
rs2288055	16:56501806	BBS2	T/C	0.1362	0.0166	0.0025	4.9e-11	692220
rs11344	16:29910518	KCTD13	C/G	0.6443	-0.012	0.0018	5e-11	690444
rs1973284	1:243856681	SDCCAG8	A/G	0.3159	0.0122	0.0019	5.2e-11	688441
rs12206564	6:100987009	SIM1	T/C	0.505	-0.0113	0.0017	5.4e-11	689836
rs12660725	6:100978570	SIM1	T/C	0.4715	0.0113	0.0017	5.5e-11	689836
rs2001102	6:100978351	SIM1	T/C	0.4725	0.0113	0.0017	5.5e-11	689919
rs11072393	15:73149683	BBS4	A/G	0.4546	-0.0113	0.0017	5.6e-11	692368
rs11155496	6:100988939	SIM1	T/C	0.5272	-0.0113	0.0017	5.6e-11	689912
rs240164	6:101044487	SIM1	A/T	0.5306	-0.0113	0.0017	5.6e-11	688419
rs2398132	6:100981200	SIM1	A/C	0.5267	-0.0113	0.0017	5.8e-11	689879
rs1187352	9:87293457	NTRK2	T/C	0.3482	-0.0119	0.0018	6e-11	688522
rs108422	6:101039279	SIM1	C/G	0.5307	-0.0113	0.0017	6e-11	689275
rs11640452	16:56525060	BBS2	A/G	0.1725	0.0152	0.0023	6.1e-11	692303
rs240764	6:100953148	SIM1	A/G	0.4692	0.0114	0.0017	6.2e-11	679526
rs11030123	11:27748285	BDNF	A/G	0.09822	0.018	0.0028	6.3e-11	772096
rs7498372	16:29910725	KCTD13	A/G	0.6421	-0.0122	0.0019	6.9e-11	637232
rs8049949	16:56530377	BBS2	A/G	0.8652	-0.0164	0.0025	7.4e-11	692333
rs10927056	1:243822570	SDCCAG8	T/C	0.2903	0.0124	0.0019	7.4e-11	689523
rs10457809	6:100984400	SIM1	T/C	0.4725	0.0112	0.0017	7.5e-11	690549
rs4461738	6:100977940	SIM1	T/C	0.5275	-0.0113	0.0017	7.5e-11	683905
rs11155498	6:101019551	SIM1	C/G	0.4732	0.0113	0.0017	7.7e-11	688314
rs3228	16:56511245	BBS2	T/G	0.865	-0.0164	0.0025	7.9e-11	691695
rs1875400	6:101020968	SIM1	T/C	0.5268	-0.0112	0.0017	7.9e-11	688844
rs918784	16:56512769	BBS2	A/G	0.8637	-0.0164	0.0025	8e-11	692277
rs13332500	16:3575270	CREBBP	T/G	0.6871	-0.0122	0.0019	8.6e-11	678352
rs11649379	16:56493573	BBS2	T/C	0.1716	0.0147	0.0023	9.3e-11	691694
rs2288056	16:56519097	BBS2	A/G	0.8651	-0.0163	0.0025	9.9e-11	692328
rs10457808	6:100979506	SIM1	A/T	0.527	-0.0111	0.0017	1e-10	690454
rs12206945	6:101018032	SIM1	A/G	0.5265	-0.0111	0.0017	1e-10	687449
rs12447395	16:56529340	BBS2	T/C	0.8617	-0.0163	0.0025	1.1e-10	690595
rs17828296	15:73146865	BBS4	T/C	0.4417	-0.0112	0.0017	1.1e-10	689360
rs7528450	1:243789305	SDCCAG8	A/T	0.6687	-0.0119	0.0018	1.1e-10	689630
rs2062634	6:101002618	SIM1	C/G	0.4712	0.0111	0.0017	1.1e-10	689132
rs12739344	1:243791312	SDCCAG8	C/G	0.669	-0.0119	0.0018	1.2e-10	689629
rs2161738	16:56542340	BBS2	C/G	0.8651	-0.0162	0.0025	1.3e-10	689414
rs12374612	6:100955752	SIM1	T/C	0.4739	0.0111	0.0017	1.3e-10	686656
rs1635404	16:3747042	CREBBP	T/G	0.6925	0.0121	0.0019	1.6e-10	691805
rs1875401	6:101023588	SIM1	A/G	0.4723	0.011	0.0017	1.7e-10	689270
rs239236	6:101099217	SIM1	A/G	0.4854	0.011	0.0017	1.7e-10	688198
rs12447295	16:56542121	BBS2	T/C	0.8286	-0.0145	0.0023	1.8e-10	689412
rs2531988	16:4028417	CREBBP	T/G	0.1641	-0.0149	0.0023	2e-10	674248
rs240115	6:101053069	SIM1	T/C	0.4655	0.011	0.0017	2.1e-10	687546
rs6500550	16:3746241	CREBBP	T/C	0.3005	0.012	0.0019	2.4e-10	684834
rs239226	6:101107969	SIM1	C/G	0.5363	-0.011	0.0017	2.4e-10	682574
rs1187321	9:87283031	NTRK2	A/T	0.8041	0.0137	0.0022	2.5e-10	692346
rs151640	6:101111521	SIM1	A/C	0.4863	0.0109	0.0017	2.6e-10	688383
rs240113	6:101058886	SIM1	A/G	0.5332	-0.0109	0.0017	3e-10	685976
rs239234	6:101101234	SIM1	A/G	0.5144	-0.0108	0.0017	3.3e-10	688209
rs239223	6:101112345	SIM1	A/G	0.4637	0.0108	0.0017	3.4e-10	688338
rs454747	6:101055566	SIM1	T/C	0.4855	0.0111	0.0018	3.4e-10	633288
rs1147194	9:87272731	NTRK2	T/C	0.196	-0.0136	0.0022	3.5e-10	692607
rs239249	6:101087081	SIM1	A/G	0.5368	-0.0108	0.0017	3.6e-10	687611
rs240154	6:101065792	SIM1	T/G	0.5364	-0.0108	0.0017	3.6e-10	687330
rs12933120	16:3634746	CREBBP	A/C	0.1389	0.0157	0.0025	3.8e-10	684239
rs1260326	2:27730940	IFT172	T/C	0.4027	-0.0105	0.0017	3.9e-10	784462
rs151573	6:101086333	SIM1	T/C	0.4636	0.0108	0.0017	4e-10	688146
rs239229	6:101105975	SIM1	T/C	0.4637	0.0108	0.0017	4e-10	689160
rs240146	6:101078718	SIM1	A/G	0.5362	-0.0108	0.0017	4.1e-10	686671
rs151572	6:101110984	SIM1	T/C	0.5363	-0.0108	0.0017	4.2e-10	689212
rs239232	6:101103038	SIM1	A/G	0.5364	-0.0108	0.0017	4.2e-10	688939
rs239238	6:101094880	SIM1	T/G	0.5364	-0.0108	0.0017	4.4e-10	688059
rs1147199	9:87275895	NTRK2	A/G	0.1974	-0.0136	0.0022	4.5e-10	684867
rs2290753	1:243806438	SDCCAG8	A/G	0.6684	-0.0117	0.0019	4.5e-10	640659
rs239239	6:101094554	SIM1	A/G	0.4638	0.0108	0.0017	4.5e-10	688140
rs1284048	15:73119069	BBS4	T/C	0.2793	-0.012	0.0019	4.7e-10	690578
rs17827948	15:73126490	BBS4	T/C	0.4906	-0.0107	0.0017	5e-10	687643
rs1211166	9:87285992	NTRK2	A/G	0.8054	0.0135	0.0022	5e-10	691935
rs239242	6:101092776	SIM1	T/C	0.5364	-0.0107	0.0017	5.1e-10	688801
rs2041247	16:4032581	CREBBP	T/C	0.1609	-0.0145	0.0023	5.3e-10	678813
rs1187323	9:87283416	NTRK2	A/C	0.8057	0.0135	0.0022	5.3e-10	692237
rs239247	6:101088350	SIM1	T/C	0.4637	0.0106	0.0017	6.4e-10	688919
rs11792069	9:140646121	EHMT1	A/G	0.83	0.0145	0.0024	6.5e-10	644252
rs7184983	16:56554709	BBS2	A/G	0.1323	0.0159	0.0026	6.8e-10	692044
rs2997494	1:243614681	SDCCAG8	A/G	0.08986	0.0198	0.0032	8e-10	680483
rs1284049	15:73120343	BBS4	A/G	0.5039	0.0106	0.0017	8.3e-10	687972
rs239245	6:101090377	SIM1	A/C	0.5362	-0.0109	0.0018	8.6e-10	633839
rs10927035	1:243703982	SDCCAG8	T/C	0.6393	-0.0111	0.0018	9.9e-10	688211
rs7975791	12:49413486	KMT2D	T/C	0.03601	-0.0264	0.0043	1.1e-09	770139
rs3006927	1:243657399	SDCCAG8	T/C	0.8332	-0.0147	0.0024	1.2e-09	691638
rs3730124	16:4041995	CREBBP	T/C	0.09729	-0.0188	0.0031	2e-09	654221
rs1187351	9:87295077	NTRK2	A/C	0.3993	-0.0106	0.0018	2.1e-09	687350
rs2230739	16:4033436	CREBBP	T/C	0.6952	-0.0115	0.0019	2.2e-09	650546
rs1619120	9:87302196	NTRK2	A/G	0.4013	-0.0099	0.0017	2.4e-09	791760
rs833831	12:49333248	KMT2D	T/G	0.8716	0.016	0.0027	2.6e-09	667741
rs240762	6:100985574	SIM1	T/C	0.5759	0.0103	0.0017	2.8e-09	691458
rs240780	6:100964147	SIM1	C/G	0.5761	0.0103	0.0017	3e-09	692409
rs12628891	22:38317137	SOX10	T/C	0.3169	-0.0112	0.0019	3e-09	686575
rs726432	9:87247448	NTRK2	T/C	0.585	0.0104	0.0017	3.2e-09	691787
rs240783	6:100968737	SIM1	T/C	0.4241	-0.0103	0.0017	3.2e-09	691239
rs9485165	6:101005474	SIM1	A/G	0.4234	-0.0103	0.0017	3.2e-09	689965
rs240770	6:101010200	SIM1	A/G	0.5767	0.0103	0.0017	3.3e-09	690471
rs240771	6:101009823	SIM1	T/C	0.4184	-0.0103	0.0017	3.3e-09	687981
rs11373	16:56545175	BBS2	T/C	0.8289	-0.0144	0.0024	3.4e-09	555283
rs12042959	1:243533273	SDCCAG8	A/G	0.8495	0.0144	0.0024	3.4e-09	685384
rs12478556	2:63341711	WDPCP	A/T	0.4177	0.0103	0.0018	4.5e-09	683709
rs1006399	6:101039470	SIM1	A/G	0.4533	-0.0101	0.0017	4.6e-09	688931
rs3006928	1:243658030	SDCCAG8	A/G	0.1498	0.0151	0.0026	4.7e-09	684732
rs10158245	1:243833397	SDCCAG8	A/C	0.3174	0.0108	0.0019	5.5e-09	690404
rs747973	16:29875241	KCTD13	A/G	0.6949	-0.0113	0.0019	5.6e-09	674448
rs6500548	16:3710537	CREBBP	C/G	0.2963	-0.0113	0.0019	5.7e-09	677232
rs240152	6:101067489	SIM1	C/G	0.5284	-0.01	0.0017	5.7e-09	687518
rs240151	6:101067720	SIM1	A/T	0.4716	0.01	0.0017	6.1e-09	687519
rs2239304	16:4037394	CREBBP	A/G	0.263	-0.0116	0.002	6.2e-09	687219
rs5750508	22:38303155	SOX10	T/C	0.3224	-0.0108	0.0019	6.3e-09	688225
rs12029086	1:243564722	SDCCAG8	T/G	0.1421	-0.0142	0.0025	6.6e-09	692525
rs1136948	16:3721773	CREBBP	C/G	0.1819	0.014	0.0024	6.7e-09	518522
rs11649864	17:56093061	MKS1	A/G	0.09127	0.0178	0.0031	6.7e-09	663638
rs1187336	9:87316868	NTRK2	A/T	0.373	-0.0103	0.0018	7e-09	692361
rs1187337	9:87316037	NTRK2	T/C	0.4519	-0.01	0.0017	7e-09	692144
rs4671457	2:63346356	WDPCP	T/C	0.4166	0.0101	0.0018	7.4e-09	684558
rs11641763	16:3684253	CREBBP	A/G	0.6764	-0.0108	0.0019	9.4e-09	678052
rs2285178	22:38205989	SOX10	T/C	0.6891	-0.0112	0.0019	9.4e-09	638268
rs139531	22:41676176	EP300	A/G	0.7197	0.0112	0.0019	9.5e-09	690810
rs11168936	12:49645240	KMT2D	T/C	0.6553	-0.0104	0.0018	9.9e-09	692324
rs10852636	16:3676310	CREBBP	T/C	0.6575	-0.0108	0.0019	1e-08	664710
rs1659400	9:87325994	NTRK2	A/G	0.4573	-0.0099	0.0017	1e-08	691232
rs997229	6:101036713	SIM1	T/C	0.5489	0.0099	0.0017	1e-08	689120
rs2238443	16:4035897	CREBBP	A/G	0.2899	0.0112	0.002	1.1e-08	666441
rs12933766	16:29922011	KCTD13	T/C	0.5734	0.0104	0.0018	1.1e-08	625550
rs1659401	9:87324683	NTRK2	T/C	0.5425	0.0098	0.0017	1.1e-08	691214
rs1778931	9:87323775	NTRK2	A/G	0.4573	-0.0098	0.0017	1.1e-08	691239
rs6429425	1:243590990	SDCCAG8	T/G	0.1451	-0.0141	0.0025	1.1e-08	690495
rs240769	6:101012187	SIM1	A/C	0.4155	-0.01	0.0018	1.1e-08	682964
rs3751841	16:3699822	CREBBP	T/G	0.1848	0.0127	0.0022	1.2e-08	680496
rs9989424	16:3672587	CREBBP	C/G	0.3115	0.0108	0.0019	1.3e-08	671238
rs2265	9:87331606	NTRK2	T/C	0.5425	0.0098	0.0017	1.3e-08	691089
rs1006398	6:101037718	SIM1	A/T	0.4594	-0.0098	0.0017	1.3e-08	688785
rs3790116	16:56388044	BBS2	T/C	0.1327	0.0139	0.0024	1.4e-08	791603
rs240148	6:101076767	SIM1	T/C	0.5506	-0.0098	0.0017	1.4e-08	686998
rs12037698	1:243584345	SDCCAG8	A/G	0.1451	-0.014	0.0025	1.5e-08	678629
rs240766	6:100954036	SIM1	A/G	0.5475	0.0098	0.0017	1.5e-08	686166
rs2162014	2:63345507	WDPCP	A/C	0.4158	0.0099	0.0018	1.5e-08	683144
rs139477	22:41624461	EP300	A/G	0.7197	0.011	0.0019	1.6e-08	678857
rs6547735	2:27831607	IFT172	T/C	0.7923	-0.012	0.0021	1.6e-08	776048
rs1857859	6:100894587	SIM1	A/G	0.2701	-0.0103	0.0018	1.7e-08	795389
rs2489162	9:87333742	NTRK2	A/G	0.5424	0.0097	0.0017	1.8e-08	690829
rs240153	6:101067135	SIM1	A/C	0.4493	0.0097	0.0017	1.8e-08	687461
rs240776	6:101020453	SIM1	T/C	0.4574	-0.0097	0.0017	1.8e-08	689085
rs1439048	9:87327889	NTRK2	T/G	0.4577	-0.0097	0.0017	1.9e-08	691272
rs1778932	9:87324212	NTRK2	A/G	0.5427	0.0097	0.0017	1.9e-08	691225
rs9373504	6:100941037	SIM1	A/G	0.447	-0.0097	0.0017	1.9e-08	689359
rs780093	2:27742603	IFT172	T/C	0.3941	-0.0093	0.0017	2e-08	794606
rs9322076	6:100952020	SIM1	T/C	0.5531	0.0098	0.0017	2e-08	681399
rs1728918	2:27635463	IFT172	A/G	0.2717	-0.0114	0.002	2.2e-08	572468
rs4820429	22:41538111	EP300	C/G	0.285	-0.0107	0.0019	2.3e-08	691942
rs1129700	16:29918034	KCTD13	T/C	0.4373	-0.0099	0.0018	2.3e-08	677226
rs1187343	9:87308783	NTRK2	A/G	0.6221	0.0099	0.0018	2.3e-08	692591
rs2579369	9:87329587	NTRK2	T/C	0.4583	-0.0096	0.0017	2.3e-08	691159
rs2918626	9:87328983	NTRK2	T/C	0.4662	-0.0091	0.0016	2.3e-08	794721
rs1953	22:41641984	EP300	T/C	0.2744	-0.0104	0.0019	2.4e-08	781918
rs7510675	22:41549297	EP300	A/G	0.2851	-0.0107	0.0019	2.4e-08	691932
rs881301	8:38332318	FGFR1	T/C	0.5818	-0.0097	0.0017	2.4e-08	691753
rs2213595	6:100935819	SIM1	A/G	0.5531	0.0096	0.0017	2.4e-08	690618
rs240141	6:101084946	SIM1	A/G	0.5506	-0.0097	0.0017	2.4e-08	685804
rs780094	2:27741237	IFT172	T/C	0.3934	-0.0093	0.0017	2.5e-08	795482
rs1054442	12:49389320	KMT2D	A/C	0.6178	-0.0103	0.0018	2.5e-08	625990
rs240765	6:100953883	SIM1	T/C	0.5424	0.0096	0.0017	2.5e-08	684899
rs6929748	6:100929394	SIM1	T/C	0.4469	-0.0096	0.0017	2.5e-08	690840
rs6901944	6:56862805	RAB23	A/G	0.8344	-0.0126	0.0023	2.7e-08	692035
rs2158443	16:3685782	CREBBP	C/G	0.322	0.0105	0.0019	2.8e-08	671295
rs10927006	1:243557659	SDCCAG8	T/C	0.851	0.0136	0.0024	2.8e-08	683551
rs11644679	16:56490549	BBS2	A/G	0.1681	0.0122	0.0022	2.9e-08	790999
rs3829541	16:3730499	CREBBP	C/G	0.5402	-0.0097	0.0017	2.9e-08	682952
rs10875910	12:49402393	KMT2D	C/G	0.3625	0.01	0.0018	3.1e-08	690113
rs11168850	12:49472965	KMT2D	A/G	0.4446	0.0096	0.0017	3.1e-08	690146
rs2397974	6:100925828	SIM1	T/C	0.5536	0.0095	0.0017	3.1e-08	691048
rs2016661	15:72922676	BBS4	T/C	0.6824	0.01	0.0018	3.2e-08	779451
rs10875912	12:49416944	KMT2D	T/C	0.6355	-0.01	0.0018	3.3e-08	690454
rs2071826	6:100928357	SIM1	A/G	0.5534	0.0095	0.0017	3.3e-08	690746
rs10927010	1:243578812	SDCCAG8	A/G	0.1409	-0.0138	0.0025	3.4e-08	679522
rs12140432	1:243596287	SDCCAG8	A/G	0.1415	-0.0138	0.0025	3.4e-08	679168
rs3818233	6:101086372	SIM1	C/G	0.4592	-0.0095	0.0017	3.4e-08	687912
rs3026659	22:38396220	SOX10	T/C	0.3649	-0.01	0.0018	3.4e-08	683489
rs139474	22:41619226	EP300	C/G	0.3784	-0.0098	0.0018	3.5e-08	691051
rs13220575	6:56867037	RAB23	T/C	0.1656	0.0125	0.0023	3.5e-08	691710
rs7751526	6:100949822	SIM1	A/G	0.4462	-0.0095	0.0017	3.5e-08	687289
rs6580699	12:49478812	KMT2D	T/G	0.5544	-0.0095	0.0017	3.6e-08	692518
rs139492	22:41628902	EP300	T/G	0.3733	-0.0099	0.0018	3.7e-08	687562
rs11614738	12:49424616	KMT2D	A/G	0.3628	0.01	0.0018	3.7e-08	689702
rs10927016	1:243595136	SDCCAG8	T/C	0.1401	-0.0137	0.0025	3.9e-08	690820
rs7452753	6:101053726	SIM1	T/C	0.4584	-0.0095	0.0017	3.9e-08	688456
rs5758223	22:41489920	EP300	A/G	0.7147	0.0106	0.0019	4e-08	689935
rs2281336	22:41635204	EP300	C/G	0.377	-0.0099	0.0018	4.1e-08	684449
rs9386154	6:100923704	SIM1	C/G	0.5536	0.0094	0.0017	4.3e-08	691125
rs7201929	16:28871966	SH2B1	T/C	0.7566	0.0105	0.0019	4.6e-08	794892
rs6901854	6:100932291	SIM1	T/C	0.5427	0.0094	0.0017	4.7e-08	690970
rs11649287	16:4039968	CREBBP	A/G	0.7285	0.0109	0.002	4.9e-08	677320
rs139485	22:41627606	EP300	A/G	0.3771	-0.0097	0.0018	5.1e-08	692651
rs8071116	17:56119763	MKS1	A/T	0.08881	0.0168	0.0031	5.1e-08	663060
rs139484	22:41627543	EP300	T/G	0.6234	0.0097	0.0018	5.5e-08	692320
rs720884	6:56877318	RAB23	A/G	0.835	-0.0123	0.0023	5.5e-08	691735
rs2158962	16:3738027	CREBBP	A/G	0.5353	-0.0095	0.0017	5.6e-08	680673
rs1187356	9:87305257	NTRK2	A/T	0.5734	0.0094	0.0017	5.6e-08	691095
rs2446972	12:49256158	KMT2D	C/G	0.4107	0.0097	0.0018	5.7e-08	673374
rs3721	22:41627073	EP300	T/C	0.3768	-0.0097	0.0018	5.8e-08	691997
rs1569858	22:41541024	EP300	A/G	0.3784	-0.0097	0.0018	5.9e-08	692122
rs7969091	12:49464449	KMT2D	A/G	0.555	-0.0094	0.0017	6e-08	683642
rs139486	22:41627654	EP300	C/G	0.6244	0.0097	0.0018	6.2e-08	692192
rs2134044	6:101075354	SIM1	A/C	0.4587	-0.0093	0.0017	6.2e-08	688672
rs7127273	11:27540084	BDNF	T/C	0.04227	0.0218	0.004	6.6e-08	769661
rs893582	9:87310361	NTRK2	A/G	0.4266	-0.0093	0.0017	6.8e-08	691145
rs139439	22:41606030	EP300	A/C	0.6206	0.0096	0.0018	6.9e-08	692565
rs2038209	22:41594611	EP300	T/C	0.3821	-0.0096	0.0018	6.9e-08	690009
rs139464	22:41614020	EP300	C/G	0.6208	0.0096	0.0018	7e-08	692537
rs2413637	22:41541527	EP300	C/G	0.6221	0.0096	0.0018	7e-08	691972
rs12035042	1:243583899	SDCCAG8	T/G	0.8506	0.0132	0.0025	7e-08	678699
rs2413485	22:38193920	SOX10	T/C	0.6129	-0.0096	0.0018	7e-08	691279
rs139460	22:41611063	EP300	T/C	0.6203	0.0096	0.0018	7.1e-08	692509
rs139452	22:41610172	EP300	C/G	0.3792	-0.0096	0.0018	7.2e-08	692554
rs4822011	22:41550954	EP300	T/C	0.6212	0.0096	0.0018	7.3e-08	692115
rs738631	22:41511176	EP300	A/G	0.6225	0.0096	0.0018	7.3e-08	691775
rs1187341	9:87311715	NTRK2	T/G	0.5736	0.0094	0.0017	7.3e-08	685057
rs8034787	15:73148345	BBS4	T/G	0.1583	-0.0124	0.0023	7.5e-08	689444
rs20552	22:41551039	EP300	A/T	0.6211	0.0097	0.0018	7.5e-08	690634
rs4820431	22:41549921	EP300	A/C	0.377	-0.0096	0.0018	7.5e-08	691789
rs1847912	6:100880696	SIM1	A/G	0.7567	0.0108	0.002	7.6e-08	690617
rs139432	22:41604557	EP300	A/G	0.3794	-0.0096	0.0018	7.7e-08	692571
rs139455	22:41610406	EP300	C/G	0.6205	0.0096	0.0018	7.7e-08	692616
rs139457	22:41610667	EP300	T/C	0.6253	0.0096	0.0018	7.7e-08	692617
rs10459232	12:49467076	KMT2D	A/C	0.5562	-0.0094	0.0017	7.7e-08	684033
rs7773043	6:100921115	SIM1	A/G	0.5443	0.0092	0.0017	7.7e-08	691960
rs85220	22:41612965	EP300	T/G	0.6205	0.0096	0.0018	7.8e-08	692615
rs4822006	22:41519362	EP300	T/C	0.379	-0.0096	0.0018	7.9e-08	692425
rs11657437	17:56124979	MKS1	A/T	0.1099	0.0151	0.0028	8e-08	663383
rs139450	22:41609859	EP300	T/C	0.6205	0.0096	0.0018	8.1e-08	692599
rs2076577	22:41568480	EP300	T/C	0.3791	-0.0096	0.0018	8.1e-08	692054
rs133015	22:38572526	SOX10	C/G	0.5589	-0.0093	0.0017	8.1e-08	691618
rs1033611	22:41558232	EP300	A/G	0.3817	-0.0096	0.0018	8.2e-08	692079
rs139451	22:41610024	EP300	A/G	0.3799	-0.0096	0.0018	8.2e-08	692599
rs1274726	12:49501398	KMT2D	T/C	0.5904	-0.0096	0.0018	8.2e-08	686163
rs139453	22:41610242	EP300	A/G	0.6205	0.0095	0.0018	8.4e-08	691170
rs139454	22:41610391	EP300	A/G	0.3795	-0.0095	0.0018	8.4e-08	692612
rs5758237	22:41515744	EP300	T/G	0.3799	-0.0096	0.0018	8.4e-08	692051
rs5758238	22:41519308	EP300	A/G	0.6207	0.0095	0.0018	8.4e-08	692455
rs139433	22:41604652	EP300	C/G	0.6205	0.0095	0.0018	8.5e-08	692564
rs2068834	2:27839539	IFT172	T/C	0.722	0.0098	0.0018	8.6e-08	793740
rs7219913	17:56115791	MKS1	A/G	0.895	-0.0154	0.0029	8.6e-08	663629
rs17752670	22:38282897	SOX10	T/C	0.2113	-0.0116	0.0022	8.6e-08	679906
rs17685380	6:56875789	RAB23	T/G	0.835	-0.0122	0.0023	8.7e-08	687683
rs2157342	6:100920655	SIM1	A/T	0.5448	0.0092	0.0017	8.8e-08	692565
rs3798497	6:100878858	SIM1	A/G	0.7993	0.0115	0.0022	8.8e-08	690322
rs11687645	2:63562369	WDPCP	A/T	0.5682	-0.0092	0.0017	8.9e-08	691390
rs139475	22:41623996	EP300	T/C	0.3741	-0.0096	0.0018	9e-08	683891
rs6910117	6:84971679	MRAP2	A/T	0.9099	-0.0157	0.0029	9.1e-08	643225
rs11703407	22:38200124	SOX10	T/C	0.313	0.0101	0.0019	9.2e-08	691626
rs11653839	17:56118994	MKS1	A/C	0.1062	0.0155	0.0029	9.3e-08	663828
rs2277844	22:38577515	SOX10	A/G	0.5591	-0.0093	0.0017	9.4e-08	691653
rs4822005	22:41514155	EP300	A/G	0.6201	0.0095	0.0018	9.5e-08	692013
rs13021322	2:63558590	WDPCP	T/C	0.4318	0.0092	0.0017	9.5e-08	691561
rs12580349	12:49436724	KMT2D	A/G	0.637	-0.0097	0.0018	9.6e-08	688209
rs2453472	12:49226743	KMT2D	A/C	0.556	0.0088	0.0016	9.9e-08	783453
rs2141372	2:27827196	IFT172	T/G	0.2112	0.011	0.0021	1.1e-07	710776
rs2267371	22:38577119	SOX10	T/G	0.6598	-0.0097	0.0018	1.1e-07	691435
rs4666000	2:27839369	IFT172	T/C	0.722	0.0097	0.0018	1.2e-07	795000
rs6580698	12:49478658	KMT2D	T/C	0.5543	-0.0092	0.0017	1.2e-07	685265
rs10868219	9:87246283	NTRK2	A/G	0.7178	0.0101	0.0019	1.2e-07	691495
rs7773661	6:100919209	SIM1	A/G	0.4573	-0.0091	0.0017	1.2e-07	692598
rs2071910	22:38204259	SOX10	T/C	0.3107	0.01	0.0019	1.2e-07	692629
rs766314	22:41490680	EP300	C/G	0.6227	0.0094	0.0018	1.3e-07	689227
rs10173115	2:63355520	WDPCP	A/T	0.465	0.0091	0.0017	1.3e-07	684346
rs17309979	11:27852849	BDNF	A/G	0.1618	-0.0126	0.0024	1.4e-07	676034
rs139434	22:41604785	EP300	A/G	0.6206	0.0094	0.0018	1.4e-07	691844
rs2453488	12:49255208	KMT2D	T/C	0.3075	0.01	0.0019	1.4e-07	681635
rs4821722	22:38255325	SOX10	A/G	0.3489	0.0096	0.0018	1.4e-07	691685
rs2384656	2:27832055	IFT172	A/G	0.7363	0.0097	0.0018	1.5e-07	795116
rs10783302	12:49498130	KMT2D	T/G	0.3727	0.0095	0.0018	1.5e-07	691013
rs2285177	22:38205894	SOX10	T/C	0.689	-0.0099	0.0019	1.5e-07	692499
rs11691192	2:63561079	WDPCP	A/C	0.4318	0.0091	0.0017	1.5e-07	685315
rs12160750	22:38199054	SOX10	A/G	0.6891	-0.0099	0.0019	1.6e-07	692391
rs139852	22:38283605	SOX10	A/G	0.649	-0.0096	0.0018	1.6e-07	692131
rs2157472	22:38251686	SOX10	T/C	0.3495	0.0096	0.0018	1.6e-07	692425
rs6000898	22:38202399	SOX10	T/C	0.6893	-0.0099	0.0019	1.6e-07	692594
rs9611497	22:41507400	EP300	A/G	0.3788	-0.0094	0.0018	1.7e-07	689536
rs4840132	6:100914602	SIM1	T/C	0.5415	0.009	0.0017	1.7e-07	691237
rs1919128	2:27801759	IFT172	A/G	0.736	0.0096	0.0018	1.8e-07	795625
rs2994322	1:243639018	SDCCAG8	C/G	0.8048	-0.0121	0.0023	1.8e-07	672797
rs2267424	22:41489526	EP300	A/C	0.6204	0.0093	0.0018	1.9e-07	689225
rs10208529	2:27786188	IFT172	A/T	0.7359	0.0097	0.0019	1.9e-07	784869
rs8061877	16:28856819	SH2B1	T/C	0.2449	-0.0109	0.0021	1.9e-07	594804
rs5995498	22:38196573	SOX10	T/G	0.689	-0.0098	0.0019	1.9e-07	691965
rs12467476	2:27825715	IFT172	T/C	0.7362	0.0096	0.0018	2e-07	795328
rs4665383	2:27791555	IFT172	C/G	0.736	0.0096	0.0018	2e-07	795496
rs1506080	6:100889855	SIM1	A/T	0.2647	-0.0101	0.0019	2e-07	692110
rs241819	6:100910798	SIM1	A/G	0.5413	0.0089	0.0017	2e-07	692550
rs3798492	6:100888625	SIM1	T/C	0.265	-0.0101	0.0019	2e-07	691943
rs4822002	22:41487344	EP300	A/G	0.6202	0.0093	0.0018	2.1e-07	689141
rs4822004	22:41502825	EP300	T/G	0.3799	-0.0093	0.0018	2.1e-07	689320
rs1919129	2:27818721	IFT172	C/G	0.7926	-0.0102	0.002	2.1e-07	795535
rs7571558	2:27839832	IFT172	C/G	0.793	-0.0102	0.002	2.1e-07	789499
rs7286550	22:38196760	SOX10	A/G	0.31	0.0098	0.0019	2.1e-07	692355
rs6719960	2:27830067	IFT172	A/G	0.7924	-0.0102	0.002	2.2e-07	795303
rs965813	2:27789861	IFT172	A/T	0.2067	0.0103	0.002	2.2e-07	795462
rs1045340	12:49221622	KMT2D	A/G	0.4436	-0.009	0.0017	2.2e-07	690180
rs139886	22:38371328	SOX10	T/C	0.6266	-0.0096	0.0019	2.2e-07	593570
rs2710642	2:63149557	WDPCP	A/G	0.6709	0.009	0.0017	2.2e-07	795445
rs1919127	2:27801493	IFT172	T/C	0.7349	0.0096	0.0018	2.3e-07	795532
rs4666002	2:27840640	IFT172	C/G	0.2639	-0.0096	0.0019	2.3e-07	787281
rs4665382	2:27783801	IFT172	T/C	0.7358	0.0095	0.0018	2.4e-07	795573
rs139838	22:38268922	SOX10	A/G	0.3851	0.0087	0.0017	2.4e-07	794950
rs12924990	16:3661815	CREBBP	T/C	0.8377	-0.012	0.0023	2.6e-07	680508
rs6734059	2:27808154	IFT172	T/C	0.7922	-0.0102	0.002	2.6e-07	795535
rs1136951	17:56176372	MKS1	T/G	0.2385	0.0107	0.0021	2.6e-07	678704
rs3798490	6:100894179	SIM1	A/G	0.7349	0.01	0.0019	2.6e-07	692598
rs4329121	6:101087507	SIM1	C/G	0.4671	-0.0089	0.0017	2.6e-07	688114
rs738321	22:38568833	SOX10	C/G	0.6184	-0.0091	0.0018	2.6e-07	691821
rs2108430	16:3738078	CREBBP	T/C	0.2599	0.0102	0.002	2.7e-07	683601
rs4821717	22:38216758	SOX10	A/C	0.35	0.0094	0.0018	2.7e-07	686633
rs1881395	2:27838549	IFT172	A/G	0.2077	0.0102	0.002	2.8e-07	784840
rs2017022	22:38213383	SOX10	A/G	0.35	0.0094	0.0018	2.8e-07	686258
rs4821751	22:38564457	SOX10	T/C	0.6231	-0.0092	0.0018	2.8e-07	690258
rs3830139	6:100896289	SIM1	T/G	0.7346	0.0102	0.002	2.9e-07	636230
rs739269	22:38212068	SOX10	T/C	0.6503	-0.0094	0.0018	2.9e-07	685927
rs13387839	2:63428571	WDPCP	T/C	0.2853	0.0092	0.0018	2.9e-07	791783
rs7164	12:49223719	KMT2D	T/C	0.4432	-0.009	0.0018	3.1e-07	680519
rs833836	12:49451459	KMT2D	T/C	0.1441	-0.013	0.0025	3.1e-07	670427
rs8071036	17:56174500	MKS1	A/G	0.8008	-0.0112	0.0022	3.2e-07	692187
rs13911	22:38212762	SOX10	A/G	0.3498	0.0094	0.0018	3.2e-07	686203
rs5758231	22:41504049	EP300	C/G	0.3817	-0.0091	0.0018	3.3e-07	683552
rs13002853	2:27853245	IFT172	C/G	0.743	0.0096	0.0019	3.3e-07	793772
rs2284058	22:38221658	SOX10	A/G	0.3511	0.0094	0.0018	3.3e-07	686958
rs12805133	11:66483265	BBS1	A/G	0.5426	-0.0091	0.0018	3.5e-07	635477
rs4665991	2:27766284	IFT172	A/G	0.2689	-0.0094	0.0018	3.5e-07	793754
rs12118439	1:243596371	SDCCAG8	T/C	0.1524	-0.0122	0.0024	3.6e-07	690912
rs3811644	2:27802805	IFT172	A/G	0.7931	-0.0102	0.002	3.7e-07	795501
rs139465	22:41614113	EP300	T/C	0.3782	-0.0093	0.0018	3.9e-07	638000
rs12115223	9:87178065	NTRK2	A/G	0.06186	0.0181	0.0036	4.2e-07	692357
rs4821754	22:38581503	SOX10	A/G	0.3	0.0096	0.0019	4.2e-07	691808
rs6026567	20:57444915	GNAS	A/G	0.571	-0.0092	0.0018	4.4e-07	659708
rs12039979	1:243597228	SDCCAG8	A/G	0.1524	-0.0122	0.0024	4.5e-07	679533
rs12140393	1:243596231	SDCCAG8	A/G	0.1524	-0.0122	0.0024	4.5e-07	679156
rs3778032	6:100883851	SIM1	A/C	0.736	0.0097	0.0019	4.7e-07	692542
rs12713488	2:63586777	WDPCP	T/C	0.438	0.0087	0.0017	4.7e-07	691424
rs2144342	22:41513094	EP300	T/G	0.6201	0.0092	0.0018	4.8e-07	638264
rs7296288	12:49479968	KMT2D	A/C	0.5129	-0.0089	0.0018	4.8e-07	675571
rs1439057	9:87186961	NTRK2	A/G	0.06192	0.0181	0.0036	4.8e-07	686116
rs1996401	2:63573748	WDPCP	T/G	0.4378	0.0087	0.0017	4.9e-07	691881
rs7513566	1:243588601	SDCCAG8	T/C	0.1528	-0.0114	0.0023	5e-07	793570
rs132985	22:38563471	SOX10	T/C	0.4711	0.0082	0.0016	5e-07	792079
rs11682642	2:63608550	WDPCP	C/G	0.5616	-0.0086	0.0017	5e-07	692194
rs9610560	22:37064378	IFT27	A/G	0.7375	-0.0099	0.002	5.1e-07	671468
rs12615652	2:63607538	WDPCP	C/G	0.5616	-0.0086	0.0017	5.1e-07	692112
rs262507	2:63883612	WDPCP	A/C	0.2803	0.0096	0.0019	5.1e-07	687544
rs12988058	2:63592397	WDPCP	C/G	0.562	-0.0086	0.0017	5.2e-07	692179
rs2075375	2:63280690	WDPCP	T/C	0.5663	0.0082	0.0016	5.3e-07	788345
rs1881396	2:27844601	IFT172	T/G	0.7914	-0.0098	0.002	5.4e-07	795559
rs7538558	1:243589513	SDCCAG8	A/G	0.1527	-0.0121	0.0024	5.4e-07	678882
rs7290156	22:38218637	SOX10	T/C	0.6473	-0.0092	0.0018	5.4e-07	685795
rs7537757	1:243594664	SDCCAG8	C/G	0.1527	-0.0121	0.0024	5.5e-07	678968
rs6001031	22:38556260	SOX10	T/G	0.6233	-0.0084	0.0017	5.5e-07	792637
rs6722981	2:63916722	WDPCP	T/C	0.3472	-0.0091	0.0018	5.5e-07	684203
rs1607201	2:63614160	WDPCP	C/G	0.5613	-0.0086	0.0017	5.6e-07	692089
rs12447040	16:3718703	CREBBP	A/G	0.1097	0.0144	0.0029	5.7e-07	679093
rs17765088	3:45943595	LZTFL1	C/G	0.8817	-0.0136	0.0027	5.7e-07	666309
rs3778030	6:100906046	SIM1	T/G	0.2651	-0.0097	0.0019	5.7e-07	690036
rs12138272	1:243594202	SDCCAG8	A/G	0.1527	-0.0121	0.0024	5.8e-07	678957
rs6735907	2:63731604	WDPCP	A/G	0.5548	0.0086	0.0017	5.8e-07	689962
rs10927017	1:243595813	SDCCAG8	A/G	0.1524	-0.0121	0.0024	5.9e-07	679134
rs1922422	2:63593212	WDPCP	T/C	0.5616	-0.0086	0.0017	5.9e-07	692117
rs13294446	9:87178986	NTRK2	A/G	0.06186	0.0178	0.0036	6e-07	692390
rs767933	6:100888408	SIM1	C/G	0.2987	-0.0093	0.0019	6e-07	691606
rs12115346	9:87176654	NTRK2	A/T	0.06186	0.0179	0.0036	6.1e-07	686521
rs4820321	22:38579569	SOX10	A/T	0.315	0.0093	0.0019	6.1e-07	691804
rs262501	2:63858657	WDPCP	A/G	0.7115	-0.0094	0.0019	6.1e-07	690734
rs6704596	2:27796927	IFT172	A/G	0.7934	-0.0099	0.002	6.2e-07	795476
rs12151606	2:63430175	WDPCP	T/C	0.6952	-0.0089	0.0018	6.3e-07	792363
rs2422008	2:63780605	WDPCP	A/C	0.4324	-0.0086	0.0017	6.5e-07	690008
rs13283498	9:87185633	NTRK2	A/G	0.06203	0.0178	0.0036	6.6e-07	692389
rs139889	22:38386787	SOX10	A/C	0.681	-0.0093	0.0019	6.6e-07	690052
rs262503	2:63860437	WDPCP	A/G	0.7114	-0.0094	0.0019	6.6e-07	690762
rs12115546	9:87177985	NTRK2	A/G	0.93697	-0.0178	0.0036	6.7e-07	692387
rs1332890	9:87187317	NTRK2	A/G	0.93808	-0.0179	0.0036	6.7e-07	691815
rs17087417	9:87182342	NTRK2	T/G	0.93814	-0.0178	0.0036	6.7e-07	692390
rs240150	6:101072307	SIM1	A/G	0.5017	-0.0086	0.0017	6.7e-07	685827
rs10512150	9:87183603	NTRK2	A/G	0.06186	0.0177	0.0036	6.9e-07	692390
rs13286420	9:87181423	NTRK2	A/G	0.06192	0.0177	0.0036	6.9e-07	692390
rs13286993	9:87181206	NTRK2	T/G	0.93779	-0.0177	0.0036	6.9e-07	692390
rs13296837	9:87182783	NTRK2	A/G	0.06186	0.0177	0.0036	6.9e-07	692390
rs17087422	9:87182977	NTRK2	A/G	0.06186	0.0177	0.0036	6.9e-07	692390
rs196125	2:63859268	WDPCP	T/C	0.7118	-0.0094	0.0019	7e-07	690745
rs7584404	2:63794342	WDPCP	T/C	0.7125	-0.0094	0.0019	7e-07	690815
rs9610561	22:37064528	IFT27	A/G	0.2623	0.0098	0.002	7.1e-07	689226
rs7024651	9:87184049	NTRK2	A/G	0.06192	0.0177	0.0036	7.1e-07	692389
rs7040393	9:87183724	NTRK2	T/C	0.93808	-0.0177	0.0036	7.1e-07	692390
rs10200146	2:63819348	WDPCP	A/G	0.4395	-0.0085	0.0017	7.1e-07	690559
rs13417333	2:63913840	WDPCP	T/C	0.3468	-0.009	0.0018	7.1e-07	683484
rs2677436	2:63495935	WDPCP	A/T	0.2915	0.0093	0.0019	7.1e-07	691776
rs7959831	12:49474232	KMT2D	T/G	0.1477	-0.0122	0.0025	7.2e-07	673479
rs13171414	5:37232079	NIPBL	A/G	0.7836	0.0103	0.0021	7.2e-07	692376
rs13300587	9:87179759	NTRK2	T/G	0.93814	-0.0177	0.0036	7.2e-07	692390
rs17087416	9:87182260	NTRK2	T/C	0.93814	-0.0177	0.0036	7.2e-07	692390
rs139509	22:41652733	EP300	A/G	0.276	-0.01	0.002	7.3e-07	634253
rs9900038	17:56169763	MKS1	A/G	0.237	0.0101	0.002	7.3e-07	679944
rs7040656	9:87183955	NTRK2	T/C	0.93808	-0.0177	0.0036	7.3e-07	692390
rs17245314	6:101039215	SIM1	T/C	0.753	0.0097	0.002	7.3e-07	686575
rs262504	2:63861235	WDPCP	C/G	0.2884	0.0093	0.0019	7.3e-07	690746
rs2168275	2:63912336	WDPCP	A/G	0.6533	0.009	0.0018	7.6e-07	683373
rs2138796	2:63609017	WDPCP	A/T	0.4398	0.0085	0.0017	7.8e-07	692037
rs2699388	2:63496137	WDPCP	A/C	0.7107	-0.0093	0.0019	7.8e-07	691711
rs7292854	22:41700657	EP300	C/G	0.4556	-0.0086	0.0017	7.9e-07	691616
rs2284006	22:37070029	IFT27	T/C	0.262	0.0098	0.002	7.9e-07	677081
rs1001904	9:87271616	NTRK2	T/C	0.892	0.0137	0.0028	7.9e-07	692554
rs4671492	2:63594846	WDPCP	T/C	0.438	0.0085	0.0017	8e-07	692281
rs2284008	22:37073748	IFT27	A/G	0.7364	-0.0098	0.002	8.1e-07	671191
rs4821714	22:38192452	SOX10	T/C	0.6137	-0.0094	0.0019	8.1e-07	553229
rs3957366	6:56905274	RAB23	A/G	0.1495	0.0128	0.0026	8.2e-07	544499
rs17087418	9:87182655	NTRK2	A/G	0.06186	0.0176	0.0036	8.3e-07	692318
rs1550860	2:63779539	WDPCP	T/C	0.2847	0.0094	0.0019	8.4e-07	691108
rs4560098	2:63522578	WDPCP	A/G	0.2896	0.0093	0.0019	8.4e-07	692121
rs5756813	22:38175477	SOX10	T/G	0.6166	-0.0088	0.0018	8.5e-07	692449
rs4416201	2:63512837	WDPCP	A/G	0.2894	0.0093	0.0019	8.5e-07	691994
rs10132	17:56168371	MKS1	A/G	0.763	-0.01	0.002	8.7e-07	691333
rs1001905	9:87272519	NTRK2	A/G	0.108	-0.0136	0.0028	8.7e-07	692574
rs190519	2:63858425	WDPCP	A/T	0.7029	-0.0093	0.0019	8.7e-07	690015
rs6545984	2:63517133	WDPCP	T/G	0.2894	0.0093	0.0019	8.7e-07	691984
rs6705776	2:63521487	WDPCP	T/C	0.2895	0.0093	0.0019	8.7e-07	692129
rs970278	2:63497554	WDPCP	A/C	0.2879	0.0093	0.0019	8.8e-07	691835
rs4682791	3:45665194	LZTFL1	A/G	0.5976	0.0087	0.0018	8.9e-07	682642
rs13283893	9:87186099	NTRK2	A/G	0.93808	-0.0176	0.0036	8.9e-07	692300
rs4428008	2:63522515	WDPCP	T/C	0.7105	-0.0093	0.0019	8.9e-07	692121
rs964903	2:63741548	WDPCP	T/C	0.7125	-0.0093	0.0019	8.9e-07	691627
rs9607368	22:37063951	IFT27	A/G	0.2623	0.0097	0.002	9.1e-07	691241
rs1147195	9:87273174	NTRK2	T/C	0.108	-0.0136	0.0028	9.1e-07	692547
rs1659412	9:87278152	NTRK2	A/G	0.892	0.0136	0.0028	9.1e-07	685059
rs12105140	2:63797218	WDPCP	A/G	0.2862	0.0093	0.0019	9.1e-07	690718
rs10173637	2:63512121	WDPCP	A/G	0.2879	0.0093	0.0019	9.2e-07	691966
rs932173	2:63602689	WDPCP	T/G	0.5599	-0.0084	0.0017	9.2e-07	692219
rs1201364	9:87267378	NTRK2	A/G	0.108	-0.0136	0.0028	9.3e-07	692396
rs13184464	5:37192085	NIPBL	T/C	0.2205	-0.0102	0.0021	9.4e-07	691908
rs2945032	2:63498200	WDPCP	A/C	0.7107	-0.0092	0.0019	9.4e-07	691923
rs6717031	2:63774540	WDPCP	T/C	0.7153	-0.0094	0.0019	9.4e-07	691075
rs12713476	2:63509850	WDPCP	T/G	0.2894	0.0092	0.0019	9.5e-07	692016
rs13288569	9:87185447	NTRK2	A/G	0.93808	-0.0176	0.0036	9.7e-07	692391
rs13285281	9:87181045	NTRK2	A/G	0.93808	-0.0176	0.0036	9.8e-07	692390
rs13285423	9:87181073	NTRK2	A/G	0.93808	-0.0176	0.0036	9.8e-07	692390
rs17087415	9:87180738	NTRK2	T/C	0.06034	0.0176	0.0036	9.8e-07	692390
rs6738190	2:63767199	WDPCP	A/G	0.2845	0.0094	0.0019	9.8e-07	690856
rs10173720	2:27855397	IFT172	A/T	0.7842	-0.0097	0.002	9.9e-07	794985
rs12713496	2:63768467	WDPCP	T/C	0.2845	0.0093	0.0019	9.9e-07	690861
rs1607203	2:63494269	WDPCP	T/C	0.2893	0.0092	0.0019	9.9e-07	691757
rs2166494	2:63778628	WDPCP	A/T	0.7149	-0.0093	0.0019	9.9e-07	691093
rs2677439	2:63496998	WDPCP	A/G	0.2879	0.0092	0.0019	9.9e-07	691843
rs4611627	2:63517996	WDPCP	T/G	0.2905	0.0092	0.0019	9.9e-07	692108
rs2072379	16:3738887	CREBBP	T/C	0.6697	0.0091	0.0019	1e-06	691256
rs4666010	2:27878686	IFT172	T/C	0.7854	-0.0096	0.002	1e-06	794406
rs780092	2:27743154	IFT172	A/G	0.8458	-0.0107	0.0022	1e-06	795511
rs10512149	9:87179562	NTRK2	A/G	0.93814	-0.0175	0.0036	1e-06	692362
rs13284493	9:87180491	NTRK2	A/G	0.93814	-0.0175	0.0036	1e-06	692390
rs7024040	9:87183774	NTRK2	A/G	0.93808	-0.0175	0.0036	1e-06	692390
rs7024792	9:87184263	NTRK2	C/G	0.93808	-0.0175	0.0036	1e-06	692390
rs17060614	6:100895462	SIM1	T/G	0.2992	-0.0092	0.0019	1e-06	692097
rs1023820	2:63764963	WDPCP	C/G	0.7155	-0.0093	0.0019	1e-06	690870
rs11125957	2:63518472	WDPCP	A/G	0.7106	-0.0092	0.0019	1e-06	692118
rs2421881	2:63512685	WDPCP	T/C	0.2879	0.0092	0.0019	1e-06	691965
rs262472	2:63833616	WDPCP	A/G	0.7121	-0.0092	0.0019	1e-06	691207
rs2677438	2:63496076	WDPCP	C/G	0.2893	0.0092	0.0019	1e-06	691592
rs4671515	2:63768917	WDPCP	T/C	0.2845	0.0093	0.0019	1e-06	690863
rs7585664	2:63548716	WDPCP	T/C	0.713	-0.0093	0.0019	1e-06	689532
rs959195	2:63804125	WDPCP	A/G	0.7115	-0.0092	0.0019	1e-06	691501
rs9610557	22:37059389	IFT27	T/G	0.2625	0.0096	0.002	1.1e-06	680774
rs11161347	15:23948049	MAGEL2/MKRN3/NDN	A/G	0.4831	0.0085	0.0018	1.1e-06	672682
rs13177573	5:37233437	NIPBL	A/C	0.2207	-0.0102	0.0021	1.1e-06	691417
rs16903531	5:37197160	NIPBL	A/C	0.7781	0.0101	0.0021	1.1e-06	691134
rs12115349	9:87176779	NTRK2	T/G	0.93814	-0.0175	0.0036	1.1e-06	692390
rs12115549	9:87178256	NTRK2	A/G	0.93814	-0.0174	0.0036	1.1e-06	692390
rs12115843	9:87176593	NTRK2	A/C	0.06186	0.0174	0.0036	1.1e-06	692390
rs13293435	9:87178622	NTRK2	T/C	0.06186	0.0175	0.0036	1.1e-06	692390
rs17087409	9:87177629	NTRK2	A/G	0.93814	-0.0175	0.0036	1.1e-06	692358
rs1936435	9:87383777	NTRK2	A/C	0.3004	-0.0092	0.0019	1.1e-06	686240
rs4877877	9:87363424	NTRK2	C/G	0.304	-0.0092	0.0019	1.1e-06	689238
rs1044670	6:56891979	RAB23	A/G	0.148	0.0119	0.0024	1.1e-06	679842
rs1876156	6:100853996	SIM1	C/G	0.3496	0.0087	0.0018	1.1e-06	691564
rs3778037	6:100844095	SIM1	T/C	0.6502	-0.0087	0.0018	1.1e-06	692600
rs11895059	2:63601260	WDPCP	T/G	0.4405	0.0084	0.0017	1.1e-06	692373
rs1446565	2:63731575	WDPCP	T/C	0.2875	0.0092	0.0019	1.1e-06	691777
rs174485	2:63857402	WDPCP	A/G	0.7116	-0.0092	0.0019	1.1e-06	690212
rs1867847	2:63777155	WDPCP	A/G	0.7154	-0.0093	0.0019	1.1e-06	691007
rs196124	2:63854138	WDPCP	A/G	0.2884	0.0092	0.0019	1.1e-06	690583
rs2058566	2:63179076	WDPCP	A/G	0.6729	0.0089	0.0018	1.1e-06	690371
rs2421916	2:63447682	WDPCP	T/G	0.6261	0.0082	0.0017	1.1e-06	787706
rs2421952	2:63749833	WDPCP	T/C	0.2875	0.0092	0.0019	1.1e-06	691839
rs2604613	2:63832776	WDPCP	A/G	0.7121	-0.0092	0.0019	1.1e-06	691211
rs262476	2:63870607	WDPCP	T/C	0.713	-0.0092	0.0019	1.1e-06	690328
rs262493	2:63845066	WDPCP	A/C	0.7112	-0.0092	0.0019	1.1e-06	690552
rs7596446	2:63512206	WDPCP	T/C	0.2879	0.0092	0.0019	1.1e-06	684845
rs964880	2:63826932	WDPCP	A/C	0.7121	-0.0092	0.0019	1.1e-06	691276
rs16997155	22:37071533	IFT27	T/C	0.7364	-0.0096	0.002	1.2e-06	688000
rs7497973	15:23948571	MAGEL2/MKRN3/NDN	A/G	0.5162	-0.0086	0.0018	1.2e-06	663503
rs13298211	9:87192364	NTRK2	A/T	0.93884	-0.0176	0.0036	1.2e-06	691139
rs1662697	9:87395876	NTRK2	T/G	0.3012	-0.0092	0.0019	1.2e-06	684069
rs17087402	9:87175875	NTRK2	A/G	0.06186	0.0174	0.0036	1.2e-06	692386
rs17087406	9:87175996	NTRK2	A/C	0.93814	-0.0174	0.0036	1.2e-06	692390
rs12049318	1:243593660	SDCCAG8	A/C	0.1569	-0.0117	0.0024	1.2e-06	679044
rs3734353	6:100896569	SIM1	T/G	0.6999	0.0091	0.0019	1.2e-06	690001
rs10168545	2:63734284	WDPCP	A/C	0.7124	-0.0091	0.0019	1.2e-06	691729
rs10469944	2:63816672	WDPCP	C/G	0.2881	0.0091	0.0019	1.2e-06	691361
rs10469945	2:63816776	WDPCP	T/C	0.2882	0.0092	0.0019	1.2e-06	691359
rs1446569	2:63818314	WDPCP	C/G	0.2881	0.0091	0.0019	1.2e-06	691314
rs1607205	2:63500508	WDPCP	A/G	0.7107	-0.0091	0.0019	1.2e-06	691504
rs185499	2:63867523	WDPCP	T/G	0.7135	-0.0092	0.0019	1.2e-06	690404
rs2121350	2:63778919	WDPCP	A/G	0.2846	0.0093	0.0019	1.2e-06	691158
rs262473	2:63833813	WDPCP	T/G	0.7118	-0.0091	0.0019	1.2e-06	691288
rs262487	2:63880517	WDPCP	A/C	0.2881	0.0092	0.0019	1.2e-06	690341
rs2710637	2:63173450	WDPCP	A/G	0.6724	0.0089	0.0018	1.2e-06	690925
rs6546018	2:63817422	WDPCP	T/G	0.7112	-0.0091	0.0019	1.2e-06	691366
rs6546019	2:63817440	WDPCP	A/G	0.2884	0.0091	0.0019	1.2e-06	691367
rs6739804	2:63269604	WDPCP	T/C	0.3181	-0.009	0.0019	1.2e-06	687472
rs7576316	2:63741122	WDPCP	A/G	0.7124	-0.0091	0.0019	1.2e-06	691790
rs13311608	7:32999601	BBS9	A/G	0.5147	-0.0083	0.0017	1.3e-06	688219
rs3749147	2:27851918	IFT172	A/G	0.2561	-0.0096	0.002	1.3e-06	668075
rs1852029	15:23947116	MAGEL2/MKRN3/NDN	T/G	0.515	-0.0085	0.0018	1.3e-06	673355
rs10512664	5:37158123	NIPBL	A/G	0.7765	0.0102	0.0021	1.3e-06	692014
rs17087397	9:87170979	NTRK2	A/G	0.93814	-0.0173	0.0036	1.3e-06	692499
rs17087398	9:87173256	NTRK2	C/G	0.93814	-0.0174	0.0036	1.3e-06	692429
rs2083272	9:87174354	NTRK2	A/G	0.06186	0.0174	0.0036	1.3e-06	692435
rs2099670	9:87174634	NTRK2	A/G	0.93814	-0.0174	0.0036	1.3e-06	692435
rs7873566	9:87172911	NTRK2	T/C	0.93814	-0.0174	0.0036	1.3e-06	692452
rs4820307	22:38175955	SOX10	A/G	0.3111	0.0092	0.0019	1.3e-06	689437
rs1255	2:63825934	WDPCP	T/C	0.2879	0.0091	0.0019	1.3e-06	691303
rs1356388	2:63595981	WDPCP	T/C	0.4393	0.0083	0.0017	1.3e-06	692318
rs1867849	2:63726932	WDPCP	T/C	0.7125	-0.0091	0.0019	1.3e-06	691663
rs2422007	2:63780776	WDPCP	A/C	0.2889	0.0092	0.0019	1.3e-06	691056
rs262505	2:63861786	WDPCP	T/C	0.7128	-0.0091	0.0019	1.3e-06	690640
rs6546007	2:63724795	WDPCP	T/C	0.7126	-0.0092	0.0019	1.3e-06	691637
rs989527	2:63726791	WDPCP	T/G	0.7125	-0.0091	0.0019	1.3e-06	691655
rs3810813	16:3639827	CREBBP	A/G	0.06174	0.0172	0.0036	1.4e-06	780259
rs6744393	2:27750139	IFT172	T/C	0.1538	0.012	0.0025	1.4e-06	553470
rs1187362	9:87338267	NTRK2	A/T	0.6978	0.0091	0.0019	1.4e-06	685665
rs6420253	9:87381820	NTRK2	T/C	0.6909	0.0091	0.0019	1.4e-06	686580
rs7468495	9:87174162	NTRK2	A/G	0.93814	-0.0173	0.0036	1.4e-06	692409
rs7873333	9:87172710	NTRK2	T/C	0.93814	-0.0173	0.0036	1.4e-06	692454
rs893584	9:87290992	NTRK2	A/G	0.4196	-0.0084	0.0017	1.4e-06	687583
rs5756825	22:38199950	SOX10	T/C	0.448	0.0084	0.0017	1.4e-06	691470
rs10865338	2:63732509	WDPCP	A/G	0.2875	0.0091	0.0019	1.4e-06	691762
rs112194	2:63876872	WDPCP	T/G	0.2865	0.0092	0.0019	1.4e-06	690389
rs11899999	2:63601292	WDPCP	A/G	0.4401	0.0083	0.0017	1.4e-06	692563
rs1446564	2:63731682	WDPCP	A/G	0.2875	0.0091	0.0019	1.4e-06	691780
rs262483	2:63877246	WDPCP	C/G	0.7135	-0.0092	0.0019	1.4e-06	690304
rs6546009	2:63745742	WDPCP	C/G	0.7126	-0.0091	0.0019	1.4e-06	691840
rs7570031	2:63792265	WDPCP	A/G	0.2865	0.0091	0.0019	1.4e-06	691193
rs618838	11:66328719	BBS1	T/C	0.4526	0.0085	0.0018	1.5e-06	643219
rs2293445	12:49398862	KMT2D	A/G	0.3946	0.0085	0.0018	1.5e-06	690225
rs2215753	15:23945167	MAGEL2/MKRN3/NDN	T/C	0.484	0.0085	0.0018	1.5e-06	659453
rs699330	15:23936670	MAGEL2/MKRN3/NDN	T/G	0.3944	0.0088	0.0018	1.5e-06	658946
rs13295496	9:87173625	NTRK2	T/G	0.06215	0.0172	0.0036	1.5e-06	692146
rs1876157	6:100854133	SIM1	T/C	0.65	-0.0086	0.0018	1.5e-06	691575
rs1031221	2:63742810	WDPCP	T/C	0.2875	0.0091	0.0019	1.5e-06	691882
rs11693909	2:63777670	WDPCP	T/C	0.2834	0.0092	0.0019	1.5e-06	691067
rs262477	2:63870959	WDPCP	T/G	0.2864	0.0091	0.0019	1.5e-06	690413
rs262482	2:63877042	WDPCP	T/C	0.7135	-0.0091	0.0019	1.5e-06	690358
rs262484	2:63878015	WDPCP	A/G	0.2864	0.0091	0.0019	1.5e-06	690334
rs12628295	22:37062530	IFT27	C/G	0.2589	0.0094	0.002	1.6e-06	691369
rs16997141	22:37062941	IFT27	C/G	0.2622	0.0094	0.002	1.6e-06	691464
rs17279437	3:45814094	LZTFL1	A/G	0.1018	0.0134	0.0028	1.6e-06	692329
rs12658479	5:37206621	NIPBL	T/C	0.7796	0.0101	0.0021	1.6e-06	691990
rs13294681	9:87178596	NTRK2	A/T	0.06186	0.0186	0.0039	1.6e-06	677003
rs752579	17:17660347	RAI1	T/C	0.6077	0.0082	0.0017	1.6e-06	781905
rs187801	2:63867446	WDPCP	T/G	0.7135	-0.0091	0.0019	1.6e-06	690327
rs262490	2:63837651	WDPCP	A/G	0.2879	0.009	0.0019	1.6e-06	691033
rs9789351	2:63740614	WDPCP	A/G	0.2875	0.009	0.0019	1.6e-06	691763
rs12478841	2:27811722	IFT172	A/G	0.7328	0.0094	0.002	1.7e-06	689637
rs12628386	22:37062819	IFT27	T/C	0.7389	-0.0094	0.002	1.7e-06	691501
rs9607365	22:37061215	IFT27	A/C	0.2626	0.0094	0.002	1.7e-06	691952
rs9632396	5:37140331	NIPBL	T/C	0.2188	-0.0101	0.0021	1.7e-06	692600
rs12628674	22:37063016	IFT27	T/C	0.7349	-0.0094	0.002	1.8e-06	690066
rs3782357	12:49427652	KMT2D	T/C	0.394	0.0084	0.0018	1.8e-06	688634
rs1778933	9:87324411	NTRK2	T/C	0.6714	0.0088	0.0018	1.8e-06	691087
rs1936434	9:87383801	NTRK2	T/G	0.3007	-0.009	0.0019	1.8e-06	686044
rs2579375	9:87261958	NTRK2	T/C	0.1073	-0.0132	0.0028	1.8e-06	691420
rs1411578	6:57054843	RAB23	C/G	0.8428	-0.0111	0.0023	1.8e-06	690046
rs6936560	6:56896601	RAB23	A/T	0.8466	-0.0117	0.0024	1.8e-06	681946
rs4925108	17:17649423	RAI1	T/C	0.5995	0.0081	0.0017	1.8e-06	781581
rs17304906	6:101052641	SIM1	A/T	0.7494	0.0094	0.002	1.8e-06	683273
rs10176522	2:63722433	WDPCP	T/C	0.2863	0.0091	0.0019	1.8e-06	692004
rs1022351	2:63649731	WDPCP	T/C	0.4215	-0.0083	0.0017	1.8e-06	690114
rs2305157	2:63822785	WDPCP	T/C	0.2868	0.009	0.0019	1.8e-06	690633
rs13022873	2:27815510	IFT172	A/C	0.736	0.0093	0.002	1.9e-06	692594
rs8731	2:27873326	IFT172	C/G	0.7864	-0.0094	0.002	1.9e-06	794553
rs9607367	22:37061696	IFT27	A/C	0.2626	0.0094	0.002	1.9e-06	691767
rs10875913	12:49419308	KMT2D	T/C	0.6048	-0.0084	0.0018	1.9e-06	690014
rs13211871	6:100835221	SIM1	T/C	0.6479	-0.0085	0.0018	1.9e-06	692537
rs4821723	22:38300967	SOX10	A/T	0.5905	-0.0083	0.0017	1.9e-06	691141
rs6001029	22:38555193	SOX10	A/C	0.3566	0.0086	0.0018	1.9e-06	690275
rs738322	22:38569006	SOX10	A/G	0.5244	-0.0082	0.0017	1.9e-06	692449
rs12713478	2:63526336	WDPCP	T/C	0.6969	-0.0089	0.0019	1.9e-06	692388
rs1124285	16:3589846	CREBBP	A/G	0.1933	-0.0108	0.0023	2e-06	659448
rs13301591	9:87174888	NTRK2	A/G	0.06186	0.0184	0.0039	2e-06	677055
rs2051128	9:87376774	NTRK2	A/G	0.301	-0.0091	0.0019	2e-06	681033
rs17619360	6:56996466	RAB23	A/C	0.1435	0.0122	0.0026	2e-06	682076
rs2413503	22:38568944	SOX10	A/T	0.5244	-0.0082	0.0017	2e-06	692597
rs11691718	2:63524614	WDPCP	A/G	0.697	-0.0089	0.0019	2e-06	691905
rs12994711	2:63528235	WDPCP	A/G	0.697	-0.0089	0.0019	2e-06	692427
rs2030188	2:63509313	WDPCP	C/G	0.6969	-0.0089	0.0019	2e-06	692288
rs262517	2:63891261	WDPCP	T/G	0.7139	-0.009	0.0019	2e-06	691382
rs6705798	2:63259881	WDPCP	T/C	0.6744	0.0087	0.0018	2e-06	686939
rs6708847	2:63527581	WDPCP	T/C	0.3031	0.0089	0.0019	2e-06	692421
rs6709115	2:63527859	WDPCP	T/C	0.3044	0.0089	0.0019	2e-06	692397
rs6760250	2:27812252	IFT172	A/G	0.264	-0.0093	0.002	2.1e-06	692580
rs9610558	22:37061752	IFT27	A/G	0.3136	0.0089	0.0019	2.1e-06	691722
rs10875915	12:49430094	KMT2D	T/C	0.3935	0.0084	0.0018	2.1e-06	688127
rs17060530	6:100859947	SIM1	T/C	0.6492	-0.0085	0.0018	2.1e-06	692233
rs4839779	6:100832728	SIM1	A/G	0.3511	0.0084	0.0018	2.1e-06	692536
rs13422170	2:63645747	WDPCP	T/C	0.5786	0.0082	0.0017	2.1e-06	690105
rs2028887	2:63716223	WDPCP	A/G	0.2911	0.0089	0.0019	2.1e-06	691272
rs4671476	2:63524639	WDPCP	T/C	0.303	0.0089	0.0019	2.1e-06	692408
rs7591562	2:63525102	WDPCP	A/G	0.697	-0.0089	0.0019	2.1e-06	692395
rs2284002	22:37060652	IFT27	C/G	0.3134	0.0088	0.0019	2.2e-06	692478
rs7026180	9:87385256	NTRK2	A/C	0.3008	-0.009	0.0019	2.2e-06	685621
rs1395119	6:100837889	SIM1	A/T	0.3514	0.0084	0.0018	2.2e-06	692597
rs1400688	2:63538536	WDPCP	T/C	0.697	-0.0088	0.0019	2.2e-06	692319
rs1517404	2:63537557	WDPCP	A/T	0.697	-0.0088	0.0019	2.2e-06	692254
rs262502	2:63859723	WDPCP	T/C	0.2917	0.0089	0.0019	2.2e-06	690565
rs7599208	2:63622470	WDPCP	T/C	0.5596	-0.0083	0.0017	2.2e-06	679687
rs535211	11:66400480	BBS1	T/C	0.5175	0.0084	0.0018	2.3e-06	637868
rs1129003	16:30017283	KCTD13	C/G	0.07291	-0.0164	0.0035	2.3e-06	684041
rs1500004	3:46150937	LZTFL1	A/G	0.1037	0.0143	0.003	2.3e-06	651103
rs2202537	6:100833287	SIM1	A/G	0.3518	0.0084	0.0018	2.3e-06	692533
rs241812	6:100890991	SIM1	A/G	0.6971	0.0088	0.0019	2.3e-06	692311
rs3778040	6:100840380	SIM1	A/G	0.351	0.0084	0.0018	2.3e-06	692597
rs9390366	6:100864938	SIM1	T/G	0.7753	-0.0097	0.0021	2.3e-06	691291
rs6545989	2:63545267	WDPCP	A/G	0.6969	-0.0089	0.0019	2.3e-06	692350
rs7599736	2:63548856	WDPCP	T/C	0.303	0.0088	0.0019	2.3e-06	692305
rs2284001	22:37060354	IFT27	T/C	0.6864	-0.0088	0.0019	2.4e-06	692247
rs11168758	12:49245630	KMT2D	A/G	0.7186	0.0091	0.0019	2.4e-06	673165
rs12140679	1:243606691	SDCCAG8	T/G	0.1564	-0.0112	0.0024	2.4e-06	692130
rs84473	22:38557326	SOX10	T/C	0.5289	-0.0082	0.0017	2.4e-06	689417
rs10171190	2:63650794	WDPCP	T/C	0.5785	0.0082	0.0017	2.4e-06	689905
rs11675647	2:63528437	WDPCP	C/G	0.6969	-0.0088	0.0019	2.4e-06	692387
rs11684108	2:63514287	WDPCP	C/G	0.6971	-0.0088	0.0019	2.4e-06	692402
rs12713477	2:63514622	WDPCP	T/C	0.3029	0.0088	0.0019	2.4e-06	692402
rs1400687	2:63538766	WDPCP	A/C	0.3031	0.0088	0.0019	2.4e-06	692299
rs4671480	2:63547488	WDPCP	T/G	0.3031	0.0088	0.0019	2.4e-06	692342
rs6545986	2:63525117	WDPCP	A/G	0.303	0.0088	0.0019	2.4e-06	692346
rs7202271	16:30022656	KCTD13	C/G	0.07332	-0.0165	0.0035	2.5e-06	688106
rs5750547	22:38546700	SOX10	A/G	0.3563	0.0085	0.0018	2.5e-06	691551
rs5756932	22:38546118	SOX10	T/C	0.3576	0.0085	0.0018	2.5e-06	691692
rs6519091	22:38307909	SOX10	T/C	0.591	-0.0083	0.0018	2.5e-06	689994
rs10169292	2:63553235	WDPCP	T/G	0.6967	-0.0088	0.0019	2.5e-06	692235
rs10207356	2:63512015	WDPCP	T/C	0.3014	0.0088	0.0019	2.5e-06	692251
rs1400686	2:63542507	WDPCP	A/G	0.6969	-0.0088	0.0019	2.5e-06	692332
rs4671471	2:63513924	WDPCP	T/C	0.6971	-0.0088	0.0019	2.5e-06	692385
rs4671473	2:63515934	WDPCP	T/C	0.6956	-0.0088	0.0019	2.5e-06	692393
rs4671484	2:63554740	WDPCP	T/C	0.3031	0.0088	0.0019	2.5e-06	692114
rs4671506	2:63645034	WDPCP	A/G	0.5689	0.0081	0.0017	2.5e-06	689750
rs6713500	2:63529031	WDPCP	T/G	0.3031	0.0088	0.0019	2.5e-06	692402
rs6724044	2:63515755	WDPCP	T/C	0.697	-0.0088	0.0019	2.5e-06	692320
rs10875914	12:49422094	KMT2D	A/G	0.59	-0.0084	0.0018	2.6e-06	678344
rs10868231	9:87474397	NTRK2	A/G	0.7095	-0.0084	0.0018	2.6e-06	791825
rs9322033	6:100852016	SIM1	T/C	0.2237	0.0096	0.0021	2.6e-06	688321
rs2092180	22:38571563	SOX10	A/G	0.5244	-0.0081	0.0017	2.6e-06	692459
rs4383	22:38570927	SOX10	C/G	0.5248	-0.0081	0.0017	2.6e-06	692470
rs262488	2:63882179	WDPCP	T/C	0.7135	-0.0089	0.0019	2.6e-06	691502
rs262531	2:63904951	WDPCP	A/C	0.2857	0.0089	0.0019	2.6e-06	691301
rs4671470	2:63513913	WDPCP	A/G	0.6971	-0.0088	0.0019	2.6e-06	692384
rs6545991	2:63549063	WDPCP	A/G	0.3031	0.0088	0.0019	2.6e-06	692330
rs6706180	2:63530801	WDPCP	A/G	0.697	-0.0088	0.0019	2.6e-06	692308
rs6725694	2:63510902	WDPCP	C/G	0.6971	-0.0088	0.0019	2.6e-06	692291
rs7558922	2:63548692	WDPCP	A/G	0.3031	0.0088	0.0019	2.6e-06	692336
rs7559137	2:63548868	WDPCP	A/C	0.3031	0.0088	0.0019	2.6e-06	692336
rs1573219	9:87387622	NTRK2	A/G	0.303	-0.0089	0.0019	2.7e-06	685982
rs7038866	9:87387907	NTRK2	A/G	0.3008	-0.0089	0.0019	2.7e-06	684976
rs1517405	2:63515568	WDPCP	T/C	0.6971	-0.0087	0.0019	2.7e-06	692326
rs262537	2:63907331	WDPCP	T/C	0.7145	-0.009	0.0019	2.7e-06	685441
rs6744720	2:63521033	WDPCP	T/G	0.697	-0.0087	0.0019	2.7e-06	692376
rs7606045	2:63826528	WDPCP	T/G	0.2918	0.0088	0.0019	2.7e-06	691182
rs540874	11:66329732	BBS1	A/G	0.4452	0.0081	0.0017	2.8e-06	692477
rs11703267	22:41646738	EP300	A/G	0.5436	0.0081	0.0017	2.8e-06	692453
rs11168839	12:49457635	KMT2D	A/G	0.3963	0.0083	0.0018	2.8e-06	688731
rs2304275	12:49442813	KMT2D	T/C	0.699	-0.0092	0.002	2.8e-06	628516
rs1539676	9:87390167	NTRK2	T/C	0.3008	-0.0089	0.0019	2.8e-06	684536
rs7551067	1:243606579	SDCCAG8	A/T	0.1559	-0.0111	0.0024	2.8e-06	680291
rs9403740	6:100842895	SIM1	T/C	0.35	0.0085	0.0018	2.8e-06	680857
rs4382	22:38570842	SOX10	T/C	0.5244	-0.0081	0.0017	2.8e-06	692488
rs12713486	2:63557809	WDPCP	T/C	0.5461	-0.008	0.0017	2.8e-06	691835
rs262506	2:63863022	WDPCP	A/G	0.2881	0.0096	0.002	2.8e-06	527366
rs4671481	2:63547527	WDPCP	A/G	0.3031	0.0087	0.0019	2.8e-06	692319
rs4671495	2:63607943	WDPCP	T/G	0.546	-0.008	0.0017	2.8e-06	692068
rs6708627	2:63543926	WDPCP	A/G	0.3031	0.0087	0.0019	2.8e-06	692350
rs1671064	11:66327673	BBS1	A/G	0.5547	-0.0081	0.0017	2.9e-06	692553
rs139516	22:41657705	EP300	A/G	0.4567	-0.0081	0.0017	2.9e-06	691050
rs6702894	1:243608642	SDCCAG8	A/G	0.7878	0.0098	0.0021	2.9e-06	691194
rs4821724	22:38315469	SOX10	T/C	0.4132	0.0082	0.0018	2.9e-06	683707
rs4671474	2:63516104	WDPCP	A/C	0.6971	-0.0087	0.0019	2.9e-06	692344
rs6734468	2:63530569	WDPCP	A/C	0.303	0.0087	0.0019	2.9e-06	690897
rs10747561	12:49500509	KMT2D	T/C	0.3433	0.0085	0.0018	3e-06	689528
rs1517401	2:63540707	WDPCP	A/G	0.3032	0.0087	0.0019	3e-06	692317
rs166385	2:63888023	WDPCP	A/T	0.7282	-0.0093	0.002	3e-06	683063
rs2421882	2:63556849	WDPCP	T/G	0.5461	-0.008	0.0017	3e-06	691685
rs1984584	22:41684426	EP300	A/G	0.455	-0.0081	0.0017	3.1e-06	690999
rs9390335	6:100830493	SIM1	T/C	0.6486	-0.0083	0.0018	3.1e-06	692051
rs9622746	22:38564041	SOX10	C/G	0.6416	-0.0085	0.0018	3.1e-06	689869
rs10164844	2:63652403	WDPCP	T/C	0.4138	-0.0081	0.0017	3.1e-06	689923
rs2421885	2:63577041	WDPCP	A/G	0.5464	-0.008	0.0017	3.1e-06	692401
rs2421886	2:63579312	WDPCP	T/C	0.3033	0.0087	0.0019	3.1e-06	691979
rs262470	2:63830559	WDPCP	T/C	0.7118	-0.0095	0.002	3.1e-06	527237
rs6723088	2:63916826	WDPCP	T/C	0.3614	-0.0084	0.0018	3.1e-06	684093
rs678397	11:66324583	BBS1	T/C	0.4581	0.0081	0.0017	3.2e-06	686722
rs11168854	12:49485373	KMT2D	C/G	0.6348	-0.008	0.0017	3.2e-06	791378
rs2490392	1:243462523	SDCCAG8	A/G	0.8272	0.0108	0.0023	3.2e-06	691026
rs9403711	6:100824183	SIM1	A/G	0.2254	0.0095	0.002	3.2e-06	692606
rs9403718	6:100827450	SIM1	T/C	0.7733	-0.0095	0.002	3.2e-06	692425
rs3171656	22:38172213	SOX10	A/G	0.311	0.0088	0.0019	3.2e-06	692330
rs2176417	2:63578594	WDPCP	C/G	0.6952	-0.0087	0.0019	3.2e-06	691791
rs2421891	2:63652804	WDPCP	T/C	0.4144	-0.0081	0.0017	3.2e-06	681796
rs7561802	2:63562066	WDPCP	T/C	0.6969	-0.0087	0.0019	3.2e-06	691535
rs509556	11:66326362	BBS1	A/G	0.4552	0.008	0.0017	3.3e-06	692437
rs677488	11:66324762	BBS1	T/C	0.5445	-0.008	0.0017	3.3e-06	692582
rs3790113	16:56384720	BBS2	T/C	0.6583	-0.0081	0.0017	3.3e-06	785953
rs11860782	16:29989739	KCTD13	A/G	0.92686	0.0164	0.0035	3.3e-06	679675
rs133012	22:38570721	SOX10	A/G	0.475	0.008	0.0017	3.3e-06	690904
rs11691357	2:63561449	WDPCP	A/G	0.3031	0.0087	0.0019	3.3e-06	691868
rs139515	22:41656133	EP300	A/G	0.5432	0.0081	0.0017	3.4e-06	691417
rs139519	22:41660410	EP300	C/G	0.5446	0.0081	0.0017	3.4e-06	690609
rs3798499	6:100864829	SIM1	T/C	0.6488	-0.0084	0.0018	3.4e-06	690399
rs2235347	22:38522887	SOX10	A/G	0.558	-0.0082	0.0018	3.4e-06	691883
rs2285179	22:38211954	SOX10	A/G	0.5515	-0.0081	0.0017	3.4e-06	685568
rs11686044	2:63561332	WDPCP	T/G	0.3031	0.0087	0.0019	3.4e-06	691917
rs2176416	2:63590255	WDPCP	A/G	0.3031	0.0087	0.0019	3.4e-06	691596
rs2699389	2:63494931	WDPCP	A/G	0.2893	0.0095	0.002	3.4e-06	535537
rs2951192	2:63502533	WDPCP	A/T	0.2894	0.0095	0.002	3.4e-06	528742
rs6545997	2:63562146	WDPCP	A/C	0.3067	0.0087	0.0019	3.4e-06	691913
rs6717060	2:63568608	WDPCP	A/G	0.6953	-0.0087	0.0019	3.4e-06	691731
rs139526	22:41667727	EP300	A/G	0.5529	0.0081	0.0017	3.5e-06	689772
rs133021	22:38573338	SOX10	T/C	0.5236	-0.008	0.0017	3.5e-06	691544
rs75387	22:38572057	SOX10	T/C	0.4757	0.008	0.0017	3.5e-06	691732
rs10209490	2:63651996	WDPCP	A/G	0.4147	-0.008	0.0017	3.5e-06	690141
rs1878507	2:63573411	WDPCP	T/C	0.5465	-0.008	0.0017	3.5e-06	691640
rs4671496	2:63607980	WDPCP	C/G	0.546	-0.008	0.0017	3.5e-06	692012
rs2587888	16:56347472	BBS2	T/G	0.4992	0.0081	0.0018	3.6e-06	674682
rs2601794	16:3989332	CREBBP	T/C	0.94715	0.0172	0.0037	3.6e-06	622720
rs7958241	12:49509262	KMT2D	A/G	0.6529	-0.0084	0.0018	3.6e-06	688287
rs1100806	15:23942935	MAGEL2/MKRN3/NDN	A/G	0.5676	-0.0089	0.0019	3.6e-06	512067
rs11398	6:57053947	RAB23	T/C	0.8428	-0.0109	0.0023	3.6e-06	677725
rs1517409	2:63575082	WDPCP	A/G	0.3037	0.0086	0.0019	3.6e-06	691907
rs2421892	2:63653103	WDPCP	C/G	0.5859	0.0081	0.0017	3.6e-06	690007
rs2539978	2:63195179	WDPCP	T/C	0.3341	-0.0085	0.0018	3.6e-06	690101
rs6718198	2:63584129	WDPCP	T/C	0.5465	-0.008	0.0017	3.6e-06	692022
rs17706100	2:27876666	IFT172	T/G	0.95644	0.019	0.0041	3.7e-06	769778
rs1546393	6:100849730	SIM1	T/C	0.3502	0.0084	0.0018	3.7e-06	680117
rs13053681	22:38460285	SOX10	C/G	0.2891	-0.0089	0.0019	3.7e-06	690861
rs132941	22:38545942	SOX10	T/C	0.5555	-0.008	0.0017	3.7e-06	690108
rs1488831	11:27637014	BDNF	T/G	0.06051	0.0158	0.0034	3.8e-06	787580
rs814295	2:27743215	IFT172	A/G	0.8431	-0.01	0.0022	3.8e-06	795249
rs2117029	12:49408440	KMT2D	A/T	0.6047	-0.0082	0.0018	3.8e-06	688544
rs5750549	22:38547172	SOX10	T/C	0.3561	0.0083	0.0018	3.8e-06	691299
rs12988024	2:63585304	WDPCP	A/C	0.5464	-0.0079	0.0017	3.8e-06	692022
rs470112	22:41652345	EP300	C/G	0.5454	0.008	0.0017	3.9e-06	691741
rs12144227	1:243604964	SDCCAG8	C/G	0.1559	-0.0111	0.0024	3.9e-06	680407
rs133016	22:38572582	SOX10	T/C	0.4748	0.008	0.0017	3.9e-06	691723
rs133017	22:38572637	SOX10	A/C	0.5243	-0.008	0.0017	3.9e-06	691721
rs6545988	2:63542732	WDPCP	A/C	0.3083	0.0087	0.0019	3.9e-06	685240
rs6546002	2:63593829	WDPCP	A/C	0.3052	0.0086	0.0019	3.9e-06	690361
rs572846	11:66331458	BBS1	A/G	0.4557	0.0079	0.0017	4e-06	691609
rs139498	22:41644234	EP300	C/G	0.4547	-0.0081	0.0018	4e-06	688623
rs941444	17:17693891	RAI1	C/G	0.3887	-0.0083	0.0018	4e-06	691985
rs11705616	22:38180487	SOX10	T/G	0.3106	0.0087	0.0019	4e-06	689597
rs7481229	11:8313789	TUB	A/C	0.2788	-0.009	0.002	4e-06	685024
rs4930387	11:66449905	BBS1	A/G	0.4793	-0.0079	0.0017	4.1e-06	690312
rs139525	22:41664942	EP300	A/G	0.4481	-0.008	0.0017	4.2e-06	689964
rs3827351	22:37157240	IFT27	A/C	0.7301	0.009	0.002	4.2e-06	691952
rs5756845	22:38263198	SOX10	T/C	0.5907	-0.008	0.0017	4.2e-06	692103
rs2699390	2:63494848	WDPCP	T/C	0.7107	-0.0094	0.002	4.2e-06	528576
rs139507	22:41651467	EP300	T/C	0.5452	0.008	0.0017	4.3e-06	690767
rs6001027	22:38545619	SOX10	A/G	0.6428	-0.0078	0.0017	4.3e-06	794128
rs713891	22:38312727	SOX10	T/G	0.4135	0.0081	0.0018	4.3e-06	689673
rs262521	2:63892485	WDPCP	A/G	0.7279	-0.0088	0.0019	4.3e-06	691892
rs6559829	9:87393013	NTRK2	T/C	0.6941	0.0087	0.0019	4.4e-06	684380
rs4385	22:38573229	SOX10	T/C	0.5362	-0.0079	0.0017	4.4e-06	690627
rs11125967	2:63584792	WDPCP	A/G	0.3032	0.0086	0.0019	4.4e-06	691589
rs262508	2:63885280	WDPCP	C/G	0.7279	-0.0089	0.0019	4.4e-06	690649
rs2699391	2:63494107	WDPCP	T/C	0.2878	0.0094	0.002	4.4e-06	528501
rs4671061	2:63653816	WDPCP	T/C	0.414	-0.008	0.0017	4.4e-06	689943
rs4671494	2:63604998	WDPCP	T/C	0.695	-0.0086	0.0019	4.4e-06	690210
rs2899293	22:38242813	SOX10	A/G	0.5904	-0.008	0.0017	4.5e-06	692140
rs5750504	22:38243675	SOX10	A/T	0.4105	0.008	0.0017	4.5e-06	692368
rs6546001	2:63593819	WDPCP	A/G	0.3037	0.0086	0.0019	4.5e-06	690289
rs1048015	22:37163080	IFT27	T/C	0.731	0.009	0.002	4.6e-06	692264
rs1475995	22:37159393	IFT27	T/C	0.7313	0.009	0.002	4.6e-06	692191
rs139857	22:38292974	SOX10	T/C	0.5904	-0.008	0.0017	4.6e-06	692428
rs10209822	2:63572447	WDPCP	T/G	0.3032	0.0086	0.0019	4.6e-06	691813
rs1022353	2:63652198	WDPCP	T/G	0.4143	-0.008	0.0017	4.6e-06	690161
rs2176418	2:63575792	WDPCP	T/C	0.3033	0.0085	0.0019	4.6e-06	691866
rs262479	2:63872479	WDPCP	T/C	0.7136	-0.0094	0.002	4.6e-06	527336
rs6731136	2:63647909	WDPCP	T/C	0.4143	-0.008	0.0017	4.6e-06	690053
rs2550299	16:56380593	BBS2	C/G	0.6562	-0.008	0.0017	4.8e-06	788703
rs1387144	11:27635319	BDNF	A/C	0.5938	0.0076	0.0017	4.8e-06	792607
rs11861842	16:30094180	KCTD13	T/C	0.06952	-0.0161	0.0035	4.8e-06	690688
rs3026688	22:38463141	SOX10	A/C	0.2893	-0.0088	0.0019	4.8e-06	691022
rs6000905	22:38241432	SOX10	A/G	0.4094	0.008	0.0017	4.8e-06	692329
rs2422011	2:63774989	WDPCP	A/G	0.2847	0.0084	0.0018	4.8e-06	777710
rs9896162	17:56147958	MKS1	T/C	0.3551	0.0083	0.0018	4.9e-06	690204
rs10484410	6:56996688	RAB23	T/C	0.8567	-0.0112	0.0024	4.9e-06	692308
rs139842	22:38272929	SOX10	T/C	0.4098	0.008	0.0017	4.9e-06	692528
rs11894445	2:63592348	WDPCP	A/G	0.3037	0.0085	0.0019	4.9e-06	690325
rs2090479	2:63529861	WDPCP	T/G	0.3031	0.0085	0.0019	4.9e-06	692428
rs13011799	2:63597250	WDPCP	T/C	0.3036	0.0085	0.0019	5e-06	690333
rs7558796	2:63597108	WDPCP	A/T	0.6964	-0.0085	0.0019	5e-06	690344
rs932172	2:63602897	WDPCP	T/C	0.3036	0.0085	0.0019	5e-06	690378
rs1791684	11:66369211	BBS1	T/G	0.4857	-0.0086	0.0019	5.1e-06	521966
rs560556	11:66338118	BBS1	A/G	0.4545	0.0079	0.0017	5.1e-06	690972
rs12148974	16:4035499	CREBBP	A/C	0.112	-0.013	0.0028	5.1e-06	671874
rs4788186	16:29841225	KCTD13	A/G	0.3975	-0.0082	0.0018	5.1e-06	671309
rs3741621	12:49494025	KMT2D	T/C	0.6577	-0.0084	0.0018	5.1e-06	688750
rs2421887	2:63606219	WDPCP	T/C	0.3035	0.0085	0.0019	5.1e-06	690362
rs4327428	3:45809329	LZTFL1	A/C	0.1147	0.0121	0.0027	5.2e-06	691535
rs7756421	6:57034009	RAB23	A/G	0.8553	-0.0111	0.0024	5.2e-06	692235
rs908622	2:63579685	WDPCP	T/C	0.3049	0.0085	0.0019	5.2e-06	691686
rs10003827	4:123730853	BBS12	T/C	0.8758	-0.0124	0.0027	5.3e-06	688004
rs8049837	16:30089438	KCTD13	T/C	0.0715	-0.0161	0.0035	5.3e-06	689174
rs2284063	22:38544298	SOX10	A/G	0.6419	-0.0077	0.0017	5.3e-06	794995
rs929105	22:38258429	SOX10	A/G	0.5917	-0.008	0.0018	5.3e-06	686588
rs10209140	2:63922369	WDPCP	A/G	0.3623	-0.0081	0.0018	5.3e-06	692415
rs4671479	2:63545598	WDPCP	A/T	0.3031	0.0091	0.002	5.3e-06	536243
rs7355671	2:63592499	WDPCP	T/C	0.5462	-0.0079	0.0017	5.3e-06	686208
rs17244217	11:27791110	BDNF	T/G	0.2648	0.0089	0.002	5.4e-06	677654
rs2292795	2:63605430	WDPCP	A/G	0.3036	0.0085	0.0019	5.4e-06	690238
rs2901580	2:63606274	WDPCP	T/C	0.6965	-0.0085	0.0019	5.4e-06	690352
rs6459178	6:56954518	RAB23	A/C	0.8551	-0.0115	0.0025	5.5e-06	637559
rs9403728	6:100831568	SIM1	A/C	0.6484	-0.0082	0.0018	5.5e-06	680830
rs5750495	22:38179120	SOX10	A/T	0.685	-0.0085	0.0019	5.5e-06	687681
rs10167849	2:63598639	WDPCP	A/G	0.5437	-0.0078	0.0017	5.5e-06	692145
rs12618974	2:63607443	WDPCP	T/C	0.3035	0.0085	0.0019	5.5e-06	690260
rs104974	22:41651034	EP300	A/G	0.4545	-0.0079	0.0017	5.6e-06	691573
rs17060480	6:100836636	SIM1	A/T	0.7745	-0.0093	0.002	5.6e-06	688837
rs2295596	6:100834674	SIM1	T/C	0.2254	0.0093	0.002	5.6e-06	688816
rs5756843	22:38258810	SOX10	T/C	0.4093	0.0079	0.0017	5.6e-06	692300
rs11883730	2:63592230	WDPCP	T/G	0.6948	-0.0085	0.0019	5.6e-06	690386
rs1348806	2:63895884	WDPCP	A/T	0.272	0.0087	0.0019	5.6e-06	691983
rs2121353	2:63899330	WDPCP	T/C	0.728	-0.0087	0.0019	5.6e-06	691951
rs2592386	2:63894064	WDPCP	A/G	0.272	0.0087	0.0019	5.6e-06	692029
rs7571697	2:63597605	WDPCP	A/G	0.3036	0.0085	0.0019	5.6e-06	690330
rs3798511	6:100852753	SIM1	T/C	0.92019	-0.0143	0.0031	5.7e-06	692149
rs713991	22:38426043	SOX10	A/G	0.4363	0.0079	0.0017	5.7e-06	690479
rs262510	2:63886712	WDPCP	A/C	0.2721	0.0087	0.0019	5.8e-06	691833
rs3888741	22:37066456	IFT27	T/G	0.3006	0.0086	0.0019	5.9e-06	669352
rs6519030	22:37059353	IFT27	T/C	0.6859	-0.0085	0.0019	5.9e-06	691578
rs13055462	22:38184685	SOX10	A/G	0.689	-0.0085	0.0019	5.9e-06	689322
rs2292794	2:63605772	WDPCP	A/G	0.3035	0.0085	0.0019	5.9e-06	690337
rs908621	2:63606042	WDPCP	T/C	0.6965	-0.0085	0.0019	5.9e-06	690337
rs5750307	22:37170977	IFT27	T/C	0.7309	0.0089	0.002	6e-06	691960
rs4840130	6:100833142	SIM1	T/C	0.2254	0.0093	0.002	6e-06	688837
rs4671488	2:63567514	WDPCP	T/C	0.6928	-0.0091	0.002	6e-06	527753
rs5758211	22:41466229	EP300	T/C	0.7816	0.0095	0.0021	6.1e-06	691991
rs2742396	3:45819701	LZTFL1	T/C	0.3386	0.0087	0.0019	6.1e-06	661251
rs10783299	12:49390677	KMT2D	T/C	0.6036	-0.0077	0.0017	6.2e-06	746435
rs7355552	2:63594650	WDPCP	T/C	0.5448	-0.0078	0.0017	6.2e-06	692124
rs12276167	11:27635571	BDNF	T/G	0.4103	-0.0075	0.0017	6.3e-06	790006
rs10747562	12:49505184	KMT2D	T/C	0.3513	0.0082	0.0018	6.3e-06	689281
rs9610864	22:38286144	SOX10	T/C	0.4083	0.0079	0.0017	6.3e-06	692478
rs13028443	2:63603717	WDPCP	T/C	0.5444	-0.0078	0.0017	6.3e-06	692076
rs1468748	2:63204611	WDPCP	T/C	0.671	0.0083	0.0018	6.3e-06	689137
rs3891400	4:123736349	BBS12	T/G	0.8777	-0.0123	0.0027	6.4e-06	688812
rs9386123	6:100824140	SIM1	T/C	0.2254	0.0092	0.002	6.4e-06	688959
rs9390332	6:100830259	SIM1	A/T	0.7746	-0.0092	0.002	6.4e-06	688802
rs3788533	22:38523246	SOX10	C/G	0.471	-0.0079	0.0018	6.4e-06	685738
rs171902	2:63903236	WDPCP	T/C	0.728	-0.0087	0.0019	6.4e-06	691836
rs2587889	16:56348046	BBS2	T/G	0.5288	0.0079	0.0017	6.5e-06	677614
rs5750306	22:37170915	IFT27	T/C	0.7305	0.0088	0.002	6.5e-06	691931
rs9386193	6:101043798	SIM1	A/G	0.5841	0.0079	0.0017	6.5e-06	687545
rs129336	22:37155457	IFT27	A/C	0.268	-0.0088	0.002	6.6e-06	692642
rs9376947	6:100825490	SIM1	A/G	0.7743	-0.0092	0.002	6.6e-06	688890
rs1922421	2:63592792	WDPCP	A/G	0.6932	-0.0084	0.0019	6.6e-06	690177
rs4671507	2:63645377	WDPCP	C/G	0.5816	0.0078	0.0017	6.6e-06	690580
rs2126986	16:56351707	BBS2	A/G	0.5239	0.0078	0.0017	6.7e-06	678730
rs10868213	9:87221357	NTRK2	A/C	0.8347	0.0099	0.0022	6.7e-06	792283
rs12145833	1:243483754	SDCCAG8	T/G	0.8435	0.0108	0.0024	6.7e-06	690697
rs1506081	6:100825035	SIM1	A/G	0.6483	-0.0081	0.0018	6.7e-06	680700
rs3778036	6:100844105	SIM1	T/C	0.92025	-0.0141	0.0031	6.7e-06	692150
rs4578846	2:63554859	WDPCP	T/C	0.3031	0.0091	0.002	6.7e-06	528796
rs1506084	6:100813188	SIM1	A/G	0.3582	0.008	0.0018	6.8e-06	686580
rs4786450	16:4036155	CREBBP	T/C	0.7249	-0.009	0.002	6.9e-06	641850
rs1212171	9:87282527	NTRK2	T/C	0.5689	0.0078	0.0017	6.9e-06	690796
rs6723875	2:63911500	WDPCP	T/C	0.2949	-0.0085	0.0019	6.9e-06	683616
rs11079348	17:56438624	MKS1	T/G	0.1746	-0.0103	0.0023	7e-06	690713
rs11687234	2:63634407	WDPCP	A/C	0.5816	0.0078	0.0017	7.1e-06	691990
rs1187353	9:87293253	NTRK2	A/G	0.4323	-0.0078	0.0017	7.2e-06	687118
rs12618946	2:63353041	WDPCP	A/G	0.3401	-0.0082	0.0018	7.2e-06	683987
rs262478	2:63872386	WDPCP	T/C	0.2853	0.0092	0.002	7.2e-06	527247
rs12713491	2:63604320	WDPCP	A/C	0.5444	-0.0077	0.0017	7.3e-06	691993
rs7225351	17:56155011	MKS1	A/G	0.6434	-0.0081	0.0018	7.4e-06	692549
rs4840129	6:100826119	SIM1	T/C	0.3546	0.0081	0.0018	7.4e-06	680499
rs12713490	2:63603463	WDPCP	A/G	0.5443	-0.0077	0.0017	7.4e-06	691998
rs1659414	9:87270571	NTRK2	T/C	0.4324	-0.0078	0.0017	7.5e-06	690284
rs139850	22:38280311	SOX10	C/G	0.5938	-0.0086	0.0019	7.5e-06	676061
rs3026677	22:38432725	SOX10	C/G	0.4369	0.0078	0.0017	7.5e-06	690682
rs10515157	17:56433448	MKS1	A/G	0.1779	-0.0102	0.0023	7.6e-06	692506
rs4313961	2:63554849	WDPCP	T/C	0.6956	-0.0091	0.002	7.6e-06	525103
rs993315	9:87287721	NTRK2	T/C	0.4305	-0.0077	0.0017	7.7e-06	691746
rs12190575	6:56920804	RAB23	A/G	0.8573	-0.011	0.0025	7.7e-06	691032
rs9403723	6:100830435	SIM1	C/G	0.6482	-0.0081	0.0018	7.7e-06	680738
rs4820317	22:38543287	SOX10	T/C	0.6374	-0.008	0.0018	7.7e-06	689611
rs1829259	2:63590646	WDPCP	T/C	0.5465	-0.0077	0.0017	7.7e-06	690720
rs12478262	2:63626556	WDPCP	T/G	0.4183	-0.0077	0.0017	7.8e-06	691723
rs8142174	22:38427963	SOX10	A/G	0.5632	-0.0078	0.0017	7.9e-06	690618
rs2283492	16:4037525	CREBBP	T/C	0.2674	0.0089	0.002	8e-06	656782
rs17060562	6:100870786	SIM1	T/C	0.96632	-0.0215	0.0048	8e-06	690374
rs1187349	9:87295571	NTRK2	A/G	0.4329	-0.0078	0.0017	8.1e-06	685235
rs1209068	9:87340518	NTRK2	T/C	0.1719	-0.0103	0.0023	8.1e-06	688082
rs7771115	6:56961521	RAB23	A/G	0.8563	-0.0113	0.0025	8.1e-06	638161
rs932171	2:63602942	WDPCP	A/G	0.3051	0.0083	0.0019	8.1e-06	690342
rs7130131	11:27662826	BDNF	T/C	0.94136	-0.0152	0.0034	8.2e-06	782822
rs4821997	22:41464541	EP300	T/C	0.2188	-0.0093	0.0021	8.2e-06	691599
rs171901	2:63901700	WDPCP	C/G	0.272	0.0086	0.0019	8.2e-06	691544
rs2276138	11:66456387	BBS1	T/C	0.4809	-0.0077	0.0017	8.4e-06	691789
rs4671472	2:63515912	WDPCP	A/C	0.6971	-0.009	0.002	8.4e-06	529059
rs7484168	11:8316829	TUB	A/C	0.5499	-0.0078	0.0018	8.5e-06	684328
rs2158460	17:56432362	MKS1	C/G	0.825	0.0101	0.0023	8.6e-06	692504
rs13409031	2:63645846	WDPCP	A/G	0.4111	-0.0077	0.0017	8.6e-06	690833
rs12625436	20:57445213	GNAS	A/G	0.3944	0.008	0.0018	8.7e-06	680762
rs1201363	9:87268759	NTRK2	T/C	0.5624	0.0077	0.0017	8.8e-06	689673
rs1837304	9:87250605	NTRK2	A/C	0.45	-0.0077	0.0017	8.8e-06	691982
rs1348804	2:63895672	WDPCP	T/C	0.6968	-0.0087	0.0019	8.8e-06	636951
rs5995990	22:41462730	EP300	T/C	0.7821	0.0093	0.0021	8.9e-06	691925
rs1543692	9:87269223	NTRK2	A/G	0.4348	-0.0077	0.0017	8.9e-06	689737
rs12675038	8:117706218	RAD21	T/C	0.8855	0.0113	0.0025	8.9e-06	794582
rs6519095	22:38431917	SOX10	A/G	0.5624	-0.0077	0.0017	9e-06	690891
rs10182596	2:63550192	WDPCP	A/G	0.3031	0.009	0.002	9e-06	528921
rs1829261	2:63587157	WDPCP	A/G	0.306	0.0083	0.0019	9e-06	691218
rs2072339	16:4039716	CREBBP	A/C	0.7901	0.0096	0.0022	9.1e-06	678566
rs1187329	9:87289280	NTRK2	A/G	0.4302	-0.0077	0.0017	9.1e-06	691969
rs17060460	6:100827834	SIM1	A/G	0.7754	-0.0091	0.0021	9.1e-06	687333
rs2138791	2:63654724	WDPCP	C/G	0.4106	-0.0077	0.0017	9.1e-06	690093
rs1547226	6:57057183	RAB23	T/C	0.18	0.0102	0.0023	9.3e-06	685694
rs3818717	17:17707105	RAI1	T/C	0.4259	-0.0078	0.0018	9.4e-06	683243
rs486584	11:66358126	BBS1	T/C	0.5162	0.0076	0.0017	9.5e-06	692588
rs8138294	22:37068729	IFT27	T/C	0.6981	-0.0084	0.0019	9.5e-06	687484
rs262536	2:63906926	WDPCP	T/C	0.2719	0.0085	0.0019	9.5e-06	689577
rs4671522	2:63844917	WDPCP	A/C	0.7554	0.0088	0.002	9.6e-06	691287
rs6741817	2:63602975	WDPCP	A/G	0.3051	0.0083	0.0019	9.6e-06	690367
rs580910	11:66402333	BBS1	T/C	0.5175	0.0076	0.0017	9.7e-06	692213
rs1857414	9:87262503	NTRK2	A/G	0.431	-0.0077	0.0017	9.7e-06	688960
rs3778038	6:100841229	SIM1	T/G	0.3517	0.008	0.0018	9.7e-06	679914
rs17811450	8:117741913	RAD21	T/C	0.7463	0.0087	0.002	9.8e-06	691207
rs9818982	3:45812514	LZTFL1	A/G	0.1148	0.0118	0.0027	9.9e-06	690982
rs2178678	2:63646009	WDPCP	A/T	0.5892	0.0077	0.0017	9.9e-06	690298
rs498045	11:66362997	BBS1	A/G	0.4835	-0.0076	0.0017	1e-05	692540
rs692892	11:66348503	BBS1	T/C	0.5158	0.0076	0.0017	1e-05	691755
rs7927728	11:27667472	BDNF	A/G	0.05794	0.015	0.0034	1e-05	783103
rs2802727	1:243483326	SDCCAG8	T/C	0.843	0.0106	0.0024	1e-05	691230
rs5995529	22:38415721	SOX10	T/C	0.5804	-0.0077	0.0018	1e-05	688626
rs262527	2:63900292	WDPCP	C/G	0.728	-0.0081	0.0018	1e-05	783560
rs503250	11:66372066	BBS1	T/C	0.5171	0.0076	0.0017	1.1e-05	691549
rs556759	11:66372390	BBS1	T/C	0.5169	0.0075	0.0017	1.1e-05	692162
rs12493471	3:45951678	LZTFL1	T/C	0.3534	-0.0081	0.0018	1.1e-05	672985
rs1722793	15:23949665	MAGEL2/MKRN3/NDN	T/C	0.6207	-0.0081	0.0018	1.1e-05	672339
rs13414	17:56431453	MKS1	A/G	0.8245	0.01	0.0023	1.1e-05	692216
rs7822206	8:117718976	RAD21	A/G	0.2556	-0.0087	0.002	1.1e-05	691280
rs12945601	17:17653411	RAI1	T/C	0.4004	-0.0078	0.0018	1.1e-05	685392
rs1889014	17:17767165	RAI1	T/C	0.5944	0.0078	0.0018	1.1e-05	690475
rs10926986	1:243467611	SDCCAG8	T/G	0.1567	-0.0105	0.0024	1.1e-05	691322
rs1568174	2:63625608	WDPCP	A/C	0.5814	0.0076	0.0017	1.1e-05	691396
rs262528	2:63903367	WDPCP	T/C	0.728	-0.0085	0.0019	1.1e-05	691815
rs6546003	2:63625819	WDPCP	T/C	0.4183	-0.0076	0.0017	1.1e-05	691433
rs474602	11:66414818	BBS1	A/T	0.518	0.0075	0.0017	1.2e-05	685764
rs2746967	22:37066489	IFT27	A/C	0.6983	-0.0083	0.0019	1.2e-05	675904
rs3847766	12:49637566	KMT2D	A/T	0.2706	0.0085	0.0019	1.2e-05	691014
rs7978448	12:49506940	KMT2D	C/G	0.3417	0.008	0.0018	1.2e-05	683681
rs726433	9:87247336	NTRK2	T/C	0.1085	-0.0122	0.0028	1.2e-05	691759
rs10926984	1:243462153	SDCCAG8	T/G	0.8434	0.0105	0.0024	1.2e-05	691232
rs12470121	2:63633443	WDPCP	A/G	0.4187	-0.0071	0.0016	1.2e-05	795505
rs6736411	2:63674060	WDPCP	A/G	0.714	-0.0085	0.0019	1.2e-05	670097
rs12577111	11:66438074	BBS1	A/G	0.4823	-0.0075	0.0017	1.3e-05	692334
rs2877877	17:56431530	MKS1	A/G	0.8247	0.0102	0.0023	1.3e-05	638082
rs1359721	9:87119854	NTRK2	A/G	0.98252	0.0258	0.0059	1.3e-05	657774
rs17087472	9:87246051	NTRK2	A/G	0.8903	0.0121	0.0028	1.3e-05	691735
rs7468983	9:87247277	NTRK2	T/C	0.1085	-0.0122	0.0028	1.3e-05	691785
rs8074074	17:17407816	RAI1	T/C	0.7384	0.009	0.0021	1.3e-05	632859
rs5756853	22:38329524	SOX10	A/G	0.3714	0.0079	0.0018	1.3e-05	690306
rs10840013	11:8326776	TUB	A/T	0.3904	0.0078	0.0018	1.3e-05	686257
rs2539980	2:63208460	WDPCP	T/C	0.3196	-0.008	0.0018	1.3e-05	692118
rs4401397	3:45671401	LZTFL1	T/C	0.6435	0.0078	0.0018	1.4e-05	682740
rs11140706	9:87248648	NTRK2	A/C	0.5508	0.0075	0.0017	1.4e-05	692552
rs1187367	9:87256030	NTRK2	T/C	0.4487	-0.0075	0.0017	1.4e-05	691491
rs6901192	6:56862310	RAB23	C/G	0.7843	-0.009	0.0021	1.4e-05	691946
rs4821747	22:38538856	SOX10	T/C	0.6382	-0.0078	0.0018	1.4e-05	689862
rs10840011	11:8326607	TUB	A/G	0.5956	-0.0076	0.0018	1.4e-05	686776
rs2901581	2:63630117	WDPCP	T/C	0.5848	0.0075	0.0017	1.4e-05	691757
rs1815739	11:66328095	BBS1	T/C	0.4401	0.0077	0.0018	1.5e-05	643484
rs2070107	17:56423201	MKS1	C/G	0.1753	-0.0099	0.0023	1.5e-05	690672
rs1837305	9:87247694	NTRK2	A/G	0.1085	-0.0121	0.0028	1.5e-05	691824
rs1926744	9:87110551	NTRK2	A/T	0.94218	-0.0159	0.0037	1.5e-05	689074
rs2072859	22:38322350	SOX10	T/C	0.3894	0.0077	0.0018	1.5e-05	690430
rs12470478	2:63769308	WDPCP	A/G	0.2389	-0.0086	0.002	1.5e-05	691012
rs8135284	22:37182681	IFT27	T/C	0.7284	0.0085	0.002	1.6e-05	689272
rs1471962	3:45949187	LZTFL1	C/G	0.1722	0.0102	0.0024	1.6e-05	664262
rs181236	17:56200848	MKS1	C/G	0.732	-0.0086	0.002	1.6e-05	679714
rs1147198	9:87275348	NTRK2	T/G	0.7703	0.0087	0.002	1.6e-05	692431
rs1409704	9:87106842	NTRK2	A/G	0.0573	0.0173	0.004	1.6e-05	661586
rs6559823	9:87348215	NTRK2	A/G	0.2598	-0.0085	0.002	1.6e-05	691209
rs9370552	6:56861117	RAB23	T/C	0.7845	-0.0089	0.0021	1.6e-05	692025
rs12140431	1:243596284	SDCCAG8	A/G	0.1524	-0.0105	0.0024	1.6e-05	770204
rs4821731	22:38445214	SOX10	A/C	0.5664	-0.0075	0.0017	1.6e-05	684875
rs1881235	11:8103991	TUB	A/G	0.96761	-0.0191	0.0044	1.6e-05	677528
rs2278718	2:63815801	WDPCP	A/C	0.7535	0.0085	0.002	1.6e-05	692439
rs7190673	16:3665303	CREBBP	T/G	0.7495	-0.0087	0.002	1.7e-05	679338
rs1332893	9:87250808	NTRK2	C/G	0.8918	0.012	0.0028	1.7e-05	691644
rs17347542	9:87238243	NTRK2	T/C	0.2467	-0.0087	0.002	1.7e-05	688426
rs3800023	6:56965696	RAB23	C/G	0.8563	-0.0106	0.0025	1.7e-05	692609
rs9396250	6:56871297	RAB23	A/G	0.7835	-0.0089	0.0021	1.7e-05	691146
rs11649804	17:17696755	RAI1	A/C	0.3032	-0.0082	0.0019	1.7e-05	692243
rs12943500	17:17790588	RAI1	T/C	0.5757	0.0075	0.0017	1.7e-05	690987
rs4821740	22:38514423	SOX10	C/G	0.6329	-0.0078	0.0018	1.7e-05	690870
rs6001020	22:38538246	SOX10	C/G	0.362	0.0077	0.0018	1.7e-05	689871
rs10840012	11:8326658	TUB	A/G	0.4042	0.0075	0.0018	1.7e-05	686818
rs2421862	2:63401973	WDPCP	A/G	0.2127	0.009	0.0021	1.7e-05	689633
rs2178198	2:27895073	IFT172	T/C	0.1415	-0.0106	0.0025	1.8e-05	785944
rs2012762	3:45672871	LZTFL1	T/G	0.6456	0.0077	0.0018	1.8e-05	681008
rs893566	3:45673062	LZTFL1	A/G	0.608	0.0076	0.0018	1.8e-05	680242
rs11079337	17:56162496	MKS1	A/C	0.6434	-0.0078	0.0018	1.8e-05	689683
rs7033151	9:87111819	NTRK2	T/G	0.93803	-0.0159	0.0037	1.8e-05	669725
rs1562908	6:56857665	RAB23	A/C	0.2173	0.0089	0.0021	1.8e-05	692162
rs6909828	6:100812678	SIM1	T/C	0.91914	-0.0136	0.0032	1.8e-05	690110
rs11950813	5:42742905	GHR	A/G	0.2772	0.0082	0.0019	1.9e-05	692150
rs12518414	5:42722078	GHR	A/G	0.2771	0.0082	0.0019	1.9e-05	692079
rs7958572	12:49509441	KMT2D	C/G	0.645	-0.0078	0.0018	1.9e-05	683380
rs12174666	6:84982208	MRAP2	T/C	0.7385	0.0084	0.002	1.9e-05	690034
rs1187327	9:87288540	NTRK2	T/C	0.4305	-0.0074	0.0017	1.9e-05	692294
rs6116750	20:5303842	PROKR2	T/C	0.5744	0.0076	0.0018	1.9e-05	678450
rs12119001	1:243601935	SDCCAG8	T/C	0.1679	-0.0098	0.0023	1.9e-05	692214
rs10840002	11:8243026	TUB	A/G	0.369	0.0078	0.0018	1.9e-05	665858
rs10496102	2:63731239	WDPCP	T/C	0.7539	0.0085	0.002	1.9e-05	691306
rs1356390	2:63669625	WDPCP	T/C	0.2859	0.0083	0.0019	1.9e-05	669854
rs6545977	2:63301164	WDPCP	A/G	0.4875	-0.0073	0.0017	1.9e-05	692527
rs6546005	2:63672071	WDPCP	A/G	0.7152	-0.0083	0.0019	1.9e-05	670242
rs11646156	16:3648546	CREBBP	C/G	0.04876	0.0185	0.0043	2e-05	673599
rs7224815	17:17845800	RAI1	A/T	0.5757	0.0074	0.0017	2e-05	691364
rs12049124	1:243598993	SDCCAG8	T/C	0.1714	-0.0098	0.0023	2e-05	691556
rs2783963	1:243501583	SDCCAG8	A/G	0.1589	-0.0107	0.0025	2e-05	684717
rs9466	22:38273749	SOX10	T/C	0.5768	-0.0074	0.0017	2e-05	692648
rs17136692	16:4068813	CREBBP	A/G	0.08402	-0.0133	0.0031	2.1e-05	645823
rs1187363	9:87337920	NTRK2	T/C	0.1715	-0.01	0.0023	2.1e-05	686514
rs17087470	9:87240311	NTRK2	T/C	0.8915	0.0119	0.0028	2.1e-05	690743
rs985542	9:87251245	NTRK2	C/G	0.5537	0.0073	0.0017	2.1e-05	691880
rs985543	9:87251183	NTRK2	A/G	0.5538	0.0073	0.0017	2.1e-05	691867
rs6685276	1:243603132	SDCCAG8	A/G	0.8313	0.0098	0.0023	2.1e-05	692173
rs3798513	6:100852179	SIM1	A/C	0.92031	-0.0134	0.0032	2.1e-05	680262
rs6741298	2:63926197	WDPCP	T/C	0.5447	-0.0073	0.0017	2.1e-05	687925
rs7717863	5:42741757	GHR	A/G	0.7226	-0.0081	0.0019	2.2e-05	692148
rs3817588	2:27731212	IFT172	T/C	0.8061	-0.0089	0.0021	2.2e-05	783398
rs1443440	9:87406168	NTRK2	T/C	0.7356	0.0085	0.002	2.2e-05	675053
rs1662696	9:87396495	NTRK2	T/C	0.2581	-0.0085	0.002	2.2e-05	682377
rs2012859	22:38473706	SOX10	A/G	0.309	-0.0081	0.0019	2.2e-05	684314
rs2284062	22:38544221	SOX10	A/G	0.6575	-0.0078	0.0018	2.2e-05	666584
rs7568224	2:63390996	WDPCP	A/G	0.7861	-0.0089	0.0021	2.2e-05	688158
rs10116453	9:87363201	NTRK2	A/T	0.2598	-0.0084	0.002	2.3e-05	689871
rs1147193	9:87272615	NTRK2	T/C	0.7708	0.0086	0.002	2.3e-05	692375
rs1307279	9:87281307	NTRK2	T/C	0.765	0.0086	0.002	2.3e-05	691281
rs2295595	6:100834063	SIM1	C/G	0.08062	0.0133	0.0031	2.3e-05	691302
rs760973	22:38447266	SOX10	A/C	0.5662	-0.0073	0.0017	2.3e-05	691155
rs4671501	2:63631889	WDPCP	A/C	0.5805	0.0075	0.0018	2.3e-05	637342
rs3790111	16:56381083	BBS2	A/G	0.8895	-0.012	0.0028	2.4e-05	683092
rs7725961	5:42723965	GHR	A/G	0.7229	-0.0081	0.0019	2.4e-05	691602
rs2446971	12:49262393	KMT2D	T/G	0.8645	0.0111	0.0026	2.4e-05	663896
rs13290917	9:87321367	NTRK2	A/G	0.03543	0.0208	0.0049	2.4e-05	666243
rs6924882	6:56864631	RAB23	A/G	0.2155	0.0087	0.0021	2.4e-05	691832
rs6702982	1:243608667	SDCCAG8	A/G	0.8258	0.0097	0.0023	2.4e-05	691915
rs3798515	6:100839294	SIM1	T/C	0.91926	-0.0132	0.0031	2.4e-05	691526
rs1009045	22:38267446	SOX10	C/G	0.6152	-0.0075	0.0018	2.4e-05	692241
rs11647319	16:56359488	BBS2	T/C	0.1452	0.0105	0.0025	2.5e-05	684389
rs1881837	15:93465187	CHD2	A/G	0.8336	-0.0099	0.0023	2.5e-05	690734
rs2284004	22:37064966	IFT27	C/G	0.2625	0.009	0.0021	2.5e-05	526015
rs6904172	6:56873422	RAB23	A/G	0.2157	0.0087	0.0021	2.5e-05	691300
rs3026629	22:38329285	SOX10	A/G	0.3502	0.0077	0.0018	2.5e-05	690467
rs2263636	2:63495365	WDPCP	A/C	0.2765	0.0087	0.0021	2.5e-05	531425
rs7652331	3:45962752	LZTFL1	T/C	0.3462	-0.0075	0.0018	2.6e-05	691348
rs6502629	17:17869642	RAI1	A/G	0.575	0.0073	0.0017	2.6e-05	690353
rs139905	22:38409596	SOX10	A/G	0.4269	0.0073	0.0017	2.6e-05	690105
rs2292793	2:63661280	WDPCP	A/G	0.2842	0.0077	0.0018	2.6e-05	768899
rs10518406	4:123762897	BBS12	A/G	0.95627	-0.0183	0.0044	2.7e-05	778486
rs7174740	15:93531714	CHD2	T/C	0.7467	-0.0084	0.002	2.7e-05	690217
rs6665625	1:243608833	SDCCAG8	C/G	0.1721	-0.0096	0.0023	2.7e-05	680446
rs12713497	2:63926545	WDPCP	T/C	0.4551	0.0072	0.0017	2.7e-05	688238
rs4671528	2:63924709	WDPCP	T/G	0.5434	-0.0073	0.0017	2.7e-05	684349
rs12479894	20:57442694	GNAS	A/G	0.97205	-0.0218	0.0052	2.8e-05	689394
rs10122106	9:87126492	NTRK2	T/C	0.05741	0.0153	0.0037	2.8e-05	687317
rs6001026	22:38545363	SOX10	T/C	0.3392	0.0077	0.0018	2.8e-05	691808
rs13002109	2:63346702	WDPCP	A/C	0.5112	-0.0072	0.0017	2.8e-05	684186
rs17408652	2:63390490	WDPCP	T/G	0.7846	-0.0088	0.0021	2.8e-05	688089
rs6741584	2:63926459	WDPCP	T/C	0.5449	-0.0072	0.0017	2.8e-05	688261
rs1406713	15:93461263	CHD2	C/G	0.1957	0.0092	0.0022	2.9e-05	688196
rs8180482	5:42765986	GHR	A/C	0.2746	0.008	0.0019	2.9e-05	691994
rs2531748	3:45819837	LZTFL1	A/G	0.6601	-0.0079	0.0019	2.9e-05	668052
rs139859	22:38341134	SOX10	T/C	0.3509	0.0076	0.0018	2.9e-05	691053
rs13431765	2:63417729	WDPCP	T/G	0.7721	-0.0085	0.002	2.9e-05	691629
rs7605319	2:63423495	WDPCP	T/C	0.2132	0.0087	0.0021	2.9e-05	691630
rs11629586	15:93704309	CHD2	C/G	0.7407	-0.0083	0.002	3e-05	684858
rs713952	22:37008487	IFT27	T/C	0.2374	0.0086	0.0021	3e-05	674203
rs7608470	2:63691478	WDPCP	T/C	0.2846	0.0081	0.0019	3e-05	669875
rs3750079	7:32969419	BBS9	A/G	0.2953	-0.0079	0.0019	3.1e-05	690975
rs4821995	22:41461836	EP300	A/G	0.3388	-0.0076	0.0018	3.1e-05	690168
rs3800018	6:57069606	RAB23	T/C	0.8528	-0.0102	0.0024	3.1e-05	688749
rs5756890	22:38445400	SOX10	A/C	0.5667	-0.0072	0.0017	3.1e-05	690865
rs742395	22:38447444	SOX10	A/G	0.5667	-0.0072	0.0017	3.1e-05	692608
rs9619724	22:38517880	SOX10	T/G	0.5408	-0.0072	0.0017	3.1e-05	691789
rs4623938	11:8109415	TUB	T/C	0.03221	0.0186	0.0045	3.1e-05	678267
rs17619354	2:63919765	WDPCP	A/G	0.2544	-0.0082	0.002	3.1e-05	684992
rs2053359	15:93540997	CHD2	T/C	0.7444	-0.0083	0.002	3.2e-05	690543
rs12054838	5:42750177	GHR	T/C	0.7228	-0.008	0.0019	3.2e-05	691797
rs12055266	5:42769647	GHR	T/C	0.7254	-0.008	0.0019	3.2e-05	691990
rs7734918	5:42768180	GHR	A/T	0.7254	-0.008	0.0019	3.2e-05	691989
rs1659409	9:87318287	NTRK2	A/G	0.4867	-0.0071	0.0017	3.2e-05	690914
rs4435209	15:93703284	CHD2	C/G	0.2598	0.0082	0.002	3.3e-05	688035
rs6546023	2:63919883	WDPCP	T/C	0.743	0.0082	0.002	3.3e-05	685043
rs4394301	7:33049584	BBS9	A/G	0.4971	0.0072	0.0017	3.4e-05	689306
rs11074121	15:93521604	CHD2	A/G	0.1705	0.0096	0.0023	3.4e-05	690102
rs12925070	16:4053015	CREBBP	T/C	0.91949	0.0134	0.0032	3.4e-05	647056
rs12519443	5:42819921	GHR	T/C	0.7261	-0.008	0.0019	3.4e-05	691184
rs5756261	22:37008330	IFT27	T/C	0.7629	-0.0085	0.002	3.4e-05	686073
rs3798500	6:100862427	SIM1	T/C	0.91879	-0.013	0.0031	3.4e-05	692154
rs1540858	11:8105759	TUB	A/G	0.96428	-0.0183	0.0044	3.4e-05	672550
rs262494	2:63845484	WDPCP	A/G	0.7468	-0.0082	0.002	3.4e-05	689060
rs12950704	17:56168713	MKS1	C/G	0.6806	-0.0077	0.0019	3.5e-05	692379
rs12656269	5:36787878	NIPBL	A/T	0.8248	0.0095	0.0023	3.5e-05	687800
rs2076116	22:38517405	SOX10	T/C	0.5404	-0.0072	0.0017	3.5e-05	691546
rs6497012	15:93519107	CHD2	C/G	0.1705	0.0096	0.0023	3.6e-05	690100
rs139883	22:38369027	SOX10	T/C	0.6266	-0.0074	0.0018	3.6e-05	692028
rs4384887	22:38447365	SOX10	T/C	0.4332	0.0072	0.0017	3.6e-05	691158
rs17554675	2:63919971	WDPCP	A/G	0.2536	-0.0081	0.002	3.6e-05	685027
rs4567921	2:63847114	WDPCP	A/G	0.244	-0.0089	0.0021	3.6e-05	528346
rs139887	22:38371396	SOX10	C/G	0.6266	-0.0073	0.0018	3.7e-05	691849
rs10203263	2:63454401	WDPCP	A/C	0.2267	0.0084	0.002	3.7e-05	692415
rs12900461	15:93552656	CHD2	T/C	0.8283	-0.0095	0.0023	3.8e-05	692407
rs2033847	15:93545831	CHD2	T/G	0.8292	-0.0096	0.0023	3.8e-05	691394
rs1364024	5:42724913	GHR	T/C	0.7224	-0.0081	0.002	3.8e-05	682760
rs2009667	22:37171611	IFT27	A/G	0.4495	-0.0074	0.0018	3.8e-05	674064
rs4244601	17:17625318	RAI1	A/G	0.1359	-0.0103	0.0025	3.8e-05	795255
rs7946	17:17409560	RAI1	T/C	0.7372	0.0082	0.002	3.8e-05	689680
rs11074122	15:93521651	CHD2	T/G	0.171	0.0096	0.0023	3.9e-05	690102
rs12915582	15:93552330	CHD2	T/C	0.8288	-0.0095	0.0023	3.9e-05	691945
rs2272458	15:93527843	CHD2	A/G	0.7442	-0.0082	0.002	3.9e-05	690231
rs11952526	5:42815433	GHR	A/G	0.2716	0.0079	0.0019	3.9e-05	691218
rs2113086	5:42827146	GHR	T/C	0.726	-0.0079	0.0019	3.9e-05	691363
rs1439047	9:87327918	NTRK2	A/G	0.4913	-0.0071	0.0017	3.9e-05	691096
rs4877880	9:87392708	NTRK2	A/G	0.2616	-0.0081	0.002	3.9e-05	685859
rs720856	17:17645951	RAI1	C/G	0.7554	0.0086	0.0021	3.9e-05	684368
rs139866	22:38354684	SOX10	T/C	0.6284	-0.0073	0.0018	3.9e-05	691630
rs10486527	7:33380673	BBS9	T/C	0.6938	0.0073	0.0018	4e-05	792113
rs1470071	15:93506792	CHD2	T/C	0.1669	0.0096	0.0023	4e-05	689475
rs7173849	15:93542000	CHD2	C/G	0.1708	0.0095	0.0023	4e-05	691304
rs2267344	22:37006344	IFT27	C/G	0.7631	-0.0087	0.0021	4e-05	671143
rs1778929	9:87322540	NTRK2	T/C	0.4868	-0.0071	0.0017	4e-05	691103
rs3906418	5:42790991	GHR	T/C	0.724	-0.0079	0.0019	4.1e-05	691302
rs2284000	22:37053338	IFT27	C/G	0.7091	-0.0079	0.0019	4.1e-05	675728
rs2579371	9:87334068	NTRK2	T/C	0.5087	0.0071	0.0017	4.1e-05	689520
rs11868035	17:17715101	RAI1	A/G	0.3044	-0.0078	0.0019	4.1e-05	684920
rs17060534	6:100862051	SIM1	A/G	0.08536	0.0128	0.0031	4.1e-05	692180
rs7182854	15:73079504	BBS4	A/G	0.1072	-0.0115	0.0028	4.2e-05	687480
rs6026563	20:57433342	GNAS	A/G	0.97159	-0.0212	0.0052	4.2e-05	683958
rs10767653	11:27638290	BDNF	A/G	0.5899	0.0072	0.0018	4.3e-05	689094
rs1025768	15:93517214	CHD2	A/G	0.8289	-0.0095	0.0023	4.3e-05	690003
rs4821987	22:41437269	EP300	T/C	0.2282	-0.0084	0.0021	4.3e-05	690289
rs3774675	3:45667387	LZTFL1	T/C	0.7296	-0.0075	0.0018	4.3e-05	788751
rs12659981	5:36788098	NIPBL	T/C	0.8247	0.0107	0.0026	4.3e-05	560605
rs10817947	9:119633124	TRIM32	A/G	0.0791	0.0131	0.0032	4.3e-05	673843
rs4480535	11:8323819	TUB	A/G	0.4294	0.0072	0.0017	4.3e-05	685432
rs2267346	22:37007470	IFT27	T/C	0.2371	0.0084	0.0021	4.4e-05	673541
rs3785492	17:56488063	MKS1	T/C	0.7886	0.0086	0.0021	4.4e-05	685410
rs12659960	5:36788015	NIPBL	T/G	0.8247	0.0094	0.0023	4.4e-05	687840
rs16888392	6:57076552	RAB23	A/G	0.1455	0.01	0.0024	4.4e-05	680749
rs7747929	6:100871488	SIM1	T/C	0.6668	-0.0075	0.0018	4.4e-05	690774
rs1371391	15:93551800	CHD2	A/G	0.8288	-0.0094	0.0023	4.5e-05	691534
rs1883987	22:37053469	IFT27	T/C	0.659	-0.0075	0.0018	4.5e-05	686575
rs16903329	5:36767262	NIPBL	T/C	0.1356	-0.0106	0.0026	4.5e-05	686231
rs172384	5:36804225	NIPBL	A/G	0.8211	0.0093	0.0023	4.5e-05	689016
rs181242	17:56203785	MKS1	T/G	0.2666	0.0081	0.002	4.6e-05	680829
rs13301866	9:87137894	NTRK2	T/C	0.03105	0.0194	0.0048	4.6e-05	687640
rs139898	22:38399979	SOX10	A/G	0.3782	0.0073	0.0018	4.6e-05	690556
rs3794699	16:3718728	CREBBP	T/C	0.7935	-0.0088	0.0022	4.7e-05	675874
rs8060345	16:29023105	SH2B1	C/G	0.6832	-0.0078	0.0019	4.7e-05	647520
rs132972	22:38562056	SOX10	T/C	0.4636	-0.0071	0.0017	4.7e-05	687111
rs11074124	15:93536666	CHD2	A/G	0.747	-0.0081	0.002	4.8e-05	690279
rs11856160	15:93452846	CHD2	A/G	0.8406	-0.0097	0.0024	4.8e-05	686463
rs292164	5:36804745	NIPBL	T/C	0.825	0.0093	0.0023	4.8e-05	689142
rs3827354	22:38523065	SOX10	T/C	0.4028	-0.0072	0.0018	4.8e-05	692557
rs10252880	7:33110659	BBS9	C/G	0.3176	-0.0081	0.002	4.9e-05	532876
rs4821992	22:41443075	EP300	T/C	0.2288	-0.0084	0.0021	4.9e-05	690255
rs10081630	9:87328898	NTRK2	A/T	0.03455	0.0187	0.0046	4.9e-05	691161
rs1187326	9:87285915	NTRK2	T/C	0.772	0.0085	0.0021	4.9e-05	637456
rs720885	6:56877460	RAB23	A/G	0.2146	0.0085	0.0021	4.9e-05	692600
rs13417792	2:63447200	WDPCP	T/G	0.213	0.0085	0.0021	4.9e-05	690908
rs196123	2:63841712	WDPCP	T/C	0.2527	0.008	0.002	4.9e-05	689781
rs7698	16:30125800	KCTD13	A/G	0.07758	-0.0136	0.0034	5e-05	691311
rs139879	22:38364552	SOX10	T/C	0.371	0.0072	0.0018	5e-05	692544
rs1035516	5:42823799	GHR	A/G	0.7219	-0.0078	0.0019	5.1e-05	691381
rs1138908	12:49402299	KMT2D	C/G	0.3955	0.0078	0.0019	5.1e-05	527852
rs4403617	1:243611266	SDCCAG8	A/G	0.1626	-0.0098	0.0024	5.1e-05	674649
rs10840000	11:8240113	TUB	C/G	0.5516	-0.0071	0.0017	5.1e-05	681995
rs2553041	2:63238346	WDPCP	C/G	0.1953	0.0085	0.0021	5.1e-05	775979
rs4777778	15:93697717	CHD2	A/T	0.1933	0.0088	0.0022	5.2e-05	690121
rs2267359	22:37021398	IFT27	A/G	0.7618	-0.0082	0.002	5.2e-05	676586
rs10512152	9:87227809	NTRK2	A/G	0.97071	-0.0197	0.0049	5.2e-05	675727
rs4813744	20:5341009	PROKR2	T/C	0.4444	-0.007	0.0017	5.2e-05	685728
rs6865453	5:42810139	GHR	A/C	0.7256	-0.0078	0.0019	5.3e-05	691456
rs139865	22:38353932	SOX10	C/G	0.3717	0.0073	0.0018	5.3e-05	691184
rs139891	22:38387914	SOX10	T/G	0.6214	-0.0072	0.0018	5.3e-05	691379
rs7171728	15:73050820	BBS4	C/G	0.7609	0.0082	0.002	5.4e-05	691243
rs728633	11:27781979	BDNF	A/G	0.7696	-0.0083	0.0021	5.4e-05	679684
rs6441934	3:45962802	LZTFL1	T/C	0.208	-0.0086	0.0021	5.4e-05	688033
rs17087704	9:87405751	NTRK2	A/T	0.96428	-0.0188	0.0047	5.4e-05	674616
rs7929080	11:8302755	TUB	A/G	0.2847	-0.0077	0.0019	5.4e-05	691507
rs1778934	9:87324622	NTRK2	A/G	0.5081	0.0069	0.0017	5.5e-05	691011
rs3811360	16:56380570	BBS2	A/G	0.8879	-0.0116	0.0029	5.6e-05	629193
rs4777534	15:73050222	BBS4	T/C	0.2392	-0.0081	0.002	5.6e-05	691195
rs2239305	16:4037918	CREBBP	A/G	0.2386	-0.0085	0.0021	5.6e-05	672346
rs11656775	17:17654319	RAI1	A/G	0.3268	-0.0071	0.0018	5.6e-05	788532
rs139884	22:38369976	SOX10	A/G	0.3712	0.0072	0.0018	5.6e-05	691965
rs12701265	7:32971236	BBS9	A/G	0.4004	0.0071	0.0018	5.7e-05	692513
rs11639256	15:93528473	CHD2	T/C	0.2529	0.0081	0.002	5.7e-05	684246
rs2161600	5:42824440	GHR	A/T	0.726	-0.0077	0.0019	5.7e-05	691389
rs4821501	22:36954939	IFT27	T/C	0.569	-0.0074	0.0018	5.7e-05	635614
rs11789677	9:87238610	NTRK2	A/G	0.7531	0.0077	0.0019	5.7e-05	791569
rs1881237	11:8110479	TUB	A/G	0.96574	-0.0177	0.0044	5.7e-05	678144
rs16957297	15:73079208	BBS4	A/G	0.1062	-0.0114	0.0028	5.8e-05	686652
rs1439620	15:93429646	CHD2	A/G	0.319	0.0071	0.0018	5.8e-05	789595
rs292166	5:36805469	NIPBL	T/G	0.825	0.0092	0.0023	5.8e-05	689421
rs1108659	16:56356034	BBS2	C/G	0.1434	0.01	0.0025	5.9e-05	691723
rs2047101	12:49497643	KMT2D	A/T	0.3424	0.0076	0.0019	5.9e-05	636497
rs2279596	12:49498751	KMT2D	A/G	0.344	0.0076	0.0019	5.9e-05	636530
rs13295359	9:87173672	NTRK2	T/C	0.03081	0.0191	0.0048	5.9e-05	691110
rs6497014	15:93544696	CHD2	T/C	0.2528	0.008	0.002	6e-05	690523
rs7717985	5:42741635	GHR	A/G	0.3005	0.0076	0.0019	6e-05	692053
rs10875935	12:49609166	KMT2D	A/G	0.2413	0.0081	0.002	6e-05	692013
rs13293362	9:87325380	NTRK2	T/C	0.0335	0.0187	0.0047	6e-05	690670
rs7180285	15:93499385	CHD2	A/G	0.1659	0.0094	0.0023	6.1e-05	689075
rs6883543	5:42742513	GHR	A/G	0.3005	0.0076	0.0019	6.1e-05	692038
rs2191030	3:45910946	LZTFL1	T/C	0.2246	-0.0084	0.0021	6.1e-05	677073
rs292162	5:36803880	NIPBL	T/C	0.825	0.0092	0.0023	6.1e-05	688993
rs6026562	20:57432211	GNAS	T/C	0.97159	-0.0207	0.0052	6.2e-05	684105
rs4777774	15:93695495	CHD2	C/G	0.7406	-0.0079	0.002	6.3e-05	689363
rs1535821	6:84978327	MRAP2	A/G	0.658	0.0073	0.0018	6.3e-05	691997
rs131825	22:37046761	IFT27	C/G	0.7243	-0.0079	0.002	6.4e-05	676496
rs13293344	9:87229619	NTRK2	T/C	0.97071	-0.0199	0.005	6.4e-05	675343
rs13301598	9:87174907	NTRK2	A/G	0.03081	0.019	0.0048	6.5e-05	691119
rs3798504	6:100858936	SIM1	A/T	0.91949	-0.0126	0.0031	6.5e-05	680473
rs1971456	20:5304961	PROKR2	T/C	0.4282	-0.0071	0.0018	6.6e-05	674843
rs6076821	20:5343641	PROKR2	T/C	0.445	-0.0069	0.0017	6.8e-05	691563
rs2284060	22:38543453	SOX10	T/C	0.5686	-0.007	0.0017	6.8e-05	686528
rs17408037	2:63199709	WDPCP	A/G	0.8375	0.0092	0.0023	6.8e-05	688503
rs2233908	17:56085257	MKS1	A/G	0.1729	0.0092	0.0023	6.9e-05	691191
rs13284056	9:87171710	NTRK2	C/G	0.96919	-0.0189	0.0048	6.9e-05	691139
rs4777755	15:93510603	CHD2	A/G	0.1698	0.0093	0.0023	7e-05	689339
rs9607759	22:41343839	EP300	T/C	0.98831	0.0332	0.0084	7e-05	643198
rs4866949	5:42718422	GHR	T/C	0.6995	-0.0075	0.0019	7e-05	691956
rs13284846	9:87171527	NTRK2	T/G	0.96919	-0.0189	0.0048	7e-05	691131
rs7708223	5:42723898	GHR	T/C	0.6996	-0.0075	0.0019	7.1e-05	691944
rs1535820	6:84978482	MRAP2	T/C	0.6582	0.0073	0.0018	7.1e-05	692321
rs2123010	5:36921325	NIPBL	T/C	0.8738	0.0105	0.0026	7.1e-05	691443
rs1242515	17:17385990	RAI1	A/C	0.7316	0.0078	0.002	7.1e-05	691824
rs139893	22:38393608	SOX10	A/G	0.6235	-0.0071	0.0018	7.2e-05	690515
rs2032466	22:37022486	IFT27	C/G	0.7625	-0.0081	0.002	7.3e-05	675489
rs1488373	3:45957689	LZTFL1	T/C	0.7514	0.0078	0.002	7.3e-05	692263
rs17346028	9:87172347	NTRK2	A/G	0.03081	0.0189	0.0048	7.3e-05	690998
rs12900800	15:93512678	CHD2	A/G	0.7508	-0.008	0.002	7.4e-05	688611
rs7167265	15:93704049	CHD2	T/C	0.8064	-0.0087	0.0022	7.4e-05	687662
rs13293356	9:87333948	NTRK2	A/T	0.9665	-0.0185	0.0047	7.4e-05	690606
rs4877286	9:87343940	NTRK2	A/G	0.03397	0.0186	0.0047	7.4e-05	688615
rs7630228	3:71681487	PROK2	T/C	0.5619	0.007	0.0018	7.4e-05	680262
rs1242490	17:17393236	RAI1	C/G	0.7321	0.0078	0.002	7.4e-05	691795
rs3798498	6:100878267	SIM1	T/C	0.6034	0.0071	0.0018	7.4e-05	679561
rs7118748	11:8291906	TUB	T/C	0.8005	-0.0081	0.0021	7.4e-05	791914
rs4238464	15:93701227	CHD2	A/G	0.806	-0.0086	0.0022	7.5e-05	691219
rs328300	8:38344499	FGFR1	T/G	0.5157	0.0069	0.0017	7.5e-05	680608
rs12521615	5:42832162	GHR	A/G	0.2849	0.0075	0.0019	7.5e-05	690386
rs2267351	22:37015518	IFT27	A/G	0.2381	0.008	0.002	7.5e-05	691759
rs13422328	2:63466177	WDPCP	A/C	0.7715	-0.0081	0.0021	7.5e-05	690922
rs10491574	9:119622438	TRIM32	T/C	0.1158	0.0107	0.0027	7.6e-05	688600
rs17474231	2:63230081	WDPCP	T/C	0.8524	0.0097	0.0024	7.6e-05	687370
rs1993886	16:56355541	BBS2	T/C	0.8571	-0.0098	0.0025	7.7e-05	691530
rs13302506	9:87167743	NTRK2	T/C	0.96913	-0.0188	0.0048	7.7e-05	691129
rs4237769	11:8275127	TUB	A/G	0.4072	-0.007	0.0018	7.7e-05	685237
rs262491	2:63841113	WDPCP	T/C	0.2526	0.0078	0.002	7.7e-05	683222
rs10941593	5:42831707	GHR	T/G	0.7151	-0.0075	0.0019	7.8e-05	690406
rs12233949	5:42607461	GHR	C/G	0.2946	0.0072	0.0018	7.8e-05	783117
rs7725776	5:42723756	GHR	T/C	0.3004	0.0074	0.0019	7.8e-05	691938
rs4924755	17:17397131	RAI1	C/G	0.7344	0.0078	0.002	7.8e-05	691532
rs4784658	16:56376282	BBS2	T/C	0.2611	-0.0074	0.0019	7.9e-05	785214
rs149265	20:57566637	GNAS	T/C	0.6389	-0.0072	0.0018	7.9e-05	689579
rs2585829	17:56085927	MKS1	C/G	0.8279	-0.0092	0.0023	7.9e-05	685319
rs7215141	17:56095742	MKS1	A/G	0.1729	0.0092	0.0023	7.9e-05	690718
rs6516026	20:5344112	PROKR2	T/C	0.4456	-0.0069	0.0017	7.9e-05	691985
rs3734357	6:100868492	SIM1	A/T	0.6587	-0.0072	0.0018	7.9e-05	690621
rs11041737	11:8111853	TUB	A/G	0.02941	0.0179	0.0045	7.9e-05	671605
rs17618390	2:63831325	WDPCP	C/G	0.731	0.0076	0.0019	7.9e-05	692112
rs9637794	5:42833332	GHR	A/G	0.2849	0.0075	0.0019	8e-05	690373
rs17087580	9:87347756	NTRK2	T/C	0.96399	-0.0183	0.0046	8e-05	688951
rs1889018	17:17734740	RAI1	A/G	0.632	0.0071	0.0018	8e-05	686288
rs4238463	15:93701165	CHD2	T/C	0.1952	0.0086	0.0022	8.1e-05	690729
rs12921697	16:4059746	CREBBP	T/C	0.07881	-0.0129	0.0033	8.1e-05	649054
rs12187996	5:42717610	GHR	T/C	0.3004	0.0074	0.0019	8.1e-05	691509
rs2282529	11:66184140	BBS1	A/G	0.4303	-0.0069	0.0018	8.2e-05	680835
rs12519532	5:42829303	GHR	A/G	0.2849	0.0075	0.0019	8.3e-05	691461
rs10735819	12:49626490	KMT2D	T/C	0.6794	-0.0069	0.0018	8.3e-05	794833
rs13292278	9:87248912	NTRK2	T/C	0.03309	0.0186	0.0047	8.3e-05	675278
rs4140424	20:5341923	PROKR2	T/C	0.4454	-0.0068	0.0017	8.3e-05	692370
rs2233906	17:56085439	MKS1	T/C	0.829	-0.0092	0.0023	8.4e-05	691183
rs1346165	15:73077953	BBS4	A/G	0.1061	-0.0111	0.0028	8.5e-05	686966
rs4777776	15:93696651	CHD2	C/G	0.7408	-0.0078	0.002	8.5e-05	691292
rs2899268	22:37012219	IFT27	A/T	0.2374	0.0079	0.002	8.5e-05	692253
rs2579372	9:87259620	NTRK2	A/G	0.5636	0.0074	0.0019	8.6e-05	531038
rs139897	22:38399098	SOX10	A/G	0.3766	0.007	0.0018	8.6e-05	690577
rs10515155	17:56481944	MKS1	A/G	0.7957	0.0083	0.0021	8.7e-05	692370
rs10759869	9:119621696	TRIM32	T/G	0.1133	0.0106	0.0027	8.7e-05	688736
rs12362235	11:8276658	TUB	A/G	0.5927	0.007	0.0018	8.7e-05	681496
rs2240259	17:56458129	MKS1	A/C	0.7957	0.0083	0.0021	8.8e-05	692447
rs4683159	3:46025013	LZTFL1	A/G	0.3397	-0.007	0.0018	8.9e-05	692465
rs3778035	6:100868009	SIM1	T/C	0.92002	-0.0122	0.0031	8.9e-05	691258
rs4671509	2:63686004	WDPCP	A/G	0.7156	-0.0082	0.0021	8.9e-05	512952
rs3945967	20:57368350	GNAS	A/G	0.03128	0.0195	0.005	9e-05	683805
rs9810934	3:45954352	LZTFL1	A/G	0.2454	-0.0078	0.002	9e-05	692542
rs6502625	17:17848286	RAI1	C/G	0.4077	-0.0069	0.0018	9e-05	689673
rs9306311	22:37050675	IFT27	C/G	0.7237	-0.0077	0.002	9.1e-05	680447
rs12352017	9:87124543	NTRK2	A/G	0.06092	0.0141	0.0036	9.1e-05	675885
rs139892	22:38388203	SOX10	A/G	0.623	-0.007	0.0018	9.1e-05	691649
rs4758050	11:8238545	TUB	C/G	0.5506	-0.0068	0.0017	9.1e-05	691520
rs2168274	2:63918988	WDPCP	A/T	0.5457	-0.0068	0.0017	9.1e-05	681726
rs5756270	22:37023096	IFT27	A/C	0.2372	0.0079	0.002	9.2e-05	687000
rs9902941	17:17733760	RAI1	T/C	0.6338	0.0071	0.0018	9.2e-05	686045
rs4866797	5:42747348	GHR	T/G	0.6995	-0.0074	0.0019	9.3e-05	691745
rs4479310	17:17405504	RAI1	T/C	0.7368	0.0078	0.002	9.3e-05	687908
rs139895	22:38397034	SOX10	A/G	0.623	-0.007	0.0018	9.3e-05	690879
rs11950811	5:42742897	GHR	T/G	0.3005	0.0082	0.0021	9.4e-05	656634
rs10875880	12:49244263	KMT2D	C/G	0.3308	-0.0073	0.0019	9.4e-05	682863
rs738977	22:37008928	IFT27	A/G	0.2379	0.008	0.002	9.5e-05	686969
rs11957181	5:42746556	GHR	T/C	0.6995	-0.0074	0.0019	9.6e-05	691747
rs2267347	22:37012953	IFT27	A/G	0.2395	0.0079	0.002	9.6e-05	692434
rs6076820	20:5343487	PROKR2	A/G	0.4456	-0.0068	0.0017	9.6e-05	692198
rs84770	22:38390128	SOX10	T/G	0.3766	0.0069	0.0018	9.6e-05	691034
rs1108657	16:56355821	BBS2	T/C	0.8568	-0.0097	0.0025	9.7e-05	691227
rs1873001	3:46032847	LZTFL1	T/C	0.6403	0.0069	0.0018	9.7e-05	690392
rs6076823	20:5343852	PROKR2	A/G	0.4456	-0.0068	0.0017	9.7e-05	692131
rs6718609	2:63459809	WDPCP	T/G	0.7722	-0.008	0.0021	9.7e-05	691179
rs12187466	5:42751797	GHR	T/C	0.7016	-0.0073	0.0019	9.8e-05	691675
rs4866954	5:42747162	GHR	T/C	0.6995	-0.0074	0.0019	9.8e-05	691721
rs2267348	22:37013167	IFT27	C/G	0.2374	0.0078	0.002	9.8e-05	692611
rs7618618	3:45963497	LZTFL1	T/G	0.7595	0.0077	0.002	9.8e-05	685541
rs2133660	3:46031957	LZTFL1	T/C	0.6403	0.0069	0.0018	9.9e-05	690916
rs6076819	20:5343423	PROKR2	A/G	0.4456	-0.0068	0.0017	9.9e-05	692275
rs7153778	14:89252165	TTC8	C/G	0.2494	0.0078	0.002	9.9e-05	687787
rs1860601	7:33484507	BBS9	T/G	0.7423	0.0077	0.002	0.0001	688358
rs2239312	16:4066435	CREBBP	A/G	0.1515	-0.0095	0.0024	0.0001	651710
rs10941592	5:42831514	GHR	T/C	0.2849	0.0074	0.0019	0.0001	690404
rs11953691	5:42746426	GHR	T/C	0.3004	0.0073	0.0019	0.0001	691758
rs12055087	5:42769632	GHR	A/C	0.2976	0.0073	0.0019	0.0001	691859
rs4242120	5:42747537	GHR	A/G	0.6995	-0.0073	0.0019	0.0001	691742
rs4242121	5:42747662	GHR	A/G	0.6995	-0.0073	0.0019	0.0001	691741
rs7959497	12:49592117	KMT2D	A/G	0.6429	-0.0071	0.0018	0.0001	684896
rs11130082	3:46025518	LZTFL1	T/C	0.34	-0.007	0.0018	0.0001	692349
rs1532070	3:45970842	LZTFL1	C/G	0.755	0.0077	0.002	0.0001	691547
rs6764244	3:45994510	LZTFL1	A/T	0.2442	-0.0077	0.002	0.0001	691777
rs7628447	3:46030003	LZTFL1	T/C	0.6601	0.007	0.0018	0.0001	691692
rs7042809	9:87108657	NTRK2	T/C	0.93756	-0.0139	0.0036	0.0001	675973
rs11654081	17:17708129	RAI1	T/C	0.3651	-0.0071	0.0018	0.0001	685547
rs5756926	22:38542613	SOX10	T/C	0.6567	-0.0071	0.0018	0.0001	689916
rs12885389	14:89179308	TTC8	A/G	0.249	0.0077	0.002	0.0001	692107
rs17408841	2:63397974	WDPCP	A/G	0.7732	-0.0079	0.002	0.0001	688381
rs4783935	16:56375496	BBS2	T/C	0.2576	-0.0077	0.002	0.00011	681265
rs6978828	7:32994305	BBS9	T/C	0.5987	-0.0068	0.0018	0.00011	689651
rs8026638	15:93511848	CHD2	T/C	0.1669	0.0094	0.0024	0.00011	676880
rs10093843	8:38334038	FGFR1	T/C	0.1362	-0.0099	0.0026	0.00011	688796
rs7012413	8:38317398	FGFR1	T/C	0.3045	0.0073	0.0019	0.00011	692573
rs10941586	5:42749123	GHR	A/G	0.6995	-0.0073	0.0019	0.00011	691716
rs3797311	5:42757179	GHR	A/G	0.7024	-0.0073	0.0019	0.00011	691667
rs4866796	5:42744895	GHR	A/G	0.3004	0.0073	0.0019	0.00011	691696
rs6899268	5:42771825	GHR	T/G	0.7024	-0.0073	0.0019	0.00011	691838
rs722678	5:42748122	GHR	T/C	0.3005	0.0073	0.0019	0.00011	691736
rs6026540	20:57391435	GNAS	A/G	0.9703	-0.0194	0.005	0.00011	689473
rs5756259	22:37004171	IFT27	T/C	0.7327	-0.0079	0.002	0.00011	661236
rs10875939	12:49652283	KMT2D	A/T	0.2375	0.0081	0.0021	0.00011	677399
rs13086858	3:46026699	LZTFL1	A/C	0.66	0.0069	0.0018	0.00011	692397
rs7634640	3:45982119	LZTFL1	T/C	0.2526	-0.0076	0.002	0.00011	691687
rs2240258	17:56458183	MKS1	A/C	0.204	-0.0082	0.0021	0.00011	692491
rs3785493	17:56472119	MKS1	T/G	0.7959	0.0082	0.0021	0.00011	692364
rs10512153	9:87371365	NTRK2	T/G	0.03397	0.0183	0.0047	0.00011	686551
rs7039299	9:87350878	NTRK2	A/G	0.96387	-0.0179	0.0046	0.00011	688964
rs17663365	3:71683206	PROK2	A/G	0.4311	-0.0068	0.0018	0.00011	689923
rs9899634	17:17727943	RAI1	A/T	0.6335	0.007	0.0018	0.00011	685631
rs8045276	16:29025978	SH2B1	T/C	0.3039	0.0075	0.0019	0.00011	651214
rs4820315	22:38518731	SOX10	T/C	0.3551	0.0071	0.0018	0.00011	691036
rs11041829	11:8276735	TUB	A/T	0.5928	0.0068	0.0018	0.00011	682303
rs4758051	11:8238639	TUB	A/G	0.5499	-0.0063	0.0016	0.00011	794732
rs8031691	15:73064927	BBS4	A/G	0.8902	0.0107	0.0028	0.00012	691080
rs1037324	7:32981161	BBS9	A/C	0.5995	-0.0068	0.0018	0.00012	690853
rs10941591	5:42830976	GHR	A/T	0.2983	0.0075	0.0019	0.00012	656515
rs1364026	5:42780297	GHR	A/C	0.7024	-0.0073	0.0019	0.00012	691731
rs2910871	5:42734622	GHR	A/C	0.3114	0.0072	0.0019	0.00012	691851
rs4866798	5:42798315	GHR	A/G	0.7024	-0.0072	0.0019	0.00012	691732
rs4866963	5:42795088	GHR	A/G	0.7024	-0.0073	0.0019	0.00012	691373
rs1873000	3:46029458	LZTFL1	C/G	0.6601	0.0069	0.0018	0.00012	691707
rs12004662	9:87162946	NTRK2	A/G	0.03327	0.018	0.0047	0.00012	688388
rs17663591	3:71689923	PROK2	T/C	0.2875	-0.0076	0.002	0.00012	667201
rs7268107	20:5340331	PROKR2	A/G	0.5536	0.0067	0.0017	0.00012	690265
rs241816	6:100879651	SIM1	T/C	0.6525	0.007	0.0018	0.00012	691277
rs2235345	22:38518177	SOX10	T/C	0.342	0.0071	0.0018	0.00012	691656
rs4820314	22:38518538	SOX10	A/G	0.3428	0.007	0.0018	0.00012	691294
rs5750546	22:38542499	SOX10	T/C	0.3433	0.0071	0.0018	0.00012	689922
rs11846241	14:89204354	TTC8	T/C	0.2494	0.0076	0.002	0.00012	692122
rs262534	2:63906375	WDPCP	A/T	0.3354	0.007	0.0018	0.00012	691231
rs11982012	7:33377472	BBS9	T/C	0.6926	0.0072	0.0019	0.00013	688536
rs1967308	16:4065677	CREBBP	T/C	0.1532	-0.0093	0.0024	0.00013	663750
rs1862628	5:42723128	GHR	T/C	0.6879	-0.0072	0.0019	0.00013	691937
rs7579	5:42800808	GHR	T/C	0.2977	0.0072	0.0019	0.00013	691663
rs6015373	20:57373368	GNAS	T/C	0.9703	-0.0193	0.005	0.00013	688598
rs6015381	20:57393614	GNAS	C/G	0.02941	0.0194	0.0051	0.00013	688857
rs6026538	20:57389420	GNAS	T/C	0.97036	-0.0192	0.005	0.00013	689441
rs2173641	3:46102786	LZTFL1	T/G	0.3604	-0.0068	0.0018	0.00013	691207
rs7130	3:45959515	LZTFL1	A/T	0.2419	-0.0076	0.002	0.00013	692173
rs12654646	5:37038232	NIPBL	T/C	0.1221	-0.0102	0.0027	0.00013	691016
rs11999443	9:87165909	NTRK2	A/G	0.96673	-0.0179	0.0047	0.00013	688355
rs12000751	9:87163030	NTRK2	A/G	0.96673	-0.0179	0.0047	0.00013	688333
rs12003381	9:87166264	NTRK2	T/C	0.03327	0.0179	0.0047	0.00013	688362
rs12004583	9:87162720	NTRK2	T/C	0.03362	0.0179	0.0047	0.00013	688333
rs12057045	9:87450224	NTRK2	A/T	0.7692	-0.0079	0.0021	0.00013	675550
rs17087311	9:87132638	NTRK2	T/C	0.03783	0.0173	0.0045	0.00013	687592
rs17087356	9:87157958	NTRK2	T/C	0.03321	0.0179	0.0047	0.00013	688288
rs17326762	9:87357451	NTRK2	T/C	0.03397	0.018	0.0047	0.00013	688473
rs6559817	9:87165295	NTRK2	A/G	0.96673	-0.018	0.0047	0.00013	688354
rs7022544	9:87165815	NTRK2	A/C	0.96673	-0.0179	0.0047	0.00013	688355
rs4815801	20:5339666	PROKR2	T/G	0.4466	-0.0066	0.0017	0.00013	690664
rs7268162	20:5340402	PROKR2	A/G	0.5536	0.0066	0.0017	0.00013	690464
rs12677487	8:117710779	RAD21	T/C	0.8863	0.0103	0.0027	0.00013	691867
rs4924891	17:17403874	RAI1	T/C	0.7352	0.0076	0.002	0.00013	686778
rs711352	17:17397818	RAI1	C/G	0.7565	0.008	0.0021	0.00013	637385
rs8066560	17:17728043	RAI1	A/G	0.364	-0.0069	0.0018	0.00013	685639
rs10499031	6:101036834	SIM1	C/G	0.90201	-0.0115	0.003	0.00013	684276
rs3788534	22:38533971	SOX10	A/T	0.6569	-0.007	0.0018	0.00013	690111
rs941666	14:89210807	TTC8	T/C	0.2522	0.0076	0.002	0.00013	692045
rs12713494	2:63698162	WDPCP	T/G	0.7122	-0.0074	0.0019	0.00013	669763
rs13009169	2:63405218	WDPCP	A/G	0.2837	-0.0073	0.0019	0.00013	687797
rs17282194	16:56365355	BBS2	T/C	0.3631	-0.0069	0.0018	0.00014	687762
rs6462471	7:33377961	BBS9	A/G	0.3295	-0.007	0.0018	0.00014	687574
rs1046068	5:42805446	GHR	T/C	0.7024	-0.0072	0.0019	0.00014	691510
rs2973028	5:42746081	GHR	A/G	0.3114	0.0071	0.0019	0.00014	691421
rs3870358	5:42792482	GHR	T/C	0.2976	0.0072	0.0019	0.00014	691159
rs3870359	5:42792697	GHR	A/G	0.2976	0.0072	0.0019	0.00014	691159
rs2753	12:49521672	KMT2D	A/G	0.3459	0.0069	0.0018	0.00014	692591
rs7307435	12:49648666	KMT2D	T/C	0.7281	-0.0074	0.002	0.00014	684377
rs17379500	9:87346520	NTRK2	A/C	0.03397	0.0179	0.0047	0.00014	676594
rs1891979	9:87365866	NTRK2	A/T	0.96603	-0.018	0.0047	0.00014	688455
rs3758316	9:87282568	NTRK2	A/G	0.96656	-0.0178	0.0047	0.00014	678906
rs4877881	9:87405604	NTRK2	A/C	0.96375	-0.0178	0.0047	0.00014	687703
rs7467275	9:87167265	NTRK2	T/C	0.03327	0.0178	0.0047	0.00014	689670
rs1028555	20:5337541	PROKR2	T/C	0.553	0.0066	0.0017	0.00014	690849
rs6085130	20:5340447	PROKR2	T/C	0.4458	-0.0066	0.0017	0.00014	690891
rs2350976	17:17708529	RAI1	A/G	0.3701	-0.0071	0.0019	0.00014	630739
rs4925119	17:17742904	RAI1	A/G	0.3645	-0.0069	0.0018	0.00014	686554
rs7503334	17:17779458	RAI1	T/C	0.6143	0.0064	0.0017	0.00014	794101
rs3788536	22:38534209	SOX10	T/C	0.343	0.007	0.0018	0.00014	690059
rs7205545	16:56381312	BBS2	A/G	0.3113	0.0071	0.0019	0.00015	691805
rs12594844	15:73071007	BBS4	C/G	0.90873	0.011	0.0029	0.00015	683346
rs10941594	5:42918789	GHR	T/C	0.09319	0.0111	0.0029	0.00015	636222
rs11958761	5:42848090	GHR	C/G	0.2443	0.0076	0.002	0.00015	691543
rs12517112	5:42806635	GHR	T/C	0.7009	-0.0072	0.0019	0.00015	691024
rs1345825	5:42724518	GHR	A/C	0.6883	-0.0071	0.0019	0.00015	691903
rs6026543	20:57394025	GNAS	A/G	0.03017	0.0188	0.005	0.00015	690721
rs1047444	3:45960079	LZTFL1	A/C	0.7573	0.0075	0.002	0.00015	692172
rs1488374	3:45961842	LZTFL1	T/C	0.7573	0.0075	0.002	0.00015	691958
rs2014835	17:56417287	MKS1	T/C	0.8297	0.0088	0.0023	0.00015	682886
rs12552381	9:87402990	NTRK2	T/C	0.96387	-0.0177	0.0047	0.00015	676371
rs12552425	9:87403399	NTRK2	T/C	0.96387	-0.0177	0.0047	0.00015	676368
rs12555159	9:87394832	NTRK2	A/G	0.03613	0.0176	0.0047	0.00015	676528
rs2889962	9:87362039	NTRK2	A/G	0.96375	-0.0176	0.0046	0.00015	684248
rs4454365	9:87167432	NTRK2	C/G	0.03321	0.0177	0.0047	0.00015	691634
rs4565538	9:87167374	NTRK2	A/G	0.03327	0.0177	0.0047	0.00015	691634
rs7020767	9:87119828	NTRK2	T/C	0.03701	0.0171	0.0045	0.00015	688531
rs7864887	9:87122083	NTRK2	T/C	0.03701	0.0171	0.0045	0.00015	688065
rs7875610	9:87161332	NTRK2	T/C	0.96673	-0.0177	0.0047	0.00015	688337
rs830620	3:71679148	PROK2	T/C	0.4131	-0.0066	0.0017	0.00015	692356
rs1993118	6:56898034	RAB23	T/C	0.90453	0.0119	0.0031	0.00015	689554
rs4925114	17:17711270	RAI1	A/G	0.3651	-0.007	0.0018	0.00015	683447
rs1121276	1:243710407	SDCCAG8	T/C	0.6553	-0.0066	0.0017	0.00015	775776
rs3788535	22:38534045	SOX10	T/C	0.6574	-0.0069	0.0018	0.00015	690105
rs8140423	22:38195596	SOX10	A/G	0.2218	0.0082	0.0022	0.00015	683663
rs4758322	11:8304015	TUB	T/C	0.3162	-0.0072	0.0019	0.00015	679748
rs10168461	2:63917221	WDPCP	A/G	0.4535	0.0066	0.0017	0.00015	682769
rs17432775	2:63466463	WDPCP	T/C	0.2274	0.0078	0.0021	0.00015	690907
rs1850984	2:63464942	WDPCP	A/G	0.2275	0.0077	0.002	0.00015	691090
rs2392217	7:33118374	BBS9	A/T	0.3163	-0.007	0.0019	0.00016	684198
rs2283496	16:4065992	CREBBP	A/C	0.8469	0.0091	0.0024	0.00016	663004
rs5751069	22:41627775	EP300	C/G	0.7166	-0.0069	0.0018	0.00016	790464
rs2133664	3:46101774	LZTFL1	A/T	0.6396	0.0067	0.0018	0.00016	691985
rs4490403	3:46101257	LZTFL1	T/C	0.3648	-0.0067	0.0018	0.00016	686943
rs13299553	9:87106372	NTRK2	T/C	0.03701	0.017	0.0045	0.00016	688206
rs17087355	9:87157922	NTRK2	T/C	0.96679	-0.0177	0.0047	0.00016	688287
rs7849479	9:87168825	NTRK2	T/G	0.96679	-0.0176	0.0047	0.00016	691650
rs4815800	20:5339502	PROKR2	T/G	0.5534	0.0065	0.0017	0.00016	690625
rs6085126	20:5340039	PROKR2	A/G	0.4465	-0.0066	0.0017	0.00016	690702
rs2167460	6:56884451	RAB23	T/C	0.2042	0.0082	0.0022	0.00016	681151
rs12920521	16:4047700	CREBBP	T/G	0.08057	-0.0124	0.0033	0.00017	642065
rs881300	8:38332298	FGFR1	A/C	0.8639	0.009	0.0024	0.00017	785665
rs4866959	5:42784888	GHR	T/G	0.2976	0.0077	0.002	0.00017	528945
rs6880056	5:42847750	GHR	A/T	0.7551	-0.0075	0.002	0.00017	691696
rs6026546	20:57397994	GNAS	T/C	0.97047	-0.019	0.0051	0.00017	689518
rs9760	20:57571763	GNAS	A/G	0.3604	0.0064	0.0017	0.00017	790311
rs1392295	3:46101104	LZTFL1	A/T	0.6395	0.0067	0.0018	0.00017	692194
rs6774629	3:46142963	LZTFL1	T/C	0.3482	-0.0067	0.0018	0.00017	687076
rs13292400	9:87397008	NTRK2	A/C	0.03607	0.0176	0.0047	0.00017	676407
rs17080621	9:87398104	NTRK2	A/G	0.03613	0.0176	0.0047	0.00017	676418
rs17087628	9:87386499	NTRK2	A/G	0.96363	-0.0176	0.0047	0.00017	688705
rs1778912	9:87307434	NTRK2	A/G	0.5337	0.0065	0.0017	0.00017	691059
rs7856875	9:87127540	NTRK2	T/C	0.03695	0.017	0.0045	0.00017	687377
rs4925109	17:17661802	RAI1	A/G	0.3196	-0.0071	0.0019	0.00017	685849
rs11041827	11:8274699	TUB	T/C	0.4742	-0.0066	0.0018	0.00017	689212
rs6727270	2:73419655	ALMS1	T/C	0.97919	-0.0225	0.006	0.00018	678374
rs10512148	9:87109486	NTRK2	A/C	0.961	-0.0169	0.0045	0.00018	682359
rs13294616	9:87267100	NTRK2	T/C	0.0335	0.0175	0.0047	0.00018	678834
rs13301454	9:87262865	NTRK2	A/C	0.03338	0.0175	0.0047	0.00018	690326
rs17430135	9:87112336	NTRK2	A/G	0.96293	-0.0169	0.0045	0.00018	688288
rs7851325	9:87157156	NTRK2	T/C	0.96679	-0.0176	0.0047	0.00018	688270
rs13027594	2:63362468	WDPCP	A/G	0.362	-0.0068	0.0018	0.00018	683256
rs12926323	16:56582548	BBS2	T/C	0.6069	0.0067	0.0018	0.00019	688412
rs12591728	15:72973268	BBS4	T/G	0.1061	-0.0106	0.0028	0.00019	681166
rs1371390	15:93496874	CHD2	T/C	0.8001	-0.0082	0.0022	0.00019	687602
rs1423649	5:42854473	GHR	T/C	0.7541	-0.0075	0.002	0.00019	691386
rs3849695	5:42853886	GHR	A/G	0.2453	0.0075	0.002	0.00019	689966
rs1874908	12:49584030	KMT2D	A/G	0.3495	0.0068	0.0018	0.00019	692307
rs2133665	3:46101816	LZTFL1	C/G	0.3604	-0.0066	0.0018	0.00019	692007
rs1187350	9:87295237	NTRK2	A/G	0.5336	0.0064	0.0017	0.00019	688463
rs12555182	9:87395111	NTRK2	C/G	0.96416	-0.0174	0.0047	0.00019	688418
rs13287600	9:87395778	NTRK2	T/C	0.96416	-0.0175	0.0047	0.00019	676666
rs13292008	9:87404070	NTRK2	A/G	0.96603	-0.0177	0.0047	0.00019	687578
rs6747307	2:63922893	WDPCP	T/C	0.5609	-0.0065	0.0017	0.00019	687338
rs7829058	8:38332095	FGFR1	C/G	0.1361	-0.009	0.0024	0.0002	779773
rs163802	20:57578852	GNAS	C/G	0.1939	0.0077	0.0021	0.0002	778928
rs2068430	3:45716209	LZTFL1	A/G	0.09144	-0.0114	0.0031	0.0002	680278
rs7029848	9:87114868	NTRK2	A/G	0.96293	-0.0167	0.0045	0.0002	688065
rs9396261	6:56995494	RAB23	A/T	0.91365	0.0118	0.0032	0.0002	692451
rs12951376	17:17752809	RAI1	T/C	0.3127	-0.0067	0.0018	0.0002	791564
rs2076370	22:38463968	SOX10	A/G	0.3811	0.0067	0.0018	0.0002	692491
rs12878963	14:89132264	TTC8	A/T	0.8846	-0.0101	0.0027	0.0002	690533
rs12441946	15:73191863	BBS4	T/C	0.1876	-0.0078	0.0021	0.00021	795062
rs12362949	11:27583521	BDNF	T/C	0.97942	-0.0277	0.0075	0.00021	728517
rs4786452	16:4071658	CREBBP	C/G	0.1535	-0.0091	0.0025	0.00021	648946
rs1423651	5:42856315	GHR	T/C	0.7567	-0.0075	0.002	0.00021	687183
rs1039225	12:49582692	KMT2D	T/G	0.6652	-0.0068	0.0018	0.00021	692475
rs10747564	12:49623979	KMT2D	A/C	0.6801	-0.0069	0.0019	0.00021	679567
rs11140785	9:87466777	NTRK2	A/T	0.4627	0.0065	0.0017	0.00021	682319
rs12552902	9:87401314	NTRK2	A/G	0.96387	-0.0173	0.0047	0.00021	688096
rs1409706	9:87107049	NTRK2	A/G	0.96223	-0.0167	0.0045	0.00021	688530
rs4463503	9:87113527	NTRK2	A/G	0.96293	-0.0167	0.0045	0.00021	688488
rs6782714	3:71684845	PROK2	T/C	0.4127	-0.0066	0.0018	0.00021	679456
rs9370563	6:56969223	RAB23	T/C	0.08571	-0.0118	0.0032	0.00021	692392
rs9396260	6:56982607	RAB23	A/G	0.91283	0.0117	0.0032	0.00021	692346
rs4821733	22:38449394	SOX10	A/G	0.5788	-0.0065	0.0018	0.00021	686304
rs4904492	14:89455682	TTC8	T/C	0.1362	0.0089	0.0024	0.00021	790236
rs1260333	2:27748624	IFT172	A/G	0.4478	-0.0064	0.0017	0.00022	691566
rs2032465	22:37025819	IFT27	A/G	0.6472	-0.007	0.0019	0.00022	618120
rs468022	5:36988252	NIPBL	A/G	0.1576	-0.009	0.0024	0.00022	691474
rs7020597	9:87396407	NTRK2	T/C	0.03613	0.0172	0.0047	0.00022	688182
rs7220132	17:17404586	RAI1	A/G	0.7381	0.0074	0.002	0.00022	687557
rs12028447	1:243617092	SDCCAG8	T/C	0.1091	-0.0103	0.0028	0.00022	683870
rs12127169	1:243615023	SDCCAG8	T/C	0.1087	-0.0103	0.0028	0.00022	683902
rs11041816	11:8243798	TUB	A/G	0.5379	0.0065	0.0018	0.00022	674075
rs11074146	15:93706831	CHD2	C/G	0.7941	-0.0082	0.0022	0.00023	664213
rs13037435	20:57349872	GNAS	A/G	0.8876	0.0102	0.0028	0.00023	678483
rs17078175	3:45710349	LZTFL1	A/G	0.09185	-0.0113	0.0031	0.00023	680770
rs2173640	3:46100496	LZTFL1	A/G	0.3603	-0.0065	0.0018	0.00023	692376
rs9869609	3:46144451	LZTFL1	A/G	0.3483	-0.0067	0.0018	0.00023	686796
rs1998908	9:87096756	NTRK2	C/G	0.94457	-0.0136	0.0037	0.00023	691004
rs16888316	6:56976944	RAB23	T/C	0.08624	-0.0117	0.0032	0.00023	692404
rs9475781	6:56983989	RAB23	A/G	0.91277	0.0116	0.0032	0.00023	692417
rs2076369	22:38463652	SOX10	T/G	0.3814	0.0066	0.0018	0.00023	692638
rs4837955	9:119626482	TRIM32	T/C	0.4668	-0.0064	0.0017	0.00023	687872
rs10867041	9:140551809	EHMT1	T/C	0.1446	-0.0096	0.0026	0.00024	561206
rs12520759	5:42843771	GHR	A/G	0.7533	-0.0073	0.002	0.00024	689990
rs2911711	2:27750546	IFT172	A/T	0.5302	0.0064	0.0017	0.00024	683949
rs3904480	9:87113298	NTRK2	A/T	0.03707	0.0166	0.0045	0.00024	676746
rs9370559	6:56929809	RAB23	C/G	0.08618	-0.0116	0.0032	0.00024	692458
rs4925120	17:17754633	RAI1	T/C	0.6361	0.0066	0.0018	0.00024	691079
rs941448	17:17654542	RAI1	C/G	0.3265	-0.0069	0.0019	0.00024	685446
rs4821735	22:38458969	SOX10	C/G	0.6181	-0.0066	0.0018	0.00024	692159
rs738443	22:38458681	SOX10	A/G	0.6179	-0.0066	0.0018	0.00024	691998
rs4758053	11:8249742	TUB	T/C	0.1201	0.0099	0.0027	0.00024	689181
rs11125947	2:63334101	WDPCP	T/C	0.3196	-0.0069	0.0019	0.00024	684141
rs2276106	11:66105817	BBS1	T/C	0.285	0.0071	0.0019	0.00025	688910
rs2922982	4:123788375	BBS12	A/C	0.95253	-0.0156	0.0042	0.00025	681941
rs7162166	15:72988040	BBS4	A/C	0.8915	0.0103	0.0028	0.00025	687298
rs7719242	5:42844121	GHR	A/T	0.245	0.0073	0.002	0.00025	690103
rs2283989	22:37014697	IFT27	A/G	0.6453	-0.0067	0.0018	0.00025	673176
rs1476137	12:49523713	KMT2D	A/G	0.6539	-0.0067	0.0018	0.00025	686593
rs13294121	9:87112117	NTRK2	T/G	0.96293	-0.0166	0.0045	0.00025	676754
rs1409705	9:87106862	NTRK2	C/G	0.03701	0.0166	0.0045	0.00025	676751
rs9367710	6:56963188	RAB23	T/C	0.08618	-0.0116	0.0032	0.00025	686649
rs3183702	17:17747289	RAI1	A/G	0.3693	-0.0066	0.0018	0.00025	691463
rs6000991	22:38460484	SOX10	T/C	0.3818	0.0066	0.0018	0.00025	692182
rs742396	22:38452254	SOX10	C/G	0.3811	0.0066	0.0018	0.00025	691880
rs10734630	11:8251449	TUB	A/G	0.92002	-0.0117	0.0032	0.00025	690041
rs4237770	11:8275835	TUB	T/C	0.5255	0.0064	0.0017	0.00025	690378
rs6578942	11:8243170	TUB	T/C	0.086	0.0111	0.003	0.00025	692187
rs6727996	2:73416266	ALMS1	A/T	0.97919	-0.0217	0.006	0.00026	690119
rs1563707	4:123795884	BBS12	A/T	0.05233	0.0155	0.0042	0.00026	670337
rs12531637	7:33117500	BBS9	A/T	0.6904	0.0068	0.0019	0.00026	685474
rs2283992	22:37015271	IFT27	A/T	0.3555	0.0066	0.0018	0.00026	690597
rs2070615	12:49218171	KMT2D	A/G	0.4234	-0.0064	0.0017	0.00026	689754
rs7217912	17:56120483	MKS1	A/C	0.1715	0.0085	0.0023	0.00026	690318
rs13295725	9:87094525	NTRK2	C/G	0.94457	-0.0135	0.0037	0.00026	691048
rs7868932	9:87093051	NTRK2	A/G	0.94434	-0.0136	0.0037	0.00026	690955
rs9296861	6:57000936	RAB23	A/G	0.91365	0.0115	0.0032	0.00026	692525
rs9382686	6:57027144	RAB23	T/C	0.91365	0.0115	0.0032	0.00026	692543
rs1052299	17:17750419	RAI1	A/G	0.365	-0.0066	0.0018	0.00026	691763
rs11656665	17:17724789	RAI1	A/G	0.6245	0.0067	0.0018	0.00026	683385
rs2236513	17:17747366	RAI1	A/C	0.3637	-0.0066	0.0018	0.00026	691740
rs10124561	9:119655679	TRIM32	A/C	0.92388	-0.0116	0.0032	0.00026	692188
rs12464471	2:63686428	WDPCP	A/G	0.783	0.0075	0.0021	0.00026	685600
rs1590142	7:33122183	BBS9	T/C	0.2816	-0.007	0.0019	0.00027	677873
rs12447449	16:3880659	CREBBP	A/G	0.96825	-0.0162	0.0045	0.00027	589160
rs11168884	12:49539892	KMT2D	T/C	0.3475	0.0066	0.0018	0.00027	691762
rs11168910	12:49586490	KMT2D	T/C	0.3351	0.0067	0.0018	0.00027	689106
rs1392296	3:46143930	LZTFL1	A/G	0.3489	-0.0065	0.0018	0.00027	686936
rs13287010	9:87396208	NTRK2	A/C	0.96416	-0.017	0.0047	0.00027	688339
rs13292359	9:87096223	NTRK2	A/G	0.94452	-0.0134	0.0037	0.00027	691058
rs17087300	9:87120447	NTRK2	C/G	0.03812	0.0164	0.0045	0.00027	676832
rs1556245	6:57022958	RAB23	A/G	0.0863	-0.0115	0.0032	0.00027	692546
rs7771328	6:57019184	RAB23	A/G	0.0863	-0.0115	0.0032	0.00027	692529
rs9464418	6:56973902	RAB23	T/C	0.91312	0.0115	0.0032	0.00027	692387
rs1108648	17:17750558	RAI1	A/G	0.6335	0.0066	0.0018	0.00027	691637
rs2297508	17:17715317	RAI1	C/G	0.3667	-0.0067	0.0018	0.00027	684132
rs2710648	2:63250825	WDPCP	A/G	0.8035	0.0078	0.0021	0.00027	687938
rs13113338	4:122661021	BBS7	A/T	0.436	-0.0065	0.0018	0.00028	667722
rs7703376	5:42844336	GHR	A/C	0.245	0.0073	0.002	0.00028	690107
rs9687651	5:42843305	GHR	A/G	0.755	-0.0073	0.002	0.00028	690118
rs7957998	12:49574023	KMT2D	A/C	0.6532	-0.0066	0.0018	0.00028	692227
rs1025743	9:87315117	NTRK2	T/C	0.4753	-0.0063	0.0017	0.00028	686931
rs7749960	6:57045556	RAB23	A/C	0.08635	-0.0115	0.0032	0.00028	692596
rs9349845	6:57041124	RAB23	T/C	0.91359	0.0115	0.0032	0.00028	692585
rs9357940	6:57059820	RAB23	T/G	0.91318	0.0115	0.0032	0.00028	691911
rs9367713	6:57001575	RAB23	A/T	0.08635	-0.0115	0.0032	0.00028	692526
rs16960744	17:17755259	RAI1	A/G	0.3614	-0.0065	0.0018	0.00028	691103
rs976529	1:243471462	SDCCAG8	T/C	0.03309	-0.0177	0.0049	0.00028	678582
rs2283993	22:37015329	IFT27	A/G	0.6444	-0.0066	0.0018	0.00029	678746
rs6580702	12:49563266	KMT2D	A/G	0.6583	-0.0066	0.0018	0.00029	686532
rs1545985	3:46005478	LZTFL1	A/G	0.631	0.0064	0.0018	0.00029	686025
rs7612402	3:46039599	LZTFL1	T/C	0.3743	-0.0064	0.0018	0.00029	692050
rs13289538	9:87400217	NTRK2	A/G	0.96305	-0.0169	0.0047	0.00029	688270
rs7855888	9:87452058	NTRK2	T/C	0.7498	-0.0073	0.002	0.00029	674074
rs6782815	3:71676158	PROK2	A/C	0.5872	0.0063	0.0017	0.00029	689821
rs830651	3:71645511	PROK2	T/C	0.591	0.0064	0.0018	0.00029	684715
rs3757296	6:56998023	RAB23	A/G	0.91365	0.0115	0.0032	0.00029	692540
rs9370567	6:57038369	RAB23	A/C	0.91382	0.0115	0.0032	0.00029	692572
rs9475788	6:57057219	RAB23	A/G	0.91376	0.0115	0.0032	0.00029	692505
rs12941039	17:17765655	RAI1	T/C	0.6317	0.0065	0.0018	0.00029	691479
rs11624015	14:89201348	TTC8	T/C	0.8847	-0.0096	0.0026	0.00029	686454
rs7146379	14:89249467	TTC8	T/C	0.1157	0.0096	0.0026	0.00029	692127
rs4441767	4:123800406	BBS12	A/C	0.04654	0.0152	0.0042	0.0003	679357
rs6830581	4:123800932	BBS12	T/G	0.95346	-0.0152	0.0042	0.0003	679359
rs5751023	22:41410267	EP300	A/G	0.243	-0.0073	0.002	0.0003	684133
rs6882786	5:42843103	GHR	A/G	0.2454	0.0072	0.002	0.0003	690005
rs10783308	12:49531458	KMT2D	T/C	0.652	-0.0066	0.0018	0.0003	691917
rs7306084	12:49600610	KMT2D	T/C	0.3078	0.0068	0.0019	0.0003	689028
rs6907653	6:56951361	RAB23	T/C	0.08624	-0.0114	0.0032	0.0003	692505
rs6932278	6:56948182	RAB23	A/G	0.08653	-0.0114	0.0032	0.0003	692502
rs12416020	10:112777189	BBIP1	A/G	0.7111	0.0069	0.0019	0.00031	691221
rs7954521	12:49545640	KMT2D	A/G	0.3475	0.0066	0.0018	0.00031	692084
rs10927022	1:243618064	SDCCAG8	A/G	0.1142	-0.01	0.0028	0.00031	671469
rs7036590	9:119623110	TRIM32	A/T	0.5344	0.0062	0.0017	0.00031	690978
rs10885079	10:112797803	BBIP1	A/G	0.7112	0.0068	0.0019	0.00032	691206
rs163801	20:57578614	GNAS	A/G	0.1964	0.0078	0.0022	0.00032	692031
rs1475985	22:37011648	IFT27	A/G	0.6449	-0.0065	0.0018	0.00032	680881
rs12190867	6:84980756	MRAP2	C/G	0.3389	-0.0066	0.0018	0.00032	689976
rs9296862	6:57051017	RAB23	A/G	0.91411	0.0114	0.0032	0.00032	692168
rs10151451	14:89174292	TTC8	A/G	0.8841	-0.0094	0.0026	0.00032	692116
rs10152428	15:93510243	CHD2	C/G	0.7253	-0.007	0.002	0.00033	688875
rs140527	22:37027680	IFT27	T/C	0.7658	-0.0073	0.002	0.00033	682862
rs2171528	3:46047044	LZTFL1	T/C	0.3744	-0.0063	0.0018	0.00033	690706
rs6441938	3:46045619	LZTFL1	C/G	0.7545	0.0072	0.002	0.00033	689931
rs292181	5:36952576	NIPBL	T/C	0.1651	-0.0084	0.0023	0.00033	691946
rs10114941	9:87443528	NTRK2	C/G	0.04063	0.0161	0.0045	0.00033	677566
[truncated: 16,142 more rows]
