# Supplementary material for: A Candidate-Gene Approach Identifies Novel Associations Between Common Variants in/Near Syndromic Obesity Genes and BMI in Pediatric and Adult European Populations
Source: Oxford University Press journal article supplement (doi:10.2337/db18-0986), 2019-01-28
Supplement: db180986supplementarydata4.xlsx [file db180986supplementarydata4.xlsx]

## Sheet: Tagged.SNPs.results
Supplementary Table 3. Summary statistics of all selected tagSNPs. Significant associations (P<1.01×10-5) are highlighted in grey. Number of tagged SNPs, alleles (effect/other), effect allele frequency (EAF), beta (β), standard error (SE), P values, and number of observations (N) are reported. SNP positions are reported according to Build 37.
SNP	Chr:position	n Tagged SNPs	Gene	Alleles	EAF	β	SE	P	N
rs6265	11:27679916	7	BDNF	T/C	0.1951	-0.0412	0.0021	1e-86	795458
rs7103411	11:27700125	15	BDNF	T/C	0.7841	0.0385	0.002	1.6e-82	795623
rs4074134	11:27647285	16	BDNF	T/C	0.2089	-0.0377	0.002	5.8e-78	795578
rs925946	11:27667202	10	BDNF	T/G	0.3088	0.029	0.0018	2.2e-61	795513
rs4788099	16:28855727	28	SH2B1	A/G	0.5963	-0.0269	0.0017	4.8e-59	795572
rs7359397	16:28885659	27	SH2B1	T/C	0.4021	0.0267	0.0017	4.9e-58	795625
rs10835211	11:27701365	3	BDNF	A/G	0.261	0.0289	0.0019	2e-54	795539
rs1906654	11:27574408	21	BDNF	A/G	0.2404	-0.0287	0.0019	5.3e-51	795589
rs11646653	16:28922149	9	SH2B1	T/C	0.6606	-0.0249	0.0017	1.4e-46	794902
rs7116850	11:27645530	3	BDNF	A/G	0.729	0.0263	0.0018	2.4e-46	795214
rs12577586	11:27600435	21	BDNF	T/C	0.7679	-0.0266	0.0019	8.1e-44	795052
rs12288512	11:27747671	2	BDNF	A/G	0.2028	0.0281	0.002	8.6e-44	794179
rs7481311	11:27583129	20	BDNF	T/C	0.229	0.0262	0.0019	5.9e-42	795364
rs12716974	16:29944832	6	KCTD13	A/G	0.5405	0.022	0.0017	3.4e-37	692535
rs12325539	16:30033633	4	KCTD13	T/C	0.6021	-0.0223	0.0018	4.2e-37	692480
rs9925915	16:29993686	19	KCTD13	C/G	0.4522	0.0216	0.0017	3.8e-36	692501
rs7187575	16:28990101	5	SH2B1	T/C	0.6915	-0.0225	0.0018	6.3e-36	787384
rs2531995	16:4013467	1	CREBBP	T/C	0.6217	0.0222	0.0018	2e-35	692575
rs11030014	11:27480827	5	BDNF	T/C	0.7941	0.0244	0.002	1.7e-33	791633
rs6484307	11:27521743	23	BDNF	A/G	0.2137	-0.0241	0.002	2.6e-33	794154
rs12807253	11:27628269	0	BDNF	A/G	0.09775	-0.0353	0.003	2.2e-32	765699
rs11030026	11:27510830	0	BDNF	A/G	0.1608	0.0265	0.0023	3.4e-30	748090
rs7498491	16:28844068	2	SH2B1	A/T	0.6565	0.0192	0.0017	1e-28	793260
rs4787491	16:30015337	4	KCTD13	A/G	0.4636	-0.0177	0.0017	4.2e-26	739894
rs11030066	11:27618490	0	BDNF	T/C	0.1418	0.0251	0.0024	1.1e-25	782011
rs11150675	16:28980531	4	SH2B1	A/G	0.3505	-0.0179	0.0017	2.1e-25	793549
rs7164727	15:73093991	5	BBS4	T/C	0.681	0.0182	0.0017	3.3e-25	791156
rs3814878	16:30041966	11	KCTD13	A/G	0.5304	-0.0177	0.0017	1.2e-24	692586
rs11647753	16:29928115	1	KCTD13	A/G	0.3817	-0.0178	0.0018	9.6e-24	690444
rs3809624	16:30102802	1	KCTD13	T/C	0.6635	0.0185	0.0019	2.4e-23	689714
rs2444217	16:4038387	0	CREBBP	A/G	0.5695	0.0168	0.0017	1.6e-22	725181
rs11030016	11:27487992	0	BDNF	T/C	0.7357	0.0176	0.0019	2.5e-21	789579
rs12439200	15:73086731	1	BBS4	A/G	0.2271	-0.0189	0.0021	3.3e-20	689092
rs12448257	16:3599655	3	CREBBP	A/G	0.218	0.0184	0.002	8.1e-20	779628
rs2277598	15:73027478	12	BBS4	T/C	0.3559	-0.0161	0.0018	2.2e-19	692591
rs730180	15:73007893	2	BBS4	A/G	0.7886	0.0176	0.002	5.4e-19	792607
rs2531992	16:4021734	0	CREBBP	A/G	0.1504	-0.0198	0.0023	2.3e-18	791181
rs758747	16:3627358	0	CREBBP	T/C	0.2739	0.0158	0.0019	3.1e-17	768256
rs2238439	16:4031348	2	CREBBP	A/G	0.2244	-0.0175	0.0021	3.4e-17	691012
rs4777546	15:73104435	0	BBS4	A/G	0.3811	-0.0149	0.0018	4.3e-17	686669
rs2601777	16:4035068	0	CREBBP	A/G	0.372	-0.0144	0.0017	9.4e-17	778986
rs9806742	15:73051219	7	BBS4	A/G	0.8826	0.0208	0.0026	1.4e-15	692509
rs4658403	1:243832560	0	SDCCAG8	T/C	0.8221	-0.0185	0.0023	1.9e-15	690620
rs1966419	16:4004793	5	CREBBP	A/G	0.4626	-0.0138	0.0018	3.3e-15	688270
rs7552982	1:243737428	14	SDCCAG8	T/C	0.8563	-0.0197	0.0025	5.9e-15	691704
rs9930893	16:3625448	1	CREBBP	A/C	0.4847	-0.0129	0.0017	9.2e-15	778729
rs2010133	15:73101585	1	BBS4	T/C	0.7223	0.0144	0.0019	3.2e-14	690461
rs7171864	15:73227249	2	BBS4	A/G	0.6681	0.0132	0.0017	4.6e-14	786585
rs3850988	15:72989224	2	BBS4	A/G	0.2551	-0.0141	0.0019	4.9e-14	791754
rs17309825	11:27526105	0	BDNF	T/C	0.96018	-0.0312	0.0042	6.8e-14	786406
rs1565228	11:27586436	1	BDNF	C/G	0.91294	-0.0212	0.0028	9.6e-14	794401
rs7200737	16:3711656	0	CREBBP	A/G	0.2605	0.0148	0.002	9.8e-14	677966
rs8026559	15:72976511	0	BBS4	A/T	0.2712	-0.0144	0.0019	1.1e-13	689794
rs3794701	16:3730578	0	CREBBP	A/G	0.4771	-0.0128	0.0017	1.8e-13	682455
rs12917712	16:29882490	1	KCTD13	T/C	0.3296	0.0134	0.0018	3e-13	692496
rs1053874	16:3707747	3	CREBBP	A/G	0.2974	0.013	0.0018	4.1e-13	782167
rs2415168	15:73109629	1	BBS4	A/G	0.7524	0.0134	0.0019	1e-12	791894
rs1057452	16:29833714	11	KCTD13	A/G	0.03713	0.0173	0.0024	1.6e-12	692447
rs10835219	11:27791178	0	BDNF	A/C	0.639	0.013	0.0019	2.2e-12	664064
rs1352162	1:243717682	18	SDCCAG8	A/G	0.3273	0.0122	0.0018	3.9e-12	790792
rs740862	16:3689678	0	CREBBP	T/G	0.7204	-0.0127	0.0018	4.9e-12	772262
rs7178889	15:73111717	3	BBS4	T/C	0.1304	-0.0164	0.0024	5.3e-12	794826
rs2072346	16:4027423	0	CREBBP	T/C	0.8088	0.0153	0.0022	6.1e-12	675193
rs2899809	15:73133045	4	BBS4	A/G	0.438	-0.0113	0.0017	6.2e-12	789764
rs908867	11:27745764	1	BDNF	T/C	0.09594	0.0187	0.0027	6.7e-12	794383
rs7939810	11:27633409	0	BDNF	T/C	0.6377	0.0117	0.0017	7.9e-12	791415
rs8058233	16:3638809	0	CREBBP	A/G	0.2861	0.013	0.0019	1e-11	683189
rs4787483	16:29885447	3	KCTD13	A/G	0.6546	-0.0124	0.0018	1e-11	691316
rs11150582	16:30034127	0	KCTD13	C/G	0.1438	0.0179	0.0026	1.1e-11	622470
rs7189777	16:4002320	0	CREBBP	C/G	0.6204	0.012	0.0018	2.6e-11	688469
rs17183750	16:3709523	0	CREBBP	A/G	0.1742	0.0154	0.0023	2.9e-11	675248
rs11646287	16:3719344	1	CREBBP	T/C	0.3217	0.0123	0.0019	3.9e-11	686323
rs11072392	15:73149658	6	BBS4	T/C	0.5454	0.0114	0.0017	4e-11	692542
rs7523742	1:243688150	0	SDCCAG8	A/G	0.0922	0.0206	0.0031	4.1e-11	691627
rs3810812	16:3639139	1	CREBBP	A/G	0.4877	-0.0114	0.0017	4.3e-11	692565
rs735830	16:3695354	1	CREBBP	A/G	0.2039	0.014	0.0021	4.5e-11	682721
rs108422	6:101039279	42	SIM1	C/G	0.5307	-0.0113	0.0017	6e-11	689275
rs10457809	6:100984400	41	SIM1	T/C	0.4725	0.0112	0.0017	7.5e-11	690549
rs13332500	16:3575270	1	CREBBP	T/G	0.6871	-0.0122	0.0019	8.6e-11	678352
rs1635404	16:3747042	0	CREBBP	T/G	0.6925	0.0121	0.0019	1.6e-10	691805
rs1147194	9:87272731	8	NTRK2	T/C	0.196	-0.0136	0.0022	3.5e-10	692607
rs12933120	16:3634746	0	CREBBP	A/C	0.1389	0.0157	0.0025	3.8e-10	684239
rs2041247	16:4032581	2	CREBBP	T/C	0.1609	-0.0145	0.0023	5.3e-10	678813
rs11792069	9:140646121	0	EHMT1	A/G	0.83	0.0145	0.0024	6.5e-10	644252
rs2997494	1:243614681	0	SDCCAG8	A/G	0.08986	0.0198	0.0032	8e-10	680483
rs1284049	15:73120343	1	BBS4	A/G	0.5039	0.0106	0.0017	8.3e-10	687972
rs7975791	12:49413486	0	KMT2D	T/C	0.03601	-0.0264	0.0043	1.1e-09	770139
rs3006927	1:243657399	1	SDCCAG8	T/C	0.8332	-0.0147	0.0024	1.2e-09	691638
rs2230739	16:4033436	0	CREBBP	T/C	0.6952	-0.0115	0.0019	2.2e-09	650546
rs1619120	9:87302196	7	NTRK2	A/G	0.4013	-0.0099	0.0017	2.4e-09	791760
rs833831	12:49333248	0	KMT2D	T/G	0.8716	0.016	0.0027	2.6e-09	667741
rs240780	6:100964147	12	SIM1	C/G	0.5761	0.0103	0.0017	3e-09	692409
rs747973	16:29875241	0	KCTD13	A/G	0.6949	-0.0113	0.0019	5.6e-09	674448
rs6500548	16:3710537	0	CREBBP	C/G	0.2963	-0.0113	0.0019	5.7e-09	677232
rs2239304	16:4037394	1	CREBBP	A/G	0.263	-0.0116	0.002	6.2e-09	687219
rs5750508	22:38303155	1	SOX10	T/C	0.3224	-0.0108	0.0019	6.3e-09	688225
rs12029086	1:243564722	21	SDCCAG8	T/G	0.1421	-0.0142	0.0025	6.6e-09	692525
rs1136948	16:3721773	0	CREBBP	C/G	0.1819	0.014	0.0024	6.7e-09	518522
rs11649864	17:56093061	1	MKS1	A/G	0.09127	0.0178	0.0031	6.7e-09	663638
rs4671457	2:63346356	2	WDPCP	T/C	0.4166	0.0101	0.0018	7.4e-09	684558
rs11641763	16:3684253	2	CREBBP	A/G	0.6764	-0.0108	0.0019	9.4e-09	678052
rs11168936	12:49645240	0	KMT2D	T/C	0.6553	-0.0104	0.0018	9.9e-09	692324
rs997229	6:101036713	16	SIM1	T/C	0.5489	0.0099	0.0017	1e-08	689120
rs2238443	16:4035897	0	CREBBP	A/G	0.2899	0.0112	0.002	1.1e-08	666441
rs9989424	16:3672587	4	CREBBP	C/G	0.3115	0.0108	0.0019	1.3e-08	671238
rs3790116	16:56388044	10	BBS2	T/C	0.1327	0.0139	0.0024	1.4e-08	791603
rs1857859	6:100894587	10	SIM1	A/G	0.2701	-0.0103	0.0018	1.7e-08	795389
rs1728918	2:27635463	0	IFT172	A/G	0.2717	-0.0114	0.002	2.2e-08	572468
rs1187343	9:87308783	2	NTRK2	A/G	0.6221	0.0099	0.0018	2.3e-08	692591
rs2918626	9:87328983	17	NTRK2	T/C	0.4662	-0.0091	0.0016	2.3e-08	794721
rs1129700	16:29918034	1	KCTD13	T/C	0.4373	-0.0099	0.0018	2.3e-08	677226
rs881301	8:38332318	0	FGFR1	T/C	0.5818	-0.0097	0.0017	2.4e-08	691753
rs1953	22:41641984	6	EP300	T/C	0.2744	-0.0104	0.0019	2.4e-08	781918
rs780094	2:27741237	3	IFT172	T/C	0.3934	-0.0093	0.0017	2.5e-08	795482
rs1054442	12:49389320	0	KMT2D	A/C	0.6178	-0.0103	0.0018	2.5e-08	625990
rs6901944	6:56862805	4	RAB23	A/G	0.8344	-0.0126	0.0023	2.7e-08	692035
rs3829541	16:3730499	1	CREBBP	C/G	0.5402	-0.0097	0.0017	2.9e-08	682952
rs11644679	16:56490549	8	BBS2	A/G	0.1681	0.0122	0.0022	2.9e-08	790999
rs2016661	15:72922676	0	BBS4	T/C	0.6824	0.01	0.0018	3.2e-08	779451
rs10875912	12:49416944	3	KMT2D	T/C	0.6355	-0.01	0.0018	3.3e-08	690454
rs3026659	22:38396220	0	SOX10	T/C	0.3649	-0.01	0.0018	3.4e-08	683489
rs6580699	12:49478812	5	KMT2D	T/G	0.5544	-0.0095	0.0017	3.6e-08	692518
rs7201929	16:28871966	2	SH2B1	T/C	0.7566	0.0105	0.0019	4.6e-08	794892
rs139485	22:41627606	42	EP300	A/G	0.3771	-0.0097	0.0018	5.1e-08	692651
rs2446972	12:49256158	0	KMT2D	C/G	0.4107	0.0097	0.0018	5.7e-08	673374
rs7127273	11:27540084	0	BDNF	T/C	0.04227	0.0218	0.004	6.6e-08	769661
rs8034787	15:73148345	0	BBS4	T/G	0.1583	-0.0124	0.0023	7.5e-08	689444
rs1847912	6:100880696	1	SIM1	A/G	0.7567	0.0108	0.002	7.6e-08	690617
rs11657437	17:56124979	0	MKS1	A/T	0.1099	0.0151	0.0028	8e-08	663383
rs17752670	22:38282897	0	SOX10	T/C	0.2113	-0.0116	0.0022	8.6e-08	679906
rs6910117	6:84971679	0	MRAP2	A/T	0.9099	-0.0157	0.0029	9.1e-08	643225
rs11653839	17:56118994	2	MKS1	A/C	0.1062	0.0155	0.0029	9.3e-08	663828
rs2453472	12:49226743	3	KMT2D	A/C	0.556	0.0088	0.0016	9.9e-08	783453
rs7773661	6:100919209	13	SIM1	A/G	0.4573	-0.0091	0.0017	1.2e-07	692598
rs10868219	9:87246283	0	NTRK2	A/G	0.7178	0.0101	0.0019	1.2e-07	691495
rs2071910	22:38204259	12	SOX10	T/C	0.3107	0.01	0.0019	1.2e-07	692629
rs10173115	2:63355520	0	WDPCP	A/T	0.465	0.0091	0.0017	1.3e-07	684346
rs17309979	11:27852849	0	BDNF	A/G	0.1618	-0.0126	0.0024	1.4e-07	676034
rs2453488	12:49255208	0	KMT2D	T/C	0.3075	0.01	0.0019	1.4e-07	681635
rs10783302	12:49498130	12	KMT2D	T/G	0.3727	0.0095	0.0018	1.5e-07	691013
rs2994322	1:243639018	0	SDCCAG8	C/G	0.8048	-0.0121	0.0023	1.8e-07	672797
rs1919128	2:27801759	15	IFT172	A/G	0.736	0.0096	0.0018	1.8e-07	795625
rs2710642	2:63149557	7	WDPCP	A/G	0.6709	0.009	0.0017	2.2e-07	795445
rs139838	22:38268922	26	SOX10	A/G	0.3851	0.0087	0.0017	2.4e-07	794950
rs12924990	16:3661815	0	CREBBP	T/C	0.8377	-0.012	0.0023	2.6e-07	680508
rs2108430	16:3738078	0	CREBBP	T/C	0.2599	0.0102	0.002	2.7e-07	683601
rs8071036	17:56174500	3	MKS1	A/G	0.8008	-0.0112	0.0022	3.2e-07	692187
rs6026567	20:57444915	0	GNAS	A/G	0.571	-0.0092	0.0018	4.4e-07	659708
rs7513566	1:243588601	20	SDCCAG8	T/C	0.1528	-0.0114	0.0023	5e-07	793570
rs132985	22:38563471	20	SOX10	T/C	0.4711	0.0082	0.0016	5e-07	792079
rs2075375	2:63280690	0	WDPCP	T/C	0.5663	0.0082	0.0016	5.3e-07	788345
rs1881396	2:27844601	13	IFT172	T/G	0.7914	-0.0098	0.002	5.4e-07	795559
rs17765088	3:45943595	0	LZTFL1	C/G	0.8817	-0.0136	0.0027	5.7e-07	666309
rs12447040	16:3718703	0	CREBBP	A/G	0.1097	0.0144	0.0029	5.7e-07	679093
rs12151606	2:63430175	104	WDPCP	T/C	0.6952	-0.0089	0.0018	6.3e-07	792363
rs7959831	12:49474232	1	KMT2D	T/G	0.1477	-0.0122	0.0025	7.2e-07	673479
rs17245314	6:101039215	1	SIM1	T/C	0.753	0.0097	0.002	7.3e-07	686575
rs5756813	22:38175477	2	SOX10	T/G	0.6166	-0.0088	0.0018	8.5e-07	692449
rs1001905	9:87272519	11	NTRK2	A/G	0.108	-0.0136	0.0028	8.7e-07	692574
rs780092	2:27743154	2	IFT172	A/G	0.8458	-0.0107	0.0022	1e-06	795511
rs2072379	16:3738887	0	CREBBP	T/C	0.6697	0.0091	0.0019	1e-06	691256
rs2421916	2:63447682	1	WDPCP	T/G	0.6261	0.0082	0.0017	1.1e-06	787706
rs3778037	6:100844095	20	SIM1	T/C	0.6502	-0.0087	0.0018	1.1e-06	692600
rs4877877	9:87363424	22	NTRK2	C/G	0.304	-0.0092	0.0019	1.1e-06	689238
rs13311608	7:32999601	0	BBS9	A/G	0.5147	-0.0083	0.0017	1.3e-06	688219
rs17087397	9:87170979	45	NTRK2	A/G	0.93814	-0.0173	0.0036	1.3e-06	692499
rs1852029	15:23947116	3	MAGEL2/MKRN3/NDN	T/G	0.515	-0.0085	0.0018	1.3e-06	673355
rs11899999	2:63601292	31	WDPCP	A/G	0.4401	0.0083	0.0017	1.4e-06	692563
rs3810813	16:3639827	0	CREBBP	A/G	0.06174	0.0172	0.0036	1.4e-06	780259
rs5756825	22:38199950	0	SOX10	T/C	0.448	0.0084	0.0017	1.4e-06	691470
rs1031221	2:63742810	93	WDPCP	T/C	0.2875	0.0091	0.0019	1.5e-06	691882
rs699330	15:23936670	2	MAGEL2/MKRN3/NDN	T/G	0.3944	0.0088	0.0018	1.5e-06	658946
rs17279437	3:45814094	2	LZTFL1	A/G	0.1018	0.0134	0.0028	1.6e-06	692329
rs752579	17:17660347	3	RAI1	T/C	0.6077	0.0082	0.0017	1.6e-06	781905
rs9632396	5:37140331	6	NIPBL	T/C	0.2188	-0.0101	0.0021	1.7e-06	692600
rs9607365	22:37061215	13	IFT27	A/C	0.2626	0.0094	0.002	1.7e-06	691952
rs1778933	9:87324411	0	NTRK2	T/C	0.6714	0.0088	0.0018	1.8e-06	691087
rs1124285	16:3589846	0	CREBBP	A/G	0.1933	-0.0108	0.0023	2e-06	659448
rs2284002	22:37060652	6	IFT27	C/G	0.3134	0.0088	0.0019	2.2e-06	692478
rs1500004	3:46150937	0	LZTFL1	A/G	0.1037	0.0143	0.003	2.3e-06	651103
rs11168758	12:49245630	0	KMT2D	A/G	0.7186	0.0091	0.0019	2.4e-06	673165
rs10868231	9:87474397	1	NTRK2	A/G	0.7095	-0.0084	0.0018	2.6e-06	791825
rs2304275	12:49442813	0	KMT2D	T/C	0.699	-0.0092	0.002	2.8e-06	628516
rs11703267	22:41646738	11	EP300	A/G	0.5436	0.0081	0.0017	2.8e-06	692453
rs6702894	1:243608642	0	SDCCAG8	A/G	0.7878	0.0098	0.0021	2.9e-06	691194
rs9403711	6:100824183	10	SIM1	A/G	0.2254	0.0095	0.002	3.2e-06	692606
rs11168854	12:49485373	9	KMT2D	C/G	0.6348	-0.008	0.0017	3.2e-06	791378
rs677488	11:66324762	9	BBS1	T/C	0.5445	-0.008	0.0017	3.3e-06	692582
rs2285179	22:38211954	0	SOX10	A/G	0.5515	-0.0081	0.0017	3.4e-06	685568
rs2235347	22:38522887	0	SOX10	A/G	0.558	-0.0082	0.0018	3.4e-06	691883
rs2601794	16:3989332	0	CREBBP	T/C	0.94715	0.0172	0.0037	3.6e-06	622720
rs2587888	16:56347472	0	BBS2	T/G	0.4992	0.0081	0.0018	3.6e-06	674682
rs17706100	2:27876666	0	IFT172	T/G	0.95644	0.019	0.0041	3.7e-06	769778
rs1488831	11:27637014	2	BDNF	T/G	0.06051	0.0158	0.0034	3.8e-06	787580
rs2422011	2:63774989	91	WDPCP	A/G	0.2847	0.0084	0.0018	4.8e-06	777710
rs1387144	11:27635319	2	BDNF	A/C	0.5938	0.0076	0.0017	4.8e-06	792607
rs11861842	16:30094180	4	KCTD13	T/C	0.06952	-0.0161	0.0035	4.8e-06	690688
rs2550299	16:56380593	3	BBS2	C/G	0.6562	-0.008	0.0017	4.8e-06	788703
rs3026688	22:38463141	2	SOX10	A/C	0.2893	-0.0088	0.0019	4.8e-06	691022
rs12148974	16:4035499	1	CREBBP	A/C	0.112	-0.013	0.0028	5.1e-06	671874
rs4788186	16:29841225	0	KCTD13	A/G	0.3975	-0.0082	0.0018	5.1e-06	671309
rs10209140	2:63922369	4	WDPCP	A/G	0.3623	-0.0081	0.0018	5.3e-06	692415
rs2284063	22:38544298	26	SOX10	A/G	0.6419	-0.0077	0.0017	5.3e-06	794995
rs17244217	11:27791110	0	BDNF	T/G	0.2648	0.0089	0.002	5.4e-06	677654
rs5758211	22:41466229	5	EP300	T/C	0.7816	0.0095	0.0021	6.1e-06	691991
rs10783299	12:49390677	8	KMT2D	T/C	0.6036	-0.0077	0.0017	6.2e-06	746435
rs3891400	4:123736349	1	BBS12	T/G	0.8777	-0.0123	0.0027	6.4e-06	688812
rs3788533	22:38523246	0	SOX10	C/G	0.471	-0.0079	0.0018	6.4e-06	685738
rs129336	22:37155457	6	IFT27	A/C	0.268	-0.0088	0.002	6.6e-06	692642
rs10868213	9:87221357	1	NTRK2	A/C	0.8347	0.0099	0.0022	6.7e-06	792283
rs2126986	16:56351707	1	BBS2	A/G	0.5239	0.0078	0.0017	6.7e-06	678730
rs7225351	17:56155011	3	MKS1	A/G	0.6434	-0.0081	0.0018	7.4e-06	692549
rs10515157	17:56433448	6	MKS1	A/G	0.1779	-0.0102	0.0023	7.6e-06	692506
rs17060562	6:100870786	0	SIM1	T/C	0.96632	-0.0215	0.0048	8e-06	690374
rs2283492	16:4037525	1	CREBBP	T/C	0.2674	0.0089	0.002	8e-06	656782
rs1209068	9:87340518	1	NTRK2	T/C	0.1719	-0.0103	0.0023	8.1e-06	688082
rs7484168	11:8316829	0	TUB	A/C	0.5499	-0.0078	0.0018	8.5e-06	684328
rs12625436	20:57445213	0	GNAS	A/G	0.3944	0.008	0.0018	8.7e-06	680762
rs12675038	8:117706218	1	RAD21	T/C	0.8855	0.0113	0.0025	8.9e-06	794582
rs2072339	16:4039716	0	CREBBP	A/C	0.7901	0.0096	0.0022	9.1e-06	678566
rs1547226	6:57057183	0	RAB23	T/C	0.18	0.0102	0.0023	9.3e-06	685694
rs3818717	17:17707105	0	RAI1	T/C	0.4259	-0.0078	0.0018	9.4e-06	683243
rs486584	11:66358126	11	BBS1	T/C	0.5162	0.0076	0.0017	9.5e-06	692588
rs262527	2:63900292	89	WDPCP	C/G	0.728	-0.0081	0.0018	1e-05	783560
rs10926986	1:243467611	5	SDCCAG8	T/G	0.1567	-0.0105	0.0024	1.1e-05	691322
rs7822206	8:117718976	1	RAD21	A/G	0.2556	-0.0087	0.002	1.1e-05	691280
rs1722793	15:23949665	1	MAGEL2/MKRN3/NDN	T/C	0.6207	-0.0081	0.0018	1.1e-05	672339
rs12470121	2:63633443	24	WDPCP	A/G	0.4187	-0.0071	0.0016	1.2e-05	795505
rs3847766	12:49637566	1	KMT2D	A/T	0.2706	0.0085	0.0019	1.2e-05	691014
rs1359721	9:87119854	0	NTRK2	A/G	0.98252	0.0258	0.0059	1.3e-05	657774
rs4401397	3:45671401	3	LZTFL1	T/C	0.6435	0.0078	0.0018	1.4e-05	682740
rs11140706	9:87248648	14	NTRK2	A/C	0.5508	0.0075	0.0017	1.4e-05	692552
rs1926744	9:87110551	4	NTRK2	A/T	0.94218	-0.0159	0.0037	1.5e-05	689074
rs2278718	2:63815801	13	WDPCP	A/C	0.7535	0.0085	0.002	1.6e-05	692439
rs1471962	3:45949187	0	LZTFL1	C/G	0.1722	0.0102	0.0024	1.6e-05	664262
rs6559823	9:87348215	5	NTRK2	A/G	0.2598	-0.0085	0.002	1.6e-05	691209
rs1881235	11:8103991	0	TUB	A/G	0.96761	-0.0191	0.0044	1.6e-05	677528
rs3800023	6:56965696	12	RAB23	C/G	0.8563	-0.0106	0.0025	1.7e-05	692609
rs10840012	11:8326658	3	TUB	A/G	0.4042	0.0075	0.0018	1.7e-05	686818
rs7190673	16:3665303	0	CREBBP	T/G	0.7495	-0.0087	0.002	1.7e-05	679338
rs11649804	17:17696755	1	RAI1	A/C	0.3032	-0.0082	0.0019	1.7e-05	692243
rs2178198	2:27895073	0	IFT172	T/C	0.1415	-0.0106	0.0025	1.8e-05	785944
rs12119001	1:243601935	17	SDCCAG8	T/C	0.1679	-0.0098	0.0023	1.9e-05	692214
rs6545977	2:63301164	0	WDPCP	A/G	0.4875	-0.0073	0.0017	1.9e-05	692527
rs11950813	5:42742905	54	GHR	A/G	0.2772	0.0082	0.0019	1.9e-05	692150
rs12174666	6:84982208	0	MRAP2	T/C	0.7385	0.0084	0.002	1.9e-05	690034
rs1187327	9:87288540	17	NTRK2	T/C	0.4305	-0.0074	0.0017	1.9e-05	692294
rs10840002	11:8243026	0	TUB	A/G	0.369	0.0078	0.0018	1.9e-05	665858
rs6116750	20:5303842	1	PROKR2	T/C	0.5744	0.0076	0.0018	1.9e-05	678450
rs11646156	16:3648546	0	CREBBP	C/G	0.04876	0.0185	0.0043	2e-05	673599
rs3817588	2:27731212	0	IFT172	T/C	0.8061	-0.0089	0.0021	2.2e-05	783398
rs6702982	1:243608667	10	SDCCAG8	A/G	0.8258	0.0097	0.0023	2.4e-05	691915
rs2446971	12:49262393	0	KMT2D	T/G	0.8645	0.0111	0.0026	2.4e-05	663896
rs3790111	16:56381083	1	BBS2	A/G	0.8895	-0.012	0.0028	2.4e-05	683092
rs7652331	3:45962752	2	LZTFL1	T/C	0.3462	-0.0075	0.0018	2.6e-05	691348
rs10518406	4:123762897	0	BBS12	A/G	0.95627	-0.0183	0.0044	2.7e-05	778486
rs13002109	2:63346702	0	WDPCP	A/C	0.5112	-0.0072	0.0017	2.8e-05	684186
rs6741584	2:63926459	6	WDPCP	T/C	0.5449	-0.0072	0.0017	2.8e-05	688261
rs10122106	9:87126492	3	NTRK2	T/C	0.05741	0.0153	0.0037	2.8e-05	687317
rs12479894	20:57442694	2	GNAS	A/G	0.97205	-0.0218	0.0052	2.8e-05	689394
rs2531748	3:45819837	1	LZTFL1	A/G	0.6601	-0.0079	0.0019	2.9e-05	668052
rs1406713	15:93461263	1	CHD2	C/G	0.1957	0.0092	0.0022	2.9e-05	688196
rs4623938	11:8109415	3	TUB	T/C	0.03221	0.0186	0.0045	3.1e-05	678267
rs742395	22:38447444	11	SOX10	A/G	0.5667	-0.0072	0.0017	3.1e-05	692608
rs4821995	22:41461836	0	EP300	A/G	0.3388	-0.0076	0.0018	3.1e-05	690168
rs2053359	15:93540997	7	CHD2	T/C	0.7444	-0.0083	0.002	3.2e-05	690543
rs6546023	2:63919883	8	WDPCP	T/C	0.743	0.0082	0.002	3.3e-05	685043
rs4394301	7:33049584	0	BBS9	A/G	0.4971	0.0072	0.0017	3.4e-05	689306
rs10203263	2:63454401	11	WDPCP	A/C	0.2267	0.0084	0.002	3.7e-05	692415
rs12900461	15:93552656	14	CHD2	T/C	0.8283	-0.0095	0.0023	3.8e-05	692407
rs4244601	17:17625318	0	RAI1	A/G	0.1359	-0.0103	0.0025	3.8e-05	795255
rs2009667	22:37171611	0	IFT27	A/G	0.4495	-0.0074	0.0018	3.8e-05	674064
rs720856	17:17645951	0	RAI1	C/G	0.7554	0.0086	0.0021	3.9e-05	684368
rs10486527	7:33380673	2	BBS9	T/C	0.6938	0.0073	0.0018	4e-05	792113
rs17060534	6:100862051	9	SIM1	A/G	0.08536	0.0128	0.0031	4.1e-05	692180
rs3774675	3:45667387	0	LZTFL1	T/C	0.7296	-0.0075	0.0018	4.3e-05	788751
rs10817947	9:119633124	0	TRIM32	A/G	0.0791	0.0131	0.0032	4.3e-05	673843
rs1883987	22:37053469	1	IFT27	T/C	0.659	-0.0075	0.0018	4.5e-05	686575
rs181242	17:56203785	1	MKS1	T/G	0.2666	0.0081	0.002	4.6e-05	680829
rs3794699	16:3718728	0	CREBBP	T/C	0.7935	-0.0088	0.0022	4.7e-05	675874
rs132972	22:38562056	0	SOX10	T/C	0.4636	-0.0071	0.0017	4.7e-05	687111
rs3827354	22:38523065	0	SOX10	T/C	0.4028	-0.0072	0.0018	4.8e-05	692557
rs720885	6:56877460	8	RAB23	A/G	0.2146	0.0085	0.0021	4.9e-05	692600
rs10081630	9:87328898	31	NTRK2	A/T	0.03455	0.0187	0.0046	4.9e-05	691161
rs7698	16:30125800	0	KCTD13	A/G	0.07758	-0.0136	0.0034	5e-05	691311
rs139879	22:38364552	18	SOX10	T/C	0.371	0.0072	0.0018	5e-05	692544
rs2553041	2:63238346	0	WDPCP	C/G	0.1953	0.0085	0.0021	5.1e-05	775979
rs10512152	9:87227809	1	NTRK2	A/G	0.97071	-0.0197	0.0049	5.2e-05	675727
rs7929080	11:8302755	1	TUB	A/G	0.2847	-0.0077	0.0019	5.4e-05	691507
rs728633	11:27781979	0	BDNF	A/G	0.7696	-0.0083	0.0021	5.4e-05	679684
rs7171728	15:73050820	2	BBS4	C/G	0.7609	0.0082	0.002	5.4e-05	691243
rs2239305	16:4037918	0	CREBBP	A/G	0.2386	-0.0085	0.0021	5.6e-05	672346
rs11656775	17:17654319	2	RAI1	A/G	0.3268	-0.0071	0.0018	5.6e-05	788532
rs12701265	7:32971236	2	BBS9	A/G	0.4004	0.0071	0.0018	5.7e-05	692513
rs11789677	9:87238610	1	NTRK2	A/G	0.7531	0.0077	0.0019	5.7e-05	791569
rs4821501	22:36954939	0	IFT27	T/C	0.569	-0.0074	0.0018	5.7e-05	635614
rs1439620	15:93429646	2	CHD2	A/G	0.319	0.0071	0.0018	5.8e-05	789595
rs1108659	16:56356034	10	BBS2	C/G	0.1434	0.01	0.0025	5.9e-05	691723
rs10875935	12:49609166	0	KMT2D	A/G	0.2413	0.0081	0.002	6e-05	692013
rs17408037	2:63199709	1	WDPCP	A/G	0.8375	0.0092	0.0023	6.8e-05	688503
rs13284056	9:87171710	35	NTRK2	C/G	0.96919	-0.0189	0.0048	6.9e-05	691139
rs2233908	17:56085257	5	MKS1	A/G	0.1729	0.0092	0.0023	6.9e-05	691191
rs9607759	22:41343839	0	EP300	T/C	0.98831	0.0332	0.0084	7e-05	643198
rs2123010	5:36921325	1	NIPBL	T/C	0.8738	0.0105	0.0026	7.1e-05	691443
rs1535820	6:84978482	8	MRAP2	T/C	0.6582	0.0073	0.0018	7.1e-05	692321
rs1242515	17:17385990	8	RAI1	A/C	0.7316	0.0078	0.002	7.1e-05	691824
rs7118748	11:8291906	1	TUB	T/C	0.8005	-0.0081	0.0021	7.4e-05	791914
rs328300	8:38344499	0	FGFR1	T/G	0.5157	0.0069	0.0017	7.5e-05	680608
rs4238464	15:93701227	4	CHD2	A/G	0.806	-0.0086	0.0022	7.5e-05	691219
rs4237769	11:8275127	4	TUB	A/G	0.4072	-0.007	0.0018	7.7e-05	685237
rs12233949	5:42607461	0	GHR	C/G	0.2946	0.0072	0.0018	7.8e-05	783117
rs4784658	16:56376282	1	BBS2	T/C	0.2611	-0.0074	0.0019	7.9e-05	785214
rs12921697	16:4059746	3	CREBBP	T/C	0.07881	-0.0129	0.0033	8.1e-05	649054
rs2282529	11:66184140	0	BBS1	A/G	0.4303	-0.0069	0.0018	8.2e-05	680835
rs10735819	12:49626490	1	KMT2D	T/C	0.6794	-0.0069	0.0018	8.3e-05	794833
rs4140424	20:5341923	13	PROKR2	T/C	0.4454	-0.0068	0.0017	8.3e-05	692370
rs4777776	15:93696651	4	CHD2	C/G	0.7408	-0.0078	0.002	8.5e-05	691292
rs10759869	9:119621696	1	TRIM32	T/G	0.1133	0.0106	0.0027	8.7e-05	688736
rs4683159	3:46025013	13	LZTFL1	A/G	0.3397	-0.007	0.0018	8.9e-05	692465
rs9810934	3:45954352	10	LZTFL1	A/G	0.2454	-0.0078	0.002	9e-05	692542
rs9306311	22:37050675	3	IFT27	C/G	0.7237	-0.0077	0.002	9.1e-05	680447
rs10875880	12:49244263	0	KMT2D	C/G	0.3308	-0.0073	0.0019	9.4e-05	682863
rs2267348	22:37013167	17	IFT27	C/G	0.2374	0.0078	0.002	9.8e-05	692611
rs1860601	7:33484507	0	BBS9	T/G	0.7423	0.0077	0.002	0.0001	688358
rs11654081	17:17708129	7	RAI1	T/C	0.3651	-0.0071	0.0018	0.0001	685547
rs17663365	3:71683206	2	PROK2	A/G	0.4311	-0.0068	0.0018	0.00011	689923
rs7012413	8:38317398	0	FGFR1	T/C	0.3045	0.0073	0.0019	0.00011	692573
rs4758051	11:8238639	2	TUB	A/G	0.5499	-0.0063	0.0016	0.00011	794732
rs8045276	16:29025978	1	SH2B1	T/C	0.3039	0.0075	0.0019	0.00011	651214
rs9899634	17:17727943	23	RAI1	A/T	0.6335	0.007	0.0018	0.00011	685631
rs2240258	17:56458183	4	MKS1	A/C	0.204	-0.0082	0.0021	0.00011	692491
rs262534	2:63906375	0	WDPCP	A/T	0.3354	0.007	0.0018	0.00012	691231
rs17663591	3:71689923	2	PROK2	T/C	0.2875	-0.0076	0.002	0.00012	667201
rs241816	6:100879651	1	SIM1	T/C	0.6525	0.007	0.0018	0.00012	691277
rs11846241	14:89204354	6	TTC8	T/C	0.2494	0.0076	0.002	0.00012	692122
rs8031691	15:73064927	6	BBS4	A/G	0.8902	0.0107	0.0028	0.00012	691080
rs10499031	6:101036834	1	SIM1	C/G	0.90201	-0.0115	0.003	0.00013	684276
rs12057045	9:87450224	2	NTRK2	A/T	0.7692	-0.0079	0.0021	0.00013	675550
rs1967308	16:4065677	3	CREBBP	T/C	0.1532	-0.0093	0.0024	0.00013	663750
rs2753	12:49521672	21	KMT2D	A/G	0.3459	0.0069	0.0018	0.00014	692591
rs7307435	12:49648666	2	KMT2D	T/C	0.7281	-0.0074	0.002	0.00014	684377
rs17282194	16:56365355	1	BBS2	T/C	0.3631	-0.0069	0.0018	0.00014	687762
rs7503334	17:17779458	49	RAI1	T/C	0.6143	0.0064	0.0017	0.00014	794101
rs1121276	1:243710407	0	SDCCAG8	T/C	0.6553	-0.0066	0.0017	0.00015	775776
rs830620	3:71679148	6	PROK2	T/C	0.4131	-0.0066	0.0017	0.00015	692356
rs10941594	5:42918789	0	GHR	T/C	0.09319	0.0111	0.0029	0.00015	636222
rs7020767	9:87119828	25	NTRK2	T/C	0.03701	0.0171	0.0045	0.00015	688531
rs4758322	11:8304015	0	TUB	T/C	0.3162	-0.0072	0.0019	0.00015	679748
rs6026543	20:57394025	6	GNAS	A/G	0.03017	0.0188	0.005	0.00015	690721
rs8140423	22:38195596	0	SOX10	A/G	0.2218	0.0082	0.0022	0.00015	683663
rs7849479	9:87168825	21	NTRK2	T/G	0.96679	-0.0176	0.0047	0.00016	691650
rs881300	8:38332298	3	FGFR1	A/C	0.8639	0.009	0.0024	0.00017	785665
rs9760	20:57571763	1	GNAS	A/G	0.3604	0.0064	0.0017	0.00017	790311
rs13027594	2:63362468	0	WDPCP	A/G	0.362	-0.0068	0.0018	0.00018	683256
rs12926323	16:56582548	0	BBS2	T/C	0.6069	0.0067	0.0018	0.00019	688412
rs12951376	17:17752809	0	RAI1	T/C	0.3127	-0.0067	0.0018	0.0002	791564
rs163802	20:57578852	4	GNAS	C/G	0.1939	0.0077	0.0021	0.0002	778928
rs12362949	11:27583521	0	BDNF	T/C	0.97942	-0.0277	0.0075	0.00021	728517
rs1039225	12:49582692	22	KMT2D	T/G	0.6652	-0.0068	0.0018	0.00021	692475
rs4904492	14:89455682	3	TTC8	T/C	0.1362	0.0089	0.0024	0.00021	790236
rs12441946	15:73191863	13	BBS4	T/C	0.1876	-0.0078	0.0021	0.00021	795062
rs12127169	1:243615023	3	SDCCAG8	T/C	0.1087	-0.0103	0.0028	0.00022	683902
rs1260333	2:27748624	3	IFT172	A/G	0.4478	-0.0064	0.0017	0.00022	691566
rs11041816	11:8243798	0	TUB	A/G	0.5379	0.0065	0.0018	0.00022	674075
rs2173640	3:46100496	12	LZTFL1	A/G	0.3603	-0.0065	0.0018	0.00023	692376
rs13037435	20:57349872	0	GNAS	A/G	0.8876	0.0102	0.0028	0.00023	678483
rs2076369	22:38463652	6	SOX10	T/G	0.3814	0.0066	0.0018	0.00023	692638
rs11125947	2:63334101	0	WDPCP	T/C	0.3196	-0.0069	0.0019	0.00024	684141
rs10867041	9:140551809	0	EHMT1	T/C	0.1446	-0.0096	0.0026	0.00024	561206
rs4758053	11:8249742	0	TUB	T/C	0.1201	0.0099	0.0027	0.00024	689181
rs6578942	11:8243170	1	TUB	T/C	0.086	0.0111	0.003	0.00025	692187
rs10734630	11:8251449	2	TUB	A/G	0.92002	-0.0117	0.0032	0.00025	690041
rs4237770	11:8275835	2	TUB	T/C	0.5255	0.0064	0.0017	0.00025	690378
rs2276106	11:66105817	0	BBS1	T/C	0.285	0.0071	0.0019	0.00025	688910
rs2070615	12:49218171	0	KMT2D	A/G	0.4234	-0.0064	0.0017	0.00026	689754
rs1590142	7:33122183	0	BBS9	T/C	0.2816	-0.007	0.0019	0.00027	677873
rs13292359	9:87096223	10	NTRK2	A/G	0.94452	-0.0134	0.0037	0.00027	691058
rs12447449	16:3880659	0	CREBBP	A/G	0.96825	-0.0162	0.0045	0.00027	589160
rs976529	1:243471462	0	SDCCAG8	T/C	0.03309	-0.0177	0.0049	0.00028	678582
rs7306084	12:49600610	2	KMT2D	T/C	0.3078	0.0068	0.0019	0.0003	689028
rs12416020	10:112777189	12	BBIP1	A/G	0.7111	0.0069	0.0019	0.00031	691221
rs10114941	9:87443528	2	NTRK2	C/G	0.04063	0.0161	0.0045	0.00033	677566
rs11628848	14:89214194	33	TTC8	A/C	0.1152	0.0094	0.0026	0.00033	692611
rs10152428	15:93510243	8	CHD2	C/G	0.7253	-0.007	0.002	0.00033	688875
rs1040461	6:57055354	27	RAB23	T/C	0.0863	-0.0113	0.0032	0.00034	692606
rs11041861	11:8327286	2	TUB	T/C	0.3466	0.0065	0.0018	0.00034	686699
rs1109859	17:17424333	0	RAI1	A/G	0.8168	0.0086	0.0024	0.00034	665450
rs12951347	17:17534513	6	RAI1	C/G	0.6103	-0.0061	0.0017	0.00034	786683
rs3744115	17:17749822	38	RAI1	A/G	0.6349	0.0064	0.0018	0.00034	692567
rs2413411	22:37012321	11	IFT27	A/G	0.3551	0.0064	0.0018	0.00035	692157
rs7754315	6:100636619	0	SIM1	A/G	0.4355	-0.0064	0.0018	0.00036	680430
rs292179	5:36947613	28	NIPBL	A/G	0.8303	0.0083	0.0023	0.00037	691995
rs13167076	5:37134567	0	NIPBL	A/T	0.0867	-0.0109	0.0031	0.00037	678698
rs11140783	9:87454817	3	NTRK2	T/C	0.08483	0.0112	0.0031	0.00037	692606
rs12904334	15:72842705	1	BBS4	A/G	0.01526	-0.0258	0.0072	0.00037	668174
rs11559241	2:73455600	3	ALMS1	T/C	0.02204	0.0212	0.006	0.00038	690128
rs293774	5:36943268	19	NIPBL	A/G	0.1611	-0.0084	0.0024	0.00039	692296
rs13085087	3:45708081	11	LZTFL1	A/G	0.9092	0.0108	0.0031	0.0004	680773
rs4917576	10:112299896	0	SMC3	A/T	0.1027	-0.0102	0.0029	0.0004	670536
rs292196	5:36914179	26	NIPBL	T/C	0.1655	-0.0083	0.0023	0.00042	692275
rs158793	5:36885090	27	NIPBL	A/G	0.158	-0.0084	0.0024	0.00042	691885
rs2071390	16:30081367	0	KCTD13	T/G	0.1669	-0.0087	0.0025	0.00042	664135
rs1569488	22:36965284	1	IFT27	T/C	0.5582	0.0063	0.0018	0.00042	674462
rs2283984	22:36988584	0	IFT27	A/G	0.6231	-0.0064	0.0018	0.00042	665971
rs1458757	4:123840996	15	BBS12	T/C	0.0463	0.0148	0.0042	0.00043	692458
rs4837952	9:119619937	4	TRIM32	A/G	0.4667	-0.0061	0.0017	0.00043	692574
rs204938	11:8278197	0	TUB	T/C	0.5565	-0.0062	0.0018	0.00043	677887
rs2531967	16:4052486	0	CREBBP	A/G	0.2392	-0.0075	0.0021	0.00043	645177
rs10803143	1:243615589	0	SDCCAG8	T/C	0.2629	-0.0069	0.002	0.00044	682829
rs12338909	9:87581059	0	NTRK2	T/G	0.08197	-0.0114	0.0032	0.00044	682887
rs17114996	15:25245502	43	SNURF	A/G	0.02081	0.0211	0.006	0.00044	688745
rs181217	17:56182846	4	MKS1	T/G	0.2047	0.0075	0.0021	0.00044	691978
rs5756931	22:38546033	2	SOX10	T/C	0.611	-0.0059	0.0017	0.00046	794428
rs2710650	2:63166387	0	WDPCP	A/G	0.01362	-0.0252	0.0072	0.00047	670729
rs10868229	9:87463562	1	NTRK2	A/G	0.501	0.006	0.0017	0.00048	736391
rs2267339	22:36966242	0	IFT27	T/G	0.3362	-0.0065	0.0019	0.00049	657172
rs2490400	1:243492643	0	SDCCAG8	T/C	0.7629	0.0072	0.0021	0.00051	646058
rs315262	5:42888022	0	GHR	T/C	0.7164	-0.0068	0.002	0.00052	683800
rs12592710	15:93694276	1	CHD2	T/C	0.1238	0.0093	0.0027	0.00052	672346
rs899232	16:56356674	8	BBS2	T/C	0.8428	-0.0079	0.0023	0.00056	791025
rs5995341	22:37161320	0	IFT27	T/C	0.06478	-0.0121	0.0035	0.00056	683460
rs4821738	22:38500480	4	SOX10	T/G	0.488	0.0057	0.0016	0.00056	790588
rs972721	2:63361502	2	WDPCP	T/C	0.2479	-0.0065	0.0019	0.0006	788660
rs2531757	3:45850520	0	LZTFL1	A/C	0.3451	0.0063	0.0019	0.00061	662528
rs2085109	11:8310367	0	TUB	C/G	0.4707	0.0058	0.0017	0.00061	766321
rs13147949	4:123838107	2	BBS12	T/C	0.204	0.0071	0.0021	0.00062	794856
rs10983194	9:119255010	0	TRIM32	A/G	0.08764	-0.0105	0.0031	0.00062	673188
rs12467951	2:63292022	0	WDPCP	T/G	0.7851	-0.0073	0.0021	0.00063	692399
rs2539979	2:63200294	2	WDPCP	A/G	0.1853	-0.0075	0.0022	0.00064	690325
rs363053	20:10235585	2	MKKS	T/C	0.95311	-0.0128	0.0038	0.00064	794335
rs7951027	11:8233876	0	TUB	A/G	0.2927	0.0065	0.0019	0.00065	675221
rs11130079	3:45978473	1	LZTFL1	A/G	0.07302	-0.0117	0.0034	0.00067	666626
rs850813	15:23895635	0	MAGEL2/MKRN3/NDN	A/G	0.4463	0.0062	0.0018	0.00068	637647
rs870691	3:72019020	0	PROK2	T/C	0.06905	0.0119	0.0035	0.00071	679117
rs898091	4:123840064	1	BBS12	A/G	0.93808	-0.0113	0.0033	0.00071	793746
rs11953554	5:42846876	9	GHR	T/G	0.2443	0.0068	0.002	0.00071	692204
rs17170180	7:33065102	5	BBS9	T/C	0.6709	0.0062	0.0018	0.00072	689355
rs7271854	20:57447022	0	GNAS	T/C	0.3989	0.0061	0.0018	0.00072	666506
rs12449964	17:17544704	3	RAI1	T/C	0.4464	0.0055	0.0016	0.00075	792570
rs4683158	3:46010077	17	LZTFL1	T/C	0.7686	0.0067	0.002	0.00077	692447
rs2710647	2:63213970	0	WDPCP	T/C	0.4495	-0.0058	0.0017	0.0008	689568
rs11125946	2:63298150	0	WDPCP	A/G	0.2705	-0.0065	0.0019	0.0008	689783
rs1936433	9:87255047	2	NTRK2	T/C	0.1366	-0.0084	0.0025	0.0008	691655
rs11140720	9:87272824	3	NTRK2	A/C	0.91382	0.0103	0.0031	0.00082	692490
rs1875227	16:56598615	0	BBS2	T/C	0.06835	0.011	0.0033	0.00082	780241
rs234632	20:57482070	0	GNAS	T/G	0.9651	0.0168	0.005	0.00082	661787
rs11140707	9:87250190	1	NTRK2	A/G	0.3047	-0.0063	0.0019	0.00083	692230
rs2074800	16:3725682	1	CREBBP	A/G	0.04946	0.014	0.0042	0.00085	677338
rs12424648	12:76725000	0	BBS10	A/G	0.0442	0.012	0.0036	0.00086	766646
rs8054755	16:3741122	0	CREBBP	T/C	0.03853	0.0158	0.0047	0.00087	666109
rs2710635	2:63201714	0	WDPCP	A/T	0.97989	0.0193	0.0058	0.00089	675000
rs10004506	4:123734500	5	BBS12	A/G	0.02198	0.0206	0.0062	0.00089	676232
rs4821513	22:37013819	18	IFT27	T/C	0.7364	-0.0065	0.002	0.00091	691575
rs10119181	9:87475368	7	NTRK2	T/G	0.8637	-0.0079	0.0024	0.00094	790562
rs10767643	11:27496161	2	BDNF	T/G	0.95095	-0.0123	0.0037	0.00094	794427
rs7580520	2:63909178	0	WDPCP	T/C	0.6946	-0.0063	0.0019	0.00095	675433
rs12369505	12:49277050	2	KMT2D	A/C	0.7364	-0.0062	0.0019	0.00096	765274
rs738518	22:37119800	0	IFT27	T/C	0.7349	0.0066	0.002	0.00096	682346
rs7659943	4:122665560	6	BBS7	A/G	0.3999	0.0058	0.0017	0.00097	692156
rs7871278	9:87135644	0	NTRK2	A/G	0.2847	0.0063	0.0019	0.00097	691188
rs17309972	11:27838116	0	BDNF	A/G	0.1437	0.0089	0.0027	0.00097	644337
rs12936587	17:17543722	2	RAI1	A/G	0.4536	0.0054	0.0016	0.00097	794884
rs10254276	7:33297773	12	BBS9	T/C	0.94697	-0.0126	0.0038	0.001	689449
rs4617543	11:27482352	1	BDNF	T/C	0.05233	0.0117	0.0036	0.001	791725
rs7560499	2:63983802	0	WDPCP	T/C	0.8635	-0.0083	0.0025	0.0011	686038
rs9875616	3:45979877	1	LZTFL1	A/G	0.7133	0.0061	0.0019	0.0011	691593
rs4833838	4:123550698	0	BBS12	A/G	0.96246	0.0146	0.0045	0.0011	672754
rs10885070	10:112729375	13	BBIP1	A/G	0.6842	0.0061	0.0019	0.0011	691012
rs11195426	10:112869730	0	BBIP1	C/G	0.6408	0.0059	0.0018	0.0011	681273
rs6546028	2:64060658	0	WDPCP	C/G	0.95627	-0.0131	0.004	0.0012	675196
rs2531742	3:45841068	1	LZTFL1	A/G	0.4096	0.0057	0.0018	0.0012	692550
rs10780680	9:87160754	12	NTRK2	A/G	0.242	0.0065	0.002	0.0012	692566
rs6421063	11:8299883	0	TUB	T/C	0.5175	-0.0058	0.0018	0.0012	658382
rs10852637	16:3718492	0	CREBBP	T/C	0.4588	-0.0058	0.0018	0.0012	671782
rs6565261	16:28903656	3	SH2B1	A/C	0.2891	-0.006	0.0018	0.0012	773743
rs17355357	16:56400976	6	BBS2	T/C	0.245	-0.0065	0.002	0.0012	692575
rs982899	17:56225712	0	MKS1	T/C	0.6768	-0.0061	0.0019	0.0012	680237
rs6085092	20:5300006	1	PROKR2	T/C	0.5699	0.0057	0.0018	0.0012	681338
rs218468	20:57222369	1	GNAS	C/G	0.8516	-0.008	0.0025	0.0012	683554
rs1517408	2:63490493	8	WDPCP	A/G	0.4914	0.0052	0.0016	0.0013	793291
rs13396747	2:170397635	4	BBS5	A/C	0.03315	-0.0146	0.0045	0.0013	786720
rs2673023	3:45711367	4	LZTFL1	T/C	0.2558	0.0062	0.0019	0.0013	691550
rs308447	4:123738546	0	BBS12	T/C	0.3689	0.0058	0.0018	0.0013	692499
rs7093689	10:112146910	0	SMC3	A/G	0.6473	-0.006	0.0019	0.0013	664917
rs2145710	14:89392752	0	TTC8	A/G	0.7021	-0.0061	0.0019	0.0013	678000
rs3794700	16:3718848	0	CREBBP	A/G	0.07805	0.0106	0.0033	0.0013	674469
rs6139697	20:5326578	4	PROKR2	T/C	0.2201	0.0069	0.0021	0.0013	690264
rs218466	20:57216781	1	GNAS	A/G	0.679	-0.006	0.0019	0.0013	692488
rs235189	20:57540782	0	GNAS	C/G	0.7107	-0.0064	0.002	0.0013	663912
rs926914	22:41418154	30	EP300	T/C	0.2824	0.0059	0.0018	0.0013	792326
rs4490404	3:46101371	23	LZTFL1	T/C	0.254	-0.0062	0.0019	0.0014	692079
rs308411	4:123752347	11	BBS12	A/G	0.97901	-0.0199	0.0062	0.0014	676717
rs1982570	4:123824473	0	BBS12	T/G	0.06472	0.0114	0.0036	0.0014	691504
rs3843532	7:33154447	0	BBS9	T/C	0.2442	-0.0066	0.0021	0.0014	668551
rs130038	16:3857035	0	CREBBP	T/G	0.94124	0.0131	0.0041	0.0014	618054
rs1109027	2:63815206	9	WDPCP	A/G	0.7758	0.0065	0.002	0.0015	691974
rs4554233	5:42619316	6	GHR	A/G	0.8072	0.007	0.0022	0.0015	692381
rs17395534	7:33234331	1	BBS9	A/G	0.94826	-0.0116	0.0036	0.0015	777987
rs1662695	9:87405212	1	NTRK2	A/G	0.8699	0.0079	0.0025	0.0015	773832
rs11168777	12:49282143	0	KMT2D	T/C	0.01836	0.0195	0.0061	0.0015	646989
rs6497029	15:93699190	0	CHD2	A/G	0.597	-0.0057	0.0018	0.0015	676510
rs11647778	16:4051380	2	CREBBP	C/G	0.46	-0.0057	0.0018	0.0015	643729
rs4646404	17:17420199	0	RAI1	A/G	0.3527	0.0057	0.0018	0.0015	764682
rs2680701	17:56438301	13	MKS1	A/G	0.2	0.0069	0.0022	0.0015	692519
rs10737887	1:243424146	9	SDCCAG8	T/C	0.1292	-0.0083	0.0026	0.0016	692514
rs2137497	4:123558254	0	BBS12	T/G	0.393	-0.0056	0.0018	0.0016	689838
rs2279865	11:66203025	33	BBS1	A/C	0.7497	0.0059	0.0019	0.0016	794708
rs7170052	15:93457650	1	CHD2	T/C	0.7515	0.0064	0.002	0.0016	674631
rs10210482	2:64058713	0	WDPCP	T/C	0.95615	-0.0137	0.0044	0.0017	671474
rs1891628	9:140477812	9	EHMT1	A/G	0.1975	0.0066	0.0021	0.0017	774508
rs17618045	2:63793255	10	WDPCP	T/C	0.7762	0.0064	0.002	0.0018	691288
rs11785698	8:96089420	2	C8orf37	C/G	0.276	0.0061	0.002	0.0018	681854
rs16959558	16:56576069	0	BBS2	T/C	0.8403	-0.0072	0.0023	0.0018	767835
rs2267341	22:36976975	1	IFT27	T/C	0.6693	-0.0059	0.0019	0.0018	684013
rs139520	22:41660964	6	EP300	A/G	0.2209	0.0064	0.0021	0.0018	691522
rs1850983	2:63448724	0	WDPCP	C/G	0.97539	0.017	0.0055	0.0019	689359
rs7790246	7:32976416	6	BBS9	T/C	0.2798	-0.006	0.0019	0.0019	692512
rs6462473	7:33418376	0	BBS9	A/C	0.2211	-0.0065	0.0021	0.0019	688929
rs10098852	8:100921303	1	VPS13B	A/G	0.638	0.0057	0.0018	0.0019	692470
rs11140745	9:87355358	28	NTRK2	T/C	0.341	-0.0057	0.0018	0.002	687720
rs7104520	11:8301191	0	TUB	T/C	0.92511	-0.0106	0.0034	0.002	654382
rs7122225	11:8239818	0	TUB	A/G	0.1555	0.0074	0.0024	0.0021	672512
rs2761413	14:89531341	0	TTC8	T/G	0.7471	-0.0062	0.002	0.0021	674814
rs3867499	15:25119954	0	NPAP1/SNURF	T/C	0.546	-0.0054	0.0018	0.0021	659819
rs4833769	4:122672970	12	BBS7	T/G	0.4422	-0.0053	0.0017	0.0022	690196
rs11965193	6:56984698	0	RAB23	T/C	0.1239	-0.0082	0.0027	0.0022	685219
rs3759870	15:73019968	12	BBS4	A/G	0.90792	0.0091	0.003	0.0022	692240
rs12446940	16:3962620	0	CREBBP	A/G	0.3614	-0.0057	0.0019	0.0022	638663
rs4821721	22:38244216	0	SOX10	T/C	0.8983	-0.0092	0.003	0.0022	676270
rs308381	4:123783105	0	BBS12	A/G	0.95884	-0.0134	0.0044	0.0023	677934
rs11601177	11:8232185	0	TUB	C/G	0.2026	0.0066	0.0022	0.0023	668907
rs7205278	16:29754683	0	KCTD13	T/C	0.8179	-0.007	0.0023	0.0023	654527
rs897453	17:17425631	0	RAI1	T/C	0.4587	0.0053	0.0018	0.0023	667701
rs151343	20:57583298	0	GNAS	C/G	0.3858	0.0055	0.0018	0.0023	682135
rs9851400	3:45723890	0	LZTFL1	C/G	0.566	-0.0053	0.0017	0.0024	680779
rs9357941	6:57074911	1	RAB23	A/G	0.05022	-0.0127	0.0042	0.0024	688308
rs6996321	8:38322346	3	FGFR1	A/G	0.3849	-0.005	0.0017	0.0024	795544
rs2446995	12:49218546	0	KMT2D	A/G	0.05496	-0.0129	0.0042	0.0024	648495
rs4076212	4:122799461	0	BBS7	A/T	0.8709	0.0081	0.0027	0.0025	652149
rs1458758	4:123835879	4	BBS12	T/G	0.2231	0.006	0.002	0.0025	793308
rs1441751	9:119536659	0	TRIM32	A/G	0.03765	0.0142	0.0047	0.0025	662833
rs11600009	11:66253475	0	BBS1	T/C	0.03502	-0.0147	0.0049	0.0025	671780
rs17347262	16:56341230	0	BBS2	A/G	0.5032	-0.0054	0.0018	0.0025	670221
rs1478477	16:56343329	1	BBS2	A/G	0.5004	-0.0053	0.0017	0.0025	691574
rs2235346	22:38518229	2	SOX10	T/G	0.5025	0.0052	0.0017	0.0025	691746
rs5751022	22:41407165	0	EP300	A/G	0.204	-0.0065	0.0022	0.0025	683550
rs2225067	9:119633968	0	TRIM32	T/C	0.5127	-0.0053	0.0018	0.0026	670279
rs1020697	17:17411030	0	RAI1	A/G	0.91639	0.0103	0.0034	0.0026	688490
rs4815797	20:5338636	4	PROKR2	T/C	0.7562	0.006	0.002	0.0026	690774
rs6123836	20:57448746	1	GNAS	T/C	0.3563	0.0053	0.0018	0.0026	762299
rs13431584	2:63514651	0	WDPCP	A/G	0.474	0.0052	0.0017	0.0027	690011
rs12173390	6:57089708	0	RAB23	A/T	0.04373	-0.0141	0.0047	0.0027	682331
rs6468697	8:100870382	0	VPS13B	A/G	0.7882	-0.006	0.002	0.0027	765573
rs12236506	9:119415142	8	TRIM32	C/G	0.91558	0.009	0.003	0.0027	692302
rs943306	9:119624675	0	TRIM32	T/C	0.3995	0.0053	0.0018	0.0027	688384
rs3825065	11:66311011	34	BBS1	A/G	0.7469	0.0057	0.0019	0.0027	788492
rs10875934	12:49602205	0	KMT2D	A/G	0.7557	-0.0061	0.002	0.0027	688456
rs12944679	17:56372280	9	MKS1	T/C	0.2403	0.0061	0.002	0.0027	692598
rs12452417	17:56367202	13	MKS1	A/G	0.165	0.007	0.0023	0.0027	692522
rs2143694	22:41584351	15	EP300	A/G	0.3376	0.0055	0.0018	0.0027	692640
rs4295278	4:123547541	0	BBS12	T/C	0.94446	0.0113	0.0038	0.0028	674086
rs2109526	7:33511742	2	BBS9	T/G	0.1748	0.0069	0.0023	0.0028	678907
rs6730863	2:63939417	5	WDPCP	T/C	0.7509	-0.0059	0.002	0.0029	692489
rs4060029	8:96442676	0	C8orf37	T/C	0.7751	-0.0062	0.0021	0.0029	680830
rs13268448	8:117679638	15	RAD21	T/C	0.3263	-0.0055	0.0019	0.0029	692224
rs10780690	9:87478172	2	NTRK2	T/G	0.5182	0.0052	0.0017	0.0029	684904
rs2281331	22:41745355	0	EP300	A/G	0.5078	-0.0052	0.0017	0.0029	685516
rs1829524	2:63407893	5	WDPCP	T/C	0.2032	0.0064	0.0022	0.003	690300
rs9998785	4:122728965	14	BBS7	A/T	0.614	0.0052	0.0018	0.003	692446
rs7711452	5:37216837	10	NIPBL	T/C	0.3643	-0.0053	0.0018	0.003	692110
rs1118430	5:42350736	30	GHR	C/G	0.325	-0.0054	0.0018	0.003	692261
rs10817917	9:119406202	10	TRIM32	T/C	0.06969	-0.0098	0.0033	0.003	692078
rs7852475	9:140698856	0	EHMT1	T/C	0.6222	-0.0055	0.0018	0.003	666526
rs11593300	10:112132730	0	SMC3	A/G	0.1587	0.0071	0.0024	0.003	686609
rs3117620	14:89463748	7	TTC8	A/G	0.1886	0.0063	0.0021	0.003	783190
rs8062645	16:56606138	3	BBS2	T/C	0.6573	0.0054	0.0018	0.003	691947
rs906496	4:122833314	18	BBS7	T/C	0.3312	-0.0054	0.0018	0.0031	692534
rs17087959	9:87575920	0	NTRK2	T/C	0.8266	0.007	0.0024	0.0031	677872
rs17127310	10:112137261	0	SMC3	A/G	0.2622	0.006	0.002	0.0031	680193
rs1042359	11:8246181	0	TUB	A/G	0.838	-0.0069	0.0023	0.0031	690279
rs7035176	9:119577258	0	TRIM32	C/G	0.2381	0.0061	0.0021	0.0033	680533
rs7035794	9:119652497	4	TRIM32	T/C	0.06303	0.0102	0.0035	0.0033	692486
rs850817	15:23893689	4	MAGEL2/MKRN3/NDN	A/G	0.5911	0.0053	0.0018	0.0033	683498
rs285744	15:93239656	3	CHD2	T/C	0.1718	0.0068	0.0023	0.0033	684576
rs17778117	20:5330878	5	PROKR2	T/C	0.7717	0.006	0.0021	0.0033	686410
rs3025873	20:10269040	0	MKKS	C/G	0.2032	0.0064	0.0022	0.0033	690929
rs1024626	3:45902844	0	LZTFL1	A/G	0.93224	0.0115	0.0039	0.0034	675743
rs1800900	20:57415110	2	GNAS	A/G	0.3593	-0.005	0.0017	0.0034	792624
rs6735699	2:63794888	0	WDPCP	T/G	0.0159	-0.0174	0.006	0.0035	655577
rs10949013	6:57129687	7	RAB23	A/G	0.1136	-0.0081	0.0028	0.0035	692265
rs181225	17:56191100	3	MKS1	A/G	0.7317	-0.0057	0.002	0.0035	689578
rs7285742	22:36980102	0	IFT27	A/G	0.3682	-0.0054	0.0018	0.0035	674355
rs999540	22:37121101	0	IFT27	A/G	0.1897	-0.0066	0.0023	0.0036	683785
rs5756339	22:37166457	8	IFT27	T/C	0.7972	0.0063	0.0022	0.0036	692492
rs12079656	1:243453119	33	SDCCAG8	T/G	0.3292	0.0053	0.0018	0.0037	692542
rs13171019	5:42792587	24	GHR	T/C	0.8379	0.0067	0.0023	0.0037	691391
rs6576608	15:23909626	0	MAGEL2/MKRN3/NDN	A/G	0.4521	-0.0052	0.0018	0.0037	670177
rs12595857	16:4062592	1	CREBBP	A/G	0.5586	0.0052	0.0018	0.0037	659450
rs12660889	6:57163226	0	RAB23	A/G	0.93639	0.0106	0.0037	0.0039	678360
rs3760183	17:17400972	0	RAI1	T/G	0.1163	-0.0079	0.0028	0.0039	692411
rs7273251	20:57450415	0	GNAS	T/C	0.02958	0.016	0.0055	0.0039	540501
rs12441631	15:93715500	0	CHD2	A/G	0.7607	-0.0061	0.0021	0.004	637068
rs12005792	9:87236739	0	NTRK2	T/C	0.7761	0.0061	0.0021	0.0041	678416
rs1596360	9:87579148	2	NTRK2	A/G	0.2692	-0.0057	0.002	0.0041	683456
rs11137140	9:140488857	0	EHMT1	C/G	0.654	0.0054	0.0019	0.0041	670182
rs2061037	11:8266629	0	TUB	A/G	0.4435	0.0052	0.0018	0.0041	669941
rs11030134	11:27786474	5	BDNF	T/C	0.6249	-0.0051	0.0018	0.0041	679716
rs4777560	15:73145702	6	BBS4	A/C	0.1138	-0.0073	0.0026	0.0041	793169
rs236696	20:57661074	0	GNAS	T/C	0.96048	0.0143	0.005	0.0041	658348
rs6116721	20:5255078	1	PROKR2	T/G	0.6162	0.0051	0.0018	0.0042	692368
rs7813370	8:38399485	0	FGFR1	A/G	0.08694	-0.0089	0.0031	0.0043	691262
rs4877894	9:87590382	5	NTRK2	A/G	0.571	0.0049	0.0017	0.0043	692056
rs12903451	15:23986218	2	MAGEL2/MKRN3/NDN	T/G	0.07098	-0.0099	0.0035	0.0043	641700
rs4784650	16:56306640	5	BBS2	A/G	0.6622	0.0052	0.0018	0.0043	692513
rs7212803	17:56214094	0	MKS1	A/T	0.08945	0.0086	0.003	0.0043	677252
rs1324089	6:84965282	0	MRAP2	T/C	0.2397	-0.0058	0.0021	0.0044	688882
rs240768	6:100957344	15	SIM1	T/C	0.95089	0.0108	0.0038	0.0044	795033
rs11779506	8:96074902	1	C8orf37	T/C	0.8272	-0.0061	0.0022	0.0044	795100
rs7583698	2:27712408	2	IFT172	T/C	0.05443	0.0104	0.0036	0.0045	781112
rs301961	3:97392702	1	ARL6	T/G	0.869	-0.0072	0.0025	0.0046	679174
rs10867067	9:140680532	11	EHMT1	A/G	0.6292	-0.0051	0.0018	0.0046	689780
rs8047038	16:4111525	0	CREBBP	A/G	0.2457	-0.0057	0.002	0.0046	682541
rs4646371	17:17460674	4	RAI1	A/G	0.4533	0.0046	0.0016	0.0046	787261
rs2683451	2:170384532	3	BBS5	A/G	0.5545	-0.0046	0.0016	0.0047	793529
rs2276611	2:170441001	27	BBS5	A/G	0.1296	0.0071	0.0025	0.0047	692578
rs6945242	7:32973818	0	BBS9	A/C	0.1688	-0.0065	0.0023	0.0047	677360
rs7802391	7:33560825	0	BBS9	T/G	0.02496	0.0152	0.0054	0.0047	664795
rs2994329	1:243647921	4	SDCCAG8	T/C	0.1961	-0.006	0.0021	0.0048	692587
rs4866801	5:42829634	26	GHR	A/G	0.5765	0.0047	0.0017	0.0048	793360
rs13194787	6:84722195	0	MRAP2	A/C	0.09559	-0.0076	0.0027	0.0048	626910
rs3798508	6:100853964	0	SIM1	T/C	0.2065	0.0058	0.0021	0.0048	736120
rs11076152	16:56384687	0	BBS2	T/G	0.05309	0.0111	0.004	0.0049	672582
rs2108917	3:45809843	1	LZTFL1	A/G	0.2623	0.0055	0.0019	0.005	686295
rs329215	9:87804001	4	NTRK2	T/C	0.7518	-0.0057	0.002	0.005	691048
rs110420	11:8253049	2	TUB	T/C	0.4773	0.0046	0.0017	0.005	792278
rs2145095	20:5317586	4	PROKR2	A/G	0.3913	0.005	0.0018	0.005	684189
rs2283981	22:36986092	0	IFT27	T/C	0.6664	-0.0049	0.0017	0.005	795087
rs6983315	8:38299419	2	FGFR1	A/G	0.4294	-0.0049	0.0018	0.0051	691811
rs704249	3:71657226	1	PROK2	T/G	0.4998	0.0048	0.0017	0.0052	692424
rs4866792	5:42651224	23	GHR	T/C	0.8338	0.0065	0.0023	0.0052	692538
rs10868207	9:87190559	2	NTRK2	A/C	0.6943	-0.0052	0.0019	0.0052	690771
rs7219320	17:17880877	21	RAI1	A/G	0.6675	0.0049	0.0017	0.0052	795337
rs7129	3:45959759	15	LZTFL1	T/C	0.5908	-0.0049	0.0017	0.0053	692607
rs13188386	5:42473555	4	GHR	A/G	0.2665	-0.0054	0.0019	0.0053	692497
rs551708	11:66486143	0	BBS1	T/C	0.321	-0.0052	0.0018	0.0053	690900
rs6116751	20:5325472	1	PROKR2	T/C	0.526	0.0048	0.0017	0.0054	684957
rs132928	22:38486738	3	SOX10	T/C	0.5187	-0.0048	0.0017	0.0054	691372
rs1625595	11:66078129	0	BBS1	T/C	0.4791	0.0048	0.0017	0.0055	692393
rs129968	16:3791261	1	CREBBP	A/G	0.3499	0.0051	0.0018	0.0055	691938
rs704259	3:71699114	1	PROK2	T/C	0.4287	0.005	0.0018	0.0056	658959
rs3812552	9:139256468	1	INPP5E	C/G	0.8893	-0.0077	0.0028	0.0056	678127
rs11609220	12:88663313	0	CEP290	C/G	0.93744	0.0108	0.0039	0.0056	596024
rs12193789	6:101102585	0	SIM1	T/G	0.1252	0.0073	0.0026	0.0058	773984
rs943309	9:119599526	21	TRIM32	A/G	0.1575	0.0061	0.0022	0.0059	795031
rs7396690	11:8115762	0	TUB	C/G	0.04408	0.0104	0.0038	0.0059	614097
rs1535822	6:84978033	0	MRAP2	A/T	0.6163	0.0049	0.0018	0.006	686569
rs1387926	9:87632663	3	NTRK2	T/C	0.1414	-0.0068	0.0025	0.006	690985
rs12005738	9:140373303	0	EHMT1	T/C	0.3127	-0.0055	0.002	0.006	631899
rs553668	10:112839579	0	BBIP1	A/G	0.1615	-0.0067	0.0024	0.006	636744
rs2446991	12:49240791	4	KMT2D	T/G	0.8876	0.0076	0.0028	0.0062	691519
rs12912091	15:24004831	1	MAGEL2/MKRN3/NDN	T/C	0.06858	-0.0099	0.0036	0.0062	645274
rs3774642	3:45937782	1	LZTFL1	C/G	0.93312	-0.0091	0.0033	0.0063	691907
rs8125112	20:57431165	0	GNAS	T/C	0.842	-0.0064	0.0024	0.0063	688347
rs10759860	9:119544455	0	TRIM32	T/G	0.2689	-0.0054	0.002	0.0064	691452
rs16957315	15:73104258	7	BBS4	A/G	0.1033	-0.0073	0.0027	0.0064	792868
rs13147359	4:123597171	0	BBS12	T/C	0.97468	-0.0135	0.0049	0.0065	653950
rs3123510	9:140636333	0	EHMT1	A/G	0.4174	0.0048	0.0018	0.0065	685652
rs1565933	12:49255798	2	KMT2D	C/G	0.4623	-0.0047	0.0017	0.0065	692430
rs13023094	2:27910706	1	IFT172	A/C	0.7849	0.0055	0.002	0.0066	794229
rs2064061	3:45871203	1	LZTFL1	A/G	0.5174	-0.0047	0.0017	0.0066	692542
rs2923814	8:96091640	18	C8orf37	T/C	0.5528	-0.0044	0.0016	0.0066	795581
rs11140686	9:87224505	2	NTRK2	T/C	0.123	-0.0072	0.0026	0.0066	692180
rs1507995	4:122748308	19	BBS7	A/G	0.3178	0.0048	0.0018	0.0067	795043
rs6996516	8:96120887	1	C8orf37	A/G	0.2012	0.0058	0.0021	0.0067	691496
rs11503324	12:88415845	0	CEP290	T/C	0.01345	0.0244	0.009	0.0067	509760
rs2272461	15:93522312	0	CHD2	A/G	0.6747	-0.0051	0.0019	0.0067	675034
rs17285449	16:56596155	3	BBS2	T/G	0.08986	0.0084	0.0031	0.0067	680800
rs862016	20:57551099	1	GNAS	A/G	0.92785	-0.0093	0.0034	0.0068	678495
rs715541	22:37116098	1	IFT27	A/G	0.6438	0.0049	0.0018	0.0068	689940
rs1566441	16:56597636	0	BBS2	T/G	0.5285	-0.0047	0.0018	0.0069	677693
rs7857887	9:87172960	0	NTRK2	A/G	0.96895	-0.0144	0.0053	0.007	669046
rs8035197	15:73230750	1	BBS4	T/C	0.02888	0.014	0.0052	0.0071	691229
rs6092708	20:57517574	2	GNAS	T/C	0.1835	0.0061	0.0023	0.0071	686291
rs9610875	22:38323507	0	SOX10	T/G	0.2354	0.0055	0.002	0.0071	691709
rs11140719	9:87271229	1	NTRK2	T/C	0.95112	0.0107	0.004	0.0072	692311
rs11140810	9:87574808	0	NTRK2	T/G	0.4633	-0.0047	0.0018	0.0072	690160
rs12426026	12:76761610	0	BBS10	T/C	0.08922	0.0082	0.0031	0.0072	673394
rs8920	15:23888891	2	MAGEL2/MKRN3/NDN	A/T	0.4443	-0.0048	0.0018	0.0073	688833
rs2680691	17:56405858	14	MKS1	T/C	0.8207	-0.0061	0.0023	0.0073	686856
rs3746684	20:5283376	8	PROKR2	A/G	0.3816	-0.0047	0.0018	0.0073	692351
rs830617	3:71681950	2	PROK2	T/C	0.7999	-0.0058	0.0022	0.0074	688771
rs17418241	9:87625848	0	NTRK2	T/C	0.09606	-0.0079	0.0029	0.0074	690338
rs7159503	14:89388881	2	TTC8	A/G	0.4329	-0.0045	0.0017	0.0074	781007
rs363039	20:10220496	0	MKKS	A/G	0.3344	-0.0047	0.0018	0.0074	773014
rs6026504	20:57344893	11	GNAS	A/G	0.5188	-0.0046	0.0017	0.0074	692525
rs10885077	10:112759731	1	BBIP1	T/G	0.2553	-0.0053	0.002	0.0075	690858
rs9611437	22:41325790	7	EP300	T/C	0.05911	-0.0101	0.0038	0.0075	690461
rs9874131	3:71976489	3	PROK2	T/C	0.7195	-0.0051	0.0019	0.0076	691591
rs17005251	4:122750340	0	BBS7	T/C	0.97732	-0.0144	0.0054	0.0076	661566
rs7842334	8:96147295	10	C8orf37	T/G	0.05864	0.0101	0.0038	0.0076	691882
rs2141322	11:8067451	1	TUB	A/G	0.7785	0.0057	0.0021	0.0076	687717
rs17753687	15:72980550	0	BBS4	T/C	0.07507	-0.0086	0.0032	0.0076	688215
rs8034525	15:73148375	0	BBS4	T/C	0.7035	0.0052	0.0019	0.0076	635604
rs12902097	15:93709808	0	CHD2	A/G	0.91166	-0.0085	0.0032	0.0077	623726
rs11140708	9:87255402	5	NTRK2	C/G	0.1721	-0.0061	0.0023	0.0078	692515
rs10858660	12:88283225	36	CEP290	A/G	0.1476	0.0061	0.0023	0.0078	784378
rs17649498	15:93677144	2	CHD2	T/C	0.7653	-0.0056	0.0021	0.0078	687995
rs3790108	16:56373920	0	BBS2	A/T	0.0456	0.0117	0.0044	0.0078	662080
rs11604511	11:8055436	1	TUB	T/C	0.7389	0.005	0.0019	0.0079	790523
rs11105266	12:76650286	0	BBS10	C/G	0.3908	0.0048	0.0018	0.0079	664652
rs6015338	20:57266134	0	GNAS	A/G	0.1078	0.0077	0.0029	0.0079	692590
rs6772051	3:46143059	2	LZTFL1	A/G	0.5281	-0.0046	0.0017	0.0081	686713
rs12513643	5:42378916	7	GHR	A/C	0.8162	0.0058	0.0022	0.0081	691544
rs2411271	8:38378345	5	FGFR1	T/C	0.94013	0.0099	0.0037	0.0081	692283
rs4842134	9:139130364	1	INPP5E	A/G	0.2786	-0.0051	0.0019	0.0084	691146
rs7939737	11:8113594	0	TUB	A/G	0.04671	-0.0106	0.004	0.0084	665468
rs282237	16:56588470	0	BBS2	A/T	0.5139	-0.0047	0.0018	0.0084	654234
rs3826036	15:93467391	16	CHD2	T/C	0.4658	-0.0045	0.0017	0.0085	692566
rs6026560	20:57426528	0	GNAS	T/C	0.8007	0.0059	0.0023	0.0085	635464
rs309406	4:123618707	13	BBS12	A/G	0.5707	0.0045	0.0017	0.0086	692573
rs9310225	3:71955461	6	PROK2	T/C	0.2296	0.0051	0.0019	0.0087	795173
rs1051881	4:122737965	3	BBS7	C/G	0.01754	0.0154	0.0059	0.0087	771371
rs2133787	5:36769482	15	NIPBL	T/C	0.3939	0.0046	0.0018	0.0087	691293
rs10983398	9:119659517	0	TRIM32	A/G	0.3579	-0.0047	0.0018	0.0087	690717
rs2028884	2:63812148	0	WDPCP	A/G	0.8833	-0.0067	0.0026	0.0088	680142
rs8035159	15:93407288	0	CHD2	A/G	0.7041	-0.0047	0.0018	0.0088	774098
rs1299037	14:89464234	0	TTC8	A/G	0.6753	-0.0049	0.0019	0.009	684094
rs6026544	20:57394420	3	GNAS	T/C	0.5357	0.0045	0.0017	0.009	692549
rs12625683	20:57321421	0	GNAS	C/G	0.7166	0.0052	0.002	0.0091	679778
rs17619855	2:63970462	6	WDPCP	A/T	0.7675	-0.0053	0.002	0.0092	691916
rs1319094	3:71937853	8	PROK2	T/C	0.7602	-0.0053	0.002	0.0093	692582
rs1317500	11:8111121	0	TUB	T/C	0.07396	0.0089	0.0034	0.0093	663815
rs2275998	11:66326581	3	BBS1	T/C	0.817	0.0058	0.0022	0.0093	692327
rs3889344	9:119659873	8	TRIM32	A/G	0.08682	0.0078	0.003	0.0094	692502
rs6015411	20:57522434	5	GNAS	T/G	0.2135	0.0056	0.0021	0.0094	687109
rs17241549	6:100864280	0	SIM1	C/G	0.94545	0.0089	0.0034	0.0095	639057
rs1545480	8:96072439	0	C8orf37	A/G	0.768	-0.0053	0.002	0.0095	686569
rs12999675	2:64136069	18	WDPCP	A/C	0.238	-0.0052	0.002	0.0096	691909
rs9905728	17:17564523	0	RAI1	T/C	0.4621	-0.0045	0.0017	0.0096	683172
rs4833233	4:122688744	0	BBS7	A/G	0.4968	-0.0045	0.0017	0.0099	685881
rs869966	10:112378718	1	SMC3	T/C	0.90283	-0.0079	0.0031	0.0099	677598
rs7080438	10:112851702	1	BBIP1	A/G	0.2496	-0.0053	0.0021	0.0099	668633
rs4821506	22:36994063	0	IFT27	T/C	0.2677	0.0051	0.002	0.0099	667372
rs7747189	6:100857869	11	SIM1	A/G	0.2691	0.0049	0.0019	0.01	692590
rs1441397	8:96267756	2	C8orf37	T/C	0.0328	-0.0128	0.005	0.01	680711
rs1500887	8:96478228	16	C8orf37	T/G	0.97083	-0.0133	0.0052	0.01	687727
rs12335373	9:119604993	0	TRIM32	C/G	0.7634	-0.0053	0.0021	0.01	680853
rs12903615	15:25123085	0	NPAP1/SNURF	A/T	0.7368	0.0052	0.002	0.01	683331
rs8042437	15:93547575	0	CHD2	T/C	0.3345	0.0047	0.0018	0.01	689017
rs17136507	16:3800545	0	CREBBP	T/C	0.91359	-0.0084	0.0033	0.01	662576
rs11656215	17:17453067	9	RAI1	T/C	0.5185	0.0045	0.0018	0.01	690473
rs2206660	20:10349971	0	MKKS	A/G	0.96404	0.0115	0.0045	0.01	689829
rs10803138	1:243555219	3	SDCCAG8	A/G	0.2558	0.0051	0.002	0.011	683832
rs12991228	2:63485625	4	WDPCP	C/G	0.1718	-0.0058	0.0023	0.011	690161
rs2034802	2:63968655	0	WDPCP	A/G	0.04134	0.0108	0.0042	0.011	677130
rs7656950	4:122978246	0	BBS7	T/C	0.98193	0.0147	0.0058	0.011	655512
rs309411	4:123620150	14	BBS12	T/C	0.5893	0.0044	0.0018	0.011	691856
rs7714979	5:36770344	14	NIPBL	A/C	0.4366	0.0044	0.0017	0.011	692373
rs12523343	5:36777472	13	NIPBL	T/G	0.5636	-0.0044	0.0017	0.011	692591
rs16872890	5:42895908	7	GHR	T/C	0.02625	-0.0135	0.0053	0.011	690791
rs7803427	7:33092866	52	BBS9	T/C	0.2762	0.005	0.0019	0.011	692368
rs17786463	7:33432951	6	BBS9	A/T	0.8443	0.0061	0.0024	0.011	691748
rs2109525	7:33411267	4	BBS9	T/G	0.8402	0.006	0.0024	0.011	692222
rs10791889	11:66493825	0	BBS1	T/C	0.2646	-0.0049	0.002	0.011	691226
rs2037581	12:76799641	1	BBS10	C/G	0.2954	0.0048	0.0019	0.011	690733
rs1957239	14:89438427	0	TTC8	C/G	0.2634	0.0051	0.002	0.011	677988
rs4906933	15:25124705	1	NPAP1/SNURF	A/C	0.2766	0.005	0.002	0.011	654131
rs17115902	15:25867489	10	UBE3A	T/C	0.2857	-0.0049	0.0019	0.011	692582
rs6026459	20:57280998	1	GNAS	T/C	0.7655	-0.0053	0.0021	0.011	692439
rs6064700	20:57355786	2	GNAS	T/C	0.6735	-0.0048	0.0019	0.011	685992
rs16845	22:37326443	0	IFT27	C/G	0.04771	-0.0102	0.004	0.011	650311
rs2592787	2:170424381	2	BBS5	T/C	0.7304	-0.0049	0.0019	0.012	691478
rs2706787	4:122661749	0	BBS7	A/G	0.98123	-0.0162	0.0065	0.012	668102
rs13143866	4:123540758	3	BBS12	A/G	0.2809	0.0048	0.0019	0.012	689580
rs9475804	6:57127760	4	RAB23	A/G	0.04069	-0.0113	0.0045	0.012	692254
rs7919389	10:112606495	0	BBIP1	A/G	0.8921	0.0077	0.003	0.012	592944
rs17128382	10:112852056	0	BBIP1	A/G	0.03064	-0.0124	0.005	0.012	662467
rs7908645	10:112856425	1	BBIP1	T/G	0.6779	0.0048	0.0019	0.012	666990
rs4758317	11:8250811	3	TUB	A/C	0.5634	-0.0044	0.0018	0.012	689363
rs3741364	11:66451178	0	BBS1	T/C	0.2035	-0.0056	0.0022	0.012	637597
rs7160305	14:89239192	20	TTC8	A/G	0.487	-0.0043	0.0017	0.012	692597
rs12903587	15:93455471	3	CHD2	A/G	0.3742	-0.0043	0.0017	0.012	772114
rs2072341	16:4039141	2	CREBBP	A/G	0.05619	-0.0098	0.0039	0.012	634939
rs3790106	16:56363528	1	BBS2	C/G	0.8407	-0.0058	0.0023	0.012	772283
rs1012075	16:56583516	0	BBS2	T/G	0.7033	-0.0048	0.0019	0.012	692511
rs4646356	17:17471175	12	RAI1	A/G	0.5185	0.0043	0.0017	0.012	690751
rs9890064	17:17538008	3	RAI1	A/C	0.5419	0.0044	0.0017	0.012	682677
rs2070331	20:5373174	1	PROKR2	A/G	0.7585	0.0051	0.0021	0.012	684044
rs363006	20:10280083	0	MKKS	A/G	0.1641	0.0061	0.0024	0.012	680019
rs6703335	1:243608967	5	SDCCAG8	A/G	0.4338	-0.0043	0.0017	0.013	691916
rs12987254	2:63187114	1	WDPCP	T/C	0.8161	0.0055	0.0022	0.013	690404
rs7703713	5:42555931	16	GHR	A/G	0.2698	-0.0048	0.0019	0.013	692606
rs1876155	6:100797890	0	SIM1	T/G	0.1528	0.0057	0.0023	0.013	778351
rs7778958	7:33082518	51	BBS9	T/C	0.2992	0.0047	0.0019	0.013	692571
rs2392245	7:33567912	0	BBS9	T/C	0.3375	0.0045	0.0018	0.013	687135
rs13261505	8:96085479	0	C8orf37	C/G	0.8483	-0.0058	0.0023	0.013	788952
rs7034913	9:119577200	6	TRIM32	A/C	0.1963	0.0053	0.0021	0.013	692579
rs1326814	9:119612028	1	TRIM32	T/C	0.631	-0.0044	0.0018	0.013	685727
rs699329	15:23929120	0	MAGEL2/MKRN3/NDN	A/T	0.3267	0.005	0.002	0.013	580926
rs2554426	15:25219195	7	SNURF	T/G	0.08735	0.0076	0.0031	0.013	691737
rs2601788	16:4007086	0	CREBBP	T/C	0.7656	0.0052	0.0021	0.013	678276
rs899236	16:56352905	0	BBS2	A/G	0.2197	0.0053	0.0021	0.013	682013
rs2617841	16:56373222	0	BBS2	A/G	0.7239	-0.0049	0.002	0.013	671675
rs4784669	16:56481282	0	BBS2	A/G	0.4093	-0.0043	0.0018	0.013	690845
rs9929724	16:56535613	27	BBS2	A/C	0.3923	-0.0044	0.0018	0.013	692288
rs2145089	20:5283634	17	PROKR2	A/G	0.4965	0.0043	0.0017	0.013	692283
rs6737648	2:73531300	5	ALMS1	A/G	0.8305	-0.0055	0.0023	0.014	690820
rs2015477	2:73847024	6	ALMS1	A/G	0.93873	-0.0087	0.0035	0.014	728104
rs2685277	2:74010265	0	ALMS1	C/G	0.8377	-0.0061	0.0025	0.014	655602
rs17262464	3:45723434	0	LZTFL1	T/C	0.859	0.0064	0.0026	0.014	658493
rs7644870	3:45830886	2	LZTFL1	A/C	0.7423	0.0048	0.0019	0.014	691651
rs12637023	3:46121192	18	LZTFL1	A/C	0.411	0.0043	0.0017	0.014	692581
rs301962	3:97393404	0	ARL6	T/G	0.1004	0.0071	0.0029	0.014	687571
rs921301	4:123705387	13	BBS12	T/C	0.03151	0.0132	0.0054	0.014	676756
rs1557852	5:132181800	6	AFF4	A/G	0.3179	-0.0045	0.0018	0.014	692414
rs4236146	6:56960612	0	RAB23	T/G	0.2494	-0.0054	0.0022	0.014	665415
rs9449851	6:84935866	0	MRAP2	A/G	0.7934	0.0053	0.0022	0.014	682863
rs9376800	6:100668943	4	SIM1	C/G	0.8955	0.007	0.0028	0.014	692108
rs16881929	7:33042945	4	BBS9	T/C	0.7803	-0.005	0.0021	0.014	750973
rs6988929	8:38418517	0	FGFR1	A/G	0.05899	-0.0102	0.0042	0.014	640726
rs7824060	8:96439026	0	C8orf37	A/G	0.2746	0.0048	0.002	0.014	680604
rs9693641	8:100566950	2	VPS13B	T/C	0.05227	-0.0095	0.0039	0.014	675562
rs6468703	8:100993550	0	VPS13B	T/C	0.8651	-0.0063	0.0026	0.014	683561
rs624561	11:66414915	2	BBS1	T/C	0.7453	0.0049	0.002	0.014	692549
rs2446982	12:49271097	5	KMT2D	A/G	0.1195	0.0065	0.0027	0.014	692580
rs824185	15:24028745	7	MAGEL2/MKRN3/NDN	A/G	0.2311	-0.005	0.002	0.014	688043
rs10852181	15:93412778	0	CHD2	C/G	0.1444	0.0062	0.0025	0.014	682973
rs7170644	15:93559178	0	CHD2	A/G	0.3118	0.0047	0.0019	0.014	687187
rs6107614	20:5308321	1	PROKR2	A/G	0.5803	0.0041	0.0017	0.014	777032
rs6064709	20:57379850	2	GNAS	A/G	0.4977	0.0043	0.0017	0.014	681832
rs2746971	22:37101890	4	IFT27	T/C	0.5938	0.0043	0.0018	0.014	692580
rs2267362	22:37216482	1	IFT27	C/G	0.7488	0.0048	0.0019	0.014	765892
rs139853	22:38290052	0	SOX10	A/G	0.06455	0.0086	0.0035	0.014	681182
rs132930	22:38487029	1	SOX10	A/G	0.5765	-0.0043	0.0018	0.014	692617
rs7579192	2:64173312	0	WDPCP	A/G	0.94077	-0.0084	0.0034	0.015	781177
rs12152710	4:122895284	0	BBS7	T/C	0.96755	0.0118	0.0048	0.015	657462
rs396542	5:36828730	1	NIPBL	A/G	0.7248	0.0048	0.0019	0.015	692548
rs11746790	5:42886820	0	GHR	T/G	0.4905	0.0043	0.0018	0.015	685035
rs215970	6:84714136	0	MRAP2	A/C	0.9772	-0.0154	0.0063	0.015	611461
rs3750078	7:32969489	0	BBS9	A/G	0.6007	0.0043	0.0018	0.015	690984
rs4723226	7:33003687	1	BBS9	A/T	0.2319	-0.0049	0.002	0.015	692493
rs12675339	8:118029346	4	RAD21	A/G	0.3519	-0.0044	0.0018	0.015	691806
rs7048015	9:87478135	0	NTRK2	A/C	0.8091	-0.0053	0.0022	0.015	688178
rs12348710	9:87554605	6	NTRK2	T/C	0.8649	0.0061	0.0025	0.015	691130
rs1490402	9:87673253	14	NTRK2	T/C	0.8436	0.0059	0.0024	0.015	691948
rs3013300	9:139431057	1	INPP5E	T/C	0.3624	-0.0048	0.002	0.015	569284
rs12906774	15:25123699	0	NPAP1/SNURF	C/G	0.3158	-0.0046	0.0019	0.015	668726
rs12916137	15:93709154	0	CHD2	A/C	0.03093	0.0107	0.0044	0.015	599141
rs17706224	15:93718354	1	CHD2	T/C	0.8398	-0.0061	0.0025	0.015	642362
rs6516027	20:5359457	2	PROKR2	A/G	0.5486	-0.0043	0.0018	0.015	691914
rs6104567	20:10195433	0	MKKS	T/G	0.7419	0.0048	0.002	0.015	678641
rs2421547	2:73641088	4	ALMS1	T/G	0.06297	0.0081	0.0034	0.016	792479
rs830637	3:71670465	0	PROK2	T/C	0.5103	0.0042	0.0017	0.016	684368
rs4240266	4:122973594	2	BBS7	A/T	0.95668	0.01	0.0042	0.016	690007
rs2301068	5:36678540	3	NIPBL	T/C	0.4673	0.0042	0.0017	0.016	690958
rs10504948	8:96476183	1	C8orf37	T/G	0.98509	0.0174	0.0072	0.016	676914
rs11140803	9:87512669	0	NTRK2	A/G	0.1748	0.0059	0.0025	0.016	675407
rs6559849	9:87766276	3	NTRK2	A/G	0.5885	-0.0042	0.0018	0.016	682796
rs10125212	9:87738600	0	NTRK2	A/T	0.5327	-0.0042	0.0017	0.016	679494
rs6559225	9:140687468	31	EHMT1	A/G	0.6919	-0.0045	0.0019	0.016	692329
rs7113986	11:7914252	0	TUB	T/G	0.8638	-0.0064	0.0027	0.016	635468
rs506028	11:66468469	0	BBS1	A/G	0.90967	0.0073	0.003	0.016	691379
rs11168828	12:49422795	0	KMT2D	A/G	0.08378	-0.0087	0.0036	0.016	594668
rs2930644	15:25869694	24	UBE3A	T/C	0.97632	-0.0141	0.0059	0.016	685099
rs12906942	15:72794405	1	BBS4	T/C	0.9824	0.0158	0.0065	0.016	668181
rs2304655	15:93435225	1	CHD2	T/C	0.5645	-0.0042	0.0018	0.016	679823
rs6546008	2:63733387	1	WDPCP	A/G	0.0397	0.0103	0.0044	0.017	670372
rs2247771	3:45719209	6	LZTFL1	T/C	0.6489	0.0043	0.0018	0.017	692412
rs1803183	4:122735142	6	BBS7	A/G	0.98293	-0.0143	0.006	0.017	766505
rs1997179	4:122984633	0	BBS7	T/C	0.8484	-0.0057	0.0024	0.017	682949
rs9449854	6:84949507	13	MRAP2	A/C	0.3138	-0.0045	0.0019	0.017	691172
rs1187287	9:87414794	4	NTRK2	A/G	0.2012	-0.0051	0.0021	0.017	692435
rs13297376	9:87784860	14	NTRK2	C/G	0.4193	-0.0039	0.0017	0.017	788092
rs11145922	9:139254317	0	INPP5E	A/G	0.1522	0.006	0.0025	0.017	676081
rs16933247	11:7892797	2	TUB	C/G	0.01327	-0.0168	0.007	0.017	747284
rs7948163	11:7990683	0	TUB	T/G	0.8815	0.0065	0.0027	0.017	686711
rs10858670	12:88347157	0	CEP290	T/C	0.6608	-0.0047	0.0019	0.017	620191
rs12900219	15:24032467	6	MAGEL2/MKRN3/NDN	T/C	0.2318	-0.0048	0.002	0.017	692401
rs4318375	2:64044827	0	WDPCP	T/C	0.5256	0.0041	0.0017	0.018	687472
rs6786206	3:71882642	0	PROK2	T/C	0.1458	0.006	0.0025	0.018	676272
rs17005934	4:123549699	4	BBS12	T/C	0.942	0.0089	0.0037	0.018	692399
rs6869867	5:36739499	0	NIPBL	A/G	0.3045	0.0044	0.0019	0.018	678597
rs12201659	6:100633338	0	SIM1	A/G	0.4177	0.0044	0.0018	0.018	653988
rs17306522	6:101109175	0	SIM1	T/G	0.142	0.0059	0.0025	0.018	687429
rs4723274	7:33235084	0	BBS9	T/C	0.3446	0.0043	0.0018	0.018	689085
rs17582026	8:38429372	0	FGFR1	A/C	0.08694	-0.0075	0.0032	0.018	685638
rs3780634	9:87488718	9	NTRK2	A/G	0.8397	-0.0055	0.0023	0.018	692169
rs9548	9:139317823	2	INPP5E	T/C	0.176	0.0053	0.0022	0.018	692071
rs1045777	9:140512555	10	EHMT1	A/G	0.1939	0.0053	0.0022	0.018	687285
rs11195165	10:112281955	0	SMC3	A/T	0.95884	0.0107	0.0045	0.018	650163
rs11819139	10:112331272	3	SMC3	A/G	0.04636	-0.0093	0.0039	0.018	725819
rs17700521	14:89315875	2	TTC8	C/G	0.7298	0.0046	0.002	0.018	690714
rs4906974	15:25818586	0	UBE3A	T/C	0.7201	-0.0049	0.002	0.018	545609
rs8023358	15:73052845	6	BBS4	A/G	0.8454	0.0058	0.0024	0.018	692336
rs285736	15:93229184	3	CHD2	A/T	0.7892	0.005	0.0021	0.018	680456
rs2241955	16:56379229	1	BBS2	T/C	0.05274	0.0094	0.0039	0.018	769633
rs9302683	16:56610375	0	BBS2	A/T	0.6011	-0.0042	0.0018	0.018	684600
rs2460867	2:170409326	6	BBS5	T/C	0.6078	-0.0041	0.0018	0.019	692094
rs2531747	3:45828586	1	LZTFL1	T/C	0.4539	0.0039	0.0017	0.019	780612
rs13100488	3:71683981	0	PROK2	T/C	0.4737	0.0042	0.0018	0.019	672461
rs17574650	5:42436916	0	GHR	A/C	0.8946	-0.0068	0.0029	0.019	673767
rs1886254	6:84851397	0	MRAP2	T/G	0.132	-0.0062	0.0026	0.019	680859
rs1408274	6:84972805	0	MRAP2	T/G	0.125	-0.0059	0.0025	0.019	790575
rs6469661	8:117841045	2	RAD21	T/C	0.4711	-0.0041	0.0017	0.019	680397
rs6559222	9:140684139	32	EHMT1	T/C	0.6919	-0.0044	0.0019	0.019	692292
rs7082572	10:112699394	12	BBIP1	A/G	0.2354	-0.0047	0.002	0.019	691811
rs9703807	10:112741551	0	BBIP1	T/C	0.7878	0.0049	0.0021	0.019	690604
rs7915903	10:112877134	1	BBIP1	C/G	0.7395	0.0047	0.002	0.019	682504
rs17525249	15:93472980	4	CHD2	T/C	0.91546	0.0074	0.0031	0.019	690910
rs4786426	16:3709326	0	CREBBP	T/C	0.03783	-0.0111	0.0047	0.019	637500
rs17256322	16:4127619	0	CREBBP	A/T	0.3674	0.0042	0.0018	0.019	688867
rs2071005	16:56598904	1	BBS2	A/G	0.5372	-0.0041	0.0017	0.019	687608
rs4482278	16:56726874	1	BBS2	A/T	0.6131	0.0041	0.0018	0.019	692089
rs16991547	20:10394046	32	MKKS	A/G	0.1118	-0.0064	0.0027	0.019	692380
rs6040028	20:10549503	0	MKKS	A/G	0.2306	0.0048	0.0021	0.019	692595
rs2421860	2:63375950	0	WDPCP	T/C	0.7575	-0.0047	0.002	0.02	686265
rs13136587	4:123593973	0	BBS12	C/G	0.7185	-0.0047	0.002	0.02	669460
rs6451604	5:42254097	28	GHR	T/C	0.7371	0.0045	0.0019	0.02	692441
rs7802256	7:33111950	0	BBS9	T/C	0.1321	0.0059	0.0026	0.02	691064
rs1187333	9:87266352	12	NTRK2	A/G	0.1416	-0.0057	0.0025	0.02	692392
rs3860945	9:87585624	2	NTRK2	A/G	0.8435	0.0056	0.0024	0.02	692207
rs3794015	11:8264560	0	TUB	T/C	0.3867	0.0043	0.0018	0.02	668598
rs11645655	16:4060335	5	CREBBP	A/G	0.1131	0.0061	0.0026	0.02	791271
rs11698216	20:5374141	0	PROKR2	T/C	0.98708	0.0175	0.0075	0.02	619766
rs363004	20:10279797	13	MKKS	A/G	0.0618	0.0079	0.0034	0.02	780662
rs6108565	20:10398974	31	MKKS	T/C	0.1093	-0.0064	0.0027	0.02	692606
rs10803142	1:243598234	4	SDCCAG8	A/G	0.5288	0.004	0.0017	0.021	687079
rs7702884	5:132147659	7	AFF4	T/C	0.2979	-0.0044	0.0019	0.021	691339
rs10038027	5:132230745	1	AFF4	A/T	0.6366	0.0039	0.0017	0.021	787780
rs7816	9:87430521	7	NTRK2	A/T	0.7525	0.0047	0.002	0.021	689313
rs4876902	9:140710603	0	EHMT1	T/C	0.2216	0.0048	0.0021	0.021	685822
rs7895872	10:112678657	14	BBIP1	T/G	0.7442	0.0046	0.002	0.021	690456
rs10839957	11:8003309	0	TUB	A/G	0.2902	-0.0045	0.0019	0.021	673539
rs964034	15:93563661	0	CHD2	C/G	0.8756	0.0063	0.0027	0.021	660997
rs9607793	22:41736090	0	EP300	A/G	0.01865	0.016	0.0069	0.021	658686
rs2421917	2:63449512	8	WDPCP	T/C	0.90844	0.007	0.003	0.022	692570
rs13006124	2:63961179	8	WDPCP	A/C	0.5741	0.004	0.0017	0.022	690517
rs6770261	3:45804734	0	LZTFL1	T/C	0.2544	0.0042	0.0019	0.022	778299
rs158411	5:36856801	2	NIPBL	T/C	0.7208	0.0045	0.0019	0.022	690587
rs7798118	7:33311464	34	BBS9	A/G	0.91335	0.007	0.0031	0.022	692577
rs4442031	7:33355239	1	BBS9	A/G	0.93259	-0.0076	0.0033	0.022	787303
rs10249379	7:33492280	0	BBS9	T/G	0.98433	0.0154	0.0067	0.022	650235
rs7824338	8:117850062	2	RAD21	A/G	0.532	-0.004	0.0017	0.022	692083
rs526454	9:87772807	3	NTRK2	A/G	0.93124	-0.0078	0.0034	0.022	692553
rs329209	9:87808147	3	NTRK2	T/C	0.08238	0.0072	0.0032	0.022	689940
rs2242663	11:66335308	0	BBS1	T/C	0.7622	0.0046	0.002	0.022	692229
rs850818	15:23893311	0	MAGEL2/MKRN3/NDN	A/G	0.4835	-0.0042	0.0018	0.022	623351
rs2017626	15:25432842	12	SNURF/UBE3A	A/C	0.04093	0.0106	0.0046	0.022	690982
rs12907473	15:93454250	5	CHD2	A/G	0.4156	-0.0041	0.0018	0.022	671400
rs130023	16:3833306	0	CREBBP	A/G	0.9727	-0.0108	0.0047	0.022	620779
rs4783937	16:56377045	1	BBS2	A/G	0.3769	-0.0041	0.0018	0.022	684650
rs12480262	20:57559630	1	GNAS	A/G	0.8851	-0.0063	0.0027	0.022	679477
rs1883988	22:37105180	8	IFT27	A/G	0.2689	-0.0045	0.002	0.022	691437
rs3927	22:41722864	22	EP300	T/C	0.7589	-0.0046	0.002	0.022	692621
rs7792135	7:33082375	1	BBS9	A/G	0.8036	0.0049	0.0022	0.023	688379
rs1550856	8:117805397	0	RAD21	A/G	0.09331	-0.0067	0.0029	0.023	647203
rs1187286	9:87415028	2	NTRK2	T/G	0.7613	0.0046	0.002	0.023	691803
rs10732688	9:140581700	0	EHMT1	T/G	0.6933	0.0043	0.0019	0.023	685547
rs4758040	11:8101173	0	TUB	T/C	0.5384	-0.0039	0.0017	0.023	692532
rs1040213	12:76542595	0	BBS10	T/C	0.91499	-0.0066	0.0029	0.023	782214
rs4761362	12:76588326	1	BBS10	A/C	0.585	0.0041	0.0018	0.023	671025
rs11104789	12:88678801	1	CEP290	C/G	0.9862	-0.0165	0.0072	0.023	658451
rs1989268	15:25836237	0	UBE3A	T/C	0.757	-0.0045	0.002	0.023	692090
rs8037021	15:93401742	0	CHD2	C/G	0.8989	-0.0067	0.0029	0.023	679252
rs3730129	16:4033522	0	CREBBP	T/C	0.04771	-0.0105	0.0046	0.023	603988
rs114502	16:56583055	1	BBS2	T/C	0.3423	0.0042	0.0019	0.023	689913
rs8178289	17:56319930	0	MKS1	A/C	0.8482	-0.0052	0.0023	0.023	778657
rs362585	20:10256252	13	MKKS	T/G	0.0525	0.009	0.004	0.023	691049
rs2235682	22:36983428	5	IFT27	A/G	0.2778	-0.0044	0.0019	0.023	692601
rs7709455	5:36713033	7	NIPBL	T/C	0.2404	-0.0044	0.0019	0.024	787826
rs7818839	8:38488601	0	FGFR1	A/G	0.3252	0.0042	0.0019	0.024	662594
rs2044899	8:96084835	0	C8orf37	A/C	0.3778	0.004	0.0018	0.024	682709
rs2149561	9:140469600	0	EHMT1	T/C	0.04467	0.0103	0.0046	0.024	576605
rs4821981	22:41415644	8	EP300	T/G	0.402	0.0038	0.0017	0.024	791582
rs4671454	2:63156832	4	WDPCP	T/G	0.872	0.0058	0.0026	0.025	691863
rs3769771	2:170368438	2	BBS5	T/C	0.1297	-0.0054	0.0024	0.025	795528
rs13073861	3:46150156	10	LZTFL1	A/C	0.4111	0.0037	0.0017	0.025	785156
rs2476900	6:84849717	0	MRAP2	A/G	0.1998	-0.0047	0.0021	0.025	783335
rs1362368	7:33197232	1	BBS9	A/C	0.4223	0.0039	0.0017	0.025	692495
rs4876948	9:140694331	0	EHMT1	T/C	0.1244	0.006	0.0027	0.025	683537
rs1524842	15:23954249	1	MAGEL2/MKRN3/NDN	A/G	0.4656	-0.0039	0.0018	0.025	663006
rs872282	15:25876991	6	UBE3A	A/C	0.4357	-0.004	0.0018	0.025	689470
rs987385	15:73159873	0	BBS4	A/G	0.6594	0.0039	0.0017	0.025	781408
rs9940638	16:56578562	0	BBS2	A/G	0.1555	0.0055	0.0025	0.025	668339
rs2585840	17:56140774	0	MKS1	A/G	0.8859	-0.0063	0.0028	0.025	678444
rs2526360	17:56386358	6	MKS1	A/T	0.3074	0.0042	0.0019	0.025	692382
rs6139702	20:5343385	0	PROKR2	T/C	0.833	-0.0053	0.0024	0.025	684124
rs2143619	20:10614435	0	MKKS	A/G	0.4053	-0.0039	0.0018	0.025	686491
rs2180796	20:57347818	6	GNAS	T/C	0.4281	0.0039	0.0017	0.025	689702
rs13054174	22:38467943	0	SOX10	C/G	0.98562	-0.0149	0.0067	0.025	663301
rs2384629	2:27606098	0	IFT172	A/G	0.0352	-0.0112	0.005	0.026	661409
rs17657646	2:63266622	0	WDPCP	T/C	0.92967	-0.0085	0.0038	0.026	675275
rs1058961	3:45865006	0	LZTFL1	T/C	0.35	-0.004	0.0018	0.026	689942
rs830644	3:71665559	10	PROK2	T/C	0.4211	0.0039	0.0017	0.026	687344
rs1374912	3:71811875	1	PROK2	A/G	0.6835	0.0042	0.0019	0.026	684913
rs6451305	5:36719979	2	NIPBL	T/C	0.7621	0.0046	0.002	0.026	687626
rs13160324	5:36780924	4	NIPBL	A/G	0.6282	0.004	0.0018	0.026	688640
rs11959168	5:42243481	0	GHR	A/G	0.4702	0.0039	0.0017	0.026	683384
rs11739417	5:132228133	13	AFF4	A/G	0.7982	0.0048	0.0021	0.026	692509
rs17683594	6:57167120	0	RAB23	T/C	0.04841	-0.0088	0.004	0.026	665649
rs7357309	7:33030058	0	BBS9	A/G	0.1784	-0.0052	0.0024	0.026	674743
rs961679	7:33458535	36	BBS9	A/G	0.7915	-0.0047	0.0021	0.026	692325
rs17774608	14:89372968	4	TTC8	A/G	0.4474	0.0039	0.0017	0.026	691062
rs7181322	15:24032071	0	MAGEL2/MKRN3/NDN	T/C	0.1843	0.005	0.0022	0.026	685192
rs12148733	15:72835015	0	BBS4	A/G	0.8293	0.0052	0.0023	0.026	688208
rs7497577	15:72902770	0	BBS4	A/G	0.1414	-0.0058	0.0026	0.026	685856
rs4813740	20:5299893	3	PROKR2	A/G	0.3319	0.0042	0.0019	0.026	680957
rs6085132	20:5344064	10	PROKR2	T/C	0.95785	-0.0094	0.0042	0.026	690073
rs2269512	22:37210677	1	IFT27	T/C	0.2354	-0.0046	0.0021	0.026	673221
rs1476214	4:123813009	3	BBS12	A/G	0.379	-0.0039	0.0018	0.027	691515
rs2445027	8:38407322	0	FGFR1	T/G	0.8555	0.0056	0.0026	0.027	690582
rs7831963	8:100865242	16	VPS13B	A/G	0.8257	-0.005	0.0023	0.027	692598
rs2126076	8:101033737	26	VPS13B	A/G	0.5645	-0.0038	0.0017	0.027	692597
rs4930368	11:66179358	19	BBS1	T/C	0.3178	-0.0042	0.0019	0.027	682954
rs1563099	15:24979540	0	NPAP1	A/G	0.97316	-0.0111	0.0051	0.027	743263
rs8026695	15:93467354	3	CHD2	T/G	0.5425	-0.0038	0.0017	0.027	691606
rs6039854	20:10308070	0	MKKS	A/C	0.5196	-0.0039	0.0018	0.027	679342
rs830621	3:71678103	9	PROK2	T/C	0.5828	-0.0038	0.0017	0.028	692564
rs1884263	6:100633140	4	SIM1	A/G	0.1037	-0.0063	0.0029	0.028	684092
rs2392229	7:33173539	28	BBS9	A/G	0.91365	0.0067	0.0031	0.028	692107
rs10505292	8:118033327	0	RAD21	A/G	0.7702	0.0046	0.0021	0.028	684836
rs2277192	9:87573977	0	NTRK2	A/G	0.8541	0.0055	0.0025	0.028	667958
rs7030902	9:87835091	0	NTRK2	A/G	0.4609	0.0038	0.0017	0.028	692520
rs2423487	20:10213095	7	MKKS	T/C	0.90248	-0.0064	0.0029	0.028	692212
rs7273333	20:57362800	4	GNAS	A/C	0.3296	0.0042	0.0019	0.028	685900
rs12692897	2:170231236	0	BBS5	A/G	0.7384	-0.0043	0.002	0.029	687966
rs1994490	3:46007702	2	LZTFL1	T/C	0.4592	-0.0037	0.0017	0.029	692479
rs12153009	5:42553879	0	GHR	A/G	0.2993	0.0041	0.0019	0.029	692566
rs7832488	8:100865413	17	VPS13B	A/G	0.174	0.005	0.0023	0.029	692372
rs17179228	15:25120558	2	NPAP1/SNURF	C/G	0.1002	0.0061	0.0028	0.029	744250
rs362570	20:10246864	0	MKKS	T/C	0.1746	0.005	0.0023	0.029	688474
rs1316853	3:71837036	0	PROK2	T/C	0.03157	-0.0109	0.005	0.03	654114
rs6883523	5:42564748	0	GHR	T/G	0.1923	-0.0048	0.0022	0.03	689696
rs9376867	6:100760042	0	SIM1	A/G	0.3003	0.0041	0.0019	0.03	683951
rs4521728	8:96329180	1	C8orf37	A/C	0.8329	-0.005	0.0023	0.03	679408
rs1347856	9:87173092	3	NTRK2	T/G	0.286	0.0041	0.0019	0.03	692372
rs7858355	9:140680789	32	EHMT1	T/C	0.283	0.0042	0.0019	0.03	691259
rs2930613	15:25865190	1	UBE3A	A/G	0.96416	-0.0106	0.0049	0.03	674660
rs12600108	16:56308431	0	BBS2	A/C	0.4761	0.0038	0.0017	0.03	686492
rs11869600	17:17504856	3	RAI1	A/G	0.3838	0.0038	0.0018	0.03	691599
rs2680699	17:56445344	1	MKS1	T/C	0.7761	-0.0045	0.0021	0.03	685660
rs2531752	3:45775506	0	LZTFL1	A/T	0.118	-0.0056	0.0026	0.031	772135
rs4552321	3:71982509	5	PROK2	T/C	0.1639	-0.0049	0.0023	0.031	692587
rs882569	4:122567973	1	BBS7	C/G	0.8572	0.0053	0.0025	0.031	688291
rs11959466	5:42803824	0	GHR	T/C	0.05765	0.0089	0.0041	0.031	645212
rs9294293	6:84877627	20	MRAP2	A/C	0.01725	-0.0135	0.0063	0.031	677508
rs9449850	6:84935694	0	MRAP2	T/C	0.8323	0.0053	0.0024	0.031	674907
rs6474354	8:38302965	1	FGFR1	T/C	0.2053	-0.0047	0.0022	0.031	680850
rs803939	9:119453455	24	TRIM32	T/C	0.5292	-0.0035	0.0016	0.031	794124
rs2896092	14:89379801	5	TTC8	A/G	0.1712	0.0049	0.0023	0.031	691604
rs7495396	15:23785447	0	MAGEL2/MKRN3/NDN	A/G	0.07039	0.0072	0.0033	0.031	520704
rs6026498	20:57339213	4	GNAS	T/C	0.7249	-0.0042	0.002	0.031	688993
rs140040	22:36969932	0	IFT27	A/G	0.4477	-0.0039	0.0018	0.031	679692
rs13171720	5:42442715	9	GHR	T/C	0.2024	-0.0045	0.0021	0.032	692246
rs2599711	8:96072196	0	C8orf37	A/T	0.8012	-0.0047	0.0022	0.032	679525
rs10089123	8:96097613	1	C8orf37	A/G	0.07799	0.0071	0.0033	0.032	690073
rs7009891	8:118029019	4	RAD21	T/C	0.5548	-0.0037	0.0017	0.032	690789
rs6585021	10:112650055	1	BBIP1	T/C	0.1035	-0.0059	0.0027	0.032	794843
rs12443284	15:25841605	0	UBE3A	A/G	0.8549	0.0054	0.0025	0.032	683049
rs6107606	20:5247910	0	PROKR2	A/C	0.7973	0.0046	0.0021	0.032	684367
rs163781	20:57563765	2	GNAS	A/G	0.5343	0.0037	0.0017	0.032	690398
rs555269	6:84726156	12	MRAP2	T/C	0.2582	-0.0042	0.002	0.033	691736
rs3109433	7:33011535	0	BBS9	T/C	0.2234	-0.0047	0.0022	0.033	665770
rs17170217	7:33441870	38	BBS9	T/C	0.91394	0.0066	0.0031	0.033	691773
rs11784608	8:96202284	3	C8orf37	A/G	0.90189	-0.0059	0.0028	0.033	691416
rs1505521	8:118076115	3	RAD21	A/G	0.04338	-0.0081	0.0038	0.033	792816
rs4837855	9:119541710	0	TRIM32	A/T	0.03637	-0.0121	0.0056	0.033	591350
rs1343450	10:112860514	0	BBIP1	T/G	0.1542	-0.0053	0.0025	0.033	677792
rs4758316	11:8238308	1	TUB	A/G	0.03333	0.0113	0.0053	0.033	601004
rs2368514	12:76692757	3	BBS10	A/G	0.6135	0.0038	0.0018	0.033	681188
rs2930581	15:25844151	1	UBE3A	T/G	0.585	-0.0038	0.0018	0.033	679415
rs6502615	17:17612023	3	RAI1	T/C	0.4282	0.0035	0.0016	0.033	793773
rs5995349	22:37234694	1	IFT27	T/C	0.06045	-0.0078	0.0037	0.033	680057
rs2592811	2:170458375	38	BBS5	T/C	0.4329	-0.0036	0.0017	0.034	692597
rs6815973	4:122663430	0	BBS7	A/T	0.2809	0.0041	0.0019	0.034	692428
rs10491279	5:132198100	4	AFF4	T/C	0.1731	-0.0048	0.0023	0.034	692088
rs17166294	5:132201897	5	AFF4	T/C	0.8339	0.0049	0.0023	0.034	690194
rs9297953	8:96201904	4	C8orf37	A/G	0.8915	-0.0058	0.0028	0.034	690980
rs10706	9:139301414	3	INPP5E	C/G	0.179	0.0047	0.0022	0.034	690980
rs821304	9:140418677	0	EHMT1	T/G	0.7201	-0.0044	0.0021	0.034	557714
rs1343451	10:112860391	3	BBIP1	A/G	0.7001	0.0041	0.0019	0.034	679779
rs4758293	11:8129433	0	TUB	C/G	0.04695	-0.009	0.0043	0.034	582629
rs11161162	15:23728368	5	MAGEL2/MKRN3	A/G	0.5548	-0.0037	0.0017	0.034	690019
rs824167	15:24063516	0	MAGEL2/MKRN3/NDN	A/G	0.4917	-0.0037	0.0018	0.034	683589
rs11076783	16:3782705	0	CREBBP	T/C	0.06192	0.0078	0.0037	0.034	664593
rs2432540	16:56419628	25	BBS2	A/G	0.5422	0.0036	0.0017	0.034	692578
rs2191028	3:45803585	0	LZTFL1	T/C	0.3682	-0.0038	0.0018	0.035	684287
rs4683143	3:45855172	1	LZTFL1	T/C	0.3718	-0.0036	0.0017	0.035	774253
rs16888435	6:57127622	1	RAB23	T/C	0.9437	0.0081	0.0039	0.035	692109
rs735641	6:84951849	0	MRAP2	A/G	0.2027	-0.0046	0.0022	0.035	689359
rs11774997	8:99875651	0	VPS13B	C/G	0.02543	-0.0112	0.0053	0.035	628743
rs11785240	8:100621749	1	VPS13B	A/C	0.97661	0.0113	0.0054	0.035	660888
rs12378021	9:87635540	1	NTRK2	T/C	0.1751	-0.0046	0.0022	0.035	793215
rs12345565	9:139133033	1	INPP5E	A/G	0.94346	0.0081	0.0038	0.035	641964
rs1491866	11:27800047	9	BDNF	T/C	0.3485	0.0038	0.0018	0.035	689913
rs10777084	12:88380094	17	CEP290	T/C	0.8905	-0.0058	0.0027	0.035	691885
rs10146530	14:89461522	0	TTC8	T/C	0.2701	-0.0042	0.002	0.035	669139
rs12444489	16:56630934	0	BBS2	T/C	0.2066	0.0042	0.002	0.035	794382
rs7767082	6:57160897	0	RAB23	A/G	0.381	-0.0037	0.0018	0.036	679208
rs7113729	11:8089121	4	TUB	T/C	0.5637	-0.0037	0.0017	0.036	687262
rs17309944	11:27764496	0	BDNF	T/C	0.08179	0.0064	0.003	0.036	654822
rs4480754	15:23886941	0	MAGEL2/MKRN3/NDN	T/G	0.7323	-0.004	0.0019	0.036	753581
rs2532018	16:4126531	3	CREBBP	A/G	0.6314	0.0037	0.0018	0.036	690161
rs17778243	20:5353005	0	PROKR2	T/C	0.02344	-0.0094	0.0045	0.036	641182
rs5756391	22:37298344	5	IFT27	A/G	0.3806	0.0035	0.0017	0.036	785508
rs1526915	4:122959312	22	BBS7	T/C	0.8379	0.0049	0.0023	0.037	692365
rs11766521	7:33196637	69	BBS9	T/C	0.8185	-0.0046	0.0022	0.037	692478
rs1029852	7:33409323	40	BBS9	T/C	0.91528	0.0065	0.0031	0.037	691963
rs7835320	8:38471372	3	FGFR1	T/C	0.3302	0.0038	0.0018	0.037	691886
rs7461765	8:96461950	0	C8orf37	T/C	0.09659	0.0061	0.0029	0.037	688190
rs2104599	10:112801760	8	BBIP1	T/C	0.1901	-0.0046	0.0022	0.037	692049
rs4758281	11:8091548	4	TUB	A/C	0.3805	0.0037	0.0018	0.037	687237
rs4442780	15:73219253	0	BBS4	T/C	0.93154	0.007	0.0033	0.037	788600
rs1869771	17:17561094	2	RAI1	A/C	0.46	0.0036	0.0017	0.037	689057
rs4815804	20:5350308	0	PROKR2	A/G	0.6168	0.0038	0.0018	0.037	683761
rs9611528	22:41648502	11	EP300	T/C	0.6742	-0.0038	0.0018	0.037	691417
rs2997488	1:243613000	0	SDCCAG8	A/G	0.05987	0.0085	0.0041	0.038	667812
rs704299	3:71733420	8	PROK2	T/C	0.1588	-0.0049	0.0024	0.038	692573
rs12650119	4:122962812	0	BBS7	T/C	0.8978	0.0058	0.0028	0.038	679404
rs736917	5:36728340	0	NIPBL	T/G	0.1918	-0.0048	0.0023	0.038	663259
rs7768342	6:100801811	1	SIM1	C/G	0.4616	-0.0036	0.0017	0.038	692142
rs3734355	6:100868721	14	SIM1	A/G	0.1348	0.0052	0.0025	0.038	692434
rs13238052	7:33133384	0	BBS9	A/G	0.1075	-0.0057	0.0027	0.038	676071
rs17169913	7:33195816	70	BBS9	T/C	0.8191	-0.0045	0.0022	0.038	692457
rs3741367	11:66083129	0	BBS1	T/C	0.5494	0.0036	0.0017	0.038	692496
rs11106482	12:76679256	12	BBS10	A/C	0.8252	0.0049	0.0023	0.038	690766
rs6139696	20:5325798	5	PROKR2	A/C	0.8259	-0.0048	0.0023	0.038	691916
rs2114755	20:57544520	0	GNAS	A/G	0.3773	0.0038	0.0018	0.038	685403
rs9610583	22:37193986	0	IFT27	A/C	0.6677	0.0041	0.002	0.038	657347
rs5750310	22:37208660	0	IFT27	A/C	0.5205	-0.0037	0.0018	0.038	681491
rs2191032	3:45906572	5	LZTFL1	T/C	0.7855	0.0043	0.0021	0.039	692492
rs1753990	6:84729122	14	MRAP2	T/G	0.2587	-0.0041	0.002	0.039	690989
rs2306899	8:38095662	49	FGFR1	T/C	0.2341	-0.0039	0.0019	0.039	795600
rs7817630	8:99848148	0	VPS13B	T/G	0.05168	-0.0081	0.0039	0.039	690072
rs4734443	8:101012421	5	VPS13B	T/C	0.4015	-0.0036	0.0018	0.039	688999
rs6997684	8:117914100	5	RAD21	A/C	0.4271	-0.0035	0.0017	0.039	773124
rs11793903	9:87263753	1	NTRK2	A/G	0.05893	-0.0079	0.0038	0.039	675635
rs4837682	9:119382930	2	TRIM32	T/C	0.8297	0.0047	0.0023	0.039	691582
rs2242501	11:8118103	1	TUB	A/G	0.2621	0.0041	0.002	0.039	691557
rs7481121	11:8120902	0	TUB	A/G	0.08577	-0.0068	0.0033	0.039	676999
rs10047997	15:25106750	0	NPAP1/SNURF	A/G	0.8733	0.0052	0.0025	0.039	688662
rs886528	16:3811556	0	CREBBP	A/G	0.5505	0.0034	0.0017	0.039	794326
rs6015369	20:57361880	5	GNAS	T/G	0.7171	-0.004	0.0019	0.039	686392
rs975404	4:123521292	0	BBS12	T/C	0.6432	-0.0037	0.0018	0.04	686368
rs10231297	7:33385529	1	BBS9	A/G	0.03198	-0.0106	0.0052	0.04	646849
rs7002762	8:96200507	0	C8orf37	T/C	0.4472	0.0036	0.0018	0.04	672989
rs2172229	11:27776622	0	BDNF	A/G	0.5983	0.0037	0.0018	0.04	680837
rs1883005	15:25465999	0	UBE3A	A/G	0.4785	-0.0036	0.0017	0.04	715651
rs2930580	15:25841732	0	UBE3A	T/G	0.08402	0.0065	0.0032	0.04	687363
rs12232308	15:93409054	1	CHD2	A/G	0.5923	0.0037	0.0018	0.04	691130
rs11632071	15:93728888	0	CHD2	A/G	0.07408	-0.0066	0.0032	0.04	566884
rs8072971	17:17391443	1	RAI1	C/G	0.1273	-0.0054	0.0026	0.04	691829
rs6053314	20:5309726	6	PROKR2	T/C	0.96802	-0.0096	0.0047	0.04	686114
rs2274092	6:84911336	0	MRAP2	T/C	0.3103	-0.004	0.0019	0.041	656017
rs2841292	6:100793443	0	SIM1	T/C	0.6769	-0.0038	0.0019	0.041	679061
rs7814035	8:96301273	1	C8orf37	T/C	0.06881	-0.007	0.0034	0.041	692570
rs10732804	10:112795021	6	BBIP1	A/G	0.05706	-0.0074	0.0036	0.041	795081
rs7073594	10:112714497	7	BBIP1	A/G	0.05127	-0.0077	0.0038	0.041	692025
rs4340301	15:25876357	0	UBE3A	A/C	0.47	0.0036	0.0018	0.041	685456
rs4784654	16:56362881	2	BBS2	A/C	0.3355	0.0038	0.0019	0.041	688160
rs4784693	16:56631559	2	BBS2	T/C	0.1315	0.0053	0.0026	0.041	690670
rs16991555	20:10402591	0	MKKS	T/C	0.9468	0.0078	0.0038	0.041	691938
rs2057291	20:57472043	6	GNAS	A/G	0.3391	0.0037	0.0018	0.041	688481
rs12211611	6:57065443	3	RAB23	C/G	0.1964	0.0045	0.0022	0.042	689226
rs16879126	7:33060306	4	BBS9	A/C	0.93493	-0.007	0.0034	0.042	688701
rs13285982	9:119579244	2	TRIM32	A/G	0.4718	0.0033	0.0016	0.042	786932
rs1482797	11:7851012	9	TUB	T/C	0.03917	-0.0091	0.0045	0.042	691654
rs7176242	15:25877721	4	UBE3A	A/G	0.2254	-0.0043	0.0021	0.042	688262
rs7170382	15:93415051	0	CHD2	C/G	0.6373	-0.0037	0.0018	0.042	676460
rs2587891	16:56369165	0	BBS2	A/C	0.2547	0.0041	0.002	0.042	688254
rs4783950	16:56711558	2	BBS2	T/C	0.5758	-0.0037	0.0018	0.042	677926
rs7215531	17:56493374	2	MKS1	A/T	0.8225	-0.0047	0.0023	0.042	689714
rs9611502	22:41531236	3	EP300	T/C	0.03929	-0.0094	0.0046	0.042	675715
rs11685079	2:63374600	6	WDPCP	T/C	0.111	-0.0056	0.0028	0.043	689889
rs6708611	2:64168232	3	WDPCP	A/G	0.225	0.0041	0.002	0.043	692481
rs10086419	8:117744771	24	RAD21	T/C	0.8838	-0.0056	0.0028	0.043	691925
rs12336175	9:119645481	0	TRIM32	A/G	0.08945	0.006	0.003	0.043	689757
rs379951	11:8272605	0	TUB	A/G	0.4363	0.0036	0.0018	0.043	669871
rs9806206	15:25864186	0	UBE3A	C/G	0.794	0.0044	0.0022	0.043	690288
rs151347	20:57589174	3	GNAS	T/C	0.4624	-0.0035	0.0017	0.043	685974
rs2699396	2:63488790	5	WDPCP	T/C	0.4153	0.0033	0.0016	0.044	792215
rs7704118	5:36683684	0	NIPBL	C/G	0.8508	0.0055	0.0027	0.044	641154
rs6459187	6:57169306	0	RAB23	T/C	0.7272	-0.0039	0.0019	0.044	679525
rs833480	12:49278861	1	KMT2D	A/G	0.8054	-0.0044	0.0022	0.044	686021
rs4363696	12:88316486	0	CEP290	T/C	0.97404	0.0094	0.0047	0.044	635807
rs12324359	15:24978912	0	NPAP1	T/C	0.3708	0.0037	0.0019	0.044	662502
rs2241953	16:56378611	0	BBS2	A/G	0.3058	0.0038	0.0019	0.044	680497
rs1949411	2:63571808	2	WDPCP	T/C	0.1694	-0.0044	0.0022	0.045	793948
rs6723613	2:64168149	3	WDPCP	T/C	0.7416	-0.004	0.002	0.045	690810
rs2286489	3:45804069	0	LZTFL1	T/C	0.6253	-0.0036	0.0018	0.045	683688
rs167306	3:97384488	2	ARL6	T/C	0.724	-0.0039	0.0019	0.045	692518
rs2390352	4:123558330	0	BBS12	T/C	0.95106	0.0077	0.0039	0.045	771365
rs308428	4:123764508	5	BBS12	A/G	0.862	-0.0048	0.0024	0.045	769894
rs11759084	6:100729505	5	SIM1	C/G	0.2223	0.0041	0.0021	0.045	692532
rs4243687	14:89475997	3	TTC8	A/G	0.3941	0.0036	0.0018	0.045	692421
rs7177637	15:93694157	3	CHD2	A/T	0.93107	-0.0069	0.0034	0.045	689071
rs11689644	2:63709708	0	WDPCP	T/G	0.90961	0.0059	0.0029	0.046	692236
rs2322157	3:71879031	0	PROK2	A/C	0.1399	0.0051	0.0025	0.046	691828
rs9997310	4:122628680	2	BBS7	A/G	0.8925	0.0056	0.0028	0.046	688301
rs1565449	9:87650969	0	NTRK2	A/G	0.02356	-0.0124	0.0062	0.046	658570
rs11137281	9:140760661	1	EHMT1	T/C	0.1877	-0.0045	0.0023	0.046	664468
rs11195232	10:112375282	0	SMC3	A/G	0.2706	0.0042	0.0021	0.046	650595
rs11168751	12:49219138	0	KMT2D	C/G	0.8183	-0.0047	0.0023	0.046	668408
rs12232396	16:56690182	0	BBS2	T/C	0.2163	-0.0043	0.0021	0.046	659303
rs738514	22:37080738	0	IFT27	C/G	0.7078	0.0039	0.002	0.046	662466
rs6765942	3:71936021	8	PROK2	T/C	0.2179	0.0042	0.0021	0.047	688505
rs6890097	5:36714918	4	NIPBL	T/C	0.1967	-0.0044	0.0022	0.047	686698
rs4129472	5:42523172	0	GHR	T/C	0.8033	0.0043	0.0022	0.047	671467
rs12195875	6:57063946	0	RAB23	A/G	0.8127	-0.0042	0.0021	0.047	795098
rs16889293	8:117952142	0	RAD21	T/C	0.2974	-0.0042	0.0021	0.047	598765
rs11990353	8:118044282	1	RAD21	A/C	0.05198	-0.0072	0.0036	0.047	791873
rs11140685	9:87222709	0	NTRK2	T/C	0.92891	0.0067	0.0034	0.047	678090
rs13300554	9:139357939	0	INPP5E	A/G	0.97919	0.0153	0.0077	0.047	525193
rs4526432	9:140734161	1	EHMT1	T/C	0.5541	-0.0034	0.0017	0.047	691921
rs417210	11:8269405	1	TUB	T/G	0.6576	-0.0035	0.0018	0.047	775491
rs2369125	12:76580798	0	BBS10	C/G	0.1117	-0.0055	0.0028	0.047	672819
rs2283967	22:36963533	1	IFT27	T/C	0.2564	-0.0041	0.0021	0.047	655819
rs7614342	3:45940817	0	LZTFL1	A/T	0.8417	-0.0043	0.0022	0.048	788280
rs3778033	6:100875516	1	SIM1	T/C	0.7978	-0.0042	0.0021	0.048	692597
rs10519485	15:25602101	0	UBE3A	A/C	0.98877	0.0151	0.0076	0.048	521585
rs2930599	15:25855001	8	UBE3A	A/G	0.3156	-0.0037	0.0019	0.048	692166
rs9935360	16:56576390	0	BBS2	T/C	0.553	-0.0036	0.0018	0.048	672324
rs6076810	20:5305638	6	PROKR2	A/G	0.96825	-0.0093	0.0047	0.048	674757
rs6070620	20:57384175	0	GNAS	T/C	0.1905	0.0043	0.0022	0.048	678262
rs12045585	1:243673099	0	SDCCAG8	A/G	0.132	-0.0053	0.0027	0.049	672227
rs11683408	2:64193684	0	WDPCP	T/C	0.1046	0.0055	0.0028	0.049	690304
rs11889511	2:170197354	6	BBS5	C/G	0.8008	-0.0043	0.0022	0.049	691775
rs7713754	5:132295316	0	AFF4	T/C	0.98088	0.0122	0.0062	0.049	593798
rs13218361	6:100788251	0	SIM1	T/C	0.09302	-0.0064	0.0032	0.049	574072
rs477286	9:87770869	6	NTRK2	A/G	0.4981	0.0034	0.0017	0.049	691791
rs16934016	9:119652372	4	TRIM32	A/T	0.01041	-0.0161	0.0082	0.049	670060
rs1341056	10:112513913	2	BBIP1/SMC	T/C	0.4141	-0.0034	0.0017	0.049	690828
rs7925108	11:66234023	4	BBS1	A/G	0.4032	0.0034	0.0017	0.049	692306
rs2177077	15:24067646	1	MAGEL2/MKRN3/NDN	T/C	0.5443	-0.0035	0.0018	0.049	675708
rs1967309	16:4065583	0	CREBBP	A/G	0.4052	-0.0035	0.0018	0.049	653210
rs8052906	16:4111291	1	CREBBP	A/T	0.7815	-0.0041	0.0021	0.049	685506
rs182221	16:56599221	0	BBS2	C/G	0.2059	0.0043	0.0022	0.049	689240
rs4784724	16:56745758	0	BBS2	T/G	0.7631	-0.004	0.002	0.049	693092
rs6077718	20:10261142	6	MKKS	T/G	0.8588	-0.0049	0.0025	0.049	692587
rs2284299	20:10266247	14	MKKS	A/T	0.93797	-0.0071	0.0036	0.049	691968
rs235195	20:57545765	0	GNAS	A/G	0.1299	-0.0056	0.0028	0.049	658803
rs11683229	2:63596836	5	WDPCP	A/G	0.8859	0.0053	0.0027	0.05	691685
rs12547260	8:100916000	1	VPS13B	T/C	0.8488	-0.0048	0.0024	0.05	677347
rs10505288	8:117753791	2	RAD21	T/C	0.1412	-0.0049	0.0025	0.05	691886
rs7026417	9:87589165	3	NTRK2	T/C	0.90061	0.0055	0.0028	0.05	692304
rs4429143	12:88409194	1	CEP290	A/G	0.3834	0.0035	0.0018	0.05	668830
rs1033875	14:89530904	8	TTC8	A/C	0.2646	-0.0039	0.002	0.05	676889
rs9848607	3:71760395	0	PROK2	T/C	0.8698	0.0053	0.0027	0.051	627160
rs1355188	5:42362473	0	GHR	A/G	0.4363	0.0034	0.0018	0.051	691716
rs13299931	9:87743280	6	NTRK2	A/G	0.7417	0.0037	0.0019	0.051	787486
rs329208	9:87807908	3	NTRK2	A/G	0.7975	-0.004	0.002	0.051	794491
rs7897445	10:112872557	0	BBIP1	T/C	0.3	-0.0037	0.0019	0.051	684508
rs4906728	15:25838550	3	UBE3A	T/C	0.7244	-0.0037	0.0019	0.051	689140
rs9622424	22:36984307	5	IFT27	T/C	0.2867	-0.0037	0.0019	0.051	691342
rs2159272	3:45829995	0	LZTFL1	A/G	0.5599	0.0034	0.0017	0.052	692531
rs17732043	8:96331934	0	C8orf37	A/G	0.1108	-0.0054	0.0028	0.052	680208
rs958637	8:117948986	0	RAD21	T/C	0.9161	-0.0067	0.0034	0.052	588500
rs2453469	12:49219569	0	KMT2D	A/G	0.6051	-0.0036	0.0018	0.052	619633
rs2531961	16:4089074	4	CREBBP	T/C	0.1084	0.0054	0.0028	0.052	692466
rs4646406	17:17417169	2	RAI1	A/T	0.5206	0.0034	0.0017	0.052	691479
rs12150325	17:56438433	0	MKS1	T/C	0.03754	-0.0092	0.0047	0.052	665648
rs10485483	20:5158354	16	PROKR2	A/C	0.07723	0.0063	0.0032	0.052	691518
rs12625905	20:5354819	4	PROKR2	T/G	0.6995	0.0037	0.0019	0.052	692577
rs3787493	20:57481148	2	GNAS	A/G	0.4835	-0.0034	0.0017	0.052	692603
rs3776586	5:36684550	1	NIPBL	T/C	0.7858	0.0041	0.0021	0.053	674534
rs2480201	6:84805699	0	MRAP2	T/C	0.05583	0.0076	0.0039	0.053	687587
rs7750764	6:100722593	0	SIM1	T/C	0.1373	0.005	0.0026	0.053	689419
rs17421554	9:87792261	0	NTRK2	A/C	0.95329	0.0076	0.0039	0.053	653556
rs4758287	11:8099913	0	TUB	A/C	0.2882	0.0038	0.0019	0.053	679358
rs10769890	11:8277060	1	TUB	C/G	0.723	-0.0036	0.0019	0.053	774277
rs12914691	15:25826050	6	UBE3A	T/G	0.2011	-0.0042	0.0022	0.053	692259
rs6496996	15:93402496	2	CHD2	A/G	0.2024	0.0042	0.0022	0.053	691787
rs2144650	20:57535425	1	GNAS	T/C	0.95077	-0.0083	0.0043	0.053	670881
rs13064137	3:71765782	2	PROK2	C/G	0.09074	0.0057	0.003	0.054	691832
rs10121443	9:87727839	0	NTRK2	T/G	0.2999	-0.0038	0.002	0.054	667574
rs13290979	9:139425634	0	INPP5E	A/G	0.627	0.0037	0.0019	0.054	574936
rs1891629	9:140396212	0	EHMT1	T/C	0.1767	-0.0047	0.0024	0.054	630391
rs4918514	10:112191525	0	SMC3	T/C	0.7556	0.004	0.0021	0.054	670190
rs3750625	10:112839601	0	BBIP1	A/C	0.04946	-0.0082	0.0043	0.054	664189
rs17798544	14:89093065	2	TTC8	A/G	0.01742	-0.013	0.0068	0.054	683951
rs2076371	22:38474696	0	SOX10	A/G	0.2784	0.0038	0.002	0.054	691712
rs12635700	3:71741557	1	PROK2	A/C	0.03449	-0.0092	0.0048	0.055	650172
rs935545	3:71778922	0	PROK2	C/G	0.7377	-0.0038	0.002	0.055	683454
rs11128229	3:71995436	11	PROK2	T/C	0.7254	0.0038	0.002	0.055	684924
rs11920820	3:71998854	0	PROK2	A/C	0.07805	-0.0067	0.0035	0.055	637269
rs7389498	9:140738231	0	EHMT1	A/G	0.4179	0.0034	0.0018	0.055	680687
rs1065375	16:56368689	2	BBS2	T/C	0.3862	0.0034	0.0018	0.055	691400
rs12447611	16:56576670	0	BBS2	C/G	0.2722	0.0038	0.002	0.055	687838
rs10369	20:57570456	0	GNAS	T/C	0.3258	-0.0038	0.002	0.055	630367
rs7290005	22:41742312	0	EP300	T/C	0.03461	-0.0075	0.0039	0.055	766301
rs869927	2:73542685	0	ALMS1	A/G	0.1379	0.0049	0.0026	0.056	668044
rs4733930	8:38311001	0	FGFR1	T/C	0.4242	0.0036	0.0019	0.056	612085
rs4837864	9:119544433	0	TRIM32	T/C	0.1042	-0.0056	0.003	0.056	667268
rs4979643	9:140638607	26	EHMT1	A/T	0.7084	-0.0036	0.0019	0.056	687697
rs11116464	12:76602307	7	BBS10	C/G	0.7529	0.0039	0.002	0.056	677099
rs12232335	15:25102218	1	NPAP1/SNURF	A/G	0.8489	0.0046	0.0024	0.056	686462
rs8029578	15:93279000	0	CHD2	A/G	0.7921	-0.004	0.0021	0.056	692589
rs17348221	2:63467915	0	WDPCP	A/C	0.98416	0.0165	0.0087	0.057	653888
rs12622978	2:170234446	0	BBS5	A/C	0.94457	-0.0077	0.0041	0.057	663580
rs3758317	9:87282615	1	NTRK2	T/C	0.1735	-0.0043	0.0023	0.057	690645
rs8004648	14:89394228	1	TTC8	T/C	0.8998	-0.0052	0.0027	0.057	783463
rs3935070	15:23784767	0	MAGEL2/MKRN3/NDN	C/G	0.4208	-0.0034	0.0018	0.057	669246
rs11161149	15:25120704	0	NPAP1/SNURF	A/G	0.3539	0.0036	0.0019	0.057	638466
rs1073519	20:57304273	3	GNAS	T/C	0.6385	0.0034	0.0018	0.057	691387
rs4812042	20:57461915	4	GNAS	A/G	0.6312	-0.0035	0.0018	0.057	678766
rs151352	20:57601995	2	GNAS	A/G	0.3434	0.0035	0.0018	0.057	691860
rs4820250	22:37197530	8	IFT27	A/G	0.1508	-0.0043	0.0023	0.057	792832
rs12490575	3:45792209	0	LZTFL1	T/C	0.1357	0.0049	0.0026	0.058	676364
rs292182	5:36954812	29	NIPBL	A/G	0.438	-0.0031	0.0016	0.058	794111
rs10501089	11:27788859	5	BDNF	T/C	0.0342	0.0083	0.0044	0.058	690360
rs1985749	17:56417002	0	MKS1	A/G	0.704	0.0037	0.002	0.058	676408
rs9867918	3:45807699	1	LZTFL1	C/G	0.1578	0.0045	0.0024	0.059	691550
rs1509451	5:42371359	50	GHR	T/G	0.192	0.0039	0.0021	0.059	782699
rs2910875	5:42719826	27	GHR	A/G	0.4491	-0.0032	0.0017	0.059	692569
rs11041791	11:8212242	5	TUB	T/C	0.702	-0.0033	0.0018	0.059	794149
rs4906693	15:25151839	0	SNURF	T/C	0.3685	0.0035	0.0019	0.059	671162
rs9619950	22:41565051	0	EP300	T/C	0.04671	0.0079	0.0042	0.059	649522
rs4283687	4:122663460	0	BBS7	A/G	0.674	-0.0035	0.0019	0.06	688380
rs1353979	5:36744574	0	NIPBL	C/G	0.5891	-0.0033	0.0018	0.06	686866
rs4866968	5:42851183	1	GHR	C/G	0.5485	0.0033	0.0017	0.06	691861
rs11782681	8:38518131	0	FGFR1	A/G	0.156	0.0045	0.0024	0.06	763109
rs3739570	9:87637578	0	NTRK2	A/G	0.08518	-0.0056	0.003	0.06	690261
rs11195116	10:112153284	0	SMC3	T/C	0.361	-0.0035	0.0018	0.06	685912
rs10787234	10:112180476	1	SMC3	C/G	0.6982	0.0034	0.0018	0.06	778363
rs12793160	11:8018292	0	TUB	A/G	0.02035	0.0125	0.0067	0.06	630784
rs1717853	15:24017340	1	MAGEL2/MKRN3/NDN	A/T	0.6893	0.0035	0.0019	0.06	685999
rs11853680	15:25144362	0	SNURF	T/C	0.1403	-0.005	0.0027	0.06	669500
rs16998801	22:38572484	0	SOX10	T/G	0.96545	0.0093	0.0049	0.06	685759
rs4852951	2:73869796	104	ALMS1	C/G	0.3576	0.0033	0.0018	0.061	691619
rs831012	2:170139862	0	BBS5	T/C	0.6661	-0.0036	0.0019	0.061	674244
rs3957418	6:100760409	0	SIM1	T/C	0.3831	-0.0035	0.0018	0.061	685029
rs7825829	8:38362521	0	FGFR1	A/G	0.90681	0.0057	0.003	0.061	675375
rs7034337	9:139376599	0	INPP5E	A/C	0.01824	-0.0151	0.008	0.061	497719
rs2453481	12:49248614	0	KMT2D	A/G	0.1704	-0.0044	0.0024	0.061	672658
rs130024	16:3834316	0	CREBBP	T/C	0.92861	-0.0068	0.0036	0.061	660372
rs6026629	20:57546540	1	GNAS	A/T	0.3361	0.0035	0.0019	0.061	681621
rs1440005	2:64174242	0	WDPCP	T/G	0.98158	-0.0128	0.0069	0.062	665723
rs708458	5:132208686	11	AFF4	A/G	0.09583	0.0055	0.0029	0.062	692567
rs1395117	6:100778037	16	SIM1	T/C	0.645	-0.0033	0.0018	0.062	692532
rs1470769	8:96139617	0	C8orf37	T/C	0.302	0.0036	0.0019	0.062	680921
rs12238811	9:87372352	5	NTRK2	T/C	0.04408	-0.0078	0.0042	0.062	691994
rs2279861	11:66133336	18	BBS1	A/G	0.3147	-0.0035	0.0019	0.062	692586
rs181261	17:56218713	1	MKS1	T/C	0.1183	0.0052	0.0028	0.062	683852
rs4822024	22:41757647	23	EP300	A/G	0.2229	0.0038	0.0021	0.062	692561
rs4707035	6:84935635	0	MRAP2	A/C	0.2595	-0.0038	0.0021	0.063	657969
rs3104926	8:96472838	6	C8orf37	A/G	0.02017	0.0117	0.0063	0.063	680209
rs10107791	8:100970952	0	VPS13B	T/C	0.1137	0.0055	0.003	0.063	544119
rs1008531	15:25825753	6	UBE3A	A/C	0.6342	-0.0032	0.0017	0.063	787762
rs7192369	16:56576806	0	BBS2	A/G	0.4771	0.0033	0.0018	0.063	688042
rs6038080	20:5146631	14	PROKR2	T/C	0.90803	-0.0057	0.003	0.063	691767
rs13013167	2:170402629	2	BBS5	T/C	0.1812	0.0042	0.0022	0.064	692058
rs10868223	9:87265126	0	NTRK2	T/C	0.1141	-0.0051	0.0027	0.064	690788
rs1129767	9:140638416	0	EHMT1	A/G	0.1889	0.0042	0.0023	0.064	688096
rs10858403	12:76618120	0	BBS10	T/C	0.3737	0.0034	0.0018	0.064	667949
rs6495024	15:73160603	8	BBS4	T/C	0.1006	-0.005	0.0027	0.064	788625
rs282233	16:56597483	12	BBS2	T/C	0.07601	0.0057	0.0031	0.064	771498
rs7185020	16:56729208	0	BBS2	C/G	0.0542	0.0073	0.004	0.064	686673
rs11899838	2:63478136	0	WDPCP	T/C	0.1268	0.0049	0.0026	0.065	690456
rs1035272	9:119308102	3	TRIM32	T/G	0.8963	-0.0052	0.0028	0.065	790828
rs4315130	12:76886005	0	BBS10	A/G	0.02777	0.0104	0.0056	0.065	617516
rs6070675	20:57552033	4	GNAS	T/C	0.8379	0.0042	0.0023	0.065	692521
rs2421674	2:73955432	77	ALMS1	A/G	0.6553	-0.0033	0.0018	0.066	692599
rs10275880	7:33009257	0	BBS9	A/T	0.97287	0.011	0.006	0.066	513170
rs4295775	9:139300032	7	INPP5E	T/C	0.8658	-0.0046	0.0025	0.066	692350
rs1510997	11:7970198	11	TUB	A/G	0.08928	-0.0052	0.0028	0.066	794834
rs4777513	15:72800853	0	BBS4	A/G	0.7974	0.0038	0.0021	0.066	792325
rs8047140	16:29922988	0	KCTD13	T/C	0.1152	-0.0052	0.0028	0.066	620771
rs2113315	16:56597427	0	BBS2	A/G	0.5848	-0.0033	0.0018	0.066	682464
rs7195394	16:56720278	4	BBS2	A/G	0.4205	-0.0032	0.0018	0.066	684772
rs6108463	20:10280505	0	MKKS	T/C	0.8243	0.0043	0.0023	0.066	680184
rs13042676	20:57665959	0	GNAS	T/C	0.01339	-0.011	0.006	0.066	546748
rs2191027	3:45804391	0	LZTFL1	T/C	0.2974	-0.0035	0.0019	0.067	686344
rs10486537	7:33596515	3	BBS9	A/G	0.8956	-0.0053	0.0029	0.067	692605
rs13276275	8:101026725	0	VPS13B	A/G	0.3094	-0.0034	0.0019	0.067	681937
rs1446534	8:117957039	1	RAD21	T/C	0.2671	-0.0036	0.002	0.067	691881
rs1918849	11:8063419	1	TUB	A/G	0.8399	0.0044	0.0024	0.067	686938
rs824179	15:24022222	1	MAGEL2/MKRN3/NDN	C/G	0.7582	0.0038	0.0021	0.067	678511
rs285733	15:93228175	0	CHD2	A/G	0.05268	-0.0071	0.0039	0.067	681220
rs17702792	3:97416064	0	ARL6	T/C	0.8345	0.0043	0.0023	0.068	677398
rs10518404	4:123579141	4	BBS12	A/G	0.0808	0.0059	0.0032	0.068	692597
rs370617	4:123640865	18	BBS12	T/C	0.6797	-0.0034	0.0018	0.068	692580
rs6534365	4:123785448	4	BBS12	T/C	0.3479	-0.0033	0.0018	0.068	674700
rs7030327	9:119546021	0	TRIM32	A/C	0.5389	-0.0032	0.0017	0.068	684714
rs12471038	2:63484639	10	WDPCP	A/C	0.2016	-0.0039	0.0021	0.069	691108
rs4857288	3:97440269	0	ARL6	A/C	0.6784	-0.0034	0.0019	0.069	676959
rs6820411	4:123845269	8	BBS12	A/C	0.1417	0.0046	0.0025	0.069	691837
rs256869	5:132135372	1	AFF4	T/C	0.90844	-0.0056	0.0031	0.069	690126
rs12527599	6:100638537	0	SIM1	A/G	0.8268	0.0044	0.0024	0.069	664915
rs4076129	8:100969251	3	VPS13B	A/T	0.94007	-0.007	0.0039	0.069	667161
rs7926527	11:8099189	0	TUB	T/C	0.6473	-0.0033	0.0018	0.069	685840
rs17256183	16:3994696	4	CREBBP	T/C	0.9534	-0.0073	0.004	0.069	674197
rs17598731	2:63236321	0	WDPCP	C/G	0.95773	-0.0101	0.0056	0.07	655608
rs9865268	3:72019514	1	PROK2	T/C	0.4802	-0.0031	0.0017	0.07	683034
rs1960669	4:123782568	0	BBS12	A/C	0.1426	-0.0046	0.0025	0.07	675902
rs1387923	9:87640636	8	NTRK2	A/G	0.4336	-0.0031	0.0017	0.07	691339
rs17128415	10:112867829	1	BBIP1	T/C	0.0984	-0.0053	0.0029	0.07	674465
rs4146751	12:88335960	18	CEP290	A/G	0.8771	-0.0047	0.0026	0.07	691833
rs4313656	12:88374259	7	CEP290	T/C	0.01345	0.0145	0.008	0.07	645259
rs2930579	15:25841236	0	UBE3A	T/G	0.2684	0.0036	0.002	0.07	671060
rs4353441	15:93734959	0	CHD2	A/G	0.02625	0.012	0.0066	0.07	582306
rs2135976	4:122816181	1	BBS7	T/C	0.06519	0.0064	0.0035	0.071	692078
rs9367716	6:57160572	3	RAB23	T/G	0.3031	0.0032	0.0018	0.071	777045
rs7287350	22:37253239	0	IFT27	T/C	0.05367	-0.0078	0.0043	0.071	597000
rs6596093	5:132227677	12	AFF4	A/G	0.09466	0.0053	0.0029	0.072	692564
rs13161158	5:132407688	0	AFF4	T/C	0.93937	0.0068	0.0038	0.072	651975
rs10262995	7:33550041	0	BBS9	T/C	0.1162	-0.0049	0.0027	0.072	692544
rs7112171	11:8321802	0	TUB	A/G	0.9527	-0.0071	0.0039	0.072	770544
rs11076156	16:56578118	0	BBS2	A/G	0.5717	-0.0032	0.0018	0.072	690090
rs8124207	20:57522704	0	GNAS	C/G	0.1335	0.0048	0.0027	0.072	674470
rs11950346	5:36965357	0	NIPBL	A/G	0.03508	0.0074	0.0041	0.073	660722
rs12335077	8:38484612	0	FGFR1	A/G	0.3227	-0.0034	0.0019	0.073	685386
rs2501567	9:140529495	0	EHMT1	T/G	0.8344	-0.0043	0.0024	0.073	686133
rs2432541	16:56417533	1	BBS2	T/C	0.02496	0.0098	0.0055	0.073	671845
rs861239	2:170175109	5	BBS5	T/C	0.7054	-0.0033	0.0019	0.074	692556
rs6433120	2:170303507	7	BBS5	T/C	0.7053	-0.0034	0.0019	0.074	692536
rs9287915	2:170317008	17	BBS5	T/G	0.7848	-0.0037	0.0021	0.074	692357
rs3762839	4:122825364	0	BBS7	A/C	0.8624	-0.0045	0.0025	0.074	684155
rs4962227	9:140507688	13	EHMT1	T/C	0.8667	-0.0046	0.0026	0.074	691166
rs4918591	10:112553470	0	BBIP1/SMC	T/C	0.7227	0.0035	0.0019	0.074	684909
rs10769872	11:8153514	9	TUB	T/G	0.3226	0.0033	0.0018	0.074	691458
rs17124951	14:89370761	2	TTC8	T/C	0.8541	0.0044	0.0025	0.074	691724
rs4362366	15:23747125	4	MAGEL2/MKRN3/NDN	T/G	0.6165	-0.0033	0.0018	0.074	673743
rs6576432	15:23782525	0	MAGEL2/MKRN3/NDN	A/G	0.03637	-0.0091	0.0051	0.074	620864
rs12148636	15:23974858	0	MAGEL2/MKRN3/NDN	A/T	0.3434	0.0034	0.0019	0.074	636853
rs11636636	15:24117029	2	NDN	A/G	0.4625	-0.0031	0.0017	0.074	688214
rs924469	16:56689906	5	BBS2	T/C	0.6096	0.0031	0.0018	0.074	691220
rs748196	17:17422768	8	RAI1	T/G	0.4713	-0.0031	0.0017	0.074	688576
rs11869817	17:56254899	1	MKS1	C/G	0.1187	-0.0048	0.0027	0.074	683944
rs13038557	20:57337758	1	GNAS	T/C	0.6921	0.0034	0.0019	0.074	679150
rs235193	20:57544274	0	GNAS	A/C	0.4024	-0.0032	0.0018	0.074	678905
rs6742619	2:73905591	1	ALMS1	T/C	0.2987	0.0034	0.0019	0.075	687013
rs6748233	2:73941002	88	ALMS1	A/G	0.6447	-0.0032	0.0018	0.075	692063
rs10084869	4:123696907	3	BBS12	T/G	0.7164	-0.0035	0.0019	0.075	684925
rs1025288	5:36702864	0	NIPBL	A/C	0.3745	0.003	0.0017	0.075	767118
rs3877899	5:42801268	44	GHR	T/C	0.2402	-0.0036	0.002	0.075	692080
rs17469596	7:32972245	0	BBS9	A/G	0.7992	0.0039	0.0022	0.075	691106
rs2938860	8:118024548	0	RAD21	T/C	0.8304	-0.0041	0.0023	0.075	687797
rs17199009	16:3867081	0	CREBBP	A/G	0.94411	-0.0063	0.0035	0.075	673248
rs13332660	16:29905882	1	KCTD13	T/C	0.174	0.0039	0.0022	0.075	728482
rs3859113	16:56699967	0	BBS2	T/C	0.93101	-0.0064	0.0036	0.075	632947
rs884808	1:243653439	3	SDCCAG8	T/C	0.2225	-0.0036	0.0021	0.076	684714
rs830965	2:170157559	0	BBS5	A/G	0.2819	0.0035	0.0019	0.076	685869
rs12987535	2:170269320	0	BBS5	T/C	0.8813	-0.005	0.0028	0.076	626221
rs10064948	5:42315700	14	GHR	A/G	0.93668	0.0064	0.0036	0.076	692568
rs11636696	15:93576982	0	CHD2	T/C	0.4536	0.0031	0.0018	0.076	671462
rs13438351	7:33008635	0	BBS9	T/C	0.8389	0.0044	0.0025	0.077	684986
rs7001472	8:96363415	0	C8orf37	A/G	0.01736	0.0132	0.0075	0.077	648179
rs11145915	9:139302049	2	INPP5E	A/T	0.793	-0.0038	0.0021	0.077	690388
rs3790095	16:56329167	10	BBS2	T/G	0.1515	0.0043	0.0025	0.077	691744
rs6499839	16:56576608	0	BBS2	T/C	0.1019	0.0052	0.0029	0.077	676038
rs1008766	16:56639800	0	BBS2	C/G	0.5569	-0.0031	0.0018	0.077	691640
rs6108464	20:10283950	0	MKKS	T/C	0.5281	0.0033	0.0019	0.077	684308
rs2673162	2:170154277	0	BBS5	T/C	0.06045	0.0068	0.0039	0.078	676651
rs6877017	5:132484531	1	AFF4	T/G	0.94615	0.0072	0.0041	0.078	663694
rs7800610	7:33096267	8	BBS9	A/G	0.7881	-0.0038	0.0022	0.078	692049
rs1885793	10:112606771	0	BBIP1	A/T	0.93703	0.0073	0.0041	0.078	553370
rs11907058	20:10343298	0	MKKS	A/G	0.98854	-0.0157	0.0089	0.078	616853
rs8137456	22:37274443	2	IFT27	C/G	0.06917	-0.0061	0.0034	0.078	689336
rs13404446	2:27519254	5	IFT172	A/G	0.2549	0.0032	0.0018	0.079	795225
rs13086080	3:45762725	0	LZTFL1	T/C	0.1811	0.004	0.0023	0.079	678828
rs4995840	3:71748073	1	PROK2	T/C	0.1654	0.0041	0.0023	0.079	692565
rs401864	6:100961198	0	SIM1	T/C	0.92703	0.0061	0.0035	0.079	691988
rs12793805	11:8066051	0	TUB	C/G	0.4058	-0.0032	0.0018	0.079	680293
rs12438458	15:25804489	0	UBE3A	A/G	0.2635	0.0036	0.002	0.079	667503
rs6077853	20:10603750	18	MKKS	A/G	0.1661	0.0039	0.0022	0.079	794503
rs10504946	8:96301075	1	C8orf37	A/G	0.08805	-0.0054	0.0031	0.08	680707
rs6563	9:139389184	0	INPP5E	A/G	0.5113	0.0031	0.0018	0.08	735112
rs7083193	10:112175889	2	SMC3	T/C	0.257	-0.0035	0.002	0.08	684425
rs4568935	10:112385103	2	SMC3	A/G	0.6446	0.0032	0.0018	0.08	674212
rs10769866	11:8076151	0	TUB	C/G	0.645	0.0032	0.0018	0.08	681957
rs11630650	15:25859609	7	UBE3A	T/G	0.8385	0.0039	0.0022	0.08	793562
rs4815785	20:5281253	12	PROKR2	A/G	0.7477	-0.0035	0.002	0.08	692555
rs6107621	20:5327322	2	PROKR2	C/G	0.729	0.0034	0.0019	0.08	686196
rs2283970	22:36970287	0	IFT27	T/C	0.6673	0.0033	0.0019	0.08	665426
rs13025357	2:63777236	4	WDPCP	A/T	0.1946	-0.0036	0.0021	0.081	791967
rs13064991	3:45834811	0	LZTFL1	T/G	0.1704	-0.004	0.0023	0.081	682619
rs7835921	8:96276292	3	C8orf37	A/G	0.4856	-0.003	0.0017	0.081	689240
rs10839968	11:8057387	3	TUB	C/G	0.94224	0.0065	0.0037	0.081	688549
rs1794087	11:8259888	0	TUB	T/C	0.97878	-0.0117	0.0067	0.081	630581
rs129988	16:3763179	0	CREBBP	A/G	0.07314	0.0058	0.0033	0.081	671376
rs2239318	16:3924937	2	CREBBP	T/C	0.09711	-0.005	0.0029	0.081	692499
rs12485185	22:38560836	0	SOX10	T/C	0.03666	-0.0092	0.0053	0.081	572138
rs2291410	1:243716654	22	SDCCAG8	A/C	0.1803	0.0038	0.0022	0.082	690569
rs4735639	8:100743556	2	VPS13B	A/C	0.90692	-0.0052	0.003	0.082	691681
rs2165554	9:119479774	0	TRIM32	T/C	0.37	-0.0031	0.0018	0.082	683710
rs930465	9:119525465	6	TRIM32	T/C	0.3307	0.0032	0.0018	0.082	689088
rs7096359	10:112833561	5	BBIP1	T/C	0.90037	0.005	0.0028	0.082	692481
rs7480804	11:8109809	0	TUB	A/T	0.90862	0.0053	0.003	0.082	673743
rs11041838	11:8289087	0	TUB	C/G	0.1934	0.0038	0.0022	0.082	747446
rs10926958	1:243338216	16	SDCCAG8	A/C	0.6372	-0.003	0.0017	0.083	760026
rs830977	2:170179652	6	BBS5	C/G	0.6331	-0.0031	0.0018	0.083	691264
rs12616998	2:170230702	8	BBS5	T/C	0.5932	-0.003	0.0017	0.083	692543
rs17051380	4:122567863	0	BBS7	C/G	0.95486	0.007	0.004	0.083	767233
rs2892973	4:122842850	1	BBS7	T/C	0.6845	-0.0032	0.0019	0.083	689364
rs885446	9:139443989	0	INPP5E	T/C	0.05677	-0.0067	0.0039	0.083	659591
rs17762768	10:112518629	0	BBIP1/SMC	C/G	0.8653	0.0044	0.0025	0.083	678264
rs11041592	11:7849672	7	TUB	T/C	0.02847	-0.0093	0.0054	0.083	685972
rs3794702	16:3730613	0	CREBBP	A/T	0.1957	0.0038	0.0022	0.083	675189
rs2544371	2:170227070	0	BBS5	A/G	0.5484	0.003	0.0017	0.084	688565
rs12478303	2:170570636	0	BBS5	A/G	0.93294	-0.0062	0.0036	0.084	688517
rs830622	3:71677817	2	PROK2	T/C	0.8292	-0.004	0.0023	0.084	691012
rs17009073	3:71939885	0	PROK2	A/G	0.1618	-0.0041	0.0024	0.084	683962
rs4733951	8:38369831	8	FGFR1	A/C	0.1728	-0.004	0.0023	0.084	692359
rs10505282	8:117676559	22	RAD21	T/C	0.1166	0.0048	0.0028	0.084	692608
rs1856800	10:112309641	0	SMC3	A/T	0.1223	-0.0046	0.0027	0.084	691406
rs17136754	16:4118259	9	CREBBP	C/G	0.8517	0.0042	0.0024	0.084	692179
rs362584	20:10254475	1	MKKS	A/G	0.2898	-0.0033	0.0019	0.084	687355
rs2636320	1:243501056	12	SDCCAG8	A/C	0.5362	0.003	0.0017	0.085	691068
rs1399634	2:170244607	0	BBS5	A/T	0.8024	-0.0038	0.0022	0.085	690037
rs6971826	7:33569954	4	BBS9	T/G	0.5502	-0.003	0.0017	0.085	689699
rs17170324	7:33683841	0	BBS9	C/G	0.1299	-0.0045	0.0026	0.085	594823
rs10125636	9:119489471	0	TRIM32	T/C	0.4754	-0.0029	0.0017	0.085	775361
rs3849990	11:8218443	0	TUB	A/T	0.8038	-0.0037	0.0021	0.085	690260
rs17197894	12:76900956	11	BBS10	A/G	0.1959	-0.0038	0.0022	0.085	692314
rs1545144	15:93268453	0	CHD2	A/C	0.2307	0.0035	0.002	0.085	685496
rs4784708	16:56703914	0	BBS2	C/G	0.06057	-0.0066	0.0038	0.085	653007
rs2350631	17:17503544	0	RAI1	T/C	0.4772	-0.003	0.0017	0.085	686034
rs9611462	22:41423627	1	EP300	C/G	0.3473	0.0032	0.0018	0.085	691497
rs17472986	4:123774832	2	BBS12	A/G	0.08185	0.0056	0.0033	0.086	691035
rs11780215	8:118057538	0	RAD21	A/G	0.8265	-0.0039	0.0022	0.086	686829
rs12421620	11:66276576	0	BBS1	A/G	0.01883	0.0119	0.007	0.086	641807
rs718978	15:25774222	0	UBE3A	A/T	0.8072	-0.004	0.0023	0.086	664528
rs7262919	20:5357098	2	PROKR2	A/C	0.8969	0.0049	0.0029	0.086	677960
rs12630449	3:71750143	0	PROK2	A/G	0.8882	-0.0047	0.0027	0.087	679542
rs11145824	9:139280631	4	INPP5E	T/C	0.1694	0.0039	0.0023	0.087	692317
rs7913383	10:112321969	2	SMC3	T/C	0.92686	0.0058	0.0034	0.087	678431
rs2497109	6:84747816	5	MRAP2	A/G	0.04613	0.0075	0.0044	0.088	678366
rs4813023	20:10194246	0	MKKS	T/C	0.4121	0.003	0.0018	0.088	692576
rs6077841	20:10571493	0	MKKS	C/G	0.8899	-0.005	0.003	0.088	687126
rs929037	22:37130078	5	IFT27	A/G	0.03379	-0.0079	0.0046	0.088	678474
rs7660639	4:122960956	1	BBS7	A/C	0.02128	0.0102	0.006	0.089	665466
rs4733924	8:38438589	0	FGFR1	T/G	0.1166	-0.0047	0.0028	0.089	691414
rs11857025	15:25384432	3	SNURF/UBE3A	A/T	0.8998	0.0048	0.0028	0.089	782091
rs12168324	22:37041669	7	IFT27	A/G	0.97749	0.0097	0.0057	0.089	691270
rs7596218	2:170488866	12	BBS5	T/G	0.6911	-0.0032	0.0019	0.09	692598
rs7638902	3:45775018	8	LZTFL1	A/G	0.2598	0.0034	0.002	0.09	692053
rs13062487	3:71944243	0	PROK2	A/G	0.3286	0.0031	0.0019	0.09	682654
rs6991815	8:117825068	0	RAD21	A/G	0.8714	0.0044	0.0026	0.09	691873
rs1931114	9:87822415	11	NTRK2	A/C	0.7467	-0.0034	0.002	0.09	691363
rs11041815	11:8242864	0	TUB	T/G	0.1099	0.0046	0.0027	0.09	767766
rs4898527	12:49601989	0	KMT2D	A/T	0.04899	0.0068	0.004	0.09	670880
rs923080	15:25811024	5	UBE3A	C/G	0.94943	0.0068	0.004	0.09	691792
rs10520713	15:93233324	3	CHD2	T/G	0.1577	-0.004	0.0024	0.09	690079
rs592196	16:56575062	2	BBS2	T/G	0.7733	-0.0035	0.0021	0.09	692589
rs6085109	20:5311304	0	PROKR2	A/G	0.8349	0.0041	0.0024	0.09	683284
rs4821503	22:36978190	0	IFT27	T/C	0.5485	0.003	0.0018	0.09	672391
rs5751033	22:41471003	1	EP300	T/C	0.4086	0.003	0.0018	0.09	690271
rs6747506	2:73521882	4	ALMS1	A/T	0.93849	-0.0062	0.0037	0.091	682124
rs3820700	2:73716810	48	ALMS1	A/G	0.1394	0.0042	0.0025	0.091	692576
rs6873545	5:42631264	43	GHR	T/C	0.7284	0.0031	0.0018	0.091	793986
rs7738443	6:100642650	3	SIM1	A/C	0.6628	0.0031	0.0018	0.091	690399
rs301952	3:97370530	7	ARL6	T/G	0.4264	-0.0029	0.0017	0.092	692574
rs9692508	7:33152668	0	BBS9	A/G	0.0967	-0.005	0.003	0.092	665157
rs17496925	9:140640154	0	EHMT1	T/C	0.06443	0.006	0.0035	0.092	687606
rs8027906	15:23719829	4	MAGEL2/MKRN3	T/C	0.8978	-0.0051	0.003	0.092	684158
rs1974970	15:73116573	4	BBS4	A/G	0.1487	-0.0039	0.0023	0.092	793972
rs11643455	16:56343642	1	BBS2	T/C	0.1826	0.0039	0.0023	0.092	681497
rs17433014	22:41499822	0	EP300	A/G	0.03713	-0.0079	0.0047	0.092	682480
rs2897442	5:132049027	21	AFF4	T/C	0.7363	-0.0033	0.002	0.093	691188
rs16888728	8:117783975	14	RAD21	T/C	0.09711	-0.0047	0.0028	0.093	734037
rs7874869	9:87089350	1	NTRK2	A/C	0.03964	-0.0077	0.0046	0.093	678893
rs2501559	9:140565196	2	EHMT1	T/C	0.7284	-0.0032	0.0019	0.093	692508
rs743232	14:89398181	0	TTC8	A/G	0.06694	-0.006	0.0036	0.093	666935
rs4906715	15:25725296	4	UBE3A	A/T	0.96135	0.0075	0.0045	0.093	763775
rs4646400	17:17425858	1	RAI1	T/C	0.06326	-0.0058	0.0034	0.093	789620
rs1421093	2:64188651	11	WDPCP	T/C	0.5766	0.0029	0.0017	0.094	689726
rs2678822	8:96062601	1	C8orf37	A/G	0.659	0.0031	0.0018	0.094	692567
rs11140748	9:87361520	0	NTRK2	T/C	0.94837	0.0067	0.004	0.094	664155
rs7067787	10:112608097	2	BBIP1	A/G	0.04519	-0.0072	0.0043	0.094	650065
rs10767675	11:27924494	49	BDNF	T/C	0.1255	-0.0043	0.0026	0.094	692532
rs2345408	15:23727655	2	MAGEL2/MKRN3	A/G	0.3701	0.0031	0.0018	0.094	679327
rs8044810	16:56567104	2	BBS2	A/C	0.95966	-0.0071	0.0043	0.094	690496
rs2284061	22:38543965	8	SOX10	A/C	0.01795	0.0111	0.0066	0.094	690924
rs13013890	2:63654109	0	WDPCP	A/G	0.1135	-0.0046	0.0027	0.095	687048
rs16887551	8:38470624	0	FGFR1	A/G	0.3138	-0.0032	0.0019	0.095	686001
rs11781447	8:96102659	4	C8orf37	T/C	0.2032	0.0036	0.0022	0.095	687839
rs11140831	9:87647454	0	NTRK2	A/G	0.4764	-0.003	0.0018	0.095	669399
rs1406094	11:8061926	0	TUB	A/C	0.1202	0.0044	0.0026	0.095	760990
rs4923507	11:27932280	0	BDNF	T/C	0.8077	0.0036	0.0022	0.095	689690
rs1903251	15:24104547	1	NDN	A/T	0.6103	0.003	0.0018	0.095	680776
rs7180310	15:25339337	0	SNURF	A/C	0.05741	0.0062	0.0037	0.095	678987
rs151358	20:57610059	1	GNAS	A/C	0.2229	-0.0034	0.0021	0.095	692205
rs4821536	22:37209447	6	IFT27	T/C	0.92511	0.0055	0.0033	0.095	690986
rs7603593	2:63458074	3	WDPCP	T/C	0.7722	-0.0034	0.0021	0.096	690026
rs12533104	7:33639080	1	BBS9	T/G	0.06677	0.0058	0.0035	0.096	691250
rs885029	8:96476270	2	C8orf37	A/G	0.4605	0.0029	0.0017	0.096	690560
rs7389298	9:140755119	1	EHMT1	T/C	0.7931	-0.0038	0.0023	0.096	593420
rs10743052	11:8174966	10	TUB	A/G	0.3593	0.003	0.0018	0.096	691781
rs7496110	15:25347013	1	SNURF	A/G	0.403	0.0029	0.0018	0.096	687433
rs17705985	15:93677014	0	CHD2	A/T	0.7208	0.0033	0.002	0.096	668534
rs130005	16:3828348	4	CREBBP	A/G	0.8914	0.0046	0.0028	0.096	692245
rs9652855	17:56435080	0	MKS1	C/G	0.1196	0.0044	0.0027	0.096	680734
rs10927040	1:243731693	20	SDCCAG8	T/C	0.8194	-0.0037	0.0022	0.097	691338
rs327922	8:38450990	0	FGFR1	T/C	0.2714	0.0034	0.002	0.097	671947
rs10505293	8:118084951	9	RAD21	A/G	0.2568	0.0032	0.0019	0.097	692031
rs10885075	10:112749109	6	BBIP1	T/C	0.1791	-0.0037	0.0022	0.097	691172
rs2739826	15:25398344	4	SNURF/UBE3A	A/G	0.5792	0.0029	0.0018	0.097	691405
rs2072380	16:3738961	0	CREBBP	T/G	0.7561	0.0035	0.0021	0.097	667078
rs7201546	16:29020294	1	SH2B1	T/C	0.1068	-0.0046	0.0028	0.097	672131
rs6108516	20:10357002	0	MKKS	A/G	0.135	-0.0043	0.0026	0.097	675613
rs4658570	1:243611301	1	SDCCAG8	T/C	0.04198	-0.0074	0.0045	0.098	686363
rs4141711	9:119471881	2	TRIM32	T/C	0.1763	0.0038	0.0023	0.098	691537
rs890632	20:57623551	0	GNAS	A/G	0.7936	0.0036	0.0022	0.098	680796
rs1466656	1:243526476	1	SDCCAG8	A/T	0.93937	0.0061	0.0037	0.099	687568
rs7382	2:27873415	27	IFT172	A/G	0.5664	-0.0027	0.0016	0.099	795285
rs13077861	3:71708437	1	PROK2	T/C	0.6233	0.003	0.0018	0.099	642646
rs6822844	4:123509421	3	BBS12	T/G	0.1663	0.0036	0.0022	0.099	793469
rs182662	6:57054008	0	RAB23	T/C	0.02502	-0.0111	0.0067	0.099	583828
rs4813925	20:10286313	1	MKKS	A/C	0.3552	0.003	0.0018	0.099	688841
rs3748471	20:10594619	0	MKKS	A/G	0.02344	0.0092	0.0056	0.099	677623
rs139873	22:38359667	0	SOX10	A/C	0.7406	-0.0033	0.002	0.099	687540
rs3755166	2:170219881	0	BBS5	A/G	0.4012	0.0029	0.0018	0.1	676869
rs6549411	3:71880648	1	PROK2	T/C	0.8165	-0.0037	0.0022	0.1	691914
rs17051392	4:122652662	3	BBS7	T/C	0.1358	-0.0042	0.0025	0.1	691316
rs10518290	4:122805872	0	BBS7	A/G	0.94726	-0.0066	0.004	0.1	687638
rs10067333	5:36710377	7	NIPBL	A/G	0.7363	0.0032	0.002	0.1	692367
rs11745128	5:36828019	2	NIPBL	A/G	0.8708	-0.0042	0.0026	0.1	691342
rs6459182	6:57126898	0	RAB23	A/G	0.6109	-0.0028	0.0017	0.1	771502
rs1324092	6:84992265	0	MRAP2	T/G	0.8936	0.0046	0.0028	0.1	692545
rs17060420	6:100811392	1	SIM1	A/G	0.91183	-0.005	0.0031	0.1	691479
rs17398251	7:33335960	6	BBS9	T/C	0.1663	-0.0037	0.0023	0.1	691343
rs2598409	7:33576738	0	BBS9	T/C	0.93177	-0.0057	0.0035	0.1	667306
rs7000581	8:96463206	1	C8orf37	T/C	0.02128	0.01	0.0061	0.1	672910
rs6468694	8:100865836	11	VPS13B	A/G	0.1303	0.0042	0.0026	0.1	692606
rs3780646	9:87559882	13	NTRK2	A/G	0.04081	0.0071	0.0043	0.1	692011
rs7026337	9:87568014	9	NTRK2	A/G	0.07612	0.0053	0.0033	0.1	691975
rs7850866	9:87820596	10	NTRK2	A/G	0.7494	-0.0033	0.002	0.1	692328
rs10884984	10:112255894	0	SMC3	T/C	0.2397	0.0034	0.002	0.1	688626
rs2181407	10:112534809	8	BBIP1/SMC	T/G	0.7011	-0.0031	0.0019	0.1	692335
rs11041681	11:7963691	2	TUB	A/G	0.02654	-0.0095	0.0058	0.1	679421
rs17244231	11:27832681	0	BDNF	T/C	0.03333	0.0086	0.0053	0.1	605886
rs940302	12:76710877	7	BBS10	A/G	0.4355	0.0028	0.0017	0.1	687406
rs4620771	12:76915817	20	BBS10	T/C	0.5239	0.0028	0.0017	0.1	691898
rs10133365	14:89464360	2	TTC8	A/G	0.0214	-0.0099	0.006	0.1	674658
rs8027177	15:23798842	1	MAGEL2/MKRN3/NDN	C/G	0.3872	0.0027	0.0017	0.1	786863
rs2739831	15:25406655	2	SNURF/UBE3A	A/G	0.1425	0.004	0.0025	0.1	691972
rs1467972	15:93245286	1	CHD2	A/G	0.7717	-0.0033	0.002	0.1	685508
rs7167675	15:93270322	0	CHD2	C/G	0.98953	0.0152	0.0093	0.1	643784
rs8039293	15:93565490	1	CHD2	C/G	0.5712	0.003	0.0018	0.1	666715
rs11630044	15:93684885	0	CHD2	T/C	0.3992	0.003	0.0018	0.1	669042
rs12449524	17:17596461	0	RAI1	A/C	0.2722	0.0032	0.002	0.1	688008
rs10853004	17:56271497	1	MKS1	A/G	0.6784	0.003	0.0019	0.1	685092
rs2865718	20:57526412	5	GNAS	A/G	0.7667	-0.0034	0.0021	0.1	691523
rs6070703	20:57621857	1	GNAS	T/C	0.1132	0.0046	0.0028	0.1	687285
rs11089864	22:38518360	0	SOX10	C/G	0.03204	0.0087	0.0053	0.1	661710
rs11807000	1:243398183	0	SDCCAG8	A/T	0.91271	0.0049	0.003	0.11	665379
rs4438460	2:63678069	0	WDPCP	T/C	0.93604	-0.0065	0.0041	0.11	542596
rs6546024	2:63921775	0	WDPCP	A/C	0.4168	0.0027	0.0017	0.11	688166
rs831006	2:170137491	1	BBS5	C/G	0.6038	-0.0029	0.0018	0.11	684201
rs16856986	2:170344115	4	BBS5	T/G	0.04566	0.0065	0.0041	0.11	691135
rs17008972	3:71756272	0	PROK2	A/G	0.1261	0.0042	0.0026	0.11	690384
rs13108660	4:122988105	3	BBS7	T/C	0.2657	0.0032	0.002	0.11	685048
rs1529461	5:36689363	0	NIPBL	A/G	0.2202	-0.0034	0.0021	0.11	682138
rs42913	5:36739367	1	NIPBL	T/C	0.5566	-0.0028	0.0017	0.11	678878
rs7743855	6:56898671	17	RAB23	A/G	0.2333	0.003	0.0019	0.11	791849
rs9390192	6:100741738	34	SIM1	T/C	0.2706	0.0031	0.0019	0.11	692575
rs17792460	6:100763922	2	SIM1	C/G	0.7675	-0.0033	0.002	0.11	690152
rs1506079	6:100798472	0	SIM1	T/C	0.09483	-0.0046	0.0028	0.11	745283
rs12202773	6:100824250	0	SIM1	A/G	0.09127	0.0046	0.0029	0.11	689883
rs1978332	7:33274869	0	BBS9	T/C	0.98439	-0.012	0.0075	0.11	649288
rs7779722	7:33598621	4	BBS9	A/G	0.4111	0.0028	0.0018	0.11	691424
rs17170431	7:33830939	4	BBS9	A/G	0.93282	0.0056	0.0035	0.11	690543
rs192714	8:96137455	4	C8orf37	A/G	0.6151	-0.0029	0.0018	0.11	692076
rs3020152	8:117916470	0	RAD21	A/C	0.5621	-0.0028	0.0017	0.11	684768
rs17744945	8:118028794	11	RAD21	T/G	0.8476	-0.0037	0.0023	0.11	692584
rs10868238	9:87530935	1	NTRK2	T/C	0.4045	0.0028	0.0018	0.11	691963
rs11140852	9:87704099	0	NTRK2	T/C	0.11	-0.0044	0.0028	0.11	692359
rs4837968	9:119641285	5	TRIM32	C/G	0.4039	-0.0028	0.0018	0.11	692192
rs3829109	9:139256766	0	INPP5E	A/G	0.2784	-0.003	0.0019	0.11	750465
rs12378717	9:139286060	7	INPP5E	C/G	0.2537	-0.0032	0.002	0.11	692565
rs6559262	9:140400894	0	EHMT1	C/G	0.5099	-0.0031	0.0019	0.11	533458
rs17127304	10:112134500	3	SMC3	T/C	0.09471	-0.0048	0.003	0.11	692565
rs11195176	10:112310942	9	SMC3	T/C	0.1385	0.004	0.0025	0.11	692351
rs11041671	11:7952957	1	TUB	A/G	0.1656	-0.0036	0.0023	0.11	689589
rs1554277	12:76574560	0	BBS10	T/C	0.2018	-0.0034	0.0022	0.11	685070
rs11837778	12:76687418	0	BBS10	A/T	0.716	0.0031	0.0019	0.11	686857
rs10861494	12:76813872	7	BBS10	A/G	0.8851	0.0044	0.0028	0.11	691734
rs2041859	12:88724929	1	CEP290	T/C	0.8333	-0.0035	0.0022	0.11	691885
rs12895772	14:89196817	0	TTC8	T/C	0.9375	-0.006	0.0038	0.11	672507
rs1608962	15:23750690	7	MAGEL2/MKRN3/NDN	T/C	0.3669	0.0029	0.0018	0.11	686278
rs11637292	15:23765819	1	MAGEL2/MKRN3/NDN	A/G	0.203	0.0036	0.0022	0.11	671763
rs824207	15:24007729	1	MAGEL2/MKRN3/NDN	A/G	0.4691	-0.0028	0.0018	0.11	688369
rs4267267	15:24031053	3	MAGEL2/MKRN3/NDN	A/G	0.5181	0.0027	0.0017	0.11	688819
rs1722842	15:24030956	0	MAGEL2/MKRN3/NDN	T/C	0.8252	-0.0035	0.0022	0.11	689607
rs1037461	15:25064327	1	NPAP1/SNURF	A/G	0.93124	-0.0057	0.0036	0.11	683873
rs2714772	15:25436068	3	SNURF/UBE3A	T/G	0.8929	-0.0045	0.0028	0.11	688030
rs11631923	15:25764385	7	UBE3A	T/C	0.6746	0.0029	0.0018	0.11	692254
rs17539990	15:93722795	1	CHD2	C/G	0.7539	0.0034	0.0021	0.11	584615
rs2285880	16:3576396	0	CREBBP	A/T	0.98246	0.0115	0.0072	0.11	632898
rs8052106	16:56635101	0	BBS2	A/G	0.6897	-0.003	0.0019	0.11	688802
rs4783946	16:56651309	2	BBS2	T/G	0.1125	-0.0044	0.0027	0.11	754948
rs747770	17:17446103	10	RAI1	T/C	0.3961	-0.0028	0.0018	0.11	685915
rs12948060	17:17477384	11	RAI1	T/C	0.415	-0.0028	0.0017	0.11	691820
rs6085122	20:5329782	6	PROKR2	T/C	0.2041	-0.0034	0.0021	0.11	690235
rs6133875	20:10330596	6	MKKS	T/C	0.7845	0.0034	0.0021	0.11	687973
rs6104583	20:10337546	4	MKKS	A/G	0.6777	0.0029	0.0019	0.11	692553
rs2050140	22:36971957	0	IFT27	A/C	0.4147	-0.0028	0.0018	0.11	673574
rs3788521	22:36992487	1	IFT27	C/G	0.1033	-0.0047	0.0029	0.11	643134
rs8137446	22:37347959	7	IFT27	T/C	0.1353	-0.0041	0.0026	0.11	681927
rs5995370	22:37366826	1	IFT27	T/C	0.92803	-0.0056	0.0035	0.11	680844
rs8135665	22:38476276	0	SOX10	T/C	0.1986	0.0035	0.0022	0.11	683318
rs9623300	22:41386084	0	EP300	C/G	0.9092	0.0051	0.0032	0.11	679779
rs12170305	22:41742283	0	EP300	A/G	0.05209	0.0062	0.0038	0.11	675480
rs780396	2:73694764	1	ALMS1	A/G	0.843	-0.0037	0.0024	0.12	691344
rs9990060	3:46125575	11	LZTFL1	A/G	0.759	-0.0031	0.002	0.12	692168
rs9310222	3:71885614	1	PROK2	A/C	0.1152	0.0042	0.0027	0.12	687348
rs4677057	3:71931914	0	PROK2	A/G	0.5937	-0.0028	0.0018	0.12	670011
rs4857287	3:97435665	0	ARL6	T/G	0.04519	0.0073	0.0047	0.12	660386
rs13111903	4:122613411	0	BBS7	T/C	0.95352	0.0067	0.0044	0.12	654072
rs7680787	4:122624065	0	BBS7	T/C	0.6337	-0.0026	0.0017	0.12	795586
rs17517926	4:122966288	0	BBS7	A/C	0.04473	0.0067	0.0044	0.12	669408
rs6844999	4:123581235	15	BBS12	T/G	0.8563	0.0035	0.0023	0.12	793114
rs4130114	5:42514509	15	GHR	T/G	0.5411	0.0027	0.0017	0.12	692315
rs1330630	6:57147549	4	RAB23	C/G	0.07185	-0.0051	0.0033	0.12	692448
rs2658153	6:100784837	5	SIM1	A/G	0.09255	0.0047	0.003	0.12	692588
rs12154346	7:33543638	0	BBS9	A/G	0.8853	0.0044	0.0028	0.12	685346
rs17170282	7:33573216	0	BBS9	A/G	0.97042	0.0083	0.0053	0.12	675806
rs12677998	8:38249201	0	FGFR1	A/G	0.09167	-0.0042	0.0027	0.12	679735
rs17581781	8:38410557	0	FGFR1	A/G	0.1889	-0.0035	0.0022	0.12	669404
rs10808675	8:96120302	2	C8orf37	A/G	0.5809	-0.0027	0.0017	0.12	691797
rs3133754	8:96444602	0	C8orf37	T/C	0.1507	0.0038	0.0025	0.12	674034
rs12674812	8:100848480	2	VPS13B	A/G	0.8252	0.0035	0.0023	0.12	685980
rs6469670	8:118049990	0	RAD21	T/C	0.05157	-0.0063	0.004	0.12	673031
rs17665254	8:118058596	0	RAD21	T/G	0.1945	0.0033	0.0022	0.12	680657
rs7016437	8:118060748	4	RAD21	T/C	0.1351	0.0038	0.0025	0.12	691731
rs4433222	9:87097512	0	NTRK2	A/C	0.8672	-0.004	0.0026	0.12	692590
rs11788721	9:87203787	3	NTRK2	T/C	0.1537	-0.0037	0.0023	0.12	789012
rs1867283	9:87450766	0	NTRK2	A/G	0.496	-0.0027	0.0018	0.12	683830
rs11788989	9:87541540	10	NTRK2	T/C	0.96264	-0.0073	0.0047	0.12	691298
rs2378672	9:87631034	0	NTRK2	T/C	0.92388	-0.005	0.0032	0.12	688645
rs1135314	9:139258462	0	INPP5E	A/G	0.6714	0.0029	0.0019	0.12	678152
rs11574905	9:139397426	1	INPP5E	A/G	0.04578	-0.0069	0.0045	0.12	588837
rs11145770	9:139427066	0	INPP5E	T/C	0.3692	-0.003	0.0019	0.12	576004
rs1541050	10:112184984	0	SMC3	T/C	0.4179	0.0028	0.0018	0.12	683825
rs11195135	10:112196353	10	SMC3	A/G	0.7218	-0.003	0.0019	0.12	692382
rs7912920	10:112534511	7	BBIP1/SMC	C/G	0.1058	0.0044	0.0028	0.12	689504
rs2065779	10:112877801	0	BBIP1	C/G	0.1033	-0.0045	0.0029	0.12	688683
rs10769873	11:8157610	6	TUB	T/C	0.7618	-0.0031	0.002	0.12	692105
rs7104230	11:27515109	12	BDNF	T/C	0.4544	0.0025	0.0016	0.12	794234
rs10777239	12:76659180	33	BBS10	A/C	0.7851	0.0033	0.0021	0.12	692444
rs4018628	12:76723617	0	BBS10	A/G	0.7987	0.0034	0.0022	0.12	685824
rs12320540	12:88401806	33	CEP290	A/G	0.09331	0.0044	0.0028	0.12	794997
rs17204164	14:89151392	0	TTC8	A/C	0.08828	-0.0049	0.0031	0.12	688819
rs1885189	14:89387328	2	TTC8	T/G	0.6361	-0.0028	0.0018	0.12	691028
rs9635419	15:24965831	0	NPAP1	A/G	0.95574	-0.0092	0.0059	0.12	488984
rs1498305	15:25071966	0	NPAP1/SNURF	T/C	0.8475	-0.0038	0.0025	0.12	685462
rs12917037	15:25747008	3	UBE3A	A/G	0.7871	-0.0033	0.0021	0.12	689003
rs12442570	15:25777257	1	UBE3A	C/G	0.1331	-0.0042	0.0027	0.12	664873
rs10873605	15:25843032	0	UBE3A	A/G	0.6871	0.003	0.0019	0.12	683636
rs11639393	15:25851096	8	UBE3A	T/C	0.1789	-0.0035	0.0022	0.12	691968
rs12101782	15:93357385	0	CHD2	T/C	0.02128	0.0099	0.0063	0.12	686455
rs1978300	16:4002022	0	CREBBP	A/G	0.8766	0.0043	0.0028	0.12	673605
rs4784718	16:56732125	1	BBS2	A/G	0.2753	0.0031	0.002	0.12	685205
rs8064558	17:17444277	17	RAI1	T/G	0.93744	0.0056	0.0036	0.12	688005
rs6516030	20:5371499	0	PROKR2	A/G	0.433	-0.0028	0.0018	0.12	691217
rs363010	20:10281572	0	MKKS	A/G	0.03876	-0.0073	0.0047	0.12	607521
rs6032871	20:10368744	0	MKKS	C/G	0.8068	0.0035	0.0023	0.12	679987
rs6077793	20:10422512	3	MKKS	T/G	0.1111	-0.0042	0.0027	0.12	692293
rs6100269	20:57479276	0	GNAS	T/C	0.09916	0.0046	0.003	0.12	672590
rs3788520	22:36980951	4	IFT27	T/C	0.2485	-0.0032	0.002	0.12	683802
rs5750309	22:37199022	1	IFT27	T/C	0.3415	0.0029	0.0019	0.12	683758
rs713953	22:37233323	3	IFT27	T/C	0.90803	0.0047	0.003	0.12	678080
rs1561535	2:27471025	1	IFT172	T/C	0.2833	0.0028	0.0018	0.13	782114
rs7559197	2:63937382	4	WDPCP	A/G	0.04818	-0.0063	0.0042	0.13	692074
rs17008864	2:73442516	0	ALMS1	T/C	0.90768	-0.0045	0.003	0.13	680298
rs1052161	2:73828538	58	ALMS1	A/G	0.629	-0.0025	0.0017	0.13	795520
rs17434655	2:73923089	80	ALMS1	T/C	0.3655	0.0027	0.0018	0.13	692592
rs13002827	2:170228677	0	BBS5	T/C	0.7972	-0.0032	0.0021	0.13	690967
rs7585733	2:170519682	6	BBS5	T/C	0.1808	0.0034	0.0023	0.13	692493
rs2742408	3:45697817	0	LZTFL1	A/G	0.91926	0.0046	0.003	0.13	666238
rs2253979	3:45773320	21	LZTFL1	A/G	0.3451	0.0027	0.0018	0.13	692606
rs13086717	3:46139499	0	LZTFL1	A/G	0.8121	0.0034	0.0023	0.13	690321
rs1491953	3:46142032	0	LZTFL1	T/C	0.4626	-0.0026	0.0017	0.13	687634
rs9310219	3:71744801	0	PROK2	A/G	0.1597	0.0037	0.0024	0.13	677842
rs4857302	3:97660106	31	ARL6	A/C	0.4885	-0.0026	0.0017	0.13	692538
rs4833753	4:122550874	0	BBS7	A/G	0.4611	0.0026	0.0017	0.13	690204
rs6534309	4:122609929	1	BBS7	T/C	0.91645	0.0047	0.0031	0.13	691973
rs1965582	4:122947939	7	BBS7	A/G	0.9475	0.0057	0.0038	0.13	692341
rs254290	5:132179721	0	AFF4	A/G	0.1541	0.0039	0.0026	0.13	623798
rs2480181	6:84740396	0	MRAP2	A/G	0.04151	0.007	0.0046	0.13	677853
rs9403683	6:100802068	1	SIM1	A/C	0.8724	-0.0037	0.0025	0.13	792525
rs2392246	7:33571828	3	BBS9	T/C	0.5286	-0.0026	0.0017	0.13	692592
rs2932005	8:38231874	0	FGFR1	T/C	0.3343	-0.0028	0.0018	0.13	688956
rs894153	8:96232747	1	C8orf37	A/G	0.6667	-0.0028	0.0019	0.13	686939
rs11775320	8:96306959	2	C8orf37	A/G	0.94077	0.0058	0.0038	0.13	680517
rs7837313	8:117715144	0	RAD21	T/C	0.9123	-0.0054	0.0035	0.13	684502
rs2921725	8:117943782	0	RAD21	T/C	0.4682	-0.0027	0.0018	0.13	658601
rs6469668	8:118022485	0	RAD21	A/G	0.6242	0.0027	0.0018	0.13	687683
rs2062947	8:118078696	0	RAD21	A/G	0.1991	-0.0033	0.0022	0.13	692547
rs13297774	9:87176157	0	NTRK2	A/G	0.01222	0.0114	0.0075	0.13	646181
rs11140778	9:87447158	0	NTRK2	A/T	0.7882	-0.0033	0.0022	0.13	668550
rs10739472	9:119511492	9	TRIM32	T/C	0.3891	0.0027	0.0018	0.13	690404
rs4489420	9:139418260	0	INPP5E	A/G	0.5322	0.0028	0.0019	0.13	603499
rs3750382	9:140435087	0	EHMT1	A/G	0.02713	-0.0069	0.0045	0.13	522792
rs11137172	9:140561630	14	EHMT1	A/G	0.1637	0.0036	0.0023	0.13	692087
rs2501557	9:140569260	0	EHMT1	T/C	0.1641	0.0034	0.0023	0.13	689449
rs11817717	10:112132771	0	SMC3	A/G	0.9786	0.011	0.0073	0.13	668611
rs11195125	10:112178263	1	SMC3	T/C	0.08518	-0.0052	0.0034	0.13	679051
rs7918332	10:112323154	0	SMC3	A/G	0.06858	-0.0054	0.0035	0.13	684899
rs1417638	10:112510100	8	BBIP1/SMC	T/C	0.4108	0.0027	0.0018	0.13	687348
rs7936126	11:7854152	0	TUB	T/C	0.01941	-0.0107	0.007	0.13	647224
rs17223613	11:7904766	1	TUB	T/C	0.5841	-0.0026	0.0017	0.13	692480
rs4512892	11:8112140	0	TUB	T/C	0.04964	0.0059	0.0039	0.13	666464
rs6591216	11:66171621	0	BBS1	T/G	0.3848	-0.0027	0.0018	0.13	680794
rs11628387	14:89409120	0	TTC8	T/C	0.8251	0.0035	0.0023	0.13	673787
rs824181	15:24027493	0	MAGEL2/MKRN3/NDN	A/G	0.7867	-0.0032	0.0021	0.13	692044
rs11634496	15:25139203	0	SNURF	A/C	0.2772	-0.003	0.002	0.13	661399
rs12441340	15:25323964	11	SNURF	T/G	0.5581	-0.0026	0.0017	0.13	691139
rs2714773	15:25436151	9	SNURF/UBE3A	A/G	0.92452	-0.005	0.0033	0.13	691598
rs8023440	15:25750301	0	UBE3A	T/C	0.1726	0.0035	0.0024	0.13	686319
rs2526562	15:25810450	2	UBE3A	A/G	0.669	0.0028	0.0018	0.13	691315
rs12594938	15:73071282	0	BBS4	A/G	0.1318	-0.0039	0.0026	0.13	691497
rs12592987	15:73127975	0	BBS4	T/C	0.03701	0.0075	0.0049	0.13	676038
rs6497013	15:93544053	13	CHD2	A/G	0.6152	0.0027	0.0018	0.13	692425
rs17649409	15:93669646	0	CHD2	T/C	0.801	-0.0034	0.0023	0.13	659013
rs12438765	15:93688474	0	CHD2	T/G	0.90762	0.0047	0.0031	0.13	641600
rs7201872	16:56317345	1	BBS2	T/C	0.0266	-0.0079	0.0052	0.13	690604
rs11657678	17:17424303	1	RAI1	T/C	0.0556	-0.0057	0.0038	0.13	687822
rs3744093	17:56492800	7	MKS1	T/C	0.6117	0.0027	0.0018	0.13	692596
rs2526370	17:56487636	0	MKS1	C/G	0.4066	-0.0027	0.0018	0.13	686611
rs1555324	20:5303028	2	PROKR2	C/G	0.173	0.0035	0.0023	0.13	689022
rs6053384	20:5406093	2	PROKR2	A/G	0.6832	-0.0028	0.0019	0.13	680795
rs3787303	20:10208748	1	MKKS	A/G	0.8398	-0.0036	0.0024	0.13	691678
rs363040	20:10221467	0	MKKS	T/G	0.2404	0.0032	0.0021	0.13	672213
rs11087010	20:10329195	4	MKKS	A/G	0.2019	-0.0032	0.0021	0.13	690349
rs17563060	22:38542515	0	SOX10	T/C	0.9389	0.0056	0.0037	0.13	689437
rs1033612	22:41558365	0	EP300	C/G	0.97743	-0.0097	0.0063	0.13	657248
rs3006925	1:243609927	0	SDCCAG8	T/C	0.2224	0.0031	0.0021	0.14	691347
rs10927025	1:243639218	0	SDCCAG8	T/C	0.603	-0.0026	0.0018	0.14	687051
rs9309356	2:63943016	18	WDPCP	A/C	0.7748	-0.0029	0.0019	0.14	793963
rs10164482	2:170578701	0	BBS5	A/G	0.6122	0.0028	0.0019	0.14	540943
rs11923189	3:71670444	2	PROK2	C/G	0.92201	-0.0047	0.0032	0.14	689337
rs13104979	4:122952671	8	BBS7	T/C	0.4103	0.0026	0.0017	0.14	692201
rs10079480	5:42385855	0	GHR	A/G	0.4434	0.0026	0.0018	0.14	676552
rs9403695	6:100810976	0	SIM1	A/C	0.09711	0.0044	0.003	0.14	685907
rs13240939	7:33339742	0	BBS9	A/G	0.97275	-0.0077	0.0052	0.14	510128
rs10253978	7:33554672	0	BBS9	A/G	0.91423	-0.0045	0.0031	0.14	675422
rs17170309	7:33636483	0	BBS9	C/G	0.93545	-0.0054	0.0036	0.14	690906
rs7015888	8:96369119	1	C8orf37	A/G	0.98106	-0.0106	0.0071	0.14	654045
rs13263759	8:100252754	0	VPS13B	T/C	0.1473	0.0037	0.0025	0.14	673899
rs1446535	8:117945597	0	RAD21	A/G	0.2271	-0.0031	0.0021	0.14	680171
rs614886	9:87682475	10	NTRK2	A/C	0.2969	-0.0028	0.0019	0.14	692142
rs10983370	9:119597187	3	TRIM32	A/G	0.2479	-0.003	0.002	0.14	685280
rs1998898	9:119646682	3	TRIM32	T/G	0.7175	0.0029	0.0019	0.14	687506
rs3124607	9:139414839	2	INPP5E	A/G	0.3153	-0.0028	0.0019	0.14	656967
rs11195131	10:112191320	2	SMC3	T/C	0.04362	-0.0066	0.0045	0.14	692140
rs10885088	10:112874207	2	BBIP1	A/G	0.8431	0.0035	0.0024	0.14	691904
rs2272382	11:8111540	0	TUB	T/C	0.3199	0.0028	0.0019	0.14	667812
rs1552736	11:27763277	1	BDNF	A/G	0.4019	-0.0026	0.0018	0.14	689437
rs2131060	11:27773337	1	BDNF	A/C	0.1092	0.0041	0.0028	0.14	679903
rs7311091	12:49383207	0	KMT2D	T/C	0.07554	0.0052	0.0035	0.14	668410
rs17042107	12:76600231	5	BBS10	T/C	0.93627	0.0053	0.0036	0.14	691636
rs1517727	12:76656917	18	BBS10	T/C	0.1524	-0.0036	0.0024	0.14	692282
rs6576388	15:25089509	9	NPAP1/SNURF	A/G	0.1065	-0.0039	0.0026	0.14	788032
rs7166557	15:25835782	0	UBE3A	C/G	0.8729	0.0039	0.0026	0.14	685974
rs8025088	15:72784260	11	BBS4	T/C	0.96767	-0.0073	0.0049	0.14	691170
rs7496621	15:72893374	0	BBS4	A/T	0.05583	-0.0059	0.004	0.14	688880
rs4411466	15:93316748	1	CHD2	T/C	0.91768	0.0047	0.0032	0.14	688512
rs13338087	16:4104512	0	CREBBP	T/G	0.3835	0.0026	0.0018	0.14	670700
rs12931589	16:28979297	2	SH2B1	T/G	0.3317	-0.0026	0.0018	0.14	785632
rs450079	16:56587725	0	BBS2	A/T	0.3138	0.0028	0.0019	0.14	669855
rs9944423	17:17484934	22	RAI1	A/G	0.94001	0.0051	0.0034	0.14	782137
rs8068641	17:17480187	0	RAI1	A/G	0.9064	0.0045	0.003	0.14	686147
rs9896880	17:17535911	3	RAI1	A/G	0.08261	-0.0048	0.0032	0.14	690359
rs7225148	17:56293960	0	MKS1	T/C	0.6955	0.0027	0.0019	0.14	691999
rs2038410	20:5249302	0	PROKR2	T/C	0.4367	-0.0025	0.0017	0.14	691092
rs6133208	20:5414408	0	PROKR2	A/C	0.05227	-0.0056	0.0038	0.14	752138
rs12625291	20:10307676	3	MKKS	C/G	0.1187	0.0039	0.0027	0.14	689728
rs12106093	20:10524897	0	MKKS	A/G	0.05952	0.0055	0.0038	0.14	687898
rs3730168	20:57478939	0	GNAS	A/G	0.3211	0.0028	0.0019	0.14	691926
rs10485828	20:57600655	0	GNAS	C/G	0.1766	-0.0034	0.0023	0.14	685833
rs738519	22:37122351	2	IFT27	T/C	0.1171	-0.0039	0.0027	0.14	690637
rs3026645	22:38375839	0	SOX10	C/G	0.94148	0.0057	0.0038	0.14	676031
rs10927026	1:243647497	0	SDCCAG8	A/G	0.93551	0.0057	0.004	0.15	605826
rs11682913	2:27473649	12	IFT172	A/G	0.2201	0.0028	0.0019	0.15	793855
rs17617459	2:63660902	0	WDPCP	T/C	0.06554	0.005	0.0035	0.15	675240
rs17562423	2:64200119	0	WDPCP	T/C	0.8645	-0.0036	0.0025	0.15	691857
rs7566205	2:170575878	8	BBS5	T/C	0.8153	-0.0032	0.0022	0.15	690146
rs704275	3:71708412	0	PROK2	A/G	0.7849	-0.0031	0.0021	0.15	673165
rs4460016	4:122555682	1	BBS7	A/C	0.01988	0.0087	0.006	0.15	670114
rs4869487	5:36692112	1	NIPBL	T/C	0.1898	-0.0032	0.0023	0.15	666069
rs158790	5:36837911	0	NIPBL	T/C	0.6147	0.0026	0.0018	0.15	690724
rs1509461	5:42407860	7	GHR	T/C	0.562	0.0023	0.0016	0.15	794274
rs9475887	6:57233380	2	RAB23	C/G	0.02181	0.0082	0.0057	0.15	657891
rs2932003	8:38141766	0	FGFR1	A/G	0.02456	0.0087	0.0061	0.15	595014
rs7845393	8:38359468	0	FGFR1	A/C	0.1758	0.0034	0.0023	0.15	691179
rs12543022	8:96414012	0	C8orf37	A/C	0.91259	-0.0044	0.0031	0.15	680205
rs6469660	8:117797719	5	RAD21	T/G	0.2324	-0.003	0.0021	0.15	692246
rs1358859	9:119350228	3	TRIM32	T/C	0.8579	-0.0036	0.0025	0.15	690368
rs10983311	9:119470373	1	TRIM32	A/T	0.2154	-0.003	0.0021	0.15	689257
rs763498	10:112171392	2	SMC3	A/G	0.07291	-0.0051	0.0036	0.15	684266
rs4918625	10:112867219	0	BBIP1	T/C	0.5583	-0.0026	0.0018	0.15	680291
rs11041732	11:8093801	0	TUB	A/G	0.101	-0.0041	0.0029	0.15	671873
rs7940668	11:8196134	14	TUB	T/G	0.6822	-0.0027	0.0019	0.15	688741
rs12826452	12:76573858	8	BBS10	T/C	0.149	-0.0035	0.0024	0.15	692249
rs12427209	12:76839913	0	BBS10	T/C	0.02859	0.0074	0.0051	0.15	673421
rs17117614	15:24103805	2	NDN	A/G	0.7578	0.0029	0.002	0.15	681211
rs4243769	15:25140684	0	SNURF	A/G	0.6428	0.0027	0.0019	0.15	657087
rs11634683	15:72893450	0	BBS4	T/G	0.04367	0.0062	0.0043	0.15	654552
rs7181825	15:93339357	0	CHD2	T/C	0.02596	0.0075	0.0052	0.15	678653
rs129986	16:3804241	0	CREBBP	T/C	0.98556	0.0082	0.0056	0.15	628842
rs2298846	16:56701315	0	BBS2	A/G	0.96311	-0.0068	0.0047	0.15	671681
rs4783952	16:56719157	0	BBS2	T/C	0.4207	0.0026	0.0018	0.15	683539
rs2333091	17:56170968	0	MKS1	T/C	0.8825	0.0041	0.0029	0.15	682126
rs362616	20:10311759	0	MKKS	A/G	0.8251	-0.0033	0.0023	0.15	691773
rs6108491	20:10324253	10	MKKS	T/G	0.5554	0.0025	0.0017	0.15	692561
rs4821529	22:37196448	0	IFT27	T/C	0.0853	-0.0047	0.0032	0.15	673956
rs762920	22:37212536	1	IFT27	A/C	0.09185	-0.0044	0.003	0.15	689113
rs5756390	22:37296129	3	IFT27	A/G	0.2536	0.0029	0.002	0.15	689773
rs10926975	1:243397782	0	SDCCAG8	T/C	0.2578	-0.0028	0.002	0.16	690999
rs12239876	1:243546954	10	SDCCAG8	A/C	0.90049	0.0041	0.0029	0.16	691856
rs780090	2:27718474	0	IFT172	T/C	0.08653	-0.0042	0.003	0.16	790063
rs6546037	2:64116535	1	WDPCP	A/G	0.02578	0.0083	0.006	0.16	644466
rs4359637	2:64008672	23	WDPCP	C/G	0.7778	-0.0029	0.0021	0.16	691526
rs7653640	3:45832958	2	LZTFL1	T/C	0.8362	0.0032	0.0023	0.16	741859
rs11916880	3:45888757	0	LZTFL1	A/C	0.06542	0.0049	0.0035	0.16	691806
rs7623476	3:46068843	15	LZTFL1	A/G	0.7902	-0.0029	0.0021	0.16	692360
rs4677055	3:71894075	4	PROK2	A/G	0.1066	0.0039	0.0028	0.16	691037
rs17009077	3:71941154	0	PROK2	A/G	0.7464	0.0028	0.002	0.16	679913
rs4077973	3:71997013	0	PROK2	T/C	0.1877	-0.0031	0.0022	0.16	687463
rs10511162	3:97370937	0	ARL6	C/G	0.1038	0.0041	0.0029	0.16	674936
rs7649384	3:97400512	0	ARL6	A/G	0.03186	0.0066	0.0046	0.16	784285
rs3806613	3:97486862	2	ARL6	C/G	0.98521	0.0102	0.0072	0.16	651342
rs11735972	4:122552373	1	BBS7	T/C	0.8414	0.0033	0.0024	0.16	690820
rs2175679	4:123523625	8	BBS12	A/C	0.338	0.0026	0.0018	0.16	690502
rs2034461	4:123784295	6	BBS12	A/G	0.1694	-0.003	0.0022	0.16	794465
rs4574536	5:132384689	15	AFF4	T/C	0.7634	0.0027	0.0019	0.16	795328
rs2324637	6:84829099	7	MRAP2	T/C	0.05034	0.0057	0.004	0.16	689345
rs2841308	6:100755027	10	SIM1	T/C	0.4343	0.0024	0.0017	0.16	691896
rs2392183	7:33030915	0	BBS9	C/G	0.07916	-0.0053	0.0038	0.16	657949
rs10281469	7:33144273	15	BBS9	T/G	0.495	-0.0024	0.0017	0.16	692143
rs10951388	7:33461577	2	BBS9	T/C	0.2984	-0.0027	0.0019	0.16	690006
rs2700695	7:33607662	0	BBS9	T/C	0.8104	-0.0031	0.0022	0.16	679353
rs7015650	8:96196821	3	C8orf37	A/T	0.7836	-0.003	0.0021	0.16	687040
rs10504943	8:96415683	1	C8orf37	A/G	0.1681	0.0032	0.0023	0.16	688643
rs4545066	8:96462577	0	C8orf37	A/G	0.88	0.0038	0.0027	0.16	686208
rs1439050	9:87288193	0	NTRK2	T/G	0.3224	-0.0026	0.0018	0.16	691756
rs11140751	9:87366089	0	NTRK2	A/C	0.98392	0.0094	0.0067	0.16	649349
rs11140784	9:87459423	0	NTRK2	A/G	0.97848	-0.009	0.0065	0.16	666098
rs3780635	9:87507275	12	NTRK2	A/G	0.93896	-0.0048	0.0034	0.16	792607
rs10739468	9:119333606	18	TRIM32	A/G	0.08594	0.0043	0.003	0.16	795117
rs1441743	9:119493226	8	TRIM32	A/T	0.613	-0.0025	0.0018	0.16	691672
rs12684483	9:139351737	0	INPP5E	A/G	0.03648	-0.0072	0.005	0.16	529824
rs10780190	9:140692372	2	EHMT1	T/C	0.06069	0.0054	0.0039	0.16	613588
rs12254016	10:112542865	0	BBIP1/SMC	A/G	0.4975	-0.0025	0.0018	0.16	678439
rs12277533	11:7903341	4	TUB	C/G	0.2786	-0.0027	0.0019	0.16	687425
rs11041644	11:7910740	0	TUB	A/G	0.8044	0.0029	0.0021	0.16	783807
rs7967327	12:76696901	4	BBS10	A/C	0.3132	0.0026	0.0018	0.16	692447
rs11107511	12:76699961	8	BBS10	T/G	0.5871	-0.0024	0.0017	0.16	691992
rs17118628	15:23697376	4	MAGEL2/MKRN3	T/C	0.90681	-0.0043	0.0031	0.16	686968
rs8025564	15:23975482	2	MAGEL2/MKRN3/NDN	T/C	0.95405	0.0063	0.0045	0.16	568250
rs7171320	15:25064483	1	NPAP1/SNURF	T/C	0.5526	0.0025	0.0018	0.16	671543
rs12909900	15:25126013	1	NPAP1/SNURF	T/C	0.3516	-0.0026	0.0018	0.16	660952
rs2158442	16:3686163	0	CREBBP	A/C	0.98468	0.0107	0.0076	0.16	626050
rs887245	16:4061031	5	CREBBP	C/G	0.4495	0.0024	0.0018	0.16	664380
rs4784655	16:56364030	0	BBS2	C/G	0.3263	0.0026	0.0019	0.16	687905
rs4074643	17:17619859	3	RAI1	T/C	0.3566	-0.0026	0.0018	0.16	689333
rs7209595	17:17632919	0	RAI1	C/G	0.4749	-0.0024	0.0017	0.16	683872
rs6053331	20:5327694	3	PROKR2	T/G	0.3533	0.0026	0.0018	0.16	686332
rs6100233	20:57383686	0	GNAS	T/C	0.02859	-0.0076	0.0054	0.16	678926
rs4390848	22:37135305	4	IFT27	A/G	0.8276	0.0032	0.0023	0.16	688734
rs7286768	22:37323814	0	IFT27	T/C	0.03888	0.0064	0.0046	0.16	623799
rs8136107	22:37367308	0	IFT27	A/G	0.09127	0.0044	0.0031	0.16	673985
rs12043646	1:243281992	8	SDCCAG8	A/G	0.1337	-0.0036	0.0026	0.17	690168
rs10754798	1:243309958	7	SDCCAG8	A/G	0.1304	-0.0035	0.0026	0.17	691978
rs17474533	2:63397978	3	WDPCP	T/G	0.02005	-0.0092	0.0067	0.17	669819
rs13004408	2:63254056	0	WDPCP	A/C	0.95843	0.0059	0.0043	0.17	672784
rs1878506	2:63632258	0	WDPCP	T/C	0.03666	-0.0066	0.0048	0.17	684793
rs4547503	2:170299299	4	BBS5	A/G	0.94346	-0.0051	0.0038	0.17	684427
rs12612343	2:170306828	0	BBS5	A/G	0.97825	0.0075	0.0054	0.17	671396
rs1488369	3:45885360	2	LZTFL1	T/C	0.5643	0.0024	0.0017	0.17	689239
rs6549415	3:71922551	0	PROK2	A/G	0.1396	0.0035	0.0025	0.17	680356
rs1552069	4:122625935	0	BBS7	A/T	0.1294	-0.0036	0.0026	0.17	685822
rs13114230	4:122971505	5	BBS7	A/C	0.6023	-0.0024	0.0018	0.17	692303
rs7694252	4:123561436	0	BBS12	A/G	0.6848	-0.0026	0.0019	0.17	679711
rs398418	4:123626249	1	BBS12	T/C	0.03543	-0.0068	0.0049	0.17	596753
rs292174	5:36832141	4	NIPBL	A/G	0.2964	-0.0026	0.0019	0.17	691008
rs803136	5:132138324	0	AFF4	T/C	0.8581	-0.0036	0.0026	0.17	684850
rs2147860	6:84666092	0	MRAP2	T/G	0.02947	0.0074	0.0054	0.17	632526
rs9449777	6:84799231	14	MRAP2	T/G	0.06852	0.0047	0.0034	0.17	690174
rs12207783	6:84924544	0	MRAP2	A/G	0.01047	-0.0082	0.006	0.17	612653
rs17791425	6:84970341	0	MRAP2	A/G	0.06075	-0.0057	0.0041	0.17	654199
rs10958731	8:38423868	0	FGFR1	T/G	0.09752	-0.0041	0.003	0.17	692339
rs10958801	8:38523882	5	FGFR1	A/G	0.5709	-0.0023	0.0016	0.17	795583
rs3019294	8:99838531	3	VPS13B	T/C	0.06917	0.0045	0.0033	0.17	686037
rs3020139	8:117900084	27	RAD21	A/C	0.02076	0.0088	0.0064	0.17	681550
rs7856942	9:87097311	0	NTRK2	A/G	0.05747	-0.0053	0.0038	0.17	671749
rs1627784	9:87428866	5	NTRK2	T/C	0.7066	0.0026	0.0019	0.17	691013
rs4486281	9:87455347	0	NTRK2	A/G	0.7047	-0.0027	0.002	0.17	684590
rs6559836	9:87533389	0	NTRK2	A/G	0.7965	-0.0031	0.0022	0.17	679843
rs12348867	9:87739612	24	NTRK2	A/G	0.04473	0.0055	0.004	0.17	792917
rs4837838	9:119526538	1	TRIM32	T/C	0.1061	0.0039	0.0028	0.17	692573
rs3812547	9:139252495	0	INPP5E	A/G	0.6698	0.0026	0.0019	0.17	621463
rs7046156	9:139472614	5	INPP5E	A/G	0.03806	-0.0063	0.0045	0.17	669043
rs11195152	10:112242851	1	SMC3	A/C	0.8365	-0.0031	0.0023	0.17	692180
rs7906194	10:112558236	4	BBIP1/SMC	A/G	0.1058	0.0039	0.0029	0.17	690653
rs10769848	11:7926432	3	TUB	T/C	0.1831	-0.003	0.0022	0.17	690956
rs1397597	11:7953714	4	TUB	C/G	0.93165	0.0047	0.0035	0.17	692613
[truncated: 2,944 more rows]
