# Supplementary material for: A Candidate-Gene Approach Identifies Novel Associations Between Common Variants in/Near Syndromic Obesity Genes and BMI in Pediatric and Adult European Populations
Source: Oxford University Press journal article supplement (doi:10.2337/db18-0986), 2019-01-28
Supplement: db180986supplementarydata5.xlsx [file db180986supplementarydata5.xlsx]

## Sheet: allVEGAS2_results
Supplementary Table 4. All gene-based analyses between syndromic obesity genes and BMI using VEGAS2. Significant associations (P<9.26×10-4) are highlighted in grey.
Gene	Chr	nSNPs	nSims	Start	Stop	Test	P	Top SNP	Top SNP P value
BDNF	11	101	1000000	27626441	27793605	13021.2	1e-06	rs6265	1e-86
KMT2D	12	36	1000000	49362757	49499107	739.077	1e-06	rs7975791	1.1e-09
BBS4	15	59	1000000	72928519	73080817	2154.75	1e-06	rs8033073	6.3e-20
BBS2	16	104	1000000	56468258	56604008	957.151	1e-06	rs12448738	2.8e-11
CREBBP	16	63	1000000	3725055	3980121	381.886	1e-06	rs3794701	1.8e-13
KCTD13	16	28	1000000	29867656	29987553	2826	1e-06	rs11649612	2e-37
SH2B1	16	38	1000000	28825077	28935534	7752.81	1e-06	rs7498665	5.6e-60
SDCCAG8	1	190	1000000	243369306	243713393	1883.17	1e-06	rs946824	1.1e-15
WDPCP	2	371	1000000	63298534	63865867	6163.24	1e-06	rs12478556	4.5e-09
SIM1	6	161	1000000	100786749	100961551	2063.58	1e-06	rs240764	6.2e-11
NTRK2	9	486	1000000	87233372	87691985	3943.59	1e-06	rs1187352	6e-11
EP300	22	101	1000000	41438613	41626081	1572.11	2e-06	rs139477	1.6e-08
SOX10	22	28	1000000	38318318	38430539	456.212	7e-06	rs3026659	3.4e-08
RAB23	6	71	1000000	57001790	57137112	464.321	1.7e-05	rs1411578	1.8e-06
GNAS	20	119	1000000	57364794	57536250	498.926	5.4e-05	rs6026567	4.4e-07
LZTFL1	3	131	1000000	45814809	46007216	653.273	7.6e-05	rs17765088	5.7e-07
BBS1	11	59	1000000	66228118	66351084	576.207	0.000127	rs618838	1.5e-06
PROKR2	20	174	1000000	5232685	5345015	873.901	0.00019	rs6116750	1.9e-05
CHD2	15	180	1000000	93393550	93621237	871.42	0.000191	rs1881837	2.5e-05
IFT27	22	103	1000000	37104245	37222177	463.499	0.000263	rs3827351	4.2e-06
RAI1	17	109	1000000	17534786	17764765	713.987	0.000316	rs752579	1.6e-06
GHR	5	267	1000000	42373876	42771980	1428.25	0.000404	rs11950813	1.9e-05
NDN	15	65	100000	23880553	23982450	268.137	0.00149998	rs11161347	1.1e-06
BBS7	4	84	100000	122695483	122841652	483.075	0.00158998	rs2071486	0.00084
FGFR1	8	61	100000	38218655	38376352	268.69	0.00402996	rs881301	2.4e-08
NIPBL	5	98	100000	36826860	37115921	420.73	0.00477995	rs2123010	7.1e-05
IFT172	2	55	100000	27617239	27762678	327.868	0.00535995	rs1260326	3.9e-10
EHMT1	9	146	100000	140463443	140780578	556.927	0.00604994	rs11792069	6.5e-10
BBS9	7	533	10000	33119151	33695680	1355.35	0.009999	rs10486527	4e-05
TUB	11	145	10000	8010179	8177654	309.329	0.0153985	rs1881235	1.6e-05
BBS12	4	93	10000	123603856	123716098	280.194	0.020298	rs309415	0.0046
TTC8	14	123	10000	89240496	89394340	306.258	0.0421958	rs7153778	9.9e-05
BBIP1	10	82	10000	112608487	112729124	185.959	0.0527947	rs11195360	0.001
AFF4	5	106	10000	132161070	132349354	242.057	0.0638936	rs11739194	0.01
BBS5	2	111	1000	170286005	170413165	220.892	0.0689311	rs7600451	0.00068
MKKS	20	131	1000	10335427	10464887	266.602	0.0819181	rs2206660	0.01
TRIM32	9	121	1000	119399580	119513579	233.485	0.0879121	rs10983313	0.0022
MRAP2	6	91	1000	84693419	84850605	162.811	0.100899	rs13194787	0.0048
MAGEL2	15	83	1000	23838695	23942993	144.409	0.110889	rs699330	1.5e-06
SNURF	15	89	1000	25150069	25273729	143.064	0.113886	rs17114996	0.00044
BBS10	12	58	1000	76688265	76792222	108.328	0.115884	rs12424648	0.00086
INPP5E	9	92	1000	139273066	139384256	143.091	0.172827	rs9548	0.018
SMC3	10	124	1000	112277448	112414392	150.315	0.280719	rs4917576	0.0004
RAD21	8	147	1000	117808172	117937105	180.244	0.284715	rs6469661	0.019
ALMS1	2	241	1000	73562885	73887046	259.377	0.304695	rs2015477	0.014
ARL6	3	59	1000	97433364	97570086	65.6793	0.315684	rs4857288	0.069
CEP290	12	127	1000	88392789	88585993	120.47	0.395604	rs7980912	0.021
VPS13B	8	459	1000	99975493	100939814	350.111	0.504496	rs10098852	0.0019
PROK2	3	71	1000	71770805	71884357	63.9575	0.521479	rs6786206	0.018
MKS1	17	81	1000	56232796	56346966	67.6314	0.538462	rs8178289	0.023
NPAP1	15	96	1000	24870540	24978593	64.8544	0.617383	rs9635419	0.12
MKRN3	15	76	1000	23760453	23863166	54.2007	0.631369	rs7495396	0.031
C8orf37	8	151	1000	96207140	96331462	115.309	0.681319	rs16917426	0.0097
UBE3A	15	131	1000	25532395	25734175	38.689	0.93007	rs10519485	0.048
