# Supplementary material for: A Candidate-Gene Approach Identifies Novel Associations Between Common Variants in/Near Syndromic Obesity Genes and BMI in Pediatric and Adult European Populations
Source: Oxford University Press journal article supplement (doi:10.2337/db18-0986), 2019-01-28
Supplement: db180986supplementarydata6.xlsx [file db180986supplementarydata6.xlsx]

## Sheet: 5A
Supplementary Table 5A. Summary statistics of all SNPs tested in single-marker analysis using a ±50kb gene definition. Significant associations (P<6.90×10-6) are highlighted in grey.
SNP	Chr:position	Gene	Alleles	EAF	β	SE	P	N
rs6265	11:27679916	BDNF	T/C	0.1951	-0.0412	0.0021	1e-86	795458
rs2049045	11:27694241	BDNF	C/G	0.1842	-0.0405	0.0021	1.9e-83	793584
rs11030104	11:27684517	BDNF	A/G	0.7891	0.0393	0.002	2e-83	794765
rs16917237	11:27702383	BDNF	T/G	0.2105	-0.0393	0.002	2.7e-83	787789
rs7103411	11:27700125	BDNF	T/C	0.7841	0.0385	0.002	1.6e-82	795623
rs2030323	11:27728539	BDNF	A/C	0.2149	-0.0383	0.002	8.4e-82	795269
rs10501087	11:27670108	BDNF	T/C	0.791	0.0384	0.002	2.9e-79	795220
rs925947	11:27667367	BDNF	T/G	0.209	-0.0385	0.0021	1.1e-78	774560
rs4074134	11:27647285	BDNF	T/C	0.2089	-0.0377	0.002	5.8e-78	795578
rs4923457	11:27648580	BDNF	A/T	0.7913	0.0377	0.002	7.4e-78	795171
rs4923460	11:27656789	BDNF	T/G	0.2088	-0.0376	0.002	1.9e-77	794867
rs4923461	11:27656910	BDNF	A/G	0.7912	0.0376	0.002	3.4e-77	795259
rs10767664	11:27725986	BDNF	A/T	0.785	0.0385	0.0021	5.5e-77	731192
rs988748	11:27724745	BDNF	C/G	0.2187	-0.0379	0.0021	1.6e-75	739603
rs1488830	11:27636885	BDNF	T/C	0.7899	0.0373	0.002	5.5e-75	790842
rs879048	11:27638934	BDNF	A/C	0.79	0.0369	0.002	8e-75	795201
rs6484320	11:27703188	BDNF	A/T	0.7849	0.0382	0.0021	2e-72	692257
rs11030084	11:27643725	BDNF	T/C	0.192	-0.0392	0.0022	4.8e-70	692253
rs12419948	11:27666984	BDNF	A/T	0.209	-0.038	0.0022	1.1e-69	692275
rs1013402	11:27712381	BDNF	A/G	0.6829	-0.0295	0.0018	1.3e-63	793174
rs1401635	11:27693991	BDNF	C/G	0.3154	0.0295	0.0018	1.6e-63	788991
rs11030108	11:27695464	BDNF	A/G	0.3153	0.0294	0.0018	3.5e-63	794680
rs1519480	11:27675712	BDNF	T/C	0.6813	-0.0292	0.0018	1.4e-62	793242
rs10767658	11:27672252	BDNF	C/G	0.3085	0.0293	0.0018	1.6e-62	781752
rs11030119	11:27728102	BDNF	A/G	0.3014	0.0295	0.0018	1.8e-62	793224
rs7127507	11:27714884	BDNF	T/C	0.6749	-0.0287	0.0017	3.1e-62	793067
rs962369	11:27734420	BDNF	T/C	0.6988	-0.0296	0.0018	7.6e-62	792827
rs925946	11:27667202	BDNF	T/G	0.3088	0.029	0.0018	2.2e-61	795513
rs7124442	11:27677041	BDNF	T/C	0.6832	-0.0286	0.0017	4.6e-61	793435
rs7498665	16:28883241	SH2B1	A/G	0.5962	-0.0271	0.0017	5.6e-60	790299
rs3888190	16:28889486	SH2B1	A/C	0.4038	0.0271	0.0017	9.2e-60	794486
rs11030121	11:27736207	BDNF	T/C	0.3103	0.0287	0.0018	1.2e-59	790200
rs4788101	16:28867804	SH2B1	T/C	0.4038	0.027	0.0017	1.4e-59	795541
rs8055982	16:28881202	SH2B1	A/C	0.5962	-0.027	0.0017	1.6e-59	795565
rs4788102	16:28873398	SH2B1	A/G	0.4039	0.027	0.0017	2.7e-59	795549
rs4788099	16:28855727	SH2B1	A/G	0.5963	-0.0269	0.0017	4.8e-59	795572
rs7187776	16:28857645	SH2B1	A/G	0.5927	-0.0265	0.0016	1.4e-58	792563
rs8049439	16:28837515	SH2B1	T/C	0.592	-0.0265	0.0016	1.5e-58	795590
rs8061590	16:28895130	SH2B1	A/G	0.5969	-0.0268	0.0017	1.8e-58	793970
rs7359397	16:28885659	SH2B1	T/C	0.4021	0.0267	0.0017	4.9e-58	795625
rs2008514	16:28825605	SH2B1	A/G	0.407	0.0268	0.0017	9.1e-58	787726
rs12325113	16:28848668	SH2B1	T/C	0.5975	-0.0265	0.0017	1.7e-57	795568
rs12443881	16:28841777	SH2B1	T/C	0.4023	0.0265	0.0017	1.9e-57	795596
rs8055138	16:28891465	SH2B1	T/C	0.4038	0.0269	0.0017	7.2e-57	737455
rs10835211	11:27701365	BDNF	A/G	0.261	0.0289	0.0019	2e-54	795539
rs11030107	11:27694835	BDNF	A/G	0.7422	-0.0289	0.0019	2.3e-54	794663
rs11030102	11:27681596	BDNF	C/G	0.7422	-0.0288	0.0019	3.2e-54	794512
rs10734394	11:27628412	BDNF	A/G	0.7588	0.0292	0.0019	1.8e-52	792798
rs17309874	11:27667236	BDNF	A/G	0.2565	0.0283	0.0019	5.4e-52	792413
rs9931989	16:28906084	SH2B1	C/G	0.641	-0.0257	0.0017	3.9e-50	793807
rs4788100	16:28864673	SH2B1	T/C	0.5971	-0.026	0.0018	1.7e-49	692604
rs7205323	16:28865892	SH2B1	T/C	0.4031	0.0259	0.0018	2e-49	692478
rs8062405	16:28837906	SH2B1	A/G	0.5961	-0.0257	0.0017	3.8e-49	692503
rs12325278	16:28848818	SH2B1	A/G	0.5963	-0.0258	0.0018	4.3e-49	692435
rs6565259	16:28898793	SH2B1	T/C	0.6297	-0.025	0.0017	2.4e-48	785070
rs7187333	16:28865916	SH2B1	A/G	0.4014	0.0256	0.0018	2.6e-48	692470
rs10742179	11:27650524	BDNF	A/G	0.2677	-0.0269	0.0018	6.1e-48	794964
rs12928404	16:28847246	SH2B1	T/C	0.5865	-0.0254	0.0018	9.1e-48	691290
rs9972768	16:28861734	SH2B1	A/C	0.5963	-0.0266	0.0018	2.5e-47	579697
rs9972693	16:28859802	SH2B1	A/G	0.5963	-0.0267	0.0019	8.8e-47	558456
rs11646653	16:28922149	SH2B1	T/C	0.6606	-0.0249	0.0017	1.4e-46	794902
rs12444171	16:28845251	SH2B1	A/G	0.4036	0.0266	0.0019	1.7e-46	559349
rs7189927	16:28913787	SH2B1	T/C	0.3586	0.0251	0.0017	1.8e-46	757896
rs7116850	11:27645530	BDNF	A/G	0.729	0.0263	0.0018	2.4e-46	795214
rs4451951	16:28836205	SH2B1	T/C	0.5951	-0.0263	0.0019	1.2e-45	556217
rs3924376	16:28925978	SH2B1	T/C	0.3364	0.0246	0.0018	2.1e-44	791296
rs11030086	11:27646157	BDNF	A/T	0.2804	-0.0255	0.0018	2.3e-44	793554
rs17309930	11:27748493	BDNF	A/C	0.2028	0.0281	0.002	6.3e-44	791415
rs12273363	11:27744859	BDNF	T/C	0.7962	-0.0281	0.002	6.9e-44	792066
rs12288512	11:27747671	BDNF	A/G	0.2028	0.0281	0.002	8.6e-44	794179
rs11030075	11:27627296	BDNF	C/G	0.7686	-0.0266	0.0019	4.4e-43	793636
rs7188071	16:28917644	SH2B1	T/C	0.3582	0.0252	0.0019	7.6e-40	558699
rs6416056	11:27646745	BDNF	A/G	0.7285	0.0257	0.0019	1e-39	692308
rs7184597	16:28921809	SH2B1	T/C	0.338	0.0243	0.0019	4.9e-39	679834
rs10499	16:28915527	SH2B1	A/G	0.643	-0.0247	0.0019	8.3e-39	576859
rs11649612	16:29946670	KCTD13	T/C	0.4595	-0.022	0.0017	2e-37	692025
rs4787486	16:29977562	KCTD13	A/T	0.5476	-0.022	0.0017	2.4e-37	691412
rs6565173	16:29974167	KCTD13	A/G	0.4519	0.022	0.0017	3.1e-37	691469
rs12716974	16:29944832	KCTD13	A/G	0.5405	0.022	0.0017	3.4e-37	692535
rs7204797	16:29968015	KCTD13	T/C	0.4524	0.0219	0.0017	3.9e-37	691515
rs4788196	16:29967434	KCTD13	A/G	0.5476	-0.0219	0.0017	6e-37	691522
rs12444978	16:29924422	KCTD13	A/T	0.4618	-0.0218	0.0017	9.6e-37	692475
rs11901	16:29984070	KCTD13	C/G	0.5482	-0.0217	0.0017	1.7e-36	691805
rs4407079	16:29931899	KCTD13	A/G	0.5385	0.0217	0.0017	2.4e-36	692449
rs4318227	16:29984839	KCTD13	C/G	0.5482	-0.0216	0.0017	2.7e-36	692365
rs4609871	16:29932064	KCTD13	T/C	0.5391	0.0217	0.0017	2.7e-36	692522
rs4283241	16:29988349	KCTD13	A/G	0.4522	0.0216	0.0017	3.1e-36	692437
rs11150577	16:29986525	KCTD13	A/G	0.4518	0.0216	0.0017	3.6e-36	692494
rs12716973	16:29937652	KCTD13	A/G	0.5435	0.021	0.0017	3.7e-34	692129
rs12716972	16:29936654	KCTD13	A/G	0.4567	-0.0209	0.0017	1.2e-33	692460
rs12807253	11:27628269	BDNF	A/G	0.09775	-0.0353	0.003	2.2e-32	765699
rs12448482	16:28838073	SH2B1	A/G	0.3395	-0.0197	0.0018	5.2e-29	767054
rs7498491	16:28844068	SH2B1	A/T	0.6565	0.0192	0.0017	1e-28	793260
rs2071342	16:28915433	SH2B1	A/C	0.6489	0.0193	0.0018	2.5e-27	716719
rs4788199	16:29970857	KCTD13	C/G	0.4759	-0.018	0.0017	2.1e-25	684897
rs4548895	16:29923510	KCTD13	A/G	0.6076	0.0183	0.0018	3.9e-24	683393
rs11647753	16:29928115	KCTD13	A/G	0.3817	-0.0178	0.0018	9.6e-24	690444
rs8033073	15:73051093	BBS4	A/G	0.6427	0.0163	0.0018	6.3e-20	691101
rs10459647	15:73035241	BBS4	T/C	0.3561	-0.0163	0.0018	7.2e-20	691064
rs8025333	15:73025121	BBS4	A/G	0.3565	-0.0161	0.0018	1.4e-19	691760
rs9460	15:73044575	BBS4	A/G	0.642	0.0163	0.0018	1.5e-19	690067
rs8024986	15:73024868	BBS4	T/C	0.6397	0.0161	0.0018	1.7e-19	692489
rs2277598	15:73027478	BBS4	T/C	0.3559	-0.0161	0.0018	2.2e-19	692591
rs2304597	15:73052431	BBS4	A/G	0.356	-0.0162	0.0018	2.2e-19	691145
rs8033580	15:72994968	BBS4	A/C	0.6448	0.0161	0.0018	5e-19	690131
rs7167076	15:73028873	BBS4	A/G	0.3566	-0.0159	0.0018	5.3e-19	690862
rs730180	15:73007893	BBS4	A/G	0.7886	0.0176	0.002	5.4e-19	792607
rs7176235	15:72999104	BBS4	A/G	0.3597	-0.0159	0.0018	1.1e-18	689430
rs7178130	15:72978202	BBS4	A/G	0.6379	0.0156	0.0018	6.8e-18	688608
rs11072384	15:73001314	BBS4	T/C	0.2085	-0.0178	0.0021	1.7e-17	691516
rs7176223	15:73077742	BBS4	T/G	0.3493	-0.0156	0.0018	2.8e-17	633050
rs2012253	15:73008123	BBS4	A/G	0.209	-0.0175	0.0022	5.1e-16	636285
rs946824	1:243684019	SDCCAG8	T/C	0.141	0.0206	0.0026	1.1e-15	689849
rs9806742	15:73051219	BBS4	A/G	0.8826	0.0208	0.0026	1.4e-15	692509
rs7523198	1:243702266	SDCCAG8	T/C	0.8571	-0.0203	0.0026	1.6e-15	689821
rs17826791	15:73011994	BBS4	C/G	0.883	0.0207	0.0026	2.2e-15	692047
rs1975327	15:73019391	BBS4	A/G	0.8823	0.0207	0.0026	2.2e-15	692285
rs6704286	1:243678389	SDCCAG8	T/G	0.145	0.0203	0.0026	2.8e-15	690606
rs17753768	15:72995969	BBS4	T/C	0.117	-0.0206	0.0026	4.1e-15	691890
rs17827419	15:73079253	BBS4	A/G	0.1179	-0.0206	0.0026	5.5e-15	689037
rs12372979	15:73015760	BBS4	A/C	0.8752	0.0198	0.0026	1.9e-14	691239
rs3850988	15:72989224	BBS4	A/G	0.2551	-0.0141	0.0019	4.9e-14	791754
rs8026559	15:72976511	BBS4	A/T	0.2712	-0.0144	0.0019	1.1e-13	689794
rs3794701	16:3730578	CREBBP	A/G	0.4771	-0.0128	0.0017	1.8e-13	682455
rs7497429	15:72981631	BBS4	A/T	0.2513	-0.0145	0.002	2.6e-13	689907
rs12917712	16:29882490	KCTD13	T/C	0.3296	0.0134	0.0018	3e-13	692496
rs8033644	15:73010784	BBS4	A/G	0.2496	-0.0144	0.002	4.4e-13	690370
rs17753627	15:72975502	BBS4	A/G	0.8743	0.0185	0.0026	5.5e-13	691173
rs7549780	1:243712455	SDCCAG8	A/C	0.3247	0.0133	0.0018	7.1e-13	689370
rs10519024	15:73065871	BBS4	T/C	0.8827	0.0191	0.0027	7.3e-13	691100
rs10835219	11:27791178	BDNF	A/C	0.639	0.013	0.0019	2.2e-12	664064
rs908867	11:27745764	BDNF	T/C	0.09594	0.0187	0.0027	6.7e-12	794383
rs7939810	11:27633409	BDNF	T/C	0.6377	0.0117	0.0017	7.9e-12	791415
rs4787483	16:29885447	KCTD13	A/G	0.6546	-0.0124	0.0018	1e-11	691316
rs12448738	16:56489343	BBS2	A/C	0.8629	-0.0168	0.0025	2.8e-11	691932
rs7523742	1:243688150	SDCCAG8	A/G	0.0922	0.0206	0.0031	4.1e-11	691627
rs7189122	16:56471410	BBS2	T/C	0.8299	-0.015	0.0023	4.5e-11	692600
rs12444921	16:56503416	BBS2	T/G	0.8682	-0.0166	0.0025	4.7e-11	692218
rs2288055	16:56501806	BBS2	T/C	0.1362	0.0166	0.0025	4.9e-11	692220
rs11344	16:29910518	KCTD13	C/G	0.6443	-0.012	0.0018	5e-11	690444
rs1187352	9:87293457	NTRK2	T/C	0.3482	-0.0119	0.0018	6e-11	688522
rs11640452	16:56525060	BBS2	A/G	0.1725	0.0152	0.0023	6.1e-11	692303
rs240764	6:100953148	SIM1	A/G	0.4692	0.0114	0.0017	6.2e-11	679526
rs11030123	11:27748285	BDNF	A/G	0.09822	0.018	0.0028	6.3e-11	772096
rs7498372	16:29910725	KCTD13	A/G	0.6421	-0.0122	0.0019	6.9e-11	637232
rs8049949	16:56530377	BBS2	A/G	0.8652	-0.0164	0.0025	7.4e-11	692333
rs3228	16:56511245	BBS2	T/G	0.865	-0.0164	0.0025	7.9e-11	691695
rs918784	16:56512769	BBS2	A/G	0.8637	-0.0164	0.0025	8e-11	692277
rs11649379	16:56493573	BBS2	T/C	0.1716	0.0147	0.0023	9.3e-11	691694
rs2288056	16:56519097	BBS2	A/G	0.8651	-0.0163	0.0025	9.9e-11	692328
rs12447395	16:56529340	BBS2	T/C	0.8617	-0.0163	0.0025	1.1e-10	690595
rs2161738	16:56542340	BBS2	C/G	0.8651	-0.0162	0.0025	1.3e-10	689414
rs12374612	6:100955752	SIM1	T/C	0.4739	0.0111	0.0017	1.3e-10	686656
rs1635404	16:3747042	CREBBP	T/G	0.6925	0.0121	0.0019	1.6e-10	691805
rs12447295	16:56542121	BBS2	T/C	0.8286	-0.0145	0.0023	1.8e-10	689412
rs6500550	16:3746241	CREBBP	T/C	0.3005	0.012	0.0019	2.4e-10	684834
rs1187321	9:87283031	NTRK2	A/T	0.8041	0.0137	0.0022	2.5e-10	692346
rs1147194	9:87272731	NTRK2	T/C	0.196	-0.0136	0.0022	3.5e-10	692607
rs1260326	2:27730940	IFT172	T/C	0.4027	-0.0105	0.0017	3.9e-10	784462
rs1147199	9:87275895	NTRK2	A/G	0.1974	-0.0136	0.0022	4.5e-10	684867
rs1211166	9:87285992	NTRK2	A/G	0.8054	0.0135	0.0022	5e-10	691935
rs1187323	9:87283416	NTRK2	A/C	0.8057	0.0135	0.0022	5.3e-10	692237
rs11792069	9:140646121	EHMT1	A/G	0.83	0.0145	0.0024	6.5e-10	644252
rs7184983	16:56554709	BBS2	A/G	0.1323	0.0159	0.0026	6.8e-10	692044
rs2997494	1:243614681	SDCCAG8	A/G	0.08986	0.0198	0.0032	8e-10	680483
rs10927035	1:243703982	SDCCAG8	T/C	0.6393	-0.0111	0.0018	9.9e-10	688211
rs7975791	12:49413486	KMT2D	T/C	0.03601	-0.0264	0.0043	1.1e-09	770139
rs3006927	1:243657399	SDCCAG8	T/C	0.8332	-0.0147	0.0024	1.2e-09	691638
rs1187351	9:87295077	NTRK2	A/C	0.3993	-0.0106	0.0018	2.1e-09	687350
rs1619120	9:87302196	NTRK2	A/G	0.4013	-0.0099	0.0017	2.4e-09	791760
rs12628891	22:38317137	SOX10	T/C	0.3169	-0.0112	0.0019	3e-09	686575
rs726432	9:87247448	NTRK2	T/C	0.585	0.0104	0.0017	3.2e-09	691787
rs11373	16:56545175	BBS2	T/C	0.8289	-0.0144	0.0024	3.4e-09	555283
rs12042959	1:243533273	SDCCAG8	A/G	0.8495	0.0144	0.0024	3.4e-09	685384
rs12478556	2:63341711	WDPCP	A/T	0.4177	0.0103	0.0018	4.5e-09	683709
rs3006928	1:243658030	SDCCAG8	A/G	0.1498	0.0151	0.0026	4.7e-09	684732
rs747973	16:29875241	KCTD13	A/G	0.6949	-0.0113	0.0019	5.6e-09	674448
rs12029086	1:243564722	SDCCAG8	T/G	0.1421	-0.0142	0.0025	6.6e-09	692525
rs1187336	9:87316868	NTRK2	A/T	0.373	-0.0103	0.0018	7e-09	692361
rs1187337	9:87316037	NTRK2	T/C	0.4519	-0.01	0.0017	7e-09	692144
rs4671457	2:63346356	WDPCP	T/C	0.4166	0.0101	0.0018	7.4e-09	684558
rs1659400	9:87325994	NTRK2	A/G	0.4573	-0.0099	0.0017	1e-08	691232
rs12933766	16:29922011	KCTD13	T/C	0.5734	0.0104	0.0018	1.1e-08	625550
rs1659401	9:87324683	NTRK2	T/C	0.5425	0.0098	0.0017	1.1e-08	691214
rs1778931	9:87323775	NTRK2	A/G	0.4573	-0.0098	0.0017	1.1e-08	691239
rs6429425	1:243590990	SDCCAG8	T/G	0.1451	-0.0141	0.0025	1.1e-08	690495
rs2265	9:87331606	NTRK2	T/C	0.5425	0.0098	0.0017	1.3e-08	691089
rs12037698	1:243584345	SDCCAG8	A/G	0.1451	-0.014	0.0025	1.5e-08	678629
rs240766	6:100954036	SIM1	A/G	0.5475	0.0098	0.0017	1.5e-08	686166
rs2162014	2:63345507	WDPCP	A/C	0.4158	0.0099	0.0018	1.5e-08	683144
rs139477	22:41624461	EP300	A/G	0.7197	0.011	0.0019	1.6e-08	678857
rs1857859	6:100894587	SIM1	A/G	0.2701	-0.0103	0.0018	1.7e-08	795389
rs2489162	9:87333742	NTRK2	A/G	0.5424	0.0097	0.0017	1.8e-08	690829
rs1439048	9:87327889	NTRK2	T/G	0.4577	-0.0097	0.0017	1.9e-08	691272
rs1778932	9:87324212	NTRK2	A/G	0.5427	0.0097	0.0017	1.9e-08	691225
rs9373504	6:100941037	SIM1	A/G	0.447	-0.0097	0.0017	1.9e-08	689359
rs780093	2:27742603	IFT172	T/C	0.3941	-0.0093	0.0017	2e-08	794606
rs9322076	6:100952020	SIM1	T/C	0.5531	0.0098	0.0017	2e-08	681399
rs1728918	2:27635463	IFT172	A/G	0.2717	-0.0114	0.002	2.2e-08	572468
rs4820429	22:41538111	EP300	C/G	0.285	-0.0107	0.0019	2.3e-08	691942
rs1129700	16:29918034	KCTD13	T/C	0.4373	-0.0099	0.0018	2.3e-08	677226
rs1187343	9:87308783	NTRK2	A/G	0.6221	0.0099	0.0018	2.3e-08	692591
rs2579369	9:87329587	NTRK2	T/C	0.4583	-0.0096	0.0017	2.3e-08	691159
rs2918626	9:87328983	NTRK2	T/C	0.4662	-0.0091	0.0016	2.3e-08	794721
rs7510675	22:41549297	EP300	A/G	0.2851	-0.0107	0.0019	2.4e-08	691932
rs881301	8:38332318	FGFR1	T/C	0.5818	-0.0097	0.0017	2.4e-08	691753
rs2213595	6:100935819	SIM1	A/G	0.5531	0.0096	0.0017	2.4e-08	690618
rs780094	2:27741237	IFT172	T/C	0.3934	-0.0093	0.0017	2.5e-08	795482
rs1054442	12:49389320	KMT2D	A/C	0.6178	-0.0103	0.0018	2.5e-08	625990
rs240765	6:100953883	SIM1	T/C	0.5424	0.0096	0.0017	2.5e-08	684899
rs6929748	6:100929394	SIM1	T/C	0.4469	-0.0096	0.0017	2.5e-08	690840
rs10927006	1:243557659	SDCCAG8	T/C	0.851	0.0136	0.0024	2.8e-08	683551
rs11644679	16:56490549	BBS2	A/G	0.1681	0.0122	0.0022	2.9e-08	790999
rs3829541	16:3730499	CREBBP	C/G	0.5402	-0.0097	0.0017	2.9e-08	682952
rs10875910	12:49402393	KMT2D	C/G	0.3625	0.01	0.0018	3.1e-08	690113
rs11168850	12:49472965	KMT2D	A/G	0.4446	0.0096	0.0017	3.1e-08	690146
rs2397974	6:100925828	SIM1	T/C	0.5536	0.0095	0.0017	3.1e-08	691048
rs10875912	12:49416944	KMT2D	T/C	0.6355	-0.01	0.0018	3.3e-08	690454
rs2071826	6:100928357	SIM1	A/G	0.5534	0.0095	0.0017	3.3e-08	690746
rs10927010	1:243578812	SDCCAG8	A/G	0.1409	-0.0138	0.0025	3.4e-08	679522
rs12140432	1:243596287	SDCCAG8	A/G	0.1415	-0.0138	0.0025	3.4e-08	679168
rs3026659	22:38396220	SOX10	T/C	0.3649	-0.01	0.0018	3.4e-08	683489
rs139474	22:41619226	EP300	C/G	0.3784	-0.0098	0.0018	3.5e-08	691051
rs7751526	6:100949822	SIM1	A/G	0.4462	-0.0095	0.0017	3.5e-08	687289
rs6580699	12:49478812	KMT2D	T/G	0.5544	-0.0095	0.0017	3.6e-08	692518
rs11614738	12:49424616	KMT2D	A/G	0.3628	0.01	0.0018	3.7e-08	689702
rs10927016	1:243595136	SDCCAG8	T/C	0.1401	-0.0137	0.0025	3.9e-08	690820
rs5758223	22:41489920	EP300	A/G	0.7147	0.0106	0.0019	4e-08	689935
rs9386154	6:100923704	SIM1	C/G	0.5536	0.0094	0.0017	4.3e-08	691125
rs7201929	16:28871966	SH2B1	T/C	0.7566	0.0105	0.0019	4.6e-08	794892
rs6901854	6:100932291	SIM1	T/C	0.5427	0.0094	0.0017	4.7e-08	690970
rs2158962	16:3738027	CREBBP	A/G	0.5353	-0.0095	0.0017	5.6e-08	680673
rs1187356	9:87305257	NTRK2	A/T	0.5734	0.0094	0.0017	5.6e-08	691095
rs1569858	22:41541024	EP300	A/G	0.3784	-0.0097	0.0018	5.9e-08	692122
rs7969091	12:49464449	KMT2D	A/G	0.555	-0.0094	0.0017	6e-08	683642
rs893582	9:87310361	NTRK2	A/G	0.4266	-0.0093	0.0017	6.8e-08	691145
rs139439	22:41606030	EP300	A/C	0.6206	0.0096	0.0018	6.9e-08	692565
rs2038209	22:41594611	EP300	T/C	0.3821	-0.0096	0.0018	6.9e-08	690009
rs139464	22:41614020	EP300	C/G	0.6208	0.0096	0.0018	7e-08	692537
rs2413637	22:41541527	EP300	C/G	0.6221	0.0096	0.0018	7e-08	691972
rs12035042	1:243583899	SDCCAG8	T/G	0.8506	0.0132	0.0025	7e-08	678699
rs139460	22:41611063	EP300	T/C	0.6203	0.0096	0.0018	7.1e-08	692509
rs139452	22:41610172	EP300	C/G	0.3792	-0.0096	0.0018	7.2e-08	692554
rs4822011	22:41550954	EP300	T/C	0.6212	0.0096	0.0018	7.3e-08	692115
rs738631	22:41511176	EP300	A/G	0.6225	0.0096	0.0018	7.3e-08	691775
rs1187341	9:87311715	NTRK2	T/G	0.5736	0.0094	0.0017	7.3e-08	685057
rs20552	22:41551039	EP300	A/T	0.6211	0.0097	0.0018	7.5e-08	690634
rs4820431	22:41549921	EP300	A/C	0.377	-0.0096	0.0018	7.5e-08	691789
rs1847912	6:100880696	SIM1	A/G	0.7567	0.0108	0.002	7.6e-08	690617
rs139432	22:41604557	EP300	A/G	0.3794	-0.0096	0.0018	7.7e-08	692571
rs139455	22:41610406	EP300	C/G	0.6205	0.0096	0.0018	7.7e-08	692616
rs139457	22:41610667	EP300	T/C	0.6253	0.0096	0.0018	7.7e-08	692617
rs10459232	12:49467076	KMT2D	A/C	0.5562	-0.0094	0.0017	7.7e-08	684033
rs7773043	6:100921115	SIM1	A/G	0.5443	0.0092	0.0017	7.7e-08	691960
rs85220	22:41612965	EP300	T/G	0.6205	0.0096	0.0018	7.8e-08	692615
rs4822006	22:41519362	EP300	T/C	0.379	-0.0096	0.0018	7.9e-08	692425
rs139450	22:41609859	EP300	T/C	0.6205	0.0096	0.0018	8.1e-08	692599
rs2076577	22:41568480	EP300	T/C	0.3791	-0.0096	0.0018	8.1e-08	692054
rs1033611	22:41558232	EP300	A/G	0.3817	-0.0096	0.0018	8.2e-08	692079
rs139451	22:41610024	EP300	A/G	0.3799	-0.0096	0.0018	8.2e-08	692599
rs1274726	12:49501398	KMT2D	T/C	0.5904	-0.0096	0.0018	8.2e-08	686163
rs139453	22:41610242	EP300	A/G	0.6205	0.0095	0.0018	8.4e-08	691170
rs139454	22:41610391	EP300	A/G	0.3795	-0.0095	0.0018	8.4e-08	692612
rs5758237	22:41515744	EP300	T/G	0.3799	-0.0096	0.0018	8.4e-08	692051
rs5758238	22:41519308	EP300	A/G	0.6207	0.0095	0.0018	8.4e-08	692455
rs139433	22:41604652	EP300	C/G	0.6205	0.0095	0.0018	8.5e-08	692564
rs2157342	6:100920655	SIM1	A/T	0.5448	0.0092	0.0017	8.8e-08	692565
rs3798497	6:100878858	SIM1	A/G	0.7993	0.0115	0.0022	8.8e-08	690322
rs11687645	2:63562369	WDPCP	A/T	0.5682	-0.0092	0.0017	8.9e-08	691390
rs139475	22:41623996	EP300	T/C	0.3741	-0.0096	0.0018	9e-08	683891
rs4822005	22:41514155	EP300	A/G	0.6201	0.0095	0.0018	9.5e-08	692013
rs13021322	2:63558590	WDPCP	T/C	0.4318	0.0092	0.0017	9.5e-08	691561
rs12580349	12:49436724	KMT2D	A/G	0.637	-0.0097	0.0018	9.6e-08	688209
rs6580698	12:49478658	KMT2D	T/C	0.5543	-0.0092	0.0017	1.2e-07	685265
rs10868219	9:87246283	NTRK2	A/G	0.7178	0.0101	0.0019	1.2e-07	691495
rs7773661	6:100919209	SIM1	A/G	0.4573	-0.0091	0.0017	1.2e-07	692598
rs766314	22:41490680	EP300	C/G	0.6227	0.0094	0.0018	1.3e-07	689227
rs10173115	2:63355520	WDPCP	A/T	0.465	0.0091	0.0017	1.3e-07	684346
rs139434	22:41604785	EP300	A/G	0.6206	0.0094	0.0018	1.4e-07	691844
rs10783302	12:49498130	KMT2D	T/G	0.3727	0.0095	0.0018	1.5e-07	691013
rs11691192	2:63561079	WDPCP	A/C	0.4318	0.0091	0.0017	1.5e-07	685315
rs9611497	22:41507400	EP300	A/G	0.3788	-0.0094	0.0018	1.7e-07	689536
rs4840132	6:100914602	SIM1	T/C	0.5415	0.009	0.0017	1.7e-07	691237
rs2994322	1:243639018	SDCCAG8	C/G	0.8048	-0.0121	0.0023	1.8e-07	672797
rs2267424	22:41489526	EP300	A/C	0.6204	0.0093	0.0018	1.9e-07	689225
rs8061877	16:28856819	SH2B1	T/C	0.2449	-0.0109	0.0021	1.9e-07	594804
rs1506080	6:100889855	SIM1	A/T	0.2647	-0.0101	0.0019	2e-07	692110
rs241819	6:100910798	SIM1	A/G	0.5413	0.0089	0.0017	2e-07	692550
rs3798492	6:100888625	SIM1	T/C	0.265	-0.0101	0.0019	2e-07	691943
rs4822002	22:41487344	EP300	A/G	0.6202	0.0093	0.0018	2.1e-07	689141
rs4822004	22:41502825	EP300	T/G	0.3799	-0.0093	0.0018	2.1e-07	689320
rs139886	22:38371328	SOX10	T/C	0.6266	-0.0096	0.0019	2.2e-07	593570
rs3798490	6:100894179	SIM1	A/G	0.7349	0.01	0.0019	2.6e-07	692598
rs2108430	16:3738078	CREBBP	T/C	0.2599	0.0102	0.002	2.7e-07	683601
rs3830139	6:100896289	SIM1	T/G	0.7346	0.0102	0.002	2.9e-07	636230
rs13387839	2:63428571	WDPCP	T/C	0.2853	0.0092	0.0018	2.9e-07	791783
rs833836	12:49451459	KMT2D	T/C	0.1441	-0.013	0.0025	3.1e-07	670427
rs5758231	22:41504049	EP300	C/G	0.3817	-0.0091	0.0018	3.3e-07	683552
rs12118439	1:243596371	SDCCAG8	T/C	0.1524	-0.0122	0.0024	3.6e-07	690912
rs139465	22:41614113	EP300	T/C	0.3782	-0.0093	0.0018	3.9e-07	638000
rs6026567	20:57444915	GNAS	A/G	0.571	-0.0092	0.0018	4.4e-07	659708
rs12039979	1:243597228	SDCCAG8	A/G	0.1524	-0.0122	0.0024	4.5e-07	679533
rs12140393	1:243596231	SDCCAG8	A/G	0.1524	-0.0122	0.0024	4.5e-07	679156
rs3778032	6:100883851	SIM1	A/C	0.736	0.0097	0.0019	4.7e-07	692542
rs12713488	2:63586777	WDPCP	T/C	0.438	0.0087	0.0017	4.7e-07	691424
rs2144342	22:41513094	EP300	T/G	0.6201	0.0092	0.0018	4.8e-07	638264
rs7296288	12:49479968	KMT2D	A/C	0.5129	-0.0089	0.0018	4.8e-07	675571
rs1996401	2:63573748	WDPCP	T/G	0.4378	0.0087	0.0017	4.9e-07	691881
rs7513566	1:243588601	SDCCAG8	T/C	0.1528	-0.0114	0.0023	5e-07	793570
rs11682642	2:63608550	WDPCP	C/G	0.5616	-0.0086	0.0017	5e-07	692194
rs12615652	2:63607538	WDPCP	C/G	0.5616	-0.0086	0.0017	5.1e-07	692112
rs262507	2:63883612	WDPCP	A/C	0.2803	0.0096	0.0019	5.1e-07	687544
rs12988058	2:63592397	WDPCP	C/G	0.562	-0.0086	0.0017	5.2e-07	692179
rs7538558	1:243589513	SDCCAG8	A/G	0.1527	-0.0121	0.0024	5.4e-07	678882
rs7537757	1:243594664	SDCCAG8	C/G	0.1527	-0.0121	0.0024	5.5e-07	678968
rs6722981	2:63916722	WDPCP	T/C	0.3472	-0.0091	0.0018	5.5e-07	684203
rs1607201	2:63614160	WDPCP	C/G	0.5613	-0.0086	0.0017	5.6e-07	692089
rs17765088	3:45943595	LZTFL1	C/G	0.8817	-0.0136	0.0027	5.7e-07	666309
rs3778030	6:100906046	SIM1	T/G	0.2651	-0.0097	0.0019	5.7e-07	690036
rs12138272	1:243594202	SDCCAG8	A/G	0.1527	-0.0121	0.0024	5.8e-07	678957
rs6735907	2:63731604	WDPCP	A/G	0.5548	0.0086	0.0017	5.8e-07	689962
rs10927017	1:243595813	SDCCAG8	A/G	0.1524	-0.0121	0.0024	5.9e-07	679134
rs1922422	2:63593212	WDPCP	T/C	0.5616	-0.0086	0.0017	5.9e-07	692117
rs767933	6:100888408	SIM1	C/G	0.2987	-0.0093	0.0019	6e-07	691606
rs262501	2:63858657	WDPCP	A/G	0.7115	-0.0094	0.0019	6.1e-07	690734
rs12151606	2:63430175	WDPCP	T/C	0.6952	-0.0089	0.0018	6.3e-07	792363
rs2422008	2:63780605	WDPCP	A/C	0.4324	-0.0086	0.0017	6.5e-07	690008
rs139889	22:38386787	SOX10	A/C	0.681	-0.0093	0.0019	6.6e-07	690052
rs262503	2:63860437	WDPCP	A/G	0.7114	-0.0094	0.0019	6.6e-07	690762
rs196125	2:63859268	WDPCP	T/C	0.7118	-0.0094	0.0019	7e-07	690745
rs7584404	2:63794342	WDPCP	T/C	0.7125	-0.0094	0.0019	7e-07	690815
rs10200146	2:63819348	WDPCP	A/G	0.4395	-0.0085	0.0017	7.1e-07	690559
rs13417333	2:63913840	WDPCP	T/C	0.3468	-0.009	0.0018	7.1e-07	683484
rs2677436	2:63495935	WDPCP	A/T	0.2915	0.0093	0.0019	7.1e-07	691776
rs7959831	12:49474232	KMT2D	T/G	0.1477	-0.0122	0.0025	7.2e-07	673479
rs262504	2:63861235	WDPCP	C/G	0.2884	0.0093	0.0019	7.3e-07	690746
rs2168275	2:63912336	WDPCP	A/G	0.6533	0.009	0.0018	7.6e-07	683373
rs2138796	2:63609017	WDPCP	A/T	0.4398	0.0085	0.0017	7.8e-07	692037
rs2699388	2:63496137	WDPCP	A/C	0.7107	-0.0093	0.0019	7.8e-07	691711
rs1001904	9:87271616	NTRK2	T/C	0.892	0.0137	0.0028	7.9e-07	692554
rs4671492	2:63594846	WDPCP	T/C	0.438	0.0085	0.0017	8e-07	692281
rs1550860	2:63779539	WDPCP	T/C	0.2847	0.0094	0.0019	8.4e-07	691108
rs4560098	2:63522578	WDPCP	A/G	0.2896	0.0093	0.0019	8.4e-07	692121
rs4416201	2:63512837	WDPCP	A/G	0.2894	0.0093	0.0019	8.5e-07	691994
rs1001905	9:87272519	NTRK2	A/G	0.108	-0.0136	0.0028	8.7e-07	692574
rs190519	2:63858425	WDPCP	A/T	0.7029	-0.0093	0.0019	8.7e-07	690015
rs6545984	2:63517133	WDPCP	T/G	0.2894	0.0093	0.0019	8.7e-07	691984
rs6705776	2:63521487	WDPCP	T/C	0.2895	0.0093	0.0019	8.7e-07	692129
rs970278	2:63497554	WDPCP	A/C	0.2879	0.0093	0.0019	8.8e-07	691835
rs4428008	2:63522515	WDPCP	T/C	0.7105	-0.0093	0.0019	8.9e-07	692121
rs964903	2:63741548	WDPCP	T/C	0.7125	-0.0093	0.0019	8.9e-07	691627
rs1147195	9:87273174	NTRK2	T/C	0.108	-0.0136	0.0028	9.1e-07	692547
rs1659412	9:87278152	NTRK2	A/G	0.892	0.0136	0.0028	9.1e-07	685059
rs12105140	2:63797218	WDPCP	A/G	0.2862	0.0093	0.0019	9.1e-07	690718
rs10173637	2:63512121	WDPCP	A/G	0.2879	0.0093	0.0019	9.2e-07	691966
rs932173	2:63602689	WDPCP	T/G	0.5599	-0.0084	0.0017	9.2e-07	692219
rs1201364	9:87267378	NTRK2	A/G	0.108	-0.0136	0.0028	9.3e-07	692396
rs2945032	2:63498200	WDPCP	A/C	0.7107	-0.0092	0.0019	9.4e-07	691923
rs6717031	2:63774540	WDPCP	T/C	0.7153	-0.0094	0.0019	9.4e-07	691075
rs12713476	2:63509850	WDPCP	T/G	0.2894	0.0092	0.0019	9.5e-07	692016
rs6738190	2:63767199	WDPCP	A/G	0.2845	0.0094	0.0019	9.8e-07	690856
rs12713496	2:63768467	WDPCP	T/C	0.2845	0.0093	0.0019	9.9e-07	690861
rs1607203	2:63494269	WDPCP	T/C	0.2893	0.0092	0.0019	9.9e-07	691757
rs2166494	2:63778628	WDPCP	A/T	0.7149	-0.0093	0.0019	9.9e-07	691093
rs2677439	2:63496998	WDPCP	A/G	0.2879	0.0092	0.0019	9.9e-07	691843
rs4611627	2:63517996	WDPCP	T/G	0.2905	0.0092	0.0019	9.9e-07	692108
rs2072379	16:3738887	CREBBP	T/C	0.6697	0.0091	0.0019	1e-06	691256
rs780092	2:27743154	IFT172	A/G	0.8458	-0.0107	0.0022	1e-06	795511
rs17060614	6:100895462	SIM1	T/G	0.2992	-0.0092	0.0019	1e-06	692097
rs1023820	2:63764963	WDPCP	C/G	0.7155	-0.0093	0.0019	1e-06	690870
rs11125957	2:63518472	WDPCP	A/G	0.7106	-0.0092	0.0019	1e-06	692118
rs2421881	2:63512685	WDPCP	T/C	0.2879	0.0092	0.0019	1e-06	691965
rs262472	2:63833616	WDPCP	A/G	0.7121	-0.0092	0.0019	1e-06	691207
rs2677438	2:63496076	WDPCP	C/G	0.2893	0.0092	0.0019	1e-06	691592
rs4671515	2:63768917	WDPCP	T/C	0.2845	0.0093	0.0019	1e-06	690863
rs7585664	2:63548716	WDPCP	T/C	0.713	-0.0093	0.0019	1e-06	689532
rs959195	2:63804125	WDPCP	A/G	0.7115	-0.0092	0.0019	1e-06	691501
rs11161347	15:23948049	NDN	A/G	0.4831	0.0085	0.0018	1.1e-06	672682
rs1936435	9:87383777	NTRK2	A/C	0.3004	-0.0092	0.0019	1.1e-06	686240
rs4877877	9:87363424	NTRK2	C/G	0.304	-0.0092	0.0019	1.1e-06	689238
rs1876156	6:100853996	SIM1	C/G	0.3496	0.0087	0.0018	1.1e-06	691564
rs3778037	6:100844095	SIM1	T/C	0.6502	-0.0087	0.0018	1.1e-06	692600
rs11895059	2:63601260	WDPCP	T/G	0.4405	0.0084	0.0017	1.1e-06	692373
rs1446565	2:63731575	WDPCP	T/C	0.2875	0.0092	0.0019	1.1e-06	691777
rs174485	2:63857402	WDPCP	A/G	0.7116	-0.0092	0.0019	1.1e-06	690212
rs1867847	2:63777155	WDPCP	A/G	0.7154	-0.0093	0.0019	1.1e-06	691007
rs196124	2:63854138	WDPCP	A/G	0.2884	0.0092	0.0019	1.1e-06	690583
rs2421916	2:63447682	WDPCP	T/G	0.6261	0.0082	0.0017	1.1e-06	787706
rs2421952	2:63749833	WDPCP	T/C	0.2875	0.0092	0.0019	1.1e-06	691839
rs2604613	2:63832776	WDPCP	A/G	0.7121	-0.0092	0.0019	1.1e-06	691211
rs262476	2:63870607	WDPCP	T/C	0.713	-0.0092	0.0019	1.1e-06	690328
rs262493	2:63845066	WDPCP	A/C	0.7112	-0.0092	0.0019	1.1e-06	690552
rs7596446	2:63512206	WDPCP	T/C	0.2879	0.0092	0.0019	1.1e-06	684845
rs964880	2:63826932	WDPCP	A/C	0.7121	-0.0092	0.0019	1.1e-06	691276
rs7497973	15:23948571	NDN	A/G	0.5162	-0.0086	0.0018	1.2e-06	663503
rs1662697	9:87395876	NTRK2	T/G	0.3012	-0.0092	0.0019	1.2e-06	684069
rs12049318	1:243593660	SDCCAG8	A/C	0.1569	-0.0117	0.0024	1.2e-06	679044
rs3734353	6:100896569	SIM1	T/G	0.6999	0.0091	0.0019	1.2e-06	690001
rs10168545	2:63734284	WDPCP	A/C	0.7124	-0.0091	0.0019	1.2e-06	691729
rs10469944	2:63816672	WDPCP	C/G	0.2881	0.0091	0.0019	1.2e-06	691361
rs10469945	2:63816776	WDPCP	T/C	0.2882	0.0092	0.0019	1.2e-06	691359
rs1446569	2:63818314	WDPCP	C/G	0.2881	0.0091	0.0019	1.2e-06	691314
rs1607205	2:63500508	WDPCP	A/G	0.7107	-0.0091	0.0019	1.2e-06	691504
rs185499	2:63867523	WDPCP	T/G	0.7135	-0.0092	0.0019	1.2e-06	690404
rs2121350	2:63778919	WDPCP	A/G	0.2846	0.0093	0.0019	1.2e-06	691158
rs262473	2:63833813	WDPCP	T/G	0.7118	-0.0091	0.0019	1.2e-06	691288
rs262487	2:63880517	WDPCP	A/C	0.2881	0.0092	0.0019	1.2e-06	690341
rs6546018	2:63817422	WDPCP	T/G	0.7112	-0.0091	0.0019	1.2e-06	691366
rs6546019	2:63817440	WDPCP	A/G	0.2884	0.0091	0.0019	1.2e-06	691367
rs7576316	2:63741122	WDPCP	A/G	0.7124	-0.0091	0.0019	1.2e-06	691790
rs1852029	15:23947116	NDN	T/G	0.515	-0.0085	0.0018	1.3e-06	673355
rs1255	2:63825934	WDPCP	T/C	0.2879	0.0091	0.0019	1.3e-06	691303
rs1356388	2:63595981	WDPCP	T/C	0.4393	0.0083	0.0017	1.3e-06	692318
rs1867849	2:63726932	WDPCP	T/C	0.7125	-0.0091	0.0019	1.3e-06	691663
rs2422007	2:63780776	WDPCP	A/C	0.2889	0.0092	0.0019	1.3e-06	691056
rs262505	2:63861786	WDPCP	T/C	0.7128	-0.0091	0.0019	1.3e-06	690640
rs6546007	2:63724795	WDPCP	T/C	0.7126	-0.0092	0.0019	1.3e-06	691637
rs989527	2:63726791	WDPCP	T/G	0.7125	-0.0091	0.0019	1.3e-06	691655
rs6744393	2:27750139	IFT172	T/C	0.1538	0.012	0.0025	1.4e-06	553470
rs1187362	9:87338267	NTRK2	A/T	0.6978	0.0091	0.0019	1.4e-06	685665
rs6420253	9:87381820	NTRK2	T/C	0.6909	0.0091	0.0019	1.4e-06	686580
rs893584	9:87290992	NTRK2	A/G	0.4196	-0.0084	0.0017	1.4e-06	687583
rs10865338	2:63732509	WDPCP	A/G	0.2875	0.0091	0.0019	1.4e-06	691762
rs112194	2:63876872	WDPCP	T/G	0.2865	0.0092	0.0019	1.4e-06	690389
rs11899999	2:63601292	WDPCP	A/G	0.4401	0.0083	0.0017	1.4e-06	692563
rs1446564	2:63731682	WDPCP	A/G	0.2875	0.0091	0.0019	1.4e-06	691780
rs262483	2:63877246	WDPCP	C/G	0.7135	-0.0092	0.0019	1.4e-06	690304
rs6546009	2:63745742	WDPCP	C/G	0.7126	-0.0091	0.0019	1.4e-06	691840
rs7570031	2:63792265	WDPCP	A/G	0.2865	0.0091	0.0019	1.4e-06	691193
rs618838	11:66328719	BBS1	T/C	0.4526	0.0085	0.0018	1.5e-06	643219
rs2293445	12:49398862	KMT2D	A/G	0.3946	0.0085	0.0018	1.5e-06	690225
rs699330	15:23936670	MAGEL2	T/G	0.3944	0.0088	0.0018	1.5e-06	658946
rs2215753	15:23945167	NDN	T/C	0.484	0.0085	0.0018	1.5e-06	659453
rs1876157	6:100854133	SIM1	T/C	0.65	-0.0086	0.0018	1.5e-06	691575
rs1031221	2:63742810	WDPCP	T/C	0.2875	0.0091	0.0019	1.5e-06	691882
rs11693909	2:63777670	WDPCP	T/C	0.2834	0.0092	0.0019	1.5e-06	691067
rs262477	2:63870959	WDPCP	T/G	0.2864	0.0091	0.0019	1.5e-06	690413
rs262482	2:63877042	WDPCP	T/C	0.7135	-0.0091	0.0019	1.5e-06	690358
rs262484	2:63878015	WDPCP	A/G	0.2864	0.0091	0.0019	1.5e-06	690334
rs752579	17:17660347	RAI1	T/C	0.6077	0.0082	0.0017	1.6e-06	781905
rs187801	2:63867446	WDPCP	T/G	0.7135	-0.0091	0.0019	1.6e-06	690327
rs262490	2:63837651	WDPCP	A/G	0.2879	0.009	0.0019	1.6e-06	691033
rs9789351	2:63740614	WDPCP	A/G	0.2875	0.009	0.0019	1.6e-06	691763
rs3782357	12:49427652	KMT2D	T/C	0.394	0.0084	0.0018	1.8e-06	688634
rs1778933	9:87324411	NTRK2	T/C	0.6714	0.0088	0.0018	1.8e-06	691087
rs1936434	9:87383801	NTRK2	T/G	0.3007	-0.009	0.0019	1.8e-06	686044
rs2579375	9:87261958	NTRK2	T/C	0.1073	-0.0132	0.0028	1.8e-06	691420
rs1411578	6:57054843	RAB23	C/G	0.8428	-0.0111	0.0023	1.8e-06	690046
rs4925108	17:17649423	RAI1	T/C	0.5995	0.0081	0.0017	1.8e-06	781581
rs10176522	2:63722433	WDPCP	T/C	0.2863	0.0091	0.0019	1.8e-06	692004
rs1022351	2:63649731	WDPCP	T/C	0.4215	-0.0083	0.0017	1.8e-06	690114
rs2305157	2:63822785	WDPCP	T/C	0.2868	0.009	0.0019	1.8e-06	690633
rs10875913	12:49419308	KMT2D	T/C	0.6048	-0.0084	0.0018	1.9e-06	690014
rs13211871	6:100835221	SIM1	T/C	0.6479	-0.0085	0.0018	1.9e-06	692537
rs12713478	2:63526336	WDPCP	T/C	0.6969	-0.0089	0.0019	1.9e-06	692388
rs2051128	9:87376774	NTRK2	A/G	0.301	-0.0091	0.0019	2e-06	681033
rs11691718	2:63524614	WDPCP	A/G	0.697	-0.0089	0.0019	2e-06	691905
rs12994711	2:63528235	WDPCP	A/G	0.697	-0.0089	0.0019	2e-06	692427
rs2030188	2:63509313	WDPCP	C/G	0.6969	-0.0089	0.0019	2e-06	692288
rs262517	2:63891261	WDPCP	T/G	0.7139	-0.009	0.0019	2e-06	691382
rs6708847	2:63527581	WDPCP	T/C	0.3031	0.0089	0.0019	2e-06	692421
rs6709115	2:63527859	WDPCP	T/C	0.3044	0.0089	0.0019	2e-06	692397
rs10875915	12:49430094	KMT2D	T/C	0.3935	0.0084	0.0018	2.1e-06	688127
rs17060530	6:100859947	SIM1	T/C	0.6492	-0.0085	0.0018	2.1e-06	692233
rs4839779	6:100832728	SIM1	A/G	0.3511	0.0084	0.0018	2.1e-06	692536
rs13422170	2:63645747	WDPCP	T/C	0.5786	0.0082	0.0017	2.1e-06	690105
rs2028887	2:63716223	WDPCP	A/G	0.2911	0.0089	0.0019	2.1e-06	691272
rs4671476	2:63524639	WDPCP	T/C	0.303	0.0089	0.0019	2.1e-06	692408
rs7591562	2:63525102	WDPCP	A/G	0.697	-0.0089	0.0019	2.1e-06	692395
rs7026180	9:87385256	NTRK2	A/C	0.3008	-0.009	0.0019	2.2e-06	685621
rs1395119	6:100837889	SIM1	A/T	0.3514	0.0084	0.0018	2.2e-06	692597
rs1400688	2:63538536	WDPCP	T/C	0.697	-0.0088	0.0019	2.2e-06	692319
rs1517404	2:63537557	WDPCP	A/T	0.697	-0.0088	0.0019	2.2e-06	692254
rs262502	2:63859723	WDPCP	T/C	0.2917	0.0089	0.0019	2.2e-06	690565
rs7599208	2:63622470	WDPCP	T/C	0.5596	-0.0083	0.0017	2.2e-06	679687
rs2202537	6:100833287	SIM1	A/G	0.3518	0.0084	0.0018	2.3e-06	692533
rs241812	6:100890991	SIM1	A/G	0.6971	0.0088	0.0019	2.3e-06	692311
rs3778040	6:100840380	SIM1	A/G	0.351	0.0084	0.0018	2.3e-06	692597
rs9390366	6:100864938	SIM1	T/G	0.7753	-0.0097	0.0021	2.3e-06	691291
rs6545989	2:63545267	WDPCP	A/G	0.6969	-0.0089	0.0019	2.3e-06	692350
rs7599736	2:63548856	WDPCP	T/C	0.303	0.0088	0.0019	2.3e-06	692305
rs12140679	1:243606691	SDCCAG8	T/G	0.1564	-0.0112	0.0024	2.4e-06	692130
rs10171190	2:63650794	WDPCP	T/C	0.5785	0.0082	0.0017	2.4e-06	689905
rs11675647	2:63528437	WDPCP	C/G	0.6969	-0.0088	0.0019	2.4e-06	692387
rs11684108	2:63514287	WDPCP	C/G	0.6971	-0.0088	0.0019	2.4e-06	692402
rs12713477	2:63514622	WDPCP	T/C	0.3029	0.0088	0.0019	2.4e-06	692402
rs1400687	2:63538766	WDPCP	A/C	0.3031	0.0088	0.0019	2.4e-06	692299
rs4671480	2:63547488	WDPCP	T/G	0.3031	0.0088	0.0019	2.4e-06	692342
rs6545986	2:63525117	WDPCP	A/G	0.303	0.0088	0.0019	2.4e-06	692346
rs10169292	2:63553235	WDPCP	T/G	0.6967	-0.0088	0.0019	2.5e-06	692235
rs10207356	2:63512015	WDPCP	T/C	0.3014	0.0088	0.0019	2.5e-06	692251
rs1400686	2:63542507	WDPCP	A/G	0.6969	-0.0088	0.0019	2.5e-06	692332
rs4671471	2:63513924	WDPCP	T/C	0.6971	-0.0088	0.0019	2.5e-06	692385
rs4671473	2:63515934	WDPCP	T/C	0.6956	-0.0088	0.0019	2.5e-06	692393
rs4671484	2:63554740	WDPCP	T/C	0.3031	0.0088	0.0019	2.5e-06	692114
rs4671506	2:63645034	WDPCP	A/G	0.5689	0.0081	0.0017	2.5e-06	689750
rs6713500	2:63529031	WDPCP	T/G	0.3031	0.0088	0.0019	2.5e-06	692402
rs6724044	2:63515755	WDPCP	T/C	0.697	-0.0088	0.0019	2.5e-06	692320
rs10875914	12:49422094	KMT2D	A/G	0.59	-0.0084	0.0018	2.6e-06	678344
rs10868231	9:87474397	NTRK2	A/G	0.7095	-0.0084	0.0018	2.6e-06	791825
rs9322033	6:100852016	SIM1	T/C	0.2237	0.0096	0.0021	2.6e-06	688321
rs262488	2:63882179	WDPCP	T/C	0.7135	-0.0089	0.0019	2.6e-06	691502
rs262531	2:63904951	WDPCP	A/C	0.2857	0.0089	0.0019	2.6e-06	691301
rs4671470	2:63513913	WDPCP	A/G	0.6971	-0.0088	0.0019	2.6e-06	692384
rs6545991	2:63549063	WDPCP	A/G	0.3031	0.0088	0.0019	2.6e-06	692330
rs6706180	2:63530801	WDPCP	A/G	0.697	-0.0088	0.0019	2.6e-06	692308
rs6725694	2:63510902	WDPCP	C/G	0.6971	-0.0088	0.0019	2.6e-06	692291
rs7558922	2:63548692	WDPCP	A/G	0.3031	0.0088	0.0019	2.6e-06	692336
rs7559137	2:63548868	WDPCP	A/C	0.3031	0.0088	0.0019	2.6e-06	692336
rs1573219	9:87387622	NTRK2	A/G	0.303	-0.0089	0.0019	2.7e-06	685982
rs7038866	9:87387907	NTRK2	A/G	0.3008	-0.0089	0.0019	2.7e-06	684976
rs1517405	2:63515568	WDPCP	T/C	0.6971	-0.0087	0.0019	2.7e-06	692326
rs262537	2:63907331	WDPCP	T/C	0.7145	-0.009	0.0019	2.7e-06	685441
rs6744720	2:63521033	WDPCP	T/G	0.697	-0.0087	0.0019	2.7e-06	692376
rs7606045	2:63826528	WDPCP	T/G	0.2918	0.0088	0.0019	2.7e-06	691182
rs540874	11:66329732	BBS1	A/G	0.4452	0.0081	0.0017	2.8e-06	692477
rs11168839	12:49457635	KMT2D	A/G	0.3963	0.0083	0.0018	2.8e-06	688731
rs2304275	12:49442813	KMT2D	T/C	0.699	-0.0092	0.002	2.8e-06	628516
rs1539676	9:87390167	NTRK2	T/C	0.3008	-0.0089	0.0019	2.8e-06	684536
rs7551067	1:243606579	SDCCAG8	A/T	0.1559	-0.0111	0.0024	2.8e-06	680291
rs9403740	6:100842895	SIM1	T/C	0.35	0.0085	0.0018	2.8e-06	680857
rs12713486	2:63557809	WDPCP	T/C	0.5461	-0.008	0.0017	2.8e-06	691835
rs262506	2:63863022	WDPCP	A/G	0.2881	0.0096	0.002	2.8e-06	527366
rs4671481	2:63547527	WDPCP	A/G	0.3031	0.0087	0.0019	2.8e-06	692319
rs4671495	2:63607943	WDPCP	T/G	0.546	-0.008	0.0017	2.8e-06	692068
rs6708627	2:63543926	WDPCP	A/G	0.3031	0.0087	0.0019	2.8e-06	692350
rs1671064	11:66327673	BBS1	A/G	0.5547	-0.0081	0.0017	2.9e-06	692553
rs6702894	1:243608642	SDCCAG8	A/G	0.7878	0.0098	0.0021	2.9e-06	691194
rs4671474	2:63516104	WDPCP	A/C	0.6971	-0.0087	0.0019	2.9e-06	692344
rs6734468	2:63530569	WDPCP	A/C	0.303	0.0087	0.0019	2.9e-06	690897
rs10747561	12:49500509	KMT2D	T/C	0.3433	0.0085	0.0018	3e-06	689528
rs1517401	2:63540707	WDPCP	A/G	0.3032	0.0087	0.0019	3e-06	692317
rs166385	2:63888023	WDPCP	A/T	0.7282	-0.0093	0.002	3e-06	683063
rs2421882	2:63556849	WDPCP	T/G	0.5461	-0.008	0.0017	3e-06	691685
rs9390335	6:100830493	SIM1	T/C	0.6486	-0.0083	0.0018	3.1e-06	692051
rs10164844	2:63652403	WDPCP	T/C	0.4138	-0.0081	0.0017	3.1e-06	689923
rs2421885	2:63577041	WDPCP	A/G	0.5464	-0.008	0.0017	3.1e-06	692401
rs2421886	2:63579312	WDPCP	T/C	0.3033	0.0087	0.0019	3.1e-06	691979
rs262470	2:63830559	WDPCP	T/C	0.7118	-0.0095	0.002	3.1e-06	527237
rs6723088	2:63916826	WDPCP	T/C	0.3614	-0.0084	0.0018	3.1e-06	684093
rs678397	11:66324583	BBS1	T/C	0.4581	0.0081	0.0017	3.2e-06	686722
rs11168854	12:49485373	KMT2D	C/G	0.6348	-0.008	0.0017	3.2e-06	791378
rs2490392	1:243462523	SDCCAG8	A/G	0.8272	0.0108	0.0023	3.2e-06	691026
rs9403711	6:100824183	SIM1	A/G	0.2254	0.0095	0.002	3.2e-06	692606
rs9403718	6:100827450	SIM1	T/C	0.7733	-0.0095	0.002	3.2e-06	692425
rs2176417	2:63578594	WDPCP	C/G	0.6952	-0.0087	0.0019	3.2e-06	691791
rs2421891	2:63652804	WDPCP	T/C	0.4144	-0.0081	0.0017	3.2e-06	681796
rs7561802	2:63562066	WDPCP	T/C	0.6969	-0.0087	0.0019	3.2e-06	691535
rs509556	11:66326362	BBS1	A/G	0.4552	0.008	0.0017	3.3e-06	692437
rs677488	11:66324762	BBS1	T/C	0.5445	-0.008	0.0017	3.3e-06	692582
rs11691357	2:63561449	WDPCP	A/G	0.3031	0.0087	0.0019	3.3e-06	691868
rs3798499	6:100864829	SIM1	T/C	0.6488	-0.0084	0.0018	3.4e-06	690399
rs11686044	2:63561332	WDPCP	T/G	0.3031	0.0087	0.0019	3.4e-06	691917
rs2176416	2:63590255	WDPCP	A/G	0.3031	0.0087	0.0019	3.4e-06	691596
rs2699389	2:63494931	WDPCP	A/G	0.2893	0.0095	0.002	3.4e-06	535537
rs2951192	2:63502533	WDPCP	A/T	0.2894	0.0095	0.002	3.4e-06	528742
rs6545997	2:63562146	WDPCP	A/C	0.3067	0.0087	0.0019	3.4e-06	691913
rs6717060	2:63568608	WDPCP	A/G	0.6953	-0.0087	0.0019	3.4e-06	691731
rs10209490	2:63651996	WDPCP	A/G	0.4147	-0.008	0.0017	3.5e-06	690141
rs1878507	2:63573411	WDPCP	T/C	0.5465	-0.008	0.0017	3.5e-06	691640
rs4671496	2:63607980	WDPCP	C/G	0.546	-0.008	0.0017	3.5e-06	692012
rs1100806	15:23942935	NDN	A/G	0.5676	-0.0089	0.0019	3.6e-06	512067
rs11398	6:57053947	RAB23	T/C	0.8428	-0.0109	0.0023	3.6e-06	677725
rs1517409	2:63575082	WDPCP	A/G	0.3037	0.0086	0.0019	3.6e-06	691907
rs2421892	2:63653103	WDPCP	C/G	0.5859	0.0081	0.0017	3.6e-06	690007
rs6718198	2:63584129	WDPCP	T/C	0.5465	-0.008	0.0017	3.6e-06	692022
rs1546393	6:100849730	SIM1	T/C	0.3502	0.0084	0.0018	3.7e-06	680117
rs1488831	11:27637014	BDNF	T/G	0.06051	0.0158	0.0034	3.8e-06	787580
rs814295	2:27743215	IFT172	A/G	0.8431	-0.01	0.0022	3.8e-06	795249
rs2117029	12:49408440	KMT2D	A/T	0.6047	-0.0082	0.0018	3.8e-06	688544
rs12988024	2:63585304	WDPCP	A/C	0.5464	-0.0079	0.0017	3.8e-06	692022
rs12144227	1:243604964	SDCCAG8	C/G	0.1559	-0.0111	0.0024	3.9e-06	680407
rs6545988	2:63542732	WDPCP	A/C	0.3083	0.0087	0.0019	3.9e-06	685240
rs6546002	2:63593829	WDPCP	A/C	0.3052	0.0086	0.0019	3.9e-06	690361
rs572846	11:66331458	BBS1	A/G	0.4557	0.0079	0.0017	4e-06	691609
rs941444	17:17693891	RAI1	C/G	0.3887	-0.0083	0.0018	4e-06	691985
rs3827351	22:37157240	IFT27	A/C	0.7301	0.009	0.002	4.2e-06	691952
rs2699390	2:63494848	WDPCP	T/C	0.7107	-0.0094	0.002	4.2e-06	528576
rs262521	2:63892485	WDPCP	A/G	0.7279	-0.0088	0.0019	4.3e-06	691892
rs6559829	9:87393013	NTRK2	T/C	0.6941	0.0087	0.0019	4.4e-06	684380
rs11125967	2:63584792	WDPCP	A/G	0.3032	0.0086	0.0019	4.4e-06	691589
rs262508	2:63885280	WDPCP	C/G	0.7279	-0.0089	0.0019	4.4e-06	690649
rs2699391	2:63494107	WDPCP	T/C	0.2878	0.0094	0.002	4.4e-06	528501
rs4671061	2:63653816	WDPCP	T/C	0.414	-0.008	0.0017	4.4e-06	689943
rs4671494	2:63604998	WDPCP	T/C	0.695	-0.0086	0.0019	4.4e-06	690210
rs6546001	2:63593819	WDPCP	A/G	0.3037	0.0086	0.0019	4.5e-06	690289
rs1048015	22:37163080	IFT27	T/C	0.731	0.009	0.002	4.6e-06	692264
rs1475995	22:37159393	IFT27	T/C	0.7313	0.009	0.002	4.6e-06	692191
rs10209822	2:63572447	WDPCP	T/G	0.3032	0.0086	0.0019	4.6e-06	691813
rs1022353	2:63652198	WDPCP	T/G	0.4143	-0.008	0.0017	4.6e-06	690161
rs2176418	2:63575792	WDPCP	T/C	0.3033	0.0085	0.0019	4.6e-06	691866
rs262479	2:63872479	WDPCP	T/C	0.7136	-0.0094	0.002	4.6e-06	527336
rs6731136	2:63647909	WDPCP	T/C	0.4143	-0.008	0.0017	4.6e-06	690053
rs1387144	11:27635319	BDNF	A/C	0.5938	0.0076	0.0017	4.8e-06	792607
rs2422011	2:63774989	WDPCP	A/G	0.2847	0.0084	0.0018	4.8e-06	777710
rs11894445	2:63592348	WDPCP	A/G	0.3037	0.0085	0.0019	4.9e-06	690325
rs2090479	2:63529861	WDPCP	T/G	0.3031	0.0085	0.0019	4.9e-06	692428
rs13011799	2:63597250	WDPCP	T/C	0.3036	0.0085	0.0019	5e-06	690333
rs7558796	2:63597108	WDPCP	A/T	0.6964	-0.0085	0.0019	5e-06	690344
rs932172	2:63602897	WDPCP	T/C	0.3036	0.0085	0.0019	5e-06	690378
rs560556	11:66338118	BBS1	A/G	0.4545	0.0079	0.0017	5.1e-06	690972
rs3741621	12:49494025	KMT2D	T/C	0.6577	-0.0084	0.0018	5.1e-06	688750
rs2421887	2:63606219	WDPCP	T/C	0.3035	0.0085	0.0019	5.1e-06	690362
rs7756421	6:57034009	RAB23	A/G	0.8553	-0.0111	0.0024	5.2e-06	692235
rs908622	2:63579685	WDPCP	T/C	0.3049	0.0085	0.0019	5.2e-06	691686
rs10209140	2:63922369	WDPCP	A/G	0.3623	-0.0081	0.0018	5.3e-06	692415
rs4671479	2:63545598	WDPCP	A/T	0.3031	0.0091	0.002	5.3e-06	536243
rs7355671	2:63592499	WDPCP	T/C	0.5462	-0.0079	0.0017	5.3e-06	686208
rs17244217	11:27791110	BDNF	T/G	0.2648	0.0089	0.002	5.4e-06	677654
rs2292795	2:63605430	WDPCP	A/G	0.3036	0.0085	0.0019	5.4e-06	690238
rs2901580	2:63606274	WDPCP	T/C	0.6965	-0.0085	0.0019	5.4e-06	690352
rs9403728	6:100831568	SIM1	A/C	0.6484	-0.0082	0.0018	5.5e-06	680830
rs10167849	2:63598639	WDPCP	A/G	0.5437	-0.0078	0.0017	5.5e-06	692145
rs12618974	2:63607443	WDPCP	T/C	0.3035	0.0085	0.0019	5.5e-06	690260
rs17060480	6:100836636	SIM1	A/T	0.7745	-0.0093	0.002	5.6e-06	688837
rs2295596	6:100834674	SIM1	T/C	0.2254	0.0093	0.002	5.6e-06	688816
rs11883730	2:63592230	WDPCP	T/G	0.6948	-0.0085	0.0019	5.6e-06	690386
rs1348806	2:63895884	WDPCP	A/T	0.272	0.0087	0.0019	5.6e-06	691983
rs2121353	2:63899330	WDPCP	T/C	0.728	-0.0087	0.0019	5.6e-06	691951
rs2592386	2:63894064	WDPCP	A/G	0.272	0.0087	0.0019	5.6e-06	692029
rs7571697	2:63597605	WDPCP	A/G	0.3036	0.0085	0.0019	5.6e-06	690330
rs3798511	6:100852753	SIM1	T/C	0.92019	-0.0143	0.0031	5.7e-06	692149
rs713991	22:38426043	SOX10	A/G	0.4363	0.0079	0.0017	5.7e-06	690479
rs262510	2:63886712	WDPCP	A/C	0.2721	0.0087	0.0019	5.8e-06	691833
rs2292794	2:63605772	WDPCP	A/G	0.3035	0.0085	0.0019	5.9e-06	690337
rs908621	2:63606042	WDPCP	T/C	0.6965	-0.0085	0.0019	5.9e-06	690337
rs5750307	22:37170977	IFT27	T/C	0.7309	0.0089	0.002	6e-06	691960
rs4840130	6:100833142	SIM1	T/C	0.2254	0.0093	0.002	6e-06	688837
rs4671488	2:63567514	WDPCP	T/C	0.6928	-0.0091	0.002	6e-06	527753
rs5758211	22:41466229	EP300	T/C	0.7816	0.0095	0.0021	6.1e-06	691991
rs2742396	3:45819701	LZTFL1	T/C	0.3386	0.0087	0.0019	6.1e-06	661251
rs10783299	12:49390677	KMT2D	T/C	0.6036	-0.0077	0.0017	6.2e-06	746435
rs7355552	2:63594650	WDPCP	T/C	0.5448	-0.0078	0.0017	6.2e-06	692124
rs12276167	11:27635571	BDNF	T/G	0.4103	-0.0075	0.0017	6.3e-06	790006
rs13028443	2:63603717	WDPCP	T/C	0.5444	-0.0078	0.0017	6.3e-06	692076
rs9386123	6:100824140	SIM1	T/C	0.2254	0.0092	0.002	6.4e-06	688959
rs9390332	6:100830259	SIM1	A/T	0.7746	-0.0092	0.002	6.4e-06	688802
rs171902	2:63903236	WDPCP	T/C	0.728	-0.0087	0.0019	6.4e-06	691836
rs5750306	22:37170915	IFT27	T/C	0.7305	0.0088	0.002	6.5e-06	691931
rs129336	22:37155457	IFT27	A/C	0.268	-0.0088	0.002	6.6e-06	692642
rs9376947	6:100825490	SIM1	A/G	0.7743	-0.0092	0.002	6.6e-06	688890
rs1922421	2:63592792	WDPCP	A/G	0.6932	-0.0084	0.0019	6.6e-06	690177
rs4671507	2:63645377	WDPCP	C/G	0.5816	0.0078	0.0017	6.6e-06	690580
rs12145833	1:243483754	SDCCAG8	T/G	0.8435	0.0108	0.0024	6.7e-06	690697
rs1506081	6:100825035	SIM1	A/G	0.6483	-0.0081	0.0018	6.7e-06	680700
rs3778036	6:100844105	SIM1	T/C	0.92025	-0.0141	0.0031	6.7e-06	692150
rs4578846	2:63554859	WDPCP	T/C	0.3031	0.0091	0.002	6.7e-06	528796
rs1506084	6:100813188	SIM1	A/G	0.3582	0.008	0.0018	6.8e-06	686580
rs1212171	9:87282527	NTRK2	T/C	0.5689	0.0078	0.0017	6.9e-06	690796
rs6723875	2:63911500	WDPCP	T/C	0.2949	-0.0085	0.0019	6.9e-06	683616
rs11687234	2:63634407	WDPCP	A/C	0.5816	0.0078	0.0017	7.1e-06	691990
rs1187353	9:87293253	NTRK2	A/G	0.4323	-0.0078	0.0017	7.2e-06	687118
rs12618946	2:63353041	WDPCP	A/G	0.3401	-0.0082	0.0018	7.2e-06	683987
rs262478	2:63872386	WDPCP	T/C	0.2853	0.0092	0.002	7.2e-06	527247
rs12713491	2:63604320	WDPCP	A/C	0.5444	-0.0077	0.0017	7.3e-06	691993
rs4840129	6:100826119	SIM1	T/C	0.3546	0.0081	0.0018	7.4e-06	680499
rs12713490	2:63603463	WDPCP	A/G	0.5443	-0.0077	0.0017	7.4e-06	691998
rs1659414	9:87270571	NTRK2	T/C	0.4324	-0.0078	0.0017	7.5e-06	690284
rs3026677	22:38432725	SOX10	C/G	0.4369	0.0078	0.0017	7.5e-06	690682
rs4313961	2:63554849	WDPCP	T/C	0.6956	-0.0091	0.002	7.6e-06	525103
rs993315	9:87287721	NTRK2	T/C	0.4305	-0.0077	0.0017	7.7e-06	691746
rs9403723	6:100830435	SIM1	C/G	0.6482	-0.0081	0.0018	7.7e-06	680738
rs1829259	2:63590646	WDPCP	T/C	0.5465	-0.0077	0.0017	7.7e-06	690720
rs12478262	2:63626556	WDPCP	T/G	0.4183	-0.0077	0.0017	7.8e-06	691723
rs8142174	22:38427963	SOX10	A/G	0.5632	-0.0078	0.0017	7.9e-06	690618
rs17060562	6:100870786	SIM1	T/C	0.96632	-0.0215	0.0048	8e-06	690374
rs1187349	9:87295571	NTRK2	A/G	0.4329	-0.0078	0.0017	8.1e-06	685235
rs1209068	9:87340518	NTRK2	T/C	0.1719	-0.0103	0.0023	8.1e-06	688082
rs932171	2:63602942	WDPCP	A/G	0.3051	0.0083	0.0019	8.1e-06	690342
rs7130131	11:27662826	BDNF	T/C	0.94136	-0.0152	0.0034	8.2e-06	782822
rs4821997	22:41464541	EP300	T/C	0.2188	-0.0093	0.0021	8.2e-06	691599
rs171901	2:63901700	WDPCP	C/G	0.272	0.0086	0.0019	8.2e-06	691544
rs4671472	2:63515912	WDPCP	A/C	0.6971	-0.009	0.002	8.4e-06	529059
rs13409031	2:63645846	WDPCP	A/G	0.4111	-0.0077	0.0017	8.6e-06	690833
rs12625436	20:57445213	GNAS	A/G	0.3944	0.008	0.0018	8.7e-06	680762
rs1201363	9:87268759	NTRK2	T/C	0.5624	0.0077	0.0017	8.8e-06	689673
rs1837304	9:87250605	NTRK2	A/C	0.45	-0.0077	0.0017	8.8e-06	691982
rs1348804	2:63895672	WDPCP	T/C	0.6968	-0.0087	0.0019	8.8e-06	636951
rs5995990	22:41462730	EP300	T/C	0.7821	0.0093	0.0021	8.9e-06	691925
rs1543692	9:87269223	NTRK2	A/G	0.4348	-0.0077	0.0017	8.9e-06	689737
rs6519095	22:38431917	SOX10	A/G	0.5624	-0.0077	0.0017	9e-06	690891
rs10182596	2:63550192	WDPCP	A/G	0.3031	0.009	0.002	9e-06	528921
rs1829261	2:63587157	WDPCP	A/G	0.306	0.0083	0.0019	9e-06	691218
rs1187329	9:87289280	NTRK2	A/G	0.4302	-0.0077	0.0017	9.1e-06	691969
rs17060460	6:100827834	SIM1	A/G	0.7754	-0.0091	0.0021	9.1e-06	687333
rs2138791	2:63654724	WDPCP	C/G	0.4106	-0.0077	0.0017	9.1e-06	690093
rs1547226	6:57057183	RAB23	T/C	0.18	0.0102	0.0023	9.3e-06	685694
rs3818717	17:17707105	RAI1	T/C	0.4259	-0.0078	0.0018	9.4e-06	683243
rs262536	2:63906926	WDPCP	T/C	0.2719	0.0085	0.0019	9.5e-06	689577
rs4671522	2:63844917	WDPCP	A/C	0.7554	0.0088	0.002	9.6e-06	691287
rs6741817	2:63602975	WDPCP	A/G	0.3051	0.0083	0.0019	9.6e-06	690367
rs1857414	9:87262503	NTRK2	A/G	0.431	-0.0077	0.0017	9.7e-06	688960
rs3778038	6:100841229	SIM1	T/G	0.3517	0.008	0.0018	9.7e-06	679914
rs2178678	2:63646009	WDPCP	A/T	0.5892	0.0077	0.0017	9.9e-06	690298
rs692892	11:66348503	BBS1	T/C	0.5158	0.0076	0.0017	1e-05	691755
rs7927728	11:27667472	BDNF	A/G	0.05794	0.015	0.0034	1e-05	783103
rs2802727	1:243483326	SDCCAG8	T/C	0.843	0.0106	0.0024	1e-05	691230
rs5995529	22:38415721	SOX10	T/C	0.5804	-0.0077	0.0018	1e-05	688626
rs262527	2:63900292	WDPCP	C/G	0.728	-0.0081	0.0018	1e-05	783560
rs12493471	3:45951678	LZTFL1	T/C	0.3534	-0.0081	0.0018	1.1e-05	672985
rs1722793	15:23949665	NDN	T/C	0.6207	-0.0081	0.0018	1.1e-05	672339
rs12945601	17:17653411	RAI1	T/C	0.4004	-0.0078	0.0018	1.1e-05	685392
rs10926986	1:243467611	SDCCAG8	T/G	0.1567	-0.0105	0.0024	1.1e-05	691322
rs1568174	2:63625608	WDPCP	A/C	0.5814	0.0076	0.0017	1.1e-05	691396
rs262528	2:63903367	WDPCP	T/C	0.728	-0.0085	0.0019	1.1e-05	691815
rs6546003	2:63625819	WDPCP	T/C	0.4183	-0.0076	0.0017	1.1e-05	691433
rs726433	9:87247336	NTRK2	T/C	0.1085	-0.0122	0.0028	1.2e-05	691759
rs10926984	1:243462153	SDCCAG8	T/G	0.8434	0.0105	0.0024	1.2e-05	691232
rs12470121	2:63633443	WDPCP	A/G	0.4187	-0.0071	0.0016	1.2e-05	795505
rs6736411	2:63674060	WDPCP	A/G	0.714	-0.0085	0.0019	1.2e-05	670097
rs17087472	9:87246051	NTRK2	A/G	0.8903	0.0121	0.0028	1.3e-05	691735
rs7468983	9:87247277	NTRK2	T/C	0.1085	-0.0122	0.0028	1.3e-05	691785
rs5756853	22:38329524	SOX10	A/G	0.3714	0.0079	0.0018	1.3e-05	690306
rs11140706	9:87248648	NTRK2	A/C	0.5508	0.0075	0.0017	1.4e-05	692552
rs1187367	9:87256030	NTRK2	T/C	0.4487	-0.0075	0.0017	1.4e-05	691491
rs2901581	2:63630117	WDPCP	T/C	0.5848	0.0075	0.0017	1.4e-05	691757
rs1815739	11:66328095	BBS1	T/C	0.4401	0.0077	0.0018	1.5e-05	643484
rs1837305	9:87247694	NTRK2	A/G	0.1085	-0.0121	0.0028	1.5e-05	691824
rs2072859	22:38322350	SOX10	T/C	0.3894	0.0077	0.0018	1.5e-05	690430
rs12470478	2:63769308	WDPCP	A/G	0.2389	-0.0086	0.002	1.5e-05	691012
rs8135284	22:37182681	IFT27	T/C	0.7284	0.0085	0.002	1.6e-05	689272
rs1471962	3:45949187	LZTFL1	C/G	0.1722	0.0102	0.0024	1.6e-05	664262
rs1147198	9:87275348	NTRK2	T/G	0.7703	0.0087	0.002	1.6e-05	692431
rs6559823	9:87348215	NTRK2	A/G	0.2598	-0.0085	0.002	1.6e-05	691209
rs12140431	1:243596284	SDCCAG8	A/G	0.1524	-0.0105	0.0024	1.6e-05	770204
rs1881235	11:8103991	TUB	A/G	0.96761	-0.0191	0.0044	1.6e-05	677528
rs2278718	2:63815801	WDPCP	A/C	0.7535	0.0085	0.002	1.6e-05	692439
rs1332893	9:87250808	NTRK2	C/G	0.8918	0.012	0.0028	1.7e-05	691644
rs17347542	9:87238243	NTRK2	T/C	0.2467	-0.0087	0.002	1.7e-05	688426
rs11649804	17:17696755	RAI1	A/C	0.3032	-0.0082	0.0019	1.7e-05	692243
rs2421862	2:63401973	WDPCP	A/G	0.2127	0.009	0.0021	1.7e-05	689633
rs6909828	6:100812678	SIM1	T/C	0.91914	-0.0136	0.0032	1.8e-05	690110
rs11950813	5:42742905	GHR	A/G	0.2772	0.0082	0.0019	1.9e-05	692150
rs12518414	5:42722078	GHR	A/G	0.2771	0.0082	0.0019	1.9e-05	692079
rs1187327	9:87288540	NTRK2	T/C	0.4305	-0.0074	0.0017	1.9e-05	692294
rs6116750	20:5303842	PROKR2	T/C	0.5744	0.0076	0.0018	1.9e-05	678450
rs12119001	1:243601935	SDCCAG8	T/C	0.1679	-0.0098	0.0023	1.9e-05	692214
rs10496102	2:63731239	WDPCP	T/C	0.7539	0.0085	0.002	1.9e-05	691306
rs1356390	2:63669625	WDPCP	T/C	0.2859	0.0083	0.0019	1.9e-05	669854
rs6545977	2:63301164	WDPCP	A/G	0.4875	-0.0073	0.0017	1.9e-05	692527
rs6546005	2:63672071	WDPCP	A/G	0.7152	-0.0083	0.0019	1.9e-05	670242
rs12049124	1:243598993	SDCCAG8	T/C	0.1714	-0.0098	0.0023	2e-05	691556
rs2783963	1:243501583	SDCCAG8	A/G	0.1589	-0.0107	0.0025	2e-05	684717
rs1187363	9:87337920	NTRK2	T/C	0.1715	-0.01	0.0023	2.1e-05	686514
rs17087470	9:87240311	NTRK2	T/C	0.8915	0.0119	0.0028	2.1e-05	690743
rs985542	9:87251245	NTRK2	C/G	0.5537	0.0073	0.0017	2.1e-05	691880
rs985543	9:87251183	NTRK2	A/G	0.5538	0.0073	0.0017	2.1e-05	691867
rs6685276	1:243603132	SDCCAG8	A/G	0.8313	0.0098	0.0023	2.1e-05	692173
rs3798513	6:100852179	SIM1	A/C	0.92031	-0.0134	0.0032	2.1e-05	680262
rs6741298	2:63926197	WDPCP	T/C	0.5447	-0.0073	0.0017	2.1e-05	687925
rs7717863	5:42741757	GHR	A/G	0.7226	-0.0081	0.0019	2.2e-05	692148
rs3817588	2:27731212	IFT172	T/C	0.8061	-0.0089	0.0021	2.2e-05	783398
rs1443440	9:87406168	NTRK2	T/C	0.7356	0.0085	0.002	2.2e-05	675053
rs1662696	9:87396495	NTRK2	T/C	0.2581	-0.0085	0.002	2.2e-05	682377
rs7568224	2:63390996	WDPCP	A/G	0.7861	-0.0089	0.0021	2.2e-05	688158
rs10116453	9:87363201	NTRK2	A/T	0.2598	-0.0084	0.002	2.3e-05	689871
rs1147193	9:87272615	NTRK2	T/C	0.7708	0.0086	0.002	2.3e-05	692375
rs1307279	9:87281307	NTRK2	T/C	0.765	0.0086	0.002	2.3e-05	691281
rs2295595	6:100834063	SIM1	C/G	0.08062	0.0133	0.0031	2.3e-05	691302
rs4671501	2:63631889	WDPCP	A/C	0.5805	0.0075	0.0018	2.3e-05	637342
rs7725961	5:42723965	GHR	A/G	0.7229	-0.0081	0.0019	2.4e-05	691602
rs13290917	9:87321367	NTRK2	A/G	0.03543	0.0208	0.0049	2.4e-05	666243
rs6702982	1:243608667	SDCCAG8	A/G	0.8258	0.0097	0.0023	2.4e-05	691915
rs3798515	6:100839294	SIM1	T/C	0.91926	-0.0132	0.0031	2.4e-05	691526
rs1881837	15:93465187	CHD2	A/G	0.8336	-0.0099	0.0023	2.5e-05	690734
rs3026629	22:38329285	SOX10	A/G	0.3502	0.0077	0.0018	2.5e-05	690467
rs2263636	2:63495365	WDPCP	A/C	0.2765	0.0087	0.0021	2.5e-05	531425
rs7652331	3:45962752	LZTFL1	T/C	0.3462	-0.0075	0.0018	2.6e-05	691348
rs139905	22:38409596	SOX10	A/G	0.4269	0.0073	0.0017	2.6e-05	690105
rs2292793	2:63661280	WDPCP	A/G	0.2842	0.0077	0.0018	2.6e-05	768899
rs7174740	15:93531714	CHD2	T/C	0.7467	-0.0084	0.002	2.7e-05	690217
rs6665625	1:243608833	SDCCAG8	C/G	0.1721	-0.0096	0.0023	2.7e-05	680446
rs12713497	2:63926545	WDPCP	T/C	0.4551	0.0072	0.0017	2.7e-05	688238
rs4671528	2:63924709	WDPCP	T/G	0.5434	-0.0073	0.0017	2.7e-05	684349
rs12479894	20:57442694	GNAS	A/G	0.97205	-0.0218	0.0052	2.8e-05	689394
rs13002109	2:63346702	WDPCP	A/C	0.5112	-0.0072	0.0017	2.8e-05	684186
rs17408652	2:63390490	WDPCP	T/G	0.7846	-0.0088	0.0021	2.8e-05	688089
rs6741584	2:63926459	WDPCP	T/C	0.5449	-0.0072	0.0017	2.8e-05	688261
rs1406713	15:93461263	CHD2	C/G	0.1957	0.0092	0.0022	2.9e-05	688196
rs8180482	5:42765986	GHR	A/C	0.2746	0.008	0.0019	2.9e-05	691994
rs2531748	3:45819837	LZTFL1	A/G	0.6601	-0.0079	0.0019	2.9e-05	668052
rs139859	22:38341134	SOX10	T/C	0.3509	0.0076	0.0018	2.9e-05	691053
rs13431765	2:63417729	WDPCP	T/G	0.7721	-0.0085	0.002	2.9e-05	691629
rs7605319	2:63423495	WDPCP	T/C	0.2132	0.0087	0.0021	2.9e-05	691630
rs7608470	2:63691478	WDPCP	T/C	0.2846	0.0081	0.0019	3e-05	669875
rs4821995	22:41461836	EP300	A/G	0.3388	-0.0076	0.0018	3.1e-05	690168
rs3800018	6:57069606	RAB23	T/C	0.8528	-0.0102	0.0024	3.1e-05	688749
rs4623938	11:8109415	TUB	T/C	0.03221	0.0186	0.0045	3.1e-05	678267
rs17619354	2:63919765	WDPCP	A/G	0.2544	-0.0082	0.002	3.1e-05	684992
rs2053359	15:93540997	CHD2	T/C	0.7444	-0.0083	0.002	3.2e-05	690543
rs12054838	5:42750177	GHR	T/C	0.7228	-0.008	0.0019	3.2e-05	691797
rs12055266	5:42769647	GHR	T/C	0.7254	-0.008	0.0019	3.2e-05	691990
rs7734918	5:42768180	GHR	A/T	0.7254	-0.008	0.0019	3.2e-05	691989
rs1659409	9:87318287	NTRK2	A/G	0.4867	-0.0071	0.0017	3.2e-05	690914
rs6546023	2:63919883	WDPCP	T/C	0.743	0.0082	0.002	3.3e-05	685043
rs11074121	15:93521604	CHD2	A/G	0.1705	0.0096	0.0023	3.4e-05	690102
rs3798500	6:100862427	SIM1	T/C	0.91879	-0.013	0.0031	3.4e-05	692154
rs1540858	11:8105759	TUB	A/G	0.96428	-0.0183	0.0044	3.4e-05	672550
rs262494	2:63845484	WDPCP	A/G	0.7468	-0.0082	0.002	3.4e-05	689060
rs6497012	15:93519107	CHD2	C/G	0.1705	0.0096	0.0023	3.6e-05	690100
rs139883	22:38369027	SOX10	T/C	0.6266	-0.0074	0.0018	3.6e-05	692028
rs17554675	2:63919971	WDPCP	A/G	0.2536	-0.0081	0.002	3.6e-05	685027
rs4567921	2:63847114	WDPCP	A/G	0.244	-0.0089	0.0021	3.6e-05	528346
rs139887	22:38371396	SOX10	C/G	0.6266	-0.0073	0.0018	3.7e-05	691849
rs10203263	2:63454401	WDPCP	A/C	0.2267	0.0084	0.002	3.7e-05	692415
rs12900461	15:93552656	CHD2	T/C	0.8283	-0.0095	0.0023	3.8e-05	692407
rs2033847	15:93545831	CHD2	T/G	0.8292	-0.0096	0.0023	3.8e-05	691394
rs1364024	5:42724913	GHR	T/C	0.7224	-0.0081	0.002	3.8e-05	682760
rs2009667	22:37171611	IFT27	A/G	0.4495	-0.0074	0.0018	3.8e-05	674064
rs4244601	17:17625318	RAI1	A/G	0.1359	-0.0103	0.0025	3.8e-05	795255
rs11074122	15:93521651	CHD2	T/G	0.171	0.0096	0.0023	3.9e-05	690102
rs12915582	15:93552330	CHD2	T/C	0.8288	-0.0095	0.0023	3.9e-05	691945
rs2272458	15:93527843	CHD2	A/G	0.7442	-0.0082	0.002	3.9e-05	690231
rs1439047	9:87327918	NTRK2	A/G	0.4913	-0.0071	0.0017	3.9e-05	691096
rs4877880	9:87392708	NTRK2	A/G	0.2616	-0.0081	0.002	3.9e-05	685859
rs720856	17:17645951	RAI1	C/G	0.7554	0.0086	0.0021	3.9e-05	684368
rs139866	22:38354684	SOX10	T/C	0.6284	-0.0073	0.0018	3.9e-05	691630
rs10486527	7:33380673	BBS9	T/C	0.6938	0.0073	0.0018	4e-05	792113
rs1470071	15:93506792	CHD2	T/C	0.1669	0.0096	0.0023	4e-05	689475
rs7173849	15:93542000	CHD2	C/G	0.1708	0.0095	0.0023	4e-05	691304
rs1778929	9:87322540	NTRK2	T/C	0.4868	-0.0071	0.0017	4e-05	691103
rs2579371	9:87334068	NTRK2	T/C	0.5087	0.0071	0.0017	4.1e-05	689520
rs11868035	17:17715101	RAI1	A/G	0.3044	-0.0078	0.0019	4.1e-05	684920
rs17060534	6:100862051	SIM1	A/G	0.08536	0.0128	0.0031	4.1e-05	692180
rs7182854	15:73079504	BBS4	A/G	0.1072	-0.0115	0.0028	4.2e-05	687480
rs6026563	20:57433342	GNAS	A/G	0.97159	-0.0212	0.0052	4.2e-05	683958
rs10767653	11:27638290	BDNF	A/G	0.5899	0.0072	0.0018	4.3e-05	689094
rs1025768	15:93517214	CHD2	A/G	0.8289	-0.0095	0.0023	4.3e-05	690003
rs16888392	6:57076552	RAB23	A/G	0.1455	0.01	0.0024	4.4e-05	680749
rs7747929	6:100871488	SIM1	T/C	0.6668	-0.0075	0.0018	4.4e-05	690774
rs1371391	15:93551800	CHD2	A/G	0.8288	-0.0094	0.0023	4.5e-05	691534
rs139898	22:38399979	SOX10	A/G	0.3782	0.0073	0.0018	4.6e-05	690556
rs11074124	15:93536666	CHD2	A/G	0.747	-0.0081	0.002	4.8e-05	690279
rs11856160	15:93452846	CHD2	A/G	0.8406	-0.0097	0.0024	4.8e-05	686463
rs4821992	22:41443075	EP300	T/C	0.2288	-0.0084	0.0021	4.9e-05	690255
rs10081630	9:87328898	NTRK2	A/T	0.03455	0.0187	0.0046	4.9e-05	691161
rs1187326	9:87285915	NTRK2	T/C	0.772	0.0085	0.0021	4.9e-05	637456
rs13417792	2:63447200	WDPCP	T/G	0.213	0.0085	0.0021	4.9e-05	690908
rs196123	2:63841712	WDPCP	T/C	0.2527	0.008	0.002	4.9e-05	689781
rs139879	22:38364552	SOX10	T/C	0.371	0.0072	0.0018	5e-05	692544
rs1138908	12:49402299	KMT2D	C/G	0.3955	0.0078	0.0019	5.1e-05	527852
rs4403617	1:243611266	SDCCAG8	A/G	0.1626	-0.0098	0.0024	5.1e-05	674649
rs4813744	20:5341009	PROKR2	T/C	0.4444	-0.007	0.0017	5.2e-05	685728
rs139865	22:38353932	SOX10	C/G	0.3717	0.0073	0.0018	5.3e-05	691184
rs139891	22:38387914	SOX10	T/G	0.6214	-0.0072	0.0018	5.3e-05	691379
rs7171728	15:73050820	BBS4	C/G	0.7609	0.0082	0.002	5.4e-05	691243
rs728633	11:27781979	BDNF	A/G	0.7696	-0.0083	0.0021	5.4e-05	679684
rs6441934	3:45962802	LZTFL1	T/C	0.208	-0.0086	0.0021	5.4e-05	688033
rs17087704	9:87405751	NTRK2	A/T	0.96428	-0.0188	0.0047	5.4e-05	674616
rs1778934	9:87324622	NTRK2	A/G	0.5081	0.0069	0.0017	5.5e-05	691011
rs4777534	15:73050222	BBS4	T/C	0.2392	-0.0081	0.002	5.6e-05	691195
rs11656775	17:17654319	RAI1	A/G	0.3268	-0.0071	0.0018	5.6e-05	788532
rs139884	22:38369976	SOX10	A/G	0.3712	0.0072	0.0018	5.6e-05	691965
rs11639256	15:93528473	CHD2	T/C	0.2529	0.0081	0.002	5.7e-05	684246
rs11789677	9:87238610	NTRK2	A/G	0.7531	0.0077	0.0019	5.7e-05	791569
rs1881237	11:8110479	TUB	A/G	0.96574	-0.0177	0.0044	5.7e-05	678144
rs16957297	15:73079208	BBS4	A/G	0.1062	-0.0114	0.0028	5.8e-05	686652
rs1439620	15:93429646	CHD2	A/G	0.319	0.0071	0.0018	5.8e-05	789595
rs2047101	12:49497643	KMT2D	A/T	0.3424	0.0076	0.0019	5.9e-05	636497
rs2279596	12:49498751	KMT2D	A/G	0.344	0.0076	0.0019	5.9e-05	636530
rs6497014	15:93544696	CHD2	T/C	0.2528	0.008	0.002	6e-05	690523
rs7717985	5:42741635	GHR	A/G	0.3005	0.0076	0.0019	6e-05	692053
rs13293362	9:87325380	NTRK2	T/C	0.0335	0.0187	0.0047	6e-05	690670
rs7180285	15:93499385	CHD2	A/G	0.1659	0.0094	0.0023	6.1e-05	689075
rs6883543	5:42742513	GHR	A/G	0.3005	0.0076	0.0019	6.1e-05	692038
rs2191030	3:45910946	LZTFL1	T/C	0.2246	-0.0084	0.0021	6.1e-05	677073
rs6026562	20:57432211	GNAS	T/C	0.97159	-0.0207	0.0052	6.2e-05	684105
rs3798504	6:100858936	SIM1	A/T	0.91949	-0.0126	0.0031	6.5e-05	680473
rs1971456	20:5304961	PROKR2	T/C	0.4282	-0.0071	0.0018	6.6e-05	674843
rs6076821	20:5343641	PROKR2	T/C	0.445	-0.0069	0.0017	6.8e-05	691563
rs4777755	15:93510603	CHD2	A/G	0.1698	0.0093	0.0023	7e-05	689339
rs4866949	5:42718422	GHR	T/C	0.6995	-0.0075	0.0019	7e-05	691956
rs7708223	5:42723898	GHR	T/C	0.6996	-0.0075	0.0019	7.1e-05	691944
rs2123010	5:36921325	NIPBL	T/C	0.8738	0.0105	0.0026	7.1e-05	691443
rs139893	22:38393608	SOX10	A/G	0.6235	-0.0071	0.0018	7.2e-05	690515
rs1488373	3:45957689	LZTFL1	T/C	0.7514	0.0078	0.002	7.3e-05	692263
rs12900800	15:93512678	CHD2	A/G	0.7508	-0.008	0.002	7.4e-05	688611
rs13293356	9:87333948	NTRK2	A/T	0.9665	-0.0185	0.0047	7.4e-05	690606
rs4877286	9:87343940	NTRK2	A/G	0.03397	0.0186	0.0047	7.4e-05	688615
rs3798498	6:100878267	SIM1	T/C	0.6034	0.0071	0.0018	7.4e-05	679561
rs328300	8:38344499	FGFR1	T/G	0.5157	0.0069	0.0017	7.5e-05	680608
rs13422328	2:63466177	WDPCP	A/C	0.7715	-0.0081	0.0021	7.5e-05	690922
rs262491	2:63841113	WDPCP	T/C	0.2526	0.0078	0.002	7.7e-05	683222
rs12233949	5:42607461	GHR	C/G	0.2946	0.0072	0.0018	7.8e-05	783117
rs7725776	5:42723756	GHR	T/C	0.3004	0.0074	0.0019	7.8e-05	691938
rs6516026	20:5344112	PROKR2	T/C	0.4456	-0.0069	0.0017	7.9e-05	691985
rs3734357	6:100868492	SIM1	A/T	0.6587	-0.0072	0.0018	7.9e-05	690621
rs11041737	11:8111853	TUB	A/G	0.02941	0.0179	0.0045	7.9e-05	671605
rs17618390	2:63831325	WDPCP	C/G	0.731	0.0076	0.0019	7.9e-05	692112
rs17087580	9:87347756	NTRK2	T/C	0.96399	-0.0183	0.0046	8e-05	688951
rs1889018	17:17734740	RAI1	A/G	0.632	0.0071	0.0018	8e-05	686288
rs12187996	5:42717610	GHR	T/C	0.3004	0.0074	0.0019	8.1e-05	691509
rs13292278	9:87248912	NTRK2	T/C	0.03309	0.0186	0.0047	8.3e-05	675278
rs4140424	20:5341923	PROKR2	T/C	0.4454	-0.0068	0.0017	8.3e-05	692370
rs1346165	15:73077953	BBS4	A/G	0.1061	-0.0111	0.0028	8.5e-05	686966
rs2579372	9:87259620	NTRK2	A/G	0.5636	0.0074	0.0019	8.6e-05	531038
rs139897	22:38399098	SOX10	A/G	0.3766	0.007	0.0018	8.6e-05	690577
rs3778035	6:100868009	SIM1	T/C	0.92002	-0.0122	0.0031	8.9e-05	691258
rs4671509	2:63686004	WDPCP	A/G	0.7156	-0.0082	0.0021	8.9e-05	512952
rs3945967	20:57368350	GNAS	A/G	0.03128	0.0195	0.005	9e-05	683805
rs9810934	3:45954352	LZTFL1	A/G	0.2454	-0.0078	0.002	9e-05	692542
rs139892	22:38388203	SOX10	A/G	0.623	-0.007	0.0018	9.1e-05	691649
rs2168274	2:63918988	WDPCP	A/T	0.5457	-0.0068	0.0017	9.1e-05	681726
rs9902941	17:17733760	RAI1	T/C	0.6338	0.0071	0.0018	9.2e-05	686045
rs4866797	5:42747348	GHR	T/G	0.6995	-0.0074	0.0019	9.3e-05	691745
rs139895	22:38397034	SOX10	A/G	0.623	-0.007	0.0018	9.3e-05	690879
rs11950811	5:42742897	GHR	T/G	0.3005	0.0082	0.0021	9.4e-05	656634
rs11957181	5:42746556	GHR	T/C	0.6995	-0.0074	0.0019	9.6e-05	691747
rs6076820	20:5343487	PROKR2	A/G	0.4456	-0.0068	0.0017	9.6e-05	692198
rs84770	22:38390128	SOX10	T/G	0.3766	0.0069	0.0018	9.6e-05	691034
rs6076823	20:5343852	PROKR2	A/G	0.4456	-0.0068	0.0017	9.7e-05	692131
rs6718609	2:63459809	WDPCP	T/G	0.7722	-0.008	0.0021	9.7e-05	691179
rs12187466	5:42751797	GHR	T/C	0.7016	-0.0073	0.0019	9.8e-05	691675
rs4866954	5:42747162	GHR	T/C	0.6995	-0.0074	0.0019	9.8e-05	691721
rs7618618	3:45963497	LZTFL1	T/G	0.7595	0.0077	0.002	9.8e-05	685541
rs6076819	20:5343423	PROKR2	A/G	0.4456	-0.0068	0.0017	9.9e-05	692275
rs7153778	14:89252165	TTC8	C/G	0.2494	0.0078	0.002	9.9e-05	687787
rs1860601	7:33484507	BBS9	T/G	0.7423	0.0077	0.002	0.0001	688358
rs11953691	5:42746426	GHR	T/C	0.3004	0.0073	0.0019	0.0001	691758
rs12055087	5:42769632	GHR	A/C	0.2976	0.0073	0.0019	0.0001	691859
rs4242120	5:42747537	GHR	A/G	0.6995	-0.0073	0.0019	0.0001	691742
rs4242121	5:42747662	GHR	A/G	0.6995	-0.0073	0.0019	0.0001	691741
rs1532070	3:45970842	LZTFL1	C/G	0.755	0.0077	0.002	0.0001	691547
rs6764244	3:45994510	LZTFL1	A/T	0.2442	-0.0077	0.002	0.0001	691777
rs11654081	17:17708129	RAI1	T/C	0.3651	-0.0071	0.0018	0.0001	685547
rs17408841	2:63397974	WDPCP	A/G	0.7732	-0.0079	0.002	0.0001	688381
rs8026638	15:93511848	CHD2	T/C	0.1669	0.0094	0.0024	0.00011	676880
rs10093843	8:38334038	FGFR1	T/C	0.1362	-0.0099	0.0026	0.00011	688796
rs7012413	8:38317398	FGFR1	T/C	0.3045	0.0073	0.0019	0.00011	692573
rs10941586	5:42749123	GHR	A/G	0.6995	-0.0073	0.0019	0.00011	691716
rs3797311	5:42757179	GHR	A/G	0.7024	-0.0073	0.0019	0.00011	691667
rs4866796	5:42744895	GHR	A/G	0.3004	0.0073	0.0019	0.00011	691696
rs6899268	5:42771825	GHR	T/G	0.7024	-0.0073	0.0019	0.00011	691838
rs722678	5:42748122	GHR	T/C	0.3005	0.0073	0.0019	0.00011	691736
rs6026540	20:57391435	GNAS	A/G	0.9703	-0.0194	0.005	0.00011	689473
rs7634640	3:45982119	LZTFL1	T/C	0.2526	-0.0076	0.002	0.00011	691687
rs10512153	9:87371365	NTRK2	T/G	0.03397	0.0183	0.0047	0.00011	686551
rs7039299	9:87350878	NTRK2	A/G	0.96387	-0.0179	0.0046	0.00011	688964
rs9899634	17:17727943	RAI1	A/T	0.6335	0.007	0.0018	0.00011	685631
rs8031691	15:73064927	BBS4	A/G	0.8902	0.0107	0.0028	0.00012	691080
rs2910871	5:42734622	GHR	A/C	0.3114	0.0072	0.0019	0.00012	691851
rs7268107	20:5340331	PROKR2	A/G	0.5536	0.0067	0.0017	0.00012	690265
rs241816	6:100879651	SIM1	T/C	0.6525	0.007	0.0018	0.00012	691277
rs262534	2:63906375	WDPCP	A/T	0.3354	0.007	0.0018	0.00012	691231
rs11982012	7:33377472	BBS9	T/C	0.6926	0.0072	0.0019	0.00013	688536
rs1862628	5:42723128	GHR	T/C	0.6879	-0.0072	0.0019	0.00013	691937
rs6015373	20:57373368	GNAS	T/C	0.9703	-0.0193	0.005	0.00013	688598
rs6015381	20:57393614	GNAS	C/G	0.02941	0.0194	0.0051	0.00013	688857
rs6026538	20:57389420	GNAS	T/C	0.97036	-0.0192	0.005	0.00013	689441
rs7130	3:45959515	LZTFL1	A/T	0.2419	-0.0076	0.002	0.00013	692173
rs12654646	5:37038232	NIPBL	T/C	0.1221	-0.0102	0.0027	0.00013	691016
rs12057045	9:87450224	NTRK2	A/T	0.7692	-0.0079	0.0021	0.00013	675550
rs17326762	9:87357451	NTRK2	T/C	0.03397	0.018	0.0047	0.00013	688473
rs4815801	20:5339666	PROKR2	T/G	0.4466	-0.0066	0.0017	0.00013	690664
rs7268162	20:5340402	PROKR2	A/G	0.5536	0.0066	0.0017	0.00013	690464
rs8066560	17:17728043	RAI1	A/G	0.364	-0.0069	0.0018	0.00013	685639
rs12713494	2:63698162	WDPCP	T/G	0.7122	-0.0074	0.0019	0.00013	669763
rs13009169	2:63405218	WDPCP	A/G	0.2837	-0.0073	0.0019	0.00013	687797
rs6462471	7:33377961	BBS9	A/G	0.3295	-0.007	0.0018	0.00014	687574
rs2973028	5:42746081	GHR	A/G	0.3114	0.0071	0.0019	0.00014	691421
rs17379500	9:87346520	NTRK2	A/C	0.03397	0.0179	0.0047	0.00014	676594
rs1891979	9:87365866	NTRK2	A/T	0.96603	-0.018	0.0047	0.00014	688455
rs3758316	9:87282568	NTRK2	A/G	0.96656	-0.0178	0.0047	0.00014	678906
rs4877881	9:87405604	NTRK2	A/C	0.96375	-0.0178	0.0047	0.00014	687703
rs1028555	20:5337541	PROKR2	T/C	0.553	0.0066	0.0017	0.00014	690849
rs6085130	20:5340447	PROKR2	T/C	0.4458	-0.0066	0.0017	0.00014	690891
rs2350976	17:17708529	RAI1	A/G	0.3701	-0.0071	0.0019	0.00014	630739
rs4925119	17:17742904	RAI1	A/G	0.3645	-0.0069	0.0018	0.00014	686554
rs12594844	15:73071007	BBS4	C/G	0.90873	0.011	0.0029	0.00015	683346
rs1345825	5:42724518	GHR	A/C	0.6883	-0.0071	0.0019	0.00015	691903
rs6026543	20:57394025	GNAS	A/G	0.03017	0.0188	0.005	0.00015	690721
rs1047444	3:45960079	LZTFL1	A/C	0.7573	0.0075	0.002	0.00015	692172
rs1488374	3:45961842	LZTFL1	T/C	0.7573	0.0075	0.002	0.00015	691958
rs12552381	9:87402990	NTRK2	T/C	0.96387	-0.0177	0.0047	0.00015	676371
rs12552425	9:87403399	NTRK2	T/C	0.96387	-0.0177	0.0047	0.00015	676368
rs12555159	9:87394832	NTRK2	A/G	0.03613	0.0176	0.0047	0.00015	676528
rs2889962	9:87362039	NTRK2	A/G	0.96375	-0.0176	0.0046	0.00015	684248
rs4925114	17:17711270	RAI1	A/G	0.3651	-0.007	0.0018	0.00015	683447
rs1121276	1:243710407	SDCCAG8	T/C	0.6553	-0.0066	0.0017	0.00015	775776
rs10168461	2:63917221	WDPCP	A/G	0.4535	0.0066	0.0017	0.00015	682769
rs17432775	2:63466463	WDPCP	T/C	0.2274	0.0078	0.0021	0.00015	690907
rs1850984	2:63464942	WDPCP	A/G	0.2275	0.0077	0.002	0.00015	691090
rs4815800	20:5339502	PROKR2	T/G	0.5534	0.0065	0.0017	0.00016	690625
rs6085126	20:5340039	PROKR2	A/G	0.4465	-0.0066	0.0017	0.00016	690702
rs881300	8:38332298	FGFR1	A/C	0.8639	0.009	0.0024	0.00017	785665
rs6026546	20:57397994	GNAS	T/C	0.97047	-0.019	0.0051	0.00017	689518
rs13292400	9:87397008	NTRK2	A/C	0.03607	0.0176	0.0047	0.00017	676407
rs17080621	9:87398104	NTRK2	A/G	0.03613	0.0176	0.0047	0.00017	676418
rs17087628	9:87386499	NTRK2	A/G	0.96363	-0.0176	0.0047	0.00017	688705
rs1778912	9:87307434	NTRK2	A/G	0.5337	0.0065	0.0017	0.00017	691059
rs4925109	17:17661802	RAI1	A/G	0.3196	-0.0071	0.0019	0.00017	685849
rs13294616	9:87267100	NTRK2	T/C	0.0335	0.0175	0.0047	0.00018	678834
rs13301454	9:87262865	NTRK2	A/C	0.03338	0.0175	0.0047	0.00018	690326
rs13027594	2:63362468	WDPCP	A/G	0.362	-0.0068	0.0018	0.00018	683256
rs12926323	16:56582548	BBS2	T/C	0.6069	0.0067	0.0018	0.00019	688412
rs12591728	15:72973268	BBS4	T/G	0.1061	-0.0106	0.0028	0.00019	681166
rs1371390	15:93496874	CHD2	T/C	0.8001	-0.0082	0.0022	0.00019	687602
rs1187350	9:87295237	NTRK2	A/G	0.5336	0.0064	0.0017	0.00019	688463
rs12555182	9:87395111	NTRK2	C/G	0.96416	-0.0174	0.0047	0.00019	688418
rs13287600	9:87395778	NTRK2	T/C	0.96416	-0.0175	0.0047	0.00019	676666
rs13292008	9:87404070	NTRK2	A/G	0.96603	-0.0177	0.0047	0.00019	687578
rs6747307	2:63922893	WDPCP	T/C	0.5609	-0.0065	0.0017	0.00019	687338
rs7829058	8:38332095	FGFR1	C/G	0.1361	-0.009	0.0024	0.0002	779773
rs12951376	17:17752809	RAI1	T/C	0.3127	-0.0067	0.0018	0.0002	791564
rs11140785	9:87466777	NTRK2	A/T	0.4627	0.0065	0.0017	0.00021	682319
rs12552902	9:87401314	NTRK2	A/G	0.96387	-0.0173	0.0047	0.00021	688096
rs1260333	2:27748624	IFT172	A/G	0.4478	-0.0064	0.0017	0.00022	691566
rs468022	5:36988252	NIPBL	A/G	0.1576	-0.009	0.0024	0.00022	691474
rs7020597	9:87396407	NTRK2	T/C	0.03613	0.0172	0.0047	0.00022	688182
rs12028447	1:243617092	SDCCAG8	T/C	0.1091	-0.0103	0.0028	0.00022	683870
rs12127169	1:243615023	SDCCAG8	T/C	0.1087	-0.0103	0.0028	0.00022	683902
rs10867041	9:140551809	EHMT1	T/C	0.1446	-0.0096	0.0026	0.00024	561206
rs2911711	2:27750546	IFT172	A/T	0.5302	0.0064	0.0017	0.00024	683949
rs4925120	17:17754633	RAI1	T/C	0.6361	0.0066	0.0018	0.00024	691079
rs941448	17:17654542	RAI1	C/G	0.3265	-0.0069	0.0019	0.00024	685446
rs11125947	2:63334101	WDPCP	T/C	0.3196	-0.0069	0.0019	0.00024	684141
rs7162166	15:72988040	BBS4	A/C	0.8915	0.0103	0.0028	0.00025	687298
rs3183702	17:17747289	RAI1	A/G	0.3693	-0.0066	0.0018	0.00025	691463
rs9382686	6:57027144	RAB23	T/C	0.91365	0.0115	0.0032	0.00026	692543
rs1052299	17:17750419	RAI1	A/G	0.365	-0.0066	0.0018	0.00026	691763
rs11656665	17:17724789	RAI1	A/G	0.6245	0.0067	0.0018	0.00026	683385
rs2236513	17:17747366	RAI1	A/C	0.3637	-0.0066	0.0018	0.00026	691740
rs12464471	2:63686428	WDPCP	A/G	0.783	0.0075	0.0021	0.00026	685600
rs1590142	7:33122183	BBS9	T/C	0.2816	-0.007	0.0019	0.00027	677873
rs12447449	16:3880659	CREBBP	A/G	0.96825	-0.0162	0.0045	0.00027	589160
rs13287010	9:87396208	NTRK2	A/C	0.96416	-0.017	0.0047	0.00027	688339
rs1556245	6:57022958	RAB23	A/G	0.0863	-0.0115	0.0032	0.00027	692546
rs7771328	6:57019184	RAB23	A/G	0.0863	-0.0115	0.0032	0.00027	692529
rs1108648	17:17750558	RAI1	A/G	0.6335	0.0066	0.0018	0.00027	691637
rs2297508	17:17715317	RAI1	C/G	0.3667	-0.0067	0.0018	0.00027	684132
rs1025743	9:87315117	NTRK2	T/C	0.4753	-0.0063	0.0017	0.00028	686931
rs7749960	6:57045556	RAB23	A/C	0.08635	-0.0115	0.0032	0.00028	692596
rs9349845	6:57041124	RAB23	T/C	0.91359	0.0115	0.0032	0.00028	692585
rs9357940	6:57059820	RAB23	T/G	0.91318	0.0115	0.0032	0.00028	691911
rs16960744	17:17755259	RAI1	A/G	0.3614	-0.0065	0.0018	0.00028	691103
rs976529	1:243471462	SDCCAG8	T/C	0.03309	-0.0177	0.0049	0.00028	678582
rs1545985	3:46005478	LZTFL1	A/G	0.631	0.0064	0.0018	0.00029	686025
rs13289538	9:87400217	NTRK2	A/G	0.96305	-0.0169	0.0047	0.00029	688270
rs7855888	9:87452058	NTRK2	T/C	0.7498	-0.0073	0.002	0.00029	674074
rs9370567	6:57038369	RAB23	A/C	0.91382	0.0115	0.0032	0.00029	692572
rs9475788	6:57057219	RAB23	A/G	0.91376	0.0115	0.0032	0.00029	692505
rs7146379	14:89249467	TTC8	T/C	0.1157	0.0096	0.0026	0.00029	692127
rs10927022	1:243618064	SDCCAG8	A/G	0.1142	-0.01	0.0028	0.00031	671469
rs9296862	6:57051017	RAB23	A/G	0.91411	0.0114	0.0032	0.00032	692168
rs10152428	15:93510243	CHD2	C/G	0.7253	-0.007	0.002	0.00033	688875
rs292181	5:36952576	NIPBL	T/C	0.1651	-0.0084	0.0023	0.00033	691946
rs10114941	9:87443528	NTRK2	C/G	0.04063	0.0161	0.0045	0.00033	677566
rs7501812	17:17750907	RAI1	A/G	0.629	0.0065	0.0018	0.00033	686170
rs158794	5:36883088	NIPBL	T/G	0.1621	-0.0086	0.0024	0.00034	691868
rs1002996	6:57022596	RAB23	A/G	0.91335	0.0113	0.0032	0.00034	692540
rs1040461	6:57055354	RAB23	T/C	0.0863	-0.0113	0.0032	0.00034	692606
rs3744115	17:17749822	RAI1	A/G	0.6349	0.0064	0.0018	0.00034	692567
rs746270	2:170430035	BBS5	A/G	0.96784	0.0176	0.0049	0.00035	691324
rs4778061	15:93501398	CHD2	A/T	0.7378	-0.007	0.002	0.00035	681203
rs12898814	15:73030536	BBS4	T/G	0.1126	-0.01	0.0028	0.00036	690275
rs292179	5:36947613	NIPBL	A/G	0.8303	0.0083	0.0023	0.00037	691995
rs292186	5:36967422	NIPBL	T/C	0.165	-0.0084	0.0023	0.00037	691878
rs11140783	9:87454817	NTRK2	T/C	0.08483	0.0112	0.0031	0.00037	692606
rs13284421	9:87338999	NTRK2	A/G	0.03438	0.0164	0.0046	0.00037	679424
rs9464419	6:57021010	RAB23	C/G	0.08635	-0.0112	0.0032	0.00037	692448
rs12127073	1:243614705	SDCCAG8	C/G	0.8873	0.0098	0.0028	0.00038	683659
rs151946	5:36884166	NIPBL	A/G	0.8423	0.0085	0.0024	0.00039	691881
rs293774	5:36943268	NIPBL	A/G	0.1611	-0.0084	0.0024	0.00039	692296
rs4917576	10:112299896	SMC3	A/T	0.1027	-0.0102	0.0029	0.0004	670536
rs6026592	20:57477211	GNAS	A/G	0.3714	0.0066	0.0019	0.00042	663804
rs158789	5:36835057	NIPBL	C/G	0.8366	0.0083	0.0023	0.00042	691634
rs158793	5:36885090	NIPBL	A/G	0.158	-0.0084	0.0024	0.00042	691885
rs292196	5:36914179	NIPBL	T/C	0.1655	-0.0083	0.0023	0.00042	692275
rs6128461	20:57477090	GNAS	T/C	0.3723	0.0065	0.0018	0.00044	669454
rs151945	5:36838596	NIPBL	T/C	0.1633	-0.0083	0.0024	0.00044	691714
rs12338909	9:87581059	NTRK2	T/G	0.08197	-0.0114	0.0032	0.00044	682887
rs10803143	1:243615589	SDCCAG8	T/C	0.2629	-0.0069	0.002	0.00044	682829
rs17114996	15:25245502	SNURF	A/G	0.02081	0.0211	0.006	0.00044	688745
rs6123832	20:57418071	GNAS	T/C	0.359	-0.0064	0.0018	0.00045	692528
rs245587	5:36839547	NIPBL	C/G	0.8367	0.0082	0.0024	0.00046	691707
rs158797	5:36870420	NIPBL	T/G	0.8347	0.0082	0.0024	0.00047	691840
rs292160	5:36896073	NIPBL	T/G	0.8355	0.0082	0.0023	0.00047	692226
rs294695	5:36986688	NIPBL	T/C	0.8358	0.0082	0.0023	0.00048	691740
rs10868229	9:87463562	NTRK2	A/G	0.501	0.006	0.0017	0.00048	736391
rs7870666	9:87449460	NTRK2	A/T	0.7616	-0.0072	0.0021	0.00048	674771
rs4924823	17:17764502	RAI1	A/G	0.3644	-0.0063	0.0018	0.00048	691193
rs16903459	5:37031416	NIPBL	A/G	0.8393	0.0083	0.0024	0.00049	690911
rs11140780	9:87452780	NTRK2	A/G	0.91558	-0.0111	0.0032	0.0005	687068
rs12056959	9:87449073	NTRK2	C/G	0.08594	0.0112	0.0032	0.0005	673788
rs181755	5:36839264	NIPBL	A/G	0.1633	-0.0082	0.0024	0.00051	691704
rs2490400	1:243492643	SDCCAG8	T/C	0.7629	0.0072	0.0021	0.00051	646058
rs12993804	2:63494689	WDPCP	A/T	0.2896	-0.0066	0.0019	0.00052	689458
rs17087753	9:87450180	NTRK2	T/C	0.91441	-0.011	0.0032	0.00053	682564
rs8079321	17:17760789	RAI1	T/C	0.3644	-0.0062	0.0018	0.00053	691180
rs17114992	15:25244140	SNURF	T/G	0.02157	0.0214	0.0062	0.00053	674160
rs7825208	8:38327287	FGFR1	A/G	0.8782	0.0091	0.0026	0.00055	691670
rs11628445	14:89247319	TTC8	T/G	0.8792	-0.0089	0.0026	0.00055	692073
rs5995341	22:37161320	IFT27	T/C	0.06478	-0.0121	0.0035	0.00056	683460
rs10206947	2:63425505	WDPCP	A/G	0.1892	0.0076	0.0022	0.00057	689914
rs4777536	15:73056329	BBS4	A/G	0.7608	0.0076	0.0022	0.00058	521602
rs293746	5:36895270	NIPBL	A/G	0.834	0.0081	0.0023	0.00058	692243
rs158410	5:36858661	NIPBL	A/T	0.8361	0.0081	0.0023	0.00059	691778
rs10512155	9:87445916	NTRK2	A/C	0.04069	0.0154	0.0045	0.0006	676809
rs972721	2:63361502	WDPCP	T/C	0.2479	-0.0065	0.0019	0.0006	788660
rs2531757	3:45850520	LZTFL1	A/C	0.3451	0.0063	0.0019	0.00061	662528
rs8010841	14:89260247	TTC8	A/G	0.8804	-0.009	0.0026	0.00063	690267
rs4877883	9:87445806	NTRK2	T/G	0.04069	0.0153	0.0045	0.00065	676907
rs11130079	3:45978473	LZTFL1	A/G	0.07302	-0.0117	0.0034	0.00067	666626
rs7600451	2:170374134	BBS5	T/G	0.03297	-0.0167	0.0049	0.00068	683423
rs850813	15:23895635	MAGEL2	A/G	0.4463	0.0062	0.0018	0.00068	637647
rs3006917	1:243641971	SDCCAG8	T/C	0.1898	-0.0074	0.0022	0.00068	687359
rs4146968	1:243423552	SDCCAG8	A/G	0.8564	0.0085	0.0025	0.00069	692061
rs17114938	15:25224917	SNURF	T/G	0.02	0.0202	0.006	0.00069	676809
rs17087481	9:87247045	NTRK2	T/C	0.8635	0.0085	0.0025	0.0007	687802
rs7271854	20:57447022	GNAS	T/C	0.3989	0.0061	0.0018	0.00072	666506
rs10280367	7:33300659	BBS9	A/T	0.94691	-0.013	0.0038	0.00074	679530
rs1800905	20:57415995	GNAS	A/G	0.3589	-0.0063	0.0019	0.00074	637594
rs12449964	17:17544704	RAI1	T/C	0.4464	0.0055	0.0016	0.00075	792570
rs17115021	15:25264380	SNURF	T/C	0.97954	-0.02	0.006	0.00077	685373
rs12891466	14:89347106	TTC8	T/C	0.8808	-0.0087	0.0026	0.00079	691422
rs6718611	2:170355378	BBS5	A/G	0.03175	-0.0165	0.0049	0.0008	691817
rs16903490	5:37068046	NIPBL	A/G	0.831	0.0078	0.0023	0.0008	690738
rs1936433	9:87255047	NTRK2	T/C	0.1366	-0.0084	0.0025	0.0008	691655
rs10754800	1:243454083	SDCCAG8	A/G	0.8527	0.0084	0.0025	0.00081	691401
rs1875227	16:56598615	BBS2	T/C	0.06835	0.011	0.0033	0.00082	780241
rs234632	20:57482070	GNAS	T/G	0.9651	0.0168	0.005	0.00082	661787
rs11140720	9:87272824	NTRK2	A/C	0.91382	0.0103	0.0031	0.00082	692490
rs11140707	9:87250190	NTRK2	A/G	0.3047	-0.0063	0.0019	0.00083	692230
rs2994339	1:243641420	SDCCAG8	A/G	0.8087	0.0073	0.0022	0.00083	688149
rs2071486	4:122740162	BBS7	T/C	0.336	0.0061	0.0018	0.00084	691919
rs9915248	17:17747514	RAI1	T/C	0.6351	0.0062	0.0019	0.00084	637819
rs2074800	16:3725682	CREBBP	A/G	0.04946	0.014	0.0042	0.00085	677338
rs12424648	12:76725000	BBS10	A/G	0.0442	0.012	0.0036	0.00086	766646
rs8054755	16:3741122	CREBBP	T/C	0.03853	0.0158	0.0047	0.00087	666109
rs11140721	9:87274748	NTRK2	C/G	0.08594	-0.0103	0.0031	0.00087	692417
rs11805838	1:243452013	SDCCAG8	A/G	0.8556	0.0083	0.0025	0.00088	691593
rs2290009	2:170402707	BBS5	T/C	0.9672	0.0163	0.0049	0.00089	691037
rs9891957	17:17744439	RAI1	A/G	0.6353	0.0062	0.0019	0.00091	633915
rs10119181	9:87475368	NTRK2	T/G	0.8637	-0.0079	0.0024	0.00094	790562
rs7580520	2:63909178	WDPCP	T/C	0.6946	-0.0063	0.0019	0.00095	675433
rs738518	22:37119800	IFT27	T/C	0.7349	0.0066	0.002	0.00096	682346
rs11227510	11:66281220	BBS1	T/C	0.7543	0.0066	0.002	0.00097	692424
rs1507994	4:122749541	BBS7	T/C	0.3352	0.0061	0.0018	0.00097	692026
rs12936587	17:17543722	RAI1	A/G	0.4536	0.0054	0.0016	0.00097	794884
rs11195360	10:112633918	BBIP1	T/C	0.31	-0.0062	0.0019	0.001	689487
rs10254276	7:33297773	BBS9	T/C	0.94697	-0.0126	0.0038	0.001	689449
rs16888410	6:57110862	RAB23	T/C	0.04081	-0.0151	0.0046	0.001	677826
rs4925115	17:17721457	RAI1	A/G	0.3763	-0.006	0.0018	0.001	682336
rs12890993	14:89310261	TTC8	A/G	0.8808	-0.0086	0.0026	0.001	691492
rs12897989	14:89311774	TTC8	A/G	0.1191	0.0085	0.0026	0.001	691474
rs17124926	14:89332542	TTC8	A/G	0.8807	-0.0086	0.0026	0.001	691454
rs11227512	11:66281291	BBS1	T/C	0.7543	0.0065	0.002	0.0011	692593
rs17065	11:66277035	BBS1	A/G	0.2454	-0.0066	0.002	0.0011	692591
rs17496250	11:66270774	BBS1	C/G	0.7546	0.0066	0.002	0.0011	692568
rs2305535	11:66272237	BBS1	A/G	0.248	-0.0066	0.002	0.0011	692569
rs3816492	11:66297363	BBS1	T/C	0.246	-0.0066	0.002	0.0011	692547
rs9875616	3:45979877	LZTFL1	A/G	0.7133	0.0061	0.0019	0.0011	691593
rs11140694	9:87240130	NTRK2	T/C	0.8643	0.0082	0.0025	0.0011	689757
rs9969765	9:87489785	NTRK2	C/G	0.341	0.0061	0.0019	0.0011	633500
rs11800122	1:243613748	SDCCAG8	A/G	0.1655	-0.0078	0.0024	0.0011	670401
rs17114990	15:25243304	SNURF	A/G	0.97884	-0.0195	0.006	0.0011	686964
rs7173388	15:25263027	SNURF	A/G	0.97895	-0.0193	0.0059	0.0011	673448
rs12885238	14:89286425	TTC8	A/C	0.119	0.0085	0.0026	0.0011	690643
rs2054120	2:63911816	WDPCP	A/G	0.2267	-0.0067	0.002	0.0011	684949
rs7560499	2:63983802	WDPCP	T/C	0.8635	-0.0083	0.0025	0.0011	686038
rs10501397	11:66272976	BBS1	A/C	0.2481	-0.0065	0.002	0.0012	692457
rs11227511	11:66281244	BBS1	A/C	0.7537	0.0065	0.002	0.0012	692414
rs11550299	11:66254085	BBS1	T/G	0.2495	-0.0066	0.0021	0.0012	643321
rs2298806	11:66282095	BBS1	A/G	0.2461	-0.0065	0.002	0.0012	692575
rs2305532	11:66298594	BBS1	T/C	0.2457	-0.0065	0.002	0.0012	692533
rs2305533	11:66298623	BBS1	A/C	0.7543	0.0065	0.002	0.0012	692533
rs9889162	16:56555788	BBS2	A/T	0.2635	-0.0063	0.0019	0.0012	692183
rs4556159	9:140719390	EHMT1	T/G	0.6283	-0.0058	0.0018	0.0012	687503
rs2531742	3:45841068	LZTFL1	A/G	0.4096	0.0057	0.0018	0.0012	692550
rs1582245	9:87261279	NTRK2	A/T	0.08583	-0.01	0.0031	0.0012	689858
rs4394479	9:87618543	NTRK2	A/G	0.1462	-0.008	0.0025	0.0012	689352
rs6085092	20:5300006	PROKR2	T/C	0.5699	0.0057	0.0018	0.0012	681338
rs6565261	16:28903656	SH2B1	A/C	0.2891	-0.006	0.0018	0.0012	773743
rs12890609	14:89370055	TTC8	C/G	0.1179	0.0085	0.0026	0.0012	692222
rs6546028	2:64060658	WDPCP	C/G	0.95627	-0.0131	0.004	0.0012	675196
rs3741360	11:66300348	BBS1	A/G	0.7529	0.0065	0.002	0.0013	692041
rs13396747	2:170397635	BBS5	A/C	0.03315	-0.0146	0.0045	0.0013	786720
rs11789684	9:140706127	EHMT1	A/G	0.6244	-0.0058	0.0018	0.0013	688403
rs1463680	3:45996761	LZTFL1	A/G	0.7125	0.0061	0.0019	0.0013	690983
rs1439054	9:87267699	NTRK2	A/G	0.91359	0.0099	0.0031	0.0013	691822
rs1010479	20:5300427	PROKR2	A/G	0.4339	-0.0056	0.0018	0.0013	681330
rs6139697	20:5326578	PROKR2	T/C	0.2201	0.0069	0.0021	0.0013	690264
rs2145710	14:89392752	TTC8	A/G	0.7021	-0.0061	0.0019	0.0013	678000
rs1517408	2:63490493	WDPCP	A/G	0.4914	0.0052	0.0016	0.0013	793291
rs10896125	11:66288733	BBS1	C/G	0.2462	-0.0064	0.002	0.0014	692477
rs11227501	11:66274072	BBS1	T/C	0.7537	0.0064	0.002	0.0014	692598
rs11227515	11:66287383	BBS1	A/G	0.2461	-0.0064	0.002	0.0014	692436
rs4556786	16:56485871	BBS2	A/G	0.2473	-0.0064	0.002	0.0014	691326
rs4777529	15:73013776	BBS4	A/G	0.09091	-0.0095	0.003	0.0014	691110
rs3843532	7:33154447	BBS9	T/C	0.2442	-0.0066	0.0021	0.0014	668551
rs130038	16:3857035	CREBBP	T/G	0.94124	0.0131	0.0041	0.0014	618054
rs6116759	20:5334440	PROKR2	A/C	0.7958	-0.007	0.0022	0.0014	685017
rs11621939	14:89291735	TTC8	A/T	0.881	-0.0084	0.0026	0.0014	691667
rs17124947	14:89361488	TTC8	A/C	0.1201	0.0084	0.0026	0.0014	692519
rs9323833	14:89294699	TTC8	T/C	0.1191	0.0084	0.0026	0.0014	691549
rs12472865	2:63771769	WDPCP	T/C	0.2237	-0.0065	0.002	0.0014	690937
rs11822028	11:66288123	BBS1	T/C	0.7523	0.0064	0.002	0.0015	692475
rs17147644	11:66256660	BBS1	T/C	0.2489	-0.0064	0.002	0.0015	691420
rs3819247	11:66293779	BBS1	T/C	0.7537	0.0064	0.002	0.0015	692463
rs4930379	11:66255674	BBS1	A/G	0.2489	-0.0064	0.002	0.0015	692544
rs17395534	7:33234331	BBS9	A/G	0.94826	-0.0116	0.0036	0.0015	777987
rs7851955	9:140708768	EHMT1	T/G	0.3748	0.0057	0.0018	0.0015	687851
rs4554233	5:42619316	GHR	A/G	0.8072	0.007	0.0022	0.0015	692381
rs13440094	9:87619071	NTRK2	T/C	0.1773	-0.0074	0.0023	0.0015	689479
rs1662695	9:87405212	NTRK2	A/G	0.8699	0.0079	0.0025	0.0015	773832
rs3780632	9:87352788	NTRK2	T/C	0.6595	0.0058	0.0018	0.0015	687598
rs4877288	9:87388848	NTRK2	A/G	0.6631	0.0059	0.0018	0.0015	681968
rs223289	6:57106426	RAB23	T/G	0.1036	-0.0093	0.0029	0.0015	672677
rs1109027	2:63815206	WDPCP	A/G	0.7758	0.0065	0.002	0.0015	691974
rs13337155	16:56504724	BBS2	C/G	0.2483	-0.0063	0.002	0.0016	692374
rs8060037	16:56484820	BBS2	T/C	0.2512	-0.0063	0.002	0.0016	691213
rs1439621	15:93441907	CHD2	A/G	0.3181	0.0059	0.0019	0.0016	689030
rs7170052	15:93457650	CHD2	T/C	0.7515	0.0064	0.002	0.0016	674631
rs11948453	5:42610117	GHR	T/G	0.1973	-0.0069	0.0022	0.0016	686660
rs850810	15:23897899	MAGEL2	C/G	0.4088	-0.0057	0.0018	0.0016	680681
rs10746750	9:87384534	NTRK2	A/G	0.6622	0.0058	0.0018	0.0016	683157
rs7048278	9:87360153	NTRK2	A/G	0.6597	0.0058	0.0018	0.0016	686887
rs10737887	1:243424146	SDCCAG8	T/C	0.1292	-0.0083	0.0026	0.0016	692514
rs11624930	14:89371838	TTC8	T/C	0.1176	0.0083	0.0026	0.0016	692044
rs7950407	11:66258006	BBS1	A/G	0.7532	0.0063	0.002	0.0017	692454
rs10007956	4:122700669	BBS7	A/T	0.4347	-0.0054	0.0017	0.0017	687385
rs11724322	4:122697850	BBS7	A/T	0.4356	-0.0054	0.0017	0.0017	687086
rs1891628	9:140477812	EHMT1	A/G	0.1975	0.0066	0.0021	0.0017	774508
rs4866791	5:42617692	GHR	A/G	0.8024	0.0068	0.0022	0.0017	684162
rs2378671	9:87382724	NTRK2	T/C	0.343	-0.0058	0.0018	0.0017	684254
rs7046620	9:87365120	NTRK2	A/G	0.3406	-0.0057	0.0018	0.0017	686750
rs7867174	9:87381476	NTRK2	C/G	0.3396	-0.0058	0.0018	0.0017	685435
rs8038349	15:25270440	SNURF	T/G	0.02116	0.0187	0.006	0.0017	673651
rs10210482	2:64058713	WDPCP	T/C	0.95615	-0.0137	0.0044	0.0017	671474
rs2421879	2:63483916	WDPCP	A/C	0.4916	0.0054	0.0017	0.0017	690108
rs2699393	2:63491438	WDPCP	A/G	0.5101	-0.0054	0.0017	0.0017	688621
rs2699397	2:63487218	WDPCP	T/C	0.5084	-0.0054	0.0017	0.0017	689915
rs16959558	16:56576069	BBS2	T/C	0.8403	-0.0072	0.0023	0.0018	767835
rs11624618	14:89381569	TTC8	A/G	0.1176	0.0082	0.0026	0.0018	691900
rs17618045	2:63793255	WDPCP	T/C	0.7762	0.0064	0.002	0.0018	691288
rs2277302	11:66240882	BBS1	T/C	0.7499	0.0062	0.002	0.0019	692595
rs3892818	11:66240191	BBS1	A/G	0.2498	-0.0062	0.002	0.0019	692553
rs6462473	7:33418376	BBS9	A/C	0.2211	-0.0065	0.0021	0.0019	688929
rs10780185	9:140607252	EHMT1	T/C	0.382	0.0056	0.0018	0.0019	680833
rs13354167	5:42610409	GHR	T/C	0.1917	-0.0069	0.0022	0.0019	686969
rs7709790	5:42610090	GHR	C/G	0.8094	0.0069	0.0022	0.0019	686747
rs1778970	9:87395810	NTRK2	A/G	0.3371	-0.0057	0.0018	0.0019	681795
rs2028285	9:87256733	NTRK2	A/T	0.6894	0.0058	0.0019	0.0019	690817
rs7023589	9:87372097	NTRK2	A/G	0.6639	0.0057	0.0018	0.0019	685777
rs6107619	20:5316112	PROKR2	A/G	0.2268	-0.0064	0.0021	0.0019	685353
rs8036379	15:25294617	SNURF	A/G	0.97965	-0.0187	0.006	0.0019	673416
rs10098852	8:100921303	VPS13B	A/G	0.638	0.0057	0.0018	0.0019	692470
rs1850983	2:63448724	WDPCP	C/G	0.97539	0.017	0.0055	0.0019	689359
rs4930183	11:66255732	BBS1	T/C	0.2489	-0.0062	0.002	0.002	692542
rs9995319	4:122770677	BBS7	C/G	0.3858	-0.0054	0.0018	0.002	685933
rs11140745	9:87355358	NTRK2	T/C	0.341	-0.0057	0.0018	0.002	687720
rs11140746	9:87358664	NTRK2	T/C	0.3414	-0.0057	0.0018	0.002	686627
rs1187272	9:87404086	NTRK2	A/G	0.6631	0.0057	0.0019	0.002	678840
rs996406	20:5313380	PROKR2	T/G	0.773	0.0064	0.0021	0.002	684557
rs12945496	17:17537197	RAI1	C/G	0.3895	0.0055	0.0018	0.002	683844
rs17619012	2:63893589	WDPCP	T/G	0.2265	-0.0064	0.0021	0.002	688626
rs9940872	16:56561857	BBS2	T/C	0.7343	0.006	0.0019	0.0021	691685
rs1048012	22:37163329	IFT27	T/C	0.7963	0.0069	0.0022	0.0021	638284
rs850807	15:23898129	MAGEL2	T/C	0.4089	-0.0056	0.0018	0.0021	674338
rs10746747	9:87354637	NTRK2	A/T	0.3405	-0.0056	0.0018	0.0021	686786
rs1838159	9:87406956	NTRK2	T/G	0.6625	0.0057	0.0019	0.0021	670824
rs4815798	20:5338936	PROKR2	A/G	0.7565	0.0062	0.002	0.0021	690210
rs16888420	6:57121359	RAB23	T/C	0.04098	-0.014	0.0045	0.0021	679495
rs10803140	1:243573389	SDCCAG8	C/G	0.467	-0.0053	0.0017	0.0021	688941
rs17115060	15:25279862	SNURF	T/C	0.02099	0.0184	0.006	0.0021	673376
rs8037588	15:25274031	SNURF	C/G	0.97901	-0.0185	0.006	0.0021	673546
rs1517407	2:63490331	WDPCP	A/G	0.5085	-0.0053	0.0017	0.0021	690374
rs4930378	11:66255515	BBS1	T/C	0.7504	0.0061	0.002	0.0022	692548
rs16957293	15:73063519	BBS4	T/C	0.09115	-0.0091	0.003	0.0022	691303
rs3759870	15:73019968	BBS4	A/G	0.90792	0.0091	0.003	0.0022	692240
rs17395966	7:33238151	BBS9	A/G	0.94826	-0.0118	0.0039	0.0022	675561
rs1992283	15:93438609	CHD2	C/G	0.6821	-0.0057	0.0019	0.0022	690997
rs12446940	16:3962620	CREBBP	A/G	0.3614	-0.0057	0.0019	0.0022	638663
rs139472	22:41617318	EP300	C/G	0.6605	-0.0056	0.0018	0.0022	690093
rs7286979	22:41498627	EP300	A/G	0.3385	0.0056	0.0018	0.0022	689296
rs4144550	9:87369613	NTRK2	A/G	0.1355	-0.0079	0.0026	0.0022	674151
rs17115045	15:25272862	SNURF	A/G	0.9779	-0.0183	0.006	0.0022	673507
rs8036980	15:25287728	SNURF	A/G	0.97907	-0.0184	0.006	0.0022	673443
rs8037435	15:25273965	SNURF	T/C	0.02099	0.0184	0.006	0.0022	673570
rs10983313	9:119470959	TRIM32	A/C	0.91511	0.0092	0.003	0.0022	691796
rs2699394	2:63491169	WDPCP	T/C	0.4909	0.0053	0.0017	0.0022	689727
rs2901574	2:63492410	WDPCP	A/C	0.4895	0.0052	0.0017	0.0022	689819
rs2076578	22:41569609	EP300	T/C	0.3382	0.0056	0.0018	0.0023	691874
rs79545	22:41618372	EP300	A/G	0.3382	0.0056	0.0018	0.0023	692153
rs7702524	5:42613898	GHR	T/C	0.1717	-0.007	0.0023	0.0023	687165
rs10080526	6:57122994	RAB23	T/C	0.04134	-0.0137	0.0045	0.0023	678857
rs17115056	15:25275928	SNURF	T/G	0.02105	0.0183	0.006	0.0023	673591
rs3737525	11:66306355	BBS1	A/G	0.7483	0.0061	0.002	0.0024	691778
rs4776611	15:73004188	BBS4	T/C	0.09144	-0.009	0.003	0.0024	691400
rs7037783	9:140610042	EHMT1	T/C	0.621	-0.0057	0.0019	0.0024	625499
rs6996321	8:38322346	FGFR1	A/G	0.3849	-0.005	0.0017	0.0024	795544
rs1778971	9:87394720	NTRK2	C/G	0.6631	0.0056	0.0018	0.0024	681106
rs9357941	6:57074911	RAB23	A/G	0.05022	-0.0127	0.0042	0.0024	688308
rs12943416	17:17535535	RAI1	A/C	0.6104	-0.0054	0.0018	0.0024	683633
rs1517406	2:63486777	WDPCP	A/C	0.4901	0.0052	0.0017	0.0024	690335
rs17028100	2:63940783	WDPCP	A/T	0.2498	0.006	0.002	0.0024	686453
rs1407696	10:112638028	BBIP1	T/G	0.2988	-0.0057	0.0019	0.0025	689101
rs11600009	11:66253475	BBS1	T/C	0.03502	-0.0147	0.0049	0.0025	671780
rs4076212	4:122799461	BBS7	A/T	0.8709	0.0081	0.0027	0.0025	652149
rs139467	22:41614996	EP300	A/G	0.3374	0.0055	0.0018	0.0025	692311
rs139468	22:41615028	EP300	T/C	0.3374	0.0055	0.0018	0.0025	692172
rs17002284	22:41496846	EP300	A/G	0.662	-0.0055	0.0018	0.0025	688639
rs10440649	5:42616341	GHR	A/T	0.1907	-0.0067	0.0022	0.0025	687642
rs11807162	1:243454680	SDCCAG8	A/G	0.1234	-0.0081	0.0027	0.0025	690039
rs4833236	4:122776067	BBS7	A/G	0.6145	0.0053	0.0018	0.0026	691925
rs4833778	4:122837623	BBS7	A/G	0.3309	-0.0055	0.0018	0.0026	692020
rs139461	22:41611460	EP300	T/C	0.3376	0.0055	0.0018	0.0026	692504
rs8138990	22:41597377	EP300	A/C	0.6624	-0.0055	0.0018	0.0026	692234
rs6123836	20:57448746	GNAS	T/C	0.3563	0.0053	0.0018	0.0026	762299
rs5756342	22:37179546	IFT27	C/G	0.7962	0.0069	0.0023	0.0026	682507
rs10465179	9:87392389	NTRK2	T/C	0.6583	0.0055	0.0018	0.0026	682302
rs4815797	20:5338636	PROKR2	T/C	0.7562	0.006	0.002	0.0026	690774
rs12134228	1:243447618	SDCCAG8	T/C	0.1284	-0.0079	0.0026	0.0026	691783
rs8038366	15:25270469	SNURF	A/G	0.02099	0.0178	0.0059	0.0026	685276
rs10983293	9:119417422	TRIM32	A/G	0.91575	0.0091	0.003	0.0026	692206
rs3825065	11:66311011	BBS1	A/G	0.7469	0.0057	0.0019	0.0027	788492
rs2292232	4:122836332	BBS7	T/G	0.3309	-0.0055	0.0018	0.0027	692146
rs7806498	7:33355624	BBS9	C/G	0.0535	0.0116	0.0039	0.0027	686539
rs2143694	22:41584351	EP300	A/G	0.3376	0.0055	0.0018	0.0027	692640
rs5758222	22:41486193	EP300	A/G	0.662	-0.0055	0.0018	0.0027	688268
rs9292854	5:42611820	GHR	C/G	0.1905	-0.0067	0.0022	0.0027	685943
rs12173390	6:57089708	RAB23	A/T	0.04373	-0.0141	0.0047	0.0027	682331
rs12026068	1:243440352	SDCCAG8	A/G	0.8705	0.0079	0.0026	0.0027	691591
rs12236506	9:119415142	TRIM32	C/G	0.91558	0.009	0.003	0.0027	692302
rs1814199	9:119401114	TRIM32	T/C	0.07004	-0.0099	0.0033	0.0027	691942
rs6468697	8:100870382	VPS13B	A/G	0.7882	-0.006	0.002	0.0027	765573
rs12473342	2:63942784	WDPCP	A/G	0.2497	0.006	0.002	0.0027	692340
rs13431584	2:63514651	WDPCP	A/G	0.474	0.0052	0.0017	0.0027	690011
rs10084948	4:122765649	BBS7	T/C	0.3889	-0.0052	0.0018	0.0028	691876
rs2109526	7:33511742	BBS9	T/G	0.1748	0.0069	0.0023	0.0028	678907
rs6952538	7:33357152	BBS9	T/G	0.9465	-0.0115	0.0039	0.0028	686592
rs10835218	11:27779650	BDNF	C/G	0.3754	0.0054	0.0018	0.0028	676095
rs950078	9:140466816	EHMT1	A/G	0.1966	0.0066	0.0022	0.0028	689684
rs5751058	22:41565285	EP300	A/G	0.6617	-0.0056	0.0019	0.0028	637647
rs4810148	20:57447911	GNAS	T/C	0.652	-0.0055	0.0018	0.0028	684279
rs10465180	9:87392582	NTRK2	T/C	0.6583	0.0055	0.0019	0.0028	682265
rs10023020	4:122724604	BBS7	A/G	0.3873	-0.0052	0.0018	0.0029	692316
rs12510839	4:122760968	BBS7	A/G	0.3856	-0.0052	0.0018	0.0029	692077
rs13152701	4:122751061	BBS7	A/G	0.3856	-0.0052	0.0018	0.0029	689708
rs3217772	4:122739183	BBS7	C/G	0.6142	0.0052	0.0018	0.0029	691828
rs6962002	7:33365917	BBS9	A/G	0.05361	0.0115	0.0039	0.0029	678921
rs2094623	9:140477249	EHMT1	A/G	0.1973	0.0065	0.0022	0.0029	691635
rs10780690	9:87478172	NTRK2	T/G	0.5182	0.0052	0.0017	0.0029	684904
rs6730863	2:63939417	WDPCP	T/C	0.7509	-0.0059	0.002	0.0029	692489
rs993244	2:63489517	WDPCP	A/C	0.4914	0.0051	0.0017	0.0029	690292
rs13387104	2:170375686	BBS5	T/C	0.4473	0.0051	0.0017	0.003	688938
rs11721457	4:122839250	BBS7	T/G	0.3309	-0.0054	0.0018	0.003	692220
rs13127488	4:122830800	BBS7	A/G	0.6677	0.0054	0.0018	0.003	691780
rs13141092	4:122832344	BBS7	A/C	0.3313	-0.0054	0.0018	0.003	691921
rs3805161	4:122835040	BBS7	T/G	0.669	0.0054	0.0018	0.003	691526
rs9998785	4:122728965	BBS7	A/T	0.614	0.0052	0.0018	0.003	692446
rs7852475	9:140698856	EHMT1	T/C	0.6222	-0.0055	0.0018	0.003	666526
rs5758251	22:41570745	EP300	T/C	0.6618	-0.0054	0.0018	0.003	692064
rs13182117	5:42611848	GHR	T/G	0.8456	0.0072	0.0024	0.003	686991
rs10926979	1:243433141	SDCCAG8	C/G	0.6711	-0.0055	0.0018	0.003	691704
rs17115072	15:25282886	SNURF	C/G	0.02093	0.0177	0.006	0.003	685263
rs7164720	15:25288287	SNURF	T/C	0.97919	-0.0178	0.006	0.003	685239
rs10817917	9:119406202	TRIM32	T/C	0.06969	-0.0098	0.0033	0.003	692078
rs1829524	2:63407893	WDPCP	T/C	0.2032	0.0064	0.0022	0.003	690300
rs906496	4:122833314	BBS7	T/C	0.3312	-0.0054	0.0018	0.0031	692534
rs17087959	9:87575920	NTRK2	T/C	0.8266	0.007	0.0024	0.0031	677872
rs2900133	9:119416845	TRIM32	T/C	0.91522	0.009	0.003	0.0031	680648
rs13119055	4:122755162	BBS7	T/C	0.6144	0.0052	0.0018	0.0032	692013
rs3811742	4:122722693	BBS7	C/G	0.6136	0.0052	0.0018	0.0032	692201
rs6451634	5:42684937	GHR	T/C	0.1657	-0.0068	0.0023	0.0032	691445
rs10803131	1:243435622	SDCCAG8	A/G	0.6711	-0.0054	0.0018	0.0032	691789
rs13010733	2:63363355	WDPCP	T/G	0.8052	0.0065	0.0022	0.0032	686486
rs13145213	4:122750079	BBS7	T/C	0.3857	-0.0052	0.0018	0.0033	691853
rs17005256	4:122755245	BBS7	A/G	0.6142	0.0052	0.0018	0.0033	692092
rs3762840	4:122746596	BBS7	A/T	0.6142	0.0052	0.0018	0.0033	691954
rs12683290	9:140463729	EHMT1	T/C	0.7996	-0.0065	0.0022	0.0033	689005
rs2257839	9:140474526	EHMT1	A/G	0.8004	-0.0064	0.0022	0.0033	692230
rs4487855	9:140682841	EHMT1	T/C	0.6303	-0.0054	0.0019	0.0033	634385
rs7442690	5:42625755	GHR	A/G	0.1665	-0.0068	0.0023	0.0033	689537
rs3774634	3:45986442	LZTFL1	C/G	0.404	0.0051	0.0018	0.0033	690036
rs850817	15:23893689	MAGEL2	A/G	0.5911	0.0053	0.0018	0.0033	683498
rs6559839	9:87575426	NTRK2	T/C	0.7304	0.0058	0.002	0.0033	683298
rs17778117	20:5330878	PROKR2	T/C	0.7717	0.006	0.0021	0.0033	686410
rs9396263	6:57070684	RAB23	A/G	0.05051	-0.0123	0.0042	0.0033	688268
rs12947517	17:17539278	RAI1	T/C	0.3765	0.0053	0.0018	0.0033	679392
rs2052724	15:25294695	SNURF	T/C	0.97977	-0.0175	0.006	0.0033	685310
rs11790014	9:119449230	TRIM32	C/G	0.08489	-0.0089	0.003	0.0033	679819
rs1507993	4:122831281	BBS7	T/C	0.3319	-0.0053	0.0018	0.0034	691838
rs2271176	4:122791601	BBS7	C/G	0.3858	-0.0052	0.0018	0.0034	691762
rs4516739	4:122699741	BBS7	T/G	0.3483	0.0053	0.0018	0.0034	687669
rs884701	4:122830406	BBS7	A/G	0.3317	-0.0053	0.0018	0.0034	691615
rs8024528	15:93463631	CHD2	T/C	0.5295	0.005	0.0017	0.0034	689421
rs11137135	9:140464041	EHMT1	A/G	0.1994	0.0065	0.0022	0.0034	689359
rs1800900	20:57415110	GNAS	A/G	0.3593	-0.005	0.0017	0.0034	792624
rs1024626	3:45902844	LZTFL1	A/G	0.93224	0.0115	0.0039	0.0034	675743
rs12237968	9:119451880	TRIM32	T/G	0.91558	0.0089	0.003	0.0034	674006
rs10949013	6:57129687	RAB23	A/G	0.1136	-0.0081	0.0028	0.0035	692265
rs6735699	2:63794888	WDPCP	T/G	0.0159	-0.0174	0.006	0.0035	655577
rs3867132	11:66309269	BBS1	T/C	0.1731	-0.0066	0.0023	0.0036	691800
rs1048433	4:122748996	BBS7	A/C	0.615	0.0051	0.0018	0.0036	691917
rs5756339	22:37166457	IFT27	T/C	0.7972	0.0063	0.0022	0.0036	692492
rs999540	22:37121101	IFT27	A/G	0.1897	-0.0066	0.0023	0.0036	683785
rs6116754	20:5332049	PROKR2	T/C	0.7824	-0.0063	0.0022	0.0036	688358
rs10983312	9:119470800	TRIM32	C/G	0.07022	-0.0096	0.0033	0.0036	680054
rs4576	11:66331000	BBS1	A/G	0.7492	0.0058	0.002	0.0037	691657
rs11601962	11:27790303	BDNF	T/G	0.3743	0.0053	0.0018	0.0037	678433
rs6451633	5:42678017	GHR	T/C	0.1669	-0.0067	0.0023	0.0037	691517
rs6873794	5:42674205	GHR	T/C	0.8341	0.0067	0.0023	0.0037	691947
rs4821525	22:37169985	IFT27	T/C	0.2038	-0.0063	0.0022	0.0037	692355
rs13066048	3:45982414	LZTFL1	T/C	0.4028	0.0051	0.0018	0.0037	690406
rs6576608	15:23909626	MAGEL2	A/G	0.4521	-0.0052	0.0018	0.0037	670177
rs4412435	9:87585497	NTRK2	T/C	0.5623	0.0051	0.0017	0.0037	683440
rs12079656	1:243453119	SDCCAG8	T/G	0.3292	0.0053	0.0018	0.0037	692542
rs10520716	15:93491017	CHD2	A/G	0.5297	0.005	0.0017	0.0038	688684
rs863701	9:140470119	EHMT1	A/G	0.8013	-0.0063	0.0022	0.0038	692449
rs4413537	5:42645846	GHR	T/C	0.1665	-0.0067	0.0023	0.0038	691599
rs6894403	5:42689895	GHR	A/G	0.8375	0.0067	0.0023	0.0038	684894
rs12685845	9:87464336	NTRK2	A/G	0.1389	0.0074	0.0026	0.0038	687295
rs984682	2:63345921	WDPCP	A/G	0.2038	0.0062	0.0022	0.0038	687234
rs10501091	11:27787783	BDNF	T/C	0.6255	-0.0052	0.0018	0.0039	679157
rs11957404	5:42616164	GHR	A/T	0.1718	-0.0066	0.0023	0.0039	681485
rs4594864	5:42624138	GHR	T/C	0.8337	0.0067	0.0023	0.0039	690270
rs5025611	5:42712153	GHR	A/G	0.8364	0.0067	0.0023	0.0039	690636
rs7273251	20:57450415	GNAS	T/C	0.02958	0.016	0.0055	0.0039	540501
rs3774639	3:45983654	LZTFL1	A/G	0.4025	0.0051	0.0018	0.0039	691274
rs4683147	3:45948264	LZTFL1	A/G	0.4045	0.0052	0.0018	0.0039	677336
rs6559840	9:87575500	NTRK2	T/C	0.27	-0.0057	0.002	0.0039	683299
rs13000147	2:63424045	WDPCP	A/C	0.8258	0.0066	0.0023	0.0039	688250
rs10250448	7:33489223	BBS9	A/G	0.899	0.0082	0.0029	0.004	689695
rs6462470	7:33367004	BBS9	A/C	0.05361	0.0111	0.0039	0.004	684770
rs1881835	15:93490189	CHD2	A/C	0.5303	0.005	0.0017	0.004	688735
rs10041932	5:42641889	GHR	A/G	0.8336	0.0066	0.0023	0.004	691626
rs6878461	5:42674369	GHR	A/G	0.8341	0.0067	0.0023	0.004	691943
rs4821524	22:37168725	IFT27	T/C	0.7962	0.0062	0.0022	0.004	692100
rs5750303	22:37166674	IFT27	T/C	0.7964	0.0062	0.0022	0.004	692442
rs2165555	9:119425815	TRIM32	T/G	0.92984	0.0095	0.0033	0.004	680066
rs11227534	11:66336171	BBS1	A/C	0.2499	-0.0057	0.002	0.0041	685335
rs4784683	16:56594499	BBS2	A/C	0.0898	0.0089	0.0031	0.0041	678620
rs11030134	11:27786474	BDNF	T/C	0.6249	-0.0051	0.0018	0.0041	679716
rs11137140	9:140488857	EHMT1	C/G	0.654	0.0054	0.0019	0.0041	670182
rs876471	8:38333273	FGFR1	A/C	0.3734	-0.0051	0.0018	0.0041	689440
rs11948463	5:42640471	GHR	T/C	0.1676	-0.0066	0.0023	0.0041	691604
rs7447731	5:42680233	GHR	T/C	0.166	-0.0066	0.0023	0.0041	691646
rs9292856	5:42645266	GHR	T/G	0.8335	0.0066	0.0023	0.0041	691503
rs6100282	20:57507885	GNAS	A/G	0.1893	0.0066	0.0023	0.0041	672848
rs12005792	9:87236739	NTRK2	T/C	0.7761	0.0061	0.0021	0.0041	678416
rs1596360	9:87579148	NTRK2	A/G	0.2692	-0.0057	0.002	0.0041	683456
rs12074660	1:243451974	SDCCAG8	T/C	0.6711	-0.0053	0.0019	0.0041	684889
rs10983299	9:119427274	TRIM32	A/G	0.07016	-0.0095	0.0033	0.0041	680234
rs7832556	8:100923156	VPS13B	A/G	0.3655	-0.0053	0.0019	0.0041	660545
rs4777528	15:72993049	BBS4	T/C	0.09086	-0.0085	0.003	0.0042	691377
rs6000410	22:37177190	IFT27	A/G	0.2038	-0.0063	0.0022	0.0042	691630
rs6116721	20:5255078	PROKR2	T/G	0.6162	0.0051	0.0018	0.0042	692368
rs2275154	1:243433654	SDCCAG8	A/G	0.6712	-0.0053	0.0018	0.0042	691622
rs1439618	15:93449969	CHD2	A/G	0.5402	0.005	0.0018	0.0043	671038
rs4451056	5:42655353	GHR	C/G	0.1659	-0.0066	0.0023	0.0043	692373
rs6451632	5:42669982	GHR	A/G	0.834	0.0066	0.0023	0.0043	692198
rs4877894	9:87590382	NTRK2	A/G	0.571	0.0049	0.0017	0.0043	692056
rs2278543	15:73077202	BBS4	A/G	0.90938	0.0084	0.003	0.0044	691234
rs12670765	7:33412528	BBS9	C/G	0.0532	0.0111	0.0039	0.0044	676028
rs12677355	8:38329943	FGFR1	T/C	0.3796	-0.0051	0.0018	0.0044	688328
rs7721081	5:42650384	GHR	T/C	0.1659	-0.0066	0.0023	0.0044	692418
rs129333	22:37153289	IFT27	A/G	0.2034	-0.0062	0.0022	0.0044	691789
rs4821522	22:37168444	IFT27	A/G	0.2025	-0.0062	0.0022	0.0044	692253
rs2248228	3:45965386	LZTFL1	A/G	0.4021	0.005	0.0018	0.0044	691154
rs240768	6:100957344	SIM1	T/C	0.95089	0.0108	0.0038	0.0044	795033
rs7173103	15:93462960	CHD2	T/G	0.4697	-0.0049	0.0017	0.0045	689201
rs7390131	9:140680073	EHMT1	T/C	0.3707	0.0051	0.0018	0.0045	689446
rs7583698	2:27712408	IFT172	T/C	0.05443	0.0104	0.0036	0.0045	781112
rs10926978	1:243431654	SDCCAG8	T/C	0.6711	-0.0052	0.0018	0.0045	691529
rs309415	4:123621228	BBS12	A/G	0.5697	0.0049	0.0017	0.0046	691621
rs2683455	2:170411693	BBS5	T/C	0.3528	0.0051	0.0018	0.0046	691862
rs10867067	9:140680532	EHMT1	A/G	0.6292	-0.0051	0.0018	0.0046	689780
rs715582	22:37117084	IFT27	A/G	0.6968	0.0054	0.0019	0.0046	689635
rs2054866	3:45990217	LZTFL1	A/G	0.5962	-0.005	0.0018	0.0046	691818
rs9475805	6:57129759	RAB23	A/T	0.8873	0.0078	0.0028	0.0046	692177
rs12091558	1:243453910	SDCCAG8	T/C	0.3296	0.0052	0.0018	0.0046	691977
rs3897821	1:243420388	SDCCAG8	A/G	0.6642	-0.0052	0.0018	0.0046	692010
rs2683451	2:170384532	BBS5	A/G	0.5545	-0.0046	0.0016	0.0047	793529
rs3805158	4:122824972	BBS7	A/G	0.6577	0.0051	0.0018	0.0047	690702
rs7802391	7:33560825	BBS9	T/G	0.02496	0.0152	0.0054	0.0047	664795
rs1569857	22:41540934	EP300	C/G	0.6617	-0.0052	0.0018	0.0047	691573
rs4994772	5:42668149	GHR	A/C	0.1665	-0.0065	0.0023	0.0047	692247
rs4075274	9:87596562	NTRK2	T/C	0.4288	-0.0049	0.0017	0.0047	690905
rs10949014	6:57131213	RAB23	A/G	0.8863	0.0078	0.0028	0.0047	688523
rs4777540	15:73078286	BBS4	A/T	0.90786	0.0083	0.0029	0.0048	691250
rs11732666	4:122824052	BBS7	T/C	0.3426	-0.0051	0.0018	0.0048	690820
rs6878512	5:42667871	GHR	T/C	0.1668	-0.0065	0.0023	0.0048	692272
rs13194787	6:84722195	MRAP2	A/C	0.09559	-0.0076	0.0027	0.0048	626910
rs2994329	1:243647921	SDCCAG8	T/C	0.1961	-0.006	0.0021	0.0048	692587
rs3798508	6:100853964	SIM1	T/C	0.2065	0.0058	0.0021	0.0048	736120
rs11769528	7:33537666	BBS9	A/C	0.825	-0.0065	0.0023	0.0049	661979
rs12638201	3:45934279	LZTFL1	A/G	0.06665	0.0094	0.0033	0.0049	679329
rs6038134	20:5311616	PROKR2	T/C	0.53	0.0049	0.0017	0.0049	681230
rs951974	4:122828794	BBS7	T/G	0.6584	0.0051	0.0018	0.005	690821
rs12666246	7:33424928	BBS9	T/C	0.05098	0.011	0.0039	0.005	676370
rs17170243	7:33482084	BBS9	T/C	0.899	0.0081	0.0029	0.005	689383
rs4075561	9:87595771	NTRK2	T/G	0.5712	0.0049	0.0017	0.005	691235
rs2145095	20:5317586	PROKR2	A/G	0.3913	0.005	0.0018	0.005	684189
rs7266208	20:5295566	PROKR2	A/C	0.3472	-0.0051	0.0018	0.005	689160
rs6826506	4:122710865	BBS7	T/G	0.6535	-0.0051	0.0018	0.0051	690098
rs6983315	8:38299419	FGFR1	A/G	0.4294	-0.0049	0.0018	0.0051	691811
rs6987534	8:38299715	FGFR1	C/G	0.4295	-0.0049	0.0018	0.0051	690864
rs4535265	3:45977866	LZTFL1	T/C	0.4025	0.0049	0.0018	0.0051	690403
rs9831315	3:45956362	LZTFL1	C/G	0.4055	0.0049	0.0017	0.0051	691835
rs6906645	6:57130574	RAB23	T/C	0.8888	0.0077	0.0028	0.0051	692229
rs10803132	1:243437266	SDCCAG8	T/C	0.6711	-0.0051	0.0018	0.0051	691668
rs12666395	7:33502696	BBS9	A/C	0.94843	-0.011	0.0039	0.0052	676377
rs4866792	5:42651224	GHR	T/C	0.8338	0.0065	0.0023	0.0052	692538
rs4075562	9:87595866	NTRK2	T/C	0.5711	0.0048	0.0017	0.0052	691288
rs12443243	15:93465927	CHD2	T/C	0.4674	-0.0048	0.0017	0.0053	691680
rs13188386	5:42473555	GHR	A/G	0.2665	-0.0054	0.0019	0.0053	692497
rs4419597	5:42666104	GHR	T/C	0.1777	-0.0063	0.0023	0.0053	691636
rs7129	3:45959759	LZTFL1	T/C	0.5908	-0.0049	0.0017	0.0053	692607
rs936938	3:45980769	LZTFL1	T/C	0.4041	0.0049	0.0018	0.0053	691105
rs12439375	15:73080316	BBS4	A/G	0.90833	0.0082	0.0029	0.0054	692218
rs1552489	3:45993973	LZTFL1	T/C	0.4039	0.0049	0.0018	0.0054	691717
rs6116751	20:5325472	PROKR2	T/C	0.526	0.0048	0.0017	0.0054	684957
rs2075792	11:66334556	BBS1	A/G	0.2505	-0.0055	0.002	0.0055	691495
rs129968	16:3791261	CREBBP	A/G	0.3499	0.0051	0.0018	0.0055	691938
rs7351709	20:5296798	PROKR2	T/C	0.6519	0.005	0.0018	0.0055	687884
rs10116287	9:87477274	NTRK2	T/G	0.8587	-0.0071	0.0025	0.0056	689127
rs3733103	3:45962595	LZTFL1	C/G	0.5924	-0.005	0.0018	0.0057	637607
rs4683157	3:46004307	LZTFL1	T/C	0.401	0.0049	0.0018	0.0057	689620
rs4812034	20:57397566	GNAS	T/G	0.535	0.0048	0.0017	0.0058	689525
rs4683140	3:45822918	LZTFL1	T/C	0.4566	0.005	0.0018	0.0058	662145
rs11697457	20:5328077	PROKR2	A/G	0.95621	-0.0115	0.0042	0.0058	683209
rs2992632	1:243503764	SDCCAG8	A/T	0.7067	-0.0053	0.0019	0.0058	675368
rs6979138	7:33440913	BBS9	T/C	0.94837	-0.0108	0.0039	0.0059	676338
rs7396690	11:8115762	TUB	C/G	0.04408	0.0104	0.0038	0.0059	614097
rs6100283	20:57515103	GNAS	T/G	0.8145	-0.0068	0.0025	0.006	526672
rs1387926	9:87632663	NTRK2	T/C	0.1414	-0.0068	0.0025	0.006	690985
rs1072755	3:45975983	LZTFL1	A/G	0.5948	-0.0048	0.0018	0.0061	691038
rs8120223	20:5296005	PROKR2	T/C	0.3468	-0.005	0.0018	0.0061	688497
rs6695785	1:243535260	SDCCAG8	T/C	0.4658	-0.0048	0.0017	0.0061	676830
rs10817918	9:119406846	TRIM32	T/C	0.92996	0.0091	0.0033	0.0061	680282
rs309404	4:123617741	BBS12	A/T	0.4291	-0.0048	0.0017	0.0062	692015
rs309418	4:123623441	BBS12	A/G	0.4112	-0.0048	0.0018	0.0062	691265
rs7270408	20:5285094	PROKR2	A/G	0.3816	-0.0049	0.0018	0.0062	689526
rs12741781	1:243428152	SDCCAG8	T/G	0.6649	-0.005	0.0018	0.0062	688409
rs368931	4:123631597	BBS12	T/G	0.5889	0.0048	0.0018	0.0063	691421
rs11030132	11:27782291	BDNF	C/G	0.6258	-0.0049	0.0018	0.0063	678170
rs8125112	20:57431165	GNAS	T/C	0.842	-0.0064	0.0024	0.0063	688347
rs3774642	3:45937782	LZTFL1	C/G	0.93312	-0.0091	0.0033	0.0063	691907
rs1025131	2:63361516	WDPCP	T/C	0.2	0.0059	0.0022	0.0063	687581
rs4630309	11:66333072	BBS1	A/C	0.2501	-0.0054	0.002	0.0064	690079
rs11098645	4:122729251	BBS7	A/G	0.3182	0.0051	0.0019	0.0064	692025
rs4923473	11:27787418	BDNF	A/T	0.6257	-0.0049	0.0018	0.0064	679148
rs3749475	4:122821162	BBS7	T/C	0.98164	-0.0155	0.0057	0.0065	770266
rs6973093	7:33499822	BBS9	T/C	0.94563	-0.0106	0.0039	0.0065	675951
rs7777122	7:33438068	BBS9	C/G	0.94849	-0.0107	0.0039	0.0065	676166
rs6497010	15:93479636	CHD2	A/G	0.5305	0.0047	0.0017	0.0065	690002
rs7164668	15:93479291	CHD2	T/C	0.4699	-0.0047	0.0017	0.0065	690068
rs3123510	9:140636333	EHMT1	A/G	0.4174	0.0048	0.0018	0.0065	685652
rs2531741	3:45847458	LZTFL1	A/T	0.5899	-0.0049	0.0018	0.0065	677559
rs6682448	1:243450955	SDCCAG8	T/G	0.6712	-0.005	0.0018	0.0065	692368
rs2064061	3:45871203	LZTFL1	A/G	0.5174	-0.0047	0.0017	0.0066	692542
rs13113055	4:123715828	BBS12	T/C	0.03274	0.0145	0.0053	0.0067	676219
rs17285449	16:56596155	BBS2	T/G	0.08986	0.0084	0.0031	0.0067	680800
rs1507995	4:122748308	BBS7	A/G	0.3178	0.0048	0.0018	0.0067	795043
rs11503324	12:88415845	CEP290	T/C	0.01345	0.0244	0.009	0.0067	509760
rs1320819	15:93487854	CHD2	C/G	0.4699	-0.0047	0.0017	0.0067	688722
rs2272461	15:93522312	CHD2	A/G	0.6747	-0.0051	0.0019	0.0067	675034
rs8035739	15:93479798	CHD2	T/C	0.5298	0.0047	0.0017	0.0067	689858
rs17574616	5:42436807	GHR	C/G	0.7341	0.0052	0.0019	0.0067	691309
rs3764453	5:42398629	GHR	A/G	0.8179	0.0059	0.0022	0.0067	690277
rs4597005	10:112712477	BBIP1	T/C	0.6887	0.005	0.0019	0.0068	689637
rs309400	4:123616189	BBS12	T/C	0.5707	0.0047	0.0017	0.0068	691275
rs715541	22:37116098	IFT27	A/G	0.6438	0.0049	0.0018	0.0068	689940
rs6116726	20:5261399	PROKR2	T/C	0.3836	-0.0048	0.0018	0.0068	691790
rs12602348	17:17547236	RAI1	A/G	0.4146	0.0047	0.0017	0.0068	691958
rs1566441	16:56597636	BBS2	T/G	0.5285	-0.0047	0.0018	0.0069	677693
rs4683148	3:45956060	LZTFL1	T/C	0.405	0.0048	0.0018	0.0069	691586
rs850823	15:23888309	MAGEL2	C/G	0.5564	0.0048	0.0018	0.0069	687743
rs6085086	20:5293126	PROKR2	A/G	0.3484	-0.0048	0.0018	0.0069	690766
rs6107620	20:5325385	PROKR2	T/C	0.95656	-0.0113	0.0042	0.0069	679945
rs8116536	20:5294461	PROKR2	A/G	0.3482	-0.005	0.0018	0.0069	636086
rs946941	10:112378700	SMC3	T/C	0.09653	0.0083	0.0031	0.0069	660567
rs6534323	4:122695888	BBS7	A/G	0.3476	0.005	0.0019	0.007	683601
rs12658985	5:36855106	NIPBL	C/G	0.2349	-0.0055	0.0021	0.007	689711
rs10485484	20:5278869	PROKR2	A/G	0.6169	0.0048	0.0018	0.007	692211
rs953691	4:122813095	BBS7	T/G	0.3423	-0.0048	0.0018	0.0071	687745
rs12437674	15:93494026	CHD2	A/T	0.4736	-0.0047	0.0017	0.0071	688056
rs6092708	20:57517574	GNAS	T/C	0.1835	0.0061	0.0023	0.0071	686291
rs9610875	22:38323507	SOX10	T/G	0.2354	0.0055	0.002	0.0071	691709
rs13389366	2:63349951	WDPCP	A/T	0.1983	0.0058	0.0022	0.0071	687713
rs12426026	12:76761610	BBS10	T/C	0.08922	0.0082	0.0031	0.0072	673394
rs11098646	4:122729301	BBS7	T/C	0.6818	-0.005	0.0019	0.0072	692121
rs7167194	15:93491550	CHD2	A/C	0.4746	-0.0046	0.0017	0.0072	688607
rs6863381	5:42520368	GHR	A/T	0.726	0.0052	0.0019	0.0072	690343
rs11140704	9:87248164	NTRK2	A/G	0.8272	0.0061	0.0023	0.0072	692438
rs11140719	9:87271229	NTRK2	T/C	0.95112	0.0107	0.004	0.0072	692311
rs11140810	9:87574808	NTRK2	T/G	0.4633	-0.0047	0.0018	0.0072	690160
rs726434	9:87247317	NTRK2	A/T	0.8279	0.0061	0.0023	0.0072	692443
rs8920	15:23888891	MAGEL2	A/T	0.4443	-0.0048	0.0018	0.0073	688833
rs3746684	20:5283376	PROKR2	A/G	0.3816	-0.0047	0.0018	0.0073	692351
rs11140802	9:87512376	NTRK2	C/G	0.859	-0.0068	0.0025	0.0074	690128
rs17418241	9:87625848	NTRK2	T/C	0.09606	-0.0079	0.0029	0.0074	690338
rs7272559	20:5286175	PROKR2	A/G	0.3799	-0.0048	0.0018	0.0074	688933
rs7142028	14:89389073	TTC8	A/C	0.5672	0.0047	0.0018	0.0074	689893
rs7159503	14:89388881	TTC8	A/G	0.4329	-0.0045	0.0017	0.0074	781007
rs13131003	4:122813182	BBS7	A/T	0.6577	0.0048	0.0018	0.0075	687687
rs4327000	15:93492811	CHD2	C/G	0.4697	-0.0046	0.0017	0.0075	688294
rs17389082	9:87463326	NTRK2	A/G	0.1487	0.0064	0.0024	0.0075	687819
rs10019721	4:123714849	BBS12	C/G	0.96773	-0.0142	0.0053	0.0076	675910
rs17753687	15:72980550	BBS4	T/C	0.07507	-0.0086	0.0032	0.0076	688215
rs11731917	4:122783233	BBS7	A/G	0.3183	0.005	0.0019	0.0076	692105
rs17005251	4:122750340	BBS7	T/C	0.97732	-0.0144	0.0054	0.0076	661566
rs12346884	9:87509739	NTRK2	A/C	0.8585	-0.0068	0.0025	0.0076	690160
rs2141322	11:8067451	TUB	A/G	0.7785	0.0057	0.0021	0.0076	687717
rs12988017	2:64071600	WDPCP	A/G	0.7613	0.0054	0.002	0.0076	688675
rs11642934	16:56596393	BBS2	T/C	0.08969	0.0083	0.0031	0.0077	680528
rs7686084	4:122764725	BBS7	A/C	0.6823	-0.005	0.0019	0.0077	692288
rs3779241	7:33430008	BBS9	A/G	0.05157	0.0104	0.0039	0.0077	676306
rs7672879	4:122811172	BBS7	A/T	0.3447	-0.0048	0.0018	0.0078	687382
rs11140708	9:87255402	NTRK2	C/G	0.1721	-0.0061	0.0023	0.0078	692515
rs11791654	9:87465791	NTRK2	T/G	0.1525	0.0064	0.0024	0.0078	689311
rs6076813	20:5313082	PROKR2	T/C	0.04338	0.0112	0.0042	0.0078	671631
rs7079511	10:112686323	BBIP1	T/C	0.6887	0.0049	0.0019	0.0079	689211
rs2064560	22:41530040	EP300	A/G	0.7172	-0.0051	0.0019	0.0079	692315
rs11818887	10:112335588	SMC3	A/G	0.04636	-0.011	0.0041	0.0079	678089
rs11604511	11:8055436	TUB	T/C	0.7389	0.005	0.0019	0.0079	790523
rs13133876	4:122814883	BBS7	A/T	0.3423	-0.0048	0.0018	0.008	687763
rs12238423	9:140691283	EHMT1	A/G	0.6919	-0.0058	0.0022	0.008	544110
rs16888439	6:57129124	RAB23	A/T	0.95902	0.012	0.0045	0.008	680304
rs6728488	2:63358260	WDPCP	A/T	0.7972	-0.0058	0.0022	0.008	681328
rs3217753	4:122746325	BBS7	A/G	0.6793	-0.0049	0.0019	0.0081	691871
rs4820428	22:41537589	EP300	A/G	0.718	-0.005	0.0019	0.0081	692454
rs12513643	5:42378916	GHR	A/C	0.8162	0.0058	0.0022	0.0081	691544
rs7722558	5:42644063	GHR	T/C	0.8334	0.0061	0.0023	0.0081	685581
rs6038138	20:5316523	PROKR2	A/G	0.607	-0.0047	0.0018	0.0081	684053
rs13151345	4:122812373	BBS7	T/G	0.6577	0.0048	0.0018	0.0082	687724
rs12592113	15:93458354	CHD2	T/G	0.7819	0.0057	0.0021	0.0082	674171
rs13184352	5:42497622	GHR	T/C	0.2743	-0.0051	0.0019	0.0082	691750
rs12353238	9:87514546	NTRK2	A/C	0.859	-0.0067	0.0025	0.0082	690045
rs2120266	9:87456351	NTRK2	A/G	0.1451	0.0064	0.0024	0.0082	688049
rs4584227	9:87249840	NTRK2	C/G	0.1723	-0.006	0.0023	0.0082	692465
rs3753548	1:243541698	SDCCAG8	A/T	0.7444	-0.0053	0.002	0.0082	682363
rs3217771	4:122739483	BBS7	A/G	0.318	0.0049	0.0019	0.0083	692124
rs12594991	15:93516427	CHD2	A/G	0.5258	0.0046	0.0017	0.0083	686621
rs4146837	15:93446869	CHD2	T/C	0.4653	-0.0048	0.0018	0.0083	619289
rs9611505	22:41540279	EP300	T/C	0.718	-0.005	0.0019	0.0083	692472
rs10123809	9:87530271	NTRK2	A/G	0.1408	0.0067	0.0025	0.0083	688916
rs7911129	10:112340871	SMC3	A/G	0.95358	0.0109	0.0041	0.0083	678087
rs282237	16:56588470	BBS2	A/T	0.5139	-0.0047	0.0018	0.0084	654234
rs6854295	4:122716782	BBS7	T/C	0.01672	0.0173	0.0066	0.0084	682956
rs6859653	5:42537284	GHR	T/G	0.2696	-0.0051	0.0019	0.0084	685059
rs7862675	9:87681108	NTRK2	A/G	0.8431	0.0063	0.0024	0.0084	691562
rs7939737	11:8113594	TUB	A/G	0.04671	-0.0106	0.004	0.0084	665468
rs309419	4:123624001	BBS12	C/G	0.5888	0.0046	0.0017	0.0085	691673
rs6838153	4:122720999	BBS7	A/G	0.6698	-0.0049	0.0018	0.0085	691521
rs7686200	4:122764553	BBS7	A/G	0.3178	0.0049	0.0019	0.0085	692188
rs3826036	15:93467391	CHD2	T/C	0.4658	-0.0045	0.0017	0.0085	692566
rs13156541	5:42461964	GHR	C/G	0.7344	0.0051	0.0019	0.0085	691717
rs6026560	20:57426528	GNAS	T/C	0.8007	0.0059	0.0023	0.0085	635464
rs309406	4:123618707	BBS12	A/G	0.5707	0.0045	0.0017	0.0086	692573
rs13143218	4:122820075	BBS7	A/C	0.3423	-0.0048	0.0018	0.0086	688749
rs2063165	4:122750005	BBS7	A/G	0.6822	-0.0049	0.0019	0.0086	691620
rs2092563	22:41592677	EP300	A/G	0.2803	0.005	0.0019	0.0086	689371
rs2461328	8:38374393	FGFR1	A/G	0.93978	0.0098	0.0037	0.0086	680406
rs1051881	4:122737965	BBS7	C/G	0.01754	0.0154	0.0059	0.0087	771371
rs17636762	5:42462261	GHR	T/C	0.2658	-0.0051	0.0019	0.0087	691717
rs6891036	5:42382661	GHR	A/G	0.183	-0.0058	0.0022	0.0087	691373
rs8056687	16:56468561	BBS2	T/C	0.579	0.0045	0.0017	0.0088	691434
rs769238	4:122744942	BBS7	A/G	0.3181	0.0049	0.0019	0.0088	691974
rs8035159	15:93407288	CHD2	A/G	0.7041	-0.0047	0.0018	0.0088	774098
rs13153060	5:42381962	GHR	T/C	0.8166	0.0057	0.0022	0.0088	691284
rs2028884	2:63812148	WDPCP	A/G	0.8833	-0.0067	0.0026	0.0088	680142
rs3934536	2:64089373	WDPCP	T/G	0.2388	-0.0053	0.002	0.0088	689563
rs10885068	10:112713815	BBIP1	A/G	0.6887	0.0048	0.0019	0.0089	690689
rs9900673	17:17548633	RAI1	T/C	0.4144	0.0046	0.0017	0.0089	691694
rs7699776	4:122753885	BBS7	A/G	0.6823	-0.0049	0.0019	0.009	692154
rs6885716	5:42382098	GHR	T/C	0.183	-0.0057	0.0022	0.009	691226
rs6026544	20:57394420	GNAS	T/C	0.5357	0.0045	0.0017	0.009	692549
rs780110	2:27685388	IFT172	A/G	0.4433	0.0043	0.0016	0.009	795353
rs2920706	16:56458487	BBS2	T/C	0.5789	0.0045	0.0017	0.0091	691424
rs10941578	5:42543111	GHR	T/C	0.7287	0.0051	0.0019	0.0091	687547
rs13160458	5:42535563	GHR	A/G	0.7303	0.0051	0.0019	0.0092	687284
rs12630101	3:46006158	LZTFL1	A/G	0.6027	-0.0046	0.0018	0.0092	689367
rs11140698	9:87244981	NTRK2	A/G	0.828	0.0059	0.0023	0.0092	692059
rs4578034	9:87587782	NTRK2	T/C	0.5507	0.0045	0.0017	0.0092	687818
rs17619598	2:63940612	WDPCP	A/G	0.2335	0.0053	0.002	0.0092	692378
rs17619855	2:63970462	WDPCP	A/T	0.7675	-0.0053	0.002	0.0092	691916
rs2275998	11:66326581	BBS1	T/C	0.817	0.0058	0.0022	0.0093	692327
rs2445013	8:38373822	FGFR1	C/G	0.05999	-0.0097	0.0037	0.0093	691730
rs1122530	9:87464352	NTRK2	A/G	0.8503	-0.0062	0.0024	0.0093	687628
rs1317500	11:8111121	TUB	T/C	0.07396	0.0089	0.0034	0.0093	663815
rs12475294	2:64095503	WDPCP	T/C	0.2376	-0.0052	0.002	0.0093	689738
rs6015411	20:57522434	GNAS	T/G	0.2135	0.0056	0.0021	0.0094	687109
rs1982841	9:87686259	NTRK2	T/C	0.8431	0.0063	0.0024	0.0094	691456
rs11041740	11:8117518	TUB	T/G	0.2176	0.0054	0.0021	0.0094	685286
rs4671072	2:64087027	WDPCP	A/T	0.2387	-0.0052	0.002	0.0094	689755
rs4777530	15:73032768	BBS4	A/G	0.09179	-0.0079	0.0031	0.0095	691541
rs4876947	9:140693181	EHMT1	A/G	0.3079	0.0049	0.0019	0.0095	690606
rs17241549	6:100864280	SIM1	C/G	0.94545	0.0089	0.0034	0.0095	639057
rs6836544	4:122726073	BBS7	T/C	0.01719	0.0167	0.0065	0.0096	678002
rs9905728	17:17564523	RAI1	T/C	0.4621	-0.0045	0.0017	0.0096	683172
rs12464279	2:63990744	WDPCP	T/G	0.7298	-0.0051	0.002	0.0096	687865
rs4784667	16:56462000	BBS2	A/G	0.5784	0.0045	0.0017	0.0097	692067
rs16917426	8:96247835	C8orf37	T/C	0.96749	0.013	0.005	0.0097	668180
rs7005341	8:96249305	C8orf37	A/G	0.96749	0.0129	0.005	0.0097	679957
rs5758268	22:41622419	EP300	A/T	0.7207	-0.005	0.0019	0.0097	689539
rs309414	4:123620912	BBS12	T/G	0.412	-0.0045	0.0017	0.0098	691681
rs6830453	4:122762824	BBS7	T/C	0.01701	0.0169	0.0065	0.0098	677972
rs12679830	8:38343310	FGFR1	A/T	0.6277	0.0046	0.0018	0.0098	679828
rs3826035	15:93534933	CHD2	A/G	0.531	0.0045	0.0017	0.0099	689893
rs869966	10:112378718	SMC3	T/C	0.90283	-0.0079	0.0031	0.0099	677598
rs11739194	5:132201230	AFF4	T/C	0.6835	0.0047	0.0018	0.01	691292
rs7915214	10:112700887	BBIP1	T/C	0.6883	0.0049	0.0019	0.01	672662
rs8059717	16:56465425	BBS2	T/C	0.5764	0.0045	0.0017	0.01	692026
rs2221628	4:122795361	BBS7	A/G	0.3187	0.0048	0.0019	0.01	692519
rs2022230	7:33119907	BBS9	A/G	0.7062	-0.005	0.0019	0.01	678781
rs1441397	8:96267756	C8orf37	T/C	0.0328	-0.0128	0.005	0.01	680711
rs8042437	15:93547575	CHD2	T/C	0.3345	0.0047	0.0018	0.01	689017
rs17136507	16:3800545	CREBBP	T/C	0.91359	-0.0084	0.0033	0.01	662576
rs2057070	22:41564287	EP300	T/C	0.7174	-0.0049	0.0019	0.01	692417
rs3818003	22:41609690	EP300	T/C	0.2833	0.0049	0.0019	0.01	692519
rs5758267	22:41619350	EP300	A/T	0.2795	0.0049	0.0019	0.01	690013
rs2206660	20:10349971	MKKS	A/G	0.96404	0.0115	0.0045	0.01	689829
rs12238534	9:87547350	NTRK2	T/G	0.135	-0.0065	0.0026	0.01	689109
rs7875184	9:87501098	NTRK2	T/C	0.1412	0.0065	0.0025	0.01	691200
rs920776	9:87538336	NTRK2	A/G	0.1401	-0.0066	0.0026	0.01	676107
rs6076811	20:5306786	PROKR2	A/G	0.04338	0.011	0.0043	0.01	677654
rs7747189	6:100857869	SIM1	A/G	0.2691	0.0049	0.0019	0.01	692590
rs11815960	10:112343116	SMC3	A/G	0.95375	0.0106	0.0041	0.01	678122
rs6997635	8:100776120	VPS13B	T/C	0.05215	-0.0101	0.0039	0.01	674496
rs1671062	11:66281538	BBS1	A/G	0.3998	0.0046	0.0018	0.011	636861
rs309411	4:123620150	BBS12	T/C	0.5893	0.0044	0.0018	0.011	691856
rs921300	4:123705169	BBS12	T/C	0.96919	-0.0136	0.0054	0.011	668700
rs12445477	16:56589859	BBS2	A/G	0.08787	0.0081	0.0032	0.011	677351
rs4783940	16:56451482	BBS2	T/C	0.4211	-0.0044	0.0017	0.011	691637
rs6499837	16:56453981	BBS2	T/C	0.4211	-0.0044	0.0017	0.011	691751
rs769243	4:122741807	BBS7	T/C	0.01719	0.0164	0.0065	0.011	677814
rs17786463	7:33432951	BBS9	A/T	0.8443	0.0061	0.0024	0.011	691748
rs2109525	7:33411267	BBS9	T/G	0.8402	0.006	0.0024	0.011	692222
rs13290032	9:140620222	EHMT1	A/G	0.6477	-0.0046	0.0018	0.011	685235
rs2273085	22:41615376	EP300	T/C	0.2829	0.0049	0.0019	0.011	692647
rs5758264	22:41616284	EP300	T/G	0.7174	-0.0049	0.0019	0.011	692592
rs9611510	22:41569124	EP300	T/C	0.7173	-0.0049	0.0019	0.011	692421
rs9611519	22:41613188	EP300	T/C	0.2823	0.0049	0.0019	0.011	692507
rs2461327	8:38373924	FGFR1	T/G	0.94001	0.0095	0.0037	0.011	691719
rs4365846	5:42547255	GHR	A/G	0.7449	0.005	0.002	0.011	687945
rs4493680	5:42539166	GHR	A/T	0.2714	-0.0054	0.0021	0.011	524246
rs11130076	3:45853072	LZTFL1	T/C	0.4784	0.0044	0.0017	0.011	687094
rs4815787	20:5281807	PROKR2	A/G	0.505	-0.0044	0.0017	0.011	691804
rs6038132	20:5305400	PROKR2	T/C	0.3852	0.0046	0.0018	0.011	673409
rs6516015	20:5292086	PROKR2	T/C	0.5282	0.0044	0.0017	0.011	690775
rs10803138	1:243555219	SDCCAG8	A/G	0.2558	0.0051	0.002	0.011	683832
rs718268	6:100859159	SIM1	T/C	0.7298	-0.0049	0.0019	0.011	692525
rs10484006	14:89382449	TTC8	A/C	0.8323	-0.0059	0.0023	0.011	690508
rs12713474	2:63473443	WDPCP	T/C	0.8925	0.0072	0.0028	0.011	691351
rs12991228	2:63485625	WDPCP	C/G	0.1718	-0.0058	0.0023	0.011	690161
rs2034802	2:63968655	WDPCP	A/G	0.04134	0.0108	0.0042	0.011	677130
rs4544421	2:64097868	WDPCP	T/C	0.7622	0.0051	0.002	0.011	689785
rs1026156	4:123694013	BBS12	T/C	0.03122	0.0135	0.0054	0.012	672512
rs1116224	4:123714231	BBS12	A/G	0.96884	-0.0136	0.0054	0.012	676385
rs377070	4:123629002	BBS12	C/G	0.5918	0.0044	0.0018	0.012	687098
rs921299	4:123704995	BBS12	T/C	0.03081	0.0135	0.0054	0.012	676289
rs1012075	16:56583516	BBS2	T/G	0.7033	-0.0048	0.0019	0.012	692511
rs4783941	16:56511736	BBS2	T/C	0.3922	-0.0044	0.0018	0.012	691852
rs9941309	16:56597215	BBS2	A/T	0.5299	-0.0044	0.0017	0.012	682685
rs2592787	2:170424381	BBS5	T/C	0.7304	-0.0049	0.0019	0.012	691478
rs2683449	2:170426703	BBS5	A/G	0.7315	-0.0049	0.0019	0.012	690257
rs3217767	4:122740989	BBS7	A/G	0.01678	0.0165	0.0066	0.012	677847
rs12903587	15:93455471	CHD2	A/G	0.3742	-0.0043	0.0017	0.012	772114
rs20551	22:41548008	EP300	A/G	0.7179	-0.0048	0.0019	0.012	692626
rs10044169	5:42701986	GHR	A/C	0.7248	0.0052	0.0021	0.012	527958
rs6894082	5:42418258	GHR	T/C	0.1829	-0.0055	0.0022	0.012	691254
rs1928284	6:84809517	MRAP2	T/G	0.01655	-0.0172	0.0068	0.012	521204
rs11140695	9:87240403	NTRK2	A/C	0.8268	0.0057	0.0023	0.012	689384
rs12350350	9:87676170	NTRK2	C/G	0.8435	0.006	0.0024	0.012	691345
rs17777716	20:5290375	PROKR2	C/G	0.4723	-0.0043	0.0017	0.012	690732
rs4815795	20:5319756	PROKR2	T/C	0.6074	-0.0049	0.0019	0.012	522026
rs6053287	20:5290627	PROKR2	A/G	0.5277	0.0043	0.0017	0.012	690857
rs6053291	20:5291760	PROKR2	T/C	0.5282	0.0044	0.0017	0.012	683650
rs6085085	20:5290658	PROKR2	T/C	0.5277	0.0043	0.0017	0.012	690854
rs6085088	20:5293919	PROKR2	A/G	0.5277	0.0044	0.0017	0.012	690595
rs6085121	20:5328833	PROKR2	T/C	0.95709	-0.0105	0.0042	0.012	689431
rs9475804	6:57127760	RAB23	A/G	0.04069	-0.0113	0.0045	0.012	692254
rs8067439	17:17698254	RAI1	A/G	0.6277	0.0051	0.002	0.012	504317
rs9890064	17:17538008	RAI1	A/C	0.5419	0.0044	0.0017	0.012	682677
rs7743566	6:100822271	SIM1	A/G	0.2712	0.0048	0.0019	0.012	691362
rs4904473	14:89377508	TTC8	A/G	0.5526	-0.0047	0.0019	0.012	533099
rs7842833	8:100631262	VPS13B	C/G	0.94756	0.0101	0.004	0.012	674562
rs2421919	2:63477604	WDPCP	A/G	0.8987	0.0071	0.0028	0.012	688372
rs4599090	2:64097881	WDPCP	A/G	0.7622	0.0051	0.002	0.012	689777
rs7719428	5:132180919	AFF4	C/G	0.3175	-0.0045	0.0018	0.013	692203
rs14306	16:56510299	BBS2	A/C	0.3935	-0.0044	0.0018	0.013	691955
rs4784669	16:56481282	BBS2	A/G	0.4093	-0.0043	0.0018	0.013	690845
rs7198524	16:56510601	BBS2	T/C	0.6073	0.0044	0.0018	0.013	691944
rs9929724	16:56535613	BBS2	A/C	0.3923	-0.0044	0.0018	0.013	692288
rs11773450	7:33453711	BBS9	C/G	0.7965	-0.0053	0.0021	0.013	691729
rs2392245	7:33567912	BBS9	T/C	0.3375	0.0045	0.0018	0.013	687135
rs12438635	15:93545934	CHD2	T/C	0.5343	0.0043	0.0017	0.013	690851
rs12554522	9:140692781	EHMT1	A/G	0.3081	0.0047	0.0019	0.013	690152
rs4876899	9:140692336	EHMT1	T/C	0.6932	-0.0046	0.0019	0.013	690841
rs9314635	9:140612997	EHMT1	T/G	0.3808	0.0046	0.0018	0.013	630644
rs10038477	5:42705522	GHR	T/G	0.2752	-0.0052	0.0021	0.013	527913
rs10077296	5:42703486	GHR	A/G	0.7248	0.0052	0.0021	0.013	527911
rs7703713	5:42555931	GHR	A/G	0.2698	-0.0048	0.0019	0.013	692606
rs4665978	2:27648726	IFT172	T/C	0.5565	-0.0041	0.0016	0.013	794759
rs5750285	22:37104248	IFT27	C/G	0.5937	0.0044	0.0018	0.013	692106
rs699329	15:23929120	MAGEL2	A/T	0.3267	0.005	0.002	0.013	580926
rs292180	5:36950259	NIPBL	A/G	0.8087	0.0055	0.0022	0.013	691462
rs293748	5:36900843	NIPBL	A/G	0.1812	-0.0056	0.0023	0.013	691638
rs1948308	9:87616257	NTRK2	A/G	0.5625	0.0043	0.0017	0.013	689387
rs11698641	20:5309321	PROKR2	C/G	0.04373	0.0104	0.0042	0.013	686114
rs2145089	20:5283634	PROKR2	A/G	0.4965	0.0043	0.0017	0.013	692283
rs6053281	20:5289644	PROKR2	A/G	0.4726	-0.0043	0.0017	0.013	690689
rs6076807	20:5292188	PROKR2	A/G	0.4709	-0.0043	0.0017	0.013	690710
rs6516020	20:5294034	PROKR2	T/G	0.5277	0.0043	0.0017	0.013	690673
rs8116897	20:5294496	PROKR2	T/C	0.4722	-0.0043	0.0017	0.013	690278
rs2490393	1:243522906	SDCCAG8	A/G	0.2575	0.005	0.002	0.013	678400
rs6703335	1:243608967	SDCCAG8	A/G	0.4338	-0.0043	0.0017	0.013	691916
rs13213077	6:100816614	SIM1	A/C	0.2712	0.0048	0.0019	0.013	690606
rs1553586	6:100820354	SIM1	A/T	0.2711	0.0048	0.0019	0.013	691081
rs1876155	6:100797890	SIM1	T/G	0.1528	0.0057	0.0023	0.013	778351
rs4145403	6:100859573	SIM1	T/C	0.2693	0.0048	0.0019	0.013	680778
rs9376940	6:100818915	SIM1	A/G	0.2722	0.0047	0.0019	0.013	690928
rs9376963	6:100848319	SIM1	A/C	0.2698	0.0048	0.0019	0.013	692120
rs2554426	15:25219195	SNURF	T/G	0.08735	0.0076	0.0031	0.013	691737
rs2732020	15:25222304	SNURF	A/C	0.08758	0.0076	0.0031	0.013	691531
rs12996320	2:63310229	WDPCP	A/G	0.8792	0.0067	0.0027	0.013	682313
rs7566860	2:63564683	WDPCP	T/C	0.8262	0.0057	0.0023	0.013	689253
rs11748063	5:132200943	AFF4	T/C	0.317	-0.0045	0.0018	0.014	692321
rs1557852	5:132181800	AFF4	A/G	0.3179	-0.0045	0.0018	0.014	692414
rs2015477	2:73847024	ALMS1	A/G	0.93873	-0.0087	0.0035	0.014	728104
rs7666624	4:123706512	BBS12	A/T	0.03075	0.0134	0.0054	0.014	662771
rs921301	4:123705387	BBS12	T/C	0.03151	0.0132	0.0054	0.014	676756
rs769245	4:122741584	BBS7	A/T	0.98386	-0.0162	0.0066	0.014	677617
rs17170220	7:33453144	BBS9	A/C	0.7957	-0.0052	0.0021	0.014	691635
rs17170226	7:33460180	BBS9	T/C	0.2034	0.0052	0.0021	0.014	692018
rs17170229	7:33467830	BBS9	T/C	0.2035	0.0052	0.0021	0.014	691671
rs17398949	7:33379807	BBS9	A/T	0.8439	0.0059	0.0024	0.014	690632
rs6965729	7:33459531	BBS9	A/G	0.2034	0.0053	0.0021	0.014	691489
rs10852181	15:93412778	CHD2	C/G	0.1444	0.0062	0.0025	0.014	682973
rs1406714	15:93461371	CHD2	C/G	0.4391	0.0043	0.0017	0.014	688011
rs7170644	15:93559178	CHD2	A/G	0.3118	0.0047	0.0019	0.014	687187
rs7743	15:93441267	CHD2	A/G	0.5648	-0.0044	0.0018	0.014	672158
rs6002271	22:41566595	EP300	T/C	0.2826	0.0047	0.0019	0.014	691555
rs6064709	20:57379850	GNAS	A/G	0.4977	0.0043	0.0017	0.014	681832
rs8179219	2:27730817	IFT172	A/G	0.05513	0.0092	0.0037	0.014	778725
rs2267362	22:37216482	IFT27	C/G	0.7488	0.0048	0.0019	0.014	765892
rs1860263	3:45832052	LZTFL1	A/T	0.7413	0.0048	0.002	0.014	688450
rs7644870	3:45830886	LZTFL1	A/C	0.7423	0.0048	0.0019	0.014	691651
rs6514111	20:10383981	MKKS	A/G	0.87	0.0066	0.0027	0.014	680475
rs1778913	9:87435737	NTRK2	A/G	0.237	-0.0049	0.002	0.014	688620
rs7036090	9:87617689	NTRK2	A/G	0.5631	0.0043	0.0017	0.014	688403
rs9314735	9:87445656	NTRK2	A/G	0.7704	0.005	0.002	0.014	681690
rs5012083	20:5289802	PROKR2	C/G	0.5293	0.0042	0.0017	0.014	690589
rs6107614	20:5308321	PROKR2	A/G	0.5803	0.0041	0.0017	0.014	777032
rs7273837	20:5289481	PROKR2	T/C	0.5277	0.0042	0.0017	0.014	690839
rs10927013	1:243589156	SDCCAG8	T/G	0.5679	0.0043	0.0017	0.014	687869
rs4145404	6:100859348	SIM1	T/G	0.1432	0.006	0.0025	0.014	679742
rs9386117	6:100815500	SIM1	C/G	0.2716	0.0047	0.0019	0.014	690102
rs9693641	8:100566950	VPS13B	T/C	0.05227	-0.0095	0.0039	0.014	675562
rs13009368	2:63588244	WDPCP	C/G	0.1693	-0.0056	0.0023	0.014	689418
rs1032764	5:132185419	AFF4	A/C	0.6824	0.0045	0.0018	0.015	692240
rs1910075	5:132180089	AFF4	A/T	0.6825	0.0045	0.0018	0.015	692282
rs2023895	5:132231528	AFF4	A/G	0.6366	0.0043	0.0018	0.015	692492
rs8432	11:66299515	BBS1	A/G	0.3998	0.0044	0.0018	0.015	637810
rs309403	4:123616822	BBS12	T/C	0.4107	-0.0042	0.0017	0.015	691732
rs6534362	4:123702879	BBS12	T/C	0.03122	0.0133	0.0054	0.015	670136
rs2683453	2:170416393	BBS5	A/G	0.6058	-0.0042	0.0018	0.015	691877
rs6738934	2:170377737	BBS5	A/G	0.2702	0.0047	0.0019	0.015	690645
rs11764921	7:33499462	BBS9	T/C	0.2048	0.0052	0.0021	0.015	680356
rs13236885	7:33460336	BBS9	T/C	0.7966	-0.0051	0.0021	0.015	692019
rs17170225	7:33459157	BBS9	A/G	0.2034	0.0051	0.0021	0.015	692017
rs17170247	7:33487446	BBS9	A/G	0.7957	-0.0052	0.0021	0.015	689769
rs7779232	7:33480600	BBS9	A/G	0.8436	0.0058	0.0024	0.015	691697
rs10867068	9:140682881	EHMT1	T/C	0.6916	-0.0046	0.0019	0.015	690998
rs11137225	9:140675956	EHMT1	T/C	0.6916	-0.0045	0.0019	0.015	686428
rs12686658	9:140691516	EHMT1	T/C	0.6921	-0.0046	0.0019	0.015	691334
rs4876945	9:140690515	EHMT1	T/C	0.692	-0.0045	0.0019	0.015	691361
rs4979648	9:140667271	EHMT1	A/G	0.3067	0.0045	0.0019	0.015	685786
rs11090039	22:41496800	EP300	A/G	0.2818	0.0047	0.0019	0.015	689787
rs748951	20:57381439	GNAS	T/C	0.5016	-0.0042	0.0017	0.015	681593
rs911302	20:57387434	GNAS	T/C	0.4638	-0.0042	0.0017	0.015	687319
rs215970	6:84714136	MRAP2	A/C	0.9772	-0.0154	0.0063	0.015	611461
rs396542	5:36828730	NIPBL	A/G	0.7248	0.0048	0.0019	0.015	692548
rs6861906	5:37075936	NIPBL	T/C	0.8071	0.0054	0.0022	0.015	689990
rs1006446	9:87566393	NTRK2	A/C	0.1432	-0.0061	0.0025	0.015	686994
rs12348710	9:87554605	NTRK2	T/C	0.8649	0.0061	0.0025	0.015	691130
rs1490402	9:87673253	NTRK2	T/C	0.8436	0.0059	0.0024	0.015	691948
rs7048015	9:87478135	NTRK2	A/C	0.8091	-0.0053	0.0022	0.015	688178
rs6053326	20:5320979	PROKR2	A/C	0.6097	-0.0047	0.0019	0.015	522038
rs6085077	20:5286793	PROKR2	A/G	0.4964	0.0042	0.0017	0.015	689876
rs6085110	20:5314026	PROKR2	A/G	0.95633	-0.0101	0.0042	0.015	677646
rs7744316	6:57081878	RAB23	A/G	0.8044	-0.0055	0.0023	0.015	673485
rs13021852	2:63562115	WDPCP	A/G	0.8089	0.0053	0.0022	0.015	680158
rs2421547	2:73641088	ALMS1	T/G	0.06297	0.0081	0.0034	0.016	792479
rs4918614	10:112704740	BBIP1	A/G	0.6704	0.0048	0.002	0.016	524212
rs16997714	4:123703725	BBS12	A/G	0.96843	-0.0128	0.0053	0.016	676165
rs309396	4:123614282	BBS12	T/C	0.5896	0.0042	0.0018	0.016	688501
rs309401	4:123616211	BBS12	A/G	0.3396	0.0044	0.0018	0.016	689340
rs427081	4:123630743	BBS12	A/G	0.6599	-0.0044	0.0018	0.016	689908
rs13230868	7:33449891	BBS9	A/C	0.7963	-0.0051	0.0021	0.016	691626
rs13239022	7:33452002	BBS9	A/G	0.2038	0.0051	0.0021	0.016	691715
rs17170189	7:33370588	BBS9	A/G	0.91043	0.0074	0.0031	0.016	691648
rs6966188	7:33459773	BBS9	A/G	0.2044	0.0051	0.0021	0.016	692106
rs929524	7:33440019	BBS9	A/T	0.7962	-0.0051	0.0021	0.016	691587
rs2304655	15:93435225	CHD2	T/C	0.5645	-0.0042	0.0018	0.016	679823
rs6559225	9:140687468	EHMT1	A/G	0.6919	-0.0045	0.0019	0.016	692329
rs4395642	5:42552431	GHR	T/C	0.254	-0.0048	0.002	0.016	690861
rs911300	20:57387262	GNAS	A/G	0.4636	-0.0042	0.0017	0.016	686994
rs11168828	12:49422795	KMT2D	A/G	0.08378	-0.0087	0.0036	0.016	594668
rs4683142	3:45852376	LZTFL1	C/G	0.8007	0.0052	0.0022	0.016	685640
rs1547	20:10386059	MKKS	A/G	0.1098	-0.0066	0.0027	0.016	692597
rs2480207	6:84817365	MRAP2	A/G	0.98287	0.0163	0.0068	0.016	517414
rs11140803	9:87512669	NTRK2	A/G	0.1748	0.0059	0.0025	0.016	675407
rs729705	9:87440490	NTRK2	A/G	0.228	-0.0049	0.002	0.016	686555
rs6053298	20:5295475	PROKR2	A/G	0.5294	0.0042	0.0017	0.016	688063
rs1506082	6:100819748	SIM1	C/G	0.7244	-0.0046	0.0019	0.016	679282
rs1506083	6:100819234	SIM1	A/T	0.729	-0.0047	0.0019	0.016	679240
rs9390325	6:100817828	SIM1	T/C	0.2711	0.0047	0.0019	0.016	678967
rs10037865	5:132230024	AFF4	A/G	0.7982	0.0054	0.0023	0.017	671344
rs1410057	10:112691147	BBIP1	C/G	0.2354	-0.0048	0.002	0.017	691290
rs7095404	10:112707103	BBIP1	A/G	0.7646	0.0048	0.002	0.017	691311
rs411043	4:123633221	BBS12	C/G	0.5889	0.0045	0.0019	0.017	528113
rs370151	16:56561494	BBS2	T/G	0.6147	0.0042	0.0018	0.017	691812
rs1803183	4:122735142	BBS7	A/G	0.98293	-0.0143	0.006	0.017	766505
rs10486530	7:33398033	BBS9	A/G	0.7958	-0.0051	0.0021	0.017	691898
rs11769616	7:33392380	BBS9	A/G	0.7965	-0.0051	0.0021	0.017	691880
rs11773504	7:33388713	BBS9	A/G	0.2043	0.0051	0.0021	0.017	685123
rs13234292	7:33417120	BBS9	A/T	0.203	0.0051	0.0021	0.017	691394
rs17170253	7:33494963	BBS9	T/C	0.205	0.0051	0.0021	0.017	689267
rs3915352	7:33138472	BBS9	T/C	0.7877	-0.0052	0.0022	0.017	676371
rs11634566	15:93530415	CHD2	A/G	0.4685	-0.0041	0.0017	0.017	690117
rs7023287	9:140689373	EHMT1	A/G	0.3081	0.0045	0.0019	0.017	692318
rs2269511	22:37210656	IFT27	T/C	0.2239	-0.0051	0.0021	0.017	663232
rs1545	20:10386013	MKKS	A/C	0.1093	-0.0065	0.0027	0.017	692471
rs6108553	20:10386737	MKKS	A/T	0.1093	-0.0065	0.0027	0.017	692516
rs1187287	9:87414794	NTRK2	A/G	0.2012	-0.0051	0.0021	0.017	692435
rs1187332	9:87269362	NTRK2	A/G	0.1415	-0.0059	0.0025	0.017	686601
rs12342902	9:87554440	NTRK2	T/C	0.1355	-0.0061	0.0025	0.017	690195
rs6053299	20:5295770	PROKR2	A/G	0.5289	0.0041	0.0017	0.017	688261
rs17619717	2:63943257	WDPCP	A/G	0.4197	-0.0042	0.0017	0.017	689291
rs6546008	2:63733387	WDPCP	A/G	0.0397	0.0103	0.0044	0.017	670372
rs1581886	10:112707707	BBIP1	T/C	0.7613	0.0048	0.002	0.018	691147
rs1671063	11:66272142	BBS1	A/G	0.4014	0.0042	0.0018	0.018	691347
rs8023358	15:73052845	BBS4	A/G	0.8454	0.0058	0.0024	0.018	692336
rs3217773	4:122739121	BBS7	A/G	0.682	-0.0045	0.0019	0.018	636622
rs10464225	7:33438036	BBS9	A/G	0.2047	0.005	0.0021	0.018	691664
rs12056267	7:33483245	BBS9	A/G	0.2046	0.005	0.0021	0.018	689770
rs1419923	7:33488262	BBS9	A/C	0.2048	0.0051	0.0021	0.018	689829
rs17170246	7:33484983	BBS9	T/C	0.7952	-0.005	0.0021	0.018	689855
rs4723274	7:33235084	BBS9	T/C	0.3446	0.0043	0.0018	0.018	689085
rs6968365	7:33418118	BBS9	A/G	0.7961	-0.005	0.0021	0.018	691342
rs1045777	9:140512555	EHMT1	A/G	0.1939	0.0053	0.0022	0.018	687285
rs11137226	9:140678227	EHMT1	T/C	0.6917	-0.0044	0.0019	0.018	692328
rs12004293	9:140677678	EHMT1	T/C	0.6911	-0.0044	0.0019	0.018	692320
rs12521020	5:42565843	GHR	T/C	0.2695	-0.0046	0.0019	0.018	690644
rs2972393	5:42496257	GHR	A/G	0.4282	-0.0041	0.0017	0.018	689795
rs7735889	5:42562199	GHR	A/G	0.7296	0.0046	0.0019	0.018	691557
rs13831	20:57475191	GNAS	A/G	0.297	0.0046	0.0019	0.018	687540
rs1894512	22:37108543	IFT27	A/G	0.2694	-0.0046	0.002	0.018	691098
rs9548	9:139317823	INPP5E	T/C	0.176	0.0053	0.0022	0.018	692071
rs6104602	20:10388941	MKKS	T/C	0.8907	0.0065	0.0027	0.018	692507
rs6108546	20:10384115	MKKS	T/C	0.8892	0.0064	0.0027	0.018	692554
rs6108561	20:10396488	MKKS	T/C	0.8907	0.0065	0.0027	0.018	692582
rs6133907	20:10388506	MKKS	A/G	0.1093	-0.0065	0.0027	0.018	692603
rs6133915	20:10392273	MKKS	A/G	0.1089	-0.0065	0.0027	0.018	692605
rs6133919	20:10396101	MKKS	T/C	0.8907	0.0065	0.0027	0.018	692582
rs6133921	20:10400753	MKKS	A/G	0.8908	0.0065	0.0027	0.018	692526
rs11140771	9:87443362	NTRK2	A/G	0.2304	-0.005	0.0021	0.018	673414
rs12340212	9:87551964	NTRK2	A/G	0.1394	-0.006	0.0025	0.018	687813
rs1443441	9:87405888	NTRK2	T/C	0.7028	0.0046	0.0019	0.018	672338
rs17087789	9:87478710	NTRK2	T/C	0.8402	-0.0056	0.0023	0.018	689223
rs3780634	9:87488718	NTRK2	A/G	0.8397	-0.0055	0.0023	0.018	692169
rs6786206	3:71882642	PROK2	T/C	0.1458	0.006	0.0025	0.018	676272
rs11195165	10:112281955	SMC3	A/T	0.95884	0.0107	0.0045	0.018	650163
rs11819139	10:112331272	SMC3	A/G	0.04636	-0.0093	0.0039	0.018	725819
rs17700521	14:89315875	TTC8	C/G	0.7298	0.0046	0.002	0.018	690714
rs4318375	2:64044827	WDPCP	T/C	0.5256	0.0041	0.0017	0.018	687472
rs7082572	10:112699394	BBIP1	A/G	0.2354	-0.0047	0.002	0.019	691811
rs416556	4:123629427	BBS12	A/C	0.3416	0.0043	0.0018	0.019	689747
rs2071005	16:56598904	BBS2	A/G	0.5372	-0.0041	0.0017	0.019	687608
rs762604	16:56602671	BBS2	T/C	0.3063	-0.0044	0.0019	0.019	676249
rs2460867	2:170409326	BBS5	T/C	0.6078	-0.0041	0.0018	0.019	692094
rs2683450	2:170384622	BBS5	A/C	0.3963	0.0041	0.0018	0.019	690636
rs10486525	7:33320441	BBS9	T/C	0.08665	-0.0072	0.0031	0.019	692521
rs10486529	7:33396752	BBS9	A/G	0.2044	0.005	0.0021	0.019	691967
rs11763712	7:33392965	BBS9	A/G	0.2031	0.005	0.0021	0.019	691842
rs11764582	7:33386455	BBS9	A/G	0.7956	-0.005	0.0021	0.019	691851
rs12155389	7:33357730	BBS9	A/G	0.08618	-0.0072	0.0031	0.019	691284
rs1419899	7:33408832	BBS9	A/G	0.7946	-0.005	0.0021	0.019	691857
rs4270863	7:33389239	BBS9	T/C	0.2043	0.005	0.0021	0.019	691995
rs17525249	15:93472980	CHD2	T/C	0.91546	0.0074	0.0031	0.019	690910
rs10780189	9:140678034	EHMT1	A/G	0.3069	0.0044	0.0019	0.019	692214
rs10867062	9:140659404	EHMT1	A/C	0.6919	-0.0044	0.0019	0.019	690639
rs11137223	9:140673666	EHMT1	A/G	0.6917	-0.0044	0.0019	0.019	692150
rs3934534	9:140694542	EHMT1	T/C	0.2827	0.0045	0.0019	0.019	681085
rs6559222	9:140684139	EHMT1	T/C	0.6919	-0.0044	0.0019	0.019	692292
rs17574650	5:42436916	GHR	A/C	0.8946	-0.0068	0.0029	0.019	673767
rs7707913	5:42584852	GHR	T/C	0.251	-0.0046	0.002	0.019	687002
rs2531747	3:45828586	LZTFL1	T/C	0.4539	0.0039	0.0017	0.019	780612
rs13433220	20:10400313	MKKS	A/G	0.8907	0.0064	0.0027	0.019	692596
rs13433221	20:10400280	MKKS	T/C	0.1093	-0.0064	0.0027	0.019	692596
rs16991547	20:10394046	MKKS	A/G	0.1118	-0.0064	0.0027	0.019	692380
rs6108563	20:10398889	MKKS	A/C	0.8907	0.0065	0.0027	0.019	692572
rs1078947	9:87563252	NTRK2	T/C	0.1437	-0.0059	0.0025	0.019	688552
rs1662701	9:87433151	NTRK2	T/G	0.228	-0.0048	0.002	0.019	688251
rs2378676	9:87619423	NTRK2	A/C	0.4394	-0.0041	0.0017	0.019	688446
[truncated: 5,268 more rows]

## Sheet: 5B
Supplementary Table 5B. Summary statistics of all selected tagSNPs using a ±50kb gene definition. Significant associations (P<2.66×10-5) are highlighted in grey.
SNP	Chr:position	n Tagged SNPs	Gene	Alleles	EAF	β	SE	P	N
rs6265	11:27679916	7	BDNF	T/C	0.1951	-0.0412	0.0021	1e-86	795458
rs7103411	11:27700125	15	BDNF	T/C	0.7841	0.0385	0.002	1.6e-82	795623
rs4074134	11:27647285	16	BDNF	T/C	0.2089	-0.0377	0.002	5.8e-78	795578
rs925946	11:27667202	10	BDNF	T/G	0.3088	0.029	0.0018	2.2e-61	795513
rs4788099	16:28855727	28	SH2B1	A/G	0.5963	-0.0269	0.0017	4.8e-59	795572
rs7359397	16:28885659	27	SH2B1	T/C	0.4021	0.0267	0.0017	4.9e-58	795625
rs10835211	11:27701365	3	BDNF	A/G	0.261	0.0289	0.0019	2e-54	795539
rs10734394	11:27628412	0	BDNF	A/G	0.7588	0.0292	0.0019	1.8e-52	792798
rs11646653	16:28922149	7	SH2B1	T/C	0.6606	-0.0249	0.0017	1.4e-46	794902
rs7116850	11:27645530	3	BDNF	A/G	0.729	0.0263	0.0018	2.4e-46	795214
rs12288512	11:27747671	2	BDNF	A/G	0.2028	0.0281	0.002	8.6e-44	794179
rs11030075	11:27627296	0	BDNF	C/G	0.7686	-0.0266	0.0019	4.4e-43	793636
rs12716974	16:29944832	6	KCTD13	A/G	0.5405	0.022	0.0017	3.4e-37	692535
rs11150577	16:29986525	7	KCTD13	A/G	0.4518	0.0216	0.0017	3.6e-36	692494
rs12807253	11:27628269	0	BDNF	A/G	0.09775	-0.0353	0.003	2.2e-32	765699
rs7498491	16:28844068	2	SH2B1	A/T	0.6565	0.0192	0.0017	1e-28	793260
rs4788199	16:29970857	0	KCTD13	C/G	0.4759	-0.018	0.0017	2.1e-25	684897
rs11647753	16:29928115	1	KCTD13	A/G	0.3817	-0.0178	0.0018	9.6e-24	690444
rs2277598	15:73027478	11	BBS4	T/C	0.3559	-0.0161	0.0018	2.2e-19	692591
rs730180	15:73007893	2	BBS4	A/G	0.7886	0.0176	0.002	5.4e-19	792607
rs9806742	15:73051219	7	BBS4	A/G	0.8826	0.0208	0.0026	1.4e-15	692509
rs6704286	1:243678389	2	SDCCAG8	T/G	0.145	0.0203	0.0026	2.8e-15	690606
rs3850988	15:72989224	2	BBS4	A/G	0.2551	-0.0141	0.0019	4.9e-14	791754
rs8026559	15:72976511	0	BBS4	A/T	0.2712	-0.0144	0.0019	1.1e-13	689794
rs3794701	16:3730578	0	CREBBP	A/G	0.4771	-0.0128	0.0017	1.8e-13	682455
rs12917712	16:29882490	1	KCTD13	T/C	0.3296	0.0134	0.0018	3e-13	692496
rs7549780	1:243712455	1	SDCCAG8	A/C	0.3247	0.0133	0.0018	7.1e-13	689370
rs10835219	11:27791178	0	BDNF	A/C	0.639	0.013	0.0019	2.2e-12	664064
rs908867	11:27745764	1	BDNF	T/C	0.09594	0.0187	0.0027	6.7e-12	794383
rs7939810	11:27633409	0	BDNF	T/C	0.6377	0.0117	0.0017	7.9e-12	791415
rs4787483	16:29885447	3	KCTD13	A/G	0.6546	-0.0124	0.0018	1e-11	691316
rs7523742	1:243688150	0	SDCCAG8	A/G	0.0922	0.0206	0.0031	4.1e-11	691627
rs8049949	16:56530377	13	BBS2	A/G	0.8652	-0.0164	0.0025	7.4e-11	692333
rs12374612	6:100955752	1	SIM1	T/C	0.4739	0.0111	0.0017	1.3e-10	686656
rs1635404	16:3747042	0	CREBBP	T/G	0.6925	0.0121	0.0019	1.6e-10	691805
rs6500550	16:3746241	0	CREBBP	T/C	0.3005	0.012	0.0019	2.4e-10	684834
rs1147194	9:87272731	8	NTRK2	T/C	0.196	-0.0136	0.0022	3.5e-10	692607
rs11792069	9:140646121	0	EHMT1	A/G	0.83	0.0145	0.0024	6.5e-10	644252
rs2997494	1:243614681	0	SDCCAG8	A/G	0.08986	0.0198	0.0032	8e-10	680483
rs7975791	12:49413486	0	KMT2D	T/C	0.03601	-0.0264	0.0043	1.1e-09	770139
rs3006927	1:243657399	1	SDCCAG8	T/C	0.8332	-0.0147	0.0024	1.2e-09	691638
rs1619120	9:87302196	7	NTRK2	A/G	0.4013	-0.0099	0.0017	2.4e-09	791760
rs12628891	22:38317137	0	SOX10	T/C	0.3169	-0.0112	0.0019	3e-09	686575
rs747973	16:29875241	0	KCTD13	A/G	0.6949	-0.0113	0.0019	5.6e-09	674448
rs12029086	1:243564722	21	SDCCAG8	T/G	0.1421	-0.0142	0.0025	6.6e-09	692525
rs4671457	2:63346356	2	WDPCP	T/C	0.4166	0.0101	0.0018	7.4e-09	684558
rs240766	6:100954036	1	SIM1	A/G	0.5475	0.0098	0.0017	1.5e-08	686166
rs1857859	6:100894587	10	SIM1	A/G	0.2701	-0.0103	0.0018	1.7e-08	795389
rs1728918	2:27635463	0	IFT172	A/G	0.2717	-0.0114	0.002	2.2e-08	572468
rs4820429	22:41538111	3	EP300	C/G	0.285	-0.0107	0.0019	2.3e-08	691942
rs1129700	16:29918034	1	KCTD13	T/C	0.4373	-0.0099	0.0018	2.3e-08	677226
rs1187343	9:87308783	2	NTRK2	A/G	0.6221	0.0099	0.0018	2.3e-08	692591
rs2918626	9:87328983	17	NTRK2	T/C	0.4662	-0.0091	0.0016	2.3e-08	794721
rs881301	8:38332318	0	FGFR1	T/C	0.5818	-0.0097	0.0017	2.4e-08	691753
rs780094	2:27741237	3	IFT172	T/C	0.3934	-0.0093	0.0017	2.5e-08	795482
rs1054442	12:49389320	0	KMT2D	A/C	0.6178	-0.0103	0.0018	2.5e-08	625990
rs11644679	16:56490549	8	BBS2	A/G	0.1681	0.0122	0.0022	2.9e-08	790999
rs3829541	16:3730499	1	CREBBP	C/G	0.5402	-0.0097	0.0017	2.9e-08	682952
rs10875912	12:49416944	3	KMT2D	T/C	0.6355	-0.01	0.0018	3.3e-08	690454
rs3026659	22:38396220	0	SOX10	T/C	0.3649	-0.01	0.0018	3.4e-08	683489
rs6580699	12:49478812	5	KMT2D	T/G	0.5544	-0.0095	0.0017	3.6e-08	692518
rs7201929	16:28871966	2	SH2B1	T/C	0.7566	0.0105	0.0019	4.6e-08	794892
rs1847912	6:100880696	1	SIM1	A/G	0.7567	0.0108	0.002	7.6e-08	690617
rs139457	22:41610667	36	EP300	T/C	0.6253	0.0096	0.0018	7.7e-08	692617
rs10868219	9:87246283	0	NTRK2	A/G	0.7178	0.0101	0.0019	1.2e-07	691495
rs7773661	6:100919209	13	SIM1	A/G	0.4573	-0.0091	0.0017	1.2e-07	692598
rs10173115	2:63355520	0	WDPCP	A/T	0.465	0.0091	0.0017	1.3e-07	684346
rs10783302	12:49498130	6	KMT2D	T/G	0.3727	0.0095	0.0018	1.5e-07	691013
rs2994322	1:243639018	0	SDCCAG8	C/G	0.8048	-0.0121	0.0023	1.8e-07	672797
rs2108430	16:3738078	0	CREBBP	T/C	0.2599	0.0102	0.002	2.7e-07	683601
rs6026567	20:57444915	0	GNAS	A/G	0.571	-0.0092	0.0018	4.4e-07	659708
rs7513566	1:243588601	20	SDCCAG8	T/C	0.1528	-0.0114	0.0023	5e-07	793570
rs17765088	3:45943595	0	LZTFL1	C/G	0.8817	-0.0136	0.0027	5.7e-07	666309
rs12151606	2:63430175	104	WDPCP	T/C	0.6952	-0.0089	0.0018	6.3e-07	792363
rs7959831	12:49474232	1	KMT2D	T/G	0.1477	-0.0122	0.0025	7.2e-07	673479
rs1001905	9:87272519	11	NTRK2	A/G	0.108	-0.0136	0.0028	8.7e-07	692574
rs2072379	16:3738887	0	CREBBP	T/C	0.6697	0.0091	0.0019	1e-06	691256
rs780092	2:27743154	2	IFT172	A/G	0.8458	-0.0107	0.0022	1e-06	795511
rs4877877	9:87363424	22	NTRK2	C/G	0.304	-0.0092	0.0019	1.1e-06	689238
rs3778037	6:100844095	20	SIM1	T/C	0.6502	-0.0087	0.0018	1.1e-06	692600
rs2421916	2:63447682	1	WDPCP	T/G	0.6261	0.0082	0.0017	1.1e-06	787706
rs1852029	15:23947116	3	NDN	T/G	0.515	-0.0085	0.0018	1.3e-06	673355
rs11899999	2:63601292	31	WDPCP	A/G	0.4401	0.0083	0.0017	1.4e-06	692563
rs699330	15:23936670	2	MAGEL2	T/G	0.3944	0.0088	0.0018	1.5e-06	658946
rs1031221	2:63742810	93	WDPCP	T/C	0.2875	0.0091	0.0019	1.5e-06	691882
rs752579	17:17660347	3	RAI1	T/C	0.6077	0.0082	0.0017	1.6e-06	781905
rs1778933	9:87324411	0	NTRK2	T/C	0.6714	0.0088	0.0018	1.8e-06	691087
rs10868231	9:87474397	1	NTRK2	A/G	0.7095	-0.0084	0.0018	2.6e-06	791825
rs2304275	12:49442813	0	KMT2D	T/C	0.699	-0.0092	0.002	2.8e-06	628516
rs6702894	1:243608642	0	SDCCAG8	A/G	0.7878	0.0098	0.0021	2.9e-06	691194
rs11168854	12:49485373	5	KMT2D	C/G	0.6348	-0.008	0.0017	3.2e-06	791378
rs9403711	6:100824183	10	SIM1	A/G	0.2254	0.0095	0.002	3.2e-06	692606
rs677488	11:66324762	8	BBS1	T/C	0.5445	-0.008	0.0017	3.3e-06	692582
rs1488831	11:27637014	2	BDNF	T/G	0.06051	0.0158	0.0034	3.8e-06	787580
rs1387144	11:27635319	2	BDNF	A/C	0.5938	0.0076	0.0017	4.8e-06	792607
rs2422011	2:63774989	91	WDPCP	A/G	0.2847	0.0084	0.0018	4.8e-06	777710
rs7756421	6:57034009	4	RAB23	A/G	0.8553	-0.0111	0.0024	5.2e-06	692235
rs10209140	2:63922369	4	WDPCP	A/G	0.3623	-0.0081	0.0018	5.3e-06	692415
rs17244217	11:27791110	0	BDNF	T/G	0.2648	0.0089	0.002	5.4e-06	677654
rs5758211	22:41466229	3	EP300	T/C	0.7816	0.0095	0.0021	6.1e-06	691991
rs10783299	12:49390677	8	KMT2D	T/C	0.6036	-0.0077	0.0017	6.2e-06	746435
rs129336	22:37155457	6	IFT27	A/C	0.268	-0.0088	0.002	6.6e-06	692642
rs17060562	6:100870786	0	SIM1	T/C	0.96632	-0.0215	0.0048	8e-06	690374
rs1209068	9:87340518	1	NTRK2	T/C	0.1719	-0.0103	0.0023	8.1e-06	688082
rs12625436	20:57445213	0	GNAS	A/G	0.3944	0.008	0.0018	8.7e-06	680762
rs6519095	22:38431917	5	SOX10	A/G	0.5624	-0.0077	0.0017	9e-06	690891
rs1547226	6:57057183	0	RAB23	T/C	0.18	0.0102	0.0023	9.3e-06	685694
rs3818717	17:17707105	0	RAI1	T/C	0.4259	-0.0078	0.0018	9.4e-06	683243
rs692892	11:66348503	0	BBS1	T/C	0.5158	0.0076	0.0017	1e-05	691755
rs262527	2:63900292	89	WDPCP	C/G	0.728	-0.0081	0.0018	1e-05	783560
rs1722793	15:23949665	1	NDN	T/C	0.6207	-0.0081	0.0018	1.1e-05	672339
rs10926986	1:243467611	5	SDCCAG8	T/G	0.1567	-0.0105	0.0024	1.1e-05	691322
rs12470121	2:63633443	24	WDPCP	A/G	0.4187	-0.0071	0.0016	1.2e-05	795505
rs11140706	9:87248648	14	NTRK2	A/C	0.5508	0.0075	0.0017	1.4e-05	692552
rs2072859	22:38322350	0	SOX10	T/C	0.3894	0.0077	0.0018	1.5e-05	690430
rs1471962	3:45949187	0	LZTFL1	C/G	0.1722	0.0102	0.0024	1.6e-05	664262
rs6559823	9:87348215	5	NTRK2	A/G	0.2598	-0.0085	0.002	1.6e-05	691209
rs1881235	11:8103991	0	TUB	A/G	0.96761	-0.0191	0.0044	1.6e-05	677528
rs2278718	2:63815801	13	WDPCP	A/C	0.7535	0.0085	0.002	1.6e-05	692439
rs11649804	17:17696755	1	RAI1	A/C	0.3032	-0.0082	0.0019	1.7e-05	692243
rs11950813	5:42742905	32	GHR	A/G	0.2772	0.0082	0.0019	1.9e-05	692150
rs1187327	9:87288540	17	NTRK2	T/C	0.4305	-0.0074	0.0017	1.9e-05	692294
rs6116750	20:5303842	1	PROKR2	T/C	0.5744	0.0076	0.0018	1.9e-05	678450
rs12119001	1:243601935	17	SDCCAG8	T/C	0.1679	-0.0098	0.0023	1.9e-05	692214
rs6545977	2:63301164	0	WDPCP	A/G	0.4875	-0.0073	0.0017	1.9e-05	692527
rs3817588	2:27731212	0	IFT172	T/C	0.8061	-0.0089	0.0021	2.2e-05	783398
rs6702982	1:243608667	10	SDCCAG8	A/G	0.8258	0.0097	0.0023	2.4e-05	691915
rs7652331	3:45962752	2	LZTFL1	T/C	0.3462	-0.0075	0.0018	2.6e-05	691348
rs12479894	20:57442694	2	GNAS	A/G	0.97205	-0.0218	0.0052	2.8e-05	689394
rs13002109	2:63346702	0	WDPCP	A/C	0.5112	-0.0072	0.0017	2.8e-05	684186
rs6741584	2:63926459	6	WDPCP	T/C	0.5449	-0.0072	0.0017	2.8e-05	688261
rs1406713	15:93461263	1	CHD2	C/G	0.1957	0.0092	0.0022	2.9e-05	688196
rs2531748	3:45819837	1	LZTFL1	A/G	0.6601	-0.0079	0.0019	2.9e-05	668052
rs4821995	22:41461836	0	EP300	A/G	0.3388	-0.0076	0.0018	3.1e-05	690168
rs4623938	11:8109415	3	TUB	T/C	0.03221	0.0186	0.0045	3.1e-05	678267
rs2053359	15:93540997	7	CHD2	T/C	0.7444	-0.0083	0.002	3.2e-05	690543
rs6546023	2:63919883	8	WDPCP	T/C	0.743	0.0082	0.002	3.3e-05	685043
rs10203263	2:63454401	11	WDPCP	A/C	0.2267	0.0084	0.002	3.7e-05	692415
rs12900461	15:93552656	14	CHD2	T/C	0.8283	-0.0095	0.0023	3.8e-05	692407
rs2009667	22:37171611	0	IFT27	A/G	0.4495	-0.0074	0.0018	3.8e-05	674064
rs4244601	17:17625318	0	RAI1	A/G	0.1359	-0.0103	0.0025	3.8e-05	795255
rs720856	17:17645951	0	RAI1	C/G	0.7554	0.0086	0.0021	3.9e-05	684368
rs10486527	7:33380673	2	BBS9	T/C	0.6938	0.0073	0.0018	4e-05	792113
rs17060534	6:100862051	9	SIM1	A/G	0.08536	0.0128	0.0031	4.1e-05	692180
rs10081630	9:87328898	31	NTRK2	A/T	0.03455	0.0187	0.0046	4.9e-05	691161
rs139879	22:38364552	18	SOX10	T/C	0.371	0.0072	0.0018	5e-05	692544
rs7171728	15:73050820	2	BBS4	C/G	0.7609	0.0082	0.002	5.4e-05	691243
rs728633	11:27781979	0	BDNF	A/G	0.7696	-0.0083	0.0021	5.4e-05	679684
rs11656775	17:17654319	2	RAI1	A/G	0.3268	-0.0071	0.0018	5.6e-05	788532
rs11789677	9:87238610	1	NTRK2	A/G	0.7531	0.0077	0.0019	5.7e-05	791569
rs1439620	15:93429646	2	CHD2	A/G	0.319	0.0071	0.0018	5.8e-05	789595
rs2123010	5:36921325	1	NIPBL	T/C	0.8738	0.0105	0.0026	7.1e-05	691443
rs328300	8:38344499	0	FGFR1	T/G	0.5157	0.0069	0.0017	7.5e-05	680608
rs12233949	5:42607461	0	GHR	C/G	0.2946	0.0072	0.0018	7.8e-05	783117
rs4140424	20:5341923	13	PROKR2	T/C	0.4454	-0.0068	0.0017	8.3e-05	692370
rs9810934	3:45954352	10	LZTFL1	A/G	0.2454	-0.0078	0.002	9e-05	692542
rs7153778	14:89252165	0	TTC8	C/G	0.2494	0.0078	0.002	9.9e-05	687787
rs1860601	7:33484507	0	BBS9	T/G	0.7423	0.0077	0.002	0.0001	688358
rs11654081	17:17708129	7	RAI1	T/C	0.3651	-0.0071	0.0018	0.0001	685547
rs7012413	8:38317398	0	FGFR1	T/C	0.3045	0.0073	0.0019	0.00011	692573
rs9899634	17:17727943	19	RAI1	A/T	0.6335	0.007	0.0018	0.00011	685631
rs8031691	15:73064927	6	BBS4	A/G	0.8902	0.0107	0.0028	0.00012	691080
rs241816	6:100879651	1	SIM1	T/C	0.6525	0.007	0.0018	0.00012	691277
rs262534	2:63906375	0	WDPCP	A/T	0.3354	0.007	0.0018	0.00012	691231
rs12057045	9:87450224	2	NTRK2	A/T	0.7692	-0.0079	0.0021	0.00013	675550
rs6026543	20:57394025	6	GNAS	A/G	0.03017	0.0188	0.005	0.00015	690721
rs1121276	1:243710407	0	SDCCAG8	T/C	0.6553	-0.0066	0.0017	0.00015	775776
rs881300	8:38332298	3	FGFR1	A/C	0.8639	0.009	0.0024	0.00017	785665
rs13027594	2:63362468	0	WDPCP	A/G	0.362	-0.0068	0.0018	0.00018	683256
rs12926323	16:56582548	0	BBS2	T/C	0.6069	0.0067	0.0018	0.00019	688412
rs12951376	17:17752809	0	RAI1	T/C	0.3127	-0.0067	0.0018	0.0002	791564
rs1260333	2:27748624	3	IFT172	A/G	0.4478	-0.0064	0.0017	0.00022	691566
rs12127169	1:243615023	3	SDCCAG8	T/C	0.1087	-0.0103	0.0028	0.00022	683902
rs10867041	9:140551809	0	EHMT1	T/C	0.1446	-0.0096	0.0026	0.00024	561206
rs11125947	2:63334101	0	WDPCP	T/C	0.3196	-0.0069	0.0019	0.00024	684141
rs1590142	7:33122183	0	BBS9	T/C	0.2816	-0.007	0.0019	0.00027	677873
rs12447449	16:3880659	0	CREBBP	A/G	0.96825	-0.0162	0.0045	0.00027	589160
rs976529	1:243471462	0	SDCCAG8	T/C	0.03309	-0.0177	0.0049	0.00028	678582
rs10152428	15:93510243	8	CHD2	C/G	0.7253	-0.007	0.002	0.00033	688875
rs10114941	9:87443528	2	NTRK2	C/G	0.04063	0.0161	0.0045	0.00033	677566
rs1040461	6:57055354	11	RAB23	T/C	0.0863	-0.0113	0.0032	0.00034	692606
rs3744115	17:17749822	18	RAI1	A/G	0.6349	0.0064	0.0018	0.00034	692567
rs292179	5:36947613	21	NIPBL	A/G	0.8303	0.0083	0.0023	0.00037	691995
rs11140783	9:87454817	3	NTRK2	T/C	0.08483	0.0112	0.0031	0.00037	692606
rs293774	5:36943268	19	NIPBL	A/G	0.1611	-0.0084	0.0024	0.00039	692296
rs4917576	10:112299896	0	SMC3	A/T	0.1027	-0.0102	0.0029	0.0004	670536
rs158793	5:36885090	20	NIPBL	A/G	0.158	-0.0084	0.0024	0.00042	691885
rs12338909	9:87581059	0	NTRK2	T/G	0.08197	-0.0114	0.0032	0.00044	682887
rs10803143	1:243615589	0	SDCCAG8	T/C	0.2629	-0.0069	0.002	0.00044	682829
rs17114996	15:25245502	17	SNURF	A/G	0.02081	0.0211	0.006	0.00044	688745
rs10868229	9:87463562	1	NTRK2	A/G	0.501	0.006	0.0017	0.00048	736391
rs2490400	1:243492643	0	SDCCAG8	T/C	0.7629	0.0072	0.0021	0.00051	646058
rs5995341	22:37161320	0	IFT27	T/C	0.06478	-0.0121	0.0035	0.00056	683460
rs972721	2:63361502	2	WDPCP	T/C	0.2479	-0.0065	0.0019	0.0006	788660
rs2531757	3:45850520	0	LZTFL1	A/C	0.3451	0.0063	0.0019	0.00061	662528
rs11130079	3:45978473	0	LZTFL1	A/G	0.07302	-0.0117	0.0034	0.00067	666626
rs850813	15:23895635	0	MAGEL2	A/G	0.4463	0.0062	0.0018	0.00068	637647
rs7271854	20:57447022	0	GNAS	T/C	0.3989	0.0061	0.0018	0.00072	666506
rs12449964	17:17544704	3	RAI1	T/C	0.4464	0.0055	0.0016	0.00075	792570
rs1936433	9:87255047	2	NTRK2	T/C	0.1366	-0.0084	0.0025	0.0008	691655
rs1875227	16:56598615	0	BBS2	T/C	0.06835	0.011	0.0033	0.00082	780241
rs234632	20:57482070	0	GNAS	T/G	0.9651	0.0168	0.005	0.00082	661787
rs11140720	9:87272824	3	NTRK2	A/C	0.91382	0.0103	0.0031	0.00082	692490
rs11140707	9:87250190	1	NTRK2	A/G	0.3047	-0.0063	0.0019	0.00083	692230
rs2074800	16:3725682	0	CREBBP	A/G	0.04946	0.014	0.0042	0.00085	677338
rs12424648	12:76725000	0	BBS10	A/G	0.0442	0.012	0.0036	0.00086	766646
rs8054755	16:3741122	0	CREBBP	T/C	0.03853	0.0158	0.0047	0.00087	666109
rs10119181	9:87475368	7	NTRK2	T/G	0.8637	-0.0079	0.0024	0.00094	790562
rs7580520	2:63909178	0	WDPCP	T/C	0.6946	-0.0063	0.0019	0.00095	675433
rs738518	22:37119800	0	IFT27	T/C	0.7349	0.0066	0.002	0.00096	682346
rs12936587	17:17543722	2	RAI1	A/G	0.4536	0.0054	0.0016	0.00097	794884
rs10254276	7:33297773	12	BBS9	T/C	0.94697	-0.0126	0.0038	0.001	689449
rs9875616	3:45979877	1	LZTFL1	A/G	0.7133	0.0061	0.0019	0.0011	691593
rs7560499	2:63983802	0	WDPCP	T/C	0.8635	-0.0083	0.0025	0.0011	686038
rs2531742	3:45841068	1	LZTFL1	A/G	0.4096	0.0057	0.0018	0.0012	692550
rs6085092	20:5300006	1	PROKR2	T/C	0.5699	0.0057	0.0018	0.0012	681338
rs6546028	2:64060658	0	WDPCP	C/G	0.95627	-0.0131	0.004	0.0012	675196
rs13396747	2:170397635	4	BBS5	A/C	0.03315	-0.0146	0.0045	0.0013	786720
rs6139697	20:5326578	4	PROKR2	T/C	0.2201	0.0069	0.0021	0.0013	690264
rs2145710	14:89392752	0	TTC8	A/G	0.7021	-0.0061	0.0019	0.0013	678000
rs1517408	2:63490493	8	WDPCP	A/G	0.4914	0.0052	0.0016	0.0013	793291
rs3843532	7:33154447	0	BBS9	T/C	0.2442	-0.0066	0.0021	0.0014	668551
rs130038	16:3857035	0	CREBBP	T/G	0.94124	0.0131	0.0041	0.0014	618054
rs17124947	14:89361488	13	TTC8	A/C	0.1201	0.0084	0.0026	0.0014	692519
rs17395534	7:33234331	1	BBS9	A/G	0.94826	-0.0116	0.0036	0.0015	777987
rs4554233	5:42619316	6	GHR	A/G	0.8072	0.007	0.0022	0.0015	692381
rs1662695	9:87405212	1	NTRK2	A/G	0.8699	0.0079	0.0025	0.0015	773832
rs1109027	2:63815206	9	WDPCP	A/G	0.7758	0.0065	0.002	0.0015	691974
rs13337155	16:56504724	4	BBS2	C/G	0.2483	-0.0063	0.002	0.0016	692374
rs7170052	15:93457650	1	CHD2	T/C	0.7515	0.0064	0.002	0.0016	674631
rs10737887	1:243424146	7	SDCCAG8	T/C	0.1292	-0.0083	0.0026	0.0016	692514
rs10007956	4:122700669	1	BBS7	A/T	0.4347	-0.0054	0.0017	0.0017	687385
rs1891628	9:140477812	7	EHMT1	A/G	0.1975	0.0066	0.0021	0.0017	774508
rs10210482	2:64058713	0	WDPCP	T/C	0.95615	-0.0137	0.0044	0.0017	671474
rs16959558	16:56576069	0	BBS2	T/C	0.8403	-0.0072	0.0023	0.0018	767835
rs17618045	2:63793255	10	WDPCP	T/C	0.7762	0.0064	0.002	0.0018	691288
rs6462473	7:33418376	0	BBS9	A/C	0.2211	-0.0065	0.0021	0.0019	688929
rs10098852	8:100921303	1	VPS13B	A/G	0.638	0.0057	0.0018	0.0019	692470
rs1850983	2:63448724	0	WDPCP	C/G	0.97539	0.017	0.0055	0.0019	689359
rs11140745	9:87355358	28	NTRK2	T/C	0.341	-0.0057	0.0018	0.002	687720
rs3759870	15:73019968	9	BBS4	A/G	0.90792	0.0091	0.003	0.0022	692240
rs12446940	16:3962620	0	CREBBP	A/G	0.3614	-0.0057	0.0019	0.0022	638663
rs6996321	8:38322346	3	FGFR1	A/G	0.3849	-0.005	0.0017	0.0024	795544
rs9357941	6:57074911	1	RAB23	A/G	0.05022	-0.0127	0.0042	0.0024	688308
rs11600009	11:66253475	0	BBS1	T/C	0.03502	-0.0147	0.0049	0.0025	671780
rs4076212	4:122799461	0	BBS7	A/T	0.8709	0.0081	0.0027	0.0025	652149
rs6123836	20:57448746	1	GNAS	T/C	0.3563	0.0053	0.0018	0.0026	762299
rs4815797	20:5338636	4	PROKR2	T/C	0.7562	0.006	0.002	0.0026	690774
rs3825065	11:66311011	30	BBS1	A/G	0.7469	0.0057	0.0019	0.0027	788492
rs2143694	22:41584351	13	EP300	A/G	0.3376	0.0055	0.0018	0.0027	692640
rs12173390	6:57089708	0	RAB23	A/T	0.04373	-0.0141	0.0047	0.0027	682331
rs12236506	9:119415142	6	TRIM32	C/G	0.91558	0.009	0.003	0.0027	692302
rs6468697	8:100870382	0	VPS13B	A/G	0.7882	-0.006	0.002	0.0027	765573
rs13431584	2:63514651	0	WDPCP	A/G	0.474	0.0052	0.0017	0.0027	690011
rs2109526	7:33511742	2	BBS9	T/G	0.1748	0.0069	0.0023	0.0028	678907
rs10780690	9:87478172	2	NTRK2	T/G	0.5182	0.0052	0.0017	0.0029	684904
rs6730863	2:63939417	5	WDPCP	T/C	0.7509	-0.0059	0.002	0.0029	692489
rs9998785	4:122728965	14	BBS7	A/T	0.614	0.0052	0.0018	0.003	692446
rs7852475	9:140698856	0	EHMT1	T/C	0.6222	-0.0055	0.0018	0.003	666526
rs10817917	9:119406202	5	TRIM32	T/C	0.06969	-0.0098	0.0033	0.003	692078
rs1829524	2:63407893	5	WDPCP	T/C	0.2032	0.0064	0.0022	0.003	690300
rs906496	4:122833314	18	BBS7	T/C	0.3312	-0.0054	0.0018	0.0031	692534
rs17087959	9:87575920	0	NTRK2	T/C	0.8266	0.007	0.0024	0.0031	677872
rs850817	15:23893689	4	MAGEL2	A/G	0.5911	0.0053	0.0018	0.0033	683498
rs17778117	20:5330878	5	PROKR2	T/C	0.7717	0.006	0.0021	0.0033	686410
rs1800900	20:57415110	2	GNAS	A/G	0.3593	-0.005	0.0017	0.0034	792624
rs1024626	3:45902844	0	LZTFL1	A/G	0.93224	0.0115	0.0039	0.0034	675743
rs10949013	6:57129687	4	RAB23	A/G	0.1136	-0.0081	0.0028	0.0035	692265
rs6735699	2:63794888	0	WDPCP	T/G	0.0159	-0.0174	0.006	0.0035	655577
rs5756339	22:37166457	8	IFT27	T/C	0.7972	0.0063	0.0022	0.0036	692492
rs999540	22:37121101	0	IFT27	A/G	0.1897	-0.0066	0.0023	0.0036	683785
rs6576608	15:23909626	0	MAGEL2	A/G	0.4521	-0.0052	0.0018	0.0037	670177
rs12079656	1:243453119	33	SDCCAG8	T/G	0.3292	0.0053	0.0018	0.0037	692542
rs7273251	20:57450415	0	GNAS	T/C	0.02958	0.016	0.0055	0.0039	540501
rs11030134	11:27786474	5	BDNF	T/C	0.6249	-0.0051	0.0018	0.0041	679716
rs11137140	9:140488857	0	EHMT1	C/G	0.654	0.0054	0.0019	0.0041	670182
rs12005792	9:87236739	0	NTRK2	T/C	0.7761	0.0061	0.0021	0.0041	678416
rs1596360	9:87579148	2	NTRK2	A/G	0.2692	-0.0057	0.002	0.0041	683456
rs6116721	20:5255078	1	PROKR2	T/G	0.6162	0.0051	0.0018	0.0042	692368
rs4877894	9:87590382	5	NTRK2	A/G	0.571	0.0049	0.0017	0.0043	692056
rs240768	6:100957344	0	SIM1	T/C	0.95089	0.0108	0.0038	0.0044	795033
rs7583698	2:27712408	1	IFT172	T/C	0.05443	0.0104	0.0036	0.0045	781112
rs10867067	9:140680532	11	EHMT1	A/G	0.6292	-0.0051	0.0018	0.0046	689780
rs2683451	2:170384532	3	BBS5	A/G	0.5545	-0.0046	0.0016	0.0047	793529
rs7802391	7:33560825	0	BBS9	T/G	0.02496	0.0152	0.0054	0.0047	664795
rs13194787	6:84722195	0	MRAP2	A/C	0.09559	-0.0076	0.0027	0.0048	626910
rs2994329	1:243647921	4	SDCCAG8	T/C	0.1961	-0.006	0.0021	0.0048	692587
rs3798508	6:100853964	0	SIM1	T/C	0.2065	0.0058	0.0021	0.0048	736120
rs2145095	20:5317586	4	PROKR2	A/G	0.3913	0.005	0.0018	0.005	684189
rs6983315	8:38299419	2	FGFR1	A/G	0.4294	-0.0049	0.0018	0.0051	691811
rs4866792	5:42651224	20	GHR	T/C	0.8338	0.0065	0.0023	0.0052	692538
rs13188386	5:42473555	4	GHR	A/G	0.2665	-0.0054	0.0019	0.0053	692497
rs7129	3:45959759	15	LZTFL1	T/C	0.5908	-0.0049	0.0017	0.0053	692607
rs6116751	20:5325472	1	PROKR2	T/C	0.526	0.0048	0.0017	0.0054	684957
rs129968	16:3791261	1	CREBBP	A/G	0.3499	0.0051	0.0018	0.0055	691938
rs7396690	11:8115762	0	TUB	C/G	0.04408	0.0104	0.0038	0.0059	614097
rs1387926	9:87632663	3	NTRK2	T/C	0.1414	-0.0068	0.0025	0.006	690985
rs8125112	20:57431165	0	GNAS	T/C	0.842	-0.0064	0.0024	0.0063	688347
rs3774642	3:45937782	1	LZTFL1	C/G	0.93312	-0.0091	0.0033	0.0063	691907
rs3123510	9:140636333	0	EHMT1	A/G	0.4174	0.0048	0.0018	0.0065	685652
rs2064061	3:45871203	1	LZTFL1	A/G	0.5174	-0.0047	0.0017	0.0066	692542
rs17285449	16:56596155	3	BBS2	T/G	0.08986	0.0084	0.0031	0.0067	680800
rs1507995	4:122748308	18	BBS7	A/G	0.3178	0.0048	0.0018	0.0067	795043
rs11503324	12:88415845	0	CEP290	T/C	0.01345	0.0244	0.009	0.0067	509760
rs2272461	15:93522312	0	CHD2	A/G	0.6747	-0.0051	0.0019	0.0067	675034
rs715541	22:37116098	1	IFT27	A/G	0.6438	0.0049	0.0018	0.0068	689940
rs12602348	17:17547236	6	RAI1	A/G	0.4146	0.0047	0.0017	0.0068	691958
rs1566441	16:56597636	0	BBS2	T/G	0.5285	-0.0047	0.0018	0.0069	677693
rs6092708	20:57517574	2	GNAS	T/C	0.1835	0.0061	0.0023	0.0071	686291
rs9610875	22:38323507	0	SOX10	T/G	0.2354	0.0055	0.002	0.0071	691709
rs12426026	12:76761610	0	BBS10	T/C	0.08922	0.0082	0.0031	0.0072	673394
rs11140719	9:87271229	1	NTRK2	T/C	0.95112	0.0107	0.004	0.0072	692311
rs11140810	9:87574808	0	NTRK2	T/G	0.4633	-0.0047	0.0018	0.0072	690160
rs8920	15:23888891	2	MAGEL2	A/T	0.4443	-0.0048	0.0018	0.0073	688833
rs3746684	20:5283376	8	PROKR2	A/G	0.3816	-0.0047	0.0018	0.0073	692351
rs17418241	9:87625848	0	NTRK2	T/C	0.09606	-0.0079	0.0029	0.0074	690338
rs7159503	14:89388881	1	TTC8	A/G	0.4329	-0.0045	0.0017	0.0074	781007
rs17753687	15:72980550	0	BBS4	T/C	0.07507	-0.0086	0.0032	0.0076	688215
rs17005251	4:122750340	0	BBS7	T/C	0.97732	-0.0144	0.0054	0.0076	661566
rs2141322	11:8067451	1	TUB	A/G	0.7785	0.0057	0.0021	0.0076	687717
rs11140708	9:87255402	5	NTRK2	C/G	0.1721	-0.0061	0.0023	0.0078	692515
rs11604511	11:8055436	1	TUB	T/C	0.7389	0.005	0.0019	0.0079	790523
rs12513643	5:42378916	5	GHR	A/C	0.8162	0.0058	0.0022	0.0081	691544
rs282237	16:56588470	0	BBS2	A/T	0.5139	-0.0047	0.0018	0.0084	654234
rs7939737	11:8113594	0	TUB	A/G	0.04671	-0.0106	0.004	0.0084	665468
rs3826036	15:93467391	16	CHD2	T/C	0.4658	-0.0045	0.0017	0.0085	692566
rs6026560	20:57426528	0	GNAS	T/C	0.8007	0.0059	0.0023	0.0085	635464
rs309406	4:123618707	13	BBS12	A/G	0.5707	0.0045	0.0017	0.0086	692573
rs1051881	4:122737965	3	BBS7	C/G	0.01754	0.0154	0.0059	0.0087	771371
rs8035159	15:93407288	0	CHD2	A/G	0.7041	-0.0047	0.0018	0.0088	774098
rs2028884	2:63812148	0	WDPCP	A/G	0.8833	-0.0067	0.0026	0.0088	680142
rs10885068	10:112713815	6	BBIP1	A/G	0.6887	0.0048	0.0019	0.0089	690689
rs6026544	20:57394420	3	GNAS	T/C	0.5357	0.0045	0.0017	0.009	692549
rs2275998	11:66326581	1	BBS1	T/C	0.817	0.0058	0.0022	0.0093	692327
rs2445013	8:38373822	2	FGFR1	C/G	0.05999	-0.0097	0.0037	0.0093	691730
rs1317500	11:8111121	0	TUB	T/C	0.07396	0.0089	0.0034	0.0093	663815
rs6015411	20:57522434	5	GNAS	T/G	0.2135	0.0056	0.0021	0.0094	687109
rs17241549	6:100864280	0	SIM1	C/G	0.94545	0.0089	0.0034	0.0095	639057
rs9905728	17:17564523	0	RAI1	T/C	0.4621	-0.0045	0.0017	0.0096	683172
rs869966	10:112378718	1	SMC3	T/C	0.90283	-0.0079	0.0031	0.0099	677598
rs2022230	7:33119907	0	BBS9	A/G	0.7062	-0.005	0.0019	0.01	678781
rs1441397	8:96267756	2	C8orf37	T/C	0.0328	-0.0128	0.005	0.01	680711
rs8042437	15:93547575	0	CHD2	T/C	0.3345	0.0047	0.0018	0.01	689017
rs17136507	16:3800545	0	CREBBP	T/C	0.91359	-0.0084	0.0033	0.01	662576
rs2206660	20:10349971	0	MKKS	A/G	0.96404	0.0115	0.0045	0.01	689829
rs7747189	6:100857869	11	SIM1	A/G	0.2691	0.0049	0.0019	0.01	692590
rs17786463	7:33432951	6	BBS9	A/T	0.8443	0.0061	0.0024	0.011	691748
rs2109525	7:33411267	4	BBS9	T/G	0.8402	0.006	0.0024	0.011	692222
rs2273085	22:41615376	20	EP300	T/C	0.2829	0.0049	0.0019	0.011	692647
rs10803138	1:243555219	3	SDCCAG8	A/G	0.2558	0.0051	0.002	0.011	683832
rs12991228	2:63485625	4	WDPCP	C/G	0.1718	-0.0058	0.0023	0.011	690161
rs2034802	2:63968655	0	WDPCP	A/G	0.04134	0.0108	0.0042	0.011	677130
rs4544421	2:64097868	8	WDPCP	T/C	0.7622	0.0051	0.002	0.011	689785
rs1012075	16:56583516	0	BBS2	T/G	0.7033	-0.0048	0.0019	0.012	692511
rs2592787	2:170424381	2	BBS5	T/C	0.7304	-0.0049	0.0019	0.012	691478
rs12903587	15:93455471	3	CHD2	A/G	0.3742	-0.0043	0.0017	0.012	772114
rs9475804	6:57127760	4	RAB23	A/G	0.04069	-0.0113	0.0045	0.012	692254
rs9890064	17:17538008	1	RAI1	A/C	0.5419	0.0044	0.0017	0.012	682677
rs4784669	16:56481282	0	BBS2	A/G	0.4093	-0.0043	0.0018	0.013	690845
rs9929724	16:56535613	13	BBS2	A/C	0.3923	-0.0044	0.0018	0.013	692288
rs2392245	7:33567912	0	BBS9	T/C	0.3375	0.0045	0.0018	0.013	687135
rs7703713	5:42555931	16	GHR	A/G	0.2698	-0.0048	0.0019	0.013	692606
rs5750285	22:37104248	0	IFT27	C/G	0.5937	0.0044	0.0018	0.013	692106
rs699329	15:23929120	0	MAGEL2	A/T	0.3267	0.005	0.002	0.013	580926
rs2145089	20:5283634	17	PROKR2	A/G	0.4965	0.0043	0.0017	0.013	692283
rs6703335	1:243608967	5	SDCCAG8	A/G	0.4338	-0.0043	0.0017	0.013	691916
rs1876155	6:100797890	0	SIM1	T/G	0.1528	0.0057	0.0023	0.013	778351
rs2554426	15:25219195	4	SNURF	T/G	0.08735	0.0076	0.0031	0.013	691737
rs12996320	2:63310229	0	WDPCP	A/G	0.8792	0.0067	0.0027	0.013	682313
rs1557852	5:132181800	5	AFF4	A/G	0.3179	-0.0045	0.0018	0.014	692414
rs921301	4:123705387	9	BBS12	T/C	0.03151	0.0132	0.0054	0.014	676756
rs10852181	15:93412778	0	CHD2	C/G	0.1444	0.0062	0.0025	0.014	682973
rs7170644	15:93559178	0	CHD2	A/G	0.3118	0.0047	0.0019	0.014	687187
rs6064709	20:57379850	2	GNAS	A/G	0.4977	0.0043	0.0017	0.014	681832
rs2267362	22:37216482	1	IFT27	C/G	0.7488	0.0048	0.0019	0.014	765892
rs7644870	3:45830886	2	LZTFL1	A/C	0.7423	0.0048	0.0019	0.014	691651
rs6107614	20:5308321	1	PROKR2	A/G	0.5803	0.0041	0.0017	0.014	777032
rs9693641	8:100566950	2	VPS13B	T/C	0.05227	-0.0095	0.0039	0.014	675562
rs215970	6:84714136	0	MRAP2	A/C	0.9772	-0.0154	0.0063	0.015	611461
rs396542	5:36828730	1	NIPBL	A/G	0.7248	0.0048	0.0019	0.015	692548
rs12348710	9:87554605	6	NTRK2	T/C	0.8649	0.0061	0.0025	0.015	691130
rs1490402	9:87673253	14	NTRK2	T/C	0.8436	0.0059	0.0024	0.015	691948
rs7048015	9:87478135	0	NTRK2	A/C	0.8091	-0.0053	0.0022	0.015	688178
rs2421547	2:73641088	4	ALMS1	T/G	0.06297	0.0081	0.0034	0.016	792479
rs2304655	15:93435225	1	CHD2	T/C	0.5645	-0.0042	0.0018	0.016	679823
rs6559225	9:140687468	31	EHMT1	A/G	0.6919	-0.0045	0.0019	0.016	692329
rs11168828	12:49422795	0	KMT2D	A/G	0.08378	-0.0087	0.0036	0.016	594668
rs11140803	9:87512669	0	NTRK2	A/G	0.1748	0.0059	0.0025	0.016	675407
rs1803183	4:122735142	6	BBS7	A/G	0.98293	-0.0143	0.006	0.017	766505
rs1187287	9:87414794	4	NTRK2	A/G	0.2012	-0.0051	0.0021	0.017	692435
rs6546008	2:63733387	1	WDPCP	A/G	0.0397	0.0103	0.0044	0.017	670372
rs8023358	15:73052845	6	BBS4	A/G	0.8454	0.0058	0.0024	0.018	692336
rs4723274	7:33235084	0	BBS9	T/C	0.3446	0.0043	0.0018	0.018	689085
rs1045777	9:140512555	8	EHMT1	A/G	0.1939	0.0053	0.0022	0.018	687285
rs9548	9:139317823	2	INPP5E	T/C	0.176	0.0053	0.0022	0.018	692071
rs3780634	9:87488718	9	NTRK2	A/G	0.8397	-0.0055	0.0023	0.018	692169
rs6786206	3:71882642	0	PROK2	T/C	0.1458	0.006	0.0025	0.018	676272
rs11195165	10:112281955	0	SMC3	A/T	0.95884	0.0107	0.0045	0.018	650163
rs11819139	10:112331272	3	SMC3	A/G	0.04636	-0.0093	0.0039	0.018	725819
rs17700521	14:89315875	2	TTC8	C/G	0.7298	0.0046	0.002	0.018	690714
rs4318375	2:64044827	0	WDPCP	T/C	0.5256	0.0041	0.0017	0.018	687472
rs7082572	10:112699394	9	BBIP1	A/G	0.2354	-0.0047	0.002	0.019	691811
rs2071005	16:56598904	1	BBS2	A/G	0.5372	-0.0041	0.0017	0.019	687608
rs762604	16:56602671	0	BBS2	T/C	0.3063	-0.0044	0.0019	0.019	676249
rs2460867	2:170409326	6	BBS5	T/C	0.6078	-0.0041	0.0018	0.019	692094
rs17525249	15:93472980	4	CHD2	T/C	0.91546	0.0074	0.0031	0.019	690910
rs6559222	9:140684139	32	EHMT1	T/C	0.6919	-0.0044	0.0019	0.019	692292
rs17574650	5:42436916	0	GHR	A/C	0.8946	-0.0068	0.0029	0.019	673767
rs2531747	3:45828586	1	LZTFL1	T/C	0.4539	0.0039	0.0017	0.019	780612
rs16991547	20:10394046	32	MKKS	A/G	0.1118	-0.0064	0.0027	0.019	692380
rs6469661	8:117841045	2	RAD21	T/C	0.4711	-0.0041	0.0017	0.019	680397
rs6462459	7:33124005	3	BBS9	T/C	0.2124	0.0051	0.0022	0.02	686846
rs6108565	20:10398974	31	MKKS	T/C	0.1093	-0.0064	0.0027	0.02	692606
rs1187333	9:87266352	12	NTRK2	A/G	0.1416	-0.0057	0.0025	0.02	692392
rs3860945	9:87585624	2	NTRK2	A/G	0.8435	0.0056	0.0024	0.02	692207
rs2421860	2:63375950	0	WDPCP	T/C	0.7575	-0.0047	0.002	0.02	686265
rs10038027	5:132230745	1	AFF4	A/T	0.6366	0.0039	0.0017	0.021	787780
rs7895872	10:112678657	12	BBIP1	T/G	0.7442	0.0046	0.002	0.021	690456
rs964034	15:93563661	0	CHD2	C/G	0.8756	0.0063	0.0027	0.021	660997
rs4876902	9:140710603	0	EHMT1	T/C	0.2216	0.0048	0.0021	0.021	685822
rs7816	9:87430521	7	NTRK2	A/T	0.7525	0.0047	0.002	0.021	689313
rs10803142	1:243598234	4	SDCCAG8	A/G	0.5288	0.004	0.0017	0.021	687079
rs10839957	11:8003309	0	TUB	A/G	0.2902	-0.0045	0.0019	0.021	673539
rs2242663	11:66335308	0	BBS1	T/C	0.7622	0.0046	0.002	0.022	692229
rs10249379	7:33492280	0	BBS9	T/G	0.98433	0.0154	0.0067	0.022	650235
rs4442031	7:33355239	1	BBS9	A/G	0.93259	-0.0076	0.0033	0.022	787303
rs7798118	7:33311464	34	BBS9	A/G	0.91335	0.007	0.0031	0.022	692577
rs12907473	15:93454250	5	CHD2	A/G	0.4156	-0.0041	0.0018	0.022	671400
rs130023	16:3833306	0	CREBBP	A/G	0.9727	-0.0108	0.0047	0.022	620779
rs1883988	22:37105180	6	IFT27	A/G	0.2689	-0.0045	0.002	0.022	691437
rs850818	15:23893311	0	MAGEL2	A/G	0.4835	-0.0042	0.0018	0.022	623351
rs158411	5:36856801	2	NIPBL	T/C	0.7208	0.0045	0.0019	0.022	690587
rs7824338	8:117850062	2	RAD21	A/G	0.532	-0.004	0.0017	0.022	692083
rs13006124	2:63961179	7	WDPCP	A/C	0.5741	0.004	0.0017	0.022	690517
rs2421917	2:63449512	8	WDPCP	T/C	0.90844	0.007	0.003	0.022	692570
rs114502	16:56583055	1	BBS2	T/C	0.3423	0.0042	0.0019	0.023	689913
rs8037021	15:93401742	0	CHD2	C/G	0.8989	-0.0067	0.0029	0.023	679252
rs10732688	9:140581700	0	EHMT1	T/G	0.6933	0.0043	0.0019	0.023	685547
rs8178289	17:56319930	0	MKS1	A/C	0.8482	-0.0052	0.0023	0.023	778657
rs1187286	9:87415028	2	NTRK2	T/G	0.7613	0.0046	0.002	0.023	691803
rs4758040	11:8101173	0	TUB	T/C	0.5384	-0.0039	0.0017	0.023	692532
rs7656081	4:123698119	1	BBS12	A/G	0.01912	0.0146	0.0064	0.024	668057
rs2149561	9:140469600	0	EHMT1	T/C	0.04467	0.0103	0.0046	0.024	576605
rs4345038	3:71879803	0	PROK2	A/G	0.1245	0.006	0.0027	0.024	686902
rs9940638	16:56578562	0	BBS2	A/G	0.1555	0.0055	0.0025	0.025	668339
rs3769771	2:170368438	0	BBS5	T/C	0.1297	-0.0054	0.0024	0.025	795528
rs1362368	7:33197232	1	BBS9	A/C	0.4223	0.0039	0.0017	0.025	692495
rs4876948	9:140694331	0	EHMT1	T/C	0.1244	0.006	0.0027	0.025	683537
rs2476900	6:84849717	0	MRAP2	A/G	0.1998	-0.0047	0.0021	0.025	783335
rs1524842	15:23954249	1	NDN	A/G	0.4656	-0.0039	0.0018	0.025	663006
rs6139702	20:5343385	0	PROKR2	T/C	0.833	-0.0053	0.0024	0.025	684124
rs11694709	2:64022996	0	WDPCP	A/G	0.2748	0.0043	0.0019	0.025	686664
rs11739417	5:132228133	13	AFF4	A/G	0.7982	0.0048	0.0021	0.026	692509
rs961679	7:33458535	36	BBS9	A/G	0.7915	-0.0047	0.0021	0.026	692325
rs12294984	11:27793532	1	BDNF	A/T	0.6507	-0.0041	0.0018	0.026	683773
rs2269512	22:37210677	1	IFT27	T/C	0.2354	-0.0046	0.0021	0.026	673221
rs1058961	3:45865006	0	LZTFL1	T/C	0.35	-0.004	0.0018	0.026	689942
rs1374912	3:71811875	1	PROK2	A/G	0.6835	0.0042	0.0019	0.026	684913
rs4813740	20:5299893	3	PROKR2	A/G	0.3319	0.0042	0.0019	0.026	680957
rs6085132	20:5344064	10	PROKR2	T/C	0.95785	-0.0094	0.0042	0.026	690073
rs17774608	14:89372968	4	TTC8	A/G	0.4474	0.0039	0.0017	0.026	691062
rs12667900	7:33131729	0	BBS9	A/G	0.234	0.0046	0.0021	0.027	685539
rs8026695	15:93467354	3	CHD2	T/G	0.5425	-0.0038	0.0017	0.027	691606
rs7517340	1:243710190	0	SDCCAG8	T/C	0.1766	0.005	0.0022	0.027	687298
rs7831963	8:100865242	16	VPS13B	A/G	0.8257	-0.005	0.0023	0.027	692598
rs2392229	7:33173539	28	BBS9	A/G	0.91365	0.0067	0.0031	0.028	692107
rs2277192	9:87573977	0	NTRK2	A/G	0.8541	0.0055	0.0025	0.028	667958
rs12153009	5:42553879	0	GHR	A/G	0.2993	0.0041	0.0019	0.029	692566
rs7832488	8:100865413	17	VPS13B	A/G	0.174	0.005	0.0023	0.029	692372
rs4521728	8:96329180	1	C8orf37	A/C	0.8329	-0.005	0.0023	0.03	679408
rs7858355	9:140680789	32	EHMT1	T/C	0.283	0.0042	0.0019	0.03	691259
rs6883523	5:42564748	0	GHR	T/G	0.1923	-0.0048	0.0022	0.03	689696
rs1316853	3:71837036	0	PROK2	T/C	0.03157	-0.0109	0.005	0.03	654114
rs13279543	8:117809105	0	RAD21	A/G	0.8755	-0.0061	0.0028	0.03	666855
rs6474354	8:38302965	1	FGFR1	T/C	0.2053	-0.0047	0.0022	0.031	680850
rs7495396	15:23785447	0	MKRN3	A/G	0.07039	0.0072	0.0033	0.031	520704
rs803939	9:119453455	20	TRIM32	T/C	0.5292	-0.0035	0.0016	0.031	794124
rs2896092	14:89379801	4	TTC8	A/G	0.1712	0.0049	0.0023	0.031	691604
rs6585021	10:112650055	1	BBIP1	T/C	0.1035	-0.0059	0.0027	0.032	794843
rs13171720	5:42442715	8	GHR	T/C	0.2024	-0.0045	0.0021	0.032	692246
rs6107606	20:5247910	0	PROKR2	A/C	0.7973	0.0046	0.0021	0.032	684367
rs2368514	12:76692757	3	BBS10	A/G	0.6135	0.0038	0.0018	0.033	681188
rs17170217	7:33441870	38	BBS9	T/C	0.91394	0.0066	0.0031	0.033	691773
rs555269	6:84726156	12	MRAP2	T/C	0.2582	-0.0042	0.002	0.033	691736
rs6502615	17:17612023	3	RAI1	T/C	0.4282	0.0035	0.0016	0.033	793773
rs10491279	5:132198100	4	AFF4	T/C	0.1731	-0.0048	0.0023	0.034	692088
rs17166294	5:132201897	5	AFF4	T/C	0.8339	0.0049	0.0023	0.034	690194
rs11076783	16:3782705	0	CREBBP	T/C	0.06192	0.0078	0.0037	0.034	664593
rs10706	9:139301414	3	INPP5E	C/G	0.179	0.0047	0.0022	0.034	690980
rs4758293	11:8129433	0	TUB	C/G	0.04695	-0.009	0.0043	0.034	582629
rs4683143	3:45855172	1	LZTFL1	T/C	0.3718	-0.0036	0.0017	0.035	774253
rs1928283	6:84807168	2	MRAP2	A/G	0.98679	0.0138	0.0065	0.035	667729
rs12378021	9:87635540	1	NTRK2	T/C	0.1751	-0.0046	0.0022	0.035	793215
rs16888435	6:57127622	1	RAB23	T/C	0.9437	0.0081	0.0039	0.035	692109
rs11785240	8:100621749	1	VPS13B	A/C	0.97661	0.0113	0.0054	0.035	660888
rs17309944	11:27764496	0	BDNF	T/C	0.08179	0.0064	0.003	0.036	654822
rs4480754	15:23886941	0	MAGEL2	T/G	0.7323	-0.004	0.0019	0.036	753581
rs7757492	6:57120578	3	RAB23	T/C	0.6922	-0.0039	0.0019	0.036	689882
rs7113729	11:8089121	4	TUB	T/C	0.5637	-0.0037	0.0017	0.036	687262
rs1029852	7:33409323	40	BBS9	T/C	0.91528	0.0065	0.0031	0.037	691963
rs11766521	7:33196637	69	BBS9	T/C	0.8185	-0.0046	0.0022	0.037	692478
rs4758281	11:8091548	4	TUB	A/C	0.3805	0.0037	0.0018	0.037	687237
rs13238052	7:33133384	0	BBS9	A/G	0.1075	-0.0057	0.0027	0.038	676071
rs17169913	7:33195816	70	BBS9	T/C	0.8191	-0.0045	0.0022	0.038	692457
rs5750310	22:37208660	0	IFT27	A/C	0.5205	-0.0037	0.0018	0.038	681491
rs9610583	22:37193986	0	IFT27	A/C	0.6677	0.0041	0.002	0.038	657347
rs6139696	20:5325798	5	PROKR2	A/C	0.8259	-0.0048	0.0023	0.038	691916
rs2997488	1:243613000	0	SDCCAG8	A/G	0.05987	0.0085	0.0041	0.038	667812
rs3734355	6:100868721	14	SIM1	A/G	0.1348	0.0052	0.0025	0.038	692434
rs7768342	6:100801811	1	SIM1	C/G	0.4616	-0.0036	0.0017	0.038	692142
rs886528	16:3811556	0	CREBBP	A/G	0.5505	0.0034	0.0017	0.039	794326
rs2191032	3:45906572	5	LZTFL1	T/C	0.7855	0.0043	0.0021	0.039	692492
rs1753990	6:84729122	14	MRAP2	T/G	0.2587	-0.0041	0.002	0.039	690989
rs11793903	9:87263753	1	NTRK2	A/G	0.05893	-0.0079	0.0038	0.039	675635
rs6997684	8:117914100	5	RAD21	A/C	0.4271	-0.0035	0.0017	0.039	773124
rs2242501	11:8118103	1	TUB	A/G	0.2621	0.0041	0.002	0.039	691557
rs7481121	11:8120902	0	TUB	A/G	0.08577	-0.0068	0.0033	0.039	676999
rs10231297	7:33385529	1	BBS9	A/G	0.03198	-0.0106	0.0052	0.04	646849
rs2172229	11:27776622	0	BDNF	A/G	0.5983	0.0037	0.0018	0.04	680837
rs12232308	15:93409054	1	CHD2	A/G	0.5923	0.0037	0.0018	0.04	691130
rs6053314	20:5309726	6	PROKR2	T/C	0.96802	-0.0096	0.0047	0.04	686114
rs7073594	10:112714497	4	BBIP1	A/G	0.05127	-0.0077	0.0038	0.041	692025
rs7814035	8:96301273	1	C8orf37	T/C	0.06881	-0.007	0.0034	0.041	692570
rs2057291	20:57472043	6	GNAS	A/G	0.3391	0.0037	0.0018	0.041	688481
rs16991555	20:10402591	0	MKKS	T/C	0.9468	0.0078	0.0038	0.041	691938
rs2841292	6:100793443	0	SIM1	T/C	0.6769	-0.0038	0.0019	0.041	679061
rs7170382	15:93415051	0	CHD2	C/G	0.6373	-0.0037	0.0018	0.042	676460
rs9611502	22:41531236	2	EP300	T/C	0.03929	-0.0094	0.0046	0.042	675715
rs12211611	6:57065443	3	RAB23	C/G	0.1964	0.0045	0.0022	0.042	689226
rs11685079	2:63374600	6	WDPCP	T/C	0.111	-0.0056	0.0028	0.043	689889
rs7290458	22:41476337	5	EP300	T/C	0.6269	-0.0036	0.0018	0.044	692638
rs2699396	2:63488790	5	WDPCP	T/C	0.4153	0.0033	0.0016	0.044	792215
rs1949411	2:63571808	2	WDPCP	T/C	0.1694	-0.0044	0.0022	0.045	793948
rs11137281	9:140760661	1	EHMT1	T/C	0.1877	-0.0045	0.0023	0.046	664468
rs1565449	9:87650969	0	NTRK2	A/G	0.02356	-0.0124	0.0062	0.046	658570
rs2322157	3:71879031	0	PROK2	A/C	0.1399	0.0051	0.0025	0.046	691828
rs6669104	1:243396119	25	SDCCAG8	T/C	0.3628	0.0036	0.0018	0.046	692293
rs11195232	10:112375282	0	SMC3	A/G	0.2706	0.0042	0.0021	0.046	650595
rs11689644	2:63709708	0	WDPCP	T/G	0.90961	0.0059	0.0029	0.046	692236
rs4526432	9:140734161	1	EHMT1	T/C	0.5541	-0.0034	0.0017	0.047	691921
rs4129472	5:42523172	0	GHR	T/C	0.8033	0.0043	0.0022	0.047	671467
rs13300554	9:139357939	0	INPP5E	A/G	0.97919	0.0153	0.0077	0.047	525193
rs12195875	6:57063946	0	RAB23	A/G	0.8127	-0.0042	0.0021	0.047	795098
rs9935360	16:56576390	0	BBS2	T/C	0.553	-0.0036	0.0018	0.048	672324
rs6070620	20:57384175	0	GNAS	T/C	0.1905	0.0043	0.0022	0.048	678262
rs7614342	3:45940817	0	LZTFL1	A/T	0.8417	-0.0043	0.0022	0.048	788280
rs6076810	20:5305638	6	PROKR2	A/G	0.96825	-0.0093	0.0047	0.048	674757
rs3778033	6:100875516	1	SIM1	T/C	0.7978	-0.0042	0.0021	0.048	692597
rs10519485	15:25602101	0	UBE3A	A/C	0.98877	0.0151	0.0076	0.048	521585
rs7713754	5:132295316	0	AFF4	T/C	0.98088	0.0122	0.0062	0.049	593798
rs7925108	11:66234023	3	BBS1	A/G	0.4032	0.0034	0.0017	0.049	692306
rs182221	16:56599221	0	BBS2	C/G	0.2059	0.0043	0.0022	0.049	689240
rs12045585	1:243673099	0	SDCCAG8	A/G	0.132	-0.0053	0.0027	0.049	672227
rs13218361	6:100788251	0	SIM1	T/C	0.09302	-0.0064	0.0032	0.049	574072
rs4429143	12:88409194	1	CEP290	A/G	0.3834	0.0035	0.0018	0.05	668830
rs7026417	9:87589165	3	NTRK2	T/C	0.90061	0.0055	0.0028	0.05	692304
rs12547260	8:100916000	1	VPS13B	T/C	0.8488	-0.0048	0.0024	0.05	677347
rs11683229	2:63596836	5	WDPCP	A/G	0.8859	0.0053	0.0027	0.05	691685
rs3787493	20:57481148	2	GNAS	A/G	0.4835	-0.0034	0.0017	0.052	692603
rs2159272	3:45829995	0	LZTFL1	A/G	0.5599	0.0034	0.0017	0.052	692531
rs6496996	15:93402496	2	CHD2	A/G	0.2024	0.0042	0.0022	0.053	691787
rs2144650	20:57535425	0	GNAS	T/C	0.95077	-0.0083	0.0043	0.053	670881
rs2480201	6:84805699	0	MRAP2	T/C	0.05583	0.0076	0.0039	0.053	687587
rs4758287	11:8099913	0	TUB	A/C	0.2882	0.0038	0.0019	0.053	679358
rs12447611	16:56576670	0	BBS2	C/G	0.2722	0.0038	0.002	0.055	687838
rs7389498	9:140738231	0	EHMT1	A/G	0.4179	0.0034	0.0018	0.055	680687
rs935545	3:71778922	0	PROK2	C/G	0.7377	-0.0038	0.002	0.055	683454
rs4979643	9:140638607	26	EHMT1	A/T	0.7084	-0.0036	0.0019	0.056	687697
rs4733930	8:38311001	0	FGFR1	T/C	0.4242	0.0036	0.0019	0.056	612085
rs4812042	20:57461915	4	GNAS	A/G	0.6312	-0.0035	0.0018	0.057	678766
rs4820250	22:37197530	8	IFT27	A/G	0.1508	-0.0043	0.0023	0.057	792832
rs3935070	15:23784767	0	MKRN3	C/G	0.4208	-0.0034	0.0018	0.057	669246
rs3758317	9:87282615	1	NTRK2	T/C	0.1735	-0.0043	0.0023	0.057	690645
rs8004648	14:89394228	1	TTC8	T/C	0.8998	-0.0052	0.0027	0.057	783463
rs17348221	2:63467915	0	WDPCP	A/C	0.98416	0.0165	0.0087	0.057	653888
rs10501089	11:27788859	5	BDNF	T/C	0.0342	0.0083	0.0044	0.058	690360
rs292182	5:36954812	24	NIPBL	A/G	0.438	-0.0031	0.0016	0.058	794111
rs7947020	11:7993439	1	TUB	A/T	0.08904	-0.0057	0.003	0.058	688419
rs9619950	22:41565051	0	EP300	T/C	0.04671	0.0079	0.0042	0.059	649522
rs2910875	5:42719826	12	GHR	A/G	0.4491	-0.0032	0.0017	0.059	692569
rs4906693	15:25151839	0	SNURF	T/C	0.3685	0.0035	0.0019	0.059	671162
rs3739570	9:87637578	0	NTRK2	A/G	0.08518	-0.0056	0.003	0.06	690261
rs12793160	11:8018292	0	TUB	A/G	0.02035	0.0125	0.0067	0.06	630784
rs130024	16:3834316	0	CREBBP	T/C	0.92861	-0.0068	0.0036	0.061	660372
rs7825829	8:38362521	0	FGFR1	A/G	0.90681	0.0057	0.003	0.061	675375
rs7034337	9:139376599	0	INPP5E	A/C	0.01824	-0.0151	0.008	0.061	497719
rs708458	5:132208686	11	AFF4	A/G	0.09583	0.0055	0.0029	0.062	692567
rs12238811	9:87372352	5	NTRK2	T/C	0.04408	-0.0078	0.0042	0.062	691994
rs7192369	16:56576806	0	BBS2	A/G	0.4771	0.0033	0.0018	0.063	688042
rs282233	16:56597483	5	BBS2	T/C	0.07601	0.0057	0.0031	0.064	771498
rs13013167	2:170402629	2	BBS5	T/C	0.1812	0.0042	0.0022	0.064	692058
rs1129767	9:140638416	0	EHMT1	A/G	0.1889	0.0042	0.0023	0.064	688096
rs10868223	9:87265126	0	NTRK2	T/C	0.1141	-0.0051	0.0027	0.064	690788
rs11899838	2:63478136	0	WDPCP	T/C	0.1268	0.0049	0.0026	0.065	690456
rs2113315	16:56597427	0	BBS2	A/G	0.5848	-0.0033	0.0018	0.066	682464
rs4295775	9:139300032	6	INPP5E	T/C	0.8658	-0.0046	0.0025	0.066	692350
rs8047140	16:29922988	0	KCTD13	T/C	0.1152	-0.0052	0.0028	0.066	620771
rs1474337	12:76768415	4	BBS10	T/C	0.532	0.0032	0.0017	0.067	691441
rs10486537	7:33596515	3	BBS9	A/G	0.8956	-0.0053	0.0029	0.067	692605
rs1918849	11:8063419	1	TUB	A/G	0.8399	0.0044	0.0024	0.067	686938
rs370617	4:123640865	18	BBS12	T/C	0.6797	-0.0034	0.0018	0.068	692580
rs4642376	5:42432739	44	GHR	T/G	0.1926	0.0038	0.0021	0.068	780661
rs4857288	3:97440269	0	ARL6	A/C	0.6784	-0.0034	0.0019	0.069	676959
rs7926527	11:8099189	0	TUB	T/C	0.6473	-0.0033	0.0018	0.069	685840
rs12471038	2:63484639	10	WDPCP	A/C	0.2016	-0.0039	0.0021	0.069	691108
rs1387923	9:87640636	8	NTRK2	A/G	0.4336	-0.0031	0.0017	0.07	691339
rs2135976	4:122816181	1	BBS7	T/C	0.06519	0.0064	0.0035	0.071	692078
rs11076156	16:56578118	0	BBS2	A/G	0.5717	-0.0032	0.0018	0.072	690090
rs10262995	7:33550041	0	BBS9	T/C	0.1162	-0.0049	0.0027	0.072	692544
rs8124207	20:57522704	0	GNAS	C/G	0.1335	0.0048	0.0027	0.072	674470
rs9289469	3:97566427	13	ARL6	A/G	0.7879	0.0037	0.0021	0.073	690105
rs2501567	9:140529495	0	EHMT1	T/G	0.8344	-0.0043	0.0024	0.073	686133
rs11950346	5:36965357	0	NIPBL	A/G	0.03508	0.0074	0.0041	0.073	660722
rs6433120	2:170303507	7	BBS5	T/C	0.7053	-0.0034	0.0019	0.074	692536
rs9287915	2:170317008	17	BBS5	T/G	0.7848	-0.0037	0.0021	0.074	692357
rs3762839	4:122825364	0	BBS7	A/C	0.8624	-0.0045	0.0025	0.074	684155
rs4962227	9:140507688	13	EHMT1	T/C	0.8667	-0.0046	0.0026	0.074	691166
rs6576432	15:23782525	0	MKRN3	A/G	0.03637	-0.0091	0.0051	0.074	620864
rs11869817	17:56254899	1	MKS1	C/G	0.1187	-0.0048	0.0027	0.074	683944
rs12148636	15:23974858	0	NDN	A/T	0.3434	0.0034	0.0019	0.074	636853
rs17124951	14:89370761	2	TTC8	T/C	0.8541	0.0044	0.0025	0.074	691724
rs10084869	4:123696907	1	BBS12	T/G	0.7164	-0.0035	0.0019	0.075	684925
rs17199009	16:3867081	0	CREBBP	A/G	0.94411	-0.0063	0.0035	0.075	673248
rs13332660	16:29905882	1	KCTD13	T/C	0.174	0.0039	0.0022	0.075	728482
rs11636696	15:93576982	0	CHD2	T/C	0.4536	0.0031	0.0018	0.076	671462
rs884808	1:243653439	3	SDCCAG8	T/C	0.2225	-0.0036	0.0021	0.076	684714
rs6499839	16:56576608	0	BBS2	T/C	0.1019	0.0052	0.0029	0.077	676038
rs11145915	9:139302049	2	INPP5E	A/T	0.793	-0.0038	0.0021	0.077	690388
rs11907058	20:10343298	0	MKKS	A/G	0.98854	-0.0157	0.0089	0.078	616853
rs7161561	14:89311817	0	TTC8	A/G	0.9817	0.012	0.0068	0.078	682677
rs17197056	12:76744844	4	BBS10	A/G	0.1967	-0.0038	0.0022	0.079	691911
rs401864	6:100961198	0	SIM1	T/C	0.92703	0.0061	0.0035	0.079	691988
rs12793805	11:8066051	0	TUB	C/G	0.4058	-0.0032	0.0018	0.079	680293
rs10504946	8:96301075	1	C8orf37	A/G	0.08805	-0.0054	0.0031	0.08	680707
rs4815785	20:5281253	12	PROKR2	A/G	0.7477	-0.0035	0.002	0.08	692555
rs6107621	20:5327322	2	PROKR2	C/G	0.729	0.0034	0.0019	0.08	686196
rs4568935	10:112385103	2	SMC3	A/G	0.6446	0.0032	0.0018	0.08	674212
rs10769866	11:8076151	0	TUB	C/G	0.645	0.0032	0.0018	0.08	681957
rs7835921	8:96276292	3	C8orf37	A/G	0.4856	-0.003	0.0017	0.081	689240
rs129988	16:3763179	0	CREBBP	A/G	0.07314	0.0058	0.0033	0.081	671376
rs2239318	16:3924937	2	CREBBP	T/C	0.09711	-0.005	0.0029	0.081	692499
rs13064991	3:45834811	0	LZTFL1	T/G	0.1704	-0.004	0.0023	0.081	682619
rs10839968	11:8057387	3	TUB	C/G	0.94224	0.0065	0.0037	0.081	688549
rs13025357	2:63777236	4	WDPCP	A/T	0.1946	-0.0036	0.0021	0.081	791967
rs2165554	9:119479774	0	TRIM32	T/C	0.37	-0.0031	0.0018	0.082	683710
rs7480804	11:8109809	0	TUB	A/T	0.90862	0.0053	0.003	0.082	673743
rs4735639	8:100743556	2	VPS13B	A/C	0.90692	-0.0052	0.003	0.082	691681
rs3794702	16:3730613	0	CREBBP	A/T	0.1957	0.0038	0.0022	0.083	675189
rs769242	4:122742217	0	BBS7	T/C	0.04578	-0.0072	0.0042	0.084	675990
rs4733951	8:38369831	0	FGFR1	A/C	0.1728	-0.004	0.0023	0.084	692359
rs1856800	10:112309641	0	SMC3	A/T	0.1223	-0.0046	0.0027	0.084	691406
rs17170324	7:33683841	0	BBS9	C/G	0.1299	-0.0045	0.0026	0.085	594823
rs6971826	7:33569954	4	BBS9	T/G	0.5502	-0.003	0.0017	0.085	689699
rs2636320	1:243501056	12	SDCCAG8	A/C	0.5362	0.003	0.0017	0.085	691068
rs10125636	9:119489471	0	TRIM32	T/C	0.4754	-0.0029	0.0017	0.085	775361
rs12421620	11:66276576	0	BBS1	A/G	0.01883	0.0119	0.007	0.086	641807
rs17610266	9:139350595	0	INPP5E	A/G	0.04151	-0.0077	0.0045	0.086	587934
rs11145824	9:139280631	4	INPP5E	T/C	0.1694	0.0039	0.0023	0.087	692317
rs7913383	10:112321969	2	SMC3	T/C	0.92686	0.0058	0.0034	0.087	678431
rs929037	22:37130078	5	IFT27	A/G	0.03379	-0.0079	0.0046	0.088	678474
rs2497109	6:84747816	5	MRAP2	A/G	0.04613	0.0075	0.0044	0.088	678366
rs592196	16:56575062	2	BBS2	T/G	0.7733	-0.0035	0.0021	0.09	692589
rs5751033	22:41471003	1	EP300	T/C	0.4086	0.003	0.0018	0.09	690271
rs6085109	20:5311304	0	PROKR2	A/G	0.8349	0.0041	0.0024	0.09	683284
rs6991815	8:117825068	0	RAD21	A/G	0.8714	0.0044	0.0026	0.09	691873
rs3820700	2:73716810	43	ALMS1	A/G	0.1394	0.0042	0.0025	0.091	692576
rs6873545	5:42631264	40	GHR	T/C	0.7284	0.0031	0.0018	0.091	793986
rs9692508	7:33152668	0	BBS9	A/G	0.0967	-0.005	0.003	0.092	665157
rs17496925	9:140640154	0	EHMT1	T/C	0.06443	0.006	0.0035	0.092	687606
rs17433014	22:41499822	0	EP300	A/G	0.03713	-0.0079	0.0047	0.092	682480
rs2501559	9:140565196	2	EHMT1	T/C	0.7284	-0.0032	0.0019	0.093	692508
rs4906715	15:25725296	4	UBE3A	A/T	0.96135	0.0075	0.0045	0.093	763775
rs8044810	16:56567104	2	BBS2	A/C	0.95966	-0.0071	0.0043	0.094	690496
rs11140748	9:87361520	0	NTRK2	T/C	0.94837	0.0067	0.004	0.094	664155
rs4821536	22:37209447	6	IFT27	T/C	0.92511	0.0055	0.0033	0.095	690986
rs11140831	9:87647454	0	NTRK2	A/G	0.4764	-0.003	0.0018	0.095	669399
rs1406094	11:8061926	0	TUB	A/C	0.1202	0.0044	0.0026	0.095	760990
rs13013890	2:63654109	0	WDPCP	A/G	0.1135	-0.0046	0.0027	0.095	687048
rs12533104	7:33639080	1	BBS9	T/G	0.06677	0.0058	0.0035	0.096	691250
rs130005	16:3828348	4	CREBBP	A/G	0.8914	0.0046	0.0028	0.096	692245
rs7389298	9:140755119	1	EHMT1	T/C	0.7931	-0.0038	0.0023	0.096	593420
rs10743052	11:8174966	9	TUB	A/G	0.3593	0.003	0.0018	0.096	691781
rs7603593	2:63458074	3	WDPCP	T/C	0.7722	-0.0034	0.0021	0.096	690026
rs2072380	16:3738961	0	CREBBP	T/G	0.7561	0.0035	0.0021	0.097	667078
rs6108516	20:10357002	0	MKKS	A/G	0.135	-0.0043	0.0026	0.097	675613
rs4658570	1:243611301	1	SDCCAG8	T/C	0.04198	-0.0074	0.0045	0.098	686363
rs4141711	9:119471881	2	TRIM32	T/C	0.1763	0.0038	0.0023	0.098	691537
rs182662	6:57054008	0	RAB23	T/C	0.02502	-0.0111	0.0067	0.099	583828
rs1466656	1:243526476	1	SDCCAG8	A/T	0.93937	0.0061	0.0037	0.099	687568
rs139873	22:38359667	0	SOX10	A/C	0.7406	-0.0033	0.002	0.099	687540
rs940302	12:76710877	7	BBS10	A/G	0.4355	0.0028	0.0017	0.1	687406
rs10518290	4:122805872	0	BBS7	A/G	0.94726	-0.0066	0.004	0.1	687638
rs17398251	7:33335960	6	BBS9	T/C	0.1663	-0.0037	0.0023	0.1	691343
rs2598409	7:33576738	0	BBS9	T/C	0.93177	-0.0057	0.0035	0.1	667306
rs8039293	15:93565490	1	CHD2	C/G	0.5712	0.003	0.0018	0.1	666715
rs2865718	20:57526412	5	GNAS	A/G	0.7667	-0.0034	0.0021	0.1	691523
rs8027177	15:23798842	1	MKRN3	C/G	0.3872	0.0027	0.0017	0.1	786863
rs10853004	17:56271497	1	MKS1	A/G	0.6784	0.003	0.0019	0.1	685092
rs11745128	5:36828019	0	NIPBL	A/G	0.8708	-0.0042	0.0026	0.1	691342
rs3780646	9:87559882	13	NTRK2	A/G	0.04081	0.0071	0.0043	0.1	692011
rs7026337	9:87568014	9	NTRK2	A/G	0.07612	0.0053	0.0033	0.1	691975
rs6549411	3:71880648	0	PROK2	T/C	0.8165	-0.0037	0.0022	0.1	691914
rs6459182	6:57126898	0	RAB23	A/G	0.6109	-0.0028	0.0017	0.1	771502
rs12449524	17:17596461	0	RAI1	A/C	0.2722	0.0032	0.002	0.1	688008
rs17060420	6:100811392	1	SIM1	A/G	0.91183	-0.005	0.0031	0.1	691479
rs6468694	8:100865836	11	VPS13B	A/G	0.1303	0.0042	0.0026	0.1	692606
rs4918615	10:112714571	4	BBIP1	A/G	0.05648	-0.0062	0.0039	0.11	691907
rs16856986	2:170344115	4	BBS5	T/G	0.04566	0.0065	0.0041	0.11	691135
rs1978332	7:33274869	0	BBS9	T/C	0.98439	-0.012	0.0075	0.11	649288
rs7779722	7:33598621	4	BBS9	A/G	0.4111	0.0028	0.0018	0.11	691424
rs12378717	9:139286060	7	INPP5E	C/G	0.2537	-0.0032	0.002	0.11	692565
rs6104583	20:10337546	4	MKKS	A/G	0.6777	0.0029	0.0019	0.11	692553
rs11637292	15:23765819	1	MKRN3	A/G	0.203	0.0036	0.0022	0.11	671763
rs10868238	9:87530935	1	NTRK2	T/C	0.4045	0.0028	0.0018	0.11	691963
rs6085122	20:5329782	6	PROKR2	T/C	0.2041	-0.0034	0.0021	0.11	690235
rs2921740	8:117929015	0	RAD21	A/G	0.593	-0.0028	0.0018	0.11	684867
rs3020152	8:117916470	0	RAD21	A/C	0.5621	-0.0028	0.0017	0.11	684768
rs11807000	1:243398183	0	SDCCAG8	A/T	0.91271	0.0049	0.003	0.11	665379
rs12202773	6:100824250	0	SIM1	A/G	0.09127	0.0046	0.0029	0.11	689883
rs1395118	6:100791267	0	SIM1	T/G	0.7717	-0.0032	0.0021	0.11	685619
rs1506079	6:100798472	0	SIM1	T/C	0.09483	-0.0046	0.0028	0.11	745283
rs11195176	10:112310942	9	SMC3	T/C	0.1385	0.004	0.0025	0.11	692351
rs4438460	2:63678069	0	WDPCP	T/C	0.93604	-0.0065	0.0041	0.11	542596
rs6546024	2:63921775	0	WDPCP	A/C	0.4168	0.0027	0.0017	0.11	688166
rs780396	2:73694764	1	ALMS1	A/G	0.843	-0.0037	0.0024	0.12	691344
rs4857287	3:97435665	0	ARL6	T/G	0.04519	0.0073	0.0047	0.12	660386
rs4018628	12:76723617	0	BBS10	A/G	0.7987	0.0034	0.0022	0.12	685824
rs746271	2:170429975	0	BBS5	A/G	0.1397	0.0039	0.0025	0.12	636955
rs12154346	7:33543638	0	BBS9	A/G	0.8853	0.0044	0.0028	0.12	685346
rs17170282	7:33573216	0	BBS9	A/G	0.97042	0.0083	0.0053	0.12	675806
rs12320540	12:88401806	21	CEP290	A/G	0.09331	0.0044	0.0028	0.12	794997
rs12677998	8:38249201	0	FGFR1	A/G	0.09167	-0.0042	0.0027	0.12	679735
rs4130114	5:42514509	15	GHR	T/G	0.5411	0.0027	0.0017	0.12	692315
rs6100269	20:57479276	0	GNAS	T/C	0.09916	0.0046	0.003	0.12	672590
rs5750309	22:37199022	1	IFT27	T/C	0.3415	0.0029	0.0019	0.12	683758
rs6032871	20:10368744	0	MKKS	C/G	0.8068	0.0035	0.0023	0.12	679987
rs6077793	20:10422512	3	MKKS	T/G	0.1111	-0.0042	0.0027	0.12	692293
rs9635419	15:24965831	0	NPAP1	A/G	0.95574	-0.0092	0.0059	0.12	488984
rs11788989	9:87541540	10	NTRK2	T/C	0.96264	-0.0073	0.0047	0.12	691298
rs1867283	9:87450766	0	NTRK2	A/G	0.496	-0.0027	0.0018	0.12	683830
rs2378672	9:87631034	0	NTRK2	T/C	0.92388	-0.005	0.0032	0.12	688645
rs2658153	6:100784837	2	SIM1	A/G	0.09255	0.0047	0.003	0.12	692588
rs1885189	14:89387328	2	TTC8	T/G	0.6361	-0.0028	0.0018	0.12	691028
rs10769873	11:8157610	5	TUB	T/C	0.7618	-0.0031	0.002	0.12	692105
rs12674812	8:100848480	2	VPS13B	A/G	0.8252	0.0035	0.0023	0.12	685980
rs254290	5:132179721	0	AFF4	A/G	0.1541	0.0039	0.0026	0.13	623798
rs1052161	2:73828538	39	ALMS1	A/G	0.629	-0.0025	0.0017	0.13	795520
rs12594938	15:73071282	0	BBS4	A/G	0.1318	-0.0039	0.0026	0.13	691497
rs12502635	4:122813459	0	BBS7	A/G	0.304	0.0029	0.0019	0.13	686164
rs2392246	7:33571828	3	BBS9	T/C	0.5286	-0.0026	0.0017	0.13	692592
rs10767652	11:27628826	1	BDNF	A/G	0.5223	0.0025	0.0016	0.13	791169
rs11775320	8:96306959	2	C8orf37	A/G	0.94077	0.0058	0.0038	0.13	680517
rs894153	8:96232747	1	C8orf37	A/G	0.6667	-0.0028	0.0019	0.13	686939
rs6497013	15:93544053	13	CHD2	A/G	0.6152	0.0027	0.0018	0.13	692425
rs11137172	9:140561630	14	EHMT1	A/G	0.1637	0.0036	0.0023	0.13	692087
rs2501557	9:140569260	0	EHMT1	T/C	0.1641	0.0034	0.0023	0.13	689449
rs1033612	22:41558365	0	EP300	C/G	0.97743	-0.0097	0.0063	0.13	657248
rs2932005	8:38231874	0	FGFR1	T/C	0.3343	-0.0028	0.0018	0.13	688956
rs2480181	6:84740396	0	MRAP2	A/G	0.04151	0.007	0.0046	0.13	677853
rs11140778	9:87447158	0	NTRK2	A/T	0.7882	-0.0033	0.0022	0.13	668550
rs1555324	20:5303028	2	PROKR2	C/G	0.173	0.0035	0.0023	0.13	689022
rs9403683	6:100802068	1	SIM1	A/C	0.8724	-0.0037	0.0025	0.13	792525
rs7918332	10:112323154	0	SMC3	A/G	0.06858	-0.0054	0.0035	0.13	684899
rs10739472	9:119511492	8	TRIM32	T/C	0.3891	0.0027	0.0018	0.13	690404
rs4512892	11:8112140	0	TUB	T/C	0.04964	0.0059	0.0039	0.13	666464
rs7559197	2:63937382	3	WDPCP	A/G	0.04818	-0.0063	0.0042	0.13	692074
rs3759141	12:76779841	2	BBS10	A/C	0.8864	0.0041	0.0028	0.14	690907
rs450079	16:56587725	0	BBS2	A/T	0.3138	0.0028	0.0019	0.14	669855
rs10253978	7:33554672	0	BBS9	A/G	0.91423	-0.0045	0.0031	0.14	675422
rs13240939	7:33339742	0	BBS9	A/G	0.97275	-0.0077	0.0052	0.14	510128
rs17170309	7:33636483	0	BBS9	C/G	0.93545	-0.0054	0.0036	0.14	690906
rs1552736	11:27763277	1	BDNF	A/G	0.4019	-0.0026	0.0018	0.14	689437
rs2131060	11:27773337	1	BDNF	A/C	0.1092	0.0041	0.0028	0.14	679903
rs10079480	5:42385855	0	GHR	A/G	0.4434	0.0026	0.0018	0.14	676552
rs3730168	20:57478939	0	GNAS	A/G	0.3211	0.0028	0.0019	0.14	691926
rs738519	22:37122351	2	IFT27	T/C	0.1171	-0.0039	0.0027	0.14	690637
rs7311091	12:49383207	0	KMT2D	T/C	0.07554	0.0052	0.0035	0.14	668410
rs7225148	17:56293960	0	MKS1	T/C	0.6955	0.0027	0.0019	0.14	691999
rs614886	9:87682475	10	NTRK2	A/C	0.2969	-0.0028	0.0019	0.14	692142
rs2038410	20:5249302	0	PROKR2	T/C	0.4367	-0.0025	0.0017	0.14	691092
rs9896880	17:17535911	1	RAI1	A/G	0.08261	-0.0048	0.0032	0.14	690359
rs10927025	1:243639218	0	SDCCAG8	T/C	0.603	-0.0026	0.0018	0.14	687051
rs3006925	1:243609927	0	SDCCAG8	T/C	0.2224	0.0031	0.0021	0.14	691347
rs9403695	6:100810976	0	SIM1	A/C	0.09711	0.0044	0.003	0.14	685907
rs3026645	22:38375839	0	SOX10	C/G	0.94148	0.0057	0.0038	0.14	676031
rs7156823	14:89240649	0	TTC8	A/G	0.1284	0.0038	0.0026	0.14	691183
rs2272382	11:8111540	0	TUB	T/C	0.3199	0.0028	0.0019	0.14	667812
rs13263759	8:100252754	0	VPS13B	T/C	0.1473	0.0037	0.0025	0.14	673899
rs9309356	2:63943016	13	WDPCP	A/C	0.7748	-0.0029	0.0019	0.14	793963
rs9810858	3:97563811	8	ARL6	A/T	0.5118	0.0025	0.0017	0.15	688852
rs129986	16:3804241	0	CREBBP	T/C	0.98556	0.0082	0.0056	0.15	628842
rs7845393	8:38359468	0	FGFR1	A/C	0.1758	0.0034	0.0023	0.15	691179
rs1509461	5:42407860	7	GHR	T/C	0.562	0.0023	0.0016	0.15	794274
rs4821529	22:37196448	0	IFT27	T/C	0.0853	-0.0047	0.0032	0.15	673956
rs762920	22:37212536	1	IFT27	A/C	0.09185	-0.0044	0.003	0.15	689113
rs158790	5:36837911	0	NIPBL	T/C	0.6147	0.0026	0.0018	0.15	690724
rs10926977	1:243411367	5	SDCCAG8	T/G	0.864	0.0037	0.0026	0.15	691759
rs10927026	1:243647497	0	SDCCAG8	A/G	0.93551	0.0057	0.004	0.15	605826
rs10983311	9:119470373	1	TRIM32	A/T	0.2154	-0.003	0.0021	0.15	689257
rs11041732	11:8093801	0	TUB	A/G	0.101	-0.0041	0.0029	0.15	671873
rs17617459	2:63660902	0	WDPCP	T/C	0.06554	0.005	0.0035	0.15	675240
rs3806613	3:97486862	1	ARL6	C/G	0.98521	0.0102	0.0072	0.16	651342
rs11107511	12:76699961	8	BBS10	T/G	0.5871	-0.0024	0.0017	0.16	691992
rs7967327	12:76696901	4	BBS10	A/C	0.3132	0.0026	0.0018	0.16	692447
rs6825926	4:122719712	0	BBS7	T/C	0.06414	0.005	0.0035	0.16	691861
rs10281469	7:33144273	15	BBS9	T/G	0.495	-0.0024	0.0017	0.16	692143
rs10951388	7:33461577	2	BBS9	T/C	0.2984	-0.0027	0.0019	0.16	690006
rs2700695	7:33607662	0	BBS9	T/C	0.8104	-0.0031	0.0022	0.16	679353
rs10780190	9:140692372	2	EHMT1	T/C	0.06069	0.0054	0.0039	0.16	613588
rs11744988	5:42474696	0	GHR	T/C	0.06402	-0.005	0.0036	0.16	692363
rs6100233	20:57383686	0	GNAS	T/C	0.02859	-0.0076	0.0054	0.16	678926
rs780090	2:27718474	0	IFT172	T/C	0.08653	-0.0042	0.003	0.16	790063
rs4390848	22:37135305	4	IFT27	A/G	0.8276	0.0032	0.0023	0.16	688734
rs12684483	9:139351737	0	INPP5E	A/G	0.03648	-0.0072	0.005	0.16	529824
rs11916880	3:45888757	0	LZTFL1	A/C	0.06542	0.0049	0.0035	0.16	691806
rs7653640	3:45832958	2	LZTFL1	T/C	0.8362	0.0032	0.0023	0.16	741859
rs6133876	20:10334005	0	MKKS	A/G	0.2016	-0.0031	0.0022	0.16	685875
rs2324637	6:84829099	2	MRAP2	T/C	0.05034	0.0057	0.004	0.16	689345
rs8025564	15:23975482	2	NDN	T/C	0.95405	0.0063	0.0045	0.16	568250
rs11140751	9:87366089	0	NTRK2	A/C	0.98392	0.0094	0.0067	0.16	649349
rs11140784	9:87459423	0	NTRK2	A/G	0.97848	-0.009	0.0065	0.16	666098
rs1439050	9:87288193	0	NTRK2	T/G	0.3224	-0.0026	0.0018	0.16	691756
rs3780635	9:87507275	12	NTRK2	A/G	0.93896	-0.0048	0.0034	0.16	792607
rs6053331	20:5327694	3	PROKR2	T/G	0.3533	0.0026	0.0018	0.16	686332
rs4074643	17:17619859	3	RAI1	T/C	0.3566	-0.0026	0.0018	0.16	689333
rs7209595	17:17632919	0	RAI1	C/G	0.4749	-0.0024	0.0017	0.16	683872
rs10926975	1:243397782	0	SDCCAG8	T/C	0.2578	-0.0028	0.002	0.16	690999
rs12239876	1:243546954	10	SDCCAG8	A/C	0.90049	0.0041	0.0029	0.16	691856
rs1441743	9:119493226	7	TRIM32	A/T	0.613	-0.0025	0.0018	0.16	691672
rs398418	4:123626249	1	BBS12	T/C	0.03543	-0.0068	0.0049	0.17	596753
rs381681	16:56562470	0	BBS2	A/G	0.9765	-0.0077	0.0055	0.17	671661
rs12612343	2:170306828	0	BBS5	A/G	0.97825	0.0075	0.0054	0.17	671396
rs3730172	20:57484326	3	GNAS	C/G	0.98521	0.0117	0.0086	0.17	581191
rs4820254	22:37206341	0	IFT27	T/G	0.5569	0.0024	0.0018	0.17	681677
rs1488369	3:45885360	2	LZTFL1	T/C	0.5643	0.0024	0.0017	0.17	689239
rs225149	20:10455168	0	MKKS	A/G	0.1128	-0.0043	0.0031	0.17	617002
rs7179053	15:23803295	2	MKRN3	A/G	0.4197	-0.0024	0.0017	0.17	689215
rs7496623	15:23783392	0	MKRN3	T/C	0.07016	-0.0054	0.0039	0.17	604511
rs9449777	6:84799231	14	MRAP2	T/G	0.06852	0.0047	0.0034	0.17	690174
rs292174	5:36832141	2	NIPBL	A/G	0.2964	-0.0026	0.0019	0.17	691008
rs1627784	9:87428866	5	NTRK2	T/C	0.7066	0.0026	0.0019	0.17	691013
rs4486281	9:87455347	0	NTRK2	A/G	0.7047	-0.0027	0.002	0.17	684590
rs6559836	9:87533389	0	NTRK2	A/G	0.7965	-0.0031	0.0022	0.17	679843
rs2875986	20:5240592	0	PROKR2	T/G	0.3002	0.0026	0.0019	0.17	692473
rs3020139	8:117900084	27	RAD21	A/C	0.02076	0.0088	0.0064	0.17	681550
rs8067800	17:17573539	4	RAI1	A/G	0.4055	-0.0024	0.0018	0.17	690428
rs10734628	11:8056748	3	TUB	A/C	0.1927	-0.003	0.0022	0.17	692162
rs2189714	15:25733444	2	UBE3A	T/C	0.2162	0.0029	0.0021	0.17	688755
rs8039641	15:25640785	0	UBE3A	C/G	0.97533	0.0073	0.0053	0.17	674502
rs1878506	2:63632258	0	WDPCP	T/C	0.03666	-0.0066	0.0048	0.17	684793
rs11195365	10:112643037	0	BBIP1	C/G	0.08302	-0.0042	0.0031	0.18	678834
rs4918605	10:112609805	0	BBIP1	A/G	0.2904	-0.0026	0.0019	0.18	678241
rs17826767	15:73010916	0	BBS4	C/G	0.01409	-0.0074	0.0055	0.18	623227
rs13265527	8:96302931	0	C8orf37	T/G	0.8468	0.0031	0.0023	0.18	688919
rs7731163	5:42666898	2	GHR	A/G	0.07741	0.0043	0.0032	0.18	692060
rs2021918	20:57504836	0	GNAS	A/G	0.06683	0.005	0.0037	0.18	664489
rs4821520	22:37135134	3	IFT27	T/G	0.06706	0.0047	0.0035	0.18	692418
rs10783298	12:49384957	0	KMT2D	A/G	0.90382	0.0042	0.0032	0.18	663808
rs3654	9:87430491	0	NTRK2	T/C	0.94674	-0.0051	0.0038	0.18	679543
rs4677050	3:71868973	1	PROK2	A/C	0.7494	0.0027	0.002	0.18	677291
rs3778515	6:57042709	5	RAB23	T/G	0.768	-0.0028	0.002	0.18	692544
rs4925112	17:17700573	7	RAI1	T/C	0.93686	0.0049	0.0037	0.18	689089
rs12742848	1:243448600	0	SDCCAG8	T/C	0.1475	-0.0033	0.0024	0.18	688189
rs1441744	9:119493194	2	TRIM32	A/C	0.3158	0.0025	0.0019	0.18	692536
rs2280727	11:8037864	1	TUB	A/G	0.479	0.0023	0.0017	0.18	692493
rs4671535	2:64071232	0	WDPCP	A/C	0.8147	0.003	0.0022	0.18	686969
rs1083919	2:73713863	40	ALMS1	C/G	0.3739	0.0023	0.0018	0.19	692448
rs13417370	2:170373591	0	BBS5	A/G	0.5277	-0.0023	0.0017	0.19	689009
rs2683444	2:170423768	7	BBS5	A/G	0.08746	0.0039	0.003	0.19	691797
rs1008582	7:33398931	3	BBS9	C/G	0.1575	0.0031	0.0024	0.19	690976
rs12538649	7:33320648	10	BBS9	C/G	0.3074	-0.0025	0.0019	0.19	691925
rs727155	11:27750449	0	BDNF	T/C	0.03292	-0.0068	0.0052	0.19	657934
rs11776206	8:96307550	0	C8orf37	T/C	0.92166	0.0043	0.0033	0.19	680256
rs902920	8:96301882	0	C8orf37	C/G	0.98457	-0.0086	0.0065	0.19	635811
rs17648433	15:93463702	0	CHD2	T/C	0.1573	-0.0032	0.0025	0.19	674884
rs2978083	8:38288903	0	FGFR1	T/C	0.03999	0.0056	0.0043	0.19	665499
rs1647266	2:27693485	37	IFT172	T/C	0.611	-0.0022	0.0017	0.19	795535
rs4813935	20:10441438	5	MKKS	A/G	0.4928	0.0022	0.0017	0.19	691422
rs3826300	17:56290334	3	MKS1	T/C	0.5574	0.0023	0.0017	0.19	692541
rs11854932	15:24890859	0	NPAP1	A/G	0.163	-0.0032	0.0024	0.19	689834
rs12914251	15:24889850	8	NPAP1	T/C	0.7551	-0.0026	0.002	0.19	692428
rs6053330	20:5326527	1	PROKR2	C/G	0.421	0.0023	0.0018	0.19	688180
rs6679924	1:243393063	3	SDCCAG8	C/G	0.01485	-0.0092	0.007	0.19	679508
rs4918534	10:112299671	1	SMC3	A/G	0.7585	0.0026	0.002	0.19	689823
rs12592731	15:25170170	0	SNURF	A/G	0.6935	-0.0027	0.002	0.19	536740
rs10491577	9:119490474	0	TRIM32	T/C	0.8886	-0.0037	0.0028	0.19	674248
rs24705	5:132206020	11	AFF4	A/G	0.4649	-0.0022	0.0017	0.2	692606
rs254286	5:132198199	2	AFF4	A/G	0.5866	0.0022	0.0017	0.2	691561
rs16968949	16:56509167	0	BBS2	C/G	0.98503	-0.0078	0.0061	0.2	593405
rs10251231	7:33395764	0	BBS9	C/G	0.07875	-0.0046	0.0036	0.2	664152
rs6977744	7:33453281	1	BBS9	T/C	0.93475	0.0044	0.0035	0.2	692570
rs11637884	15:93562523	0	CHD2	T/C	0.8762	-0.0038	0.0029	0.2	658160
rs1541897	8:38363472	0	FGFR1	T/C	0.4681	-0.0023	0.0018	0.2	670740
rs1559286	5:42752037	0	GHR	T/G	0.93943	-0.0044	0.0034	0.2	667779
rs10868222	9:87253362	2	NTRK2	T/C	0.1332	-0.0032	0.0025	0.2	692257
rs2277193	9:87574009	0	NTRK2	T/C	0.6905	0.0025	0.0019	0.2	659374
rs7006899	8:117840484	1	RAD21	C/G	0.6504	0.0023	0.0018	0.2	681242
rs11801121	1:243616265	1	SDCCAG8	A/G	0.01415	0.0099	0.0078	0.2	652589
rs705	15:25219512	6	SNURF	T/C	0.5665	-0.0022	0.0017	0.2	692578
rs1661309	9:119463620	11	TRIM32	A/G	0.1221	0.0034	0.0027	0.2	692611
rs10865342	2:64032474	3	WDPCP	A/T	0.3016	-0.0024	0.0019	0.2	689002
rs6737621	2:63807621	14	WDPCP	A/T	0.7687	-0.0027	0.0021	0.2	690465
rs7369955	2:170300086	1	BBS5	A/T	0.3197	0.0024	0.0019	0.21	683119
rs10257595	7:33626329	4	BBS9	A/G	0.97287	0.0068	0.0055	0.21	691098
rs17170308	7:33636364	0	BBS9	C/G	0.0421	0.0052	0.0041	0.21	793952
rs13268795	8:96322185	3	C8orf37	A/G	0.3182	0.0023	0.0019	0.21	692594
rs6497015	15:93555199	1	CHD2	A/G	0.8025	-0.0028	0.0022	0.21	691563
rs7175070	15:93559515	0	CHD2	T/C	0.9879	0.0124	0.0098	0.21	579594
rs9672839	15:93568884	1	CHD2	A/C	0.6027	0.0023	0.0018	0.21	671086
rs3730173	20:57484934	0	GNAS	T/C	0.05712	0.005	0.004	0.21	675187
rs3787496	20:57438454	0	GNAS	C/G	0.8458	0.0031	0.0025	0.21	684447
rs3812591	9:139341612	2	INPP5E	T/C	0.7233	0.0023	0.0018	0.21	790520
rs13062383	3:45816614	0	LZTFL1	T/C	0.09337	-0.0038	0.0031	0.21	668152
rs13067466	3:45821244	0	LZTFL1	T/G	0.8179	0.0029	0.0024	0.21	597411
rs7648467	3:45936322	3	LZTFL1	A/C	0.01175	0.0096	0.0078	0.21	668890
rs2497143	6:84782139	2	MRAP2	T/C	0.2021	0.0028	0.0022	0.21	689701
rs10868241	9:87593028	0	NTRK2	A/G	0.2753	-0.0024	0.0019	0.21	686176
rs1443445	9:87534158	0	NTRK2	A/G	0.7986	0.0026	0.0021	0.21	774039
rs6987652	8:117882281	4	RAD21	A/G	0.2955	-0.0024	0.0019	0.21	692129
rs7224617	17:17600579	11	RAI1	T/G	0.4918	-0.0022	0.0017	0.21	690882
rs12529445	6:100932782	0	SIM1	A/G	0.04385	0.0054	0.0043	0.21	659334
rs11041718	11:8055268	0	TUB	A/G	0.5378	0.0022	0.0017	0.21	682969
rs17409784	2:63519361	1	WDPCP	A/G	0.97913	0.0081	0.0065	0.21	671422
rs7585588	2:63937462	2	WDPCP	A/T	0.6517	-0.0023	0.0018	0.21	690870
rs12495828	3:97478570	1	ARL6	A/C	0.6891	-0.0023	0.0019	0.22	689717
rs7980676	12:76721367	0	BBS10	A/G	0.3269	0.0023	0.0018	0.22	686502
rs17841923	16:56554118	6	BBS2	T/C	0.96311	-0.0055	0.0044	0.22	686368
rs12906163	15:93567864	0	CHD2	A/C	0.6083	-0.0022	0.0018	0.22	661169
rs12916709	15:93578987	0	CHD2	A/G	0.3096	-0.0023	0.0019	0.22	655892
rs1978877	15:93577383	1	CHD2	T/C	0.455	-0.0022	0.0018	0.22	676123
rs129989	16:3763402	0	CREBBP	T/C	0.03186	0.0069	0.0056	0.22	598625
rs6026524	20:57371801	2	GNAS	A/G	0.176	-0.0028	0.0023	0.22	685416
rs11079339	17:56270442	0	MKS1	A/G	0.8541	0.0029	0.0024	0.22	779705
rs17174698	17:56243860	0	MKS1	A/G	0.8732	-0.0034	0.0028	0.22	680039
rs11633923	15:24891041	0	NPAP1	C/G	0.8673	0.0032	0.0026	0.22	678010
rs6983235	8:117906006	8	RAD21	A/G	0.1093	0.0034	0.0028	0.22	692460
rs11651378	17:17657503	11	RAI1	A/G	0.93715	0.0042	0.0034	0.22	790387
rs12760694	1:243435805	0	SDCCAG8	T/C	0.02467	-0.007	0.0057	0.22	554286
rs10872573	6:100810622	1	SIM1	T/C	0.2777	0.0024	0.0019	0.22	679960
rs4385931	11:8109648	0	TUB	C/G	0.6611	0.0023	0.0019	0.22	665718
rs2279896	3:97512420	9	ARL6	T/C	0.4718	0.002	0.0017	0.23	687378
rs7971281	12:76724809	0	BBS10	T/G	0.5443	-0.0021	0.0017	0.23	687896
rs11692518	2:170306991	0	BBS5	T/G	0.4804	0.0021	0.0017	0.23	689170
rs11760447	7:33429588	1	BBS9	T/C	0.05385	0.0049	0.0041	0.23	617241
rs10870166	9:139316916	7	INPP5E	C/G	0.2899	-0.0023	0.0019	0.23	691955
rs11145904	9:139297946	0	INPP5E	A/C	0.834	-0.0028	0.0023	0.23	689141
rs3812577	9:139299637	3	INPP5E	T/C	0.1244	0.0031	0.0025	0.23	692569
rs17116327	15:23865946	2	MAGEL2	A/G	0.90862	-0.0037	0.003	0.23	688306
rs3742950	15:24922230	0	NPAP1	C/G	0.6674	-0.0022	0.0018	0.23	692136
rs17665544	3:71858990	4	PROK2	A/G	0.91569	0.0039	0.0032	0.23	692282
rs4815778	20:5260333	9	PROKR2	A/G	0.7346	-0.0024	0.002	0.23	691036
rs1553585	6:100808990	0	SIM1	T/C	0.7426	-0.0022	0.0019	0.23	792302
rs4918540	10:112323187	0	SMC3	T/C	0.2199	-0.0025	0.0021	0.23	684043
rs1406095	11:8094682	0	TUB	T/C	0.4861	0.0021	0.0017	0.23	676590
rs4559682	11:8015651	1	TUB	T/C	0.7291	-0.0022	0.0018	0.23	794392
rs11125954	2:63474793	1	WDPCP	T/C	0.322	-0.0022	0.0018	0.23	689609
rs10885059	10:112648598	8	BBIP1	T/C	0.8713	0.003	0.0026	0.24	691026
rs17170281	7:33569809	0	BBS9	T/C	0.08402	0.0039	0.0033	0.24	666055
rs1492652	8:96306378	3	C8orf37	T/C	0.543	-0.0021	0.0017	0.24	692410
rs4733946	8:38319349	0	FGFR1	T/G	0.09097	-0.0036	0.0031	0.24	690241
rs6026593	20:57479133	0	GNAS	A/G	0.8912	-0.0034	0.0029	0.24	675591
rs7121	20:57478807	0	GNAS	T/C	0.478	0.0022	0.0018	0.24	663342
rs11145974	9:139316744	1	INPP5E	T/C	0.2519	-0.0023	0.002	0.24	690868
rs10873634	15:23880551	0	MAGEL2	A/G	0.2664	0.0024	0.002	0.24	682913
rs4925092	17:17568931	12	RAI1	T/C	0.5159	0.002	0.0017	0.24	690209
rs11801170	1:243563644	1	SDCCAG8	T/C	0.98801	-0.0097	0.0083	0.24	649018
rs17060473	6:100835307	0	SIM1	A/T	0.97539	-0.0067	0.0058	0.24	624345
rs719572	14:89375600	5	TTC8	T/C	0.498	-0.002	0.0017	0.24	689672
rs6538734	12:76723306	0	BBS10	A/G	0.01415	-0.0085	0.0075	0.25	641326
rs12619026	2:170354790	0	BBS5	A/G	0.8212	-0.0026	0.0022	0.25	690006
rs4778065	15:93543531	13	CHD2	A/T	0.7198	0.0022	0.0019	0.25	690466
rs2259657	9:140483076	1	EHMT1	A/G	0.5409	-0.0021	0.0018	0.25	678586
rs8178340	17:56328251	1	MKS1	A/T	0.07215	-0.0039	0.0034	0.25	679254
rs11810833	1:243617188	1	SDCCAG8	T/G	0.8461	0.0027	0.0024	0.25	692540
rs11195166	10:112285813	0	SMC3	T/G	0.102	0.0033	0.0029	0.25	687945
rs9610885	22:38353946	0	SOX10	T/C	0.05548	0.0047	0.0041	0.25	665704
rs12054579	4:123639347	7	BBS12	T/C	0.91335	-0.0036	0.0032	0.26	692610
rs11637927	15:72978531	0	BBS4	A/C	0.07659	0.0038	0.0034	0.26	667598
rs2253680	2:170403030	5	BBS5	T/C	0.4241	0.0019	0.0017	0.26	692589
rs17452087	4:122732843	0	BBS7	A/G	0.01286	0.0098	0.0087	0.26	616298
rs17810645	22:37222236	1	IFT27	A/C	0.1547	0.0027	0.0024	0.26	685701
rs11145917	9:139302200	0	INPP5E	T/C	0.3536	-0.0021	0.0019	0.26	677883
rs3812590	9:139335940	16	INPP5E	T/C	0.8617	-0.0027	0.0024	0.26	692452
rs7218964	17:56233034	3	MKS1	A/C	0.1841	-0.0023	0.002	0.26	795559
rs9972595	15:23974642	1	NDN	A/G	0.02467	-0.0062	0.0055	0.26	661288
rs12438596	15:24884007	0	NPAP1	T/C	0.2301	-0.0024	0.0021	0.26	680440
rs17785583	20:5242831	1	PROKR2	A/G	0.8696	0.0029	0.0026	0.26	679312
rs4925057	17:17545254	0	RAI1	C/G	0.1068	-0.0032	0.0028	0.26	690226
rs12325384	16:56454111	4	BBS2	T/G	0.96241	-0.0049	0.0045	0.27	691837
rs4637716	7:33510163	2	BBS9	T/G	0.5335	-0.0019	0.0017	0.27	690788
rs6957961	7:33666295	0	BBS9	A/G	0.04315	0.0049	0.0044	0.27	775755
rs12907990	15:93615924	1	CHD2	A/T	0.425	-0.002	0.0018	0.27	655789
rs6500552	16:3759393	0	CREBBP	T/C	0.7466	-0.0023	0.002	0.27	675615
rs7497530	15:23766426	0	MKRN3	A/G	0.3796	-0.002	0.0018	0.27	685756
rs11140714	9:87266700	1	NTRK2	A/G	0.7891	0.0023	0.0021	0.27	689947
rs17721927	3:71851477	1	PROK2	T/C	0.2852	0.0021	0.0019	0.27	676030
rs10081574	8:117841222	13	RAD21	T/C	0.8154	0.0024	0.0022	0.27	692440
rs803932	9:119458020	4	TRIM32	T/C	0.6726	-0.0021	0.0019	0.27	692562
rs13102440	4:123664919	17	BBS12	A/G	0.7676	-0.0022	0.002	0.28	692564
rs12650359	4:122714623	0	BBS7	A/G	0.9869	0.0128	0.0119	0.28	618393
rs4499993	7:33605613	1	BBS9	T/C	0.6843	-0.002	0.0019	0.28	684696
rs738521	22:37124298	2	IFT27	T/C	0.04613	-0.0043	0.004	0.28	678633
rs952287	3:45899615	1	LZTFL1	A/G	0.7183	0.0021	0.0019	0.28	690121
rs7495455	15:23853206	6	MAGEL2	T/C	0.1268	-0.0028	0.0026	0.28	692560
rs1344092	20:10333423	0	MKKS	A/G	0.3599	-0.002	0.0018	0.28	680362
rs1587323	15:25159133	1	SNURF	A/C	0.8478	0.0027	0.0025	0.28	655715
rs743231	14:89358280	1	TTC8	T/G	0.1121	-0.003	0.0028	0.28	690576
rs16935778	11:8120601	1	TUB	T/C	0.8782	0.0029	0.0027	0.28	672229
rs13253939	8:100802706	0	VPS13B	A/G	0.853	-0.0027	0.0025	0.28	675354
rs16856972	2:170336797	5	BBS5	A/G	0.07361	0.0033	0.0032	0.29	692568
rs10278847	7:33684227	0	BBS9	C/G	0.7701	0.0023	0.0021	0.29	664448
rs13267270	8:96241119	1	C8orf37	T/G	0.04069	0.0049	0.0047	0.29	673200
rs1545189	15:93560331	0	CHD2	T/G	0.2348	0.0023	0.0021	0.29	664813
rs16887405	8:38359658	1	FGFR1	T/C	0.685	0.002	0.0019	0.29	690002
rs11699704	20:57443244	2	GNAS	T/C	0.8715	-0.0028	0.0026	0.29	682374
rs234623	20:57488964	0	GNAS	A/G	0.505	0.0018	0.0017	0.29	682311
rs6441929	3:45924791	2	LZTFL1	A/G	0.8376	0.0025	0.0023	0.29	690048
rs6039886	20:10352334	1	MKKS	T/C	0.7389	-0.0021	0.002	0.29	692083
rs2109248	17:56249512	3	MKS1	A/G	0.6772	0.002	0.0019	0.29	691754
rs8178307	17:56323678	5	MKS1	T/C	0.2221	-0.0022	0.0021	0.29	691956
rs9653638	20:5234245	0	PROKR2	A/G	0.2381	-0.0023	0.0022	0.29	534335
rs11755345	6:100796960	0	SIM1	A/C	0.97638	-0.0061	0.0058	0.29	658027
rs756118	9:119487330	2	TRIM32	T/C	0.6094	-0.0019	0.0018	0.29	692557
rs13273111	8:100560955	0	VPS13B	T/G	0.98766	-0.0099	0.0093	0.29	590157
rs666636	16:56601720	1	BBS2	A/G	0.02526	0.0058	0.0056	0.3	691213
rs17670281	8:96329517	2	C8orf37	A/G	0.8638	0.0026	0.0025	0.3	691826
rs11104726	12:88446029	1	CEP290	A/G	0.8887	-0.0029	0.0027	0.3	676338
rs12595801	15:93520876	0	CHD2	A/C	0.2786	-0.002	0.0019	0.3	672742
rs4778080	15:93603525	3	CHD2	T/G	0.6152	0.0018	0.0018	0.3	690616
rs749611	15:93613230	0	CHD2	C/G	0.92768	0.0036	0.0035	0.3	650372
rs1717839	15:23973973	0	NDN	T/C	0.5591	-0.0019	0.0018	0.3	642997
rs12902137	15:24924663	1	NPAP1	T/C	0.7261	-0.002	0.0019	0.3	688814
rs17347861	9:87248533	0	NTRK2	A/T	0.9772	0.0052	0.0051	0.3	588294
rs13044359	20:5276448	14	PROKR2	A/G	0.7593	-0.0021	0.002	0.3	691970
rs12420107	11:7997397	0	TUB	A/G	0.7974	-0.0023	0.0022	0.3	665099
rs2280730	11:8037138	1	TUB	T/C	0.3357	-0.0019	0.0019	0.3	675346
rs2719878	15:25590510	0	UBE3A	A/G	0.95907	-0.0048	0.0046	0.3	623018
rs2739818	15:25551253	0	UBE3A	T/C	0.2242	0.0022	0.0021	0.3	678489
rs8023267	15:25711127	7	UBE3A	T/C	0.0494	-0.0042	0.0041	0.3	688485
rs6710763	2:64068788	9	WDPCP	T/G	0.7923	-0.0022	0.0021	0.3	733684
rs17006039	4:123605743	0	BBS12	C/G	0.8562	0.0025	0.0024	0.31	680659
rs16968331	16:56505773	0	BBS2	A/C	0.92101	-0.0032	0.0032	0.31	691693
rs7794579	7:33568222	1	BBS9	T/C	0.8904	0.0028	0.0027	0.31	689567
rs7844863	8:96208009	0	C8orf37	T/G	0.94797	0.0041	0.004	0.31	643967
rs1044778	15:93570786	0	CHD2	C/G	0.2895	0.002	0.002	0.31	672904
rs4777760	15:93602317	0	CHD2	A/G	0.4651	0.0018	0.0018	0.31	671848
rs7865443	9:140798459	0	EHMT1	A/G	0.2232	0.0021	0.002	0.31	778179
rs13042263	20:57394925	1	GNAS	T/C	0.3474	0.0019	0.0018	0.31	689667
rs1722794	15:23949274	1	NDN	T/C	0.06507	0.0038	0.0038	0.31	615579
rs11652656	17:17691835	10	RAI1	C/G	0.93814	0.0035	0.0034	0.31	791429
rs884587	10:112374302	0	SMC3	T/C	0.2938	-0.002	0.0019	0.31	679285
rs4758038	11:8022014	3	TUB	T/C	0.4756	0.0017	0.0017	0.31	692495
rs11781989	8:100854224	0	VPS13B	A/G	0.04286	-0.0048	0.0047	0.31	632629
rs10885056	10:112610839	0	BBIP1	A/G	0.2467	-0.002	0.002	0.32	680339
rs11902340	2:170359113	0	BBS5	A/G	0.8783	-0.0027	0.0027	0.32	691811
rs6736056	2:170336811	0	BBS5	A/G	0.2368	0.002	0.002	0.32	689155
rs1009355	7:33218763	4	BBS9	T/C	0.4921	-0.0017	0.0017	0.32	692567
rs2700697	7:33669892	7	BBS9	T/C	0.2475	0.002	0.002	0.32	687881
rs12155945	8:96214292	0	C8orf37	T/G	0.1334	-0.0024	0.0024	0.32	788828
rs2272463	15:93481007	10	CHD2	A/G	0.92218	-0.0032	0.0032	0.32	692372
rs11076787	16:3852776	1	CREBBP	T/C	0.2104	0.002	0.0021	0.32	748841
rs10958700	8:38310910	23	FGFR1	T/G	0.7653	0.0019	0.002	0.32	774093
rs1994491	3:45960420	10	LZTFL1	C/G	0.1042	-0.0028	0.0028	0.32	692060
rs6032881	20:10432766	30	MKKS	A/G	0.5471	0.0017	0.0017	0.32	684186
rs2497113	6:84767152	4	MRAP2	A/G	0.2248	0.0021	0.0021	0.32	691579
rs10119127	9:87445121	0	NTRK2	T/C	0.02608	-0.0045	0.0046	0.32	558230
rs2064245	6:57117624	1	RAB23	C/G	0.5461	-0.0017	0.0017	0.32	687873
rs11195254	10:112414347	0	SMC3	T/G	0.45	0.0018	0.0018	0.32	675191
rs8033766	15:25259267	4	SNURF	A/G	0.4581	0.0017	0.0017	0.32	690065
rs12280677	11:8005405	0	TUB	A/G	0.0646	-0.0035	0.0035	0.32	673367
rs11984855	8:100583772	59	VPS13B	T/C	0.95574	-0.0042	0.0042	0.32	692025
rs17552490	2:63663903	0	WDPCP	T/C	0.03151	-0.0051	0.0051	0.32	683732
rs2514572	8:96235451	0	C8orf37	T/C	0.92218	-0.0029	0.003	0.33	786056
rs4777756	15:93579169	0	CHD2	C/G	0.05326	0.0039	0.004	0.33	654048
rs9842595	3:45922691	0	LZTFL1	T/G	0.0825	-0.0031	0.0031	0.33	690233
rs10873623	15:23833737	1	MKRN3	T/C	0.97281	-0.0054	0.0055	0.33	648888
rs7223891	17:56239624	0	MKS1	T/C	0.08489	0.0032	0.0033	0.33	679302
rs7644813	3:71883981	0	PROK2	C/G	0.1007	-0.0028	0.0029	0.33	676637
rs1058304	1:243664857	1	SDCCAG8	T/C	0.2612	-0.0019	0.0019	0.33	689700
rs670353	15:25198974	0	SNURF	T/G	0.96942	0.0053	0.0054	0.33	669150
rs7008093	8:100254919	0	VPS13B	T/C	0.9527	-0.0041	0.0042	0.33	674008
rs13897	11:66331169	0	BBS1	T/C	0.07858	-0.0032	0.0033	0.34	691536
rs11643815	16:56602798	0	BBS2	A/G	0.141	-0.0024	0.0025	0.34	687563
rs176060	16:56583581	2	BBS2	A/T	0.93078	0.0031	0.0032	0.34	773427
rs2468251	12:88480926	26	CEP290	T/C	0.07402	0.0032	0.0033	0.34	692576
rs2956724	8:38292266	3	FGFR1	A/C	0.08004	-0.003	0.0032	0.34	691381
rs2206161	20:10334969	3	MKKS	T/C	0.3666	0.0017	0.0018	0.34	690738
rs2240815	17:56272390	0	MKS1	A/G	0.5555	0.0017	0.0018	0.34	674753
rs17664152	8:117817472	0	RAD21	T/G	0.08261	0.0029	0.0031	0.34	664905
rs11988133	8:100495534	42	VPS13B	T/C	0.04397	0.004	0.0042	0.34	692031
rs7837596	8:100924271	1	VPS13B	A/G	0.1094	0.0027	0.0028	0.34	679337
rs10224087	7:33685177	6	BBS9	C/G	0.08571	-0.0026	0.0028	0.35	793286
rs10266903	7:33675799	4	BBS9	A/G	0.7746	-0.0019	0.0021	0.35	686633
rs2439628	8:96254155	0	C8orf37	T/C	0.91417	-0.0029	0.0031	0.35	687566
rs8032603	15:93505649	11	CHD2	T/G	0.91832	-0.0029	0.0031	0.35	692180
rs2972781	5:42716326	0	GHR	T/C	0.9772	-0.0062	0.0066	0.35	624429
rs4130113	5:42514651	0	GHR	A/G	0.4181	0.0017	0.0018	0.35	682434
rs2145288	20:57444209	0	GNAS	A/C	0.7456	0.0019	0.0021	0.35	677316
rs875890	3:45945287	0	LZTFL1	A/T	0.259	0.0019	0.002	0.35	686969
rs12595799	15:24908795	2	NPAP1	A/G	0.90663	-0.0028	0.003	0.35	691459
rs1387924	9:87632993	3	NTRK2	T/G	0.1681	0.0021	0.0023	0.35	691467
rs13192262	6:100827083	14	SIM1	T/C	0.8739	-0.0024	0.0026	0.35	692575
rs2841296	6:100785588	0	SIM1	T/C	0.8772	-0.0024	0.0026	0.35	690648
rs714378	6:100872787	0	SIM1	T/C	0.2042	0.002	0.0022	0.35	681325
rs17827738	10:112406021	1	SMC3	A/G	0.311	-0.0018	0.0019	0.35	676984
rs610736	15:25184117	2	SNURF	A/G	0.1333	0.0024	0.0026	0.35	689417
rs13302089	9:119413115	2	TRIM32	T/C	0.2338	0.0019	0.002	0.35	691952
rs16933879	9:119512923	0	TRIM32	A/G	0.1247	-0.0025	0.0026	0.35	688514
rs12588535	14:89248244	2	TTC8	C/G	0.7246	0.0018	0.002	0.35	691590
rs4758291	11:8125294	0	TUB	T/G	0.92978	0.0032	0.0035	0.35	687580
rs10504988	8:100387202	40	VPS13B	T/C	0.04391	0.0039	0.0042	0.35	692068
rs6985574	8:100638489	8	VPS13B	T/C	0.1611	0.0021	0.0022	0.35	794755
rs9987273	8:100386353	1	VPS13B	A/T	0.3976	-0.0017	0.0018	0.35	686113
rs435651	16:56573297	1	BBS2	T/G	0.1973	-0.0021	0.0023	0.36	678790
rs12374818	7:33694108	1	BBS9	A/G	0.05771	0.0039	0.0042	0.36	684079
rs7780194	7:33208032	27	BBS9	A/G	0.1635	0.0021	0.0023	0.36	791322
rs7793096	7:33282577	5	BBS9	A/G	0.529	-0.0016	0.0017	0.36	692594
rs7862101	9:140756825	0	EHMT1	T/C	0.8562	0.0023	0.0025	0.36	643221
rs4146624	5:42690634	0	GHR	A/G	0.02491	-0.0056	0.0061	0.36	654796
rs234628	20:57485611	3	GNAS	T/C	0.4557	-0.0016	0.0018	0.36	682953
rs12484703	22:37140797	0	IFT27	A/G	0.8654	0.0023	0.0026	0.36	690880
rs13078739	3:46007488	9	LZTFL1	A/G	0.1063	-0.0026	0.0028	0.36	692484
rs7209537	17:56328214	5	MKS1	T/C	0.3881	-0.0016	0.0018	0.36	692230
rs10118392	9:87680401	0	NTRK2	T/C	0.96293	-0.0043	0.0047	0.36	587111
rs17334598	9:87678043	0	NTRK2	A/G	0.96936	-0.0043	0.0048	0.36	662950
rs2586566	9:87570912	0	NTRK2	A/G	0.779	0.002	0.0021	0.36	680211
rs9871833	3:71876449	1	PROK2	A/G	0.6676	-0.0017	0.0019	0.36	682315
rs2326614	20:5247393	1	PROKR2	A/G	0.6528	-0.0017	0.0018	0.36	688578
rs1050838	8:117864217	5	RAD21	A/G	0.8357	0.0021	0.0023	0.36	692582
rs10787255	10:112357518	13	SMC3	A/T	0.151	-0.0023	0.0024	0.36	691839
rs2647364	15:25172192	0	SNURF	T/C	0.4544	0.0017	0.0019	0.36	542477
rs3794018	11:8097434	0	TUB	T/C	0.5971	0.0015	0.0017	0.36	793750
rs2340625	15:25639185	0	UBE3A	C/G	0.7184	-0.0018	0.002	0.36	682730
rs10464840	8:100892284	0	VPS13B	T/C	0.95714	0.0043	0.0047	0.36	647347
rs13386979	2:63579964	2	WDPCP	T/C	0.8649	-0.0023	0.0025	0.36	691570
rs4671463	2:63412605	3	WDPCP	T/C	0.7234	-0.0018	0.0019	0.36	690631
rs17128195	10:112717846	1	BBIP1	A/G	0.97047	-0.0045	0.0051	0.37	660411
rs12328261	2:170332394	0	BBS5	T/C	0.8157	0.002	0.0023	0.37	688676
rs7787381	7:33653209	29	BBS9	C/G	0.7786	-0.0018	0.0021	0.37	691902
rs2283487	16:3969886	5	CREBBP	A/G	0.338	0.0016	0.0018	0.37	686486
rs4778557	15:23782840	14	MKRN3	C/G	0.5286	0.0015	0.0017	0.37	779815
rs1717837	15:23978955	1	NDN	A/G	0.95609	0.0038	0.0042	0.37	667857
rs223296	6:57093656	3	RAB23	T/C	0.93861	0.0032	0.0035	0.37	691547
rs409025	6:57098973	0	RAB23	T/G	0.6465	-0.0016	0.0018	0.37	688780
rs10087312	8:117815078	0	RAD21	A/G	0.95668	0.0039	0.0044	0.37	679536
rs7008629	8:100447418	42	VPS13B	A/T	0.95615	-0.0038	0.0042	0.37	692036
rs4917589	10:112612802	0	BBIP1	A/G	0.1681	-0.002	0.0023	0.38	686576
rs610293	11:66310380	0	BBS1	T/C	0.3114	-0.0016	0.0019	0.38	688705
rs2700698	7:33598488	7	BBS9	A/C	0.565	0.0015	0.0017	0.38	691473
rs7778657	7:33307831	28	BBS9	A/G	0.8286	-0.002	0.0023	0.38	692599
rs7815255	8:96275303	0	C8orf37	A/G	0.5815	0.0015	0.0017	0.38	690772
rs2119010	15:93555717	12	CHD2	A/G	0.7445	0.0017	0.002	0.38	692022
rs2008344	16:3741562	0	CREBBP	A/G	0.09799	0.0027	0.003	0.38	673162
rs6000401	22:37149336	0	IFT27	T/C	0.01561	-0.0053	0.0061	0.38	626122
rs4242709	9:139337522	0	INPP5E	A/G	0.8711	0.0024	0.0028	0.38	572666
rs11161128	15:24944608	0	NPAP1	A/G	0.8927	-0.0025	0.0029	0.38	675579
rs984430	9:87582827	0	NTRK2	T/C	0.1776	-0.0021	0.0024	0.38	659159
rs6085054	20:5245152	0	PROKR2	A/G	0.3932	-0.0016	0.0018	0.38	686906
rs223291	6:57107323	0	RAB23	A/G	0.6325	-0.0016	0.0019	0.38	673636
rs17811822	8:117838833	0	RAD21	T/C	0.02116	0.0052	0.0059	0.38	679143
rs12120901	1:243570530	1	SDCCAG8	A/G	0.95948	0.004	0.0045	0.38	653889
rs11607445	11:8010242	6	TUB	C/G	0.8877	-0.0024	0.0027	0.38	692097
rs7634548	3:97453438	0	ARL6	T/C	0.2049	-0.0018	0.0021	0.39	690650
rs7973584	12:76698443	7	BBS10	T/C	0.5871	-0.0015	0.0017	0.39	739030
rs10226731	7:33691118	8	BBS9	T/C	0.08402	-0.0026	0.003	0.39	690740
rs13221959	7:33568658	0	BBS9	T/C	0.98854	-0.0082	0.0095	0.39	722335
rs6966995	7:33525304	1	BBS9	A/G	0.2047	0.002	0.0023	0.39	670458
rs7459448	8:96306135	2	C8orf37	T/C	0.07916	0.0028	0.0033	0.39	690811
rs2940930	5:42405511	1	GHR	A/G	0.3728	0.0016	0.0018	0.39	689074
rs3774641	3:45937833	1	LZTFL1	T/G	0.1811	-0.002	0.0023	0.39	686921
rs7625017	3:45853062	0	LZTFL1	C/G	0.8699	0.0023	0.0026	0.39	681237
rs6039930	20:10414643	0	MKKS	A/G	0.04391	-0.0039	0.0046	0.39	639159
rs6076798	20:5234887	0	PROKR2	A/G	0.6989	0.0017	0.002	0.39	550641
rs806386	6:57077814	0	RAB23	A/T	0.06174	-0.0032	0.0037	0.39	670318
rs1374300	8:117829950	0	RAD21	T/C	0.97644	-0.0045	0.0053	0.39	597849
rs4350299	10:112380329	0	SMC3	T/C	0.5116	-0.0014	0.0017	0.39	789232
rs803927	9:119403611	0	TRIM32	A/G	0.94873	-0.0034	0.004	0.39	687755
rs1406093	11:8129204	0	TUB	A/G	0.08022	-0.0027	0.0032	0.39	691689
rs7926428	11:8099117	0	TUB	T/C	0.1279	-0.0023	0.0026	0.39	658762
rs17516673	5:132196711	6	AFF4	T/C	0.14	-0.0021	0.0025	0.4	692464
rs17477108	7:33351945	0	BBS9	T/C	0.1221	-0.0023	0.0028	0.4	671318
rs4777740	15:93389910	5	CHD2	C/G	0.3055	0.0016	0.0019	0.4	692095
rs130021	16:3832471	0	CREBBP	A/G	0.6488	0.0015	0.0018	0.4	688826
rs11699363	20:57386328	2	GNAS	C/G	0.1309	0.0021	0.0025	0.4	688891
rs936939	3:45986623	3	LZTFL1	A/C	0.2014	0.0018	0.0021	0.4	692604
rs2289656	9:87563562	0	NTRK2	A/G	0.1905	0.0019	0.0023	0.4	680372
rs1343839	3:71839402	0	PROK2	A/G	0.09173	-0.0026	0.0031	0.4	663794
rs9829261	3:71879281	0	PROK2	A/G	0.4187	-0.0015	0.0018	0.4	677974
rs941449	17:17649831	2	RAI1	T/C	0.8923	0.0024	0.0029	0.4	688898
rs12275353	11:8010130	0	TUB	T/C	0.90727	0.0026	0.003	0.4	690853
rs803218	5:132216264	4	AFF4	T/C	0.6995	0.0016	0.0019	0.41	692179
rs176061	16:56585493	1	BBS2	A/C	0.96229	0.004	0.0048	0.41	676142
rs2598386	7:33643418	17	BBS9	T/C	0.7549	-0.0017	0.002	0.41	691491
rs7809230	7:33667673	1	BBS9	A/G	0.1155	0.0022	0.0027	0.41	688775
rs876260	8:96242972	5	C8orf37	A/T	0.5641	-0.0014	0.0017	0.41	687504
rs12441831	15:93601846	0	CHD2	C/G	0.3696	0.0015	0.0019	0.41	659998
rs4078927	15:93579496	0	CHD2	T/C	0.08606	0.0028	0.0033	0.41	652538
rs6131083	20:10351452	2	MKKS	T/G	0.93972	0.0031	0.0038	0.41	684148
rs12602498	17:56273208	0	MKS1	A/G	0.6797	0.0015	0.0019	0.41	692119
rs6559838	9:87553563	1	NTRK2	T/C	0.216	-0.0017	0.0021	0.41	689795
rs6053233	20:5242559	0	PROKR2	A/C	0.2535	-0.0017	0.002	0.41	678190
rs1348795	8:117903341	4	RAD21	T/C	0.5882	-0.0014	0.0017	0.41	692356
rs2732032	15:25243252	11	SNURF	A/T	0.92891	-0.0026	0.0032	0.41	794336
rs10983304	9:119448979	0	TRIM32	T/C	0.03315	0.0041	0.0049	0.41	676152
rs10983331	9:119492366	0	TRIM32	T/C	0.04952	0.0032	0.004	0.41	679215
rs13286082	9:119508354	0	TRIM32	A/C	0.7932	-0.0018	0.0022	0.41	691307
rs12365005	11:8024022	0	TUB	T/C	0.97884	0.0051	0.0062	0.41	664050
rs1419926	7:33476376	2	BBS9	A/G	0.1362	0.002	0.0025	0.42	689586
rs1866926	8:96208087	1	C8orf37	A/G	0.3552	0.0015	0.0019	0.42	652793
rs1534782	15:93589177	0	CHD2	A/C	0.5453	-0.0015	0.0019	0.42	567712
rs6922368	6:84795619	6	MRAP2	A/C	0.1373	-0.002	0.0025	0.42	762286
rs12737589	1:243384008	0	SDCCAG8	T/C	0.05537	-0.0033	0.0041	0.42	619006
rs4538187	2:64103741	12	WDPCP	A/G	0.8133	-0.0018	0.0022	0.42	692568
rs11761619	7:33549392	0	BBS9	A/G	0.90733	0.0023	0.003	0.43	680443
rs7390989	9:140738306	0	EHMT1	A/G	0.6338	-0.0014	0.0018	0.43	672285
rs2288696	8:38286225	0	FGFR1	A/G	0.2214	-0.0016	0.0021	0.43	680845
rs12439530	15:24973115	10	NPAP1	T/C	0.3402	0.0014	0.0018	0.43	692581
rs6038106	20:5247593	9	PROKR2	T/G	0.1458	0.0019	0.0024	0.43	692419
rs223287	6:57104266	0	RAB23	T/C	0.92347	0.0026	0.0033	0.43	684170
rs4758270	11:8042616	1	TUB	A/G	0.6572	-0.0015	0.0018	0.43	690377
rs803221	5:132210436	3	AFF4	T/C	0.2575	0.0014	0.0018	0.44	795443
rs3754922	2:170364235	3	BBS5	T/G	0.94072	0.0029	0.0038	0.44	687905
rs12672858	7:33669954	2	BBS9	A/C	0.8783	-0.002	0.0026	0.44	688327
rs2700675	7:33649714	28	BBS9	A/G	0.7803	-0.0016	0.0021	0.44	692293
rs991592	5:42383864	8	GHR	A/C	0.3759	-0.0014	0.0018	0.44	691658
rs6039899	20:10365407	5	MKKS	A/G	0.2256	0.0016	0.0021	0.44	690230
rs7538011	1:243703344	1	SDCCAG8	A/G	0.8628	-0.0018	0.0024	0.44	690502
rs6570772	6:100936361	4	SIM1	T/C	0.1829	-0.0017	0.0022	0.44	692365
rs13260338	8:100350744	2	VPS13B	T/C	0.8989	-0.0023	0.0029	0.44	675836
rs13271808	8:100825586	0	VPS13B	A/C	0.08711	0.0026	0.0034	0.44	660529
rs17832261	10:112662114	0	BBIP1	C/G	0.1383	0.002	0.0026	0.45	579074
rs4604335	7:33389351	2	BBS9	A/G	0.431	-0.0013	0.0017	0.45	691451
rs4720108	7:33195732	4	BBS9	A/G	0.243	0.0015	0.002	0.45	692362
rs7797739	7:33354325	1	BBS9	A/G	0.08635	-0.0023	0.0031	0.45	690077
rs17669929	8:96308144	1	C8orf37	T/C	0.3329	-0.0014	0.0018	0.45	687721
rs4778081	15:93603608	3	CHD2	A/C	0.4412	-0.0013	0.0017	0.45	692443
rs2284022	22:37201891	5	IFT27	T/C	0.567	-0.0013	0.0018	0.45	683771
rs649067	20:10461575	0	MKKS	T/C	0.753	0.0016	0.0021	0.45	680536
rs12520324	5:36833002	14	NIPBL	T/C	0.8946	-0.0021	0.0028	0.45	692474
rs13270072	8:100360137	1	VPS13B	T/C	0.6636	-0.0014	0.0019	0.45	691587
rs1449788	8:100768514	0	VPS13B	T/C	0.06618	0.0025	0.0034	0.45	686214
rs17616913	2:63606001	0	WDPCP	T/C	0.04853	-0.0031	0.004	0.45	688462
rs17008991	2:73610116	0	ALMS1	A/G	0.0901	0.0023	0.0031	0.46	655264
rs12701304	7:33598427	2	BBS9	A/G	0.03713	0.0035	0.0047	0.46	679275
rs12148826	15:93419892	0	CHD2	T/C	0.7851	0.0016	0.0022	0.46	675010
rs13279569	8:38341616	1	FGFR1	A/G	0.06975	-0.0025	0.0034	0.46	677936
rs11675428	2:27642734	0	IFT172	A/C	0.824	-0.0016	0.0021	0.46	791370
rs10870165	9:139316601	2	INPP5E	T/C	0.4675	0.0013	0.0017	0.46	692290
rs8178329	17:56326521	2	MKS1	C/G	0.08273	-0.0023	0.0031	0.46	683263
rs11654526	17:17617309	0	RAI1	T/C	0.1637	-0.0017	0.0023	0.46	688764
rs8038343	15:25719441	0	UBE3A	T/C	0.1591	-0.0017	0.0023	0.46	689521
rs11997495	8:100214268	30	VPS13B	A/C	0.04519	0.0029	0.0039	0.46	794674
rs1050719	7:33644941	13	BBS9	T/C	0.7562	-0.0015	0.002	0.47	692184
rs13235992	7:33593997	0	BBS9	A/T	0.96971	-0.0039	0.0054	0.47	672224
rs130003	16:3828172	0	CREBBP	A/G	0.97474	-0.0046	0.0063	0.47	549426
rs7730819	5:42694579	4	GHR	A/C	0.97533	0.0044	0.006	0.47	666720
rs12639224	3:45916222	0	LZTFL1	T/C	0.2495	0.0014	0.002	0.47	681102
rs2423491	20:10334090	3	MKKS	A/G	0.6728	-0.0014	0.0019	0.47	692362
rs2900	15:23817721	0	MKRN3	A/G	0.1615	-0.0018	0.0024	0.47	680278
rs10865660	3:71830019	0	PROK2	A/G	0.8927	-0.0021	0.0029	0.47	660071
rs1013147	6:57124881	3	RAB23	T/C	0.6514	-0.0013	0.0018	0.47	692570
rs2647365	15:25172150	0	SNURF	C/G	0.9696	0.0048	0.0066	0.47	509648
rs11041699	11:8005470	0	TUB	A/G	0.1195	-0.002	0.0027	0.47	692299
rs4445877	15:25595812	0	UBE3A	T/C	0.3012	-0.0014	0.0019	0.47	687174
rs10113197	8:100069751	59	VPS13B	A/G	0.7906	-0.0015	0.0021	0.47	692609
rs2442756	8:100829138	3	VPS13B	A/C	0.6382	-0.0013	0.0018	0.47	692237
rs17028099	2:63918055	1	WDPCP	A/G	0.95866	0.0032	0.0044	0.47	773801
rs699300	3:97566573	0	ARL6	A/G	0.91043	-0.0021	0.0029	0.48	686905
rs7923004	10:112678091	17	BBIP1	A/C	0.95258	0.0029	0.0041	0.48	692364
rs12671333	7:33193481	2	BBS9	T/G	0.6718	0.0013	0.0018	0.48	691957
rs12905450	15:93559335	0	CHD2	T/C	0.03572	0.0035	0.0049	0.48	557300
rs3822471	5:36985303	13	NIPBL	A/G	0.8868	-0.0019	0.0027	0.48	692598
rs1624327	9:87429290	2	NTRK2	A/G	0.281	-0.0014	0.0019	0.48	691768
rs2732050	15:25288485	0	SNURF	T/C	0.5422	-0.0012	0.0018	0.48	678410
rs3105184	8:100416302	78	VPS13B	T/G	0.2092	0.0015	0.0021	0.48	692603
rs2511225	11:66248431	1	BBS1	A/C	0.6522	-0.0012	0.0018	0.49	692047
rs7349274	2:170386294	5	BBS5	A/G	0.08442	0.0021	0.0031	0.49	692478
rs1020519	7:33603563	2	BBS9	A/G	0.1821	-0.0015	0.0022	0.49	692506
rs12537512	7:33307431	3	BBS9	A/G	0.7673	0.0014	0.0021	0.49	689937
rs16879168	7:33569145	0	BBS9	T/C	0.04964	0.003	0.0043	0.49	662285
rs2392241	7:33543550	3	BBS9	A/G	0.7171	0.0013	0.0019	0.49	692596
rs2700683	7:33632045	5	BBS9	T/C	0.8674	-0.0017	0.0025	0.49	692089
rs730820	8:96230428	2	C8orf37	A/G	0.6603	-0.0013	0.0018	0.49	692557
rs16947406	15:93603451	2	CHD2	T/G	0.1903	-0.0016	0.0023	0.49	671192
rs17648415	15:93460991	0	CHD2	A/G	0.777	0.0014	0.0021	0.49	676172
rs7267516	20:57375450	1	GNAS	T/C	0.5041	0.0012	0.0017	0.49	683778
rs3124994	9:139295282	0	INPP5E	A/G	0.3697	0.0013	0.0018	0.49	682620
rs1488371	3:45938089	4	LZTFL1	T/G	0.6315	-0.0012	0.0018	0.49	683634
rs6074133	20:10397154	0	MKKS	T/C	0.55	-0.0012	0.0017	0.49	684152
rs7171487	15:24892938	9	NPAP1	T/C	0.602	0.0012	0.0018	0.49	692561
rs7020204	9:87426187	3	NTRK2	T/C	0.0784	0.0022	0.0032	0.49	688658
rs4677049	3:71851805	1	PROK2	T/C	0.3369	-0.0013	0.0019	0.49	672739
rs9873991	3:71850562	2	PROK2	A/C	0.1373	-0.0018	0.0026	0.49	678669
rs1006656	17:17682484	0	RAI1	A/G	0.8738	0.0017	0.0025	0.49	793361
rs17180589	15:25166847	3	SNURF	A/G	0.79	0.0015	0.0021	0.49	679682
rs4906695	15:25154880	1	SNURF	C/G	0.1706	-0.0016	0.0024	0.49	679430
rs2719881	15:25606727	1	UBE3A	T/G	0.04309	0.003	0.0044	0.49	661342
rs17027650	2:63389998	0	WDPCP	T/C	0.06273	-0.0025	0.0037	0.49	690247
rs9937368	16:56587836	2	BBS2	A/G	0.05069	0.0026	0.0038	0.5	689623
rs10236253	7:33475248	0	BBS9	A/T	0.98433	0.0061	0.009	0.5	644686
rs2439647	8:96233109	0	C8orf37	T/C	0.94639	0.0028	0.0041	0.5	680871
rs9649978	8:96254033	0	C8orf37	T/C	0.719	0.0013	0.0019	0.5	688173
rs11104738	12:88500847	0	CEP290	T/C	0.9527	-0.0027	0.004	0.5	691370
rs4778092	15:93610139	0	CHD2	A/G	0.4388	-0.0012	0.0018	0.5	689845
rs129963	16:3796147	0	CREBBP	T/C	0.4236	0.0012	0.0018	0.5	662230
rs9868455	3:45924211	1	LZTFL1	T/C	0.7705	-0.0014	0.002	0.5	686544
rs8178281	17:56317193	0	MKS1	A/G	0.98433	-0.0048	0.0071	0.5	665959
rs2497160	6:84761718	1	MRAP2	C/G	0.824	-0.0016	0.0023	0.5	690433
rs12903753	15:24903996	4	NPAP1	A/T	0.1555	0.0016	0.0024	0.5	692348
rs2883645	15:24963375	1	NPAP1	T/G	0.2464	0.0013	0.002	0.5	685491
rs13213618	6:57121963	2	RAB23	T/G	0.8299	0.0015	0.0022	0.5	691673
rs223294	6:57112292	0	RAB23	A/G	0.04028	0.0031	0.0046	0.5	660243
rs10983326	9:119487445	2	TRIM32	A/C	0.2552	0.0013	0.002	0.5	689575
rs7948279	11:8115233	0	TUB	T/C	0.08016	0.0021	0.0032	0.5	770625
rs11857412	15:25656279	3	UBE3A	T/C	0.95539	0.0029	0.0043	0.5	691737
rs7496451	15:25718875	0	UBE3A	T/C	0.2313	0.0014	0.0021	0.5	690297
rs13025802	2:63703615	1	WDPCP	A/T	0.96264	0.0031	0.0045	0.5	674388
rs13389715	2:170300617	4	BBS5	A/C	0.07986	0.0021	0.0032	0.51	691536
rs1296720	16:3873642	2	CREBBP	A/C	0.8055	-0.0014	0.0021	0.51	747078
rs4610467	5:42523468	0	GHR	T/C	0.01725	0.0039	0.0059	0.51	608410
rs7169369	15:23877411	0	MAGEL2	A/G	0.447	-0.0012	0.0018	0.51	651797
rs764938	8:117813226	0	RAD21	A/G	0.93662	0.0023	0.0035	0.51	680036
rs7814852	8:117848405	3	RAD21	T/C	0.1507	-0.0016	0.0024	0.51	683427
rs9428576	1:243662027	0	SDCCAG8	T/C	0.5719	0.0011	0.0017	0.51	689112
rs397662	6:100895344	1	SIM1	T/C	0.8507	-0.0016	0.0025	0.51	690038
rs11635323	15:25170718	1	SNURF	T/C	0.92657	-0.0024	0.0036	0.51	529950
rs11624334	14:89380959	18	TTC8	T/C	0.2762	0.0012	0.0019	0.51	692599
rs2087070	3:97455560	0	ARL6	A/G	0.2222	0.0013	0.0021	0.52	690902
rs1909750	16:56596407	0	BBS2	T/C	0.3358	0.0011	0.0018	0.52	783650
rs17170286	7:33595651	1	BBS9	T/C	0.91107	0.0019	0.003	0.52	692495
rs4510745	7:33506733	23	BBS9	A/G	0.6833	0.0012	0.0018	0.52	692558
rs1994792	8:96309137	0	C8orf37	T/G	0.6739	-0.0012	0.0019	0.52	678296
rs10867037	9:140536098	1	EHMT1	T/C	0.02672	-0.0034	0.0052	0.52	595852
rs1640499	15:23955968	0	NDN	T/C	0.2021	-0.0015	0.0024	0.52	509041
rs1563102	15:24921771	0	NPAP1	C/G	0.3057	-0.0012	0.0019	0.52	690845
rs10868215	9:87234111	0	NTRK2	T/C	0.6318	-0.0011	0.0018	0.52	692401
rs720133	8:117916281	0	RAD21	T/C	0.7071	0.0012	0.0019	0.52	692502
rs4515770	1:243686913	6	SDCCAG8	T/C	0.7823	-0.0013	0.0021	0.52	690498
rs10092463	8:100812300	2	VPS13B	A/G	0.6804	-0.0012	0.0019	0.52	684411
rs12491333	3:97526324	0	ARL6	A/G	0.90037	-0.0018	0.0029	0.53	689403
rs10170021	2:170295503	0	BBS5	T/C	0.2811	-0.0012	0.0019	0.53	692532
rs10486532	7:33480364	0	BBS9	A/G	0.96837	0.0028	0.0045	0.53	680416
rs16893805	8:96307005	0	C8orf37	A/T	0.8761	0.0016	0.0026	0.53	677239
rs7953323	12:88561356	46	CEP290	A/G	0.94487	-0.0025	0.0039	0.53	691799
rs7847988	9:140798637	0	EHMT1	T/C	0.1622	-0.0015	0.0024	0.53	687848
rs7181128	15:23879149	0	MAGEL2	A/C	0.4638	-0.0011	0.0018	0.53	657291
rs6077783	20:10410431	6	MKKS	A/G	0.4387	0.0011	0.0017	0.53	692589
rs7224829	17:56269613	1	MKS1	T/C	0.97147	-0.0034	0.0055	0.53	675213
rs9881946	3:71872014	1	PROK2	T/C	0.3935	0.0012	0.0018	0.53	675464
rs11784677	8:117823912	0	RAD21	T/C	0.02093	0.0037	0.0059	0.53	597239
rs4590341	7:33613560	0	BBS9	A/C	0.09805	0.0019	0.003	0.54	688836
rs16917453	8:96302648	1	C8orf37	T/G	0.04052	0.003	0.0049	0.54	687221
rs6995298	8:96217634	1	C8orf37	A/G	0.2046	0.0013	0.0022	0.54	678079
rs7824517	8:96226251	0	C8orf37	C/G	0.1246	0.0016	0.0026	0.54	673368
rs17335506	12:88519346	2	CEP290	T/C	0.96726	0.003	0.0049	0.54	678728
rs3025674	16:3762981	1	CREBBP	T/C	0.01117	-0.0054	0.0087	0.54	653091
rs11746403	5:42644931	1	GHR	A/T	0.01146	-0.0054	0.0086	0.54	630475
rs7274653	20:57375632	5	GNAS	A/G	0.187	0.0013	0.0022	0.54	692514
rs6747190	2:27686911	0	IFT172	T/C	0.95907	-0.0024	0.0039	0.54	759572
rs8024130	15:23762842	0	MKRN3	T/G	0.96375	-0.0029	0.0047	0.54	684762
rs17114848	15:25162535	0	SNURF	A/G	0.8761	-0.0018	0.0029	0.54	569055
rs10839972	11:8076174	0	TUB	T/G	0.1978	-0.0014	0.0023	0.54	674178
rs12594469	15:25708779	0	UBE3A	T/C	0.562	-0.0011	0.0018	0.54	681198
rs6468693	8:100851268	1	VPS13B	T/G	0.3937	0.001	0.0017	0.54	784197
rs10056639	5:132342182	10	AFF4	A/G	0.2569	0.0012	0.002	0.55	689980
rs9928602	16:56461328	4	BBS2	C/G	0.8368	-0.0014	0.0024	0.55	692064
rs11687905	2:170337642	1	BBS5	C/G	0.2966	0.0011	0.0019	0.55	689362
rs2683422	2:170393260	3	BBS5	T/C	0.3983	-0.001	0.0018	0.55	689992
rs1419927	7:33457501	19	BBS9	A/G	0.5847	-0.001	0.0017	0.55	691070
rs6957890	7:33592306	6	BBS9	T/C	0.4726	-0.001	0.0017	0.55	692452
rs8049367	16:3980445	6	CREBBP	T/C	0.6118	-0.0011	0.0018	0.55	692106
rs6070664	20:57536127	0	GNAS	T/G	0.02912	-0.0029	0.0048	0.55	618583
rs5995332	22:37109653	0	IFT27	A/C	0.8616	0.0015	0.0025	0.55	691213
rs7495382	15:23824746	1	MKRN3	T/G	0.2018	0.0012	0.002	0.55	754107
rs9359577	6:84695944	0	MRAP2	A/G	0.07256	-0.0021	0.0035	0.55	692095
rs7497278	15:24895389	9	NPAP1	T/C	0.2856	-0.0011	0.0019	0.55	692523
rs1548063	8:117915914	2	RAD21	A/G	0.7233	0.0012	0.0019	0.55	686707
rs3737293	10:112349602	0	SMC3	T/C	0.9216	0.002	0.0033	0.55	676062
rs7950331	11:8023737	1	TUB	T/G	0.8286	-0.0014	0.0023	0.55	691487
rs11986652	8:100284110	35	VPS13B	T/C	0.94609	-0.0023	0.0039	0.55	692062
rs11726196	4:122806228	1	BBS7	A/C	0.3354	0.0011	0.0018	0.56	686935
rs17724206	7:33423761	4	BBS9	A/G	0.2545	-0.0012	0.002	0.56	688384
rs6951439	7:33599903	0	BBS9	A/G	0.4779	-0.001	0.0017	0.56	682982
rs1519479	11:27667531	13	BDNF	T/C	0.4734	-0.001	0.0016	0.56	793719
rs6559243	9:140768119	0	EHMT1	T/C	0.5364	-0.0011	0.0018	0.56	608701
rs9843503	3:45849270	0	LZTFL1	T/G	0.93528	-0.0021	0.0037	0.56	662269
rs6131096	20:10417511	0	MKKS	A/G	0.93715	0.0022	0.0037	0.56	679840
rs12357803	10:112278449	3	SMC3	A/T	0.7139	-0.0011	0.0019	0.56	688648
rs11637528	15:25224341	0	SNURF	T/G	0.04356	0.0025	0.0043	0.56	690836
rs12420464	11:8014777	0	TUB	T/G	0.0832	-0.0019	0.0033	0.56	667006
rs12831412	12:76781215	0	BBS10	A/C	0.7683	-0.0012	0.002	0.57	688435
rs672024	16:56581045	0	BBS2	T/C	0.95329	-0.0022	0.004	0.57	688185
rs4734301	8:96242237	1	C8orf37	A/G	0.6504	-0.001	0.0018	0.57	732258
rs880642	8:96221214	0	C8orf37	T/C	0.1856	0.0013	0.0023	0.57	664787
rs6015380	20:57387854	0	GNAS	A/G	0.3506	0.001	0.0018	0.57	676136
rs6070605	20:57365598	2	GNAS	A/G	0.2969	0.0011	0.0019	0.57	684760
rs737795	22:37117055	5	IFT27	T/C	0.95802	0.0025	0.0044	0.57	691292
rs12910138	15:23850729	2	MAGEL2	A/G	0.09179	0.0017	0.003	0.57	690245
rs10868232	9:87479105	5	NTRK2	A/G	0.8558	0.0014	0.0024	0.57	688461
rs17115033	15:25270430	0	SNURF	A/G	0.06805	-0.0018	0.0032	0.57	764546
rs7175782	15:25151087	0	SNURF	A/G	0.2755	0.0011	0.002	0.57	679227
rs8006331	14:89382657	2	TTC8	T/C	0.02713	-0.0029	0.0051	0.57	679493
rs11195386	10:112710798	0	BBIP1	A/G	0.96697	0.003	0.0055	0.58	677974
rs7690568	4:123666777	11	BBS12	A/C	0.97919	0.0034	0.0061	0.58	748303
rs1419912	7:33508255	0	BBS9	T/C	0.2183	-0.0012	0.0021	0.58	689079
rs11635798	15:93601331	0	CHD2	C/G	0.7513	0.0011	0.002	0.58	753995
rs6100232	20:57382943	0	GNAS	T/C	0.7619	0.0011	0.0021	0.58	681065
rs850822	15:23940850	0	MAGEL2	C/G	0.05239	0.0023	0.0041	0.58	616382
rs2423490	20:10333185	0	MKKS	T/C	0.4802	0.001	0.0018	0.58	678209
rs12441716	15:23785819	1	MKRN3	A/C	0.7261	-0.0011	0.002	0.58	680810
rs6576377	15:24949860	22	NPAP1	A/C	0.96404	-0.0025	0.0046	0.58	688499
rs16889265	8:117936482	11	RAD21	T/C	0.7783	0.0012	0.0021	0.58	688833
rs12591149	15:25176517	0	SNURF	A/G	0.4515	-0.001	0.0018	0.58	653756
rs3752898	11:8116920	0	TUB	C/G	0.1358	0.0014	0.0025	0.58	670883
rs922062	11:8020344	3	TUB	A/G	0.3628	0.001	0.0018	0.58	691737
rs11639518	16:56571452	0	BBS2	T/C	0.03052	-0.0029	0.0054	0.59	570217
rs11030109	11:27696951	0	BDNF	A/G	0.03356	0.003	0.0055	0.59	657627
rs10956944	8:96282926	1	C8orf37	T/C	0.178	-0.0012	0.0022	0.59	691505
rs2471534	12:88494718	5	CEP290	T/C	0.6175	-0.001	0.0018	0.59	692068
rs4076712	9:140786918	0	EHMT1	T/C	0.593	0.001	0.0019	0.59	619696
rs9410117	9:140601916	4	EHMT1	A/G	0.8994	-0.0015	0.0028	0.59	689569
rs9411288	9:139292275	0	INPP5E	T/C	0.02771	0.0032	0.0059	0.59	575224
rs17114595	15:24929290	0	NPAP1	T/C	0.7574	-0.0011	0.0021	0.59	670990
rs1901857	15:24968288	25	NPAP1	T/G	0.96457	-0.0025	0.0046	0.59	688671
rs475335	9:87676586	19	NTRK2	T/G	0.862	-0.0013	0.0025	0.59	690784
rs4837746	9:119422579	7	TRIM32	C/G	0.6758	0.001	0.0018	0.59	691657
rs11601971	11:8085652	1	TUB	T/C	0.1895	0.0012	0.0022	0.59	680671
rs4758295	11:8152080	1	TUB	T/C	0.8808	-0.0014	0.0027	0.59	691934
rs7721953	5:132330053	1	AFF4	T/C	0.7033	-0.001	0.0019	0.6	689699
rs12633362	3:97446309	0	ARL6	T/C	0.08489	-0.0016	0.0031	0.6	687580
rs10501090	11:27787922	0	BDNF	T/C	0.02257	0.003	0.0057	0.6	682259
rs13269474	8:96304429	0	C8orf37	A/G	0.7899	0.0011	0.0021	0.6	676146
rs6070615	20:57378043	0	GNAS	T/G	0.05285	0.0024	0.0045	0.6	659376
rs2271615	3:45837886	0	LZTFL1	C/G	0.1597	0.0013	0.0026	0.6	628205
rs8067912	17:56313904	4	MKS1	T/C	0.9613	-0.0025	0.0048	0.6	686814
rs9812198	3:71879327	0	PROK2	A/G	0.5721	0.0009	0.0018	0.6	678845
rs12601185	17:17541559	0	RAI1	T/G	0.97679	0.0033	0.0063	0.6	689830
rs6439361	3:97472556	1	ARL6	A/G	0.2869	0.001	0.0019	0.61	692494
rs11726779	4:122703201	0	BBS7	A/G	0.782	-0.0011	0.0021	0.61	690515
rs13229765	7:33628567	6	BBS9	T/G	0.8626	-0.0013	0.0025	0.61	689457
rs974386	7:33687010	0	BBS9	C/G	0.1621	-0.0012	0.0024	0.61	687876
rs1982872	8:96285290	0	C8orf37	T/C	0.05823	0.0019	0.0037	0.61	683574
rs880641	8:96221015	0	C8orf37	T/C	0.7922	-0.0011	0.0021	0.61	773625
rs7285123	22:41452876	0	EP300	C/G	0.1197	-0.0014	0.0027	0.61	690058
rs6026561	20:57427132	1	GNAS	T/C	0.6437	-0.0009	0.0017	0.61	795446
rs2022068	22:37199806	0	IFT27	A/G	0.4167	0.0009	0.0018	0.61	683790
rs6904307	6:57121684	0	RAB23	A/G	0.8942	-0.0014	0.0027	0.61	692590
rs17703255	3:97459492	0	ARL6	A/T	0.03227	-0.0024	0.0048	0.62	757867
rs2501556	9:140577178	0	EHMT1	A/G	0.5213	0.0009	0.0018	0.62	676838
rs3785494	17:56289951	0	MKS1	C/G	0.91517	0.0016	0.0032	0.62	688050
rs8031621	15:25272507	0	SNURF	A/G	0.04116	-0.0022	0.0045	0.62	673864
rs10839954	11:7992095	0	TUB	A/G	0.5603	-0.0009	0.0018	0.62	673636
rs3812761	11:8160923	5	TUB	C/G	0.93832	0.0018	0.0036	0.62	692195
rs12545238	8:100663744	44	VPS13B	T/C	0.1148	0.0013	0.0026	0.62	795421
rs2873394	3:97452146	10	ARL6	T/C	0.4784	0.0008	0.0017	0.63	692534
rs10486535	7:33512729	1	BBS9	A/G	0.177	0.0011	0.0023	0.63	680721
rs2700681	7:33636543	5	BBS9	A/G	0.8642	-0.0012	0.0025	0.63	691065
rs11607697	11:27650123	1	BDNF	C/G	0.07232	-0.0014	0.003	0.63	762852
rs985205	11:27758992	2	BDNF	A/T	0.5113	-0.0008	0.0017	0.63	689527
rs11076790	16:3964608	4	CREBBP	C/G	0.2896	0.0009	0.0019	0.63	687935
rs2972391	5:42490129	1	GHR	T/C	0.1538	0.0011	0.0024	0.63	680600
rs8179242	2:27742971	0	IFT172	T/G	0.01526	-0.0037	0.0076	0.63	615675
rs12903906	15:23782767	1	MKRN3	T/C	0.5675	0.0008	0.0017	0.63	771103
rs8036730	15:23771443	3	MKRN3	T/G	0.5619	0.0008	0.0017	0.63	692574
rs16990786	20:5245377	1	PROKR2	A/G	0.91908	0.0015	0.0032	0.63	689776
rs1866955	9:119402563	1	TRIM32	C/G	0.8558	-0.0012	0.0024	0.63	691818
rs1881240	11:8091424	0	TUB	C/G	0.5464	0.0009	0.0018	0.63	679922
rs4578424	11:8108285	1	TUB	A/G	0.247	0.0009	0.0019	0.63	773616
rs9836608	3:97458066	0	ARL6	C/G	0.03584	0.0024	0.0051	0.64	671223
rs2392252	7:33684775	0	BBS9	T/C	0.2054	-0.001	0.0022	0.64	685527
rs13268491	8:96320184	0	C8orf37	C/G	0.4799	-0.0008	0.0017	0.64	689868
rs13167	15:93587102	0	CHD2	T/C	0.8781	0.0013	0.0029	0.64	643436
rs8178375	17:56338778	3	MKS1	T/C	0.8662	-0.0011	0.0024	0.64	781487
rs17393674	5:37075921	0	NIPBL	A/T	0.93773	0.0017	0.0036	0.64	673616
rs220034	15:25210220	11	SNURF	A/G	0.07086	0.0016	0.0034	0.64	692456
rs9791577	7:33554997	0	BBS9	T/C	0.05186	-0.0017	0.0037	0.65	585819
rs13256395	8:96214390	2	C8orf37	T/C	0.5111	0.0008	0.0018	0.65	662483
rs17610424	15:93528054	0	CHD2	A/G	0.0922	-0.0014	0.0032	0.65	653949
rs3125790	9:140637529	26	EHMT1	A/G	0.96475	0.0022	0.0049	0.65	608776
rs2875382	6:84799185	4	MRAP2	T/C	0.206	0.001	0.0022	0.65	692122
rs1640501	15:23955391	0	NDN	T/C	0.1612	0.0012	0.0026	0.65	536459
rs874476	6:100819917	0	SIM1	A/G	0.1685	-0.001	0.0022	0.65	744011
rs2554446	15:25243884	11	SNURF	A/G	0.9389	-0.0017	0.0036	0.65	692380
rs2242504	11:8122943	0	TUB	T/C	0.0656	0.0016	0.0036	0.65	670631
rs12516416	5:132248630	13	AFF4	T/C	0.1624	-0.001	0.0022	0.66	795601
rs17349685	2:73744123	0	ALMS1	A/G	0.94849	-0.0017	0.0039	0.66	674341
rs17349818	2:73792207	0	ALMS1	A/G	0.94668	0.0016	0.0037	0.66	773842
rs10511163	3:97514266	0	ARL6	A/G	0.7999	-0.001	0.0022	0.66	686607
rs1026157	4:123623893	2	BBS12	T/G	0.7704	-0.0009	0.0021	0.66	689835
rs7010065	8:96329707	0	C8orf37	T/C	0.1858	-0.001	0.0022	0.66	689632
rs3761264	20:57413371	1	GNAS	T/C	0.4637	0.0007	0.0016	0.66	791714
rs6092704	20:57468478	1	GNAS	A/C	0.90815	0.0014	0.0031	0.66	690276
rs1139057	9:139380320	0	INPP5E	T/C	0.2117	0.001	0.0022	0.66	685401
rs8038844	15:23847797	7	MAGEL2	T/G	0.227	-0.0009	0.0021	0.66	692219
rs648628	20:10457574	0	MKKS	T/C	0.2569	-0.0009	0.002	0.66	680612
rs9449783	6:84804049	0	MRAP2	A/T	0.0114	-0.0034	0.0077	0.66	660156
rs13163996	5:36977003	15	NIPBL	A/G	0.8582	0.0011	0.0025	0.66	692610
rs9822586	3:71786050	6	PROK2	A/G	0.4162	0.0008	0.0017	0.66	690821
rs984569	6:57130756	0	RAB23	A/T	0.98457	-0.0033	0.0073	0.66	638896
rs17792983	6:100811533	0	SIM1	T/C	0.313	0.0008	0.0019	0.66	677386
rs373804	6:100839198	1	SIM1	T/C	0.97913	0.0027	0.0061	0.66	691312
rs10983334	9:119503742	0	TRIM32	A/C	0.2819	-0.0008	0.0019	0.66	675129
rs803918	9:119467530	10	TRIM32	T/C	0.09121	0.0013	0.003	0.66	691908
rs11041723	11:8078704	0	TUB	A/C	0.5176	0.0008	0.0017	0.66	688672
rs7942171	11:8078798	5	TUB	A/C	0.7671	-0.0009	0.0021	0.66	689412
rs4906717	15:25732749	0	UBE3A	A/T	0.1322	-0.0011	0.0026	0.66	690473
rs544021	11:66315661	3	BBS1	C/G	0.5707	0.0008	0.0017	0.67	689511
rs7980549	12:76751315	12	BBS10	A/G	0.2712	-0.0008	0.0019	0.67	691785
rs1559452	16:56537193	4	BBS2	A/G	0.8119	-0.0009	0.0022	0.67	692393
rs10100688	8:96218165	0	C8orf37	A/G	0.1508	0.001	0.0024	0.67	773471
rs11634022	15:93566411	0	CHD2	A/C	0.8611	-0.0011	0.0026	0.67	645469
rs13081482	3:45908116	6	LZTFL1	A/T	0.92914	0.0014	0.0034	0.67	689949
rs2302313	17:56283026	3	MKS1	A/G	0.1082	-0.0012	0.0029	0.67	691969
rs13071850	3:71847686	2	PROK2	C/G	0.5471	-0.0007	0.0017	0.67	679032
rs1287668	14:89297790	6	TTC8	T/C	0.1826	0.0009	0.0022	0.67	692588
rs9943402	10:112610872	0	BBIP1	A/G	0.1576	-0.001	0.0024	0.68	685694
rs746550	4:123619689	3	BBS12	T/C	0.2309	0.0009	0.0021	0.68	678282
rs12444798	16:56576538	0	BBS2	A/G	0.7252	-0.0008	0.0019	0.68	755009
rs4635497	2:170297631	3	BBS5	A/G	0.4194	0.0007	0.0018	0.68	686274
rs6815050	4:122735868	8	BBS7	T/C	0.7041	-0.0008	0.0019	0.68	692049
rs17736426	7:33694980	0	BBS9	T/C	0.1267	-0.0011	0.0027	0.68	688813
rs2598405	7:33607847	0	BBS9	A/G	0.1107	0.0012	0.003	0.68	660000
rs2283484	16:3969463	7	CREBBP	T/C	0.383	0.0007	0.0018	0.68	674990
rs13041735	20:57378217	0	GNAS	T/C	0.6673	-0.0008	0.0019	0.68	681089
rs2145477	20:57375308	5	GNAS	T/C	0.2512	0.0008	0.0019	0.68	790776
rs17116589	15:23885129	0	MAGEL2	T/G	0.02508	0.0026	0.0062	0.68	547102
rs11629973	15:23799545	0	MKRN3	A/T	0.0677	0.0014	0.0035	0.68	667079
rs10455423	6:84706928	0	MRAP2	T/C	0.02017	0.0026	0.0062	0.68	589154
rs1928280	6:84703588	4	MRAP2	T/C	0.96258	0.0019	0.0048	0.68	691398
rs13095612	3:71851377	0	PROK2	T/C	0.01783	-0.0024	0.0059	0.68	652629
rs2921729	8:117936845	17	RAD21	C/G	0.3254	-0.0008	0.0018	0.68	692210
rs1578275	1:243680442	1	SDCCAG8	C/G	0.1722	-0.0009	0.0022	0.68	690332
rs11195252	10:112406426	0	SMC3	T/C	0.94697	0.0016	0.0039	0.68	674019
rs4482261	15:25157446	0	SNURF	A/T	0.8819	-0.0011	0.0027	0.68	674393
rs4758264	11:8005512	2	TUB	A/G	0.97129	-0.0021	0.0051	0.68	668857
rs17068	15:25570817	2	UBE3A	C/G	0.91037	0.0013	0.0031	0.68	684729
rs920389	15:93421733	0	CHD2	A/G	0.7676	0.0008	0.0021	0.69	662438
rs130008	16:3781952	0	CREBBP	C/G	0.97392	-0.0024	0.006	0.69	616351
rs7495535	15:23848747	0	MAGEL2	A/G	0.8768	-0.001	0.0026	0.69	690577
rs13192345	6:84716349	3	MRAP2	A/G	0.04198	-0.0018	0.0045	0.69	691902
rs6576381	15:24978246	1	NPAP1	A/T	0.3345	0.0008	0.0019	0.69	678610
rs1320015	3:71828420	0	PROK2	T/C	0.4144	-0.0007	0.0018	0.69	675343
rs3818802	1:243449881	4	SDCCAG8	A/G	0.5259	-0.0007	0.0017	0.69	691067
rs7830618	8:100926037	0	VPS13B	T/C	0.8535	0.0011	0.0026	0.69	670850
rs396230	16:56602616	0	BBS2	T/C	0.8341	-0.0009	0.0023	0.7	691595
rs11901329	2:170336659	1	BBS5	T/C	0.8966	-0.0011	0.0029	0.7	689554
rs17265470	8:96265873	0	C8orf37	A/C	0.96597	0.0018	0.0046	0.7	674375
rs1994793	8:96313407	0	C8orf37	C/G	0.4418	-0.0007	0.0018	0.7	677094
rs6887528	5:42623552	0	GHR	T/C	0.06496	-0.0014	0.0036	0.7	671580
rs17116771	15:23907160	0	MAGEL2	A/G	0.1821	0.0009	0.0023	0.7	685982
rs4778319	15:23778772	16	MKRN3	T/G	0.454	-0.0007	0.0017	0.7	689974
rs8067921	17:56313933	0	MKS1	T/C	0.97094	-0.0022	0.0055	0.7	675200
rs10491421	5:37071078	0	NIPBL	A/G	0.02251	0.0025	0.0064	0.7	594201
rs2034107	9:87580367	2	NTRK2	T/G	0.1033	-0.0011	0.0028	0.7	691558
rs4504715	9:87600078	0	NTRK2	A/G	0.1011	0.001	0.0027	0.7	795092
rs2322143	3:71825873	4	PROK2	A/C	0.8811	0.001	0.0027	0.7	691380
rs6801173	3:71795743	6	PROK2	T/C	0.1766	0.0009	0.0022	0.7	692546
rs11195241	10:112389210	2	SMC3	T/G	0.8571	-0.001	0.0025	0.7	691515
rs4906951	15:25575671	1	UBE3A	T/C	0.6632	-0.0007	0.0018	0.7	692579
rs4857294	3:97517118	0	ARL6	C/G	0.8803	-0.001	0.0027	0.71	684853
rs16959711	16:56597606	0	BBS2	A/C	0.01643	0.0026	0.0071	0.71	646545
rs7191207	16:56576059	0	BBS2	T/C	0.896	-0.0012	0.0031	0.71	652262
rs10268593	7:33333163	10	BBS9	A/G	0.7803	-0.0008	0.0021	0.71	692601
rs11104732	12:88477988	1	CEP290	T/C	0.90809	-0.0011	0.003	0.71	691029
rs130039	16:3857224	0	CREBBP	T/C	0.01169	-0.0034	0.0091	0.71	656325
rs130043	16:3860539	0	CREBBP	A/G	0.01538	0.0032	0.0088	0.71	540130
rs686447	20:10462186	0	MKKS	T/C	0.4263	0.0006	0.0018	0.71	690282
rs10839983	11:8174763	3	TUB	T/C	0.09583	-0.0011	0.0029	0.71	692423
rs4581019	8:100085850	0	VPS13B	A/G	0.3726	-0.0007	0.0018	0.71	690990
rs11762294	7:33549537	0	BBS9	A/T	0.7336	0.0007	0.002	0.72	682933
rs4723291	7:33551998	0	BBS9	A/G	0.5372	0.0006	0.0018	0.72	670882
rs7933639	11:27791994	0	BDNF	A/T	0.4978	-0.0007	0.0019	0.72	616396
rs234614	20:57499314	4	GNAS	T/G	0.2873	0.0007	0.0018	0.72	783859
rs2150684	20:10429601	26	MKKS	T/C	0.3943	-0.0006	0.0018	0.72	692433
rs719535	9:119476270	0	TRIM32	T/C	0.2472	-0.0007	0.002	0.72	690154
rs11161183	15:25728835	1	UBE3A	T/C	0.531	0.0006	0.0017	0.72	692346
rs4906952	15:25696179	2	UBE3A	A/C	0.94335	0.0013	0.0038	0.72	690128
rs780	15:25695039	9	UBE3A	T/C	0.2207	-0.0007	0.0021	0.72	692573
rs8179187	15:25652326	0	UBE3A	T/G	0.93347	0.0013	0.0036	0.72	669069
rs7829780	8:100074352	0	VPS13B	C/G	0.8949	-0.001	0.0027	0.72	691028
rs12596017	16:56520014	1	BBS2	T/C	0.8901	0.0009	0.0027	0.73	692053
rs6819870	4:122713059	5	BBS7	A/C	0.8486	0.0008	0.0024	0.73	692276
rs2439632	8:96218944	0	C8orf37	A/G	0.7039	0.0007	0.0019	0.73	659216
rs752842	9:87563932	9	NTRK2	T/C	0.96182	-0.0016	0.0047	0.73	691421
rs3904682	1:243419429	5	SDCCAG8	A/T	0.5081	-0.0006	0.0017	0.73	690958
rs1856803	10:112412111	0	SMC3	A/T	0.757	0.0007	0.0021	0.73	690643
rs4918524	10:112281786	0	SMC3	T/C	0.6679	0.0006	0.0019	0.73	680451
rs11633230	15:25166980	2	SNURF	A/G	0.7014	-0.0007	0.0019	0.73	681586
rs17785279	15:25166757	0	SNURF	C/G	0.95598	0.0015	0.0044	0.73	617047
rs1105984	11:8016730	5	TUB	T/C	0.8539	-0.0009	0.0025	0.73	692535
rs2175376	11:7993219	0	TUB	A/G	0.90365	-0.001	0.0029	0.73	675929
rs7122904	11:8172150	0	TUB	A/C	0.3887	-0.0006	0.0018	0.73	668470
rs13270004	8:96273255	0	C8orf37	T/G	0.3563	-0.0006	0.0018	0.74	690415
rs11631911	15:24915898	0	NPAP1	A/G	0.8599	-0.0008	0.0025	0.74	687915
rs1443439	9:87522410	2	NTRK2	A/C	0.03373	0.0016	0.0048	0.74	688005
rs17087710	9:87409862	0	NTRK2	T/C	0.93148	0.0012	0.0036	0.74	691282
rs10514728	3:71868169	0	PROK2	A/G	0.06338	0.0012	0.0036	0.74	664749
rs9914733	17:17622136	0	RAI1	C/G	0.7761	0.0007	0.0021	0.74	677280
rs1661294	9:119435891	2	TRIM32	A/G	0.4439	0.0006	0.0017	0.74	691627
rs1287660	14:89286845	11	TTC8	T/G	0.4307	-0.0006	0.0016	0.74	795479
rs1881238	11:8091173	0	TUB	A/G	0.1798	-0.0008	0.0023	0.74	658259
rs17115567	15:25654926	10	UBE3A	A/G	0.95352	-0.0014	0.0043	0.74	692116
rs7175661	15:25707072	3	UBE3A	C/G	0.1745	-0.0007	0.0023	0.74	691291
rs6815948	4:123633510	10	BBS12	A/G	0.01918	-0.0018	0.0057	0.75	758956
rs4784675	16:56540190	0	BBS2	C/G	0.1452	0.0008	0.0024	0.75	689104
rs7184422	16:56485795	0	BBS2	A/G	0.08495	-0.001	0.0032	0.75	692424
rs1441393	8:96248443	0	C8orf37	A/G	0.1893	0.0007	0.0022	0.75	672782
rs2439636	8:96212069	0	C8orf37	A/G	0.5232	0.0006	0.0018	0.75	671610
rs7167842	15:93555250	0	CHD2	A/G	0.6243	0.0006	0.0018	0.75	691133
rs1639150	16:3747204	0	CREBBP	T/C	0.4284	-0.0006	0.0018	0.75	683936
rs17174788	17:56282968	0	MKS1	C/G	0.03917	-0.0012	0.0038	0.75	562111
rs215974	6:84695892	0	MRAP2	A/G	0.8986	0.001	0.003	0.75	619673
rs1838158	9:87473009	2	NTRK2	A/G	0.8566	0.0008	0.0024	0.75	688998
rs1899637	9:87576008	1	NTRK2	A/G	0.0777	-0.0011	0.0034	0.75	679572
rs17009019	3:71880670	2	PROK2	T/C	0.03362	-0.0016	0.0049	0.75	686533
rs2647355	15:25161431	0	SNURF	A/G	0.5993	-0.0006	0.0018	0.75	675699
rs17124948	14:89362069	1	TTC8	T/C	0.01204	-0.0027	0.0085	0.75	601738
rs720150	15:25733042	0	UBE3A	A/G	0.04554	0.0014	0.0043	0.75	682329
rs3105175	8:100509872	0	VPS13B	A/G	0.07022	0.001	0.0033	0.75	676361
rs4307309	8:100138205	0	VPS13B	T/C	0.8975	0.0009	0.0028	0.75	682745
rs17731290	8:96251039	0	C8orf37	A/G	0.8087	0.0006	0.0021	0.76	788312
rs8413	9:139323311	9	INPP5E	T/C	0.572	-0.0005	0.0016	0.76	788178
rs833839	12:49366890	0	KMT2D	A/T	0.5239	0.0005	0.0017	0.76	676737
rs17078348	3:45847241	1	LZTFL1	A/G	0.91078	0.0009	0.0031	0.76	684258
rs850819	15:23939177	1	MAGEL2	A/G	0.90827	-0.0009	0.0032	0.76	616843
rs6559837	9:87540476	0	NTRK2	A/G	0.02216	-0.0014	0.0047	0.76	584809
rs3856568	3:97502472	6	ARL6	A/G	0.7637	0.0006	0.0019	0.77	787755
rs7844993	8:96268289	1	C8orf37	T/C	0.7291	-0.0006	0.002	0.77	682465
rs11074130	15:93583742	0	CHD2	T/G	0.08729	-0.001	0.0034	0.77	625119
rs2501562	9:140593514	0	EHMT1	T/C	0.8792	0.0008	0.0027	0.77	675158
rs2294976	22:41564708	2	EP300	A/C	0.09249	-0.0009	0.003	0.77	691733
rs234627	20:57486980	1	GNAS	T/C	0.2857	0.0006	0.0019	0.77	681936
rs5756345	22:37195630	3	IFT27	C/G	0.5191	-0.0005	0.0018	0.77	689464
rs1883091	3:45882779	7	LZTFL1	A/G	0.07986	-0.0009	0.0032	0.77	692182
rs6039905	20:10369381	2	MKKS	T/C	0.2869	0.0006	0.0019	0.77	691464
rs301904	5:37111565	0	NIPBL	A/G	0.09296	0.0009	0.003	0.77	691572
rs7907617	10:112398015	0	SMC3	T/G	0.8738	-0.0008	0.0027	0.77	688135
rs12352766	9:119473765	1	TRIM32	A/G	0.03789	-0.0013	0.0045	0.77	677023
rs11637057	15:25719127	0	UBE3A	T/C	0.5119	0.0005	0.0017	0.77	687172
rs17619753	2:63943616	11	WDPCP	A/G	0.1951	0.0006	0.0022	0.77	690357
rs7814493	8:96214372	4	C8orf37	T/G	0.05426	-0.0011	0.0038	0.78	677575
rs2091635	15:93616903	0	CHD2	T/C	0.97229	-0.0016	0.0056	0.78	599952
rs4665381	2:27757150	0	IFT172	A/C	0.5109	0.0004	0.0016	0.78	792605
rs7266639	20:5283765	4	PROKR2	A/G	0.122	0.0007	0.0026	0.78	692519
rs704480	6:57091166	0	RAB23	A/G	0.8411	0.0007	0.0023	0.78	687966
rs12674923	8:117810592	0	RAD21	A/G	0.009998	-0.0027	0.0096	0.78	652373
rs3798486	6:100905295	2	SIM1	T/G	0.03321	0.0013	0.0048	0.78	678206
rs2075814	15:25165776	0	SNURF	A/G	0.8773	0.0008	0.0027	0.78	691414
rs2291548	8:100336447	0	VPS13B	T/C	0.115	0.0007	0.0027	0.78	692441
rs6546020	2:63909132	0	WDPCP	A/G	0.4248	0.0005	0.0017	0.78	775544
rs17128099	10:112638393	6	BBIP1	A/G	0.97381	0.0016	0.0059	0.79	691627
rs4918606	10:112609973	0	BBIP1	T/G	0.2021	-0.0006	0.0022	0.79	671255
rs7977224	12:76699126	1	BBS10	T/C	0.1002	-0.0008	0.0028	0.79	692125
rs4784681	16:56578749	0	BBS2	A/T	0.03946	0.0013	0.0046	0.79	676457
rs7812444	8:96314064	0	C8orf37	T/C	0.4394	0.0005	0.0018	0.79	676723
rs4529492	8:117936869	15	RAD21	A/G	0.09735	0.0008	0.003	0.79	689017
rs10927020	1:243602390	0	SDCCAG8	A/G	0.351	0.0005	0.0019	0.79	656962
rs10769861	11:8007515	1	TUB	A/G	0.37	0.0005	0.0018	0.79	683810
rs16935849	11:8127196	0	TUB	A/G	0.03689	0.0013	0.0049	0.79	667057
rs10496192	2:73679866	4	ALMS1	T/C	0.8271	-0.0006	0.0023	0.8	692510
rs4723295	7:33625209	1	BBS9	T/C	0.8862	-0.0007	0.0027	0.8	692591
rs4484658	8:96208726	1	C8orf37	T/C	0.1334	0.0007	0.0026	0.8	649618
rs732068	8:96225099	0	C8orf37	T/C	0.5868	0.0004	0.0017	0.8	773467
rs4786430	16:3733734	0	CREBBP	T/C	0.05151	0.001	0.004	0.8	691060
rs3764451	5:42398465	0	GHR	T/C	0.8517	-0.0006	0.0024	0.8	688380
rs4410646	5:42569642	0	GHR	A/C	0.90458	-0.0008	0.0031	0.8	667726
rs2224323	20:5319133	2	PROKR2	T/C	0.8613	-0.0006	0.0026	0.8	686981
rs12360430	10:112389743	11	SMC3	A/G	0.8706	0.0006	0.0026	0.8	680426
rs7175773	15:25636864	45	UBE3A	C/G	0.1223	-0.0006	0.0026	0.8	692496
rs6718864	2:73574591	36	ALMS1	A/G	0.6816	-0.0004	0.0018	0.81	789755
rs13273059	8:96229760	0	C8orf37	A/G	0.7875	-0.0005	0.0022	0.81	686770
rs7003496	8:96289014	2	C8orf37	A/G	0.94352	0.001	0.004	0.81	690680
rs13155002	5:42465036	0	GHR	T/C	0.96971	-0.0013	0.0054	0.81	660853
rs11634519	15:23910859	0	MAGEL2	T/C	0.02344	0.0013	0.0056	0.81	612295
rs17116917	15:23914637	11	MAGEL2	T/C	0.232	-0.0005	0.0021	0.81	690288
rs8028728	15:23919993	6	MAGEL2	C/G	0.211	-0.0005	0.0022	0.81	692353
rs3784246	15:24921649	0	NPAP1	T/C	0.92458	-0.0008	0.0033	0.81	692565
rs12569687	10:112413690	2	SMC3	T/G	0.08729	0.0007	0.0031	0.81	691693
rs11601274	11:8034175	0	TUB	T/C	0.8277	-0.0005	0.0022	0.81	763251
rs1492076	8:100464671	3	VPS13B	T/C	0.8868	0.0006	0.0027	0.81	680830
rs1863495	15:72965611	0	BBS4	A/G	0.96001	0.0011	0.0051	0.82	674069
rs13258855	8:96239849	1	C8orf37	T/C	0.3808	-0.0004	0.0018	0.82	687876
rs12426625	12:88453072	1	CEP290	A/G	0.7992	-0.0005	0.0022	0.82	689490
rs7289423	22:37114785	2	IFT27	T/G	0.08302	-0.0007	0.0032	0.82	750078
rs11145988	9:139321545	1	INPP5E	A/G	0.1218	0.0006	0.0026	0.82	769765
rs4324105	15:24953429	0	NPAP1	C/G	0.8069	-0.0006	0.0025	0.82	518974
rs12221285	10:112377435	32	SMC3	A/C	0.09436	0.0007	0.0028	0.82	783758
rs1419901	7:33523792	0	BBS9	T/G	0.2637	-0.0004	0.002	0.83	671371
rs11637211	15:23923575	0	MAGEL2	A/G	0.8284	0.0005	0.0024	0.83	673792
rs6108599	20:10458953	0	MKKS	T/C	0.8987	-0.0006	0.0029	0.83	659467
rs17729906	6:84767124	2	MRAP2	T/C	0.8207	-0.0005	0.0022	0.83	692568
rs12441186	15:25726075	0	UBE3A	T/C	0.7229	-0.0004	0.0019	0.83	773433
rs4308702	8:96237529	0	C8orf37	A/G	0.8506	0.0005	0.0025	0.84	670926
rs12318967	12:88513562	1	CEP290	A/G	0.738	0.0004	0.0019	0.84	692151
rs7402385	15:93570241	0	CHD2	T/C	0.03403	0.001	0.0049	0.84	661718
rs833843	12:49364391	1	KMT2D	A/G	0.462	0.0004	0.0017	0.84	689587
rs10485092	6:84807678	0	MRAP2	T/G	0.94072	-0.0008	0.0038	0.84	653044
rs7867851	9:87348397	0	NTRK2	A/C	0.02081	0.0012	0.0063	0.84	618299
rs4677053	3:71871268	0	PROK2	T/G	0.3366	0.0004	0.0018	0.84	691309
rs12449807	17:17575668	5	RAI1	A/T	0.02619	-0.0011	0.0057	0.84	673733
rs12252225	10:112393992	10	SMC3	C/G	0.1311	-0.0005	0.0026	0.84	689552
rs7028544	9:119490572	0	TRIM32	A/G	0.612	-0.0004	0.0018	0.84	660065
rs4758272	11:8053159	0	TUB	A/G	0.2733	-0.0004	0.002	0.84	692573
rs6576426	15:25703563	1	UBE3A	A/G	0.8958	0.0006	0.0029	0.84	692423
rs1386374	8:100650223	1	VPS13B	A/G	0.262	0.0004	0.0019	0.84	791672
rs769244	4:122741630	0	BBS7	A/T	0.96954	0.0012	0.0065	0.85	627943
rs17170316	7:33673265	4	BBS9	T/G	0.03181	-0.001	0.005	0.85	684948
rs13257907	8:96215073	8	C8orf37	A/C	0.669	0.0003	0.0017	0.85	770410
rs38025	16:3763734	1	CREBBP	T/C	0.8203	-0.0004	0.0023	0.85	684363
rs4778324	15:23905679	8	MAGEL2	A/T	0.06735	-0.0007	0.0035	0.85	691503
rs10511019	3:71847452	0	PROK2	T/C	0.7739	-0.0004	0.0021	0.85	671012
rs10817928	9:119489376	0	TRIM32	T/C	0.3868	-0.0003	0.0018	0.85	690690
rs17348176	2:63449561	1	WDPCP	A/G	0.8568	-0.0005	0.0025	0.85	688127
rs6724782	2:73679990	98	ALMS1	A/T	0.2377	0.0004	0.002	0.86	692596
rs10281514	7:33153307	0	BBS9	C/G	0.2582	0.0003	0.002	0.86	671521
rs11971061	7:33554974	0	BBS9	T/C	0.04408	-0.0008	0.0045	0.86	590346
rs7793862	7:33304218	0	BBS9	T/C	0.7301	-0.0003	0.0019	0.86	691948
rs11990752	8:96215924	0	C8orf37	A/T	0.4746	0.0003	0.0018	0.86	679661
rs13270711	8:96242136	9	C8orf37	T/C	0.5181	0.0003	0.0017	0.86	692586
rs11632092	15:93453274	0	CHD2	T/C	0.849	0.0004	0.0024	0.86	686892
rs12592393	15:93388928	0	CHD2	A/G	0.95352	0.0008	0.0045	0.86	663695
rs12625742	20:57379648	0	GNAS	T/G	0.2789	0.0003	0.002	0.86	682171
rs11646118	16:29926471	0	KCTD13	T/C	0.92019	-0.0005	0.0031	0.86	689970
rs12441183	15:23833777	0	MKRN3	T/C	0.56	-0.0003	0.0018	0.86	654133
rs2921755	8:117915557	0	RAD21	A/G	0.6742	-0.0003	0.0019	0.86	680889
rs4233830	2:170354917	1	BBS5	A/T	0.4545	0.0003	0.0017	0.87	689377
rs12597773	16:3764709	0	CREBBP	A/G	0.08261	0.0006	0.0035	0.87	638102
rs4266763	9:139289825	9	INPP5E	A/G	0.5765	0.0003	0.0017	0.87	692489
rs4378078	9:139375962	10	INPP5E	A/G	0.5513	-0.0003	0.0017	0.87	692417
rs6108512	20:10352565	7	MKKS	A/C	0.7088	0.0003	0.0019	0.87	684553
rs1928279	6:84753438	0	MRAP2	C/G	0.8746	0.0004	0.0027	0.87	690085
rs10098598	8:117860775	0	RAD21	T/C	0.03613	0.0008	0.0051	0.87	657157
rs1107442	10:112303595	0	SMC3	T/C	0.8016	0.0004	0.0022	0.87	679336
rs13253769	8:100032844	0	VPS13B	A/G	0.4428	-0.0003	0.0017	0.87	687805
rs7841688	8:100867321	0	VPS13B	A/G	0.4181	0.0003	0.0018	0.87	663875
rs1885794	10:112611576	0	BBIP1	A/G	0.0863	-0.0005	0.0031	0.88	681823
rs9392	16:3775169	0	CREBBP	A/G	0.2229	-0.0003	0.0022	0.88	662015
rs6898743	5:42602492	0	GHR	C/G	0.2318	-0.0003	0.0021	0.88	652126
rs2236938	3:45938939	2	LZTFL1	A/G	0.09167	0.0004	0.003	0.88	691894
rs221668	20:10392595	1	MKKS	A/G	0.7727	0.0003	0.0021	0.88	683185
rs6074138	20:10418801	2	MKKS	A/G	0.6635	0.0003	0.0018	0.88	690430
rs9359579	6:84701055	1	MRAP2	A/G	0.03192	-0.0008	0.005	0.88	687397
rs11140816	9:87603614	3	NTRK2	A/T	0.97884	-0.001	0.0062	0.88	675882
rs4676844	3:71883565	0	PROK2	A/G	0.2813	0.0003	0.002	0.88	679498
rs7629632	3:71847123	0	PROK2	A/G	0.6651	-0.0003	0.0018	0.88	680820
rs11579221	1:243535038	0	SDCCAG8	T/C	0.05051	0.0006	0.0043	0.88	644115
rs4906708	15:25617979	15	UBE3A	T/C	0.2226	-0.0003	0.0021	0.88	692563
rs12550211	8:96243774	0	C8orf37	T/C	0.07402	-0.0005	0.0035	0.89	671398
rs2514565	8:96217043	0	C8orf37	T/C	0.468	-0.0003	0.0018	0.89	660531
rs6989157	8:96320757	1	C8orf37	A/G	0.134	-0.0003	0.0025	0.89	691251
rs11852510	15:93574492	0	CHD2	T/G	0.94253	-0.0006	0.004	0.89	645482
rs4778052	15:93421244	0	CHD2	T/C	0.1669	0.0003	0.0024	0.89	667917
rs12552149	9:140527310	0	EHMT1	T/C	0.01959	0.0009	0.0061	0.89	632837
rs1046088	22:41574383	0	EP300	A/C	0.96094	0.0007	0.0048	0.89	662232
rs13057109	22:41441937	0	EP300	A/T	0.96106	0.0007	0.0048	0.89	666521
rs12153462	5:42506773	0	GHR	T/C	0.03783	-0.0006	0.0043	0.89	623196
rs11161318	15:23888266	0	MAGEL2	A/G	0.1073	-0.0004	0.0029	0.89	683419
rs7496565	15:23795542	0	MKRN3	A/G	0.1938	0.0003	0.0022	0.89	689926
rs11041705	11:8022345	2	TUB	A/G	0.8077	0.0003	0.0021	0.89	794814
rs7929026	11:8017744	1	TUB	T/G	0.02485	0.0008	0.0057	0.89	664706
rs11780969	8:100629527	2	VPS13B	T/G	0.05081	-0.0006	0.0041	0.89	676432
rs11974148	7:33274454	1	BBS9	A/C	0.97065	-0.0007	0.0052	0.9	670155
rs17015450	12:88483999	9	CEP290	T/C	0.97919	-0.0008	0.0059	0.9	687465
rs6077751	20:10352744	2	MKKS	A/C	0.4114	0.0002	0.0018	0.9	683293
rs857011	20:10456485	0	MKKS	A/G	0.5904	0.0002	0.0018	0.9	662608
rs8178373	17:56338154	0	MKS1	A/C	0.0235	0.0007	0.005	0.9	642081
rs1080960	6:84815421	5	MRAP2	T/C	0.068	0.0004	0.0034	0.9	692544
rs6576374	15:24877779	0	NPAP1	A/G	0.0753	-0.0004	0.0034	0.9	547991
rs941445	17:17680560	2	RAI1	T/G	0.06238	0.0004	0.0035	0.9	789541
rs11195244	10:112397144	0	SMC3	T/C	0.7042	0.0002	0.0019	0.9	680126
rs1541759	15:25275357	13	SNURF	T/C	0.3651	0.0002	0.0017	0.9	784967
rs10983320	9:119483689	2	TRIM32	T/C	0.4633	-0.0002	0.0017	0.9	692564
rs7155535	14:89310346	27	TTC8	T/C	0.6118	-0.0002	0.0018	0.9	691594
rs2242503	11:8118472	0	TUB	T/C	0.336	0.0002	0.0018	0.9	682537
rs11684858	2:73643627	0	ALMS1	T/G	0.94089	-0.0004	0.0038	0.91	674857
rs11598889	10:112668045	0	BBIP1	T/C	0.98205	0.0007	0.0065	0.91	679451
rs4436020	7:33685424	2	BBS9	T/C	0.06899	0.0004	0.0035	0.91	681809
rs6462481	7:33510616	0	BBS9	T/C	0.2326	0.0002	0.0021	0.91	677256
rs6965715	7:33246454	0	BBS9	T/G	0.96691	-0.0006	0.0052	0.91	655387
rs6976117	7:33373632	0	BBS9	A/C	0.02035	-0.0007	0.0059	0.91	660198
rs12682395	8:96329223	1	C8orf37	T/C	0.9862	0.001	0.0089	0.91	631872
rs7815085	8:96275140	2	C8orf37	A/C	0.98053	-0.0007	0.0067	0.91	674366
rs6064708	20:57374671	4	GNAS	A/G	0.2533	0.0002	0.002	0.91	684642
rs2047102	12:49486219	0	KMT2D	T/G	0.02608	-0.0007	0.0058	0.91	662396
rs1947402	15:24919452	1	NPAP1	A/G	0.94855	0.0004	0.0039	0.91	691310
rs4361832	9:87595734	2	NTRK2	A/G	0.1779	0.0002	0.0023	0.91	691666
rs7874649	9:87468716	3	NTRK2	T/G	0.1317	0.0003	0.0025	0.91	691195
rs923559	9:87616532	33	NTRK2	A/G	0.2696	-0.0002	0.0019	0.91	692459
rs17114852	15:25166183	0	SNURF	T/G	0.06192	-0.0005	0.0041	0.91	530792
rs10118266	9:119509276	1	TRIM32	T/C	0.07133	0.0004	0.0034	0.91	692461
rs11159878	14:89382941	0	TTC8	A/G	0.645	-0.0002	0.0018	0.91	680387
rs17774352	14:89359605	0	TTC8	A/G	0.08752	-0.0003	0.003	0.91	688355
rs10089778	8:100295634	1	VPS13B	T/C	0.97977	-0.0007	0.0062	0.91	675476
rs7951189	11:66281270	0	BBS1	A/G	0.2964	0.0002	0.0019	0.92	688253
rs10745779	12:76727179	2	BBS10	A/G	0.345	0.0002	0.0018	0.92	686301
rs11104711	12:88393916	0	CEP290	T/C	0.9337	-0.0003	0.0036	0.92	673449
rs12103876	17:56267766	2	MKS1	A/C	0.96749	0.0005	0.0051	0.92	675199
rs2322152	3:71846831	0	PROK2	A/G	0.0725	-0.0003	0.0034	0.92	679485
rs11195220	10:112368621	1	SMC3	A/T	0.0739	0.0003	0.0034	0.92	691241
rs12361499	11:8150185	5	TUB	T/C	0.96866	-0.0005	0.0049	0.92	682038
rs4442113	8:100180871	2	VPS13B	A/G	0.6655	-0.0002	0.0018	0.92	691295
rs1881244	2:73645089	1	ALMS1	A/G	0.06531	0.0003	0.0035	0.93	680091
rs11615969	12:76726936	0	BBS10	T/C	0.94539	0.0003	0.004	0.93	655295
rs13438256	7:33499270	0	BBS9	T/C	0.6719	0.0002	0.0018	0.93	683889
rs13267037	8:96263842	5	C8orf37	A/G	0.1039	0.0002	0.0028	0.93	692349
rs1492655	8:96303118	5	C8orf37	T/C	0.03566	0.0004	0.0045	0.93	689521
rs3887013	15:93614127	0	CHD2	T/C	0.09846	-0.0002	0.0029	0.93	733443
rs3789033	16:3839535	3	CREBBP	T/C	0.7603	-0.0002	0.002	0.93	692600
rs3730170	20:57480420	0	GNAS	T/C	0.97895	-0.0006	0.0069	0.93	609051
rs965808	20:57408426	0	GNAS	A/C	0.7753	-0.0002	0.0021	0.93	681444
rs12380077	9:87606413	4	NTRK2	A/G	0.01637	0.0007	0.0072	0.93	662761
rs1822420	9:87467276	4	NTRK2	T/C	0.1321	0.0002	0.0025	0.93	689460
rs996822	20:5250423	0	PROKR2	T/C	0.2955	0.0002	0.0019	0.93	689179
rs9303142	17:17590736	4	RAI1	T/C	0.02485	-0.0005	0.0058	0.93	681143
rs1449782	8:100724363	1	VPS13B	T/C	0.91879	0.0002	0.0028	0.93	680729
rs10519309	2:73672629	0	ALMS1	T/C	0.0725	-0.0003	0.0033	0.94	684026
rs7919142	10:112668253	2	BBIP1	T/C	0.95428	-0.0003	0.0038	0.94	794543
rs10486541	7:33667314	0	BBS9	A/G	0.1459	-0.0002	0.0025	0.94	688117
rs2700689	7:33664944	5	BBS9	A/C	0.96328	0.0004	0.005	0.94	683969
rs9878896	3:71881411	0	PROK2	T/C	0.6942	-0.0001	0.002	0.94	632453
rs17774506	14:89370679	0	TTC8	A/G	0.95942	0.0003	0.0045	0.94	674188
rs1108277	11:8121218	0	TUB	A/C	0.3954	-0.0001	0.0018	0.94	690322
rs2353187	2:170339003	0	BBS5	A/C	0.7754	-0.0001	0.0021	0.95	689810
rs12592212	15:93528015	0	CHD2	T/C	0.1994	0.0001	0.0022	0.95	676779
rs11137300	9:140801512	0	EHMT1	T/C	0.03759	0.0003	0.0044	0.95	665453
rs7037079	9:139352273	0	INPP5E	A/G	0.97463	0.0004	0.0058	0.95	668304
rs708934	20:10456586	0	MKKS	T/C	0.707	0.0001	0.0019	0.95	672334
rs11791090	9:87589960	1	NTRK2	A/G	0.06735	-0.0002	0.0035	0.95	677864
rs6782813	3:71821490	2	PROK2	T/C	0.05408	-0.0002	0.0038	0.95	678330
rs7644362	3:71829242	0	PROK2	A/G	0.8248	0.0002	0.0023	0.95	692079
rs7748758	6:100793037	1	SIM1	A/G	0.03531	0.0003	0.0049	0.95	688935
rs7951923	11:8012077	1	TUB	A/C	0.7819	-0.0001	0.002	0.95	793452
rs6989201	8:100107731	54	VPS13B	A/G	0.1666	0.0002	0.0022	0.95	794620
rs6451620	5:42473114	0	GHR	A/G	0.06022	0.0002	0.0038	0.96	676115
rs240763	6:100952874	0	SIM1	T/C	0.4704	-0.0001	0.0017	0.96	762007
rs10787248	10:112313437	6	SMC3	T/C	0.2606	-0.0001	0.002	0.96	690333
rs11195248	10:112402993	0	SMC3	C/G	0.3327	0.0001	0.0019	0.96	688684
rs4918545	10:112389932	0	SMC3	A/T	0.2742	-0.0001	0.002	0.96	690814
rs12913403	15:25218003	1	SNURF	A/G	0.97691	0.0003	0.0058	0.96	628945
rs7114039	11:8089999	0	TUB	T/C	0.5469	-0.0001	0.0018	0.96	660091
rs1031347	7:33622386	6	BBS9	A/C	0.8324	-0.0001	0.0023	0.97	688100
rs13272104	8:96268020	6	C8orf37	A/G	0.08448	0.0001	0.003	0.97	692287
rs12438714	15:93585975	0	CHD2	T/G	0.06525	0.0001	0.0037	0.97	668576
rs11145846	9:139285655	0	INPP5E	A/G	0.96556	0.0002	0.005	0.97	688869
rs12633699	3:45922735	0	LZTFL1	A/G	0.0176	0.0003	0.0079	0.97	611869
rs758386	3:45817418	0	LZTFL1	A/G	0.04373	0.0001	0.0041	0.97	679395
rs7496929	15:23853079	13	MAGEL2	T/C	0.7868	0.0001	0.0021	0.97	692364
rs2808707	9:87558294	1	NTRK2	T/G	0.4144	0.0001	0.0018	0.97	685098
rs9349851	6:57129077	1	RAB23	T/C	0.4227	-0.0001	0.0017	0.97	692483
rs17786183	15:25241791	0	SNURF	T/C	0.1005	0.0001	0.0033	0.97	658036
rs7863462	9:119409536	0	TRIM32	A/G	0.04402	0.0002	0.0042	0.97	674695
rs9657672	9:119489348	0	TRIM32	T/C	0.3668	-0.0001	0.0018	0.97	677187
rs2180917	14:89392656	2	TTC8	C/G	0.7412	0.0001	0.002	0.97	691677
rs10808362	8:100191814	3	VPS13B	A/T	0.3402	-0.0001	0.0018	0.97	691210
rs10865343	2:64052392	0	WDPCP	T/C	0.2518	0.0001	0.002	0.97	686640
rs10183306	2:170299550	3	BBS5	C/G	0.01672	0.0002	0.0078	0.98	640361
rs11677954	2:170296525	8	BBS5	C/G	0.6623	0	0.0018	0.98	692218
rs1451017	7:33600759	0	BBS9	A/G	0.07109	-0.0001	0.0035	0.98	691722
rs1881841	15:93589837	1	CHD2	A/G	0.8234	0.0001	0.0024	0.98	546190
rs6026565	20:57439308	0	GNAS	A/T	0.1016	0.0001	0.0028	0.98	771807
rs6576461	15:23814372	0	MKRN3	A/G	0.322	0	0.0019	0.98	673381
rs2191244	17:56260605	2	MKS1	A/C	0.08922	0.0001	0.003	0.98	679195
rs2934798	5:36831885	0	NIPBL	A/C	0.04274	-0.0001	0.0045	0.98	679094
rs6766242	3:71841203	0	PROK2	T/C	0.4846	-0.0001	0.0017	0.98	680687
rs9310221	3:71849696	0	PROK2	A/G	0.4236	0	0.0017	0.98	779753
rs9891217	17:17552233	1	RAI1	T/C	0.97784	-0.0002	0.006	0.98	673229
rs11635023	15:25158051	1	SNURF	A/G	0.5133	0	0.0018	0.98	669548
rs11041707	11:8026414	0	TUB	A/G	0.93844	-0.0001	0.004	0.98	656867
rs1354728	3:97558176	5	ARL6	A/G	0.724	0	0.0019	0.99	689581
rs4833842	4:123627821	0	BBS12	T/C	0.06133	0.0001	0.0038	0.99	679477
rs4289147	2:170299240	0	BBS5	A/G	0.7618	0	0.002	0.99	689390
rs2598404	7:33611480	0	BBS9	T/G	0.7004	0	0.0019	0.99	684520
rs6947669	7:33292857	4	BBS9	T/G	0.02409	0	0.0058	0.99	664230
rs9912728	17:56247454	14	MKS1	A/G	0.8849	0	0.0027	0.99	692509
rs8037163	15:24955615	0	NPAP1	T/G	0.1558	0	0.0025	0.99	681002
rs4906939	15:25201579	8	SNURF	T/C	0.3487	0	0.0018	0.99	692251
rs12421498	11:8171902	0	TUB	A/G	0.90242	0	0.0028	0.99	691821
rs2220679	8:100359742	2	VPS13B	T/C	0.01795	-0.0001	0.0064	0.99	682847
rs766675	8:100450929	86	VPS13B	A/G	0.8349	0	0.0022	0.99	795392
rs4705985	5:132342361	0	AFF4	C/G	0.95966	0	0.0048	1	582858
rs2252497	7:33603108	0	BBS9	A/C	0.0549	0	0.004	1	581888
rs6133938	20:10427474	0	MKKS	T/C	0.95527	0	0.005	1	655014
rs12414450	10:112283719	0	SMC3	A/G	0.7478	0	0.0021	1	653737

## Sheet: 5C
Supplementary Table 5C. Summary statistics of all SNPs tested in single-marker analysis using a ±20kb gene definition. Significant associations (P<1.01×10-5) are highlighted in grey.
SNP	Chr:position	Gene	Alleles	EAF	β	SE	P	N
rs6265	11:27679916	BDNF	T/C	0.1951	-0.0412	0.0021	1e-86	795458
rs2049045	11:27694241	BDNF	C/G	0.1842	-0.0405	0.0021	1.9e-83	793584
rs11030104	11:27684517	BDNF	A/G	0.7891	0.0393	0.002	2e-83	794765
rs16917237	11:27702383	BDNF	T/G	0.2105	-0.0393	0.002	2.7e-83	787789
rs7103411	11:27700125	BDNF	T/C	0.7841	0.0385	0.002	1.6e-82	795623
rs2030323	11:27728539	BDNF	A/C	0.2149	-0.0383	0.002	8.4e-82	795269
rs10501087	11:27670108	BDNF	T/C	0.791	0.0384	0.002	2.9e-79	795220
rs925947	11:27667367	BDNF	T/G	0.209	-0.0385	0.0021	1.1e-78	774560
rs4923460	11:27656789	BDNF	T/G	0.2088	-0.0376	0.002	1.9e-77	794867
rs4923461	11:27656910	BDNF	A/G	0.7912	0.0376	0.002	3.4e-77	795259
rs10767664	11:27725986	BDNF	A/T	0.785	0.0385	0.0021	5.5e-77	731192
rs988748	11:27724745	BDNF	C/G	0.2187	-0.0379	0.0021	1.6e-75	739603
rs6484320	11:27703188	BDNF	A/T	0.7849	0.0382	0.0021	2e-72	692257
rs12419948	11:27666984	BDNF	A/T	0.209	-0.038	0.0022	1.1e-69	692275
rs1013402	11:27712381	BDNF	A/G	0.6829	-0.0295	0.0018	1.3e-63	793174
rs1401635	11:27693991	BDNF	C/G	0.3154	0.0295	0.0018	1.6e-63	788991
rs11030108	11:27695464	BDNF	A/G	0.3153	0.0294	0.0018	3.5e-63	794680
rs1519480	11:27675712	BDNF	T/C	0.6813	-0.0292	0.0018	1.4e-62	793242
rs10767658	11:27672252	BDNF	C/G	0.3085	0.0293	0.0018	1.6e-62	781752
rs11030119	11:27728102	BDNF	A/G	0.3014	0.0295	0.0018	1.8e-62	793224
rs7127507	11:27714884	BDNF	T/C	0.6749	-0.0287	0.0017	3.1e-62	793067
rs962369	11:27734420	BDNF	T/C	0.6988	-0.0296	0.0018	7.6e-62	792827
rs925946	11:27667202	BDNF	T/G	0.3088	0.029	0.0018	2.2e-61	795513
rs7124442	11:27677041	BDNF	T/C	0.6832	-0.0286	0.0017	4.6e-61	793435
rs7498665	16:28883241	SH2B1	A/G	0.5962	-0.0271	0.0017	5.6e-60	790299
rs3888190	16:28889486	SH2B1	A/C	0.4038	0.0271	0.0017	9.2e-60	794486
rs11030121	11:27736207	BDNF	T/C	0.3103	0.0287	0.0018	1.2e-59	790200
rs4788101	16:28867804	SH2B1	T/C	0.4038	0.027	0.0017	1.4e-59	795541
rs8055982	16:28881202	SH2B1	A/C	0.5962	-0.027	0.0017	1.6e-59	795565
rs4788102	16:28873398	SH2B1	A/G	0.4039	0.027	0.0017	2.7e-59	795549
rs4788099	16:28855727	SH2B1	A/G	0.5963	-0.0269	0.0017	4.8e-59	795572
rs7187776	16:28857645	SH2B1	A/G	0.5927	-0.0265	0.0016	1.4e-58	792563
rs8061590	16:28895130	SH2B1	A/G	0.5969	-0.0268	0.0017	1.8e-58	793970
rs7359397	16:28885659	SH2B1	T/C	0.4021	0.0267	0.0017	4.9e-58	795625
rs12325113	16:28848668	SH2B1	T/C	0.5975	-0.0265	0.0017	1.7e-57	795568
rs12443881	16:28841777	SH2B1	T/C	0.4023	0.0265	0.0017	1.9e-57	795596
rs8055138	16:28891465	SH2B1	T/C	0.4038	0.0269	0.0017	7.2e-57	737455
rs10835211	11:27701365	BDNF	A/G	0.261	0.0289	0.0019	2e-54	795539
rs11030107	11:27694835	BDNF	A/G	0.7422	-0.0289	0.0019	2.3e-54	794663
rs11030102	11:27681596	BDNF	C/G	0.7422	-0.0288	0.0019	3.2e-54	794512
rs17309874	11:27667236	BDNF	A/G	0.2565	0.0283	0.0019	5.4e-52	792413
rs4788100	16:28864673	SH2B1	T/C	0.5971	-0.026	0.0018	1.7e-49	692604
rs7205323	16:28865892	SH2B1	T/C	0.4031	0.0259	0.0018	2e-49	692478
rs12325278	16:28848818	SH2B1	A/G	0.5963	-0.0258	0.0018	4.3e-49	692435
rs6565259	16:28898793	SH2B1	T/C	0.6297	-0.025	0.0017	2.4e-48	785070
rs7187333	16:28865916	SH2B1	A/G	0.4014	0.0256	0.0018	2.6e-48	692470
rs12928404	16:28847246	SH2B1	T/C	0.5865	-0.0254	0.0018	9.1e-48	691290
rs9972768	16:28861734	SH2B1	A/C	0.5963	-0.0266	0.0018	2.5e-47	579697
rs9972693	16:28859802	SH2B1	A/G	0.5963	-0.0267	0.0019	8.8e-47	558456
rs12444171	16:28845251	SH2B1	A/G	0.4036	0.0266	0.0019	1.7e-46	559349
rs17309930	11:27748493	BDNF	A/C	0.2028	0.0281	0.002	6.3e-44	791415
rs12273363	11:27744859	BDNF	T/C	0.7962	-0.0281	0.002	6.9e-44	792066
rs12288512	11:27747671	BDNF	A/G	0.2028	0.0281	0.002	8.6e-44	794179
rs11649612	16:29946670	KCTD13	T/C	0.4595	-0.022	0.0017	2e-37	692025
rs12716974	16:29944832	KCTD13	A/G	0.5405	0.022	0.0017	3.4e-37	692535
rs12444978	16:29924422	KCTD13	A/T	0.4618	-0.0218	0.0017	9.6e-37	692475
rs4407079	16:29931899	KCTD13	A/G	0.5385	0.0217	0.0017	2.4e-36	692449
rs4609871	16:29932064	KCTD13	T/C	0.5391	0.0217	0.0017	2.7e-36	692522
rs12716973	16:29937652	KCTD13	A/G	0.5435	0.021	0.0017	3.7e-34	692129
rs12716972	16:29936654	KCTD13	A/G	0.4567	-0.0209	0.0017	1.2e-33	692460
rs12448482	16:28838073	SH2B1	A/G	0.3395	-0.0197	0.0018	5.2e-29	767054
rs7498491	16:28844068	SH2B1	A/T	0.6565	0.0192	0.0017	1e-28	793260
rs4548895	16:29923510	KCTD13	A/G	0.6076	0.0183	0.0018	3.9e-24	683393
rs11647753	16:29928115	KCTD13	A/G	0.3817	-0.0178	0.0018	9.6e-24	690444
rs10459647	15:73035241	BBS4	T/C	0.3561	-0.0163	0.0018	7.2e-20	691064
rs8025333	15:73025121	BBS4	A/G	0.3565	-0.0161	0.0018	1.4e-19	691760
rs9460	15:73044575	BBS4	A/G	0.642	0.0163	0.0018	1.5e-19	690067
rs8024986	15:73024868	BBS4	T/C	0.6397	0.0161	0.0018	1.7e-19	692489
rs2277598	15:73027478	BBS4	T/C	0.3559	-0.0161	0.0018	2.2e-19	692591
rs8033580	15:72994968	BBS4	A/C	0.6448	0.0161	0.0018	5e-19	690131
rs7167076	15:73028873	BBS4	A/G	0.3566	-0.0159	0.0018	5.3e-19	690862
rs730180	15:73007893	BBS4	A/G	0.7886	0.0176	0.002	5.4e-19	792607
rs7176235	15:72999104	BBS4	A/G	0.3597	-0.0159	0.0018	1.1e-18	689430
rs7178130	15:72978202	BBS4	A/G	0.6379	0.0156	0.0018	6.8e-18	688608
rs11072384	15:73001314	BBS4	T/C	0.2085	-0.0178	0.0021	1.7e-17	691516
rs2012253	15:73008123	BBS4	A/G	0.209	-0.0175	0.0022	5.1e-16	636285
rs17826791	15:73011994	BBS4	C/G	0.883	0.0207	0.0026	2.2e-15	692047
rs1975327	15:73019391	BBS4	A/G	0.8823	0.0207	0.0026	2.2e-15	692285
rs6704286	1:243678389	SDCCAG8	T/G	0.145	0.0203	0.0026	2.8e-15	690606
rs17753768	15:72995969	BBS4	T/C	0.117	-0.0206	0.0026	4.1e-15	691890
rs12372979	15:73015760	BBS4	A/C	0.8752	0.0198	0.0026	1.9e-14	691239
rs3850988	15:72989224	BBS4	A/G	0.2551	-0.0141	0.0019	4.9e-14	791754
rs8026559	15:72976511	BBS4	A/T	0.2712	-0.0144	0.0019	1.1e-13	689794
rs7497429	15:72981631	BBS4	A/T	0.2513	-0.0145	0.002	2.6e-13	689907
rs8033644	15:73010784	BBS4	A/G	0.2496	-0.0144	0.002	4.4e-13	690370
rs17753627	15:72975502	BBS4	A/G	0.8743	0.0185	0.0026	5.5e-13	691173
rs908867	11:27745764	BDNF	T/C	0.09594	0.0187	0.0027	6.7e-12	794383
rs12448738	16:56489343	BBS2	A/C	0.8629	-0.0168	0.0025	2.8e-11	691932
rs12444921	16:56503416	BBS2	T/G	0.8682	-0.0166	0.0025	4.7e-11	692218
rs2288055	16:56501806	BBS2	T/C	0.1362	0.0166	0.0025	4.9e-11	692220
rs11344	16:29910518	KCTD13	C/G	0.6443	-0.012	0.0018	5e-11	690444
rs1187352	9:87293457	NTRK2	T/C	0.3482	-0.0119	0.0018	6e-11	688522
rs11640452	16:56525060	BBS2	A/G	0.1725	0.0152	0.0023	6.1e-11	692303
rs11030123	11:27748285	BDNF	A/G	0.09822	0.018	0.0028	6.3e-11	772096
rs7498372	16:29910725	KCTD13	A/G	0.6421	-0.0122	0.0019	6.9e-11	637232
rs8049949	16:56530377	BBS2	A/G	0.8652	-0.0164	0.0025	7.4e-11	692333
rs3228	16:56511245	BBS2	T/G	0.865	-0.0164	0.0025	7.9e-11	691695
rs918784	16:56512769	BBS2	A/G	0.8637	-0.0164	0.0025	8e-11	692277
rs11649379	16:56493573	BBS2	T/C	0.1716	0.0147	0.0023	9.3e-11	691694
rs2288056	16:56519097	BBS2	A/G	0.8651	-0.0163	0.0025	9.9e-11	692328
rs12447395	16:56529340	BBS2	T/C	0.8617	-0.0163	0.0025	1.1e-10	690595
rs2161738	16:56542340	BBS2	C/G	0.8651	-0.0162	0.0025	1.3e-10	689414
rs12447295	16:56542121	BBS2	T/C	0.8286	-0.0145	0.0023	1.8e-10	689412
rs1187321	9:87283031	NTRK2	A/T	0.8041	0.0137	0.0022	2.5e-10	692346
rs1147194	9:87272731	NTRK2	T/C	0.196	-0.0136	0.0022	3.5e-10	692607
rs1260326	2:27730940	IFT172	T/C	0.4027	-0.0105	0.0017	3.9e-10	784462
rs1147199	9:87275895	NTRK2	A/G	0.1974	-0.0136	0.0022	4.5e-10	684867
rs1211166	9:87285992	NTRK2	A/G	0.8054	0.0135	0.0022	5e-10	691935
rs1187323	9:87283416	NTRK2	A/C	0.8057	0.0135	0.0022	5.3e-10	692237
rs11792069	9:140646121	EHMT1	A/G	0.83	0.0145	0.0024	6.5e-10	644252
rs7184983	16:56554709	BBS2	A/G	0.1323	0.0159	0.0026	6.8e-10	692044
rs2997494	1:243614681	SDCCAG8	A/G	0.08986	0.0198	0.0032	8e-10	680483
rs7975791	12:49413486	KMT2D	T/C	0.03601	-0.0264	0.0043	1.1e-09	770139
rs3006927	1:243657399	SDCCAG8	T/C	0.8332	-0.0147	0.0024	1.2e-09	691638
rs1187351	9:87295077	NTRK2	A/C	0.3993	-0.0106	0.0018	2.1e-09	687350
rs1619120	9:87302196	NTRK2	A/G	0.4013	-0.0099	0.0017	2.4e-09	791760
rs11373	16:56545175	BBS2	T/C	0.8289	-0.0144	0.0024	3.4e-09	555283
rs12042959	1:243533273	SDCCAG8	A/G	0.8495	0.0144	0.0024	3.4e-09	685384
rs12478556	2:63341711	WDPCP	A/T	0.4177	0.0103	0.0018	4.5e-09	683709
rs3006928	1:243658030	SDCCAG8	A/G	0.1498	0.0151	0.0026	4.7e-09	684732
rs12029086	1:243564722	SDCCAG8	T/G	0.1421	-0.0142	0.0025	6.6e-09	692525
rs1187336	9:87316868	NTRK2	A/T	0.373	-0.0103	0.0018	7e-09	692361
rs1187337	9:87316037	NTRK2	T/C	0.4519	-0.01	0.0017	7e-09	692144
rs4671457	2:63346356	WDPCP	T/C	0.4166	0.0101	0.0018	7.4e-09	684558
rs1659400	9:87325994	NTRK2	A/G	0.4573	-0.0099	0.0017	1e-08	691232
rs12933766	16:29922011	KCTD13	T/C	0.5734	0.0104	0.0018	1.1e-08	625550
rs1659401	9:87324683	NTRK2	T/C	0.5425	0.0098	0.0017	1.1e-08	691214
rs1778931	9:87323775	NTRK2	A/G	0.4573	-0.0098	0.0017	1.1e-08	691239
rs6429425	1:243590990	SDCCAG8	T/G	0.1451	-0.0141	0.0025	1.1e-08	690495
rs2265	9:87331606	NTRK2	T/C	0.5425	0.0098	0.0017	1.3e-08	691089
rs12037698	1:243584345	SDCCAG8	A/G	0.1451	-0.014	0.0025	1.5e-08	678629
rs2162014	2:63345507	WDPCP	A/C	0.4158	0.0099	0.0018	1.5e-08	683144
rs1857859	6:100894587	SIM1	A/G	0.2701	-0.0103	0.0018	1.7e-08	795389
rs2489162	9:87333742	NTRK2	A/G	0.5424	0.0097	0.0017	1.8e-08	690829
rs1439048	9:87327889	NTRK2	T/G	0.4577	-0.0097	0.0017	1.9e-08	691272
rs1778932	9:87324212	NTRK2	A/G	0.5427	0.0097	0.0017	1.9e-08	691225
rs4820429	22:41538111	EP300	C/G	0.285	-0.0107	0.0019	2.3e-08	691942
rs1129700	16:29918034	KCTD13	T/C	0.4373	-0.0099	0.0018	2.3e-08	677226
rs1187343	9:87308783	NTRK2	A/G	0.6221	0.0099	0.0018	2.3e-08	692591
rs2579369	9:87329587	NTRK2	T/C	0.4583	-0.0096	0.0017	2.3e-08	691159
rs2918626	9:87328983	NTRK2	T/C	0.4662	-0.0091	0.0016	2.3e-08	794721
rs7510675	22:41549297	EP300	A/G	0.2851	-0.0107	0.0019	2.4e-08	691932
rs881301	8:38332318	FGFR1	T/C	0.5818	-0.0097	0.0017	2.4e-08	691753
rs6929748	6:100929394	SIM1	T/C	0.4469	-0.0096	0.0017	2.5e-08	690840
rs10927006	1:243557659	SDCCAG8	T/C	0.851	0.0136	0.0024	2.8e-08	683551
rs11644679	16:56490549	BBS2	A/G	0.1681	0.0122	0.0022	2.9e-08	790999
rs10875910	12:49402393	KMT2D	C/G	0.3625	0.01	0.0018	3.1e-08	690113
rs11168850	12:49472965	KMT2D	A/G	0.4446	0.0096	0.0017	3.1e-08	690146
rs2397974	6:100925828	SIM1	T/C	0.5536	0.0095	0.0017	3.1e-08	691048
rs10875912	12:49416944	KMT2D	T/C	0.6355	-0.01	0.0018	3.3e-08	690454
rs2071826	6:100928357	SIM1	A/G	0.5534	0.0095	0.0017	3.3e-08	690746
rs10927010	1:243578812	SDCCAG8	A/G	0.1409	-0.0138	0.0025	3.4e-08	679522
rs12140432	1:243596287	SDCCAG8	A/G	0.1415	-0.0138	0.0025	3.4e-08	679168
rs3026659	22:38396220	SOX10	T/C	0.3649	-0.01	0.0018	3.4e-08	683489
rs11614738	12:49424616	KMT2D	A/G	0.3628	0.01	0.0018	3.7e-08	689702
rs10927016	1:243595136	SDCCAG8	T/C	0.1401	-0.0137	0.0025	3.9e-08	690820
rs5758223	22:41489920	EP300	A/G	0.7147	0.0106	0.0019	4e-08	689935
rs9386154	6:100923704	SIM1	C/G	0.5536	0.0094	0.0017	4.3e-08	691125
rs7201929	16:28871966	SH2B1	T/C	0.7566	0.0105	0.0019	4.6e-08	794892
rs6901854	6:100932291	SIM1	T/C	0.5427	0.0094	0.0017	4.7e-08	690970
rs1187356	9:87305257	NTRK2	A/T	0.5734	0.0094	0.0017	5.6e-08	691095
rs1569858	22:41541024	EP300	A/G	0.3784	-0.0097	0.0018	5.9e-08	692122
rs7969091	12:49464449	KMT2D	A/G	0.555	-0.0094	0.0017	6e-08	683642
rs893582	9:87310361	NTRK2	A/G	0.4266	-0.0093	0.0017	6.8e-08	691145
rs2038209	22:41594611	EP300	T/C	0.3821	-0.0096	0.0018	6.9e-08	690009
rs2413637	22:41541527	EP300	C/G	0.6221	0.0096	0.0018	7e-08	691972
rs12035042	1:243583899	SDCCAG8	T/G	0.8506	0.0132	0.0025	7e-08	678699
rs4822011	22:41550954	EP300	T/C	0.6212	0.0096	0.0018	7.3e-08	692115
rs738631	22:41511176	EP300	A/G	0.6225	0.0096	0.0018	7.3e-08	691775
rs1187341	9:87311715	NTRK2	T/G	0.5736	0.0094	0.0017	7.3e-08	685057
rs20552	22:41551039	EP300	A/T	0.6211	0.0097	0.0018	7.5e-08	690634
rs4820431	22:41549921	EP300	A/C	0.377	-0.0096	0.0018	7.5e-08	691789
rs1847912	6:100880696	SIM1	A/G	0.7567	0.0108	0.002	7.6e-08	690617
rs10459232	12:49467076	KMT2D	A/C	0.5562	-0.0094	0.0017	7.7e-08	684033
rs7773043	6:100921115	SIM1	A/G	0.5443	0.0092	0.0017	7.7e-08	691960
rs4822006	22:41519362	EP300	T/C	0.379	-0.0096	0.0018	7.9e-08	692425
rs2076577	22:41568480	EP300	T/C	0.3791	-0.0096	0.0018	8.1e-08	692054
rs1033611	22:41558232	EP300	A/G	0.3817	-0.0096	0.0018	8.2e-08	692079
rs5758237	22:41515744	EP300	T/G	0.3799	-0.0096	0.0018	8.4e-08	692051
rs5758238	22:41519308	EP300	A/G	0.6207	0.0095	0.0018	8.4e-08	692455
rs2157342	6:100920655	SIM1	A/T	0.5448	0.0092	0.0017	8.8e-08	692565
rs3798497	6:100878858	SIM1	A/G	0.7993	0.0115	0.0022	8.8e-08	690322
rs11687645	2:63562369	WDPCP	A/T	0.5682	-0.0092	0.0017	8.9e-08	691390
rs4822005	22:41514155	EP300	A/G	0.6201	0.0095	0.0018	9.5e-08	692013
rs13021322	2:63558590	WDPCP	T/C	0.4318	0.0092	0.0017	9.5e-08	691561
rs12580349	12:49436724	KMT2D	A/G	0.637	-0.0097	0.0018	9.6e-08	688209
rs7773661	6:100919209	SIM1	A/G	0.4573	-0.0091	0.0017	1.2e-07	692598
rs766314	22:41490680	EP300	C/G	0.6227	0.0094	0.0018	1.3e-07	689227
rs10173115	2:63355520	WDPCP	A/T	0.465	0.0091	0.0017	1.3e-07	684346
rs11691192	2:63561079	WDPCP	A/C	0.4318	0.0091	0.0017	1.5e-07	685315
rs9611497	22:41507400	EP300	A/G	0.3788	-0.0094	0.0018	1.7e-07	689536
rs4840132	6:100914602	SIM1	T/C	0.5415	0.009	0.0017	1.7e-07	691237
rs2994322	1:243639018	SDCCAG8	C/G	0.8048	-0.0121	0.0023	1.8e-07	672797
rs2267424	22:41489526	EP300	A/C	0.6204	0.0093	0.0018	1.9e-07	689225
rs8061877	16:28856819	SH2B1	T/C	0.2449	-0.0109	0.0021	1.9e-07	594804
rs1506080	6:100889855	SIM1	A/T	0.2647	-0.0101	0.0019	2e-07	692110
rs241819	6:100910798	SIM1	A/G	0.5413	0.0089	0.0017	2e-07	692550
rs3798492	6:100888625	SIM1	T/C	0.265	-0.0101	0.0019	2e-07	691943
rs4822002	22:41487344	EP300	A/G	0.6202	0.0093	0.0018	2.1e-07	689141
rs4822004	22:41502825	EP300	T/G	0.3799	-0.0093	0.0018	2.1e-07	689320
rs139886	22:38371328	SOX10	T/C	0.6266	-0.0096	0.0019	2.2e-07	593570
rs3798490	6:100894179	SIM1	A/G	0.7349	0.01	0.0019	2.6e-07	692598
rs3830139	6:100896289	SIM1	T/G	0.7346	0.0102	0.002	2.9e-07	636230
rs13387839	2:63428571	WDPCP	T/C	0.2853	0.0092	0.0018	2.9e-07	791783
rs833836	12:49451459	KMT2D	T/C	0.1441	-0.013	0.0025	3.1e-07	670427
rs5758231	22:41504049	EP300	C/G	0.3817	-0.0091	0.0018	3.3e-07	683552
rs12118439	1:243596371	SDCCAG8	T/C	0.1524	-0.0122	0.0024	3.6e-07	690912
rs6026567	20:57444915	GNAS	A/G	0.571	-0.0092	0.0018	4.4e-07	659708
rs12039979	1:243597228	SDCCAG8	A/G	0.1524	-0.0122	0.0024	4.5e-07	679533
rs12140393	1:243596231	SDCCAG8	A/G	0.1524	-0.0122	0.0024	4.5e-07	679156
rs3778032	6:100883851	SIM1	A/C	0.736	0.0097	0.0019	4.7e-07	692542
rs12713488	2:63586777	WDPCP	T/C	0.438	0.0087	0.0017	4.7e-07	691424
rs2144342	22:41513094	EP300	T/G	0.6201	0.0092	0.0018	4.8e-07	638264
rs1996401	2:63573748	WDPCP	T/G	0.4378	0.0087	0.0017	4.9e-07	691881
rs7513566	1:243588601	SDCCAG8	T/C	0.1528	-0.0114	0.0023	5e-07	793570
rs11682642	2:63608550	WDPCP	C/G	0.5616	-0.0086	0.0017	5e-07	692194
rs12615652	2:63607538	WDPCP	C/G	0.5616	-0.0086	0.0017	5.1e-07	692112
rs262507	2:63883612	WDPCP	A/C	0.2803	0.0096	0.0019	5.1e-07	687544
rs12988058	2:63592397	WDPCP	C/G	0.562	-0.0086	0.0017	5.2e-07	692179
rs7538558	1:243589513	SDCCAG8	A/G	0.1527	-0.0121	0.0024	5.4e-07	678882
rs7537757	1:243594664	SDCCAG8	C/G	0.1527	-0.0121	0.0024	5.5e-07	678968
rs6722981	2:63916722	WDPCP	T/C	0.3472	-0.0091	0.0018	5.5e-07	684203
rs1607201	2:63614160	WDPCP	C/G	0.5613	-0.0086	0.0017	5.6e-07	692089
rs17765088	3:45943595	LZTFL1	C/G	0.8817	-0.0136	0.0027	5.7e-07	666309
rs3778030	6:100906046	SIM1	T/G	0.2651	-0.0097	0.0019	5.7e-07	690036
rs12138272	1:243594202	SDCCAG8	A/G	0.1527	-0.0121	0.0024	5.8e-07	678957
rs6735907	2:63731604	WDPCP	A/G	0.5548	0.0086	0.0017	5.8e-07	689962
rs10927017	1:243595813	SDCCAG8	A/G	0.1524	-0.0121	0.0024	5.9e-07	679134
rs1922422	2:63593212	WDPCP	T/C	0.5616	-0.0086	0.0017	5.9e-07	692117
rs767933	6:100888408	SIM1	C/G	0.2987	-0.0093	0.0019	6e-07	691606
rs262501	2:63858657	WDPCP	A/G	0.7115	-0.0094	0.0019	6.1e-07	690734
rs12151606	2:63430175	WDPCP	T/C	0.6952	-0.0089	0.0018	6.3e-07	792363
rs2422008	2:63780605	WDPCP	A/C	0.4324	-0.0086	0.0017	6.5e-07	690008
rs139889	22:38386787	SOX10	A/C	0.681	-0.0093	0.0019	6.6e-07	690052
rs262503	2:63860437	WDPCP	A/G	0.7114	-0.0094	0.0019	6.6e-07	690762
rs196125	2:63859268	WDPCP	T/C	0.7118	-0.0094	0.0019	7e-07	690745
rs7584404	2:63794342	WDPCP	T/C	0.7125	-0.0094	0.0019	7e-07	690815
rs10200146	2:63819348	WDPCP	A/G	0.4395	-0.0085	0.0017	7.1e-07	690559
rs13417333	2:63913840	WDPCP	T/C	0.3468	-0.009	0.0018	7.1e-07	683484
rs2677436	2:63495935	WDPCP	A/T	0.2915	0.0093	0.0019	7.1e-07	691776
rs262504	2:63861235	WDPCP	C/G	0.2884	0.0093	0.0019	7.3e-07	690746
rs2168275	2:63912336	WDPCP	A/G	0.6533	0.009	0.0018	7.6e-07	683373
rs2138796	2:63609017	WDPCP	A/T	0.4398	0.0085	0.0017	7.8e-07	692037
rs2699388	2:63496137	WDPCP	A/C	0.7107	-0.0093	0.0019	7.8e-07	691711
rs1001904	9:87271616	NTRK2	T/C	0.892	0.0137	0.0028	7.9e-07	692554
rs4671492	2:63594846	WDPCP	T/C	0.438	0.0085	0.0017	8e-07	692281
rs1550860	2:63779539	WDPCP	T/C	0.2847	0.0094	0.0019	8.4e-07	691108
rs4560098	2:63522578	WDPCP	A/G	0.2896	0.0093	0.0019	8.4e-07	692121
rs4416201	2:63512837	WDPCP	A/G	0.2894	0.0093	0.0019	8.5e-07	691994
rs1001905	9:87272519	NTRK2	A/G	0.108	-0.0136	0.0028	8.7e-07	692574
rs190519	2:63858425	WDPCP	A/T	0.7029	-0.0093	0.0019	8.7e-07	690015
rs6545984	2:63517133	WDPCP	T/G	0.2894	0.0093	0.0019	8.7e-07	691984
rs6705776	2:63521487	WDPCP	T/C	0.2895	0.0093	0.0019	8.7e-07	692129
rs970278	2:63497554	WDPCP	A/C	0.2879	0.0093	0.0019	8.8e-07	691835
rs4428008	2:63522515	WDPCP	T/C	0.7105	-0.0093	0.0019	8.9e-07	692121
rs964903	2:63741548	WDPCP	T/C	0.7125	-0.0093	0.0019	8.9e-07	691627
rs1147195	9:87273174	NTRK2	T/C	0.108	-0.0136	0.0028	9.1e-07	692547
rs1659412	9:87278152	NTRK2	A/G	0.892	0.0136	0.0028	9.1e-07	685059
rs12105140	2:63797218	WDPCP	A/G	0.2862	0.0093	0.0019	9.1e-07	690718
rs10173637	2:63512121	WDPCP	A/G	0.2879	0.0093	0.0019	9.2e-07	691966
rs932173	2:63602689	WDPCP	T/G	0.5599	-0.0084	0.0017	9.2e-07	692219
rs1201364	9:87267378	NTRK2	A/G	0.108	-0.0136	0.0028	9.3e-07	692396
rs2945032	2:63498200	WDPCP	A/C	0.7107	-0.0092	0.0019	9.4e-07	691923
rs6717031	2:63774540	WDPCP	T/C	0.7153	-0.0094	0.0019	9.4e-07	691075
rs12713476	2:63509850	WDPCP	T/G	0.2894	0.0092	0.0019	9.5e-07	692016
rs6738190	2:63767199	WDPCP	A/G	0.2845	0.0094	0.0019	9.8e-07	690856
rs12713496	2:63768467	WDPCP	T/C	0.2845	0.0093	0.0019	9.9e-07	690861
rs1607203	2:63494269	WDPCP	T/C	0.2893	0.0092	0.0019	9.9e-07	691757
rs2166494	2:63778628	WDPCP	A/T	0.7149	-0.0093	0.0019	9.9e-07	691093
rs2677439	2:63496998	WDPCP	A/G	0.2879	0.0092	0.0019	9.9e-07	691843
rs4611627	2:63517996	WDPCP	T/G	0.2905	0.0092	0.0019	9.9e-07	692108
rs17060614	6:100895462	SIM1	T/G	0.2992	-0.0092	0.0019	1e-06	692097
rs1023820	2:63764963	WDPCP	C/G	0.7155	-0.0093	0.0019	1e-06	690870
rs11125957	2:63518472	WDPCP	A/G	0.7106	-0.0092	0.0019	1e-06	692118
rs2421881	2:63512685	WDPCP	T/C	0.2879	0.0092	0.0019	1e-06	691965
rs262472	2:63833616	WDPCP	A/G	0.7121	-0.0092	0.0019	1e-06	691207
rs2677438	2:63496076	WDPCP	C/G	0.2893	0.0092	0.0019	1e-06	691592
rs4671515	2:63768917	WDPCP	T/C	0.2845	0.0093	0.0019	1e-06	690863
rs7585664	2:63548716	WDPCP	T/C	0.713	-0.0093	0.0019	1e-06	689532
rs959195	2:63804125	WDPCP	A/G	0.7115	-0.0092	0.0019	1e-06	691501
rs11161347	15:23948049	NDN	A/G	0.4831	0.0085	0.0018	1.1e-06	672682
rs1936435	9:87383777	NTRK2	A/C	0.3004	-0.0092	0.0019	1.1e-06	686240
rs4877877	9:87363424	NTRK2	C/G	0.304	-0.0092	0.0019	1.1e-06	689238
rs1876156	6:100853996	SIM1	C/G	0.3496	0.0087	0.0018	1.1e-06	691564
rs3778037	6:100844095	SIM1	T/C	0.6502	-0.0087	0.0018	1.1e-06	692600
rs11895059	2:63601260	WDPCP	T/G	0.4405	0.0084	0.0017	1.1e-06	692373
rs1446565	2:63731575	WDPCP	T/C	0.2875	0.0092	0.0019	1.1e-06	691777
rs174485	2:63857402	WDPCP	A/G	0.7116	-0.0092	0.0019	1.1e-06	690212
rs1867847	2:63777155	WDPCP	A/G	0.7154	-0.0093	0.0019	1.1e-06	691007
rs196124	2:63854138	WDPCP	A/G	0.2884	0.0092	0.0019	1.1e-06	690583
rs2421916	2:63447682	WDPCP	T/G	0.6261	0.0082	0.0017	1.1e-06	787706
rs2421952	2:63749833	WDPCP	T/C	0.2875	0.0092	0.0019	1.1e-06	691839
rs2604613	2:63832776	WDPCP	A/G	0.7121	-0.0092	0.0019	1.1e-06	691211
rs262476	2:63870607	WDPCP	T/C	0.713	-0.0092	0.0019	1.1e-06	690328
rs262493	2:63845066	WDPCP	A/C	0.7112	-0.0092	0.0019	1.1e-06	690552
rs7596446	2:63512206	WDPCP	T/C	0.2879	0.0092	0.0019	1.1e-06	684845
rs964880	2:63826932	WDPCP	A/C	0.7121	-0.0092	0.0019	1.1e-06	691276
rs7497973	15:23948571	NDN	A/G	0.5162	-0.0086	0.0018	1.2e-06	663503
rs1662697	9:87395876	NTRK2	T/G	0.3012	-0.0092	0.0019	1.2e-06	684069
rs12049318	1:243593660	SDCCAG8	A/C	0.1569	-0.0117	0.0024	1.2e-06	679044
rs3734353	6:100896569	SIM1	T/G	0.6999	0.0091	0.0019	1.2e-06	690001
rs10168545	2:63734284	WDPCP	A/C	0.7124	-0.0091	0.0019	1.2e-06	691729
rs10469944	2:63816672	WDPCP	C/G	0.2881	0.0091	0.0019	1.2e-06	691361
rs10469945	2:63816776	WDPCP	T/C	0.2882	0.0092	0.0019	1.2e-06	691359
rs1446569	2:63818314	WDPCP	C/G	0.2881	0.0091	0.0019	1.2e-06	691314
rs1607205	2:63500508	WDPCP	A/G	0.7107	-0.0091	0.0019	1.2e-06	691504
rs185499	2:63867523	WDPCP	T/G	0.7135	-0.0092	0.0019	1.2e-06	690404
rs2121350	2:63778919	WDPCP	A/G	0.2846	0.0093	0.0019	1.2e-06	691158
rs262473	2:63833813	WDPCP	T/G	0.7118	-0.0091	0.0019	1.2e-06	691288
rs262487	2:63880517	WDPCP	A/C	0.2881	0.0092	0.0019	1.2e-06	690341
rs6546018	2:63817422	WDPCP	T/G	0.7112	-0.0091	0.0019	1.2e-06	691366
rs6546019	2:63817440	WDPCP	A/G	0.2884	0.0091	0.0019	1.2e-06	691367
rs7576316	2:63741122	WDPCP	A/G	0.7124	-0.0091	0.0019	1.2e-06	691790
rs1852029	15:23947116	NDN	T/G	0.515	-0.0085	0.0018	1.3e-06	673355
rs1255	2:63825934	WDPCP	T/C	0.2879	0.0091	0.0019	1.3e-06	691303
rs1356388	2:63595981	WDPCP	T/C	0.4393	0.0083	0.0017	1.3e-06	692318
rs1867849	2:63726932	WDPCP	T/C	0.7125	-0.0091	0.0019	1.3e-06	691663
rs2422007	2:63780776	WDPCP	A/C	0.2889	0.0092	0.0019	1.3e-06	691056
rs262505	2:63861786	WDPCP	T/C	0.7128	-0.0091	0.0019	1.3e-06	690640
rs6546007	2:63724795	WDPCP	T/C	0.7126	-0.0092	0.0019	1.3e-06	691637
rs989527	2:63726791	WDPCP	T/G	0.7125	-0.0091	0.0019	1.3e-06	691655
rs1187362	9:87338267	NTRK2	A/T	0.6978	0.0091	0.0019	1.4e-06	685665
rs6420253	9:87381820	NTRK2	T/C	0.6909	0.0091	0.0019	1.4e-06	686580
rs893584	9:87290992	NTRK2	A/G	0.4196	-0.0084	0.0017	1.4e-06	687583
rs10865338	2:63732509	WDPCP	A/G	0.2875	0.0091	0.0019	1.4e-06	691762
rs112194	2:63876872	WDPCP	T/G	0.2865	0.0092	0.0019	1.4e-06	690389
rs11899999	2:63601292	WDPCP	A/G	0.4401	0.0083	0.0017	1.4e-06	692563
rs1446564	2:63731682	WDPCP	A/G	0.2875	0.0091	0.0019	1.4e-06	691780
rs262483	2:63877246	WDPCP	C/G	0.7135	-0.0092	0.0019	1.4e-06	690304
rs6546009	2:63745742	WDPCP	C/G	0.7126	-0.0091	0.0019	1.4e-06	691840
rs7570031	2:63792265	WDPCP	A/G	0.2865	0.0091	0.0019	1.4e-06	691193
rs2293445	12:49398862	KMT2D	A/G	0.3946	0.0085	0.0018	1.5e-06	690225
rs2215753	15:23945167	NDN	T/C	0.484	0.0085	0.0018	1.5e-06	659453
rs699330	15:23936670	NDN	T/G	0.3944	0.0088	0.0018	1.5e-06	658946
rs1876157	6:100854133	SIM1	T/C	0.65	-0.0086	0.0018	1.5e-06	691575
rs1031221	2:63742810	WDPCP	T/C	0.2875	0.0091	0.0019	1.5e-06	691882
rs11693909	2:63777670	WDPCP	T/C	0.2834	0.0092	0.0019	1.5e-06	691067
rs262477	2:63870959	WDPCP	T/G	0.2864	0.0091	0.0019	1.5e-06	690413
rs262482	2:63877042	WDPCP	T/C	0.7135	-0.0091	0.0019	1.5e-06	690358
rs262484	2:63878015	WDPCP	A/G	0.2864	0.0091	0.0019	1.5e-06	690334
rs752579	17:17660347	RAI1	T/C	0.6077	0.0082	0.0017	1.6e-06	781905
rs187801	2:63867446	WDPCP	T/G	0.7135	-0.0091	0.0019	1.6e-06	690327
rs262490	2:63837651	WDPCP	A/G	0.2879	0.009	0.0019	1.6e-06	691033
rs9789351	2:63740614	WDPCP	A/G	0.2875	0.009	0.0019	1.6e-06	691763
rs3782357	12:49427652	KMT2D	T/C	0.394	0.0084	0.0018	1.8e-06	688634
rs1778933	9:87324411	NTRK2	T/C	0.6714	0.0088	0.0018	1.8e-06	691087
rs1936434	9:87383801	NTRK2	T/G	0.3007	-0.009	0.0019	1.8e-06	686044
rs1411578	6:57054843	RAB23	C/G	0.8428	-0.0111	0.0023	1.8e-06	690046
rs4925108	17:17649423	RAI1	T/C	0.5995	0.0081	0.0017	1.8e-06	781581
rs10176522	2:63722433	WDPCP	T/C	0.2863	0.0091	0.0019	1.8e-06	692004
rs1022351	2:63649731	WDPCP	T/C	0.4215	-0.0083	0.0017	1.8e-06	690114
rs2305157	2:63822785	WDPCP	T/C	0.2868	0.009	0.0019	1.8e-06	690633
rs10875913	12:49419308	KMT2D	T/C	0.6048	-0.0084	0.0018	1.9e-06	690014
rs13211871	6:100835221	SIM1	T/C	0.6479	-0.0085	0.0018	1.9e-06	692537
rs12713478	2:63526336	WDPCP	T/C	0.6969	-0.0089	0.0019	1.9e-06	692388
rs2051128	9:87376774	NTRK2	A/G	0.301	-0.0091	0.0019	2e-06	681033
rs11691718	2:63524614	WDPCP	A/G	0.697	-0.0089	0.0019	2e-06	691905
rs12994711	2:63528235	WDPCP	A/G	0.697	-0.0089	0.0019	2e-06	692427
rs2030188	2:63509313	WDPCP	C/G	0.6969	-0.0089	0.0019	2e-06	692288
rs262517	2:63891261	WDPCP	T/G	0.7139	-0.009	0.0019	2e-06	691382
rs6708847	2:63527581	WDPCP	T/C	0.3031	0.0089	0.0019	2e-06	692421
rs6709115	2:63527859	WDPCP	T/C	0.3044	0.0089	0.0019	2e-06	692397
rs10875915	12:49430094	KMT2D	T/C	0.3935	0.0084	0.0018	2.1e-06	688127
rs17060530	6:100859947	SIM1	T/C	0.6492	-0.0085	0.0018	2.1e-06	692233
rs4839779	6:100832728	SIM1	A/G	0.3511	0.0084	0.0018	2.1e-06	692536
rs13422170	2:63645747	WDPCP	T/C	0.5786	0.0082	0.0017	2.1e-06	690105
rs2028887	2:63716223	WDPCP	A/G	0.2911	0.0089	0.0019	2.1e-06	691272
rs4671476	2:63524639	WDPCP	T/C	0.303	0.0089	0.0019	2.1e-06	692408
rs7591562	2:63525102	WDPCP	A/G	0.697	-0.0089	0.0019	2.1e-06	692395
rs7026180	9:87385256	NTRK2	A/C	0.3008	-0.009	0.0019	2.2e-06	685621
rs1395119	6:100837889	SIM1	A/T	0.3514	0.0084	0.0018	2.2e-06	692597
rs1400688	2:63538536	WDPCP	T/C	0.697	-0.0088	0.0019	2.2e-06	692319
rs1517404	2:63537557	WDPCP	A/T	0.697	-0.0088	0.0019	2.2e-06	692254
rs262502	2:63859723	WDPCP	T/C	0.2917	0.0089	0.0019	2.2e-06	690565
rs7599208	2:63622470	WDPCP	T/C	0.5596	-0.0083	0.0017	2.2e-06	679687
rs2202537	6:100833287	SIM1	A/G	0.3518	0.0084	0.0018	2.3e-06	692533
rs241812	6:100890991	SIM1	A/G	0.6971	0.0088	0.0019	2.3e-06	692311
rs3778040	6:100840380	SIM1	A/G	0.351	0.0084	0.0018	2.3e-06	692597
rs9390366	6:100864938	SIM1	T/G	0.7753	-0.0097	0.0021	2.3e-06	691291
rs6545989	2:63545267	WDPCP	A/G	0.6969	-0.0089	0.0019	2.3e-06	692350
rs7599736	2:63548856	WDPCP	T/C	0.303	0.0088	0.0019	2.3e-06	692305
rs12140679	1:243606691	SDCCAG8	T/G	0.1564	-0.0112	0.0024	2.4e-06	692130
rs10171190	2:63650794	WDPCP	T/C	0.5785	0.0082	0.0017	2.4e-06	689905
rs11675647	2:63528437	WDPCP	C/G	0.6969	-0.0088	0.0019	2.4e-06	692387
rs11684108	2:63514287	WDPCP	C/G	0.6971	-0.0088	0.0019	2.4e-06	692402
rs12713477	2:63514622	WDPCP	T/C	0.3029	0.0088	0.0019	2.4e-06	692402
rs1400687	2:63538766	WDPCP	A/C	0.3031	0.0088	0.0019	2.4e-06	692299
rs4671480	2:63547488	WDPCP	T/G	0.3031	0.0088	0.0019	2.4e-06	692342
rs6545986	2:63525117	WDPCP	A/G	0.303	0.0088	0.0019	2.4e-06	692346
rs10169292	2:63553235	WDPCP	T/G	0.6967	-0.0088	0.0019	2.5e-06	692235
rs10207356	2:63512015	WDPCP	T/C	0.3014	0.0088	0.0019	2.5e-06	692251
rs1400686	2:63542507	WDPCP	A/G	0.6969	-0.0088	0.0019	2.5e-06	692332
rs4671471	2:63513924	WDPCP	T/C	0.6971	-0.0088	0.0019	2.5e-06	692385
rs4671473	2:63515934	WDPCP	T/C	0.6956	-0.0088	0.0019	2.5e-06	692393
rs4671484	2:63554740	WDPCP	T/C	0.3031	0.0088	0.0019	2.5e-06	692114
rs4671506	2:63645034	WDPCP	A/G	0.5689	0.0081	0.0017	2.5e-06	689750
rs6713500	2:63529031	WDPCP	T/G	0.3031	0.0088	0.0019	2.5e-06	692402
rs6724044	2:63515755	WDPCP	T/C	0.697	-0.0088	0.0019	2.5e-06	692320
rs10875914	12:49422094	KMT2D	A/G	0.59	-0.0084	0.0018	2.6e-06	678344
rs10868231	9:87474397	NTRK2	A/G	0.7095	-0.0084	0.0018	2.6e-06	791825
rs9322033	6:100852016	SIM1	T/C	0.2237	0.0096	0.0021	2.6e-06	688321
rs262488	2:63882179	WDPCP	T/C	0.7135	-0.0089	0.0019	2.6e-06	691502
rs262531	2:63904951	WDPCP	A/C	0.2857	0.0089	0.0019	2.6e-06	691301
rs4671470	2:63513913	WDPCP	A/G	0.6971	-0.0088	0.0019	2.6e-06	692384
rs6545991	2:63549063	WDPCP	A/G	0.3031	0.0088	0.0019	2.6e-06	692330
rs6706180	2:63530801	WDPCP	A/G	0.697	-0.0088	0.0019	2.6e-06	692308
rs6725694	2:63510902	WDPCP	C/G	0.6971	-0.0088	0.0019	2.6e-06	692291
rs7558922	2:63548692	WDPCP	A/G	0.3031	0.0088	0.0019	2.6e-06	692336
rs7559137	2:63548868	WDPCP	A/C	0.3031	0.0088	0.0019	2.6e-06	692336
rs1573219	9:87387622	NTRK2	A/G	0.303	-0.0089	0.0019	2.7e-06	685982
rs7038866	9:87387907	NTRK2	A/G	0.3008	-0.0089	0.0019	2.7e-06	684976
rs1517405	2:63515568	WDPCP	T/C	0.6971	-0.0087	0.0019	2.7e-06	692326
rs262537	2:63907331	WDPCP	T/C	0.7145	-0.009	0.0019	2.7e-06	685441
rs6744720	2:63521033	WDPCP	T/G	0.697	-0.0087	0.0019	2.7e-06	692376
rs7606045	2:63826528	WDPCP	T/G	0.2918	0.0088	0.0019	2.7e-06	691182
rs11168839	12:49457635	KMT2D	A/G	0.3963	0.0083	0.0018	2.8e-06	688731
rs2304275	12:49442813	KMT2D	T/C	0.699	-0.0092	0.002	2.8e-06	628516
rs1539676	9:87390167	NTRK2	T/C	0.3008	-0.0089	0.0019	2.8e-06	684536
rs7551067	1:243606579	SDCCAG8	A/T	0.1559	-0.0111	0.0024	2.8e-06	680291
rs9403740	6:100842895	SIM1	T/C	0.35	0.0085	0.0018	2.8e-06	680857
rs12713486	2:63557809	WDPCP	T/C	0.5461	-0.008	0.0017	2.8e-06	691835
rs262506	2:63863022	WDPCP	A/G	0.2881	0.0096	0.002	2.8e-06	527366
rs4671481	2:63547527	WDPCP	A/G	0.3031	0.0087	0.0019	2.8e-06	692319
rs4671495	2:63607943	WDPCP	T/G	0.546	-0.008	0.0017	2.8e-06	692068
rs6708627	2:63543926	WDPCP	A/G	0.3031	0.0087	0.0019	2.8e-06	692350
rs6702894	1:243608642	SDCCAG8	A/G	0.7878	0.0098	0.0021	2.9e-06	691194
rs4671474	2:63516104	WDPCP	A/C	0.6971	-0.0087	0.0019	2.9e-06	692344
rs6734468	2:63530569	WDPCP	A/C	0.303	0.0087	0.0019	2.9e-06	690897
rs1517401	2:63540707	WDPCP	A/G	0.3032	0.0087	0.0019	3e-06	692317
rs166385	2:63888023	WDPCP	A/T	0.7282	-0.0093	0.002	3e-06	683063
rs2421882	2:63556849	WDPCP	T/G	0.5461	-0.008	0.0017	3e-06	691685
rs9390335	6:100830493	SIM1	T/C	0.6486	-0.0083	0.0018	3.1e-06	692051
rs10164844	2:63652403	WDPCP	T/C	0.4138	-0.0081	0.0017	3.1e-06	689923
rs2421885	2:63577041	WDPCP	A/G	0.5464	-0.008	0.0017	3.1e-06	692401
rs2421886	2:63579312	WDPCP	T/C	0.3033	0.0087	0.0019	3.1e-06	691979
rs262470	2:63830559	WDPCP	T/C	0.7118	-0.0095	0.002	3.1e-06	527237
rs6723088	2:63916826	WDPCP	T/C	0.3614	-0.0084	0.0018	3.1e-06	684093
rs2490392	1:243462523	SDCCAG8	A/G	0.8272	0.0108	0.0023	3.2e-06	691026
rs9403711	6:100824183	SIM1	A/G	0.2254	0.0095	0.002	3.2e-06	692606
rs9403718	6:100827450	SIM1	T/C	0.7733	-0.0095	0.002	3.2e-06	692425
rs2176417	2:63578594	WDPCP	C/G	0.6952	-0.0087	0.0019	3.2e-06	691791
rs2421891	2:63652804	WDPCP	T/C	0.4144	-0.0081	0.0017	3.2e-06	681796
rs7561802	2:63562066	WDPCP	T/C	0.6969	-0.0087	0.0019	3.2e-06	691535
rs11691357	2:63561449	WDPCP	A/G	0.3031	0.0087	0.0019	3.3e-06	691868
rs3798499	6:100864829	SIM1	T/C	0.6488	-0.0084	0.0018	3.4e-06	690399
rs11686044	2:63561332	WDPCP	T/G	0.3031	0.0087	0.0019	3.4e-06	691917
rs2176416	2:63590255	WDPCP	A/G	0.3031	0.0087	0.0019	3.4e-06	691596
rs2699389	2:63494931	WDPCP	A/G	0.2893	0.0095	0.002	3.4e-06	535537
rs2951192	2:63502533	WDPCP	A/T	0.2894	0.0095	0.002	3.4e-06	528742
rs6545997	2:63562146	WDPCP	A/C	0.3067	0.0087	0.0019	3.4e-06	691913
rs6717060	2:63568608	WDPCP	A/G	0.6953	-0.0087	0.0019	3.4e-06	691731
rs10209490	2:63651996	WDPCP	A/G	0.4147	-0.008	0.0017	3.5e-06	690141
rs1878507	2:63573411	WDPCP	T/C	0.5465	-0.008	0.0017	3.5e-06	691640
rs4671496	2:63607980	WDPCP	C/G	0.546	-0.008	0.0017	3.5e-06	692012
rs1100806	15:23942935	NDN	A/G	0.5676	-0.0089	0.0019	3.6e-06	512067
rs11398	6:57053947	RAB23	T/C	0.8428	-0.0109	0.0023	3.6e-06	677725
rs1517409	2:63575082	WDPCP	A/G	0.3037	0.0086	0.0019	3.6e-06	691907
rs2421892	2:63653103	WDPCP	C/G	0.5859	0.0081	0.0017	3.6e-06	690007
rs6718198	2:63584129	WDPCP	T/C	0.5465	-0.008	0.0017	3.6e-06	692022
rs1546393	6:100849730	SIM1	T/C	0.3502	0.0084	0.0018	3.7e-06	680117
rs2117029	12:49408440	KMT2D	A/T	0.6047	-0.0082	0.0018	3.8e-06	688544
rs12988024	2:63585304	WDPCP	A/C	0.5464	-0.0079	0.0017	3.8e-06	692022
rs12144227	1:243604964	SDCCAG8	C/G	0.1559	-0.0111	0.0024	3.9e-06	680407
rs6545988	2:63542732	WDPCP	A/C	0.3083	0.0087	0.0019	3.9e-06	685240
rs6546002	2:63593829	WDPCP	A/C	0.3052	0.0086	0.0019	3.9e-06	690361
rs941444	17:17693891	RAI1	C/G	0.3887	-0.0083	0.0018	4e-06	691985
rs3827351	22:37157240	IFT27	A/C	0.7301	0.009	0.002	4.2e-06	691952
rs2699390	2:63494848	WDPCP	T/C	0.7107	-0.0094	0.002	4.2e-06	528576
rs262521	2:63892485	WDPCP	A/G	0.7279	-0.0088	0.0019	4.3e-06	691892
rs6559829	9:87393013	NTRK2	T/C	0.6941	0.0087	0.0019	4.4e-06	684380
rs11125967	2:63584792	WDPCP	A/G	0.3032	0.0086	0.0019	4.4e-06	691589
rs262508	2:63885280	WDPCP	C/G	0.7279	-0.0089	0.0019	4.4e-06	690649
rs2699391	2:63494107	WDPCP	T/C	0.2878	0.0094	0.002	4.4e-06	528501
rs4671061	2:63653816	WDPCP	T/C	0.414	-0.008	0.0017	4.4e-06	689943
rs4671494	2:63604998	WDPCP	T/C	0.695	-0.0086	0.0019	4.4e-06	690210
rs6546001	2:63593819	WDPCP	A/G	0.3037	0.0086	0.0019	4.5e-06	690289
rs1048015	22:37163080	IFT27	T/C	0.731	0.009	0.002	4.6e-06	692264
rs1475995	22:37159393	IFT27	T/C	0.7313	0.009	0.002	4.6e-06	692191
rs10209822	2:63572447	WDPCP	T/G	0.3032	0.0086	0.0019	4.6e-06	691813
rs1022353	2:63652198	WDPCP	T/G	0.4143	-0.008	0.0017	4.6e-06	690161
rs2176418	2:63575792	WDPCP	T/C	0.3033	0.0085	0.0019	4.6e-06	691866
rs262479	2:63872479	WDPCP	T/C	0.7136	-0.0094	0.002	4.6e-06	527336
rs6731136	2:63647909	WDPCP	T/C	0.4143	-0.008	0.0017	4.6e-06	690053
rs2422011	2:63774989	WDPCP	A/G	0.2847	0.0084	0.0018	4.8e-06	777710
rs11894445	2:63592348	WDPCP	A/G	0.3037	0.0085	0.0019	4.9e-06	690325
rs2090479	2:63529861	WDPCP	T/G	0.3031	0.0085	0.0019	4.9e-06	692428
rs13011799	2:63597250	WDPCP	T/C	0.3036	0.0085	0.0019	5e-06	690333
rs7558796	2:63597108	WDPCP	A/T	0.6964	-0.0085	0.0019	5e-06	690344
rs932172	2:63602897	WDPCP	T/C	0.3036	0.0085	0.0019	5e-06	690378
rs2421887	2:63606219	WDPCP	T/C	0.3035	0.0085	0.0019	5.1e-06	690362
rs7756421	6:57034009	RAB23	A/G	0.8553	-0.0111	0.0024	5.2e-06	692235
rs908622	2:63579685	WDPCP	T/C	0.3049	0.0085	0.0019	5.2e-06	691686
rs10209140	2:63922369	WDPCP	A/G	0.3623	-0.0081	0.0018	5.3e-06	692415
rs4671479	2:63545598	WDPCP	A/T	0.3031	0.0091	0.002	5.3e-06	536243
rs7355671	2:63592499	WDPCP	T/C	0.5462	-0.0079	0.0017	5.3e-06	686208
rs2292795	2:63605430	WDPCP	A/G	0.3036	0.0085	0.0019	5.4e-06	690238
rs2901580	2:63606274	WDPCP	T/C	0.6965	-0.0085	0.0019	5.4e-06	690352
rs9403728	6:100831568	SIM1	A/C	0.6484	-0.0082	0.0018	5.5e-06	680830
rs10167849	2:63598639	WDPCP	A/G	0.5437	-0.0078	0.0017	5.5e-06	692145
rs12618974	2:63607443	WDPCP	T/C	0.3035	0.0085	0.0019	5.5e-06	690260
rs17060480	6:100836636	SIM1	A/T	0.7745	-0.0093	0.002	5.6e-06	688837
rs2295596	6:100834674	SIM1	T/C	0.2254	0.0093	0.002	5.6e-06	688816
rs11883730	2:63592230	WDPCP	T/G	0.6948	-0.0085	0.0019	5.6e-06	690386
rs1348806	2:63895884	WDPCP	A/T	0.272	0.0087	0.0019	5.6e-06	691983
rs2121353	2:63899330	WDPCP	T/C	0.728	-0.0087	0.0019	5.6e-06	691951
rs2592386	2:63894064	WDPCP	A/G	0.272	0.0087	0.0019	5.6e-06	692029
rs7571697	2:63597605	WDPCP	A/G	0.3036	0.0085	0.0019	5.6e-06	690330
rs3798511	6:100852753	SIM1	T/C	0.92019	-0.0143	0.0031	5.7e-06	692149
rs262510	2:63886712	WDPCP	A/C	0.2721	0.0087	0.0019	5.8e-06	691833
rs2292794	2:63605772	WDPCP	A/G	0.3035	0.0085	0.0019	5.9e-06	690337
rs908621	2:63606042	WDPCP	T/C	0.6965	-0.0085	0.0019	5.9e-06	690337
rs5750307	22:37170977	IFT27	T/C	0.7309	0.0089	0.002	6e-06	691960
rs4840130	6:100833142	SIM1	T/C	0.2254	0.0093	0.002	6e-06	688837
rs4671488	2:63567514	WDPCP	T/C	0.6928	-0.0091	0.002	6e-06	527753
rs7355552	2:63594650	WDPCP	T/C	0.5448	-0.0078	0.0017	6.2e-06	692124
rs13028443	2:63603717	WDPCP	T/C	0.5444	-0.0078	0.0017	6.3e-06	692076
rs9386123	6:100824140	SIM1	T/C	0.2254	0.0092	0.002	6.4e-06	688959
rs9390332	6:100830259	SIM1	A/T	0.7746	-0.0092	0.002	6.4e-06	688802
rs171902	2:63903236	WDPCP	T/C	0.728	-0.0087	0.0019	6.4e-06	691836
rs5750306	22:37170915	IFT27	T/C	0.7305	0.0088	0.002	6.5e-06	691931
rs129336	22:37155457	IFT27	A/C	0.268	-0.0088	0.002	6.6e-06	692642
rs9376947	6:100825490	SIM1	A/G	0.7743	-0.0092	0.002	6.6e-06	688890
rs1922421	2:63592792	WDPCP	A/G	0.6932	-0.0084	0.0019	6.6e-06	690177
rs4671507	2:63645377	WDPCP	C/G	0.5816	0.0078	0.0017	6.6e-06	690580
rs12145833	1:243483754	SDCCAG8	T/G	0.8435	0.0108	0.0024	6.7e-06	690697
rs1506081	6:100825035	SIM1	A/G	0.6483	-0.0081	0.0018	6.7e-06	680700
rs3778036	6:100844105	SIM1	T/C	0.92025	-0.0141	0.0031	6.7e-06	692150
rs4578846	2:63554859	WDPCP	T/C	0.3031	0.0091	0.002	6.7e-06	528796
rs1506084	6:100813188	SIM1	A/G	0.3582	0.008	0.0018	6.8e-06	686580
rs1212171	9:87282527	NTRK2	T/C	0.5689	0.0078	0.0017	6.9e-06	690796
rs6723875	2:63911500	WDPCP	T/C	0.2949	-0.0085	0.0019	6.9e-06	683616
rs11687234	2:63634407	WDPCP	A/C	0.5816	0.0078	0.0017	7.1e-06	691990
rs1187353	9:87293253	NTRK2	A/G	0.4323	-0.0078	0.0017	7.2e-06	687118
rs12618946	2:63353041	WDPCP	A/G	0.3401	-0.0082	0.0018	7.2e-06	683987
rs262478	2:63872386	WDPCP	T/C	0.2853	0.0092	0.002	7.2e-06	527247
rs12713491	2:63604320	WDPCP	A/C	0.5444	-0.0077	0.0017	7.3e-06	691993
rs4840129	6:100826119	SIM1	T/C	0.3546	0.0081	0.0018	7.4e-06	680499
rs12713490	2:63603463	WDPCP	A/G	0.5443	-0.0077	0.0017	7.4e-06	691998
rs1659414	9:87270571	NTRK2	T/C	0.4324	-0.0078	0.0017	7.5e-06	690284
rs4313961	2:63554849	WDPCP	T/C	0.6956	-0.0091	0.002	7.6e-06	525103
rs993315	9:87287721	NTRK2	T/C	0.4305	-0.0077	0.0017	7.7e-06	691746
rs9403723	6:100830435	SIM1	C/G	0.6482	-0.0081	0.0018	7.7e-06	680738
rs1829259	2:63590646	WDPCP	T/C	0.5465	-0.0077	0.0017	7.7e-06	690720
rs12478262	2:63626556	WDPCP	T/G	0.4183	-0.0077	0.0017	7.8e-06	691723
rs17060562	6:100870786	SIM1	T/C	0.96632	-0.0215	0.0048	8e-06	690374
rs1187349	9:87295571	NTRK2	A/G	0.4329	-0.0078	0.0017	8.1e-06	685235
rs1209068	9:87340518	NTRK2	T/C	0.1719	-0.0103	0.0023	8.1e-06	688082
rs932171	2:63602942	WDPCP	A/G	0.3051	0.0083	0.0019	8.1e-06	690342
rs7130131	11:27662826	BDNF	T/C	0.94136	-0.0152	0.0034	8.2e-06	782822
rs171901	2:63901700	WDPCP	C/G	0.272	0.0086	0.0019	8.2e-06	691544
rs4671472	2:63515912	WDPCP	A/C	0.6971	-0.009	0.002	8.4e-06	529059
rs13409031	2:63645846	WDPCP	A/G	0.4111	-0.0077	0.0017	8.6e-06	690833
rs12625436	20:57445213	GNAS	A/G	0.3944	0.008	0.0018	8.7e-06	680762
rs1201363	9:87268759	NTRK2	T/C	0.5624	0.0077	0.0017	8.8e-06	689673
rs1348804	2:63895672	WDPCP	T/C	0.6968	-0.0087	0.0019	8.8e-06	636951
rs1543692	9:87269223	NTRK2	A/G	0.4348	-0.0077	0.0017	8.9e-06	689737
rs10182596	2:63550192	WDPCP	A/G	0.3031	0.009	0.002	9e-06	528921
rs1829261	2:63587157	WDPCP	A/G	0.306	0.0083	0.0019	9e-06	691218
rs1187329	9:87289280	NTRK2	A/G	0.4302	-0.0077	0.0017	9.1e-06	691969
rs17060460	6:100827834	SIM1	A/G	0.7754	-0.0091	0.0021	9.1e-06	687333
rs2138791	2:63654724	WDPCP	C/G	0.4106	-0.0077	0.0017	9.1e-06	690093
rs1547226	6:57057183	RAB23	T/C	0.18	0.0102	0.0023	9.3e-06	685694
rs3818717	17:17707105	RAI1	T/C	0.4259	-0.0078	0.0018	9.4e-06	683243
rs262536	2:63906926	WDPCP	T/C	0.2719	0.0085	0.0019	9.5e-06	689577
rs4671522	2:63844917	WDPCP	A/C	0.7554	0.0088	0.002	9.6e-06	691287
rs6741817	2:63602975	WDPCP	A/G	0.3051	0.0083	0.0019	9.6e-06	690367
rs3778038	6:100841229	SIM1	T/G	0.3517	0.008	0.0018	9.7e-06	679914
rs2178678	2:63646009	WDPCP	A/T	0.5892	0.0077	0.0017	9.9e-06	690298
rs7927728	11:27667472	BDNF	A/G	0.05794	0.015	0.0034	1e-05	783103
rs2802727	1:243483326	SDCCAG8	T/C	0.843	0.0106	0.0024	1e-05	691230
rs262527	2:63900292	WDPCP	C/G	0.728	-0.0081	0.0018	1e-05	783560
rs12493471	3:45951678	LZTFL1	T/C	0.3534	-0.0081	0.0018	1.1e-05	672985
rs1722793	15:23949665	NDN	T/C	0.6207	-0.0081	0.0018	1.1e-05	672339
rs12945601	17:17653411	RAI1	T/C	0.4004	-0.0078	0.0018	1.1e-05	685392
rs10926986	1:243467611	SDCCAG8	T/G	0.1567	-0.0105	0.0024	1.1e-05	691322
rs1568174	2:63625608	WDPCP	A/C	0.5814	0.0076	0.0017	1.1e-05	691396
rs262528	2:63903367	WDPCP	T/C	0.728	-0.0085	0.0019	1.1e-05	691815
rs6546003	2:63625819	WDPCP	T/C	0.4183	-0.0076	0.0017	1.1e-05	691433
rs10926984	1:243462153	SDCCAG8	T/G	0.8434	0.0105	0.0024	1.2e-05	691232
rs12470121	2:63633443	WDPCP	A/G	0.4187	-0.0071	0.0016	1.2e-05	795505
rs6736411	2:63674060	WDPCP	A/G	0.714	-0.0085	0.0019	1.2e-05	670097
rs2901581	2:63630117	WDPCP	T/C	0.5848	0.0075	0.0017	1.4e-05	691757
rs12470478	2:63769308	WDPCP	A/G	0.2389	-0.0086	0.002	1.5e-05	691012
rs8135284	22:37182681	IFT27	T/C	0.7284	0.0085	0.002	1.6e-05	689272
rs1471962	3:45949187	LZTFL1	C/G	0.1722	0.0102	0.0024	1.6e-05	664262
rs1147198	9:87275348	NTRK2	T/G	0.7703	0.0087	0.002	1.6e-05	692431
rs6559823	9:87348215	NTRK2	A/G	0.2598	-0.0085	0.002	1.6e-05	691209
rs12140431	1:243596284	SDCCAG8	A/G	0.1524	-0.0105	0.0024	1.6e-05	770204
rs1881235	11:8103991	TUB	A/G	0.96761	-0.0191	0.0044	1.6e-05	677528
rs2278718	2:63815801	WDPCP	A/C	0.7535	0.0085	0.002	1.6e-05	692439
rs11649804	17:17696755	RAI1	A/C	0.3032	-0.0082	0.0019	1.7e-05	692243
rs2421862	2:63401973	WDPCP	A/G	0.2127	0.009	0.0021	1.7e-05	689633
rs12518414	5:42722078	GHR	A/G	0.2771	0.0082	0.0019	1.9e-05	692079
rs1187327	9:87288540	NTRK2	T/C	0.4305	-0.0074	0.0017	1.9e-05	692294
rs6116750	20:5303842	PROKR2	T/C	0.5744	0.0076	0.0018	1.9e-05	678450
rs12119001	1:243601935	SDCCAG8	T/C	0.1679	-0.0098	0.0023	1.9e-05	692214
rs10496102	2:63731239	WDPCP	T/C	0.7539	0.0085	0.002	1.9e-05	691306
rs1356390	2:63669625	WDPCP	T/C	0.2859	0.0083	0.0019	1.9e-05	669854
rs6546005	2:63672071	WDPCP	A/G	0.7152	-0.0083	0.0019	1.9e-05	670242
rs12049124	1:243598993	SDCCAG8	T/C	0.1714	-0.0098	0.0023	2e-05	691556
rs2783963	1:243501583	SDCCAG8	A/G	0.1589	-0.0107	0.0025	2e-05	684717
rs1187363	9:87337920	NTRK2	T/C	0.1715	-0.01	0.0023	2.1e-05	686514
rs6685276	1:243603132	SDCCAG8	A/G	0.8313	0.0098	0.0023	2.1e-05	692173
rs3798513	6:100852179	SIM1	A/C	0.92031	-0.0134	0.0032	2.1e-05	680262
rs6741298	2:63926197	WDPCP	T/C	0.5447	-0.0073	0.0017	2.1e-05	687925
rs7717863	5:42741757	GHR	A/G	0.7226	-0.0081	0.0019	2.2e-05	692148
rs3817588	2:27731212	IFT172	T/C	0.8061	-0.0089	0.0021	2.2e-05	783398
rs1443440	9:87406168	NTRK2	T/C	0.7356	0.0085	0.002	2.2e-05	675053
rs1662696	9:87396495	NTRK2	T/C	0.2581	-0.0085	0.002	2.2e-05	682377
rs7568224	2:63390996	WDPCP	A/G	0.7861	-0.0089	0.0021	2.2e-05	688158
rs10116453	9:87363201	NTRK2	A/T	0.2598	-0.0084	0.002	2.3e-05	689871
rs1147193	9:87272615	NTRK2	T/C	0.7708	0.0086	0.002	2.3e-05	692375
rs1307279	9:87281307	NTRK2	T/C	0.765	0.0086	0.002	2.3e-05	691281
rs2295595	6:100834063	SIM1	C/G	0.08062	0.0133	0.0031	2.3e-05	691302
rs4671501	2:63631889	WDPCP	A/C	0.5805	0.0075	0.0018	2.3e-05	637342
rs7725961	5:42723965	GHR	A/G	0.7229	-0.0081	0.0019	2.4e-05	691602
rs13290917	9:87321367	NTRK2	A/G	0.03543	0.0208	0.0049	2.4e-05	666243
rs6702982	1:243608667	SDCCAG8	A/G	0.8258	0.0097	0.0023	2.4e-05	691915
rs3798515	6:100839294	SIM1	T/C	0.91926	-0.0132	0.0031	2.4e-05	691526
rs1881837	15:93465187	CHD2	A/G	0.8336	-0.0099	0.0023	2.5e-05	690734
rs2263636	2:63495365	WDPCP	A/C	0.2765	0.0087	0.0021	2.5e-05	531425
rs7652331	3:45962752	LZTFL1	T/C	0.3462	-0.0075	0.0018	2.6e-05	691348
rs2292793	2:63661280	WDPCP	A/G	0.2842	0.0077	0.0018	2.6e-05	768899
rs7174740	15:93531714	CHD2	T/C	0.7467	-0.0084	0.002	2.7e-05	690217
rs6665625	1:243608833	SDCCAG8	C/G	0.1721	-0.0096	0.0023	2.7e-05	680446
rs12713497	2:63926545	WDPCP	T/C	0.4551	0.0072	0.0017	2.7e-05	688238
rs4671528	2:63924709	WDPCP	T/G	0.5434	-0.0073	0.0017	2.7e-05	684349
rs12479894	20:57442694	GNAS	A/G	0.97205	-0.0218	0.0052	2.8e-05	689394
rs13002109	2:63346702	WDPCP	A/C	0.5112	-0.0072	0.0017	2.8e-05	684186
rs17408652	2:63390490	WDPCP	T/G	0.7846	-0.0088	0.0021	2.8e-05	688089
rs6741584	2:63926459	WDPCP	T/C	0.5449	-0.0072	0.0017	2.8e-05	688261
rs1406713	15:93461263	CHD2	C/G	0.1957	0.0092	0.0022	2.9e-05	688196
rs13431765	2:63417729	WDPCP	T/G	0.7721	-0.0085	0.002	2.9e-05	691629
rs7605319	2:63423495	WDPCP	T/C	0.2132	0.0087	0.0021	2.9e-05	691630
rs7608470	2:63691478	WDPCP	T/C	0.2846	0.0081	0.0019	3e-05	669875
rs3800018	6:57069606	RAB23	T/C	0.8528	-0.0102	0.0024	3.1e-05	688749
rs4623938	11:8109415	TUB	T/C	0.03221	0.0186	0.0045	3.1e-05	678267
rs17619354	2:63919765	WDPCP	A/G	0.2544	-0.0082	0.002	3.1e-05	684992
rs2053359	15:93540997	CHD2	T/C	0.7444	-0.0083	0.002	3.2e-05	690543
rs1659409	9:87318287	NTRK2	A/G	0.4867	-0.0071	0.0017	3.2e-05	690914
rs6546023	2:63919883	WDPCP	T/C	0.743	0.0082	0.002	3.3e-05	685043
rs11074121	15:93521604	CHD2	A/G	0.1705	0.0096	0.0023	3.4e-05	690102
rs3798500	6:100862427	SIM1	T/C	0.91879	-0.013	0.0031	3.4e-05	692154
rs1540858	11:8105759	TUB	A/G	0.96428	-0.0183	0.0044	3.4e-05	672550
rs262494	2:63845484	WDPCP	A/G	0.7468	-0.0082	0.002	3.4e-05	689060
rs6497012	15:93519107	CHD2	C/G	0.1705	0.0096	0.0023	3.6e-05	690100
rs139883	22:38369027	SOX10	T/C	0.6266	-0.0074	0.0018	3.6e-05	692028
rs17554675	2:63919971	WDPCP	A/G	0.2536	-0.0081	0.002	3.6e-05	685027
rs4567921	2:63847114	WDPCP	A/G	0.244	-0.0089	0.0021	3.6e-05	528346
rs139887	22:38371396	SOX10	C/G	0.6266	-0.0073	0.0018	3.7e-05	691849
rs10203263	2:63454401	WDPCP	A/C	0.2267	0.0084	0.002	3.7e-05	692415
rs12900461	15:93552656	CHD2	T/C	0.8283	-0.0095	0.0023	3.8e-05	692407
rs2033847	15:93545831	CHD2	T/G	0.8292	-0.0096	0.0023	3.8e-05	691394
rs1364024	5:42724913	GHR	T/C	0.7224	-0.0081	0.002	3.8e-05	682760
rs2009667	22:37171611	IFT27	A/G	0.4495	-0.0074	0.0018	3.8e-05	674064
rs4244601	17:17625318	RAI1	A/G	0.1359	-0.0103	0.0025	3.8e-05	795255
rs11074122	15:93521651	CHD2	T/G	0.171	0.0096	0.0023	3.9e-05	690102
rs12915582	15:93552330	CHD2	T/C	0.8288	-0.0095	0.0023	3.9e-05	691945
rs2272458	15:93527843	CHD2	A/G	0.7442	-0.0082	0.002	3.9e-05	690231
rs1439047	9:87327918	NTRK2	A/G	0.4913	-0.0071	0.0017	3.9e-05	691096
rs4877880	9:87392708	NTRK2	A/G	0.2616	-0.0081	0.002	3.9e-05	685859
rs720856	17:17645951	RAI1	C/G	0.7554	0.0086	0.0021	3.9e-05	684368
rs139866	22:38354684	SOX10	T/C	0.6284	-0.0073	0.0018	3.9e-05	691630
rs10486527	7:33380673	BBS9	T/C	0.6938	0.0073	0.0018	4e-05	792113
rs1470071	15:93506792	CHD2	T/C	0.1669	0.0096	0.0023	4e-05	689475
rs7173849	15:93542000	CHD2	C/G	0.1708	0.0095	0.0023	4e-05	691304
rs1778929	9:87322540	NTRK2	T/C	0.4868	-0.0071	0.0017	4e-05	691103
rs2579371	9:87334068	NTRK2	T/C	0.5087	0.0071	0.0017	4.1e-05	689520
rs11868035	17:17715101	RAI1	A/G	0.3044	-0.0078	0.0019	4.1e-05	684920
rs17060534	6:100862051	SIM1	A/G	0.08536	0.0128	0.0031	4.1e-05	692180
rs6026563	20:57433342	GNAS	A/G	0.97159	-0.0212	0.0052	4.2e-05	683958
rs1025768	15:93517214	CHD2	A/G	0.8289	-0.0095	0.0023	4.3e-05	690003
rs16888392	6:57076552	RAB23	A/G	0.1455	0.01	0.0024	4.4e-05	680749
rs7747929	6:100871488	SIM1	T/C	0.6668	-0.0075	0.0018	4.4e-05	690774
rs1371391	15:93551800	CHD2	A/G	0.8288	-0.0094	0.0023	4.5e-05	691534
rs139898	22:38399979	SOX10	A/G	0.3782	0.0073	0.0018	4.6e-05	690556
rs11074124	15:93536666	CHD2	A/G	0.747	-0.0081	0.002	4.8e-05	690279
rs11856160	15:93452846	CHD2	A/G	0.8406	-0.0097	0.0024	4.8e-05	686463
rs10081630	9:87328898	NTRK2	A/T	0.03455	0.0187	0.0046	4.9e-05	691161
rs1187326	9:87285915	NTRK2	T/C	0.772	0.0085	0.0021	4.9e-05	637456
rs13417792	2:63447200	WDPCP	T/G	0.213	0.0085	0.0021	4.9e-05	690908
rs196123	2:63841712	WDPCP	T/C	0.2527	0.008	0.002	4.9e-05	689781
rs139879	22:38364552	SOX10	T/C	0.371	0.0072	0.0018	5e-05	692544
rs1138908	12:49402299	KMT2D	C/G	0.3955	0.0078	0.0019	5.1e-05	527852
rs4403617	1:243611266	SDCCAG8	A/G	0.1626	-0.0098	0.0024	5.1e-05	674649
rs139865	22:38353932	SOX10	C/G	0.3717	0.0073	0.0018	5.3e-05	691184
rs139891	22:38387914	SOX10	T/G	0.6214	-0.0072	0.0018	5.3e-05	691379
rs6441934	3:45962802	LZTFL1	T/C	0.208	-0.0086	0.0021	5.4e-05	688033
rs17087704	9:87405751	NTRK2	A/T	0.96428	-0.0188	0.0047	5.4e-05	674616
rs1778934	9:87324622	NTRK2	A/G	0.5081	0.0069	0.0017	5.5e-05	691011
rs4777534	15:73050222	BBS4	T/C	0.2392	-0.0081	0.002	5.6e-05	691195
rs11656775	17:17654319	RAI1	A/G	0.3268	-0.0071	0.0018	5.6e-05	788532
rs139884	22:38369976	SOX10	A/G	0.3712	0.0072	0.0018	5.6e-05	691965
rs11639256	15:93528473	CHD2	T/C	0.2529	0.0081	0.002	5.7e-05	684246
rs1881237	11:8110479	TUB	A/G	0.96574	-0.0177	0.0044	5.7e-05	678144
rs1439620	15:93429646	CHD2	A/G	0.319	0.0071	0.0018	5.8e-05	789595
rs6497014	15:93544696	CHD2	T/C	0.2528	0.008	0.002	6e-05	690523
rs7717985	5:42741635	GHR	A/G	0.3005	0.0076	0.0019	6e-05	692053
rs13293362	9:87325380	NTRK2	T/C	0.0335	0.0187	0.0047	6e-05	690670
rs7180285	15:93499385	CHD2	A/G	0.1659	0.0094	0.0023	6.1e-05	689075
rs2191030	3:45910946	LZTFL1	T/C	0.2246	-0.0084	0.0021	6.1e-05	677073
rs6026562	20:57432211	GNAS	T/C	0.97159	-0.0207	0.0052	6.2e-05	684105
rs3798504	6:100858936	SIM1	A/T	0.91949	-0.0126	0.0031	6.5e-05	680473
rs1971456	20:5304961	PROKR2	T/C	0.4282	-0.0071	0.0018	6.6e-05	674843
rs4777755	15:93510603	CHD2	A/G	0.1698	0.0093	0.0023	7e-05	689339
rs4866949	5:42718422	GHR	T/C	0.6995	-0.0075	0.0019	7e-05	691956
rs7708223	5:42723898	GHR	T/C	0.6996	-0.0075	0.0019	7.1e-05	691944
rs2123010	5:36921325	NIPBL	T/C	0.8738	0.0105	0.0026	7.1e-05	691443
rs139893	22:38393608	SOX10	A/G	0.6235	-0.0071	0.0018	7.2e-05	690515
rs1488373	3:45957689	LZTFL1	T/C	0.7514	0.0078	0.002	7.3e-05	692263
rs12900800	15:93512678	CHD2	A/G	0.7508	-0.008	0.002	7.4e-05	688611
rs13293356	9:87333948	NTRK2	A/T	0.9665	-0.0185	0.0047	7.4e-05	690606
rs4877286	9:87343940	NTRK2	A/G	0.03397	0.0186	0.0047	7.4e-05	688615
rs3798498	6:100878267	SIM1	T/C	0.6034	0.0071	0.0018	7.4e-05	679561
rs328300	8:38344499	FGFR1	T/G	0.5157	0.0069	0.0017	7.5e-05	680608
rs13422328	2:63466177	WDPCP	A/C	0.7715	-0.0081	0.0021	7.5e-05	690922
rs262491	2:63841113	WDPCP	T/C	0.2526	0.0078	0.002	7.7e-05	683222
rs12233949	5:42607461	GHR	C/G	0.2946	0.0072	0.0018	7.8e-05	783117
rs7725776	5:42723756	GHR	T/C	0.3004	0.0074	0.0019	7.8e-05	691938
rs3734357	6:100868492	SIM1	A/T	0.6587	-0.0072	0.0018	7.9e-05	690621
rs11041737	11:8111853	TUB	A/G	0.02941	0.0179	0.0045	7.9e-05	671605
rs17618390	2:63831325	WDPCP	C/G	0.731	0.0076	0.0019	7.9e-05	692112
rs17087580	9:87347756	NTRK2	T/C	0.96399	-0.0183	0.0046	8e-05	688951
rs1889018	17:17734740	RAI1	A/G	0.632	0.0071	0.0018	8e-05	686288
rs12187996	5:42717610	GHR	T/C	0.3004	0.0074	0.0019	8.1e-05	691509
rs139897	22:38399098	SOX10	A/G	0.3766	0.007	0.0018	8.6e-05	690577
rs3778035	6:100868009	SIM1	T/C	0.92002	-0.0122	0.0031	8.9e-05	691258
rs4671509	2:63686004	WDPCP	A/G	0.7156	-0.0082	0.0021	8.9e-05	512952
rs9810934	3:45954352	LZTFL1	A/G	0.2454	-0.0078	0.002	9e-05	692542
rs139892	22:38388203	SOX10	A/G	0.623	-0.007	0.0018	9.1e-05	691649
rs2168274	2:63918988	WDPCP	A/T	0.5457	-0.0068	0.0017	9.1e-05	681726
rs9902941	17:17733760	RAI1	T/C	0.6338	0.0071	0.0018	9.2e-05	686045
rs139895	22:38397034	SOX10	A/G	0.623	-0.007	0.0018	9.3e-05	690879
rs84770	22:38390128	SOX10	T/G	0.3766	0.0069	0.0018	9.6e-05	691034
rs6718609	2:63459809	WDPCP	T/G	0.7722	-0.008	0.0021	9.7e-05	691179
rs7618618	3:45963497	LZTFL1	T/G	0.7595	0.0077	0.002	9.8e-05	685541
rs1860601	7:33484507	BBS9	T/G	0.7423	0.0077	0.002	0.0001	688358
rs1532070	3:45970842	LZTFL1	C/G	0.755	0.0077	0.002	0.0001	691547
rs11654081	17:17708129	RAI1	T/C	0.3651	-0.0071	0.0018	0.0001	685547
rs17408841	2:63397974	WDPCP	A/G	0.7732	-0.0079	0.002	0.0001	688381
rs8026638	15:93511848	CHD2	T/C	0.1669	0.0094	0.0024	0.00011	676880
rs10093843	8:38334038	FGFR1	T/C	0.1362	-0.0099	0.0026	0.00011	688796
rs7012413	8:38317398	FGFR1	T/C	0.3045	0.0073	0.0019	0.00011	692573
rs10512153	9:87371365	NTRK2	T/G	0.03397	0.0183	0.0047	0.00011	686551
rs7039299	9:87350878	NTRK2	A/G	0.96387	-0.0179	0.0046	0.00011	688964
rs9899634	17:17727943	RAI1	A/T	0.6335	0.007	0.0018	0.00011	685631
rs2910871	5:42734622	GHR	A/C	0.3114	0.0072	0.0019	0.00012	691851
rs241816	6:100879651	SIM1	T/C	0.6525	0.007	0.0018	0.00012	691277
rs262534	2:63906375	WDPCP	A/T	0.3354	0.007	0.0018	0.00012	691231
rs11982012	7:33377472	BBS9	T/C	0.6926	0.0072	0.0019	0.00013	688536
rs1862628	5:42723128	GHR	T/C	0.6879	-0.0072	0.0019	0.00013	691937
rs7130	3:45959515	LZTFL1	A/T	0.2419	-0.0076	0.002	0.00013	692173
rs12654646	5:37038232	NIPBL	T/C	0.1221	-0.0102	0.0027	0.00013	691016
rs12057045	9:87450224	NTRK2	A/T	0.7692	-0.0079	0.0021	0.00013	675550
rs17326762	9:87357451	NTRK2	T/C	0.03397	0.018	0.0047	0.00013	688473
rs8066560	17:17728043	RAI1	A/G	0.364	-0.0069	0.0018	0.00013	685639
rs12713494	2:63698162	WDPCP	T/G	0.7122	-0.0074	0.0019	0.00013	669763
rs13009169	2:63405218	WDPCP	A/G	0.2837	-0.0073	0.0019	0.00013	687797
rs6462471	7:33377961	BBS9	A/G	0.3295	-0.007	0.0018	0.00014	687574
rs17379500	9:87346520	NTRK2	A/C	0.03397	0.0179	0.0047	0.00014	676594
rs1891979	9:87365866	NTRK2	A/T	0.96603	-0.018	0.0047	0.00014	688455
rs3758316	9:87282568	NTRK2	A/G	0.96656	-0.0178	0.0047	0.00014	678906
rs4877881	9:87405604	NTRK2	A/C	0.96375	-0.0178	0.0047	0.00014	687703
rs2350976	17:17708529	RAI1	A/G	0.3701	-0.0071	0.0019	0.00014	630739
rs1345825	5:42724518	GHR	A/C	0.6883	-0.0071	0.0019	0.00015	691903
rs1047444	3:45960079	LZTFL1	A/C	0.7573	0.0075	0.002	0.00015	692172
rs1488374	3:45961842	LZTFL1	T/C	0.7573	0.0075	0.002	0.00015	691958
rs12552381	9:87402990	NTRK2	T/C	0.96387	-0.0177	0.0047	0.00015	676371
rs12552425	9:87403399	NTRK2	T/C	0.96387	-0.0177	0.0047	0.00015	676368
rs12555159	9:87394832	NTRK2	A/G	0.03613	0.0176	0.0047	0.00015	676528
rs2889962	9:87362039	NTRK2	A/G	0.96375	-0.0176	0.0046	0.00015	684248
rs4925114	17:17711270	RAI1	A/G	0.3651	-0.007	0.0018	0.00015	683447
rs10168461	2:63917221	WDPCP	A/G	0.4535	0.0066	0.0017	0.00015	682769
rs17432775	2:63466463	WDPCP	T/C	0.2274	0.0078	0.0021	0.00015	690907
rs1850984	2:63464942	WDPCP	A/G	0.2275	0.0077	0.002	0.00015	691090
rs881300	8:38332298	FGFR1	A/C	0.8639	0.009	0.0024	0.00017	785665
rs6026546	20:57397994	GNAS	T/C	0.97047	-0.019	0.0051	0.00017	689518
rs13292400	9:87397008	NTRK2	A/C	0.03607	0.0176	0.0047	0.00017	676407
rs17080621	9:87398104	NTRK2	A/G	0.03613	0.0176	0.0047	0.00017	676418
rs17087628	9:87386499	NTRK2	A/G	0.96363	-0.0176	0.0047	0.00017	688705
rs1778912	9:87307434	NTRK2	A/G	0.5337	0.0065	0.0017	0.00017	691059
rs4925109	17:17661802	RAI1	A/G	0.3196	-0.0071	0.0019	0.00017	685849
rs13294616	9:87267100	NTRK2	T/C	0.0335	0.0175	0.0047	0.00018	678834
rs13027594	2:63362468	WDPCP	A/G	0.362	-0.0068	0.0018	0.00018	683256
rs12591728	15:72973268	BBS4	T/G	0.1061	-0.0106	0.0028	0.00019	681166
rs1371390	15:93496874	CHD2	T/C	0.8001	-0.0082	0.0022	0.00019	687602
rs1187350	9:87295237	NTRK2	A/G	0.5336	0.0064	0.0017	0.00019	688463
rs12555182	9:87395111	NTRK2	C/G	0.96416	-0.0174	0.0047	0.00019	688418
rs13287600	9:87395778	NTRK2	T/C	0.96416	-0.0175	0.0047	0.00019	676666
rs13292008	9:87404070	NTRK2	A/G	0.96603	-0.0177	0.0047	0.00019	687578
rs6747307	2:63922893	WDPCP	T/C	0.5609	-0.0065	0.0017	0.00019	687338
rs7829058	8:38332095	FGFR1	C/G	0.1361	-0.009	0.0024	0.0002	779773
rs11140785	9:87466777	NTRK2	A/T	0.4627	0.0065	0.0017	0.00021	682319
rs12552902	9:87401314	NTRK2	A/G	0.96387	-0.0173	0.0047	0.00021	688096
rs468022	5:36988252	NIPBL	A/G	0.1576	-0.009	0.0024	0.00022	691474
rs7020597	9:87396407	NTRK2	T/C	0.03613	0.0172	0.0047	0.00022	688182
rs12028447	1:243617092	SDCCAG8	T/C	0.1091	-0.0103	0.0028	0.00022	683870
rs12127169	1:243615023	SDCCAG8	T/C	0.1087	-0.0103	0.0028	0.00022	683902
rs10867041	9:140551809	EHMT1	T/C	0.1446	-0.0096	0.0026	0.00024	561206
rs941448	17:17654542	RAI1	C/G	0.3265	-0.0069	0.0019	0.00024	685446
rs11125947	2:63334101	WDPCP	T/C	0.3196	-0.0069	0.0019	0.00024	684141
rs7162166	15:72988040	BBS4	A/C	0.8915	0.0103	0.0028	0.00025	687298
rs11656665	17:17724789	RAI1	A/G	0.6245	0.0067	0.0018	0.00026	683385
rs12464471	2:63686428	WDPCP	A/G	0.783	0.0075	0.0021	0.00026	685600
rs12447449	16:3880659	CREBBP	A/G	0.96825	-0.0162	0.0045	0.00027	589160
rs13287010	9:87396208	NTRK2	A/C	0.96416	-0.017	0.0047	0.00027	688339
rs2297508	17:17715317	RAI1	C/G	0.3667	-0.0067	0.0018	0.00027	684132
rs1025743	9:87315117	NTRK2	T/C	0.4753	-0.0063	0.0017	0.00028	686931
rs7749960	6:57045556	RAB23	A/C	0.08635	-0.0115	0.0032	0.00028	692596
rs9349845	6:57041124	RAB23	T/C	0.91359	0.0115	0.0032	0.00028	692585
rs9357940	6:57059820	RAB23	T/G	0.91318	0.0115	0.0032	0.00028	691911
rs976529	1:243471462	SDCCAG8	T/C	0.03309	-0.0177	0.0049	0.00028	678582
rs13289538	9:87400217	NTRK2	A/G	0.96305	-0.0169	0.0047	0.00029	688270
rs7855888	9:87452058	NTRK2	T/C	0.7498	-0.0073	0.002	0.00029	674074
rs9370567	6:57038369	RAB23	A/C	0.91382	0.0115	0.0032	0.00029	692572
rs9475788	6:57057219	RAB23	A/G	0.91376	0.0115	0.0032	0.00029	692505
rs10927022	1:243618064	SDCCAG8	A/G	0.1142	-0.01	0.0028	0.00031	671469
rs9296862	6:57051017	RAB23	A/G	0.91411	0.0114	0.0032	0.00032	692168
rs10152428	15:93510243	CHD2	C/G	0.7253	-0.007	0.002	0.00033	688875
rs292181	5:36952576	NIPBL	T/C	0.1651	-0.0084	0.0023	0.00033	691946
rs10114941	9:87443528	NTRK2	C/G	0.04063	0.0161	0.0045	0.00033	677566
rs158794	5:36883088	NIPBL	T/G	0.1621	-0.0086	0.0024	0.00034	691868
rs1040461	6:57055354	RAB23	T/C	0.0863	-0.0113	0.0032	0.00034	692606
rs4778061	15:93501398	CHD2	A/T	0.7378	-0.007	0.002	0.00035	681203
rs12898814	15:73030536	BBS4	T/G	0.1126	-0.01	0.0028	0.00036	690275
rs292179	5:36947613	NIPBL	A/G	0.8303	0.0083	0.0023	0.00037	691995
rs292186	5:36967422	NIPBL	T/C	0.165	-0.0084	0.0023	0.00037	691878
rs11140783	9:87454817	NTRK2	T/C	0.08483	0.0112	0.0031	0.00037	692606
rs13284421	9:87338999	NTRK2	A/G	0.03438	0.0164	0.0046	0.00037	679424
rs12127073	1:243614705	SDCCAG8	C/G	0.8873	0.0098	0.0028	0.00038	683659
rs151946	5:36884166	NIPBL	A/G	0.8423	0.0085	0.0024	0.00039	691881
rs293774	5:36943268	NIPBL	A/G	0.1611	-0.0084	0.0024	0.00039	692296
rs6026592	20:57477211	GNAS	A/G	0.3714	0.0066	0.0019	0.00042	663804
rs158793	5:36885090	NIPBL	A/G	0.158	-0.0084	0.0024	0.00042	691885
rs292196	5:36914179	NIPBL	T/C	0.1655	-0.0083	0.0023	0.00042	692275
rs6128461	20:57477090	GNAS	T/C	0.3723	0.0065	0.0018	0.00044	669454
rs12338909	9:87581059	NTRK2	T/G	0.08197	-0.0114	0.0032	0.00044	682887
rs10803143	1:243615589	SDCCAG8	T/C	0.2629	-0.0069	0.002	0.00044	682829
rs17114996	15:25245502	SNURF	A/G	0.02081	0.0211	0.006	0.00044	688745
rs6123832	20:57418071	GNAS	T/C	0.359	-0.0064	0.0018	0.00045	692528
rs158797	5:36870420	NIPBL	T/G	0.8347	0.0082	0.0024	0.00047	691840
rs292160	5:36896073	NIPBL	T/G	0.8355	0.0082	0.0023	0.00047	692226
rs294695	5:36986688	NIPBL	T/C	0.8358	0.0082	0.0023	0.00048	691740
rs10868229	9:87463562	NTRK2	A/G	0.501	0.006	0.0017	0.00048	736391
rs7870666	9:87449460	NTRK2	A/T	0.7616	-0.0072	0.0021	0.00048	674771
rs16903459	5:37031416	NIPBL	A/G	0.8393	0.0083	0.0024	0.00049	690911
rs11140780	9:87452780	NTRK2	A/G	0.91558	-0.0111	0.0032	0.0005	687068
rs12056959	9:87449073	NTRK2	C/G	0.08594	0.0112	0.0032	0.0005	673788
rs2490400	1:243492643	SDCCAG8	T/C	0.7629	0.0072	0.0021	0.00051	646058
rs12993804	2:63494689	WDPCP	A/T	0.2896	-0.0066	0.0019	0.00052	689458
rs17087753	9:87450180	NTRK2	T/C	0.91441	-0.011	0.0032	0.00053	682564
rs17114992	15:25244140	SNURF	T/G	0.02157	0.0214	0.0062	0.00053	674160
rs7825208	8:38327287	FGFR1	A/G	0.8782	0.0091	0.0026	0.00055	691670
rs5995341	22:37161320	IFT27	T/C	0.06478	-0.0121	0.0035	0.00056	683460
rs10206947	2:63425505	WDPCP	A/G	0.1892	0.0076	0.0022	0.00057	689914
rs293746	5:36895270	NIPBL	A/G	0.834	0.0081	0.0023	0.00058	692243
rs158410	5:36858661	NIPBL	A/T	0.8361	0.0081	0.0023	0.00059	691778
rs10512155	9:87445916	NTRK2	A/C	0.04069	0.0154	0.0045	0.0006	676809
rs972721	2:63361502	WDPCP	T/C	0.2479	-0.0065	0.0019	0.0006	788660
rs2531757	3:45850520	LZTFL1	A/C	0.3451	0.0063	0.0019	0.00061	662528
rs4877883	9:87445806	NTRK2	T/G	0.04069	0.0153	0.0045	0.00065	676907
rs7600451	2:170374134	BBS5	T/G	0.03297	-0.0167	0.0049	0.00068	683423
rs850813	15:23895635	MAGEL2	A/G	0.4463	0.0062	0.0018	0.00068	637647
rs3006917	1:243641971	SDCCAG8	T/C	0.1898	-0.0074	0.0022	0.00068	687359
rs4146968	1:243423552	SDCCAG8	A/G	0.8564	0.0085	0.0025	0.00069	692061
rs17114938	15:25224917	SNURF	T/G	0.02	0.0202	0.006	0.00069	676809
rs7271854	20:57447022	GNAS	T/C	0.3989	0.0061	0.0018	0.00072	666506
rs10280367	7:33300659	BBS9	A/T	0.94691	-0.013	0.0038	0.00074	679530
rs1800905	20:57415995	GNAS	A/G	0.3589	-0.0063	0.0019	0.00074	637594
rs17115021	15:25264380	SNURF	T/C	0.97954	-0.02	0.006	0.00077	685373
rs12891466	14:89347106	TTC8	T/C	0.8808	-0.0087	0.0026	0.00079	691422
rs6718611	2:170355378	BBS5	A/G	0.03175	-0.0165	0.0049	0.0008	691817
rs16903490	5:37068046	NIPBL	A/G	0.831	0.0078	0.0023	0.0008	690738
rs10754800	1:243454083	SDCCAG8	A/G	0.8527	0.0084	0.0025	0.00081	691401
rs234632	20:57482070	GNAS	T/G	0.9651	0.0168	0.005	0.00082	661787
rs11140720	9:87272824	NTRK2	A/C	0.91382	0.0103	0.0031	0.00082	692490
rs2994339	1:243641420	SDCCAG8	A/G	0.8087	0.0073	0.0022	0.00083	688149
rs2071486	4:122740162	BBS7	T/C	0.336	0.0061	0.0018	0.00084	691919
rs12424648	12:76725000	BBS10	A/G	0.0442	0.012	0.0036	0.00086	766646
rs11140721	9:87274748	NTRK2	C/G	0.08594	-0.0103	0.0031	0.00087	692417
rs11805838	1:243452013	SDCCAG8	A/G	0.8556	0.0083	0.0025	0.00088	691593
rs10119181	9:87475368	NTRK2	T/G	0.8637	-0.0079	0.0024	0.00094	790562
rs7580520	2:63909178	WDPCP	T/C	0.6946	-0.0063	0.0019	0.00095	675433
rs11227510	11:66281220	BBS1	T/C	0.7543	0.0066	0.002	0.00097	692424
rs1507994	4:122749541	BBS7	T/C	0.3352	0.0061	0.0018	0.00097	692026
rs10254276	7:33297773	BBS9	T/C	0.94697	-0.0126	0.0038	0.001	689449
rs4925115	17:17721457	RAI1	A/G	0.3763	-0.006	0.0018	0.001	682336
rs12890993	14:89310261	TTC8	A/G	0.8808	-0.0086	0.0026	0.001	691492
rs12897989	14:89311774	TTC8	A/G	0.1191	0.0085	0.0026	0.001	691474
rs17124926	14:89332542	TTC8	A/G	0.8807	-0.0086	0.0026	0.001	691454
rs11227512	11:66281291	BBS1	T/C	0.7543	0.0065	0.002	0.0011	692593
rs17065	11:66277035	BBS1	A/G	0.2454	-0.0066	0.002	0.0011	692591
rs17496250	11:66270774	BBS1	C/G	0.7546	0.0066	0.002	0.0011	692568
rs2305535	11:66272237	BBS1	A/G	0.248	-0.0066	0.002	0.0011	692569
rs3816492	11:66297363	BBS1	T/C	0.246	-0.0066	0.002	0.0011	692547
rs9969765	9:87489785	NTRK2	C/G	0.341	0.0061	0.0019	0.0011	633500
rs11800122	1:243613748	SDCCAG8	A/G	0.1655	-0.0078	0.0024	0.0011	670401
rs17114990	15:25243304	SNURF	A/G	0.97884	-0.0195	0.006	0.0011	686964
rs7173388	15:25263027	SNURF	A/G	0.97895	-0.0193	0.0059	0.0011	673448
rs12885238	14:89286425	TTC8	A/C	0.119	0.0085	0.0026	0.0011	690643
rs2054120	2:63911816	WDPCP	A/G	0.2267	-0.0067	0.002	0.0011	684949
rs7560499	2:63983802	WDPCP	T/C	0.8635	-0.0083	0.0025	0.0011	686038
rs10501397	11:66272976	BBS1	A/C	0.2481	-0.0065	0.002	0.0012	692457
rs11227511	11:66281244	BBS1	A/C	0.7537	0.0065	0.002	0.0012	692414
rs2298806	11:66282095	BBS1	A/G	0.2461	-0.0065	0.002	0.0012	692575
rs2305532	11:66298594	BBS1	T/C	0.2457	-0.0065	0.002	0.0012	692533
rs2305533	11:66298623	BBS1	A/C	0.7543	0.0065	0.002	0.0012	692533
rs9889162	16:56555788	BBS2	A/T	0.2635	-0.0063	0.0019	0.0012	692183
rs4556159	9:140719390	EHMT1	T/G	0.6283	-0.0058	0.0018	0.0012	687503
rs4394479	9:87618543	NTRK2	A/G	0.1462	-0.008	0.0025	0.0012	689352
rs6085092	20:5300006	PROKR2	T/C	0.5699	0.0057	0.0018	0.0012	681338
rs6565261	16:28903656	SH2B1	A/C	0.2891	-0.006	0.0018	0.0012	773743
rs6546028	2:64060658	WDPCP	C/G	0.95627	-0.0131	0.004	0.0012	675196
rs3741360	11:66300348	BBS1	A/G	0.7529	0.0065	0.002	0.0013	692041
rs13396747	2:170397635	BBS5	A/C	0.03315	-0.0146	0.0045	0.0013	786720
rs11789684	9:140706127	EHMT1	A/G	0.6244	-0.0058	0.0018	0.0013	688403
rs1439054	9:87267699	NTRK2	A/G	0.91359	0.0099	0.0031	0.0013	691822
rs1010479	20:5300427	PROKR2	A/G	0.4339	-0.0056	0.0018	0.0013	681330
rs1517408	2:63490493	WDPCP	A/G	0.4914	0.0052	0.0016	0.0013	793291
rs10896125	11:66288733	BBS1	C/G	0.2462	-0.0064	0.002	0.0014	692477
rs11227501	11:66274072	BBS1	T/C	0.7537	0.0064	0.002	0.0014	692598
rs11227515	11:66287383	BBS1	A/G	0.2461	-0.0064	0.002	0.0014	692436
rs4556786	16:56485871	BBS2	A/G	0.2473	-0.0064	0.002	0.0014	691326
rs4777529	15:73013776	BBS4	A/G	0.09091	-0.0095	0.003	0.0014	691110
rs3843532	7:33154447	BBS9	T/C	0.2442	-0.0066	0.0021	0.0014	668551
rs130038	16:3857035	CREBBP	T/G	0.94124	0.0131	0.0041	0.0014	618054
rs11621939	14:89291735	TTC8	A/T	0.881	-0.0084	0.0026	0.0014	691667
rs17124947	14:89361488	TTC8	A/C	0.1201	0.0084	0.0026	0.0014	692519
rs9323833	14:89294699	TTC8	T/C	0.1191	0.0084	0.0026	0.0014	691549
rs12472865	2:63771769	WDPCP	T/C	0.2237	-0.0065	0.002	0.0014	690937
rs11822028	11:66288123	BBS1	T/C	0.7523	0.0064	0.002	0.0015	692475
rs3819247	11:66293779	BBS1	T/C	0.7537	0.0064	0.002	0.0015	692463
rs17395534	7:33234331	BBS9	A/G	0.94826	-0.0116	0.0036	0.0015	777987
rs7851955	9:140708768	EHMT1	T/G	0.3748	0.0057	0.0018	0.0015	687851
rs4554233	5:42619316	GHR	A/G	0.8072	0.007	0.0022	0.0015	692381
rs13440094	9:87619071	NTRK2	T/C	0.1773	-0.0074	0.0023	0.0015	689479
rs1662695	9:87405212	NTRK2	A/G	0.8699	0.0079	0.0025	0.0015	773832
rs3780632	9:87352788	NTRK2	T/C	0.6595	0.0058	0.0018	0.0015	687598
rs4877288	9:87388848	NTRK2	A/G	0.6631	0.0059	0.0018	0.0015	681968
rs223289	6:57106426	RAB23	T/G	0.1036	-0.0093	0.0029	0.0015	672677
rs1109027	2:63815206	WDPCP	A/G	0.7758	0.0065	0.002	0.0015	691974
rs13337155	16:56504724	BBS2	C/G	0.2483	-0.0063	0.002	0.0016	692374
rs8060037	16:56484820	BBS2	T/C	0.2512	-0.0063	0.002	0.0016	691213
rs1439621	15:93441907	CHD2	A/G	0.3181	0.0059	0.0019	0.0016	689030
rs7170052	15:93457650	CHD2	T/C	0.7515	0.0064	0.002	0.0016	674631
rs11948453	5:42610117	GHR	T/G	0.1973	-0.0069	0.0022	0.0016	686660
rs850810	15:23897899	MAGEL2	C/G	0.4088	-0.0057	0.0018	0.0016	680681
rs10746750	9:87384534	NTRK2	A/G	0.6622	0.0058	0.0018	0.0016	683157
rs7048278	9:87360153	NTRK2	A/G	0.6597	0.0058	0.0018	0.0016	686887
rs10737887	1:243424146	SDCCAG8	T/C	0.1292	-0.0083	0.0026	0.0016	692514
rs4866791	5:42617692	GHR	A/G	0.8024	0.0068	0.0022	0.0017	684162
rs2378671	9:87382724	NTRK2	T/C	0.343	-0.0058	0.0018	0.0017	684254
rs7046620	9:87365120	NTRK2	A/G	0.3406	-0.0057	0.0018	0.0017	686750
rs7867174	9:87381476	NTRK2	C/G	0.3396	-0.0058	0.0018	0.0017	685435
rs10210482	2:64058713	WDPCP	T/C	0.95615	-0.0137	0.0044	0.0017	671474
rs2421879	2:63483916	WDPCP	A/C	0.4916	0.0054	0.0017	0.0017	690108
rs2699393	2:63491438	WDPCP	A/G	0.5101	-0.0054	0.0017	0.0017	688621
rs2699397	2:63487218	WDPCP	T/C	0.5084	-0.0054	0.0017	0.0017	689915
rs17618045	2:63793255	WDPCP	T/C	0.7762	0.0064	0.002	0.0018	691288
rs6462473	7:33418376	BBS9	A/C	0.2211	-0.0065	0.0021	0.0019	688929
rs10780185	9:140607252	EHMT1	T/C	0.382	0.0056	0.0018	0.0019	680833
rs13354167	5:42610409	GHR	T/C	0.1917	-0.0069	0.0022	0.0019	686969
rs7709790	5:42610090	GHR	C/G	0.8094	0.0069	0.0022	0.0019	686747
rs1778970	9:87395810	NTRK2	A/G	0.3371	-0.0057	0.0018	0.0019	681795
rs7023589	9:87372097	NTRK2	A/G	0.6639	0.0057	0.0018	0.0019	685777
rs6107619	20:5316112	PROKR2	A/G	0.2268	-0.0064	0.0021	0.0019	685353
rs1850983	2:63448724	WDPCP	C/G	0.97539	0.017	0.0055	0.0019	689359
rs9995319	4:122770677	BBS7	C/G	0.3858	-0.0054	0.0018	0.002	685933
rs11140745	9:87355358	NTRK2	T/C	0.341	-0.0057	0.0018	0.002	687720
rs11140746	9:87358664	NTRK2	T/C	0.3414	-0.0057	0.0018	0.002	686627
rs1187272	9:87404086	NTRK2	A/G	0.6631	0.0057	0.0019	0.002	678840
rs996406	20:5313380	PROKR2	T/G	0.773	0.0064	0.0021	0.002	684557
rs17619012	2:63893589	WDPCP	T/G	0.2265	-0.0064	0.0021	0.002	688626
rs9940872	16:56561857	BBS2	T/C	0.7343	0.006	0.0019	0.0021	691685
rs1048012	22:37163329	IFT27	T/C	0.7963	0.0069	0.0022	0.0021	638284
rs850807	15:23898129	MAGEL2	T/C	0.4089	-0.0056	0.0018	0.0021	674338
rs10746747	9:87354637	NTRK2	A/T	0.3405	-0.0056	0.0018	0.0021	686786
rs1838159	9:87406956	NTRK2	T/G	0.6625	0.0057	0.0019	0.0021	670824
rs10803140	1:243573389	SDCCAG8	C/G	0.467	-0.0053	0.0017	0.0021	688941
rs1517407	2:63490331	WDPCP	A/G	0.5085	-0.0053	0.0017	0.0021	690374
rs3759870	15:73019968	BBS4	A/G	0.90792	0.0091	0.003	0.0022	692240
rs17395966	7:33238151	BBS9	A/G	0.94826	-0.0118	0.0039	0.0022	675561
rs1992283	15:93438609	CHD2	C/G	0.6821	-0.0057	0.0019	0.0022	690997
rs7286979	22:41498627	EP300	A/G	0.3385	0.0056	0.0018	0.0022	689296
rs4144550	9:87369613	NTRK2	A/G	0.1355	-0.0079	0.0026	0.0022	674151
rs10983313	9:119470959	TRIM32	A/C	0.91511	0.0092	0.003	0.0022	691796
rs2699394	2:63491169	WDPCP	T/C	0.4909	0.0053	0.0017	0.0022	689727
rs2901574	2:63492410	WDPCP	A/C	0.4895	0.0052	0.0017	0.0022	689819
rs2076578	22:41569609	EP300	T/C	0.3382	0.0056	0.0018	0.0023	691874
rs7702524	5:42613898	GHR	T/C	0.1717	-0.007	0.0023	0.0023	687165
rs3737525	11:66306355	BBS1	A/G	0.7483	0.0061	0.002	0.0024	691778
rs4776611	15:73004188	BBS4	T/C	0.09144	-0.009	0.003	0.0024	691400
rs7037783	9:140610042	EHMT1	T/C	0.621	-0.0057	0.0019	0.0024	625499
rs6996321	8:38322346	FGFR1	A/G	0.3849	-0.005	0.0017	0.0024	795544
rs1778971	9:87394720	NTRK2	C/G	0.6631	0.0056	0.0018	0.0024	681106
rs9357941	6:57074911	RAB23	A/G	0.05022	-0.0127	0.0042	0.0024	688308
rs1517406	2:63486777	WDPCP	A/C	0.4901	0.0052	0.0017	0.0024	690335
rs17028100	2:63940783	WDPCP	A/T	0.2498	0.006	0.002	0.0024	686453
rs4076212	4:122799461	BBS7	A/T	0.8709	0.0081	0.0027	0.0025	652149
rs17002284	22:41496846	EP300	A/G	0.662	-0.0055	0.0018	0.0025	688639
rs10440649	5:42616341	GHR	A/T	0.1907	-0.0067	0.0022	0.0025	687642
rs11807162	1:243454680	SDCCAG8	A/G	0.1234	-0.0081	0.0027	0.0025	690039
rs4833236	4:122776067	BBS7	A/G	0.6145	0.0053	0.0018	0.0026	691925
rs6123836	20:57448746	GNAS	T/C	0.3563	0.0053	0.0018	0.0026	762299
rs5756342	22:37179546	IFT27	C/G	0.7962	0.0069	0.0023	0.0026	682507
rs10465179	9:87392389	NTRK2	T/C	0.6583	0.0055	0.0018	0.0026	682302
rs12134228	1:243447618	SDCCAG8	T/C	0.1284	-0.0079	0.0026	0.0026	691783
rs3825065	11:66311011	BBS1	A/G	0.7469	0.0057	0.0019	0.0027	788492
rs7806498	7:33355624	BBS9	C/G	0.0535	0.0116	0.0039	0.0027	686539
rs2143694	22:41584351	EP300	A/G	0.3376	0.0055	0.0018	0.0027	692640
rs5758222	22:41486193	EP300	A/G	0.662	-0.0055	0.0018	0.0027	688268
rs9292854	5:42611820	GHR	C/G	0.1905	-0.0067	0.0022	0.0027	685943
rs12173390	6:57089708	RAB23	A/T	0.04373	-0.0141	0.0047	0.0027	682331
rs12026068	1:243440352	SDCCAG8	A/G	0.8705	0.0079	0.0026	0.0027	691591
rs6468697	8:100870382	VPS13B	A/G	0.7882	-0.006	0.002	0.0027	765573
rs12473342	2:63942784	WDPCP	A/G	0.2497	0.006	0.002	0.0027	692340
rs13431584	2:63514651	WDPCP	A/G	0.474	0.0052	0.0017	0.0027	690011
rs10084948	4:122765649	BBS7	T/C	0.3889	-0.0052	0.0018	0.0028	691876
rs2109526	7:33511742	BBS9	T/G	0.1748	0.0069	0.0023	0.0028	678907
rs6952538	7:33357152	BBS9	T/G	0.9465	-0.0115	0.0039	0.0028	686592
rs5751058	22:41565285	EP300	A/G	0.6617	-0.0056	0.0019	0.0028	637647
rs4810148	20:57447911	GNAS	T/C	0.652	-0.0055	0.0018	0.0028	684279
rs10465180	9:87392582	NTRK2	T/C	0.6583	0.0055	0.0019	0.0028	682265
rs12510839	4:122760968	BBS7	A/G	0.3856	-0.0052	0.0018	0.0029	692077
rs13152701	4:122751061	BBS7	A/G	0.3856	-0.0052	0.0018	0.0029	689708
rs3217772	4:122739183	BBS7	C/G	0.6142	0.0052	0.0018	0.0029	691828
rs6962002	7:33365917	BBS9	A/G	0.05361	0.0115	0.0039	0.0029	678921
rs10780690	9:87478172	NTRK2	T/G	0.5182	0.0052	0.0017	0.0029	684904
rs6730863	2:63939417	WDPCP	T/C	0.7509	-0.0059	0.002	0.0029	692489
rs993244	2:63489517	WDPCP	A/C	0.4914	0.0051	0.0017	0.0029	690292
rs13387104	2:170375686	BBS5	T/C	0.4473	0.0051	0.0017	0.003	688938
rs9998785	4:122728965	BBS7	A/T	0.614	0.0052	0.0018	0.003	692446
rs7852475	9:140698856	EHMT1	T/C	0.6222	-0.0055	0.0018	0.003	666526
rs5758251	22:41570745	EP300	T/C	0.6618	-0.0054	0.0018	0.003	692064
rs13182117	5:42611848	GHR	T/G	0.8456	0.0072	0.0024	0.003	686991
rs10926979	1:243433141	SDCCAG8	C/G	0.6711	-0.0055	0.0018	0.003	691704
rs1829524	2:63407893	WDPCP	T/C	0.2032	0.0064	0.0022	0.003	690300
rs17087959	9:87575920	NTRK2	T/C	0.8266	0.007	0.0024	0.0031	677872
rs13119055	4:122755162	BBS7	T/C	0.6144	0.0052	0.0018	0.0032	692013
rs6451634	5:42684937	GHR	T/C	0.1657	-0.0068	0.0023	0.0032	691445
rs10803131	1:243435622	SDCCAG8	A/G	0.6711	-0.0054	0.0018	0.0032	691789
rs13010733	2:63363355	WDPCP	T/G	0.8052	0.0065	0.0022	0.0032	686486
rs13145213	4:122750079	BBS7	T/C	0.3857	-0.0052	0.0018	0.0033	691853
rs17005256	4:122755245	BBS7	A/G	0.6142	0.0052	0.0018	0.0033	692092
rs3762840	4:122746596	BBS7	A/T	0.6142	0.0052	0.0018	0.0033	691954
rs4487855	9:140682841	EHMT1	T/C	0.6303	-0.0054	0.0019	0.0033	634385
rs7442690	5:42625755	GHR	A/G	0.1665	-0.0068	0.0023	0.0033	689537
rs850817	15:23893689	MAGEL2	A/G	0.5911	0.0053	0.0018	0.0033	683498
rs6559839	9:87575426	NTRK2	T/C	0.7304	0.0058	0.002	0.0033	683298
rs9396263	6:57070684	RAB23	A/G	0.05051	-0.0123	0.0042	0.0033	688268
rs11790014	9:119449230	TRIM32	C/G	0.08489	-0.0089	0.003	0.0033	679819
rs2271176	4:122791601	BBS7	C/G	0.3858	-0.0052	0.0018	0.0034	691762
rs8024528	15:93463631	CHD2	T/C	0.5295	0.005	0.0017	0.0034	689421
rs1800900	20:57415110	GNAS	A/G	0.3593	-0.005	0.0017	0.0034	792624
rs1024626	3:45902844	LZTFL1	A/G	0.93224	0.0115	0.0039	0.0034	675743
rs12237968	9:119451880	TRIM32	T/G	0.91558	0.0089	0.003	0.0034	674006
rs6735699	2:63794888	WDPCP	T/G	0.0159	-0.0174	0.006	0.0035	655577
rs3867132	11:66309269	BBS1	T/C	0.1731	-0.0066	0.0023	0.0036	691800
rs1048433	4:122748996	BBS7	A/C	0.615	0.0051	0.0018	0.0036	691917
rs5756339	22:37166457	IFT27	T/C	0.7972	0.0063	0.0022	0.0036	692492
rs10983312	9:119470800	TRIM32	C/G	0.07022	-0.0096	0.0033	0.0036	680054
rs6451633	5:42678017	GHR	T/C	0.1669	-0.0067	0.0023	0.0037	691517
rs6873794	5:42674205	GHR	T/C	0.8341	0.0067	0.0023	0.0037	691947
rs4821525	22:37169985	IFT27	T/C	0.2038	-0.0063	0.0022	0.0037	692355
rs6576608	15:23909626	MAGEL2	A/G	0.4521	-0.0052	0.0018	0.0037	670177
rs4412435	9:87585497	NTRK2	T/C	0.5623	0.0051	0.0017	0.0037	683440
rs12079656	1:243453119	SDCCAG8	T/G	0.3292	0.0053	0.0018	0.0037	692542
rs10520716	15:93491017	CHD2	A/G	0.5297	0.005	0.0017	0.0038	688684
rs4413537	5:42645846	GHR	T/C	0.1665	-0.0067	0.0023	0.0038	691599
rs6894403	5:42689895	GHR	A/G	0.8375	0.0067	0.0023	0.0038	684894
rs12685845	9:87464336	NTRK2	A/G	0.1389	0.0074	0.0026	0.0038	687295
rs984682	2:63345921	WDPCP	A/G	0.2038	0.0062	0.0022	0.0038	687234
rs11957404	5:42616164	GHR	A/T	0.1718	-0.0066	0.0023	0.0039	681485
rs4594864	5:42624138	GHR	T/C	0.8337	0.0067	0.0023	0.0039	690270
rs5025611	5:42712153	GHR	A/G	0.8364	0.0067	0.0023	0.0039	690636
rs7273251	20:57450415	GNAS	T/C	0.02958	0.016	0.0055	0.0039	540501
rs4683147	3:45948264	LZTFL1	A/G	0.4045	0.0052	0.0018	0.0039	677336
rs6559840	9:87575500	NTRK2	T/C	0.27	-0.0057	0.002	0.0039	683299
rs13000147	2:63424045	WDPCP	A/C	0.8258	0.0066	0.0023	0.0039	688250
rs10250448	7:33489223	BBS9	A/G	0.899	0.0082	0.0029	0.004	689695
rs6462470	7:33367004	BBS9	A/C	0.05361	0.0111	0.0039	0.004	684770
rs1881835	15:93490189	CHD2	A/C	0.5303	0.005	0.0017	0.004	688735
rs10041932	5:42641889	GHR	A/G	0.8336	0.0066	0.0023	0.004	691626
rs6878461	5:42674369	GHR	A/G	0.8341	0.0067	0.0023	0.004	691943
rs4821524	22:37168725	IFT27	T/C	0.7962	0.0062	0.0022	0.004	692100
rs5750303	22:37166674	IFT27	T/C	0.7964	0.0062	0.0022	0.004	692442
rs876471	8:38333273	FGFR1	A/C	0.3734	-0.0051	0.0018	0.0041	689440
rs11948463	5:42640471	GHR	T/C	0.1676	-0.0066	0.0023	0.0041	691604
rs7447731	5:42680233	GHR	T/C	0.166	-0.0066	0.0023	0.0041	691646
rs9292856	5:42645266	GHR	T/G	0.8335	0.0066	0.0023	0.0041	691503
rs1596360	9:87579148	NTRK2	A/G	0.2692	-0.0057	0.002	0.0041	683456
rs12074660	1:243451974	SDCCAG8	T/C	0.6711	-0.0053	0.0019	0.0041	684889
rs4777528	15:72993049	BBS4	T/C	0.09086	-0.0085	0.003	0.0042	691377
rs6000410	22:37177190	IFT27	A/G	0.2038	-0.0063	0.0022	0.0042	691630
rs2275154	1:243433654	SDCCAG8	A/G	0.6712	-0.0053	0.0018	0.0042	691622
rs1439618	15:93449969	CHD2	A/G	0.5402	0.005	0.0018	0.0043	671038
rs4451056	5:42655353	GHR	C/G	0.1659	-0.0066	0.0023	0.0043	692373
rs6451632	5:42669982	GHR	A/G	0.834	0.0066	0.0023	0.0043	692198
rs4877894	9:87590382	NTRK2	A/G	0.571	0.0049	0.0017	0.0043	692056
rs12670765	7:33412528	BBS9	C/G	0.0532	0.0111	0.0039	0.0044	676028
rs12677355	8:38329943	FGFR1	T/C	0.3796	-0.0051	0.0018	0.0044	688328
rs7721081	5:42650384	GHR	T/C	0.1659	-0.0066	0.0023	0.0044	692418
rs129333	22:37153289	IFT27	A/G	0.2034	-0.0062	0.0022	0.0044	691789
rs4821522	22:37168444	IFT27	A/G	0.2025	-0.0062	0.0022	0.0044	692253
rs2248228	3:45965386	LZTFL1	A/G	0.4021	0.005	0.0018	0.0044	691154
rs7173103	15:93462960	CHD2	T/G	0.4697	-0.0049	0.0017	0.0045	689201
rs7390131	9:140680073	EHMT1	T/C	0.3707	0.0051	0.0018	0.0045	689446
rs7583698	2:27712408	IFT172	T/C	0.05443	0.0104	0.0036	0.0045	781112
rs10926978	1:243431654	SDCCAG8	T/C	0.6711	-0.0052	0.0018	0.0045	691529
rs10867067	9:140680532	EHMT1	A/G	0.6292	-0.0051	0.0018	0.0046	689780
rs12091558	1:243453910	SDCCAG8	T/C	0.3296	0.0052	0.0018	0.0046	691977
rs3897821	1:243420388	SDCCAG8	A/G	0.6642	-0.0052	0.0018	0.0046	692010
rs2683451	2:170384532	BBS5	A/G	0.5545	-0.0046	0.0016	0.0047	793529
rs7802391	7:33560825	BBS9	T/G	0.02496	0.0152	0.0054	0.0047	664795
rs1569857	22:41540934	EP300	C/G	0.6617	-0.0052	0.0018	0.0047	691573
rs4994772	5:42668149	GHR	A/C	0.1665	-0.0065	0.0023	0.0047	692247
rs4075274	9:87596562	NTRK2	T/C	0.4288	-0.0049	0.0017	0.0047	690905
rs6878512	5:42667871	GHR	T/C	0.1668	-0.0065	0.0023	0.0048	692272
rs2994329	1:243647921	SDCCAG8	T/C	0.1961	-0.006	0.0021	0.0048	692587
rs3798508	6:100853964	SIM1	T/C	0.2065	0.0058	0.0021	0.0048	736120
rs11769528	7:33537666	BBS9	A/C	0.825	-0.0065	0.0023	0.0049	661979
rs12638201	3:45934279	LZTFL1	A/G	0.06665	0.0094	0.0033	0.0049	679329
rs6038134	20:5311616	PROKR2	T/C	0.53	0.0049	0.0017	0.0049	681230
rs12666246	7:33424928	BBS9	T/C	0.05098	0.011	0.0039	0.005	676370
rs17170243	7:33482084	BBS9	T/C	0.899	0.0081	0.0029	0.005	689383
rs4075561	9:87595771	NTRK2	T/G	0.5712	0.0049	0.0017	0.005	691235
rs7266208	20:5295566	PROKR2	A/C	0.3472	-0.0051	0.0018	0.005	689160
rs6983315	8:38299419	FGFR1	A/G	0.4294	-0.0049	0.0018	0.0051	691811
rs6987534	8:38299715	FGFR1	C/G	0.4295	-0.0049	0.0018	0.0051	690864
rs9831315	3:45956362	LZTFL1	C/G	0.4055	0.0049	0.0017	0.0051	691835
rs10803132	1:243437266	SDCCAG8	T/C	0.6711	-0.0051	0.0018	0.0051	691668
rs12666395	7:33502696	BBS9	A/C	0.94843	-0.011	0.0039	0.0052	676377
rs4866792	5:42651224	GHR	T/C	0.8338	0.0065	0.0023	0.0052	692538
rs4075562	9:87595866	NTRK2	T/C	0.5711	0.0048	0.0017	0.0052	691288
rs12443243	15:93465927	CHD2	T/C	0.4674	-0.0048	0.0017	0.0053	691680
rs13188386	5:42473555	GHR	A/G	0.2665	-0.0054	0.0019	0.0053	692497
rs4419597	5:42666104	GHR	T/C	0.1777	-0.0063	0.0023	0.0053	691636
rs7129	3:45959759	LZTFL1	T/C	0.5908	-0.0049	0.0017	0.0053	692607
rs129968	16:3791261	CREBBP	A/G	0.3499	0.0051	0.0018	0.0055	691938
rs7351709	20:5296798	PROKR2	T/C	0.6519	0.005	0.0018	0.0055	687884
rs10116287	9:87477274	NTRK2	T/G	0.8587	-0.0071	0.0025	0.0056	689127
rs3733103	3:45962595	LZTFL1	C/G	0.5924	-0.005	0.0018	0.0057	637607
rs4812034	20:57397566	GNAS	T/G	0.535	0.0048	0.0017	0.0058	689525
rs2992632	1:243503764	SDCCAG8	A/T	0.7067	-0.0053	0.0019	0.0058	675368
rs6979138	7:33440913	BBS9	T/C	0.94837	-0.0108	0.0039	0.0059	676338
rs7396690	11:8115762	TUB	C/G	0.04408	0.0104	0.0038	0.0059	614097
rs1387926	9:87632663	NTRK2	T/C	0.1414	-0.0068	0.0025	0.006	690985
rs1072755	3:45975983	LZTFL1	A/G	0.5948	-0.0048	0.0018	0.0061	691038
rs8120223	20:5296005	PROKR2	T/C	0.3468	-0.005	0.0018	0.0061	688497
rs6695785	1:243535260	SDCCAG8	T/C	0.4658	-0.0048	0.0017	0.0061	676830
rs7270408	20:5285094	PROKR2	A/G	0.3816	-0.0049	0.0018	0.0062	689526
rs12741781	1:243428152	SDCCAG8	T/G	0.6649	-0.005	0.0018	0.0062	688409
rs8125112	20:57431165	GNAS	T/C	0.842	-0.0064	0.0024	0.0063	688347
rs3774642	3:45937782	LZTFL1	C/G	0.93312	-0.0091	0.0033	0.0063	691907
rs1025131	2:63361516	WDPCP	T/C	0.2	0.0059	0.0022	0.0063	687581
rs11098645	4:122729251	BBS7	A/G	0.3182	0.0051	0.0019	0.0064	692025
rs6973093	7:33499822	BBS9	T/C	0.94563	-0.0106	0.0039	0.0065	675951
rs7777122	7:33438068	BBS9	C/G	0.94849	-0.0107	0.0039	0.0065	676166
rs6497010	15:93479636	CHD2	A/G	0.5305	0.0047	0.0017	0.0065	690002
rs7164668	15:93479291	CHD2	T/C	0.4699	-0.0047	0.0017	0.0065	690068
rs3123510	9:140636333	EHMT1	A/G	0.4174	0.0048	0.0018	0.0065	685652
rs2531741	3:45847458	LZTFL1	A/T	0.5899	-0.0049	0.0018	0.0065	677559
rs6682448	1:243450955	SDCCAG8	T/G	0.6712	-0.005	0.0018	0.0065	692368
rs2064061	3:45871203	LZTFL1	A/G	0.5174	-0.0047	0.0017	0.0066	692542
rs1507995	4:122748308	BBS7	A/G	0.3178	0.0048	0.0018	0.0067	795043
rs1320819	15:93487854	CHD2	C/G	0.4699	-0.0047	0.0017	0.0067	688722
rs2272461	15:93522312	CHD2	A/G	0.6747	-0.0051	0.0019	0.0067	675034
rs8035739	15:93479798	CHD2	T/C	0.5298	0.0047	0.0017	0.0067	689858
rs17574616	5:42436807	GHR	C/G	0.7341	0.0052	0.0019	0.0067	691309
rs4683148	3:45956060	LZTFL1	T/C	0.405	0.0048	0.0018	0.0069	691586
rs850823	15:23888309	MAGEL2	C/G	0.5564	0.0048	0.0018	0.0069	687743
rs6085086	20:5293126	PROKR2	A/G	0.3484	-0.0048	0.0018	0.0069	690766
rs8116536	20:5294461	PROKR2	A/G	0.3482	-0.005	0.0018	0.0069	636086
rs946941	10:112378700	SMC3	T/C	0.09653	0.0083	0.0031	0.0069	660567
rs10485484	20:5278869	PROKR2	A/G	0.6169	0.0048	0.0018	0.007	692211
rs12437674	15:93494026	CHD2	A/T	0.4736	-0.0047	0.0017	0.0071	688056
rs13389366	2:63349951	WDPCP	A/T	0.1983	0.0058	0.0022	0.0071	687713
rs12426026	12:76761610	BBS10	T/C	0.08922	0.0082	0.0031	0.0072	673394
rs11098646	4:122729301	BBS7	T/C	0.6818	-0.005	0.0019	0.0072	692121
rs7167194	15:93491550	CHD2	A/C	0.4746	-0.0046	0.0017	0.0072	688607
rs6863381	5:42520368	GHR	A/T	0.726	0.0052	0.0019	0.0072	690343
rs11140719	9:87271229	NTRK2	T/C	0.95112	0.0107	0.004	0.0072	692311
rs11140810	9:87574808	NTRK2	T/G	0.4633	-0.0047	0.0018	0.0072	690160
rs8920	15:23888891	MAGEL2	A/T	0.4443	-0.0048	0.0018	0.0073	688833
rs3746684	20:5283376	PROKR2	A/G	0.3816	-0.0047	0.0018	0.0073	692351
rs11140802	9:87512376	NTRK2	C/G	0.859	-0.0068	0.0025	0.0074	690128
rs17418241	9:87625848	NTRK2	T/C	0.09606	-0.0079	0.0029	0.0074	690338
rs7272559	20:5286175	PROKR2	A/G	0.3799	-0.0048	0.0018	0.0074	688933
rs4327000	15:93492811	CHD2	C/G	0.4697	-0.0046	0.0017	0.0075	688294
rs17389082	9:87463326	NTRK2	A/G	0.1487	0.0064	0.0024	0.0075	687819
rs17753687	15:72980550	BBS4	T/C	0.07507	-0.0086	0.0032	0.0076	688215
rs11731917	4:122783233	BBS7	A/G	0.3183	0.005	0.0019	0.0076	692105
rs17005251	4:122750340	BBS7	T/C	0.97732	-0.0144	0.0054	0.0076	661566
rs12346884	9:87509739	NTRK2	A/C	0.8585	-0.0068	0.0025	0.0076	690160
rs2141322	11:8067451	TUB	A/G	0.7785	0.0057	0.0021	0.0076	687717
rs12988017	2:64071600	WDPCP	A/G	0.7613	0.0054	0.002	0.0076	688675
rs7686084	4:122764725	BBS7	A/C	0.6823	-0.005	0.0019	0.0077	692288
rs3779241	7:33430008	BBS9	A/G	0.05157	0.0104	0.0039	0.0077	676306
rs7672879	4:122811172	BBS7	A/T	0.3447	-0.0048	0.0018	0.0078	687382
rs11791654	9:87465791	NTRK2	T/G	0.1525	0.0064	0.0024	0.0078	689311
rs6076813	20:5313082	PROKR2	T/C	0.04338	0.0112	0.0042	0.0078	671631
rs7079511	10:112686323	BBIP1	T/C	0.6887	0.0049	0.0019	0.0079	689211
rs2064560	22:41530040	EP300	A/G	0.7172	-0.0051	0.0019	0.0079	692315
rs11818887	10:112335588	SMC3	A/G	0.04636	-0.011	0.0041	0.0079	678089
rs11604511	11:8055436	TUB	T/C	0.7389	0.005	0.0019	0.0079	790523
rs12238423	9:140691283	EHMT1	A/G	0.6919	-0.0058	0.0022	0.008	544110
rs6728488	2:63358260	WDPCP	A/T	0.7972	-0.0058	0.0022	0.008	681328
rs3217753	4:122746325	BBS7	A/G	0.6793	-0.0049	0.0019	0.0081	691871
rs4820428	22:41537589	EP300	A/G	0.718	-0.005	0.0019	0.0081	692454
rs7722558	5:42644063	GHR	T/C	0.8334	0.0061	0.0023	0.0081	685581
rs6038138	20:5316523	PROKR2	A/G	0.607	-0.0047	0.0018	0.0081	684053
rs12592113	15:93458354	CHD2	T/G	0.7819	0.0057	0.0021	0.0082	674171
rs13184352	5:42497622	GHR	T/C	0.2743	-0.0051	0.0019	0.0082	691750
rs12353238	9:87514546	NTRK2	A/C	0.859	-0.0067	0.0025	0.0082	690045
rs2120266	9:87456351	NTRK2	A/G	0.1451	0.0064	0.0024	0.0082	688049
rs3753548	1:243541698	SDCCAG8	A/T	0.7444	-0.0053	0.002	0.0082	682363
rs3217771	4:122739483	BBS7	A/G	0.318	0.0049	0.0019	0.0083	692124
rs12594991	15:93516427	CHD2	A/G	0.5258	0.0046	0.0017	0.0083	686621
rs4146837	15:93446869	CHD2	T/C	0.4653	-0.0048	0.0018	0.0083	619289
rs9611505	22:41540279	EP300	T/C	0.718	-0.005	0.0019	0.0083	692472
rs10123809	9:87530271	NTRK2	A/G	0.1408	0.0067	0.0025	0.0083	688916
rs7911129	10:112340871	SMC3	A/G	0.95358	0.0109	0.0041	0.0083	678087
rs6859653	5:42537284	GHR	T/G	0.2696	-0.0051	0.0019	0.0084	685059
rs7939737	11:8113594	TUB	A/G	0.04671	-0.0106	0.004	0.0084	665468
rs7686200	4:122764553	BBS7	A/G	0.3178	0.0049	0.0019	0.0085	692188
rs3826036	15:93467391	CHD2	T/C	0.4658	-0.0045	0.0017	0.0085	692566
rs13156541	5:42461964	GHR	C/G	0.7344	0.0051	0.0019	0.0085	691717
rs6026560	20:57426528	GNAS	T/C	0.8007	0.0059	0.0023	0.0085	635464
rs2063165	4:122750005	BBS7	A/G	0.6822	-0.0049	0.0019	0.0086	691620
rs2092563	22:41592677	EP300	A/G	0.2803	0.005	0.0019	0.0086	689371
rs1051881	4:122737965	BBS7	C/G	0.01754	0.0154	0.0059	0.0087	771371
rs17636762	5:42462261	GHR	T/C	0.2658	-0.0051	0.0019	0.0087	691717
rs769238	4:122744942	BBS7	A/G	0.3181	0.0049	0.0019	0.0088	691974
rs8035159	15:93407288	CHD2	A/G	0.7041	-0.0047	0.0018	0.0088	774098
rs2028884	2:63812148	WDPCP	A/G	0.8833	-0.0067	0.0026	0.0088	680142
rs7699776	4:122753885	BBS7	A/G	0.6823	-0.0049	0.0019	0.009	692154
rs780110	2:27685388	IFT172	A/G	0.4433	0.0043	0.0016	0.009	795353
rs10941578	5:42543111	GHR	T/C	0.7287	0.0051	0.0019	0.0091	687547
rs13160458	5:42535563	GHR	A/G	0.7303	0.0051	0.0019	0.0092	687284
rs4578034	9:87587782	NTRK2	T/C	0.5507	0.0045	0.0017	0.0092	687818
rs17619598	2:63940612	WDPCP	A/G	0.2335	0.0053	0.002	0.0092	692378
rs17619855	2:63970462	WDPCP	A/T	0.7675	-0.0053	0.002	0.0092	691916
rs1122530	9:87464352	NTRK2	A/G	0.8503	-0.0062	0.0024	0.0093	687628
rs1317500	11:8111121	TUB	T/C	0.07396	0.0089	0.0034	0.0093	663815
rs11041740	11:8117518	TUB	T/G	0.2176	0.0054	0.0021	0.0094	685286
rs4777530	15:73032768	BBS4	A/G	0.09179	-0.0079	0.0031	0.0095	691541
rs4876947	9:140693181	EHMT1	A/G	0.3079	0.0049	0.0019	0.0095	690606
rs17241549	6:100864280	SIM1	C/G	0.94545	0.0089	0.0034	0.0095	639057
rs6836544	4:122726073	BBS7	T/C	0.01719	0.0167	0.0065	0.0096	678002
rs12464279	2:63990744	WDPCP	T/G	0.7298	-0.0051	0.002	0.0096	687865
rs16917426	8:96247835	C8orf37	T/C	0.96749	0.013	0.005	0.0097	668180
rs7005341	8:96249305	C8orf37	A/G	0.96749	0.0129	0.005	0.0097	679957
rs6830453	4:122762824	BBS7	T/C	0.01701	0.0169	0.0065	0.0098	677972
rs12679830	8:38343310	FGFR1	A/T	0.6277	0.0046	0.0018	0.0098	679828
rs3826035	15:93534933	CHD2	A/G	0.531	0.0045	0.0017	0.0099	689893
rs869966	10:112378718	SMC3	T/C	0.90283	-0.0079	0.0031	0.0099	677598
rs11739194	5:132201230	AFF4	T/C	0.6835	0.0047	0.0018	0.01	691292
rs2221628	4:122795361	BBS7	A/G	0.3187	0.0048	0.0019	0.01	692519
rs1441397	8:96267756	C8orf37	T/C	0.0328	-0.0128	0.005	0.01	680711
rs8042437	15:93547575	CHD2	T/C	0.3345	0.0047	0.0018	0.01	689017
rs17136507	16:3800545	CREBBP	T/C	0.91359	-0.0084	0.0033	0.01	662576
rs2057070	22:41564287	EP300	T/C	0.7174	-0.0049	0.0019	0.01	692417
rs12238534	9:87547350	NTRK2	T/G	0.135	-0.0065	0.0026	0.01	689109
rs7875184	9:87501098	NTRK2	T/C	0.1412	0.0065	0.0025	0.01	691200
rs920776	9:87538336	NTRK2	A/G	0.1401	-0.0066	0.0026	0.01	676107
rs6076811	20:5306786	PROKR2	A/G	0.04338	0.011	0.0043	0.01	677654
rs7747189	6:100857869	SIM1	A/G	0.2691	0.0049	0.0019	0.01	692590
rs11815960	10:112343116	SMC3	A/G	0.95375	0.0106	0.0041	0.01	678122
rs6997635	8:100776120	VPS13B	T/C	0.05215	-0.0101	0.0039	0.01	674496
rs1671062	11:66281538	BBS1	A/G	0.3998	0.0046	0.0018	0.011	636861
rs769243	4:122741807	BBS7	T/C	0.01719	0.0164	0.0065	0.011	677814
rs17786463	7:33432951	BBS9	A/T	0.8443	0.0061	0.0024	0.011	691748
rs2109525	7:33411267	BBS9	T/G	0.8402	0.006	0.0024	0.011	692222
rs13290032	9:140620222	EHMT1	A/G	0.6477	-0.0046	0.0018	0.011	685235
rs9611510	22:41569124	EP300	T/C	0.7173	-0.0049	0.0019	0.011	692421
rs4365846	5:42547255	GHR	A/G	0.7449	0.005	0.002	0.011	687945
rs4493680	5:42539166	GHR	A/T	0.2714	-0.0054	0.0021	0.011	524246
rs11130076	3:45853072	LZTFL1	T/C	0.4784	0.0044	0.0017	0.011	687094
rs4815787	20:5281807	PROKR2	A/G	0.505	-0.0044	0.0017	0.011	691804
rs6038132	20:5305400	PROKR2	T/C	0.3852	0.0046	0.0018	0.011	673409
rs6516015	20:5292086	PROKR2	T/C	0.5282	0.0044	0.0017	0.011	690775
rs10803138	1:243555219	SDCCAG8	A/G	0.2558	0.0051	0.002	0.011	683832
rs718268	6:100859159	SIM1	T/C	0.7298	-0.0049	0.0019	0.011	692525
rs12713474	2:63473443	WDPCP	T/C	0.8925	0.0072	0.0028	0.011	691351
rs12991228	2:63485625	WDPCP	C/G	0.1718	-0.0058	0.0023	0.011	690161
rs2034802	2:63968655	WDPCP	A/G	0.04134	0.0108	0.0042	0.011	677130
rs4783941	16:56511736	BBS2	T/C	0.3922	-0.0044	0.0018	0.012	691852
rs3217767	4:122740989	BBS7	A/G	0.01678	0.0165	0.0066	0.012	677847
rs12903587	15:93455471	CHD2	A/G	0.3742	-0.0043	0.0017	0.012	772114
rs20551	22:41548008	EP300	A/G	0.7179	-0.0048	0.0019	0.012	692626
rs10044169	5:42701986	GHR	A/C	0.7248	0.0052	0.0021	0.012	527958
rs6894082	5:42418258	GHR	T/C	0.1829	-0.0055	0.0022	0.012	691254
rs1928284	6:84809517	MRAP2	T/G	0.01655	-0.0172	0.0068	0.012	521204
rs17777716	20:5290375	PROKR2	C/G	0.4723	-0.0043	0.0017	0.012	690732
rs6053287	20:5290627	PROKR2	A/G	0.5277	0.0043	0.0017	0.012	690857
rs6053291	20:5291760	PROKR2	T/C	0.5282	0.0044	0.0017	0.012	683650
rs6085085	20:5290658	PROKR2	T/C	0.5277	0.0043	0.0017	0.012	690854
rs6085088	20:5293919	PROKR2	A/G	0.5277	0.0044	0.0017	0.012	690595
rs8067439	17:17698254	RAI1	A/G	0.6277	0.0051	0.002	0.012	504317
rs7743566	6:100822271	SIM1	A/G	0.2712	0.0048	0.0019	0.012	691362
rs7842833	8:100631262	VPS13B	C/G	0.94756	0.0101	0.004	0.012	674562
rs2421919	2:63477604	WDPCP	A/G	0.8987	0.0071	0.0028	0.012	688372
rs14306	16:56510299	BBS2	A/C	0.3935	-0.0044	0.0018	0.013	691955
rs4784669	16:56481282	BBS2	A/G	0.4093	-0.0043	0.0018	0.013	690845
rs7198524	16:56510601	BBS2	T/C	0.6073	0.0044	0.0018	0.013	691944
rs9929724	16:56535613	BBS2	A/C	0.3923	-0.0044	0.0018	0.013	692288
rs11773450	7:33453711	BBS9	C/G	0.7965	-0.0053	0.0021	0.013	691729
rs2392245	7:33567912	BBS9	T/C	0.3375	0.0045	0.0018	0.013	687135
rs12438635	15:93545934	CHD2	T/C	0.5343	0.0043	0.0017	0.013	690851
rs12554522	9:140692781	EHMT1	A/G	0.3081	0.0047	0.0019	0.013	690152
rs4876899	9:140692336	EHMT1	T/C	0.6932	-0.0046	0.0019	0.013	690841
rs9314635	9:140612997	EHMT1	T/G	0.3808	0.0046	0.0018	0.013	630644
rs10038477	5:42705522	GHR	T/G	0.2752	-0.0052	0.0021	0.013	527913
rs10077296	5:42703486	GHR	A/G	0.7248	0.0052	0.0021	0.013	527911
rs7703713	5:42555931	GHR	A/G	0.2698	-0.0048	0.0019	0.013	692606
rs4665978	2:27648726	IFT172	T/C	0.5565	-0.0041	0.0016	0.013	794759
rs699329	15:23929120	NDN	A/T	0.3267	0.005	0.002	0.013	580926
rs292180	5:36950259	NIPBL	A/G	0.8087	0.0055	0.0022	0.013	691462
rs293748	5:36900843	NIPBL	A/G	0.1812	-0.0056	0.0023	0.013	691638
rs1948308	9:87616257	NTRK2	A/G	0.5625	0.0043	0.0017	0.013	689387
rs11698641	20:5309321	PROKR2	C/G	0.04373	0.0104	0.0042	0.013	686114
rs2145089	20:5283634	PROKR2	A/G	0.4965	0.0043	0.0017	0.013	692283
rs6053281	20:5289644	PROKR2	A/G	0.4726	-0.0043	0.0017	0.013	690689
rs6076807	20:5292188	PROKR2	A/G	0.4709	-0.0043	0.0017	0.013	690710
rs6516020	20:5294034	PROKR2	T/G	0.5277	0.0043	0.0017	0.013	690673
rs8116897	20:5294496	PROKR2	T/C	0.4722	-0.0043	0.0017	0.013	690278
rs2490393	1:243522906	SDCCAG8	A/G	0.2575	0.005	0.002	0.013	678400
rs6703335	1:243608967	SDCCAG8	A/G	0.4338	-0.0043	0.0017	0.013	691916
rs13213077	6:100816614	SIM1	A/C	0.2712	0.0048	0.0019	0.013	690606
rs1553586	6:100820354	SIM1	A/T	0.2711	0.0048	0.0019	0.013	691081
rs4145403	6:100859573	SIM1	T/C	0.2693	0.0048	0.0019	0.013	680778
rs9376940	6:100818915	SIM1	A/G	0.2722	0.0047	0.0019	0.013	690928
rs9376963	6:100848319	SIM1	A/C	0.2698	0.0048	0.0019	0.013	692120
rs2554426	15:25219195	SNURF	T/G	0.08735	0.0076	0.0031	0.013	691737
rs2732020	15:25222304	SNURF	A/C	0.08758	0.0076	0.0031	0.013	691531
rs7566860	2:63564683	WDPCP	T/C	0.8262	0.0057	0.0023	0.013	689253
rs11748063	5:132200943	AFF4	T/C	0.317	-0.0045	0.0018	0.014	692321
rs2015477	2:73847024	ALMS1	A/G	0.93873	-0.0087	0.0035	0.014	728104
rs769245	4:122741584	BBS7	A/T	0.98386	-0.0162	0.0066	0.014	677617
rs17170220	7:33453144	BBS9	A/C	0.7957	-0.0052	0.0021	0.014	691635
rs17170226	7:33460180	BBS9	T/C	0.2034	0.0052	0.0021	0.014	692018
rs17170229	7:33467830	BBS9	T/C	0.2035	0.0052	0.0021	0.014	691671
rs17398949	7:33379807	BBS9	A/T	0.8439	0.0059	0.0024	0.014	690632
rs6965729	7:33459531	BBS9	A/G	0.2034	0.0053	0.0021	0.014	691489
rs10852181	15:93412778	CHD2	C/G	0.1444	0.0062	0.0025	0.014	682973
rs1406714	15:93461371	CHD2	C/G	0.4391	0.0043	0.0017	0.014	688011
rs7170644	15:93559178	CHD2	A/G	0.3118	0.0047	0.0019	0.014	687187
rs7743	15:93441267	CHD2	A/G	0.5648	-0.0044	0.0018	0.014	672158
rs6002271	22:41566595	EP300	T/C	0.2826	0.0047	0.0019	0.014	691555
rs8179219	2:27730817	IFT172	A/G	0.05513	0.0092	0.0037	0.014	778725
rs6514111	20:10383981	MKKS	A/G	0.87	0.0066	0.0027	0.014	680475
rs1778913	9:87435737	NTRK2	A/G	0.237	-0.0049	0.002	0.014	688620
rs7036090	9:87617689	NTRK2	A/G	0.5631	0.0043	0.0017	0.014	688403
rs9314735	9:87445656	NTRK2	A/G	0.7704	0.005	0.002	0.014	681690
rs5012083	20:5289802	PROKR2	C/G	0.5293	0.0042	0.0017	0.014	690589
rs6107614	20:5308321	PROKR2	A/G	0.5803	0.0041	0.0017	0.014	777032
rs7273837	20:5289481	PROKR2	T/C	0.5277	0.0042	0.0017	0.014	690839
rs10927013	1:243589156	SDCCAG8	T/G	0.5679	0.0043	0.0017	0.014	687869
rs4145404	6:100859348	SIM1	T/G	0.1432	0.006	0.0025	0.014	679742
rs9386117	6:100815500	SIM1	C/G	0.2716	0.0047	0.0019	0.014	690102
rs9693641	8:100566950	VPS13B	T/C	0.05227	-0.0095	0.0039	0.014	675562
rs13009368	2:63588244	WDPCP	C/G	0.1693	-0.0056	0.0023	0.014	689418
rs2023895	5:132231528	AFF4	A/G	0.6366	0.0043	0.0018	0.015	692492
rs8432	11:66299515	BBS1	A/G	0.3998	0.0044	0.0018	0.015	637810
rs6738934	2:170377737	BBS5	A/G	0.2702	0.0047	0.0019	0.015	690645
rs11764921	7:33499462	BBS9	T/C	0.2048	0.0052	0.0021	0.015	680356
rs13236885	7:33460336	BBS9	T/C	0.7966	-0.0051	0.0021	0.015	692019
rs17170225	7:33459157	BBS9	A/G	0.2034	0.0051	0.0021	0.015	692017
rs17170247	7:33487446	BBS9	A/G	0.7957	-0.0052	0.0021	0.015	689769
rs7779232	7:33480600	BBS9	A/G	0.8436	0.0058	0.0024	0.015	691697
rs10867068	9:140682881	EHMT1	T/C	0.6916	-0.0046	0.0019	0.015	690998
rs11137225	9:140675956	EHMT1	T/C	0.6916	-0.0045	0.0019	0.015	686428
rs12686658	9:140691516	EHMT1	T/C	0.6921	-0.0046	0.0019	0.015	691334
rs4876945	9:140690515	EHMT1	T/C	0.692	-0.0045	0.0019	0.015	691361
rs4979648	9:140667271	EHMT1	A/G	0.3067	0.0045	0.0019	0.015	685786
rs11090039	22:41496800	EP300	A/G	0.2818	0.0047	0.0019	0.015	689787
rs6861906	5:37075936	NIPBL	T/C	0.8071	0.0054	0.0022	0.015	689990
rs1006446	9:87566393	NTRK2	A/C	0.1432	-0.0061	0.0025	0.015	686994
rs12348710	9:87554605	NTRK2	T/C	0.8649	0.0061	0.0025	0.015	691130
rs7048015	9:87478135	NTRK2	A/C	0.8091	-0.0053	0.0022	0.015	688178
rs6085077	20:5286793	PROKR2	A/G	0.4964	0.0042	0.0017	0.015	689876
rs6085110	20:5314026	PROKR2	A/G	0.95633	-0.0101	0.0042	0.015	677646
rs7744316	6:57081878	RAB23	A/G	0.8044	-0.0055	0.0023	0.015	673485
rs13021852	2:63562115	WDPCP	A/G	0.8089	0.0053	0.0022	0.015	680158
rs2421547	2:73641088	ALMS1	T/G	0.06297	0.0081	0.0034	0.016	792479
rs13230868	7:33449891	BBS9	A/C	0.7963	-0.0051	0.0021	0.016	691626
rs13239022	7:33452002	BBS9	A/G	0.2038	0.0051	0.0021	0.016	691715
rs17170189	7:33370588	BBS9	A/G	0.91043	0.0074	0.0031	0.016	691648
rs6966188	7:33459773	BBS9	A/G	0.2044	0.0051	0.0021	0.016	692106
rs929524	7:33440019	BBS9	A/T	0.7962	-0.0051	0.0021	0.016	691587
rs2304655	15:93435225	CHD2	T/C	0.5645	-0.0042	0.0018	0.016	679823
rs6559225	9:140687468	EHMT1	A/G	0.6919	-0.0045	0.0019	0.016	692329
rs4395642	5:42552431	GHR	T/C	0.254	-0.0048	0.002	0.016	690861
rs11168828	12:49422795	KMT2D	A/G	0.08378	-0.0087	0.0036	0.016	594668
rs4683142	3:45852376	LZTFL1	C/G	0.8007	0.0052	0.0022	0.016	685640
rs1547	20:10386059	MKKS	A/G	0.1098	-0.0066	0.0027	0.016	692597
rs2480207	6:84817365	MRAP2	A/G	0.98287	0.0163	0.0068	0.016	517414
rs11140803	9:87512669	NTRK2	A/G	0.1748	0.0059	0.0025	0.016	675407
rs729705	9:87440490	NTRK2	A/G	0.228	-0.0049	0.002	0.016	686555
rs6053298	20:5295475	PROKR2	A/G	0.5294	0.0042	0.0017	0.016	688063
rs1506082	6:100819748	SIM1	C/G	0.7244	-0.0046	0.0019	0.016	679282
rs1506083	6:100819234	SIM1	A/T	0.729	-0.0047	0.0019	0.016	679240
rs9390325	6:100817828	SIM1	T/C	0.2711	0.0047	0.0019	0.016	678967
rs10037865	5:132230024	AFF4	A/G	0.7982	0.0054	0.0023	0.017	671344
rs1410057	10:112691147	BBIP1	C/G	0.2354	-0.0048	0.002	0.017	691290
rs370151	16:56561494	BBS2	T/G	0.6147	0.0042	0.0018	0.017	691812
rs1803183	4:122735142	BBS7	A/G	0.98293	-0.0143	0.006	0.017	766505
rs10486530	7:33398033	BBS9	A/G	0.7958	-0.0051	0.0021	0.017	691898
rs11769616	7:33392380	BBS9	A/G	0.7965	-0.0051	0.0021	0.017	691880
rs11773504	7:33388713	BBS9	A/G	0.2043	0.0051	0.0021	0.017	685123
rs13234292	7:33417120	BBS9	A/T	0.203	0.0051	0.0021	0.017	691394
rs17170253	7:33494963	BBS9	T/C	0.205	0.0051	0.0021	0.017	689267
rs11634566	15:93530415	CHD2	A/G	0.4685	-0.0041	0.0017	0.017	690117
rs7023287	9:140689373	EHMT1	A/G	0.3081	0.0045	0.0019	0.017	692318
rs1545	20:10386013	MKKS	A/C	0.1093	-0.0065	0.0027	0.017	692471
rs6108553	20:10386737	MKKS	A/T	0.1093	-0.0065	0.0027	0.017	692516
rs1187287	9:87414794	NTRK2	A/G	0.2012	-0.0051	0.0021	0.017	692435
rs1187332	9:87269362	NTRK2	A/G	0.1415	-0.0059	0.0025	0.017	686601
rs12342902	9:87554440	NTRK2	T/C	0.1355	-0.0061	0.0025	0.017	690195
rs6053299	20:5295770	PROKR2	A/G	0.5289	0.0041	0.0017	0.017	688261
rs17619717	2:63943257	WDPCP	A/G	0.4197	-0.0042	0.0017	0.017	689291
rs6546008	2:63733387	WDPCP	A/G	0.0397	0.0103	0.0044	0.017	670372
rs1671063	11:66272142	BBS1	A/G	0.4014	0.0042	0.0018	0.018	691347
rs3217773	4:122739121	BBS7	A/G	0.682	-0.0045	0.0019	0.018	636622
rs10464225	7:33438036	BBS9	A/G	0.2047	0.005	0.0021	0.018	691664
rs12056267	7:33483245	BBS9	A/G	0.2046	0.005	0.0021	0.018	689770
rs1419923	7:33488262	BBS9	A/C	0.2048	0.0051	0.0021	0.018	689829
rs17170246	7:33484983	BBS9	T/C	0.7952	-0.005	0.0021	0.018	689855
rs4723274	7:33235084	BBS9	T/C	0.3446	0.0043	0.0018	0.018	689085
rs6968365	7:33418118	BBS9	A/G	0.7961	-0.005	0.0021	0.018	691342
rs1045777	9:140512555	EHMT1	A/G	0.1939	0.0053	0.0022	0.018	687285
rs11137226	9:140678227	EHMT1	T/C	0.6917	-0.0044	0.0019	0.018	692328
rs12004293	9:140677678	EHMT1	T/C	0.6911	-0.0044	0.0019	0.018	692320
rs12521020	5:42565843	GHR	T/C	0.2695	-0.0046	0.0019	0.018	690644
rs2972393	5:42496257	GHR	A/G	0.4282	-0.0041	0.0017	0.018	689795
rs7735889	5:42562199	GHR	A/G	0.7296	0.0046	0.0019	0.018	691557
rs13831	20:57475191	GNAS	A/G	0.297	0.0046	0.0019	0.018	687540
rs9548	9:139317823	INPP5E	T/C	0.176	0.0053	0.0022	0.018	692071
rs6104602	20:10388941	MKKS	T/C	0.8907	0.0065	0.0027	0.018	692507
rs6108546	20:10384115	MKKS	T/C	0.8892	0.0064	0.0027	0.018	692554
rs6108561	20:10396488	MKKS	T/C	0.8907	0.0065	0.0027	0.018	692582
rs6133907	20:10388506	MKKS	A/G	0.1093	-0.0065	0.0027	0.018	692603
rs6133915	20:10392273	MKKS	A/G	0.1089	-0.0065	0.0027	0.018	692605
rs6133919	20:10396101	MKKS	T/C	0.8907	0.0065	0.0027	0.018	692582
rs6133921	20:10400753	MKKS	A/G	0.8908	0.0065	0.0027	0.018	692526
rs11140771	9:87443362	NTRK2	A/G	0.2304	-0.005	0.0021	0.018	673414
rs12340212	9:87551964	NTRK2	A/G	0.1394	-0.006	0.0025	0.018	687813
rs1443441	9:87405888	NTRK2	T/C	0.7028	0.0046	0.0019	0.018	672338
rs17087789	9:87478710	NTRK2	T/C	0.8402	-0.0056	0.0023	0.018	689223
rs3780634	9:87488718	NTRK2	A/G	0.8397	-0.0055	0.0023	0.018	692169
rs11819139	10:112331272	SMC3	A/G	0.04636	-0.0093	0.0039	0.018	725819
rs17700521	14:89315875	TTC8	C/G	0.7298	0.0046	0.002	0.018	690714
rs4318375	2:64044827	WDPCP	T/C	0.5256	0.0041	0.0017	0.018	687472
rs2683450	2:170384622	BBS5	A/C	0.3963	0.0041	0.0018	0.019	690636
rs10486525	7:33320441	BBS9	T/C	0.08665	-0.0072	0.0031	0.019	692521
rs10486529	7:33396752	BBS9	A/G	0.2044	0.005	0.0021	0.019	691967
rs11763712	7:33392965	BBS9	A/G	0.2031	0.005	0.0021	0.019	691842
rs11764582	7:33386455	BBS9	A/G	0.7956	-0.005	0.0021	0.019	691851
rs12155389	7:33357730	BBS9	A/G	0.08618	-0.0072	0.0031	0.019	691284
rs1419899	7:33408832	BBS9	A/G	0.7946	-0.005	0.0021	0.019	691857
rs4270863	7:33389239	BBS9	T/C	0.2043	0.005	0.0021	0.019	691995
rs17525249	15:93472980	CHD2	T/C	0.91546	0.0074	0.0031	0.019	690910
rs10780189	9:140678034	EHMT1	A/G	0.3069	0.0044	0.0019	0.019	692214
rs10867062	9:140659404	EHMT1	A/C	0.6919	-0.0044	0.0019	0.019	690639
rs11137223	9:140673666	EHMT1	A/G	0.6917	-0.0044	0.0019	0.019	692150
rs3934534	9:140694542	EHMT1	T/C	0.2827	0.0045	0.0019	0.019	681085
rs6559222	9:140684139	EHMT1	T/C	0.6919	-0.0044	0.0019	0.019	692292
rs17574650	5:42436916	GHR	A/C	0.8946	-0.0068	0.0029	0.019	673767
rs7707913	5:42584852	GHR	T/C	0.251	-0.0046	0.002	0.019	687002
rs13433220	20:10400313	MKKS	A/G	0.8907	0.0064	0.0027	0.019	692596
rs13433221	20:10400280	MKKS	T/C	0.1093	-0.0064	0.0027	0.019	692596
rs16991547	20:10394046	MKKS	A/G	0.1118	-0.0064	0.0027	0.019	692380
rs6108563	20:10398889	MKKS	A/C	0.8907	0.0065	0.0027	0.019	692572
rs1078947	9:87563252	NTRK2	T/C	0.1437	-0.0059	0.0025	0.019	688552
rs1662701	9:87433151	NTRK2	T/G	0.228	-0.0048	0.002	0.019	688251
rs2378676	9:87619423	NTRK2	A/C	0.4394	-0.0041	0.0017	0.019	688446
rs3800019	6:57068940	RAB23	A/G	0.2	0.0053	0.0023	0.019	640625
rs6469661	8:117841045	RAD21	T/C	0.4711	-0.0041	0.0017	0.019	680397
rs9403748	6:100855214	SIM1	T/C	0.1433	0.0057	0.0024	0.019	680848
rs10787292	10:112697241	BBIP1	T/C	0.7631	0.0047	0.002	0.02	691697
rs10951387	7:33393486	BBS9	A/G	0.7957	-0.0049	0.0021	0.02	691979
rs1419922	7:33489728	BBS9	A/G	0.2048	0.005	0.0021	0.02	689814
rs734531	7:33596976	BBS9	C/G	0.8859	-0.0065	0.0028	0.02	685640
rs17609875	15:93463272	CHD2	A/C	0.08396	-0.0074	0.0032	0.02	688594
rs4496716	5:42582377	GHR	T/G	0.7304	0.0049	0.0021	0.02	525190
rs10870144	9:139306467	INPP5E	T/C	0.1763	0.0052	0.0022	0.02	691742
rs6108559	20:10392179	MKKS	T/C	0.1093	-0.0064	0.0027	0.02	692574
rs6108564	20:10398933	MKKS	T/C	0.1093	-0.0064	0.0027	0.02	692606
rs6108565	20:10398974	MKKS	T/C	0.1093	-0.0064	0.0027	0.02	692606
rs6131089	20:10395936	MKKS	A/G	0.8907	0.0064	0.0027	0.02	692603
rs6133917	20:10393162	MKKS	A/C	0.8908	0.0064	0.0027	0.02	692563
rs10512154	9:87441475	NTRK2	A/G	0.2285	-0.0047	0.002	0.02	686472
rs11795386	9:87602898	NTRK2	T/C	0.1522	-0.0056	0.0024	0.02	689049
rs1187333	9:87266352	NTRK2	A/G	0.1416	-0.0057	0.0025	0.02	692392
rs12002424	9:87480828	NTRK2	T/C	0.8406	-0.0055	0.0023	0.02	689870
rs3860945	9:87585624	NTRK2	A/G	0.8435	0.0056	0.0024	0.02	692207
rs9403709	6:100822187	SIM1	A/C	0.1446	0.0057	0.0024	0.02	691500
rs10206458	2:63462632	WDPCP	A/G	0.5708	-0.0044	0.0019	0.02	526189
rs12991311	2:63962907	WDPCP	T/C	0.5737	0.004	0.0017	0.02	690514
rs13013948	2:63344312	WDPCP	T/C	0.8824	0.0063	0.0027	0.02	688665
rs2421860	2:63375950	WDPCP	T/C	0.7575	-0.0047	0.002	0.02	686265
rs7597935	2:63993230	WDPCP	T/C	0.5759	0.004	0.0017	0.02	689501
rs10038027	5:132230745	AFF4	A/T	0.6366	0.0039	0.0017	0.021	787780
rs7895872	10:112678657	BBIP1	T/G	0.7442	0.0046	0.002	0.021	690456
rs11072383	15:72996259	BBS4	A/G	0.1471	-0.0057	0.0025	0.021	692163
rs7170394	15:72997686	BBS4	T/C	0.8531	0.0057	0.0025	0.021	691723
rs17170203	7:33399116	BBS9	C/G	0.2045	0.0049	0.0021	0.021	691895
rs17610360	15:93524850	CHD2	C/G	0.08168	-0.0075	0.0033	0.021	689634
rs964034	15:93563661	CHD2	C/G	0.8756	0.0063	0.0027	0.021	660997
rs11137208	9:140657950	EHMT1	A/G	0.3079	0.0045	0.0019	0.021	636270
rs4876902	9:140710603	EHMT1	T/C	0.2216	0.0048	0.0021	0.021	685822
rs6896667	5:42581155	GHR	T/C	0.7304	0.0045	0.0019	0.021	688804
rs11130077	3:45877712	LZTFL1	A/G	0.6154	0.0041	0.0018	0.021	688676
rs6104605	20:10397145	MKKS	A/T	0.8902	0.0063	0.0027	0.021	692374
rs6108560	20:10392778	MKKS	T/C	0.1097	-0.0063	0.0027	0.021	692329
rs6108567	20:10402480	MKKS	T/C	0.8909	0.0063	0.0027	0.021	692552
rs6108568	20:10402718	MKKS	T/C	0.8909	0.0063	0.0027	0.021	692564
rs6133923	20:10402908	MKKS	T/C	0.8909	0.0063	0.0027	0.021	692572
rs11790194	9:87553334	NTRK2	A/G	0.04537	0.0097	0.0042	0.021	690497
rs12000339	9:87480759	NTRK2	C/G	0.8389	-0.0054	0.0023	0.021	689854
rs7816	9:87430521	NTRK2	A/T	0.7525	0.0047	0.002	0.021	689313
rs4813739	20:5299696	PROKR2	A/G	0.6704	-0.0044	0.0019	0.021	676083
rs10803142	1:243598234	SDCCAG8	A/G	0.5288	0.004	0.0017	0.021	687079
rs2039839	1:243598670	SDCCAG8	A/G	0.4328	-0.004	0.0017	0.021	689396
rs17060441	6:100823189	SIM1	T/G	0.8551	-0.0056	0.0024	0.021	691726
rs9322026	6:100820726	SIM1	A/G	0.1448	0.0056	0.0024	0.021	691471
rs9399548	6:100820524	SIM1	A/G	0.1448	0.0056	0.0024	0.021	691456
rs9403732	6:100831997	SIM1	A/G	0.1452	0.0056	0.0024	0.021	691603
rs11823329	11:8080866	TUB	A/G	0.2161	-0.0049	0.0021	0.021	677944
rs6742187	2:63991959	WDPCP	T/C	0.5759	0.004	0.0017	0.021	689540
rs2304598	15:73048529	BBS4	A/G	0.1477	-0.0056	0.0025	0.022	688402
rs7172397	15:72993458	BBS4	T/C	0.1469	-0.0056	0.0025	0.022	692059
rs10249379	7:33492280	BBS9	T/G	0.98433	0.0154	0.0067	0.022	650235
rs13234403	7:33477351	BBS9	T/C	0.7954	-0.0049	0.0021	0.022	690216
rs4442031	7:33355239	BBS9	A/G	0.93259	-0.0076	0.0033	0.022	787303
rs7798118	7:33311464	BBS9	A/G	0.91335	0.007	0.0031	0.022	692577
rs12907473	15:93454250	CHD2	A/G	0.4156	-0.0041	0.0018	0.022	671400
rs130023	16:3833306	CREBBP	A/G	0.9727	-0.0108	0.0047	0.022	620779
rs11740415	5:42582527	GHR	T/C	0.2516	-0.0045	0.002	0.022	688079
rs850818	15:23893311	MAGEL2	A/G	0.4835	-0.0042	0.0018	0.022	623351
rs6131092	20:10403106	MKKS	A/G	0.8909	0.0063	0.0027	0.022	692572
rs4877892	9:87560461	NTRK2	C/G	0.04531	0.0096	0.0042	0.022	690769
rs1374913	3:71812098	PROK2	T/G	0.3156	-0.0043	0.0019	0.022	684486
rs7824338	8:117850062	RAD21	A/G	0.532	-0.004	0.0017	0.022	692083
rs1395122	6:100865806	SIM1	T/G	0.1433	0.0056	0.0025	0.022	691651
rs3798502	6:100859189	SIM1	A/G	0.8568	-0.0056	0.0025	0.022	680680
rs9376967	6:100857565	SIM1	A/T	0.8585	-0.0056	0.0025	0.022	680680
rs1048190	14:89343992	TTC8	A/G	0.2703	-0.0045	0.002	0.022	690396
rs13006124	2:63961179	WDPCP	A/C	0.5741	0.004	0.0017	0.022	690517
rs2421917	2:63449512	WDPCP	T/C	0.90844	0.007	0.003	0.022	692570
rs10043647	5:132230891	AFF4	A/C	0.2018	-0.0049	0.0022	0.023	692503
rs719358	4:123675669	BBS12	T/C	0.98088	-0.0149	0.0066	0.023	666469
rs12594320	15:73006950	BBS4	A/G	0.8531	0.0056	0.0025	0.023	689782
rs4723278	7:33364482	BBS9	A/C	0.1998	0.0053	0.0023	0.023	525398
rs10732688	9:140581700	EHMT1	T/G	0.6933	0.0043	0.0019	0.023	685547
rs4247463	9:140667227	EHMT1	A/G	0.6902	-0.0042	0.0019	0.023	690094
rs11739444	5:42581444	GHR	T/C	0.251	-0.0045	0.002	0.023	688054
rs11949751	5:42569585	GHR	A/G	0.7302	0.0044	0.0019	0.023	689602
rs11955075	5:42580760	GHR	A/C	0.7488	0.0045	0.002	0.023	688132
rs7736209	5:42577559	GHR	T/C	0.2518	-0.0045	0.002	0.023	688382
rs3765449	20:10388070	MKKS	T/C	0.1093	-0.0063	0.0028	0.023	686734
rs11790615	9:87553479	NTRK2	T/C	0.03683	0.0109	0.0048	0.023	681044
rs1187286	9:87415028	NTRK2	T/G	0.7613	0.0046	0.002	0.023	691803
rs3780642	9:87553145	NTRK2	T/G	0.95463	-0.0096	0.0042	0.023	690427
rs4758040	11:8101173	TUB	T/C	0.5384	-0.0039	0.0017	0.023	692532
rs6545978	2:63398117	WDPCP	T/C	0.91043	0.007	0.0031	0.023	689684
rs17166297	5:132203997	AFF4	A/G	0.7965	0.0049	0.0021	0.024	692354
rs12906007	15:72985891	BBS4	T/C	0.1469	-0.0056	0.0025	0.024	689870
rs9886317	7:33175874	BBS9	A/C	0.1814	0.0054	0.0024	0.024	528832
rs961233	15:93473624	CHD2	T/C	0.548	-0.0039	0.0017	0.024	690814
rs3125792	9:140650472	EHMT1	A/G	0.3419	0.0042	0.0018	0.024	688840
rs10061833	5:42706757	GHR	T/G	0.2752	-0.0044	0.0019	0.024	690103
rs6179	5:42700044	GHR	A/G	0.2753	-0.0044	0.0019	0.024	690830
rs6133904	20:10382822	MKKS	T/G	0.1108	-0.0062	0.0027	0.024	692213
rs17087884	9:87548647	NTRK2	A/C	0.95352	-0.0095	0.0042	0.024	690455
rs3780645	9:87559794	NTRK2	T/C	0.04531	0.0096	0.0042	0.024	679004
rs10061901	5:132295278	AFF4	A/C	0.204	-0.0048	0.0022	0.025	691989
rs3822760	5:132210510	AFF4	A/C	0.202	-0.0048	0.0021	0.025	692264
rs765760	5:132208861	AFF4	T/C	0.2017	-0.0048	0.0021	0.025	692417
rs3769771	2:170368438	BBS5	T/C	0.1297	-0.0054	0.0024	0.025	795528
rs1362368	7:33197232	BBS9	A/C	0.4223	0.0039	0.0017	0.025	692495
rs1318689	15:93473752	CHD2	T/C	0.4515	0.0039	0.0017	0.025	691201
rs4876946	9:140693036	EHMT1	C/G	0.2753	0.0044	0.002	0.025	687049
rs4876948	9:140694331	EHMT1	T/C	0.1244	0.006	0.0027	0.025	683537
rs4821998	22:41468273	EP300	C/G	0.7197	-0.0043	0.0019	0.025	690848
rs13248631	8:38260815	FGFR1	T/C	0.4524	-0.0039	0.0018	0.025	687394
rs10074740	5:42698658	GHR	T/G	0.2752	-0.0043	0.0019	0.025	690398
rs4242119	5:42712343	GHR	A/G	0.2753	-0.0043	0.0019	0.025	690714
rs6133927	20:10406156	MKKS	A/G	0.8905	0.0061	0.0027	0.025	692211
rs9376959	6:100845429	SIM1	T/C	0.1438	0.0055	0.0024	0.025	680870
rs11694709	2:64022996	WDPCP	A/G	0.2748	0.0043	0.0019	0.025	686664
rs2421918	2:63471266	WDPCP	T/C	0.08583	-0.0069	0.0031	0.025	691874
rs11739417	5:132228133	AFF4	A/G	0.7982	0.0048	0.0021	0.026	692509
rs1362370	7:33276017	BBS9	A/G	0.91324	0.0068	0.0031	0.026	692073
rs4723263	7:33194826	BBS9	C/G	0.4221	0.0039	0.0017	0.026	692050
rs6973114	7:33256744	BBS9	T/C	0.91248	0.0068	0.0031	0.026	691872
rs961679	7:33458535	BBS9	A/G	0.7915	-0.0047	0.0021	0.026	692325
rs9639675	7:33465994	BBS9	A/C	0.2088	0.0047	0.0021	0.026	691826
rs4273617	5:42695471	GHR	A/G	0.7247	0.0043	0.0019	0.026	690315
rs4547964	5:42680096	GHR	A/G	0.7315	0.0045	0.002	0.026	684895
rs4866948	5:42707386	GHR	A/G	0.2752	-0.0043	0.0019	0.026	690813
rs8121252	20:57476809	GNAS	T/C	0.338	0.0042	0.0019	0.026	684618
rs1058961	3:45865006	LZTFL1	T/C	0.35	-0.004	0.0018	0.026	689942
rs1374912	3:71811875	PROK2	A/G	0.6835	0.0042	0.0019	0.026	684913
rs4813740	20:5299893	PROKR2	A/G	0.3319	0.0042	0.0019	0.026	680957
rs10872578	6:100833779	SIM1	T/C	0.1448	0.0054	0.0024	0.026	680125
rs6578921	11:8094502	TUB	A/G	0.6161	-0.004	0.0018	0.026	679505
rs1852909	2:63468274	WDPCP	A/T	0.08583	-0.0068	0.0031	0.026	691523
rs10060215	5:132275078	AFF4	T/G	0.7982	0.0048	0.0022	0.027	692227
rs10479013	5:132244786	AFF4	A/G	0.2021	-0.0048	0.0022	0.027	684894
rs8026695	15:93467354	CHD2	T/G	0.5425	-0.0038	0.0017	0.027	691606
rs10780180	9:140551863	EHMT1	C/G	0.7987	-0.0049	0.0022	0.027	683973
rs7718962	5:42463380	GHR	C/G	0.2027	-0.0047	0.0021	0.027	691964
rs6133902	20:10379471	MKKS	A/G	0.1113	-0.006	0.0027	0.027	691505
rs1187280	9:87416825	NTRK2	A/G	0.2078	-0.0047	0.0021	0.027	688801
rs17334250	9:87657989	NTRK2	A/C	0.8427	0.0053	0.0024	0.027	691555
rs2289657	9:87563460	NTRK2	A/C	0.04432	0.0093	0.0042	0.027	690744
rs7831963	8:100865242	VPS13B	A/G	0.8257	-0.005	0.0023	0.027	692598
rs6704998	2:63591775	WDPCP	T/G	0.815	0.0049	0.0022	0.027	691003
rs7728569	5:132243975	AFF4	T/G	0.798	0.0047	0.0022	0.028	692100
rs6715316	2:73663205	ALMS1	A/G	0.06326	0.0078	0.0035	0.028	692306
rs2392229	7:33173539	BBS9	A/G	0.91365	0.0067	0.0031	0.028	692107
rs6952244	7:33290258	BBS9	T/C	0.9133	0.0067	0.003	0.028	692407
rs6969284	7:33289852	BBS9	A/C	0.0867	-0.0067	0.003	0.028	692399
rs7703669	5:42438161	GHR	A/G	0.7976	0.0046	0.0021	0.028	692165
rs1187283	9:87416027	NTRK2	A/G	0.2429	-0.0044	0.002	0.028	689784
rs2277192	9:87573977	NTRK2	A/G	0.8541	0.0055	0.0025	0.028	667958
rs2289658	9:87563370	NTRK2	T/C	0.95416	-0.0092	0.0042	0.028	690644
rs4877893	9:87565405	NTRK2	T/G	0.95504	-0.0093	0.0042	0.028	690678
rs6038131	20:5301313	PROKR2	A/G	0.3316	0.0041	0.0019	0.028	680637
rs6053306	20:5301501	PROKR2	A/G	0.6683	-0.0041	0.0019	0.028	680609
rs2421549	2:73658573	ALMS1	T/C	0.06326	0.0077	0.0035	0.029	691735
rs10787287	10:112647195	BBIP1	T/C	0.7685	0.0045	0.002	0.029	689931
rs16879114	7:33257641	BBS9	A/T	0.08735	-0.0067	0.0031	0.029	686064
rs4538777	7:33271122	BBS9	A/G	0.08717	-0.0067	0.0031	0.029	691978
rs12904071	15:93455031	CHD2	C/G	0.5841	0.0039	0.0018	0.029	668597
rs3934533	9:140694664	EHMT1	A/C	0.7104	-0.0042	0.0019	0.029	687218
rs12153009	5:42553879	GHR	A/G	0.2993	0.0041	0.0019	0.029	692566
rs2972780	5:42714850	GHR	T/C	0.267	-0.0043	0.002	0.029	690636
rs6133928	20:10407136	MKKS	A/G	0.8914	0.006	0.0028	0.029	692106
rs11788800	9:87562919	NTRK2	A/T	0.95568	-0.0093	0.0043	0.029	678975
rs11791017	9:87654600	NTRK2	C/G	0.8425	0.0052	0.0024	0.029	691651
rs11794678	9:87554134	NTRK2	A/G	0.95463	-0.0092	0.0042	0.029	690389
rs4658566	1:243566904	SDCCAG8	A/G	0.06238	-0.0078	0.0036	0.029	678559
rs1354683	6:100832367	SIM1	T/C	0.1448	0.0053	0.0024	0.029	680108
rs9376960	6:100845644	SIM1	A/G	0.8562	-0.0054	0.0024	0.029	680631
rs7832488	8:100865413	VPS13B	A/G	0.174	0.005	0.0023	0.029	692372
rs262496	2:63849491	WDPCP	T/C	0.7307	-0.0043	0.002	0.029	688460
rs2160253	7:33230874	BBS9	T/C	0.8114	-0.0048	0.0022	0.03	689536
rs6944559	7:33280247	BBS9	A/G	0.91324	0.0066	0.0031	0.03	691945
rs7793719	7:33370992	BBS9	T/C	0.1492	-0.0053	0.0024	0.03	689035
rs12908968	15:93454382	CHD2	T/C	0.4159	-0.0039	0.0018	0.03	671209
rs7858355	9:140680789	EHMT1	T/C	0.283	0.0042	0.0019	0.03	691259
rs17575164	5:42471017	GHR	T/C	0.7959	0.0046	0.0021	0.03	691876
rs6883523	5:42564748	GHR	T/G	0.1923	-0.0048	0.0022	0.03	689696
rs4683145	3:45864481	LZTFL1	A/G	0.7692	0.0044	0.002	0.03	689618
rs1073049	9:87647100	NTRK2	T/C	0.842	0.0052	0.0024	0.03	689015
rs1419245	9:87346919	NTRK2	T/C	0.95574	0.009	0.0042	0.03	691020
rs9886759	9:87657757	NTRK2	A/G	0.1573	-0.0052	0.0024	0.03	691506
rs1316853	3:71837036	PROK2	T/C	0.03157	-0.0109	0.005	0.03	654114
rs6085074	20:5270264	PROKR2	T/G	0.03473	0.0104	0.0048	0.03	666503
rs17170232	7:33472460	BBS9	C/G	0.08565	-0.0067	0.0031	0.031	689871
rs4628178	7:33273638	BBS9	A/T	0.08735	-0.0066	0.0031	0.031	691906
rs6943198	7:33191622	BBS9	A/G	0.91335	0.0066	0.0031	0.031	692024
rs6973552	7:33294271	BBS9	T/C	0.91318	0.0066	0.003	0.031	692251
rs7795704	7:33211050	BBS9	T/C	0.08659	-0.0066	0.0031	0.031	691997
rs17525144	15:93460255	CHD2	A/G	0.08396	-0.0068	0.0032	0.031	689138
rs13283365	9:140679695	EHMT1	C/G	0.283	0.0041	0.0019	0.031	691203
rs6474354	8:38302965	FGFR1	T/C	0.2053	-0.0047	0.0022	0.031	680850
rs10805665	5:42711940	GHR	A/G	0.7357	0.0042	0.0019	0.031	690926
rs12211700	6:84738198	MRAP2	A/G	0.255	-0.0044	0.002	0.031	670743
rs1221	9:87492610	NTRK2	T/C	0.1596	0.0051	0.0023	0.031	691446
rs12210597	6:57077135	RAB23	A/G	0.8031	-0.0047	0.0022	0.031	686020
rs803939	9:119453455	TRIM32	T/C	0.5292	-0.0035	0.0016	0.031	794124
rs10479014	5:132283857	AFF4	T/C	0.2046	-0.0046	0.0022	0.032	692194
rs7710795	5:132279016	AFF4	T/C	0.1997	-0.0046	0.0022	0.032	692239
rs7732635	5:132193106	AFF4	A/G	0.8279	0.0048	0.0023	0.032	692038
rs6585021	10:112650055	BBIP1	T/C	0.1035	-0.0059	0.0027	0.032	794843
rs17170212	7:33428905	BBS9	A/T	0.0839	-0.0067	0.0031	0.032	690641
rs7799346	7:33312020	BBS9	A/G	0.08647	-0.0065	0.003	0.032	692468
rs10867065	9:140660585	EHMT1	A/G	0.7184	-0.0041	0.0019	0.032	689538
rs13171720	5:42442715	GHR	T/C	0.2024	-0.0045	0.0021	0.032	692246
rs17574527	5:42436043	GHR	C/G	0.7974	0.0045	0.0021	0.032	691634
rs2910878	5:42715499	GHR	A/G	0.267	-0.0042	0.002	0.032	690744
rs6026574	20:57456495	GNAS	A/T	0.6693	-0.0041	0.0019	0.032	670796
rs6076803	20:5287432	PROKR2	T/G	0.4967	0.004	0.0019	0.032	526512
rs13411767	2:63401230	WDPCP	T/C	0.5744	-0.0037	0.0017	0.032	686939
rs7595595	2:63380809	WDPCP	A/G	0.90873	0.0065	0.003	0.032	688902
rs17170217	7:33441870	BBS9	T/C	0.91394	0.0066	0.0031	0.033	691773
rs11076785	16:3790186	CREBBP	T/G	0.3209	0.004	0.0019	0.033	676626
rs1776776	9:140497072	EHMT1	T/C	0.8665	-0.006	0.0028	0.033	527321
rs10038285	5:42689540	GHR	A/G	0.7353	0.0043	0.002	0.033	636157
rs555269	6:84726156	MRAP2	T/C	0.2582	-0.0042	0.002	0.033	691736
rs6502615	17:17612023	RAI1	T/C	0.4282	0.0035	0.0016	0.033	793773
rs17348120	2:63434271	WDPCP	A/T	0.4248	0.0037	0.0017	0.033	688458
rs10491279	5:132198100	AFF4	T/C	0.1731	-0.0048	0.0023	0.034	692088
rs17166294	5:132201897	AFF4	T/C	0.8339	0.0049	0.0023	0.034	690194
rs7809235	7:33256416	BBS9	A/G	0.91254	0.0065	0.0031	0.034	691360
rs987501	7:33239524	BBS9	T/C	0.8129	-0.0046	0.0022	0.034	690469
rs11076783	16:3782705	CREBBP	T/C	0.06192	0.0078	0.0037	0.034	664593
rs11137219	9:140664865	EHMT1	A/G	0.6901	-0.004	0.0019	0.034	689333
rs11792856	9:87563188	NTRK2	A/G	0.03221	0.0106	0.005	0.034	689771
rs4758293	11:8129433	TUB	C/G	0.04695	-0.009	0.0043	0.034	582629
rs6468695	8:100869351	VPS13B	A/G	0.8258	-0.0049	0.0023	0.034	637458
rs10240664	7:33233222	BBS9	T/C	0.1877	0.0046	0.0022	0.035	690641
rs10951377	7:33182201	BBS9	A/C	0.8191	-0.0046	0.0022	0.035	692206
rs17170140	7:33292381	BBS9	A/G	0.0867	-0.0064	0.003	0.035	691621
rs7034879	9:140661826	EHMT1	T/G	0.6893	-0.004	0.0019	0.035	689186
rs4683143	3:45855172	LZTFL1	T/C	0.3718	-0.0036	0.0017	0.035	774253
rs1928283	6:84807168	MRAP2	A/G	0.98679	0.0138	0.0065	0.035	667729
rs12378021	9:87635540	NTRK2	T/C	0.1751	-0.0046	0.0022	0.035	793215
rs11785240	8:100621749	VPS13B	A/C	0.97661	0.0113	0.0054	0.035	660888
rs7601558	2:63482704	WDPCP	T/C	0.91376	0.0065	0.0031	0.035	691354
rs12713782	2:73659734	ALMS1	A/G	0.06291	0.0076	0.0036	0.036	690982
rs9937444	16:56543558	BBS2	A/G	0.3801	-0.0037	0.0018	0.036	687289
rs10951376	7:33182139	BBS9	T/C	0.8185	-0.0046	0.0022	0.036	692207
rs11760829	7:33184040	BBS9	A/G	0.1816	0.0046	0.0022	0.036	692185
rs13244450	7:33185609	BBS9	T/C	0.8184	-0.0046	0.0022	0.036	692286
rs11137221	9:140666521	EHMT1	T/G	0.6899	-0.0039	0.0019	0.036	689294
rs10041108	5:42705662	GHR	A/T	0.2393	-0.0046	0.0022	0.036	528038
rs10041130	5:42705697	GHR	A/T	0.2507	-0.0042	0.002	0.036	690637
rs4480754	15:23886941	MAGEL2	T/G	0.7323	-0.004	0.0019	0.036	753581
rs6107615	20:5310273	PROKR2	T/C	0.5793	0.0037	0.0018	0.036	676366
rs7113729	11:8089121	TUB	T/C	0.5637	-0.0037	0.0017	0.036	687262
rs11782133	8:100735828	VPS13B	A/G	0.02853	-0.011	0.0053	0.036	653346
rs17624157	5:132204031	AFF4	A/G	0.1618	-0.0048	0.0023	0.037	690005
rs10240165	7:33167729	BBS9	A/G	0.1812	0.005	0.0024	0.037	540225
rs1029852	7:33409323	BBS9	T/C	0.91528	0.0065	0.0031	0.037	691963
rs11766521	7:33196637	BBS9	T/C	0.8185	-0.0046	0.0022	0.037	692478
rs1468797	7:33169660	BBS9	T/C	0.8199	-0.0046	0.0022	0.037	691826
rs1569239	7:33170104	BBS9	A/C	0.1813	0.0046	0.0022	0.037	691855
rs17150810	7:33243688	BBS9	T/C	0.1811	0.0046	0.0022	0.037	690719
rs3828996	7:33195526	BBS9	T/C	0.91166	0.0064	0.0031	0.037	692016
rs6955645	7:33391139	BBS9	A/T	0.08472	-0.0065	0.0031	0.037	691883
rs6108529	20:10374093	MKKS	T/C	0.889	0.0057	0.0027	0.037	691564
rs1662699	9:87411744	NTRK2	A/T	0.7969	0.0045	0.0021	0.037	689257
rs4758281	11:8091548	TUB	A/C	0.3805	0.0037	0.0018	0.037	687237
rs17027651	2:63391340	WDPCP	A/G	0.8789	0.0056	0.0027	0.037	688508
rs10278228	7:33248678	BBS9	T/G	0.8163	-0.0046	0.0022	0.038	689904
rs12671396	7:33172890	BBS9	T/C	0.1802	0.0046	0.0022	0.038	692029
rs1548879	7:33170847	BBS9	T/C	0.8187	-0.0046	0.0022	0.038	691873
rs17169913	7:33195816	BBS9	T/C	0.8191	-0.0045	0.0022	0.038	692457
rs4720104	7:33184558	BBS9	A/G	0.1816	0.0045	0.0022	0.038	692270
rs4723258	7:33186926	BBS9	A/C	0.1816	0.0045	0.0022	0.038	692323
rs4723259	7:33187193	BBS9	A/G	0.1816	0.0046	0.0022	0.038	692300
rs6961060	7:33496359	BBS9	A/C	0.08524	-0.0065	0.0032	0.038	686704
rs11137148	9:140497212	EHMT1	A/C	0.1324	0.0058	0.0028	0.038	664005
rs999244	9:87270782	NTRK2	T/C	0.1739	-0.0047	0.0023	0.038	690065
rs8075153	17:17622666	RAI1	T/C	0.4283	0.0034	0.0016	0.038	793320
rs2997488	1:243613000	SDCCAG8	A/G	0.05987	0.0085	0.0041	0.038	667812
rs3734355	6:100868721	SIM1	A/G	0.1348	0.0052	0.0025	0.038	692434
rs6468696	8:100869358	VPS13B	A/C	0.8258	-0.0047	0.0023	0.038	691810
rs10227739	7:33172150	BBS9	A/G	0.8198	-0.0045	0.0022	0.039	691974
rs17169835	7:33186353	BBS9	C/G	0.1816	0.0045	0.0022	0.039	692310
rs4720105	7:33185011	BBS9	T/C	0.8184	-0.0045	0.0022	0.039	692270
rs4720106	7:33187279	BBS9	A/C	0.8184	-0.0045	0.0022	0.039	692128
rs4720107	7:33187357	BBS9	A/T	0.8184	-0.0045	0.0022	0.039	692161
rs886528	16:3811556	CREBBP	A/G	0.5505	0.0034	0.0017	0.039	794326
rs2191032	3:45906572	LZTFL1	T/C	0.7855	0.0043	0.0021	0.039	692492
rs1753990	6:84729122	MRAP2	T/G	0.2587	-0.0041	0.002	0.039	690989
rs11793903	9:87263753	NTRK2	A/G	0.05893	-0.0079	0.0038	0.039	675635
rs3780631	9:87352714	NTRK2	T/G	0.95598	0.0086	0.0042	0.039	691209
rs10754803	1:243513047	SDCCAG8	A/G	0.4771	0.0036	0.0017	0.039	673632
rs2242501	11:8118103	TUB	A/G	0.2621	0.0041	0.002	0.039	691557
rs7481121	11:8120902	TUB	A/G	0.08577	-0.0068	0.0033	0.039	676999
rs10231297	7:33385529	BBS9	A/G	0.03198	-0.0106	0.0052	0.04	646849
rs10272253	7:33171720	BBS9	T/G	0.8186	-0.0045	0.0022	0.04	691963
rs13236414	7:33196434	BBS9	T/G	0.8185	-0.0045	0.0022	0.04	692252
rs17169847	7:33188549	BBS9	A/G	0.1816	0.0045	0.0022	0.04	692198
rs4723255	7:33184783	BBS9	T/C	0.8184	-0.0045	0.0022	0.04	692244
rs4723256	7:33185035	BBS9	A/G	0.8184	-0.0045	0.0022	0.04	692246
rs12232308	15:93409054	CHD2	A/G	0.5923	0.0037	0.0018	0.04	691130
rs6026584	20:57469073	GNAS	T/C	0.3389	0.0038	0.0018	0.04	686494
rs9856760	3:45906356	LZTFL1	A/G	0.7842	0.0042	0.0021	0.04	692216
rs593300	6:84723635	MRAP2	T/C	0.2595	-0.0041	0.002	0.04	689917
rs604527	6:84723489	MRAP2	T/C	0.2586	-0.0041	0.002	0.04	689779
rs6053314	20:5309726	PROKR2	T/C	0.96802	-0.0096	0.0047	0.04	686114
rs9386144	6:100873257	SIM1	T/C	0.7993	-0.0044	0.0021	0.04	688698
rs2178152	11:8056799	TUB	A/G	0.75	0.0041	0.002	0.04	690416
rs7840626	8:100879826	VPS13B	A/T	0.8262	-0.0047	0.0023	0.04	691336
rs17624246	5:132284204	AFF4	A/C	0.1988	-0.0044	0.0022	0.041	691993
rs10269937	7:33196259	BBS9	T/C	0.8185	-0.0045	0.0022	0.041	692003
rs11763306	7:33191801	BBS9	A/G	0.1816	0.0045	0.0022	0.041	692230
rs11769811	7:33196848	BBS9	A/G	0.8185	-0.0045	0.0022	0.041	692476
rs4723260	7:33187215	BBS9	T/G	0.1817	0.0045	0.0022	0.041	692272
rs764127	7:33188933	BBS9	C/G	0.1816	0.0045	0.0022	0.041	692197
rs7814035	8:96301273	C8orf37	T/C	0.06881	-0.007	0.0034	0.041	692570
rs7350766	15:93552965	CHD2	A/T	0.91505	0.0063	0.0031	0.041	675030
rs2057291	20:57472043	GNAS	A/G	0.3391	0.0037	0.0018	0.041	688481
rs16991555	20:10402591	MKKS	T/C	0.9468	0.0078	0.0038	0.041	691938
rs2103974	20:5310998	PROKR2	T/G	0.1612	0.005	0.0024	0.041	689698
rs7114018	11:8089946	TUB	T/C	0.4322	0.0036	0.0018	0.041	675603
rs7952059	11:8055832	TUB	T/C	0.2053	-0.0044	0.0021	0.041	689447
rs1130474	8:100904277	VPS13B	T/C	0.8155	-0.0046	0.0022	0.041	690299
rs12918376	16:56558181	BBS2	T/G	0.3723	-0.0036	0.0018	0.042	689651
rs10232564	7:33190591	BBS9	C/G	0.8184	-0.0044	0.0022	0.042	692205
rs10270961	7:33193141	BBS9	A/G	0.8184	-0.0044	0.0022	0.042	692247
rs13240884	7:33193971	BBS9	T/C	0.1808	0.0045	0.0022	0.042	692262
rs17169881	7:33192502	BBS9	A/G	0.8184	-0.0044	0.0022	0.042	692243
rs9791555	7:33245128	BBS9	A/G	0.9133	0.0063	0.0031	0.042	691566
rs7170382	15:93415051	CHD2	C/G	0.6373	-0.0037	0.0018	0.042	676460
rs9611502	22:41531236	EP300	T/C	0.03929	-0.0094	0.0046	0.042	675715
rs12001219	9:87588280	NTRK2	T/C	0.09887	-0.0057	0.0028	0.042	690930
rs12211611	6:57065443	RAB23	C/G	0.1964	0.0045	0.0022	0.042	689226
rs12548344	8:100880904	VPS13B	A/G	0.1739	0.0046	0.0023	0.042	691098
rs17408988	2:63418575	WDPCP	C/G	0.4281	0.0035	0.0017	0.042	689503
rs11766506	7:33196564	BBS9	T/G	0.8185	-0.0044	0.0022	0.043	692467
rs1362367	7:33197361	BBS9	T/C	0.8185	-0.0044	0.0022	0.043	692315
rs7804742	7:33177605	BBS9	A/G	0.819	-0.0044	0.0022	0.043	691903
rs8142276	22:41471447	EP300	T/C	0.627	-0.0036	0.0018	0.043	690779
rs9611500	22:41522359	EP300	C/G	0.96276	0.0096	0.0047	0.043	673328
rs1047896	9:87425973	NTRK2	A/G	0.7918	0.0043	0.0021	0.043	688305
rs6085100	20:5305367	PROKR2	A/G	0.03169	0.0095	0.0047	0.043	684302
rs11685079	2:63374600	WDPCP	T/C	0.111	-0.0056	0.0028	0.043	689889
rs10787289	10:112657207	BBIP1	A/G	0.2563	-0.0041	0.002	0.044	636185
rs10241188	7:33192591	BBS9	T/G	0.1816	0.0044	0.0022	0.044	692245
rs17170255	7:33497548	BBS9	A/G	0.09419	-0.0062	0.0031	0.044	689821
rs9791901	7:33240972	BBS9	T/C	0.91318	0.0062	0.0031	0.044	691721
rs4876904	9:140735138	EHMT1	T/G	0.5522	-0.0036	0.0018	0.044	686917
rs7290458	22:41476337	EP300	T/C	0.6269	-0.0036	0.0018	0.044	692638
rs919197	20:57480933	GNAS	T/C	0.4839	-0.0035	0.0017	0.044	691652
rs2699396	2:63488790	WDPCP	T/C	0.4153	0.0033	0.0016	0.044	792215
rs13008860	2:73774019	ALMS1	A/G	0.4085	0.0035	0.0018	0.045	684902
rs10518289	4:122806447	BBS7	C/G	0.6391	0.0036	0.0018	0.045	686751
rs1406606	7:33192166	BBS9	T/C	0.8184	-0.0044	0.0022	0.045	692032
rs17169855	7:33189793	BBS9	A/T	0.8184	-0.0044	0.0022	0.045	692164
rs17170099	7:33235552	BBS9	A/G	0.91318	0.0062	0.0031	0.045	691600
rs8141730	22:41473061	EP300	A/G	0.6258	-0.0036	0.0018	0.045	690723
rs1949411	2:63571808	WDPCP	T/C	0.1694	-0.0044	0.0022	0.045	793948
rs10224956	7:33196354	BBS9	A/G	0.8183	-0.0044	0.0022	0.046	692466
rs17170105	7:33236176	BBS9	A/C	0.9133	0.0061	0.0031	0.046	691597
rs11137281	9:140760661	EHMT1	T/C	0.1877	-0.0045	0.0023	0.046	664468
rs10105686	8:38306927	FGFR1	C/G	0.7908	0.0043	0.0022	0.046	679574
rs1565449	9:87650969	NTRK2	A/G	0.02356	-0.0124	0.0062	0.046	658570
rs11195232	10:112375282	SMC3	A/G	0.2706	0.0042	0.0021	0.046	650595
rs1950008	11:8058910	TUB	A/G	0.05771	-0.0076	0.0038	0.046	676720
rs11689644	2:63709708	WDPCP	T/G	0.90961	0.0059	0.0029	0.046	692236
rs2034270	2:63692447	WDPCP	T/G	0.2336	0.0042	0.0021	0.046	670659
rs7598660	2:73740425	ALMS1	A/G	0.4093	0.0035	0.0018	0.047	685320
rs10486523	7:33241996	BBS9	T/C	0.08688	-0.0061	0.0031	0.047	691712
rs17170104	7:33236046	BBS9	T/G	0.08676	-0.0061	0.0031	0.047	691602
rs7805883	7:33479100	BBS9	C/G	0.90172	0.006	0.003	0.047	688284
rs4492337	8:96266941	C8orf37	A/G	0.5071	0.0034	0.0017	0.047	687568
rs6995368	8:96299366	C8orf37	T/C	0.93148	0.0065	0.0033	0.047	680122
rs4526432	9:140734161	EHMT1	T/C	0.5541	-0.0034	0.0017	0.047	691921
rs4129472	5:42523172	GHR	T/C	0.8033	0.0043	0.0022	0.047	671467
rs6414898	5:42696168	GHR	C/G	0.2389	-0.004	0.002	0.047	690397
rs6873340	5:42711100	GHR	A/G	0.7609	0.004	0.002	0.047	690809
rs7864264	9:87639472	NTRK2	T/C	0.4268	-0.0034	0.0017	0.047	690023
rs12195875	6:57063946	RAB23	A/G	0.8127	-0.0042	0.0021	0.047	795098
rs4720103	7:33166070	BBS9	A/G	0.8176	-0.0044	0.0022	0.048	691157
rs6973757	7:33178189	BBS9	C/G	0.181	0.0043	0.0022	0.048	686138
rs986554	7:33242760	BBS9	A/G	0.1877	0.0043	0.0022	0.048	684802
rs7614342	3:45940817	LZTFL1	A/T	0.8417	-0.0043	0.0022	0.048	788280
rs4877900	9:87632318	NTRK2	T/C	0.573	0.0034	0.0017	0.048	689682
rs6076810	20:5305638	PROKR2	A/G	0.96825	-0.0093	0.0047	0.048	674757
rs3778033	6:100875516	SIM1	T/C	0.7978	-0.0042	0.0021	0.048	692597
rs10519485	15:25602101	UBE3A	A/C	0.98877	0.0151	0.0076	0.048	521585
rs7713754	5:132295316	AFF4	T/C	0.98088	0.0122	0.0062	0.049	593798
rs952833	12:76733594	BBS10	T/C	0.4588	-0.0034	0.0017	0.049	684792
rs10867056	9:140624798	EHMT1	T/G	0.7083	-0.0038	0.0019	0.049	687216
rs10941583	5:42691728	GHR	A/G	0.2506	-0.0039	0.002	0.049	689498
rs6451642	5:42741622	GHR	A/G	0.7643	0.0039	0.002	0.049	691923
rs11140793	9:87491480	NTRK2	A/C	0.84	-0.0047	0.0024	0.049	636826
rs12045585	1:243673099	SDCCAG8	A/G	0.132	-0.0053	0.0027	0.049	672227
rs953492	1:243471192	SDCCAG8	A/G	0.4786	-0.0034	0.0017	0.049	689315
rs6887411	5:132252106	AFF4	A/T	0.7954	0.0042	0.0021	0.05	683556
rs10486526	7:33335392	BBS9	T/C	0.03192	-0.0106	0.0054	0.05	638041
rs17170219	7:33452220	BBS9	T/C	0.08413	-0.0061	0.0031	0.05	691517
rs7444761	5:42710504	GHR	A/C	0.2393	-0.0039	0.002	0.05	690736
rs4707031	6:84736254	MRAP2	A/G	0.7382	0.0039	0.002	0.05	689889
rs4615661	9:87594400	NTRK2	C/G	0.8464	0.0051	0.0026	0.05	529002
rs7026417	9:87589165	NTRK2	T/C	0.90061	0.0055	0.0028	0.05	692304
rs6085103	20:5309390	PROKR2	A/G	0.96802	-0.0092	0.0047	0.05	677958
rs6662991	1:243410208	SDCCAG8	A/G	0.6375	-0.0035	0.0018	0.05	691057
rs12546882	8:100882147	VPS13B	A/C	0.8259	-0.0045	0.0023	0.05	691175
rs11683229	2:63596836	WDPCP	A/G	0.8859	0.0053	0.0027	0.05	691685
rs10867057	9:140625073	EHMT1	T/G	0.2911	0.0037	0.0019	0.051	687263
rs11137190	9:140624610	EHMT1	C/G	0.7089	-0.0037	0.0019	0.051	687248
rs6559218	9:140629498	EHMT1	A/G	0.3533	0.0036	0.0018	0.051	686525
rs2742362	3:45875149	LZTFL1	T/G	0.2125	-0.0041	0.0021	0.051	689867
rs3790155	20:10409054	MKKS	T/C	0.1011	-0.0056	0.0028	0.051	692213
rs17087586	9:87360720	NTRK2	T/G	0.04508	-0.0082	0.0042	0.051	691600
rs6053310	20:5302632	PROKR2	C/G	0.96492	-0.0093	0.0047	0.051	671713
rs11771086	7:33368513	BBS9	A/G	0.7999	-0.0042	0.0021	0.052	688028
rs17170175	7:33346445	BBS9	A/G	0.1832	0.0043	0.0022	0.052	690649
rs3787493	20:57481148	GNAS	A/G	0.4835	-0.0034	0.0017	0.052	692603
rs1130569	8:100899793	VPS13B	A/G	0.1833	0.0043	0.0022	0.052	690965
rs7009713	8:100881854	VPS13B	C/G	0.1739	0.0044	0.0023	0.052	690770
rs4852939	2:73856769	ALMS1	C/G	0.3582	0.0034	0.0018	0.053	690832
rs10951380	7:33251119	BBS9	A/C	0.1824	0.0043	0.0022	0.053	690868
rs12701289	7:33275054	BBS9	T/C	0.8162	-0.0043	0.0022	0.053	691466
rs4723262	7:33194707	BBS9	A/G	0.1815	0.0043	0.0022	0.053	686400
rs7779777	7:33480737	BBS9	A/G	0.08524	-0.006	0.0031	0.053	690138
rs6451641	5:42717529	GHR	A/G	0.7581	0.0039	0.002	0.053	691786
rs2480201	6:84805699	MRAP2	T/C	0.05583	0.0076	0.0039	0.053	687587
rs17087700	9:87404873	NTRK2	A/T	0.04426	-0.0081	0.0042	0.053	691288
rs4758287	11:8099913	TUB	A/C	0.2882	0.0038	0.0019	0.053	679358
rs7072811	10:112666952	BBIP1	A/G	0.04946	-0.0074	0.0039	0.054	677000
rs10951381	7:33251175	BBS9	A/C	0.8176	-0.0042	0.0022	0.054	690832
rs3884597	7:33385262	BBS9	T/G	0.4664	0.0033	0.0017	0.054	689935
rs7790483	7:33406616	BBS9	T/C	0.8983	0.0054	0.0028	0.054	691916
rs6180	5:42719239	GHR	A/C	0.5513	0.0033	0.0017	0.054	689616
rs10115908	9:87623385	NTRK2	A/G	0.4338	-0.0033	0.0017	0.054	688067
rs1135382	8:100891630	VPS13B	A/G	0.1841	0.0043	0.0022	0.054	691149
rs4510829	8:100891210	VPS13B	A/G	0.1836	0.0043	0.0022	0.054	691183
rs6726257	2:64042093	WDPCP	A/G	0.5765	0.0033	0.0017	0.054	687995
rs10496190	2:73638823	ALMS1	C/G	0.5904	-0.0034	0.0018	0.055	679410
rs309341	4:123642387	BBS12	A/C	0.68	-0.0036	0.0019	0.055	691566
rs11976613	7:33352950	BBS9	A/C	0.8003	-0.0042	0.0022	0.055	685983
rs12673026	7:33171972	BBS9	T/G	0.8186	-0.0042	0.0022	0.055	686094
rs7389498	9:140738231	EHMT1	A/G	0.4179	0.0034	0.0018	0.055	680687
rs6895971	5:42728831	GHR	T/C	0.2409	-0.0038	0.002	0.055	691912
rs12744216	1:243403293	SDCCAG8	A/G	0.3625	0.0035	0.0018	0.055	692200
rs10261756	7:33190448	BBS9	A/C	0.819	-0.0042	0.0022	0.056	686319
rs2700684	7:33631884	BBS9	A/G	0.92551	-0.0065	0.0034	0.056	690922
rs4979643	9:140638607	EHMT1	A/T	0.7084	-0.0036	0.0019	0.056	687697
rs4733930	8:38311001	FGFR1	T/C	0.4242	0.0036	0.0019	0.056	612085
rs2973018	5:42723790	GHR	T/C	0.4488	-0.0033	0.0017	0.056	692501
rs495461	6:84724176	MRAP2	A/G	0.2575	-0.0038	0.002	0.056	678591
rs10868244	9:87595263	NTRK2	T/C	0.90137	0.0054	0.0028	0.056	690740
rs3904685	1:243414712	SDCCAG8	A/G	0.6376	-0.0034	0.0018	0.056	685519
rs7828241	8:100892645	VPS13B	A/C	0.8148	-0.0043	0.0022	0.056	691186
rs433164	4:123637201	BBS12	C/G	0.6801	-0.0035	0.0018	0.057	692371
rs2973015	5:42717992	GHR	A/G	0.5512	0.0033	0.0017	0.057	692513
rs4812042	20:57461915	GNAS	A/G	0.6312	-0.0035	0.0018	0.057	678766
rs3758317	9:87282615	NTRK2	T/C	0.1735	-0.0043	0.0023	0.057	690645
rs4434590	8:100860657	VPS13B	T/C	0.188	0.0042	0.0022	0.057	688664
rs4626565	8:100890542	VPS13B	T/C	0.8169	-0.0042	0.0022	0.057	691137
rs17348221	2:63467915	WDPCP	A/C	0.98416	0.0165	0.0087	0.057	653888
rs4784670	16:56498511	BBS2	T/G	0.6076	0.0036	0.0019	0.058	541117
rs12666753	7:33272555	BBS9	A/G	0.8164	-0.0042	0.0022	0.058	690972
rs17170174	7:33337421	BBS9	A/T	0.8179	-0.0042	0.0022	0.058	691950
rs11137282	9:140760810	EHMT1	C/G	0.8138	0.0044	0.0023	0.058	661792
rs1345824	5:42724062	GHR	T/G	0.4488	-0.0033	0.0017	0.058	692536
rs2973023	5:42732883	GHR	C/G	0.5506	0.0033	0.0017	0.058	692467
rs292182	5:36954812	NIPBL	A/G	0.438	-0.0031	0.0016	0.058	794111
rs10125141	9:87622810	NTRK2	T/C	0.4338	-0.0033	0.0017	0.058	688298
rs9802671	9:87597827	NTRK2	A/C	0.09904	-0.0054	0.0029	0.058	684348
rs12097743	1:243411386	SDCCAG8	C/G	0.3623	0.0034	0.0018	0.058	691397
rs11696083	2:63347964	WDPCP	T/G	0.8815	0.0052	0.0027	0.058	688264
rs12466601	2:63556348	WDPCP	T/G	0.7976	0.004	0.0021	0.058	688393
rs12478442	2:63556365	WDPCP	T/C	0.2036	-0.004	0.0021	0.058	688434
rs2421822	2:63437482	WDPCP	A/G	0.5912	-0.0033	0.0017	0.058	688443
rs13227256	7:33536947	BBS9	A/G	0.8114	-0.0043	0.0023	0.059	661330
rs3779239	7:33430271	BBS9	A/G	0.5344	-0.0033	0.0017	0.059	688265
rs6462474	7:33430817	BBS9	A/G	0.1016	-0.0053	0.0028	0.059	691785
rs7810388	7:33304107	BBS9	A/G	0.8179	-0.0041	0.0022	0.059	692015
rs9784973	7:33389689	BBS9	A/G	0.5337	-0.0033	0.0017	0.059	690298
rs2239317	16:3920740	CREBBP	C/G	0.8967	0.0055	0.0029	0.059	680664
rs9619950	22:41565051	EP300	T/C	0.04671	0.0079	0.0042	0.059	649522
rs2910875	5:42719826	GHR	A/G	0.4491	-0.0032	0.0017	0.059	692569
rs12548840	8:100897808	VPS13B	T/C	0.1832	0.0042	0.0022	0.059	691154
rs11680079	2:63419028	WDPCP	A/T	0.8853	0.0051	0.0027	0.059	689534
rs380738	4:123639000	BBS12	T/C	0.3203	0.0035	0.0018	0.06	692549
rs17170204	7:33400857	BBS9	T/C	0.8978	0.0053	0.0028	0.06	691947
rs9638888	7:33290134	BBS9	A/G	0.1822	0.0041	0.0022	0.06	691918
rs9638889	7:33322438	BBS9	T/C	0.8178	-0.0041	0.0022	0.06	691888
rs3739570	9:87637578	NTRK2	A/G	0.08518	-0.0056	0.003	0.06	690261
rs4877293	9:87567543	NTRK2	T/G	0.92054	-0.006	0.0032	0.06	690980
rs17170142	7:33296207	BBS9	A/G	0.8178	-0.0041	0.0022	0.061	692020
rs130024	16:3834316	CREBBP	T/C	0.92861	-0.0068	0.0036	0.061	660372
rs719756	5:42725629	GHR	A/T	0.4491	-0.0032	0.0017	0.061	692293
rs2783964	1:243500664	SDCCAG8	A/T	0.4625	-0.0032	0.0017	0.061	690461
rs2783971	1:243474536	SDCCAG8	A/C	0.4791	-0.0032	0.0017	0.061	688937
rs708458	5:132208686	AFF4	A/G	0.09583	0.0055	0.0029	0.062	692567
rs4707030	6:84736187	MRAP2	A/C	0.2592	-0.0037	0.002	0.062	678324
rs12238811	9:87372352	NTRK2	T/C	0.04408	-0.0078	0.0042	0.062	691994
rs11978733	7:33372679	BBS9	C/G	0.7993	-0.004	0.0021	0.063	688196
rs2910869	5:42741846	GHR	T/C	0.4495	-0.0032	0.0017	0.063	692367
rs300065	5:36997827	NIPBL	C/G	0.4424	-0.0032	0.0017	0.063	691007
rs13236865	7:33301483	BBS9	T/C	0.8179	-0.0041	0.0022	0.064	691958
rs6952877	7:33284738	BBS9	T/G	0.8171	-0.0041	0.0022	0.064	691862
rs7777101	7:33262389	BBS9	T/C	0.1841	0.0041	0.0022	0.064	688751
rs7783612	7:33308855	BBS9	C/G	0.8179	-0.0041	0.0022	0.064	691862
rs10780184	9:140597257	EHMT1	C/G	0.2652	0.0036	0.002	0.064	688259
rs1129767	9:140638416	EHMT1	A/G	0.1889	0.0042	0.0023	0.064	688096
rs9359580	6:84736338	MRAP2	A/G	0.2608	-0.0037	0.002	0.064	677981
rs10868223	9:87265126	NTRK2	T/C	0.1141	-0.0051	0.0027	0.064	690788
rs886452	5:132207860	AFF4	A/G	0.09466	0.0054	0.0029	0.065	692503
rs13224392	7:33325040	BBS9	A/G	0.8178	-0.0041	0.0022	0.065	691800
rs6953348	7:33294234	BBS9	A/G	0.8178	-0.0041	0.0022	0.065	691371
rs1881233	11:8063169	TUB	T/C	0.1589	-0.0044	0.0024	0.065	682875
rs6578920	11:8060124	TUB	T/C	0.06092	-0.0067	0.0036	0.065	665940
rs10865344	2:64058588	WDPCP	A/T	0.4258	-0.0032	0.0017	0.065	687930
rs11899838	2:63478136	WDPCP	T/C	0.1268	0.0049	0.0026	0.065	690456
rs3812497	9:140611436	EHMT1	T/C	0.724	-0.0036	0.002	0.066	689486
rs8047140	16:29922988	KCTD13	T/C	0.1152	-0.0052	0.0028	0.066	620771
rs7157	8:100889677	VPS13B	T/C	0.1822	0.0041	0.0022	0.066	691035
rs10486537	7:33596515	BBS9	A/G	0.8956	-0.0053	0.0029	0.067	692605
rs158796	5:36878780	NIPBL	A/G	0.5549	0.0032	0.0017	0.067	692606
rs2291506	9:87639848	NTRK2	A/G	0.4321	-0.0032	0.0017	0.067	690190
rs1918849	11:8063419	TUB	A/G	0.8399	0.0044	0.0024	0.067	686938
rs370617	4:123640865	BBS12	T/C	0.6797	-0.0034	0.0018	0.068	692580
rs4642376	5:42432739	GHR	T/G	0.1926	0.0038	0.0021	0.068	780661
rs159751	5:36999998	NIPBL	A/G	0.5578	0.0032	0.0017	0.068	691086
rs301859	5:37045841	NIPBL	A/G	0.5559	0.003	0.0016	0.068	793564
rs4852940	2:73857002	ALMS1	A/G	0.137	0.0046	0.0025	0.069	690224
[truncated: 2,994 more rows]

## Sheet: 5D
Supplementary Table 5D. Summary statistics of all selected tagSNPs using a ±20kb gene definition. Significant associations (P<4.01×10-5) are highlighted in grey.
SNP	Chr:position	n Tagged SNPs	Gene	Alleles	EAF	β	SE	P	N
rs6265	11:27679916	6	BDNF	T/C	0.1951	-0.0412	0.0021	1e-86	795458
rs7103411	11:27700125	11	BDNF	T/C	0.7841	0.0385	0.002	1.6e-82	795623
rs925946	11:27667202	10	BDNF	T/G	0.3088	0.029	0.0018	2.2e-61	795513
rs4788099	16:28855727	20	SH2B1	A/G	0.5963	-0.0269	0.0017	4.8e-59	795572
rs7359397	16:28885659	19	SH2B1	T/C	0.4021	0.0267	0.0017	4.9e-58	795625
rs10835211	11:27701365	3	BDNF	A/G	0.261	0.0289	0.0019	2e-54	795539
rs12288512	11:27747671	2	BDNF	A/G	0.2028	0.0281	0.002	8.6e-44	794179
[truncated: 1,239 more rows]

## Sheet: 5E
Supplementary Table 5E. All gene-based analyses using VEGAS2 with a ±20kb gene definition. Significant associations (P<9.26×10-4) are highlighted in grey.
[truncated: 55 more rows]

[truncated: 6 more sheets: 5F, 5G, 5H, 5I, 5J, 5K]
