# Supplementary material for: A Candidate-Gene Approach Identifies Novel Associations Between Common Variants in/Near Syndromic Obesity Genes and BMI in Pediatric and Adult European Populations
Source: Oxford University Press journal article supplement (doi:10.2337/db18-0986), 2019-01-28
Supplement: db180986supplementarydata7.xlsx [file db180986supplementarydata7.xlsx]

## Sheet: untitled 3
Supplementary Table 6. VEP analysis of fine-mapping SNPs: top SNPs from single-marker, tagSNP, and gene-based analysis as well as SNPs in moderate LD (r2>0.5).
SNP	Consequence	Location	Alleles	EAF	β	SE	P	N	Gene
rs6265	3_prime_UTR_variant,NMD_transcript_variant	11:27658369-27658369	T/C	0.1951	-0.0412	0.0021	1e-86	795458	BDNF
rs6265	intron_variant,non_coding_transcript_variant	11:27658369-27658369	T/C	0.1951	-0.0412	0.0021	1e-86	795458	BDNF
rs6265	missense_variant	11:27658369-27658369	T/C	0.1951	-0.0412	0.0021	1e-86	795458	BDNF
rs6265	non_coding_transcript_exon_variant	11:27658369-27658369	T/C	0.1951	-0.0412	0.0021	1e-86	795458	BDNF
rs2049045	intron_variant	11:27672694-27672694	C/G	0.1842	-0.0405	0.0021	1.9e-83	793584	BDNF
rs2049045	intron_variant,NMD_transcript_variant	11:27672694-27672694	C/G	0.1842	-0.0405	0.0021	1.9e-83	793584	BDNF
rs2049045	intron_variant,non_coding_transcript_variant	11:27672694-27672694	C/G	0.1842	-0.0405	0.0021	1.9e-83	793584	BDNF
rs11030104	intron_variant	11:27662970-27662970	A/G	0.7891	0.0393	0.002	2e-83	794765	BDNF
rs11030104	intron_variant,NMD_transcript_variant	11:27662970-27662970	A/G	0.7891	0.0393	0.002	2e-83	794765	BDNF
rs11030104	intron_variant,non_coding_transcript_variant	11:27662970-27662970	A/G	0.7891	0.0393	0.002	2e-83	794765	BDNF
rs16917237	intron_variant	11:27680836-27680836	T/G	0.2105	-0.0393	0.002	2.7e-83	787789	BDNF
rs16917237	intron_variant,NMD_transcript_variant	11:27680836-27680836	T/G	0.2105	-0.0393	0.002	2.7e-83	787789	BDNF
rs16917237	intron_variant,non_coding_transcript_variant	11:27680836-27680836	T/G	0.2105	-0.0393	0.002	2.7e-83	787789	BDNF
rs7103411	intron_variant	11:27678578-27678578	T/C	0.7841	0.0385	0.002	1.6e-82	795623	BDNF
rs7103411	intron_variant,NMD_transcript_variant	11:27678578-27678578	T/C	0.7841	0.0385	0.002	1.6e-82	795623	BDNF
rs7103411	intron_variant,non_coding_transcript_variant	11:27678578-27678578	T/C	0.7841	0.0385	0.002	1.6e-82	795623	BDNF
rs7103411	regulatory_region_variant	11:27678578-27678578	T/C	0.7841	0.0385	0.002	1.6e-82	795623	BDNF
rs2030323	intron_variant	11:27706992-27706992	A/C	0.2149	-0.0383	0.002	8.4e-82	795269	BDNF
rs2030323	intron_variant,non_coding_transcript_variant	11:27706992-27706992	A/C	0.2149	-0.0383	0.002	8.4e-82	795269	BDNF
rs10501087	intron_variant,non_coding_transcript_variant	11:27648561-27648561	T/C	0.791	0.0384	0.002	2.9e-79	795220	BDNF
rs925947	intron_variant,non_coding_transcript_variant	11:27645820-27645820	T/G	0.209	-0.0385	0.0021	1.1e-78	774560	BDNF
rs4074134	intron_variant,non_coding_transcript_variant	11:27625738-27625738	T/C	0.2089	-0.0377	0.002	5.8e-78	795578	BDNF
rs4923457	intron_variant,non_coding_transcript_variant	11:27627033-27627033	A/T	0.7913	0.0377	0.002	7.4e-78	795171	BDNF
rs4923460	intron_variant,non_coding_transcript_variant	11:27635242-27635242	T/G	0.2088	-0.0376	0.002	1.9e-77	794867	BDNF
rs4923461	intron_variant,non_coding_transcript_variant	11:27635363-27635363	A/G	0.7912	0.0376	0.002	3.4e-77	795259	BDNF
rs10767664	intron_variant	11:27704439-27704439	A/T	0.785	0.0385	0.0021	5.5e-77	731192	BDNF
rs10767664	intron_variant,non_coding_transcript_variant	11:27704439-27704439	A/T	0.785	0.0385	0.0021	5.5e-77	731192	BDNF
rs988748	intron_variant	11:27703198-27703198	C/G	0.2187	-0.0379	0.0021	1.6e-75	739603	BDNF
rs988748	intron_variant,non_coding_transcript_variant	11:27703198-27703198	C/G	0.2187	-0.0379	0.0021	1.6e-75	739603	BDNF
rs1488830	intron_variant,non_coding_transcript_variant	11:27615338-27615338	T/C	0.7899	0.0373	0.002	5.5e-75	790842	BDNF
rs879048	intron_variant,non_coding_transcript_variant	11:27617387-27617387	A/C	0.79	0.0369	0.002	8e-75	795201	BDNF
rs6484320	intron_variant	11:27681641-27681641	A/T	0.7849	0.0382	0.0021	2e-72	692257	BDNF
rs6484320	intron_variant,NMD_transcript_variant	11:27681641-27681641	A/T	0.7849	0.0382	0.0021	2e-72	692257	BDNF
rs6484320	intron_variant,non_coding_transcript_variant	11:27681641-27681641	A/T	0.7849	0.0382	0.0021	2e-72	692257	BDNF
rs11030084	intron_variant,non_coding_transcript_variant	11:27622178-27622178	T/C	0.192	-0.0392	0.0022	4.8e-70	692253	BDNF
rs12419948	intron_variant,non_coding_transcript_variant	11:27645437-27645437	A/T	0.209	-0.038	0.0022	1.1e-69	692275	BDNF
rs7498665	intron_variant,non_coding_transcript_variant	16:28871920-28871920	A/G	0.5962	-0.0271	0.0017	5.6e-60	790299	SH2B1
rs7498665	missense_variant	16:28871920-28871920	A/G	0.5962	-0.0271	0.0017	5.6e-60	790299	SH2B1
rs7498665	non_coding_transcript_exon_variant	16:28871920-28871920	A/G	0.5962	-0.0271	0.0017	5.6e-60	790299	SH2B1
rs3888190	intergenic_variant	16:28878165-28878165	A/C	0.4038	0.0271	0.0017	9.2e-60	794486	SH2B1
rs4788101	intron_variant	16:28856483-28856483	T/C	0.4038	0.027	0.0017	1.4e-59	795541	SH2B1
rs8055982	intron_variant	16:28869881-28869881	A/C	0.5962	-0.027	0.0017	1.6e-59	795565	SH2B1
rs8055982	intron_variant,non_coding_transcript_variant	16:28869881-28869881	A/C	0.5962	-0.027	0.0017	1.6e-59	795565	SH2B1
rs4788102	intron_variant	16:28862077-28862077	A/G	0.4039	0.027	0.0017	2.7e-59	795549	SH2B1
rs4788099	intron_variant	16:28844406-28844406	A/G	0.5963	-0.0269	0.0017	4.8e-59	795572	SH2B1
rs4788099	intron_variant,NMD_transcript_variant	16:28844406-28844406	A/G	0.5963	-0.0269	0.0017	4.8e-59	795572	SH2B1
rs7187776	5_prime_UTR_variant	16:28846324-28846324	A/G	0.5927	-0.0265	0.0016	1.4e-58	792563	SH2B1
rs7187776	5_prime_UTR_variant,NMD_transcript_variant	16:28846324-28846324	A/G	0.5927	-0.0265	0.0016	1.4e-58	792563	SH2B1
rs7187776	regulatory_region_variant	16:28846324-28846324	A/G	0.5927	-0.0265	0.0016	1.4e-58	792563	SH2B1
rs8049439	intron_variant	16:28826194-28826194	T/C	0.592	-0.0265	0.0016	1.5e-58	795590	SH2B1
rs8049439	intron_variant,NMD_transcript_variant	16:28826194-28826194	T/C	0.592	-0.0265	0.0016	1.5e-58	795590	SH2B1
rs8049439	intron_variant,non_coding_transcript_variant	16:28826194-28826194	T/C	0.592	-0.0265	0.0016	1.5e-58	795590	SH2B1
rs8061590	intron_variant	16:28883809-28883809	A/G	0.5969	-0.0268	0.0017	1.8e-58	793970	SH2B1
rs7359397	intergenic_variant	16:28874338-28874338	T/C	0.4021	0.0267	0.0017	4.9e-58	795625	SH2B1
rs2008514	intron_variant,non_coding_transcript_variant	16:28814284-28814284	A/G	0.407	0.0268	0.0017	9.1e-58	787726	SH2B1
rs2008514	non_coding_transcript_exon_variant	16:28814284-28814284	A/G	0.407	0.0268	0.0017	9.1e-58	787726	SH2B1
rs12325113	intergenic_variant	16:28837347-28837347	T/C	0.5975	-0.0265	0.0017	1.7e-57	795568	SH2B1
rs12443881	intron_variant	16:28830456-28830456	T/C	0.4023	0.0265	0.0017	1.9e-57	795596	SH2B1
rs12443881	intron_variant,NMD_transcript_variant	16:28830456-28830456	T/C	0.4023	0.0265	0.0017	1.9e-57	795596	SH2B1
rs12443881	intron_variant,non_coding_transcript_variant	16:28830456-28830456	T/C	0.4023	0.0265	0.0017	1.9e-57	795596	SH2B1
rs8055138	intron_variant	16:28880144-28880144	T/C	0.4038	0.0269	0.0017	7.2e-57	737455	SH2B1
rs8055138	regulatory_region_variant	16:28880144-28880144	T/C	0.4038	0.0269	0.0017	7.2e-57	737455	SH2B1
rs1013442	intron_variant,non_coding_transcript_variant	11:27557399-27557399	A/T	0.7606	0.0294	0.0019	1.6e-52	795301	BDNF
rs1013442	regulatory_region_variant	11:27557399-27557399	A/T	0.7606	0.0294	0.0019	1.6e-52	795301	BDNF
rs10734394	intron_variant,non_coding_transcript_variant	11:27606865-27606865	A/G	0.7588	0.0292	0.0019	1.8e-52	792798	BDNF
rs10742178	intron_variant,non_coding_transcript_variant	11:27592171-27592171	A/G	0.2408	-0.0291	0.0019	1.8e-52	795301	BDNF
rs10742178	regulatory_region_variant	11:27592171-27592171	A/G	0.2408	-0.0291	0.0019	1.8e-52	795301	BDNF
rs10767649	intron_variant,non_coding_transcript_variant	11:27592271-27592271	T/G	0.7582	0.0291	0.0019	2.5e-52	795342	BDNF
rs10767649	regulatory_region_variant	11:27592271-27592271	T/G	0.7582	0.0291	0.0019	2.5e-52	795342	BDNF
rs4923455	intron_variant,non_coding_transcript_variant	11:27572599-27572599	A/G	0.2405	-0.0288	0.0019	8.9e-52	795469	BDNF
rs7124596	intron_variant,non_coding_transcript_variant	11:27573011-27573011	A/G	0.2405	-0.0288	0.0019	1.7e-51	795542	BDNF
rs1906654	intron_variant,non_coding_transcript_variant	11:27552861-27552861	A/G	0.2404	-0.0287	0.0019	5.3e-51	795589	BDNF
rs9931989	intron_variant	16:28894763-28894763	C/G	0.641	-0.0257	0.0017	3.9e-50	793807	SH2B1
rs9931989	intron_variant,NMD_transcript_variant	16:28894763-28894763	C/G	0.641	-0.0257	0.0017	3.9e-50	793807	SH2B1
rs4788100	intron_variant	16:28853352-28853352	T/C	0.5971	-0.026	0.0018	1.7e-49	692604	SH2B1
rs7205323	intron_variant	16:28854571-28854571	T/C	0.4031	0.0259	0.0018	2e-49	692478	SH2B1
rs8062405	intron_variant	16:28826585-28826585	A/G	0.5961	-0.0257	0.0017	3.8e-49	692503	SH2B1
rs8062405	intron_variant,NMD_transcript_variant	16:28826585-28826585	A/G	0.5961	-0.0257	0.0017	3.8e-49	692503	SH2B1
rs8062405	intron_variant,non_coding_transcript_variant	16:28826585-28826585	A/G	0.5961	-0.0257	0.0017	3.8e-49	692503	SH2B1
rs8062405	non_coding_transcript_exon_variant	16:28826585-28826585	A/G	0.5961	-0.0257	0.0017	3.8e-49	692503	SH2B1
rs12325278	intergenic_variant	16:28837497-28837497	A/G	0.5963	-0.0258	0.0018	4.3e-49	692435	SH2B1
rs1488829	intron_variant,non_coding_transcript_variant	11:27530432-27530432	C/G	0.2418	-0.0282	0.0019	1.3e-48	795448	BDNF
rs6565259	synonymous_variant	16:28887472-28887472	T/C	0.6297	-0.025	0.0017	2.4e-48	785070	SH2B1
rs7187333	intron_variant	16:28854595-28854595	A/G	0.4014	0.0256	0.0018	2.6e-48	692470	SH2B1
rs10742179	intron_variant,non_coding_transcript_variant	11:27628977-27628977	A/G	0.2677	-0.0269	0.0018	6.1e-48	794964	BDNF
rs901925	intron_variant,non_coding_transcript_variant	11:27520922-27520922	T/C	0.7588	0.028	0.0019	8e-48	794479	BDNF
rs6484313	intron_variant,non_coding_transcript_variant	11:27520253-27520253	T/C	0.7588	0.028	0.0019	8.8e-48	794505	BDNF
rs12928404	intron_variant,non_coding_transcript_variant	16:28835925-28835925	T/C	0.5865	-0.0254	0.0018	9.1e-48	691290	SH2B1
rs12928404	splice_region_variant,intron_variant	16:28835925-28835925	T/C	0.5865	-0.0254	0.0018	9.1e-48	691290	SH2B1
rs12928404	splice_region_variant,intron_variant,NMD_transcript_variant	16:28835925-28835925	T/C	0.5865	-0.0254	0.0018	9.1e-48	691290	SH2B1
rs12928404	splice_region_variant,intron_variant,non_coding_transcript_variant	16:28835925-28835925	T/C	0.5865	-0.0254	0.0018	9.1e-48	691290	SH2B1
rs6484312	intron_variant,non_coding_transcript_variant	11:27520076-27520076	A/T	0.2412	-0.0279	0.0019	1e-47	783848	BDNF
rs2101467	intron_variant,non_coding_transcript_variant	11:27522812-27522812	A/G	0.2412	-0.0279	0.0019	1.1e-47	794321	BDNF
rs4923456	intron_variant,non_coding_transcript_variant	11:27587580-27587580	T/C	0.7594	0.0294	0.002	1.8e-47	692357	BDNF
rs9972768	intron_variant	16:28850413-28850413	A/C	0.5963	-0.0266	0.0018	2.5e-47	579697	SH2B1
rs9972693	intron_variant	16:28848481-28848481	A/G	0.5963	-0.0267	0.0019	8.8e-47	558456	SH2B1
rs11646653	intron_variant	16:28910828-28910828	T/C	0.6606	-0.0249	0.0017	1.4e-46	794902	SH2B1
rs11646653	non_coding_transcript_exon_variant	16:28910828-28910828	T/C	0.6606	-0.0249	0.0017	1.4e-46	794902	SH2B1
rs12444171	intron_variant	16:28833930-28833930	A/G	0.4036	0.0266	0.0019	1.7e-46	559349	SH2B1
rs12444171	intron_variant,NMD_transcript_variant	16:28833930-28833930	A/G	0.4036	0.0266	0.0019	1.7e-46	559349	SH2B1
rs12444171	intron_variant,non_coding_transcript_variant	16:28833930-28833930	A/G	0.4036	0.0266	0.0019	1.7e-46	559349	SH2B1
rs12444171	non_coding_transcript_exon_variant	16:28833930-28833930	A/G	0.4036	0.0266	0.0019	1.7e-46	559349	SH2B1
rs7189927	intron_variant	16:28902466-28902466	T/C	0.3586	0.0251	0.0017	1.8e-46	757896	SH2B1
rs7116850	intron_variant,non_coding_transcript_variant	11:27623983-27623983	A/G	0.729	0.0263	0.0018	2.4e-46	795214	BDNF
rs7116850	non_coding_transcript_exon_variant	11:27623983-27623983	A/G	0.729	0.0263	0.0018	2.4e-46	795214	BDNF
rs1304100	intron_variant,non_coding_transcript_variant	11:27550056-27550056	A/G	0.7565	0.029	0.002	3.2e-46	691594	BDNF
rs10835195	intron_variant,non_coding_transcript_variant	11:27555684-27555684	A/C	0.7596	0.0288	0.002	1e-45	691858	BDNF
rs4451951	intron_variant	16:28824884-28824884	T/C	0.5951	-0.0263	0.0019	1.2e-45	556217	SH2B1
rs4451951	intron_variant,non_coding_transcript_variant	16:28824884-28824884	T/C	0.5951	-0.0263	0.0019	1.2e-45	556217	SH2B1
rs4451951	regulatory_region_variant	16:28824884-28824884	T/C	0.5951	-0.0263	0.0019	1.2e-45	556217	SH2B1
rs988712	intron_variant,non_coding_transcript_variant	11:27541835-27541835	T/G	0.2409	-0.0285	0.002	1e-44	692370	BDNF
rs3924376	intron_variant	16:28914657-28914657	T/C	0.3364	0.0246	0.0018	2.1e-44	791296	SH2B1
rs3924376	intron_variant,non_coding_transcript_variant	16:28914657-28914657	T/C	0.3364	0.0246	0.0018	2.1e-44	791296	SH2B1
rs11030086	intron_variant,non_coding_transcript_variant	11:27624610-27624610	A/T	0.2804	-0.0255	0.0018	2.3e-44	793554	BDNF
rs1114029	intron_variant,non_coding_transcript_variant	11:27574434-27574434	T/C	0.2405	-0.0285	0.002	3e-44	639423	BDNF
rs3814883	synonymous_variant	16:29983601-29983601	T/C	0.4764	0.0232	0.0017	1.1e-40	685519	KCTD13
rs2904880	intron_variant	16:28933075-28933075	C/G	0.3292	0.024	0.0018	2.9e-40	737324	SH2B1
rs2904880	missense_variant	16:28933075-28933075	C/G	0.3292	0.024	0.0018	2.9e-40	737324	SH2B1
rs2904880	non_coding_transcript_exon_variant	16:28933075-28933075	C/G	0.3292	0.024	0.0018	2.9e-40	737324	SH2B1
rs7188071	intron_variant	16:28906323-28906323	T/C	0.3582	0.0252	0.0019	7.6e-40	558699	SH2B1
rs6416056	intron_variant,non_coding_transcript_variant	11:27625198-27625198	A/G	0.7285	0.0257	0.0019	1e-39	692308	BDNF
rs4922788	intron_variant,non_coding_transcript_variant	11:27589482-27589482	A/G	0.2406	-0.0288	0.0022	3.2e-39	536331	BDNF
rs7184597	intron_variant	16:28910488-28910488	T/C	0.338	0.0243	0.0019	4.9e-39	679834	SH2B1
rs7184597	non_coding_transcript_exon_variant	16:28910488-28910488	T/C	0.338	0.0243	0.0019	4.9e-39	679834	SH2B1
rs10499	3_prime_UTR_variant	16:28904206-28904206	A/G	0.643	-0.0247	0.0019	8.3e-39	576859	SH2B1
rs879620	3_prime_UTR_variant	16:3965728-3965728	T/C	0.6179	0.0231	0.0018	5.3e-38	688377	CREBBP
rs879620	intron_variant	16:3965728-3965728	T/C	0.6179	0.0231	0.0018	5.3e-38	688377	CREBBP
rs11649612	intergenic_variant	16:29935349-29935349	T/C	0.4595	-0.022	0.0017	2e-37	692025	KCTD13
rs4787486	intron_variant	16:29966241-29966241	A/T	0.5476	-0.022	0.0017	2.4e-37	691412	KCTD13
rs4787486	intron_variant,NMD_transcript_variant	16:29966241-29966241	A/T	0.5476	-0.022	0.0017	2.4e-37	691412	KCTD13
rs2278557	intron_variant	16:30082458-30082458	C/G	0.6006	-0.0224	0.0018	2.8e-37	692211	KCTD13
rs2278557	intron_variant,NMD_transcript_variant	16:30082458-30082458	C/G	0.6006	-0.0224	0.0018	2.8e-37	692211	KCTD13
rs2278557	intron_variant,non_coding_transcript_variant	16:30082458-30082458	C/G	0.6006	-0.0224	0.0018	2.8e-37	692211	KCTD13
rs6565173	5_prime_UTR_variant	16:29962846-29962846	A/G	0.4519	0.022	0.0017	3.1e-37	691469	KCTD13
rs6565173	intron_variant	16:29962846-29962846	A/G	0.4519	0.022	0.0017	3.1e-37	691469	KCTD13
rs6565173	regulatory_region_variant	16:29962846-29962846	A/G	0.4519	0.022	0.0017	3.1e-37	691469	KCTD13
rs11642612	intron_variant	16:30018874-30018874	A/C	0.6025	-0.0224	0.0018	3.4e-37	691850	KCTD13
rs11642612	intron_variant,non_coding_transcript_variant	16:30018874-30018874	A/C	0.6025	-0.0224	0.0018	3.4e-37	691850	KCTD13
rs11642612	non_coding_transcript_exon_variant	16:30018874-30018874	A/C	0.6025	-0.0224	0.0018	3.4e-37	691850	KCTD13
rs12716974	intergenic_variant	16:29933511-29933511	A/G	0.5405	0.022	0.0017	3.4e-37	692535	KCTD13
rs7204797	intron_variant	16:29956694-29956694	T/C	0.4524	0.0219	0.0017	3.9e-37	691515	KCTD13
rs12325539	intron_variant,non_coding_transcript_variant	16:30022312-30022312	T/C	0.6021	-0.0223	0.0018	4.2e-37	692480	KCTD13
rs11150581	intron_variant	16:30019378-30019378	T/C	0.6024	-0.0223	0.0018	5.2e-37	691895	KCTD13
rs11150581	intron_variant,non_coding_transcript_variant	16:30019378-30019378	T/C	0.6024	-0.0223	0.0018	5.2e-37	691895	KCTD13
rs11150580	intron_variant	16:30003243-30003243	T/C	0.4514	0.0226	0.0018	5.8e-37	637252	KCTD13
rs11150580	intron_variant,NMD_transcript_variant	16:30003243-30003243	T/C	0.4514	0.0226	0.0018	5.8e-37	637252	KCTD13
rs11150580	intron_variant,non_coding_transcript_variant	16:30003243-30003243	T/C	0.4514	0.0226	0.0018	5.8e-37	637252	KCTD13
rs11150580	non_coding_transcript_exon_variant	16:30003243-30003243	T/C	0.4514	0.0226	0.0018	5.8e-37	637252	KCTD13
rs4788196	intron_variant	16:29956113-29956113	A/G	0.5476	-0.0219	0.0017	6e-37	691522	KCTD13
rs11642740	intron_variant	16:30049334-30049334	A/G	0.6023	-0.0223	0.0018	8.2e-37	690384	KCTD13
rs12444978	intron_variant	16:29913101-29913101	A/T	0.4618	-0.0218	0.0017	9.6e-37	692475	KCTD13
rs12444978	intron_variant,NMD_transcript_variant	16:29913101-29913101	A/T	0.4618	-0.0218	0.0017	9.6e-37	692475	KCTD13
rs12444978	intron_variant,non_coding_transcript_variant	16:29913101-29913101	A/T	0.4618	-0.0218	0.0017	9.6e-37	692475	KCTD13
rs11901	intron_variant	16:29972749-29972749	C/G	0.5482	-0.0217	0.0017	1.7e-36	691805	KCTD13
rs11901	intron_variant,NMD_transcript_variant	16:29972749-29972749	C/G	0.5482	-0.0217	0.0017	1.7e-36	691805	KCTD13
rs3935873	3_prime_UTR_variant,NMD_transcript_variant	16:30007179-30007179	T/C	0.4515	0.0217	0.0017	1.9e-36	691646	KCTD13
rs3935873	non_coding_transcript_exon_variant	16:30007179-30007179	T/C	0.4515	0.0217	0.0017	1.9e-36	691646	KCTD13
rs3935873	synonymous_variant	16:30007179-30007179	T/C	0.4515	0.0217	0.0017	1.9e-36	691646	KCTD13
rs3935873	synonymous_variant,NMD_transcript_variant	16:30007179-30007179	T/C	0.4515	0.0217	0.0017	1.9e-36	691646	KCTD13
rs4788209	intron_variant	16:30001945-30001945	T/C	0.4512	0.0218	0.0017	2.2e-36	691679	KCTD13
rs4788209	intron_variant,NMD_transcript_variant	16:30001945-30001945	T/C	0.4512	0.0218	0.0017	2.2e-36	691679	KCTD13
rs4788209	non_coding_transcript_exon_variant	16:30001945-30001945	T/C	0.4512	0.0218	0.0017	2.2e-36	691679	KCTD13
rs3814880	intron_variant	16:30006574-30006574	T/C	0.5481	-0.0217	0.0017	2.3e-36	691894	KCTD13
rs3814880	intron_variant,NMD_transcript_variant	16:30006574-30006574	T/C	0.5481	-0.0217	0.0017	2.3e-36	691894	KCTD13
rs3814880	intron_variant,non_coding_transcript_variant	16:30006574-30006574	T/C	0.5481	-0.0217	0.0017	2.3e-36	691894	KCTD13
rs4407079	3_prime_UTR_variant	16:29920578-29920578	A/G	0.5385	0.0217	0.0017	2.4e-36	692449	KCTD13
rs4407079	3_prime_UTR_variant,NMD_transcript_variant	16:29920578-29920578	A/G	0.5385	0.0217	0.0017	2.4e-36	692449	KCTD13
rs4407079	intron_variant	16:29920578-29920578	A/G	0.5385	0.0217	0.0017	2.4e-36	692449	KCTD13
rs4407079	intron_variant,NMD_transcript_variant	16:29920578-29920578	A/G	0.5385	0.0217	0.0017	2.4e-36	692449	KCTD13
rs4407079	intron_variant,non_coding_transcript_variant	16:29920578-29920578	A/G	0.5385	0.0217	0.0017	2.4e-36	692449	KCTD13
rs4788204	intron_variant	16:29983897-29983897	A/G	0.4526	0.0217	0.0017	2.5e-36	692200	KCTD13
rs4318227	intergenic_variant	16:29973518-29973518	C/G	0.5482	-0.0216	0.0017	2.7e-36	692365	KCTD13
rs4609871	3_prime_UTR_variant	16:29920743-29920743	T/C	0.5391	0.0217	0.0017	2.7e-36	692522	KCTD13
rs4609871	3_prime_UTR_variant,NMD_transcript_variant	16:29920743-29920743	T/C	0.5391	0.0217	0.0017	2.7e-36	692522	KCTD13
rs4609871	intron_variant	16:29920743-29920743	T/C	0.5391	0.0217	0.0017	2.7e-36	692522	KCTD13
rs4609871	intron_variant,NMD_transcript_variant	16:29920743-29920743	T/C	0.5391	0.0217	0.0017	2.7e-36	692522	KCTD13
rs4609871	intron_variant,non_coding_transcript_variant	16:29920743-29920743	T/C	0.5391	0.0217	0.0017	2.7e-36	692522	KCTD13
rs3814881	intron_variant	16:29989580-29989580	A/G	0.4518	0.0216	0.0017	3e-36	691928	KCTD13
rs4283241	intron_variant	16:29977028-29977028	A/G	0.4522	0.0216	0.0017	3.1e-36	692437	KCTD13
rs11150577	intron_variant	16:29975204-29975204	A/G	0.4518	0.0216	0.0017	3.6e-36	692494	KCTD13
rs9925915	intron_variant	16:29982365-29982365	C/G	0.4522	0.0216	0.0017	3.8e-36	692501	KCTD13
rs4787489	intron_variant	16:29984559-29984559	A/G	0.4516	0.0216	0.0017	4.7e-36	692242	KCTD13
rs9924686	3_prime_UTR_variant	16:29991755-29991755	A/G	0.4518	0.0216	0.0017	5.3e-36	692366	KCTD13
rs3814884	intron_variant	16:29983415-29983415	A/T	0.4516	0.0216	0.0017	8.1e-36	692150	KCTD13
rs4583255	intron_variant	16:29977620-29977620	A/G	0.5483	-0.0215	0.0017	1.2e-35	692036	KCTD13
rs4583255	regulatory_region_variant	16:29977620-29977620	A/G	0.5483	-0.0215	0.0017	1.2e-35	692036	KCTD13
rs2531995	3_prime_UTR_variant	16:3963466-3963466	T/C	0.6217	0.0222	0.0018	2e-35	692575	CREBBP
rs2531995	intron_variant	16:3963466-3963466	T/C	0.6217	0.0222	0.0018	2e-35	692575	CREBBP
rs4072402	intron_variant	16:28925938-28925938	T/C	0.3389	0.0238	0.0019	7.9e-35	556003	SH2B1
rs4072402	regulatory_region_variant	16:28925938-28925938	T/C	0.3389	0.0238	0.0019	7.9e-35	556003	SH2B1
rs12716973	5_prime_UTR_variant	16:29926331-29926331	A/G	0.5435	0.021	0.0017	3.7e-34	692129	KCTD13
rs12716973	regulatory_region_variant	16:29926331-29926331	A/G	0.5435	0.021	0.0017	3.7e-34	692129	KCTD13
rs12716972	intron_variant	16:29925333-29925333	A/G	0.4567	-0.0209	0.0017	1.2e-33	692460	KCTD13
rs12716972	intron_variant,NMD_transcript_variant	16:29925333-29925333	A/G	0.4567	-0.0209	0.0017	1.2e-33	692460	KCTD13
rs12716972	intron_variant,non_coding_transcript_variant	16:29925333-29925333	A/G	0.4567	-0.0209	0.0017	1.2e-33	692460	KCTD13
rs4787491	intron_variant	16:30004016-30004016	A/G	0.4636	-0.0177	0.0017	4.2e-26	739894	KCTD13
rs4787491	intron_variant,NMD_transcript_variant	16:30004016-30004016	A/G	0.4636	-0.0177	0.0017	4.2e-26	739894	KCTD13
rs4787491	intron_variant,non_coding_transcript_variant	16:30004016-30004016	A/G	0.4636	-0.0177	0.0017	4.2e-26	739894	KCTD13
rs4787491	non_coding_transcript_exon_variant	16:30004016-30004016	A/G	0.4636	-0.0177	0.0017	4.2e-26	739894	KCTD13
rs4788199	intron_variant	16:29959536-29959536	C/G	0.4759	-0.018	0.0017	2.1e-25	684897	KCTD13
rs7164727	intergenic_variant	15:72801650-72801650	T/C	0.681	0.0182	0.0017	3.3e-25	791156	BBS4
rs4077410	intron_variant	16:29986879-29986879	A/G	0.4751	-0.0184	0.0018	3.6e-25	638001	KCTD13
rs4077410	non_coding_transcript_exon_variant	16:29986879-29986879	A/G	0.4751	-0.0184	0.0018	3.6e-25	638001	KCTD13
rs4077410	synonymous_variant	16:29986879-29986879	A/G	0.4751	-0.0184	0.0018	3.6e-25	638001	KCTD13
rs8030477	intron_variant,non_coding_transcript_variant	15:72793474-72793474	T/C	0.6805	0.0181	0.0017	4.4e-25	790159	BBS4
rs4787488	intron_variant	16:29984482-29984482	A/C	0.4753	-0.0176	0.0017	1.2e-24	692257	KCTD13
rs11649149	intron_variant	16:29997323-29997323	T/C	0.5246	0.0176	0.0017	1.4e-24	692031	KCTD13
rs11649149	intron_variant,NMD_transcript_variant	16:29997323-29997323	T/C	0.5246	0.0176	0.0017	1.4e-24	692031	KCTD13
rs11649149	intron_variant,non_coding_transcript_variant	16:29997323-29997323	T/C	0.5246	0.0176	0.0017	1.4e-24	692031	KCTD13
rs8027181	intron_variant,non_coding_transcript_variant	15:72796528-72796528	A/T	0.3195	-0.0183	0.0019	4.9e-23	688732	BBS4
rs8027181	regulatory_region_variant	15:72796528-72796528	A/T	0.3195	-0.0183	0.0019	4.9e-23	688732	BBS4
rs4777542	intron_variant,non_coding_transcript_variant	15:72790025-72790025	T/C	0.3165	-0.0183	0.0019	8.9e-23	681946	BBS4
rs12439200	intron_variant,non_coding_transcript_variant	15:72794390-72794390	A/G	0.2271	-0.0189	0.0021	3.3e-20	689092	BBS4
rs4776614	intron_variant,non_coding_transcript_variant	15:72790127-72790127	C/G	0.3166	-0.0184	0.002	4.8e-20	525219	BBS4
rs8033073	intron_variant	15:72758752-72758752	A/G	0.6427	0.0163	0.0018	6.3e-20	691101	BBS4
rs8033073	intron_variant,NMD_transcript_variant	15:72758752-72758752	A/G	0.6427	0.0163	0.0018	6.3e-20	691101	BBS4
rs8033073	intron_variant,non_coding_transcript_variant	15:72758752-72758752	A/G	0.6427	0.0163	0.0018	6.3e-20	691101	BBS4
rs8033073	regulatory_region_variant	15:72758752-72758752	A/G	0.6427	0.0163	0.0018	6.3e-20	691101	BBS4
rs10459647	intergenic_variant	15:72742900-72742900	T/C	0.3561	-0.0163	0.0018	7.2e-20	691064	BBS4
rs4777541	intron_variant,non_coding_transcript_variant	15:72789899-72789899	T/C	0.7757	0.0188	0.0021	7.3e-20	688603	BBS4
rs8025333	intron_variant	15:72732780-72732780	A/G	0.3565	-0.0161	0.0018	1.4e-19	691760	BBS4
rs8025333	intron_variant,NMD_transcript_variant	15:72732780-72732780	A/G	0.3565	-0.0161	0.0018	1.4e-19	691760	BBS4
rs8025333	intron_variant,non_coding_transcript_variant	15:72732780-72732780	A/G	0.3565	-0.0161	0.0018	1.4e-19	691760	BBS4
rs9460	3_prime_UTR_variant	15:72752234-72752234	A/G	0.642	0.0163	0.0018	1.5e-19	690067	BBS4
rs9460	3_prime_UTR_variant,NMD_transcript_variant	15:72752234-72752234	A/G	0.642	0.0163	0.0018	1.5e-19	690067	BBS4
rs9460	non_coding_transcript_exon_variant	15:72752234-72752234	A/G	0.642	0.0163	0.0018	1.5e-19	690067	BBS4
rs8024986	intron_variant	15:72732527-72732527	T/C	0.6397	0.0161	0.0018	1.7e-19	692489	BBS4
rs8024986	intron_variant,NMD_transcript_variant	15:72732527-72732527	T/C	0.6397	0.0161	0.0018	1.7e-19	692489	BBS4
rs8024986	intron_variant,non_coding_transcript_variant	15:72732527-72732527	T/C	0.6397	0.0161	0.0018	1.7e-19	692489	BBS4
rs2277598	3_prime_UTR_variant,NMD_transcript_variant	15:72735137-72735137	T/C	0.3559	-0.0161	0.0018	2.2e-19	692591	BBS4
rs2277598	missense_variant	15:72735137-72735137	T/C	0.3559	-0.0161	0.0018	2.2e-19	692591	BBS4
rs2277598	non_coding_transcript_exon_variant	15:72735137-72735137	T/C	0.3559	-0.0161	0.0018	2.2e-19	692591	BBS4
rs2277598	regulatory_region_variant	15:72735137-72735137	T/C	0.3559	-0.0161	0.0018	2.2e-19	692591	BBS4
rs2304597	intron_variant	15:72760090-72760090	A/G	0.356	-0.0162	0.0018	2.2e-19	691145	BBS4
rs2304597	intron_variant,NMD_transcript_variant	15:72760090-72760090	A/G	0.356	-0.0162	0.0018	2.2e-19	691145	BBS4
rs2304597	intron_variant,non_coding_transcript_variant	15:72760090-72760090	A/G	0.356	-0.0162	0.0018	2.2e-19	691145	BBS4
rs8033580	intron_variant	15:72702627-72702627	A/C	0.6448	0.0161	0.0018	5e-19	690131	BBS4
rs8033580	intron_variant,NMD_transcript_variant	15:72702627-72702627	A/C	0.6448	0.0161	0.0018	5e-19	690131	BBS4
rs8033580	intron_variant,non_coding_transcript_variant	15:72702627-72702627	A/C	0.6448	0.0161	0.0018	5e-19	690131	BBS4
rs7167076	intron_variant	15:72736532-72736532	A/G	0.3566	-0.0159	0.0018	5.3e-19	690862	BBS4
rs7167076	intron_variant,NMD_transcript_variant	15:72736532-72736532	A/G	0.3566	-0.0159	0.0018	5.3e-19	690862	BBS4
rs7167076	intron_variant,non_coding_transcript_variant	15:72736532-72736532	A/G	0.3566	-0.0159	0.0018	5.3e-19	690862	BBS4
rs730180	intron_variant	15:72715552-72715552	A/G	0.7886	0.0176	0.002	5.4e-19	792607	BBS4
rs730180	intron_variant,NMD_transcript_variant	15:72715552-72715552	A/G	0.7886	0.0176	0.002	5.4e-19	792607	BBS4
rs730180	intron_variant,non_coding_transcript_variant	15:72715552-72715552	A/G	0.7886	0.0176	0.002	5.4e-19	792607	BBS4
rs11631352	intron_variant,non_coding_transcript_variant	15:72794132-72794132	A/G	0.6395	0.0161	0.0018	5.8e-19	687255	BBS4
rs7176235	intron_variant	15:72706763-72706763	A/G	0.3597	-0.0159	0.0018	1.1e-18	689430	BBS4
rs7176235	intron_variant,NMD_transcript_variant	15:72706763-72706763	A/G	0.3597	-0.0159	0.0018	1.1e-18	689430	BBS4
rs7176235	intron_variant,non_coding_transcript_variant	15:72706763-72706763	A/G	0.3597	-0.0159	0.0018	1.1e-18	689430	BBS4
rs7178130	5_prime_UTR_variant	15:72685861-72685861	A/G	0.6379	0.0156	0.0018	6.8e-18	688608	BBS4
rs7178130	regulatory_region_variant	15:72685861-72685861	A/G	0.6379	0.0156	0.0018	6.8e-18	688608	BBS4
rs11072384	intron_variant	15:72708973-72708973	T/C	0.2085	-0.0178	0.0021	1.7e-17	691516	BBS4
rs11072384	intron_variant,NMD_transcript_variant	15:72708973-72708973	T/C	0.2085	-0.0178	0.0021	1.7e-17	691516	BBS4
rs11072384	intron_variant,non_coding_transcript_variant	15:72708973-72708973	T/C	0.2085	-0.0178	0.0021	1.7e-17	691516	BBS4
rs7176223	intron_variant	15:72785401-72785401	T/G	0.3493	-0.0156	0.0018	2.8e-17	633050	BBS4
rs7176223	intron_variant,non_coding_transcript_variant	15:72785401-72785401	T/G	0.3493	-0.0156	0.0018	2.8e-17	633050	BBS4
rs4777546	intergenic_variant	15:72812094-72812094	A/G	0.3811	-0.0149	0.0018	4.3e-17	686669	BBS4
rs2012253	intron_variant	15:72715782-72715782	A/G	0.209	-0.0175	0.0022	5.1e-16	636285	BBS4
rs2012253	intron_variant,NMD_transcript_variant	15:72715782-72715782	A/G	0.209	-0.0175	0.0022	5.1e-16	636285	BBS4
rs2012253	intron_variant,non_coding_transcript_variant	15:72715782-72715782	A/G	0.209	-0.0175	0.0022	5.1e-16	636285	BBS4
rs946824	intron_variant	1:243520717-243520717	T/C	0.141	0.0206	0.0026	1.1e-15	689849	SDCCAG8
rs7523198	intron_variant	1:243538964-243538964	T/C	0.8571	-0.0203	0.0026	1.6e-15	689821	SDCCAG8
rs3753549	intron_variant	1:243559590-243559590	T/C	0.8563	-0.0203	0.0025	1.7e-15	691062	SDCCAG8
rs4658403	intron_variant	1:243669258-243669258	T/C	0.8221	-0.0185	0.0023	1.9e-15	690620	SDCCAG8
rs4658403	intron_variant,non_coding_transcript_variant	1:243669258-243669258	T/C	0.8221	-0.0185	0.0023	1.9e-15	690620	SDCCAG8
rs6704286	intron_variant	1:243515087-243515087	T/G	0.145	0.0203	0.0026	2.8e-15	690606	SDCCAG8
rs320334	intron_variant	1:243644730-243644730	A/T	0.1438	0.0201	0.0025	2.9e-15	691226	SDCCAG8
rs6688135	intron_variant	1:243580172-243580172	A/C	0.8561	-0.0198	0.0025	4.6e-15	691592	SDCCAG8
rs6688135	regulatory_region_variant	1:243580172-243580172	A/C	0.8561	-0.0198	0.0025	4.6e-15	691592	SDCCAG8
rs320302	intron_variant	1:243598433-243598433	A/G	0.8562	-0.0198	0.0025	5.2e-15	691582	SDCCAG8
rs320302	regulatory_region_variant	1:243598433-243598433	A/G	0.8562	-0.0198	0.0025	5.2e-15	691582	SDCCAG8
rs7552982	intron_variant	1:243574126-243574126	T/C	0.8563	-0.0197	0.0025	5.9e-15	691704	SDCCAG8
rs320309	intron_variant	1:243617872-243617872	A/G	0.8567	-0.0197	0.0025	8.1e-15	691568	SDCCAG8
rs320331	intron_variant	1:243634515-243634515	A/G	0.1429	0.0192	0.0025	3.2e-14	688115	SDCCAG8
rs167661	intron_variant	1:243665004-243665004	A/T	0.863	-0.0194	0.0026	5e-14	690820	SDCCAG8
rs167661	intron_variant,non_coding_transcript_variant	1:243665004-243665004	A/T	0.863	-0.0194	0.0026	5e-14	690820	SDCCAG8
rs320330	intron_variant	1:243634906-243634906	T/G	0.8255	-0.0177	0.0024	1.4e-13	688697	SDCCAG8
rs7517732	intron_variant	1:243658062-243658062	T/C	0.1365	0.019	0.0026	2.3e-13	690618	SDCCAG8
rs320332	intron_variant	1:243634497-243634497	A/C	0.8257	-0.0172	0.0024	5.9e-13	684960	SDCCAG8
rs12448738	intron_variant	16:56455431-56455431	A/C	0.8629	-0.0168	0.0025	2.8e-11	691932	BBS2
rs12448738	intron_variant,NMD_transcript_variant	16:56455431-56455431	A/C	0.8629	-0.0168	0.0025	2.8e-11	691932	BBS2
rs12448738	intron_variant,non_coding_transcript_variant	16:56455431-56455431	A/C	0.8629	-0.0168	0.0025	2.8e-11	691932	BBS2
rs7523742	intron_variant	1:243524848-243524848	A/G	0.0922	0.0206	0.0031	4.1e-11	691627	SDCCAG8
rs7189122	intron_variant	16:56437498-56437498	T/C	0.8299	-0.015	0.0023	4.5e-11	692600	BBS2
rs12444921	intron_variant	16:56469504-56469504	T/G	0.8682	-0.0166	0.0025	4.7e-11	692218	BBS2
rs12444921	intron_variant,NMD_transcript_variant	16:56469504-56469504	T/G	0.8682	-0.0166	0.0025	4.7e-11	692218	BBS2
rs320308	intron_variant	1:243616896-243616896	A/G	0.1232	0.018	0.0027	4.8e-11	691026	SDCCAG8
rs2288055	intron_variant	16:56467894-56467894	T/C	0.1362	0.0166	0.0025	4.9e-11	692220	BBS2
rs2288055	intron_variant,NMD_transcript_variant	16:56467894-56467894	T/C	0.1362	0.0166	0.0025	4.9e-11	692220	BBS2
rs12206564	intron_variant	6:100539133-100539133	T/C	0.505	-0.0113	0.0017	5.4e-11	689836	SIM1
rs12660725	intron_variant	6:100530694-100530694	T/C	0.4715	0.0113	0.0017	5.5e-11	689836	SIM1
rs12660725	non_coding_transcript_exon_variant	6:100530694-100530694	T/C	0.4715	0.0113	0.0017	5.5e-11	689836	SIM1
rs2001102	intron_variant	6:100530475-100530475	T/C	0.4725	0.0113	0.0017	5.5e-11	689919	SIM1
rs2001102	non_coding_transcript_exon_variant	6:100530475-100530475	T/C	0.4725	0.0113	0.0017	5.5e-11	689919	SIM1
rs11155496	intron_variant	6:100541063-100541063	T/C	0.5272	-0.0113	0.0017	5.6e-11	689912	SIM1
rs240164	intron_variant	6:100596611-100596611	A/T	0.5306	-0.0113	0.0017	5.6e-11	688419	SIM1
rs2398132	intron_variant	6:100533324-100533324	A/C	0.5267	-0.0113	0.0017	5.8e-11	689879	SIM1
rs108422	intron_variant	6:100591403-100591403	C/G	0.5307	-0.0113	0.0017	6e-11	689275	SIM1
rs1187352	intron_variant	9:84678542-84678542	T/C	0.3482	-0.0119	0.0018	6e-11	688522	NTRK2
rs11640452	intron_variant	16:56491148-56491148	A/G	0.1725	0.0152	0.0023	6.1e-11	692303	BBS2
rs11640452	intron_variant,non_coding_transcript_variant	16:56491148-56491148	A/G	0.1725	0.0152	0.0023	6.1e-11	692303	BBS2
rs240764	intergenic_variant	6:100505272-100505272	A/G	0.4692	0.0114	0.0017	6.2e-11	679526	SIM1
rs240764	regulatory_region_variant	6:100505272-100505272	A/G	0.4692	0.0114	0.0017	6.2e-11	679526	SIM1
rs8049949	intron_variant	16:56496465-56496465	A/G	0.8652	-0.0164	0.0025	7.4e-11	692333	BBS2
rs8049949	intron_variant,non_coding_transcript_variant	16:56496465-56496465	A/G	0.8652	-0.0164	0.0025	7.4e-11	692333	BBS2
rs10457809	intron_variant	6:100536524-100536524	T/C	0.4725	0.0112	0.0017	7.5e-11	690549	SIM1
rs4461738	intron_variant	6:100530064-100530064	T/C	0.5275	-0.0113	0.0017	7.5e-11	683905	SIM1
rs11155498	intron_variant	6:100571675-100571675	C/G	0.4732	0.0113	0.0017	7.7e-11	688314	SIM1
rs1875400	intron_variant	6:100573092-100573092	T/C	0.5268	-0.0112	0.0017	7.9e-11	688844	SIM1
rs3228	3_prime_UTR_variant	16:56477333-56477333	T/G	0.865	-0.0164	0.0025	7.9e-11	691695	BBS2
rs3228	intron_variant	16:56477333-56477333	T/G	0.865	-0.0164	0.0025	7.9e-11	691695	BBS2
rs3228	regulatory_region_variant	16:56477333-56477333	T/G	0.865	-0.0164	0.0025	7.9e-11	691695	BBS2
rs918784	3_prime_UTR_variant	16:56478857-56478857	A/G	0.8637	-0.0164	0.0025	8e-11	692277	BBS2
rs918784	intron_variant	16:56478857-56478857	A/G	0.8637	-0.0164	0.0025	8e-11	692277	BBS2
rs11649379	intron_variant	16:56459661-56459661	T/C	0.1716	0.0147	0.0023	9.3e-11	691694	BBS2
rs11649379	intron_variant,NMD_transcript_variant	16:56459661-56459661	T/C	0.1716	0.0147	0.0023	9.3e-11	691694	BBS2
rs11649379	intron_variant,non_coding_transcript_variant	16:56459661-56459661	T/C	0.1716	0.0147	0.0023	9.3e-11	691694	BBS2
rs2288056	intron_variant	16:56485185-56485185	A/G	0.8651	-0.0163	0.0025	9.9e-11	692328	BBS2
rs2288056	intron_variant,non_coding_transcript_variant	16:56485185-56485185	A/G	0.8651	-0.0163	0.0025	9.9e-11	692328	BBS2
rs10457808	intron_variant	6:100531630-100531630	A/T	0.527	-0.0111	0.0017	1e-10	690454	SIM1
rs12206945	intron_variant	6:100570156-100570156	A/G	0.5265	-0.0111	0.0017	1e-10	687449	SIM1
rs12447395	intron_variant	16:56495428-56495428	T/C	0.8617	-0.0163	0.0025	1.1e-10	690595	BBS2
rs12447395	intron_variant,non_coding_transcript_variant	16:56495428-56495428	T/C	0.8617	-0.0163	0.0025	1.1e-10	690595	BBS2
rs2062634	intron_variant	6:100554742-100554742	C/G	0.4712	0.0111	0.0017	1.1e-10	689132	SIM1
rs12374612	intergenic_variant	6:100507876-100507876	T/C	0.4739	0.0111	0.0017	1.3e-10	686656	SIM1
rs2161738	intron_variant	16:56508428-56508428	C/G	0.8651	-0.0162	0.0025	1.3e-10	689414	BBS2
rs2161738	intron_variant,NMD_transcript_variant	16:56508428-56508428	C/G	0.8651	-0.0162	0.0025	1.3e-10	689414	BBS2
rs2161738	intron_variant,non_coding_transcript_variant	16:56508428-56508428	C/G	0.8651	-0.0162	0.0025	1.3e-10	689414	BBS2
rs1875401	intron_variant	6:100575712-100575712	A/G	0.4723	0.011	0.0017	1.7e-10	689270	SIM1
rs239236	intron_variant	6:100651341-100651341	A/G	0.4854	0.011	0.0017	1.7e-10	688198	SIM1
rs239236	intron_variant,NMD_transcript_variant	6:100651341-100651341	A/G	0.4854	0.011	0.0017	1.7e-10	688198	SIM1
rs12447295	intron_variant	16:56508209-56508209	T/C	0.8286	-0.0145	0.0023	1.8e-10	689412	BBS2
rs12447295	intron_variant,NMD_transcript_variant	16:56508209-56508209	T/C	0.8286	-0.0145	0.0023	1.8e-10	689412	BBS2
rs12447295	intron_variant,non_coding_transcript_variant	16:56508209-56508209	T/C	0.8286	-0.0145	0.0023	1.8e-10	689412	BBS2
rs240115	intron_variant	6:100605193-100605193	T/C	0.4655	0.011	0.0017	2.1e-10	687546	SIM1
rs239226	intron_variant	6:100660093-100660093	C/G	0.5363	-0.011	0.0017	2.4e-10	682574	SIM1
rs239226	intron_variant,NMD_transcript_variant	6:100660093-100660093	C/G	0.5363	-0.011	0.0017	2.4e-10	682574	SIM1
rs151640	intron_variant	6:100663645-100663645	A/C	0.4863	0.0109	0.0017	2.6e-10	688383	SIM1
rs151640	intron_variant,NMD_transcript_variant	6:100663645-100663645	A/C	0.4863	0.0109	0.0017	2.6e-10	688383	SIM1
rs151640	regulatory_region_variant	6:100663645-100663645	A/C	0.4863	0.0109	0.0017	2.6e-10	688383	SIM1
rs240113	intron_variant	6:100611010-100611010	A/G	0.5332	-0.0109	0.0017	3e-10	685976	SIM1
rs239234	intron_variant	6:100653358-100653358	A/G	0.5144	-0.0108	0.0017	3.3e-10	688209	SIM1
rs239234	intron_variant,NMD_transcript_variant	6:100653358-100653358	A/G	0.5144	-0.0108	0.0017	3.3e-10	688209	SIM1
rs239223	intron_variant	6:100664469-100664469	A/G	0.4637	0.0108	0.0017	3.4e-10	688338	SIM1
rs239223	intron_variant,NMD_transcript_variant	6:100664469-100664469	A/G	0.4637	0.0108	0.0017	3.4e-10	688338	SIM1
rs239223	regulatory_region_variant	6:100664469-100664469	A/G	0.4637	0.0108	0.0017	3.4e-10	688338	SIM1
rs454747	intron_variant	6:100607690-100607690	T/C	0.4855	0.0111	0.0018	3.4e-10	633288	SIM1
rs239249	intron_variant	6:100639205-100639205	A/G	0.5368	-0.0108	0.0017	3.6e-10	687611	SIM1
rs240154	intron_variant	6:100617916-100617916	T/G	0.5364	-0.0108	0.0017	3.6e-10	687330	SIM1
rs1260326	missense_variant,splice_region_variant	2:27508073-27508073	T/C	0.4027	-0.0105	0.0017	3.9e-10	784462	IFT172
rs1260326	splice_region_variant,non_coding_transcript_exon_variant	2:27508073-27508073	T/C	0.4027	-0.0105	0.0017	3.9e-10	784462	IFT172
rs151573	intron_variant	6:100638457-100638457	T/C	0.4636	0.0108	0.0017	4e-10	688146	SIM1
rs239229	intron_variant	6:100658099-100658099	T/C	0.4637	0.0108	0.0017	4e-10	689160	SIM1
rs239229	intron_variant,NMD_transcript_variant	6:100658099-100658099	T/C	0.4637	0.0108	0.0017	4e-10	689160	SIM1
rs239229	regulatory_region_variant	6:100658099-100658099	T/C	0.4637	0.0108	0.0017	4e-10	689160	SIM1
rs240146	intron_variant	6:100630842-100630842	A/G	0.5362	-0.0108	0.0017	4.1e-10	686671	SIM1
rs151572	intron_variant	6:100663108-100663108	T/C	0.5363	-0.0108	0.0017	4.2e-10	689212	SIM1
rs151572	intron_variant,NMD_transcript_variant	6:100663108-100663108	T/C	0.5363	-0.0108	0.0017	4.2e-10	689212	SIM1
rs151572	regulatory_region_variant	6:100663108-100663108	T/C	0.5363	-0.0108	0.0017	4.2e-10	689212	SIM1
rs239232	intron_variant	6:100655162-100655162	A/G	0.5364	-0.0108	0.0017	4.2e-10	688939	SIM1
rs239232	intron_variant,NMD_transcript_variant	6:100655162-100655162	A/G	0.5364	-0.0108	0.0017	4.2e-10	688939	SIM1
rs239238	intron_variant	6:100647004-100647004	T/G	0.5364	-0.0108	0.0017	4.4e-10	688059	SIM1
rs239239	synonymous_variant	6:100646678-100646678	A/G	0.4638	0.0108	0.0017	4.5e-10	688140	SIM1
rs239242	intron_variant	6:100644900-100644900	T/C	0.5364	-0.0107	0.0017	5.1e-10	688801	SIM1
rs239247	intron_variant	6:100640474-100640474	T/C	0.4637	0.0106	0.0017	6.4e-10	688919	SIM1
rs11792069	intron_variant	9:137751669-137751669	A/G	0.83	0.0145	0.0024	6.5e-10	644252	EHMT1
rs11792069	intron_variant,NMD_transcript_variant	9:137751669-137751669	A/G	0.83	0.0145	0.0024	6.5e-10	644252	EHMT1
rs11792069	intron_variant,non_coding_transcript_variant	9:137751669-137751669	A/G	0.83	0.0145	0.0024	6.5e-10	644252	EHMT1
rs7184983	intergenic_variant	16:56520797-56520797	A/G	0.1323	0.0159	0.0026	6.8e-10	692044	BBS2
rs239245	intron_variant	6:100642501-100642501	A/C	0.5362	-0.0109	0.0018	8.6e-10	633839	SIM1
rs7975791	3_prime_UTR_variant	12:49019703-49019703	T/C	0.03601	-0.0264	0.0043	1.1e-09	770139	KMT2D
rs3006927	intron_variant	1:243494097-243494097	T/C	0.8332	-0.0147	0.0024	1.2e-09	691638	SDCCAG8
rs3006927	intron_variant,non_coding_transcript_variant	1:243494097-243494097	T/C	0.8332	-0.0147	0.0024	1.2e-09	691638	SDCCAG8
rs1187351	intron_variant	9:84680162-84680162	A/C	0.3993	-0.0106	0.0018	2.1e-09	687350	NTRK2
rs1619120	intron_variant	9:84687281-84687281	A/G	0.4013	-0.0099	0.0017	2.4e-09	791760	NTRK2
rs240762	intron_variant	6:100537698-100537698	T/C	0.5759	0.0103	0.0017	2.8e-09	691458	SIM1
rs12628891	intron_variant	22:37921130-37921130	T/C	0.3169	-0.0112	0.0019	3e-09	686575	SOX10
rs12628891	intron_variant,non_coding_transcript_variant	22:37921130-37921130	T/C	0.3169	-0.0112	0.0019	3e-09	686575	SOX10
rs240780	missense_variant	6:100516271-100516271	C/G	0.5761	0.0103	0.0017	3e-09	692409	SIM1
rs240783	intron_variant	6:100520861-100520861	T/C	0.4241	-0.0103	0.0017	3.2e-09	691239	SIM1
rs726432	intron_variant,non_coding_transcript_variant	9:84632533-84632533	T/C	0.585	0.0104	0.0017	3.2e-09	691787	NTRK2
rs9485165	intron_variant	6:100557598-100557598	A/G	0.4234	-0.0103	0.0017	3.2e-09	689965	SIM1
rs240770	intron_variant	6:100562324-100562324	A/G	0.5767	0.0103	0.0017	3.3e-09	690471	SIM1
rs240771	intron_variant	6:100561947-100561947	T/C	0.4184	-0.0103	0.0017	3.3e-09	687981	SIM1
rs11373	5_prime_UTR_variant	16:56511263-56511263	T/C	0.8289	-0.0144	0.0024	3.4e-09	555283	BBS2
rs11373	missense_variant	16:56511263-56511263	T/C	0.8289	-0.0144	0.0024	3.4e-09	555283	BBS2
rs11373	non_coding_transcript_exon_variant	16:56511263-56511263	T/C	0.8289	-0.0144	0.0024	3.4e-09	555283	BBS2
rs12478556	intergenic_variant	2:63114576-63114576	A/T	0.4177	0.0103	0.0018	4.5e-09	683709	WDPCP
rs1006399	intron_variant	6:100591594-100591594	A/G	0.4533	-0.0101	0.0017	4.6e-09	688931	SIM1
rs3006928	intron_variant	1:243494728-243494728	A/G	0.1498	0.0151	0.0026	4.7e-09	684732	SDCCAG8
rs3006928	intron_variant,non_coding_transcript_variant	1:243494728-243494728	A/G	0.1498	0.0151	0.0026	4.7e-09	684732	SDCCAG8
rs240152	intron_variant	6:100619613-100619613	C/G	0.5284	-0.01	0.0017	5.7e-09	687518	SIM1
rs240151	intron_variant	6:100619844-100619844	A/T	0.4716	0.01	0.0017	6.1e-09	687519	SIM1
rs5750508	intron_variant	22:37907148-37907148	T/C	0.3224	-0.0108	0.0019	6.3e-09	688225	SOX10
rs5750508	non_coding_transcript_exon_variant	22:37907148-37907148	T/C	0.3224	-0.0108	0.0019	6.3e-09	688225	SOX10
rs5750508	regulatory_region_variant	22:37907148-37907148	T/C	0.3224	-0.0108	0.0019	6.3e-09	688225	SOX10
rs11649864	intergenic_variant	17:58015700-58015700	A/G	0.09127	0.0178	0.0031	6.7e-09	663638	MKS1
rs1187336	intron_variant	9:84701953-84701953	A/T	0.373	-0.0103	0.0018	7e-09	692361	NTRK2
rs1187337	intron_variant	9:84701122-84701122	T/C	0.4519	-0.01	0.0017	7e-09	692144	NTRK2
rs4671457	non_coding_transcript_exon_variant	2:63119221-63119221	T/C	0.4166	0.0101	0.0018	7.4e-09	684558	WDPCP
rs139531	intron_variant	22:41280172-41280172	A/G	0.7197	0.0112	0.0019	9.5e-09	690810	EP300
rs1659400	intron_variant	9:84711079-84711079	A/G	0.4573	-0.0099	0.0017	1e-08	691232	NTRK2
rs997229	intron_variant	6:100588837-100588837	T/C	0.5489	0.0099	0.0017	1e-08	689120	SIM1
rs1659401	intron_variant	9:84709768-84709768	T/C	0.5425	0.0098	0.0017	1.1e-08	691214	NTRK2
rs1659401	regulatory_region_variant	9:84709768-84709768	T/C	0.5425	0.0098	0.0017	1.1e-08	691214	NTRK2
rs1778931	intron_variant	9:84708860-84708860	A/G	0.4573	-0.0098	0.0017	1.1e-08	691239	NTRK2
rs240769	intron_variant	6:100564311-100564311	A/C	0.4155	-0.01	0.0018	1.1e-08	682964	SIM1
rs1006398	intron_variant	6:100589842-100589842	A/T	0.4594	-0.0098	0.0017	1.3e-08	688785	SIM1
rs2265	intron_variant	9:84716691-84716691	T/C	0.5425	0.0098	0.0017	1.3e-08	691089	NTRK2
rs240148	intron_variant	6:100628891-100628891	T/C	0.5506	-0.0098	0.0017	1.4e-08	686998	SIM1
rs3790116	intron_variant	16:56354132-56354132	T/C	0.1327	0.0139	0.0024	1.4e-08	791603	BBS2
rs3790116	intron_variant,NMD_transcript_variant	16:56354132-56354132	T/C	0.1327	0.0139	0.0024	1.4e-08	791603	BBS2
rs3790116	intron_variant,non_coding_transcript_variant	16:56354132-56354132	T/C	0.1327	0.0139	0.0024	1.4e-08	791603	BBS2
rs2162014	non_coding_transcript_exon_variant	2:63118372-63118372	A/C	0.4158	0.0099	0.0018	1.5e-08	683144	WDPCP
rs240766	intergenic_variant	6:100506160-100506160	A/G	0.5475	0.0098	0.0017	1.5e-08	686166	SIM1
rs139477	intron_variant	22:41228457-41228457	A/G	0.7197	0.011	0.0019	1.6e-08	678857	EP300
rs139477	intron_variant,NMD_transcript_variant	22:41228457-41228457	A/G	0.7197	0.011	0.0019	1.6e-08	678857	EP300
rs139477	intron_variant,non_coding_transcript_variant	22:41228457-41228457	A/G	0.7197	0.011	0.0019	1.6e-08	678857	EP300
rs240153	intron_variant	6:100619259-100619259	A/C	0.4493	0.0097	0.0017	1.8e-08	687461	SIM1
rs240776	intron_variant	6:100572577-100572577	T/C	0.4574	-0.0097	0.0017	1.8e-08	689085	SIM1
rs2489162	intron_variant	9:84718827-84718827	A/G	0.5424	0.0097	0.0017	1.8e-08	690829	NTRK2
rs1439048	intron_variant	9:84712974-84712974	T/G	0.4577	-0.0097	0.0017	1.9e-08	691272	NTRK2
rs1778932	intron_variant	9:84709297-84709297	A/G	0.5427	0.0097	0.0017	1.9e-08	691225	NTRK2
rs9373504	intergenic_variant	6:100493161-100493161	A/G	0.447	-0.0097	0.0017	1.9e-08	689359	SIM1
rs780093	intron_variant	2:27519736-27519736	T/C	0.3941	-0.0093	0.0017	2e-08	794606	IFT172
rs9322076	intergenic_variant	6:100504144-100504144	T/C	0.5531	0.0098	0.0017	2e-08	681399	SIM1
rs1187343	intron_variant	9:84693868-84693868	A/G	0.6221	0.0099	0.0018	2.3e-08	692591	NTRK2
rs2579369	intron_variant	9:84714672-84714672	T/C	0.4583	-0.0096	0.0017	2.3e-08	691159	NTRK2
rs2918626	intron_variant	9:84714068-84714068	T/C	0.4662	-0.0091	0.0016	2.3e-08	794721	NTRK2
rs4820429	intron_variant	22:41142107-41142107	C/G	0.285	-0.0107	0.0019	2.3e-08	691942	EP300
rs1953	3_prime_UTR_variant	22:41245980-41245980	T/C	0.2744	-0.0104	0.0019	2.4e-08	781918	EP300
rs1953	regulatory_region_variant	22:41245980-41245980	T/C	0.2744	-0.0104	0.0019	2.4e-08	781918	EP300
rs2213595	intergenic_variant	6:100487943-100487943	A/G	0.5531	0.0096	0.0017	2.4e-08	690618	SIM1
rs240141	intron_variant	6:100637070-100637070	A/G	0.5506	-0.0097	0.0017	2.4e-08	685804	SIM1
rs7510675	intron_variant	22:41153293-41153293	A/G	0.2851	-0.0107	0.0019	2.4e-08	691932	EP300
rs881301	intergenic_variant	8:38474800-38474800	T/C	0.5818	-0.0097	0.0017	2.4e-08	691753	FGFR1
rs240765	intergenic_variant	6:100506007-100506007	T/C	0.5424	0.0096	0.0017	2.5e-08	684899	SIM1
rs6929748	intergenic_variant	6:100481518-100481518	T/C	0.4469	-0.0096	0.0017	2.5e-08	690840	SIM1
rs780094	intron_variant	2:27518370-27518370	T/C	0.3934	-0.0093	0.0017	2.5e-08	795482	IFT172
rs6901944	intron_variant	6:56998007-56998007	A/G	0.8344	-0.0126	0.0023	2.7e-08	692035	RAB23
rs11644679	intron_variant	16:56456637-56456637	A/G	0.1681	0.0122	0.0022	2.9e-08	790999	BBS2
rs11644679	intron_variant,NMD_transcript_variant	16:56456637-56456637	A/G	0.1681	0.0122	0.0022	2.9e-08	790999	BBS2
rs11644679	intron_variant,non_coding_transcript_variant	16:56456637-56456637	A/G	0.1681	0.0122	0.0022	2.9e-08	790999	BBS2
rs2397974	intergenic_variant	6:100477952-100477952	T/C	0.5536	0.0095	0.0017	3.1e-08	691048	SIM1
rs2071826	intergenic_variant	6:100480481-100480481	A/G	0.5534	0.0095	0.0017	3.3e-08	690746	SIM1
rs3026659	intron_variant	22:38000213-38000213	T/C	0.3649	-0.01	0.0018	3.4e-08	683489	SOX10
rs3026659	regulatory_region_variant	22:38000213-38000213	T/C	0.3649	-0.01	0.0018	3.4e-08	683489	SOX10
rs3818233	intron_variant	6:100638496-100638496	C/G	0.4592	-0.0095	0.0017	3.4e-08	687912	SIM1
rs13220575	intron_variant	6:57002239-57002239	T/C	0.1656	0.0125	0.0023	3.5e-08	691710	RAB23
rs139474	intron_variant	22:41223222-41223222	C/G	0.3784	-0.0098	0.0018	3.5e-08	691051	EP300
rs139474	intron_variant,NMD_transcript_variant	22:41223222-41223222	C/G	0.3784	-0.0098	0.0018	3.5e-08	691051	EP300
rs139474	intron_variant,non_coding_transcript_variant	22:41223222-41223222	C/G	0.3784	-0.0098	0.0018	3.5e-08	691051	EP300
rs7751526	intergenic_variant	6:100501946-100501946	A/G	0.4462	-0.0095	0.0017	3.5e-08	687289	SIM1
rs139492	intron_variant	22:41232898-41232898	T/G	0.3733	-0.0099	0.0018	3.7e-08	687562	EP300
rs7452753	intron_variant	6:100605850-100605850	T/C	0.4584	-0.0095	0.0017	3.9e-08	688456	SIM1
rs5758223	intron_variant	22:41093916-41093916	A/G	0.7147	0.0106	0.0019	4e-08	689935	EP300
rs5758223	regulatory_region_variant	22:41093916-41093916	A/G	0.7147	0.0106	0.0019	4e-08	689935	EP300
rs2281336	intron_variant	22:41239200-41239200	C/G	0.377	-0.0099	0.0018	4.1e-08	684449	EP300
rs9386154	intergenic_variant	6:100475828-100475828	C/G	0.5536	0.0094	0.0017	4.3e-08	691125	SIM1
rs6901854	intergenic_variant	6:100484415-100484415	T/C	0.5427	0.0094	0.0017	4.7e-08	690970	SIM1
rs139485	intron_variant	22:41231602-41231602	A/G	0.3771	-0.0097	0.0018	5.1e-08	692651	EP300
rs8071116	intergenic_variant	17:58042402-58042402	A/T	0.08881	0.0168	0.0031	5.1e-08	663060	MKS1
rs139484	intron_variant	22:41231539-41231539	T/G	0.6234	0.0097	0.0018	5.5e-08	692320	EP300
rs720884	intron_variant	6:57012520-57012520	A/G	0.835	-0.0123	0.0023	5.5e-08	691735	RAB23
rs1187356	intron_variant	9:84690342-84690342	A/T	0.5734	0.0094	0.0017	5.6e-08	691095	NTRK2
rs3721	3_prime_UTR_variant	22:41231069-41231069	T/C	0.3768	-0.0097	0.0018	5.8e-08	691997	EP300
rs3721	3_prime_UTR_variant,NMD_transcript_variant	22:41231069-41231069	T/C	0.3768	-0.0097	0.0018	5.8e-08	691997	EP300
rs3721	intron_variant	22:41231069-41231069	T/C	0.3768	-0.0097	0.0018	5.8e-08	691997	EP300
rs3721	non_coding_transcript_exon_variant	22:41231069-41231069	T/C	0.3768	-0.0097	0.0018	5.8e-08	691997	EP300
rs1569858	intron_variant	22:41145020-41145020	A/G	0.3784	-0.0097	0.0018	5.9e-08	692122	EP300
rs139486	intron_variant	22:41231650-41231650	C/G	0.6244	0.0097	0.0018	6.2e-08	692192	EP300
rs2134044	intron_variant	6:100627478-100627478	A/C	0.4587	-0.0093	0.0017	6.2e-08	688672	SIM1
rs893582	intron_variant	9:84695446-84695446	A/G	0.4266	-0.0093	0.0017	6.8e-08	691145	NTRK2
rs139439	intron_variant	22:41210026-41210026	A/C	0.6206	0.0096	0.0018	6.9e-08	692565	EP300
rs139439	intron_variant,NMD_transcript_variant	22:41210026-41210026	A/C	0.6206	0.0096	0.0018	6.9e-08	692565	EP300
rs139439	intron_variant,non_coding_transcript_variant	22:41210026-41210026	A/C	0.6206	0.0096	0.0018	6.9e-08	692565	EP300
rs2038209	intergenic_variant	22:41198607-41198607	T/C	0.3821	-0.0096	0.0018	6.9e-08	690009	EP300
rs139464	intron_variant	22:41218016-41218016	C/G	0.6208	0.0096	0.0018	7e-08	692537	EP300
rs139464	intron_variant,NMD_transcript_variant	22:41218016-41218016	C/G	0.6208	0.0096	0.0018	7e-08	692537	EP300
rs139464	intron_variant,non_coding_transcript_variant	22:41218016-41218016	C/G	0.6208	0.0096	0.0018	7e-08	692537	EP300
rs139464	non_coding_transcript_exon_variant	22:41218016-41218016	C/G	0.6208	0.0096	0.0018	7e-08	692537	EP300
rs139464	regulatory_region_variant	22:41218016-41218016	C/G	0.6208	0.0096	0.0018	7e-08	692537	EP300
rs2413637	intron_variant	22:41145523-41145523	C/G	0.6221	0.0096	0.0018	7e-08	691972	EP300
rs139460	intron_variant	22:41215059-41215059	T/C	0.6203	0.0096	0.0018	7.1e-08	692509	EP300
rs139460	intron_variant,NMD_transcript_variant	22:41215059-41215059	T/C	0.6203	0.0096	0.0018	7.1e-08	692509	EP300
rs139460	intron_variant,non_coding_transcript_variant	22:41215059-41215059	T/C	0.6203	0.0096	0.0018	7.1e-08	692509	EP300
rs139452	intron_variant	22:41214168-41214168	C/G	0.3792	-0.0096	0.0018	7.2e-08	692554	EP300
rs139452	intron_variant,NMD_transcript_variant	22:41214168-41214168	C/G	0.3792	-0.0096	0.0018	7.2e-08	692554	EP300
rs139452	intron_variant,non_coding_transcript_variant	22:41214168-41214168	C/G	0.3792	-0.0096	0.0018	7.2e-08	692554	EP300
rs139452	non_coding_transcript_exon_variant	22:41214168-41214168	C/G	0.3792	-0.0096	0.0018	7.2e-08	692554	EP300
rs1187341	intron_variant	9:84696800-84696800	T/G	0.5736	0.0094	0.0017	7.3e-08	685057	NTRK2
rs4822011	intron_variant	22:41154950-41154950	T/C	0.6212	0.0096	0.0018	7.3e-08	692115	EP300
rs738631	intron_variant	22:41115172-41115172	A/G	0.6225	0.0096	0.0018	7.3e-08	691775	EP300
rs738631	intron_variant,non_coding_transcript_variant	22:41115172-41115172	A/G	0.6225	0.0096	0.0018	7.3e-08	691775	EP300
rs20552	synonymous_variant	22:41155035-41155035	A/T	0.6211	0.0097	0.0018	7.5e-08	690634	EP300
rs4820431	intron_variant	22:41153917-41153917	A/C	0.377	-0.0096	0.0018	7.5e-08	691789	EP300
rs139432	intron_variant	22:41208553-41208553	A/G	0.3794	-0.0096	0.0018	7.7e-08	692571	EP300
rs139432	intron_variant,NMD_transcript_variant	22:41208553-41208553	A/G	0.3794	-0.0096	0.0018	7.7e-08	692571	EP300
rs139432	intron_variant,non_coding_transcript_variant	22:41208553-41208553	A/G	0.3794	-0.0096	0.0018	7.7e-08	692571	EP300
rs139455	intron_variant	22:41214402-41214402	C/G	0.6205	0.0096	0.0018	7.7e-08	692616	EP300
rs139455	intron_variant,NMD_transcript_variant	22:41214402-41214402	C/G	0.6205	0.0096	0.0018	7.7e-08	692616	EP300
rs139455	intron_variant,non_coding_transcript_variant	22:41214402-41214402	C/G	0.6205	0.0096	0.0018	7.7e-08	692616	EP300
rs139455	non_coding_transcript_exon_variant	22:41214402-41214402	C/G	0.6205	0.0096	0.0018	7.7e-08	692616	EP300
rs139457	intron_variant	22:41214663-41214663	T/C	0.6253	0.0096	0.0018	7.7e-08	692617	EP300
rs139457	intron_variant,NMD_transcript_variant	22:41214663-41214663	T/C	0.6253	0.0096	0.0018	7.7e-08	692617	EP300
rs139457	intron_variant,non_coding_transcript_variant	22:41214663-41214663	T/C	0.6253	0.0096	0.0018	7.7e-08	692617	EP300
rs139457	non_coding_transcript_exon_variant	22:41214663-41214663	T/C	0.6253	0.0096	0.0018	7.7e-08	692617	EP300
rs7773043	intergenic_variant	6:100473239-100473239	A/G	0.5443	0.0092	0.0017	7.7e-08	691960	SIM1
rs85220	intron_variant	22:41216961-41216961	T/G	0.6205	0.0096	0.0018	7.8e-08	692615	EP300
rs85220	intron_variant,NMD_transcript_variant	22:41216961-41216961	T/G	0.6205	0.0096	0.0018	7.8e-08	692615	EP300
rs85220	intron_variant,non_coding_transcript_variant	22:41216961-41216961	T/G	0.6205	0.0096	0.0018	7.8e-08	692615	EP300
rs85220	regulatory_region_variant	22:41216961-41216961	T/G	0.6205	0.0096	0.0018	7.8e-08	692615	EP300
rs4822006	intron_variant	22:41123358-41123358	T/C	0.379	-0.0096	0.0018	7.9e-08	692425	EP300
rs4822006	intron_variant,non_coding_transcript_variant	22:41123358-41123358	T/C	0.379	-0.0096	0.0018	7.9e-08	692425	EP300
rs11657437	intergenic_variant	17:58047618-58047618	A/T	0.1099	0.0151	0.0028	8e-08	663383	MKS1
rs11657437	regulatory_region_variant	17:58047618-58047618	A/T	0.1099	0.0151	0.0028	8e-08	663383	MKS1
rs139450	intron_variant	22:41213855-41213855	T/C	0.6205	0.0096	0.0018	8.1e-08	692599	EP300
rs139450	intron_variant,NMD_transcript_variant	22:41213855-41213855	T/C	0.6205	0.0096	0.0018	8.1e-08	692599	EP300
rs139450	intron_variant,non_coding_transcript_variant	22:41213855-41213855	T/C	0.6205	0.0096	0.0018	8.1e-08	692599	EP300
rs139450	non_coding_transcript_exon_variant	22:41213855-41213855	T/C	0.6205	0.0096	0.0018	8.1e-08	692599	EP300
rs2076577	intron_variant	22:41172476-41172476	T/C	0.3791	-0.0096	0.0018	8.1e-08	692054	EP300
rs2076577	intron_variant,non_coding_transcript_variant	22:41172476-41172476	T/C	0.3791	-0.0096	0.0018	8.1e-08	692054	EP300
rs1033611	intron_variant	22:41162228-41162228	A/G	0.3817	-0.0096	0.0018	8.2e-08	692079	EP300
rs139451	intron_variant	22:41214020-41214020	A/G	0.3799	-0.0096	0.0018	8.2e-08	692599	EP300
rs139451	intron_variant,non_coding_transcript_variant	22:41214020-41214020	A/G	0.3799	-0.0096	0.0018	8.2e-08	692599	EP300
rs139451	non_coding_transcript_exon_variant	22:41214020-41214020	A/G	0.3799	-0.0096	0.0018	8.2e-08	692599	EP300
rs139451	synonymous_variant	22:41214020-41214020	A/G	0.3799	-0.0096	0.0018	8.2e-08	692599	EP300
rs139451	synonymous_variant,NMD_transcript_variant	22:41214020-41214020	A/G	0.3799	-0.0096	0.0018	8.2e-08	692599	EP300
rs139453	intron_variant	22:41214238-41214238	A/G	0.6205	0.0095	0.0018	8.4e-08	691170	EP300
rs139453	intron_variant,NMD_transcript_variant	22:41214238-41214238	A/G	0.6205	0.0095	0.0018	8.4e-08	691170	EP300
rs139453	intron_variant,non_coding_transcript_variant	22:41214238-41214238	A/G	0.6205	0.0095	0.0018	8.4e-08	691170	EP300
rs139453	non_coding_transcript_exon_variant	22:41214238-41214238	A/G	0.6205	0.0095	0.0018	8.4e-08	691170	EP300
rs139454	intron_variant	22:41214387-41214387	A/G	0.3795	-0.0095	0.0018	8.4e-08	692612	EP300
rs139454	intron_variant,NMD_transcript_variant	22:41214387-41214387	A/G	0.3795	-0.0095	0.0018	8.4e-08	692612	EP300
rs139454	intron_variant,non_coding_transcript_variant	22:41214387-41214387	A/G	0.3795	-0.0095	0.0018	8.4e-08	692612	EP300
rs139454	non_coding_transcript_exon_variant	22:41214387-41214387	A/G	0.3795	-0.0095	0.0018	8.4e-08	692612	EP300
rs5758237	intron_variant	22:41119740-41119740	T/G	0.3799	-0.0096	0.0018	8.4e-08	692051	EP300
rs5758237	intron_variant,non_coding_transcript_variant	22:41119740-41119740	T/G	0.3799	-0.0096	0.0018	8.4e-08	692051	EP300
rs5758238	intron_variant	22:41123304-41123304	A/G	0.6207	0.0095	0.0018	8.4e-08	692455	EP300
rs5758238	intron_variant,non_coding_transcript_variant	22:41123304-41123304	A/G	0.6207	0.0095	0.0018	8.4e-08	692455	EP300
rs139433	intron_variant	22:41208648-41208648	C/G	0.6205	0.0095	0.0018	8.5e-08	692564	EP300
rs139433	intron_variant,NMD_transcript_variant	22:41208648-41208648	C/G	0.6205	0.0095	0.0018	8.5e-08	692564	EP300
rs139433	intron_variant,non_coding_transcript_variant	22:41208648-41208648	C/G	0.6205	0.0095	0.0018	8.5e-08	692564	EP300
rs17752670	intron_variant	22:37886890-37886890	T/C	0.2113	-0.0116	0.0022	8.6e-08	679906	SOX10
rs17752670	intron_variant,non_coding_transcript_variant	22:37886890-37886890	T/C	0.2113	-0.0116	0.0022	8.6e-08	679906	SOX10
rs17752670	non_coding_transcript_exon_variant	22:37886890-37886890	T/C	0.2113	-0.0116	0.0022	8.6e-08	679906	SOX10
rs7219913	intergenic_variant	17:58038430-58038430	A/G	0.895	-0.0154	0.0029	8.6e-08	663629	MKS1
rs17685380	intron_variant	6:57010991-57010991	T/G	0.835	-0.0122	0.0023	8.7e-08	687683	RAB23
rs2157342	intergenic_variant	6:100472779-100472779	A/T	0.5448	0.0092	0.0017	8.8e-08	692565	SIM1
rs2157342	regulatory_region_variant	6:100472779-100472779	A/T	0.5448	0.0092	0.0017	8.8e-08	692565	SIM1
rs11687645	intron_variant	2:63335234-63335234	A/T	0.5682	-0.0092	0.0017	8.9e-08	691390	WDPCP
rs11687645	intron_variant,NMD_transcript_variant	2:63335234-63335234	A/T	0.5682	-0.0092	0.0017	8.9e-08	691390	WDPCP
rs139475	intron_variant	22:41227992-41227992	T/C	0.3741	-0.0096	0.0018	9e-08	683891	EP300
rs139475	intron_variant,NMD_transcript_variant	22:41227992-41227992	T/C	0.3741	-0.0096	0.0018	9e-08	683891	EP300
rs139475	intron_variant,non_coding_transcript_variant	22:41227992-41227992	T/C	0.3741	-0.0096	0.0018	9e-08	683891	EP300
rs6910117	intergenic_variant	6:84261961-84261961	A/T	0.9099	-0.0157	0.0029	9.1e-08	643225	MRAP2
rs11653839	intergenic_variant	17:58041633-58041633	A/C	0.1062	0.0155	0.0029	9.3e-08	663828	MKS1
rs13021322	intron_variant	2:63331455-63331455	T/C	0.4318	0.0092	0.0017	9.5e-08	691561	WDPCP
rs13021322	intron_variant,NMD_transcript_variant	2:63331455-63331455	T/C	0.4318	0.0092	0.0017	9.5e-08	691561	WDPCP
rs4822005	intron_variant	22:41118151-41118151	A/G	0.6201	0.0095	0.0018	9.5e-08	692013	EP300
rs4822005	intron_variant,non_coding_transcript_variant	22:41118151-41118151	A/G	0.6201	0.0095	0.0018	9.5e-08	692013	EP300
rs7773661	intergenic_variant	6:100471333-100471333	A/G	0.4573	-0.0091	0.0017	1.2e-07	692598	SIM1
rs10173115	intron_variant	2:63128385-63128385	A/T	0.465	0.0091	0.0017	1.3e-07	684346	WDPCP
rs10173115	intron_variant,NMD_transcript_variant	2:63128385-63128385	A/T	0.465	0.0091	0.0017	1.3e-07	684346	WDPCP
rs10173115	intron_variant,non_coding_transcript_variant	2:63128385-63128385	A/T	0.465	0.0091	0.0017	1.3e-07	684346	WDPCP
rs766314	intron_variant	22:41094676-41094676	C/G	0.6227	0.0094	0.0018	1.3e-07	689227	EP300
rs766314	regulatory_region_variant	22:41094676-41094676	C/G	0.6227	0.0094	0.0018	1.3e-07	689227	EP300
rs139434	intron_variant	22:41208781-41208781	A/G	0.6206	0.0094	0.0018	1.4e-07	691844	EP300
rs139434	intron_variant,NMD_transcript_variant	22:41208781-41208781	A/G	0.6206	0.0094	0.0018	1.4e-07	691844	EP300
rs139434	intron_variant,non_coding_transcript_variant	22:41208781-41208781	A/G	0.6206	0.0094	0.0018	1.4e-07	691844	EP300
rs11691192	intron_variant	2:63333944-63333944	A/C	0.4318	0.0091	0.0017	1.5e-07	685315	WDPCP
rs11691192	intron_variant,NMD_transcript_variant	2:63333944-63333944	A/C	0.4318	0.0091	0.0017	1.5e-07	685315	WDPCP
rs4840132	intergenic_variant	6:100466726-100466726	T/C	0.5415	0.009	0.0017	1.7e-07	691237	SIM1
rs4840132	regulatory_region_variant	6:100466726-100466726	T/C	0.5415	0.009	0.0017	1.7e-07	691237	SIM1
rs9611497	intron_variant	22:41111396-41111396	A/G	0.3788	-0.0094	0.0018	1.7e-07	689536	EP300
rs9611497	intron_variant,non_coding_transcript_variant	22:41111396-41111396	A/G	0.3788	-0.0094	0.0018	1.7e-07	689536	EP300
rs2267424	intron_variant	22:41093522-41093522	A/C	0.6204	0.0093	0.0018	1.9e-07	689225	EP300
rs2267424	regulatory_region_variant	22:41093522-41093522	A/C	0.6204	0.0093	0.0018	1.9e-07	689225	EP300
rs241819	intron_variant	6:100462922-100462922	A/G	0.5413	0.0089	0.0017	2e-07	692550	SIM1
rs241819	non_coding_transcript_exon_variant	6:100462922-100462922	A/G	0.5413	0.0089	0.0017	2e-07	692550	SIM1
rs4822002	intergenic_variant	22:41091340-41091340	A/G	0.6202	0.0093	0.0018	2.1e-07	689141	EP300
rs4822002	regulatory_region_variant	22:41091340-41091340	A/G	0.6202	0.0093	0.0018	2.1e-07	689141	EP300
rs4822004	intron_variant	22:41106821-41106821	T/G	0.3799	-0.0093	0.0018	2.1e-07	689320	EP300
rs4329121	intron_variant	6:100639631-100639631	C/G	0.4671	-0.0089	0.0017	2.6e-07	688114	SIM1
rs13387839	intron_variant	2:63201436-63201436	T/C	0.2853	0.0092	0.0018	2.9e-07	791783	WDPCP
rs13387839	intron_variant,NMD_transcript_variant	2:63201436-63201436	T/C	0.2853	0.0092	0.0018	2.9e-07	791783	WDPCP
rs5758231	intron_variant	22:41108045-41108045	C/G	0.3817	-0.0091	0.0018	3.3e-07	683552	EP300
rs5758231	non_coding_transcript_exon_variant	22:41108045-41108045	C/G	0.3817	-0.0091	0.0018	3.3e-07	683552	EP300
rs12805133	intron_variant	11:66715794-66715794	A/G	0.5426	-0.0091	0.0018	3.5e-07	635477	BBS1
rs12805133	intron_variant,non_coding_transcript_variant	11:66715794-66715794	A/G	0.5426	-0.0091	0.0018	3.5e-07	635477	BBS1
rs139465	intron_variant	22:41218109-41218109	T/C	0.3782	-0.0093	0.0018	3.9e-07	638000	EP300
rs139465	intron_variant,NMD_transcript_variant	22:41218109-41218109	T/C	0.3782	-0.0093	0.0018	3.9e-07	638000	EP300
rs139465	intron_variant,non_coding_transcript_variant	22:41218109-41218109	T/C	0.3782	-0.0093	0.0018	3.9e-07	638000	EP300
rs139465	non_coding_transcript_exon_variant	22:41218109-41218109	T/C	0.3782	-0.0093	0.0018	3.9e-07	638000	EP300
rs139465	regulatory_region_variant	22:41218109-41218109	T/C	0.3782	-0.0093	0.0018	3.9e-07	638000	EP300
rs6026567	intron_variant	20:58869860-58869860	A/G	0.571	-0.0092	0.0018	4.4e-07	659708	GNAS
rs6026567	intron_variant,non_coding_transcript_variant	20:58869860-58869860	A/G	0.571	-0.0092	0.0018	4.4e-07	659708	GNAS
rs6026567	regulatory_region_variant	20:58869860-58869860	A/G	0.571	-0.0092	0.0018	4.4e-07	659708	GNAS
rs12713488	intron_variant	2:63359642-63359642	T/C	0.438	0.0087	0.0017	4.7e-07	691424	WDPCP
rs12713488	intron_variant,NMD_transcript_variant	2:63359642-63359642	T/C	0.438	0.0087	0.0017	4.7e-07	691424	WDPCP
rs2144342	intron_variant	22:41117090-41117090	T/G	0.6201	0.0092	0.0018	4.8e-07	638264	EP300
rs2144342	intron_variant,non_coding_transcript_variant	22:41117090-41117090	T/G	0.6201	0.0092	0.0018	4.8e-07	638264	EP300
rs1996401	intron_variant	2:63346613-63346613	T/G	0.4378	0.0087	0.0017	4.9e-07	691881	WDPCP
rs1996401	intron_variant,NMD_transcript_variant	2:63346613-63346613	T/G	0.4378	0.0087	0.0017	4.9e-07	691881	WDPCP
rs9610560	intron_variant	22:36668331-36668331	A/G	0.7375	-0.0099	0.002	5.1e-07	671468	IFT27
rs17765088	3_prime_UTR_variant	3:45902103-45902103	C/G	0.8817	-0.0136	0.0027	5.7e-07	666309	LZTFL1
rs17765088	intron_variant	3:45902103-45902103	C/G	0.8817	-0.0136	0.0027	5.7e-07	666309	LZTFL1
rs17765088	intron_variant,NMD_transcript_variant	3:45902103-45902103	C/G	0.8817	-0.0136	0.0027	5.7e-07	666309	LZTFL1
rs17765088	intron_variant,non_coding_transcript_variant	3:45902103-45902103	C/G	0.8817	-0.0136	0.0027	5.7e-07	666309	LZTFL1
rs12151606	intron_variant	2:63203040-63203040	T/C	0.6952	-0.0089	0.0018	6.3e-07	792363	WDPCP
rs12151606	intron_variant,NMD_transcript_variant	2:63203040-63203040	T/C	0.6952	-0.0089	0.0018	6.3e-07	792363	WDPCP
rs240150	intron_variant	6:100624431-100624431	A/G	0.5017	-0.0086	0.0017	6.7e-07	685827	SIM1
rs2677436	intron_variant	2:63268800-63268800	A/T	0.2915	0.0093	0.0019	7.1e-07	691776	WDPCP
rs2677436	intron_variant,NMD_transcript_variant	2:63268800-63268800	A/T	0.2915	0.0093	0.0019	7.1e-07	691776	WDPCP
rs9610561	intron_variant	22:36668481-36668481	A/G	0.2623	0.0098	0.002	7.1e-07	689226	IFT27
rs13171414	intron_variant	5:37231977-37231977	A/G	0.7836	0.0103	0.0021	7.2e-07	692376	NIPBL
rs139509	synonymous_variant	22:41256729-41256729	A/G	0.276	-0.01	0.002	7.3e-07	634253	EP300
rs2699388	intron_variant	2:63269002-63269002	A/C	0.7107	-0.0093	0.0019	7.8e-07	691711	WDPCP
rs2699388	intron_variant,NMD_transcript_variant	2:63269002-63269002	A/C	0.7107	-0.0093	0.0019	7.8e-07	691711	WDPCP
rs2284006	intron_variant	22:36673983-36673983	T/C	0.262	0.0098	0.002	7.9e-07	677081	IFT27
rs2284008	intron_variant	22:36677702-36677702	A/G	0.7364	-0.0098	0.002	8.1e-07	671191	IFT27
rs3957366	intergenic_variant	6:57040476-57040476	A/G	0.1495	0.0128	0.0026	8.2e-07	544499	RAB23
rs4560098	intron_variant	2:63295443-63295443	A/G	0.2896	0.0093	0.0019	8.4e-07	692121	WDPCP
rs4560098	intron_variant,NMD_transcript_variant	2:63295443-63295443	A/G	0.2896	0.0093	0.0019	8.4e-07	692121	WDPCP
rs4416201	intron_variant	2:63285702-63285702	A/G	0.2894	0.0093	0.0019	8.5e-07	691994	WDPCP
rs4416201	intron_variant,NMD_transcript_variant	2:63285702-63285702	A/G	0.2894	0.0093	0.0019	8.5e-07	691994	WDPCP
rs6545984	intron_variant	2:63289998-63289998	T/G	0.2894	0.0093	0.0019	8.7e-07	691984	WDPCP
rs6545984	intron_variant,NMD_transcript_variant	2:63289998-63289998	T/G	0.2894	0.0093	0.0019	8.7e-07	691984	WDPCP
rs6705776	intron_variant	2:63294352-63294352	T/C	0.2895	0.0093	0.0019	8.7e-07	692129	WDPCP
rs6705776	intron_variant,NMD_transcript_variant	2:63294352-63294352	T/C	0.2895	0.0093	0.0019	8.7e-07	692129	WDPCP
rs970278	intron_variant	2:63270419-63270419	A/C	0.2879	0.0093	0.0019	8.8e-07	691835	WDPCP
rs970278	intron_variant,NMD_transcript_variant	2:63270419-63270419	A/C	0.2879	0.0093	0.0019	8.8e-07	691835	WDPCP
rs4428008	intron_variant	2:63295380-63295380	T/C	0.7105	-0.0093	0.0019	8.9e-07	692121	WDPCP
rs4428008	intron_variant,NMD_transcript_variant	2:63295380-63295380	T/C	0.7105	-0.0093	0.0019	8.9e-07	692121	WDPCP
rs9607368	intron_variant	22:36667904-36667904	A/G	0.2623	0.0097	0.002	9.1e-07	691241	IFT27
rs10173637	intron_variant	2:63284986-63284986	A/G	0.2879	0.0093	0.0019	9.2e-07	691966	WDPCP
rs10173637	intron_variant,NMD_transcript_variant	2:63284986-63284986	A/G	0.2879	0.0093	0.0019	9.2e-07	691966	WDPCP
rs13184464	intron_variant	5:37191983-37191983	T/C	0.2205	-0.0102	0.0021	9.4e-07	691908	NIPBL
rs13184464	intron_variant,NMD_transcript_variant	5:37191983-37191983	T/C	0.2205	-0.0102	0.0021	9.4e-07	691908	NIPBL
rs2945032	intron_variant	2:63271065-63271065	A/C	0.7107	-0.0092	0.0019	9.4e-07	691923	WDPCP
rs2945032	intron_variant,NMD_transcript_variant	2:63271065-63271065	A/C	0.7107	-0.0092	0.0019	9.4e-07	691923	WDPCP
rs2945032	regulatory_region_variant	2:63271065-63271065	A/C	0.7107	-0.0092	0.0019	9.4e-07	691923	WDPCP
rs12713476	intron_variant	2:63282715-63282715	T/G	0.2894	0.0092	0.0019	9.5e-07	692016	WDPCP
rs12713476	intron_variant,NMD_transcript_variant	2:63282715-63282715	T/G	0.2894	0.0092	0.0019	9.5e-07	692016	WDPCP
rs1607203	intron_variant	2:63267134-63267134	T/C	0.2893	0.0092	0.0019	9.9e-07	691757	WDPCP
rs1607203	intron_variant,NMD_transcript_variant	2:63267134-63267134	T/C	0.2893	0.0092	0.0019	9.9e-07	691757	WDPCP
rs2677439	intron_variant	2:63269863-63269863	A/G	0.2879	0.0092	0.0019	9.9e-07	691843	WDPCP
rs2677439	intron_variant,NMD_transcript_variant	2:63269863-63269863	A/G	0.2879	0.0092	0.0019	9.9e-07	691843	WDPCP
rs4611627	intron_variant	2:63290861-63290861	T/G	0.2905	0.0092	0.0019	9.9e-07	692108	WDPCP
rs4611627	intron_variant,NMD_transcript_variant	2:63290861-63290861	T/G	0.2905	0.0092	0.0019	9.9e-07	692108	WDPCP
rs11125957	intron_variant	2:63291337-63291337	A/G	0.7106	-0.0092	0.0019	1e-06	692118	WDPCP
rs11125957	intron_variant,NMD_transcript_variant	2:63291337-63291337	A/G	0.7106	-0.0092	0.0019	1e-06	692118	WDPCP
rs2421881	intron_variant	2:63285550-63285550	T/C	0.2879	0.0092	0.0019	1e-06	691965	WDPCP
rs2421881	intron_variant,NMD_transcript_variant	2:63285550-63285550	T/C	0.2879	0.0092	0.0019	1e-06	691965	WDPCP
rs2677438	intron_variant	2:63268941-63268941	C/G	0.2893	0.0092	0.0019	1e-06	691592	WDPCP
rs2677438	intron_variant,NMD_transcript_variant	2:63268941-63268941	C/G	0.2893	0.0092	0.0019	1e-06	691592	WDPCP
rs7585664	intron_variant	2:63321581-63321581	T/C	0.713	-0.0093	0.0019	1e-06	689532	WDPCP
rs7585664	intron_variant,NMD_transcript_variant	2:63321581-63321581	T/C	0.713	-0.0093	0.0019	1e-06	689532	WDPCP
rs1044670	3_prime_UTR_variant	6:57027181-57027181	A/G	0.148	0.0119	0.0024	1.1e-06	679842	RAB23
rs11161347	intergenic_variant	15:23702902-23702902	A/G	0.4831	0.0085	0.0018	1.1e-06	672682	MAGEL2
rs13177573	intron_variant	5:37233335-37233335	A/C	0.2207	-0.0102	0.0021	1.1e-06	691417	NIPBL
rs16903531	intron_variant	5:37197058-37197058	A/C	0.7781	0.0101	0.0021	1.1e-06	691134	NIPBL
rs16903531	intron_variant,NMD_transcript_variant	5:37197058-37197058	A/C	0.7781	0.0101	0.0021	1.1e-06	691134	NIPBL
rs7596446	intron_variant	2:63285071-63285071	T/C	0.2879	0.0092	0.0019	1.1e-06	684845	WDPCP
rs7596446	intron_variant,NMD_transcript_variant	2:63285071-63285071	T/C	0.2879	0.0092	0.0019	1.1e-06	684845	WDPCP
rs9610557	intron_variant	22:36663342-36663342	T/G	0.2625	0.0096	0.002	1.1e-06	680774	IFT27
rs1607205	intron_variant	2:63273373-63273373	A/G	0.7107	-0.0091	0.0019	1.2e-06	691504	WDPCP
rs1607205	intron_variant,NMD_transcript_variant	2:63273373-63273373	A/G	0.7107	-0.0091	0.0019	1.2e-06	691504	WDPCP
rs16997155	intron_variant	22:36675487-36675487	T/C	0.7364	-0.0096	0.002	1.2e-06	688000	IFT27
rs10512664	intron_variant	5:37158021-37158021	A/G	0.7765	0.0102	0.0021	1.3e-06	692014	NIPBL
rs10512664	intron_variant,NMD_transcript_variant	5:37158021-37158021	A/G	0.7765	0.0102	0.0021	1.3e-06	692014	NIPBL
rs10512664	intron_variant,non_coding_transcript_variant	5:37158021-37158021	A/G	0.7765	0.0102	0.0021	1.3e-06	692014	NIPBL
rs13311608	intron_variant	7:32959989-32959989	A/G	0.5147	-0.0083	0.0017	1.3e-06	688219	BBS9
rs13311608	intron_variant,non_coding_transcript_variant	7:32959989-32959989	A/G	0.5147	-0.0083	0.0017	1.3e-06	688219	BBS9
rs893584	intron_variant	9:84676077-84676077	A/G	0.4196	-0.0084	0.0017	1.4e-06	687583	NTRK2
rs618838	missense_variant	11:66561248-66561248	T/C	0.4526	0.0085	0.0018	1.5e-06	643219	BBS1
rs12628295	intron_variant	22:36666483-36666483	C/G	0.2589	0.0094	0.002	1.6e-06	691369	IFT27
rs12658479	intron_variant	5:37206519-37206519	T/C	0.7796	0.0101	0.0021	1.6e-06	691990	NIPBL
rs12658479	intron_variant,NMD_transcript_variant	5:37206519-37206519	T/C	0.7796	0.0101	0.0021	1.6e-06	691990	NIPBL
rs16997141	intron_variant	22:36666894-36666894	C/G	0.2622	0.0094	0.002	1.6e-06	691464	IFT27
rs752579	intron_variant	17:17757033-17757033	T/C	0.6077	0.0082	0.0017	1.6e-06	781905	RAI1
rs12628386	intron_variant	22:36666772-36666772	T/C	0.7389	-0.0094	0.002	1.7e-06	691501	IFT27
rs9607365	intron_variant	22:36665168-36665168	A/C	0.2626	0.0094	0.002	1.7e-06	691952	IFT27
rs9632396	intron_variant	5:37140229-37140229	T/C	0.2188	-0.0101	0.0021	1.7e-06	692600	NIPBL
rs9632396	intron_variant,NMD_transcript_variant	5:37140229-37140229	T/C	0.2188	-0.0101	0.0021	1.7e-06	692600	NIPBL
rs9632396	intron_variant,non_coding_transcript_variant	5:37140229-37140229	T/C	0.2188	-0.0101	0.0021	1.7e-06	692600	NIPBL
rs9632396	non_coding_transcript_exon_variant	5:37140229-37140229	T/C	0.2188	-0.0101	0.0021	1.7e-06	692600	NIPBL
rs12628674	intron_variant	22:36666969-36666969	T/C	0.7349	-0.0094	0.002	1.8e-06	690066	IFT27
rs1411578	3_prime_UTR_variant	6:57190045-57190045	C/G	0.8428	-0.0111	0.0023	1.8e-06	690046	RAB23
rs1778933	intron_variant	9:84709496-84709496	T/C	0.6714	0.0088	0.0018	1.8e-06	691087	NTRK2
rs1778933	regulatory_region_variant	9:84709496-84709496	T/C	0.6714	0.0088	0.0018	1.8e-06	691087	NTRK2
rs4925108	intron_variant	17:17746109-17746109	T/C	0.5995	0.0081	0.0017	1.8e-06	781581	RAI1
rs6936560	intergenic_variant	6:57031803-57031803	A/T	0.8466	-0.0117	0.0024	1.8e-06	681946	RAB23
rs12713478	intron_variant	2:63299201-63299201	T/C	0.6969	-0.0089	0.0019	1.9e-06	692388	WDPCP
rs12713478	intron_variant,NMD_transcript_variant	2:63299201-63299201	T/C	0.6969	-0.0089	0.0019	1.9e-06	692388	WDPCP
rs9607367	intron_variant	22:36665649-36665649	A/C	0.2626	0.0094	0.002	1.9e-06	691767	IFT27
rs11691718	intron_variant	2:63297479-63297479	A/G	0.697	-0.0089	0.0019	2e-06	691905	WDPCP
rs11691718	intron_variant,NMD_transcript_variant	2:63297479-63297479	A/G	0.697	-0.0089	0.0019	2e-06	691905	WDPCP
rs12994711	intron_variant	2:63301100-63301100	A/G	0.697	-0.0089	0.0019	2e-06	692427	WDPCP
rs12994711	intron_variant,NMD_transcript_variant	2:63301100-63301100	A/G	0.697	-0.0089	0.0019	2e-06	692427	WDPCP
rs12994711	regulatory_region_variant	2:63301100-63301100	A/G	0.697	-0.0089	0.0019	2e-06	692427	WDPCP
rs17619360	intron_variant	6:57131668-57131668	A/C	0.1435	0.0122	0.0026	2e-06	682076	RAB23
rs17619360	intron_variant,NMD_transcript_variant	6:57131668-57131668	A/C	0.1435	0.0122	0.0026	2e-06	682076	RAB23
rs17619360	intron_variant,non_coding_transcript_variant	6:57131668-57131668	A/C	0.1435	0.0122	0.0026	2e-06	682076	RAB23
rs2030188	intron_variant	2:63282178-63282178	C/G	0.6969	-0.0089	0.0019	2e-06	692288	WDPCP
rs2030188	intron_variant,NMD_transcript_variant	2:63282178-63282178	C/G	0.6969	-0.0089	0.0019	2e-06	692288	WDPCP
rs6708847	intron_variant	2:63300446-63300446	T/C	0.3031	0.0089	0.0019	2e-06	692421	WDPCP
rs6708847	intron_variant,NMD_transcript_variant	2:63300446-63300446	T/C	0.3031	0.0089	0.0019	2e-06	692421	WDPCP
rs6709115	intron_variant	2:63300724-63300724	T/C	0.3044	0.0089	0.0019	2e-06	692397	WDPCP
rs6709115	intron_variant,NMD_transcript_variant	2:63300724-63300724	T/C	0.3044	0.0089	0.0019	2e-06	692397	WDPCP
rs4671476	intron_variant	2:63297504-63297504	T/C	0.303	0.0089	0.0019	2.1e-06	692408	WDPCP
rs4671476	intron_variant,NMD_transcript_variant	2:63297504-63297504	T/C	0.303	0.0089	0.0019	2.1e-06	692408	WDPCP
rs7591562	intron_variant	2:63297967-63297967	A/G	0.697	-0.0089	0.0019	2.1e-06	692395	WDPCP
rs7591562	intron_variant,NMD_transcript_variant	2:63297967-63297967	A/G	0.697	-0.0089	0.0019	2.1e-06	692395	WDPCP
rs9610558	intron_variant	22:36665705-36665705	A/G	0.3136	0.0089	0.0019	2.1e-06	691722	IFT27
rs1400688	intron_variant	2:63311401-63311401	T/C	0.697	-0.0088	0.0019	2.2e-06	692319	WDPCP
rs1400688	intron_variant,NMD_transcript_variant	2:63311401-63311401	T/C	0.697	-0.0088	0.0019	2.2e-06	692319	WDPCP
rs1517404	intron_variant	2:63310422-63310422	A/T	0.697	-0.0088	0.0019	2.2e-06	692254	WDPCP
rs1517404	intron_variant,NMD_transcript_variant	2:63310422-63310422	A/T	0.697	-0.0088	0.0019	2.2e-06	692254	WDPCP
rs2284002	intron_variant	22:36664605-36664605	C/G	0.3134	0.0088	0.0019	2.2e-06	692478	IFT27
rs1500004	intergenic_variant	3:46109445-46109445	A/G	0.1037	0.0143	0.003	2.3e-06	651103	LZTFL1
rs1500004	regulatory_region_variant	3:46109445-46109445	A/G	0.1037	0.0143	0.003	2.3e-06	651103	LZTFL1
rs535211	intron_variant	11:66633009-66633009	T/C	0.5175	0.0084	0.0018	2.3e-06	637868	BBS1
rs535211	intron_variant,NMD_transcript_variant	11:66633009-66633009	T/C	0.5175	0.0084	0.0018	2.3e-06	637868	BBS1
rs535211	intron_variant,non_coding_transcript_variant	11:66633009-66633009	T/C	0.5175	0.0084	0.0018	2.3e-06	637868	BBS1
rs6545989	intron_variant	2:63318132-63318132	A/G	0.6969	-0.0089	0.0019	2.3e-06	692350	WDPCP
rs6545989	intron_variant,NMD_transcript_variant	2:63318132-63318132	A/G	0.6969	-0.0089	0.0019	2.3e-06	692350	WDPCP
rs7599736	intron_variant	2:63321721-63321721	T/C	0.303	0.0088	0.0019	2.3e-06	692305	WDPCP
rs7599736	intron_variant,NMD_transcript_variant	2:63321721-63321721	T/C	0.303	0.0088	0.0019	2.3e-06	692305	WDPCP
rs11675647	intron_variant	2:63301302-63301302	C/G	0.6969	-0.0088	0.0019	2.4e-06	692387	WDPCP
rs11675647	intron_variant,NMD_transcript_variant	2:63301302-63301302	C/G	0.6969	-0.0088	0.0019	2.4e-06	692387	WDPCP
rs11675647	regulatory_region_variant	2:63301302-63301302	C/G	0.6969	-0.0088	0.0019	2.4e-06	692387	WDPCP
rs11684108	intron_variant	2:63287152-63287152	C/G	0.6971	-0.0088	0.0019	2.4e-06	692402	WDPCP
rs11684108	intron_variant,NMD_transcript_variant	2:63287152-63287152	C/G	0.6971	-0.0088	0.0019	2.4e-06	692402	WDPCP
rs12713477	intron_variant	2:63287487-63287487	T/C	0.3029	0.0088	0.0019	2.4e-06	692402	WDPCP
rs12713477	intron_variant,NMD_transcript_variant	2:63287487-63287487	T/C	0.3029	0.0088	0.0019	2.4e-06	692402	WDPCP
rs1400687	intron_variant	2:63311631-63311631	A/C	0.3031	0.0088	0.0019	2.4e-06	692299	WDPCP
rs1400687	intron_variant,NMD_transcript_variant	2:63311631-63311631	A/C	0.3031	0.0088	0.0019	2.4e-06	692299	WDPCP
rs2284001	intron_variant	22:36664307-36664307	T/C	0.6864	-0.0088	0.0019	2.4e-06	692247	IFT27
rs4671480	intron_variant	2:63320353-63320353	T/G	0.3031	0.0088	0.0019	2.4e-06	692342	WDPCP
rs4671480	intron_variant,NMD_transcript_variant	2:63320353-63320353	T/G	0.3031	0.0088	0.0019	2.4e-06	692342	WDPCP
rs6545986	intron_variant	2:63297982-63297982	A/G	0.303	0.0088	0.0019	2.4e-06	692346	WDPCP
rs6545986	intron_variant,NMD_transcript_variant	2:63297982-63297982	A/G	0.303	0.0088	0.0019	2.4e-06	692346	WDPCP
rs10169292	intron_variant	2:63326100-63326100	T/G	0.6967	-0.0088	0.0019	2.5e-06	692235	WDPCP
rs10169292	intron_variant,NMD_transcript_variant	2:63326100-63326100	T/G	0.6967	-0.0088	0.0019	2.5e-06	692235	WDPCP
rs10207356	intron_variant	2:63284880-63284880	T/C	0.3014	0.0088	0.0019	2.5e-06	692251	WDPCP
rs10207356	intron_variant,NMD_transcript_variant	2:63284880-63284880	T/C	0.3014	0.0088	0.0019	2.5e-06	692251	WDPCP
rs1400686	intron_variant	2:63315372-63315372	A/G	0.6969	-0.0088	0.0019	2.5e-06	692332	WDPCP
rs1400686	intron_variant,NMD_transcript_variant	2:63315372-63315372	A/G	0.6969	-0.0088	0.0019	2.5e-06	692332	WDPCP
rs4671471	intron_variant	2:63286789-63286789	T/C	0.6971	-0.0088	0.0019	2.5e-06	692385	WDPCP
rs4671471	intron_variant,NMD_transcript_variant	2:63286789-63286789	T/C	0.6971	-0.0088	0.0019	2.5e-06	692385	WDPCP
rs4671473	intron_variant	2:63288799-63288799	T/C	0.6956	-0.0088	0.0019	2.5e-06	692393	WDPCP
rs4671473	intron_variant,NMD_transcript_variant	2:63288799-63288799	T/C	0.6956	-0.0088	0.0019	2.5e-06	692393	WDPCP
rs4671484	intron_variant	2:63327605-63327605	T/C	0.3031	0.0088	0.0019	2.5e-06	692114	WDPCP
rs4671484	intron_variant,NMD_transcript_variant	2:63327605-63327605	T/C	0.3031	0.0088	0.0019	2.5e-06	692114	WDPCP
rs6713500	intron_variant	2:63301896-63301896	T/G	0.3031	0.0088	0.0019	2.5e-06	692402	WDPCP
rs6713500	intron_variant,NMD_transcript_variant	2:63301896-63301896	T/G	0.3031	0.0088	0.0019	2.5e-06	692402	WDPCP
rs6724044	intron_variant	2:63288620-63288620	T/C	0.697	-0.0088	0.0019	2.5e-06	692320	WDPCP
rs6724044	intron_variant,NMD_transcript_variant	2:63288620-63288620	T/C	0.697	-0.0088	0.0019	2.5e-06	692320	WDPCP
rs4671470	intron_variant	2:63286778-63286778	A/G	0.6971	-0.0088	0.0019	2.6e-06	692384	WDPCP
rs4671470	intron_variant,NMD_transcript_variant	2:63286778-63286778	A/G	0.6971	-0.0088	0.0019	2.6e-06	692384	WDPCP
rs6545991	intron_variant	2:63321928-63321928	A/G	0.3031	0.0088	0.0019	2.6e-06	692330	WDPCP
rs6545991	intron_variant,NMD_transcript_variant	2:63321928-63321928	A/G	0.3031	0.0088	0.0019	2.6e-06	692330	WDPCP
rs6706180	intron_variant	2:63303666-63303666	A/G	0.697	-0.0088	0.0019	2.6e-06	692308	WDPCP
rs6706180	intron_variant,NMD_transcript_variant	2:63303666-63303666	A/G	0.697	-0.0088	0.0019	2.6e-06	692308	WDPCP
rs6725694	intron_variant	2:63283767-63283767	C/G	0.6971	-0.0088	0.0019	2.6e-06	692291	WDPCP
rs6725694	intron_variant,NMD_transcript_variant	2:63283767-63283767	C/G	0.6971	-0.0088	0.0019	2.6e-06	692291	WDPCP
rs7558922	intron_variant	2:63321557-63321557	A/G	0.3031	0.0088	0.0019	2.6e-06	692336	WDPCP
rs7558922	intron_variant,NMD_transcript_variant	2:63321557-63321557	A/G	0.3031	0.0088	0.0019	2.6e-06	692336	WDPCP
rs7559137	intron_variant	2:63321733-63321733	A/C	0.3031	0.0088	0.0019	2.6e-06	692336	WDPCP
rs7559137	intron_variant,NMD_transcript_variant	2:63321733-63321733	A/C	0.3031	0.0088	0.0019	2.6e-06	692336	WDPCP
rs1517405	intron_variant	2:63288433-63288433	T/C	0.6971	-0.0087	0.0019	2.7e-06	692326	WDPCP
rs1517405	intron_variant,NMD_transcript_variant	2:63288433-63288433	T/C	0.6971	-0.0087	0.0019	2.7e-06	692326	WDPCP
rs6744720	intron_variant	2:63293898-63293898	T/G	0.697	-0.0087	0.0019	2.7e-06	692376	WDPCP
rs6744720	intron_variant,NMD_transcript_variant	2:63293898-63293898	T/G	0.697	-0.0087	0.0019	2.7e-06	692376	WDPCP
rs12713486	intron_variant	2:63330674-63330674	T/C	0.5461	-0.008	0.0017	2.8e-06	691835	WDPCP
rs12713486	intron_variant,NMD_transcript_variant	2:63330674-63330674	T/C	0.5461	-0.008	0.0017	2.8e-06	691835	WDPCP
rs4671481	intron_variant	2:63320392-63320392	A/G	0.3031	0.0087	0.0019	2.8e-06	692319	WDPCP
rs4671481	intron_variant,NMD_transcript_variant	2:63320392-63320392	A/G	0.3031	0.0087	0.0019	2.8e-06	692319	WDPCP
rs540874	missense_variant	11:66562261-66562261	A/G	0.4452	0.0081	0.0017	2.8e-06	692477	BBS1
rs6708627	intron_variant	2:63316791-63316791	A/G	0.3031	0.0087	0.0019	2.8e-06	692350	WDPCP
rs6708627	intron_variant,NMD_transcript_variant	2:63316791-63316791	A/G	0.3031	0.0087	0.0019	2.8e-06	692350	WDPCP
rs1671064	missense_variant	11:66560202-66560202	A/G	0.5547	-0.0081	0.0017	2.9e-06	692553	BBS1
rs1671064	non_coding_transcript_exon_variant	11:66560202-66560202	A/G	0.5547	-0.0081	0.0017	2.9e-06	692553	BBS1
rs1671064	regulatory_region_variant	11:66560202-66560202	A/G	0.5547	-0.0081	0.0017	2.9e-06	692553	BBS1
rs4671474	intron_variant	2:63288969-63288969	A/C	0.6971	-0.0087	0.0019	2.9e-06	692344	WDPCP
rs4671474	intron_variant,NMD_transcript_variant	2:63288969-63288969	A/C	0.6971	-0.0087	0.0019	2.9e-06	692344	WDPCP
rs6734468	intron_variant	2:63303434-63303434	A/C	0.303	0.0087	0.0019	2.9e-06	690897	WDPCP
rs6734468	intron_variant,NMD_transcript_variant	2:63303434-63303434	A/C	0.303	0.0087	0.0019	2.9e-06	690897	WDPCP
rs1517401	intron_variant	2:63313572-63313572	A/G	0.3032	0.0087	0.0019	3e-06	692317	WDPCP
rs1517401	intron_variant,NMD_transcript_variant	2:63313572-63313572	A/G	0.3032	0.0087	0.0019	3e-06	692317	WDPCP
rs2421882	intron_variant	2:63329714-63329714	T/G	0.5461	-0.008	0.0017	3e-06	691685	WDPCP
rs2421882	intron_variant,NMD_transcript_variant	2:63329714-63329714	T/G	0.5461	-0.008	0.0017	3e-06	691685	WDPCP
rs2421885	intron_variant	2:63349906-63349906	A/G	0.5464	-0.008	0.0017	3.1e-06	692401	WDPCP
rs2421885	intron_variant,NMD_transcript_variant	2:63349906-63349906	A/G	0.5464	-0.008	0.0017	3.1e-06	692401	WDPCP
rs2421886	intron_variant	2:63352177-63352177	T/C	0.3033	0.0087	0.0019	3.1e-06	691979	WDPCP
rs2421886	intron_variant,NMD_transcript_variant	2:63352177-63352177	T/C	0.3033	0.0087	0.0019	3.1e-06	691979	WDPCP
rs2176417	intron_variant	2:63351459-63351459	C/G	0.6952	-0.0087	0.0019	3.2e-06	691791	WDPCP
rs2176417	intron_variant,NMD_transcript_variant	2:63351459-63351459	C/G	0.6952	-0.0087	0.0019	3.2e-06	691791	WDPCP
rs678397	intron_variant	11:66557112-66557112	T/C	0.4581	0.0081	0.0017	3.2e-06	686722	BBS1
rs7561802	intron_variant	2:63334931-63334931	T/C	0.6969	-0.0087	0.0019	3.2e-06	691535	WDPCP
rs7561802	intron_variant,NMD_transcript_variant	2:63334931-63334931	T/C	0.6969	-0.0087	0.0019	3.2e-06	691535	WDPCP
rs11691357	intron_variant	2:63334314-63334314	A/G	0.3031	0.0087	0.0019	3.3e-06	691868	WDPCP
rs11691357	intron_variant,NMD_transcript_variant	2:63334314-63334314	A/G	0.3031	0.0087	0.0019	3.3e-06	691868	WDPCP
rs509556	intron_variant	11:66558891-66558891	A/G	0.4552	0.008	0.0017	3.3e-06	692437	BBS1
rs509556	non_coding_transcript_exon_variant	11:66558891-66558891	A/G	0.4552	0.008	0.0017	3.3e-06	692437	BBS1
rs677488	intron_variant	11:66557291-66557291	T/C	0.5445	-0.008	0.0017	3.3e-06	692582	BBS1
rs11686044	intron_variant	2:63334197-63334197	T/G	0.3031	0.0087	0.0019	3.4e-06	691917	WDPCP
rs11686044	intron_variant,NMD_transcript_variant	2:63334197-63334197	T/G	0.3031	0.0087	0.0019	3.4e-06	691917	WDPCP
rs2176416	intron_variant	2:63363120-63363120	A/G	0.3031	0.0087	0.0019	3.4e-06	691596	WDPCP
rs2176416	intron_variant,NMD_transcript_variant	2:63363120-63363120	A/G	0.3031	0.0087	0.0019	3.4e-06	691596	WDPCP
rs2176416	intron_variant,non_coding_transcript_variant	2:63363120-63363120	A/G	0.3031	0.0087	0.0019	3.4e-06	691596	WDPCP
rs2699389	intron_variant	2:63267796-63267796	A/G	0.2893	0.0095	0.002	3.4e-06	535537	WDPCP
rs2699389	intron_variant,NMD_transcript_variant	2:63267796-63267796	A/G	0.2893	0.0095	0.002	3.4e-06	535537	WDPCP
rs6545997	intron_variant	2:63335011-63335011	A/C	0.3067	0.0087	0.0019	3.4e-06	691913	WDPCP
rs6545997	intron_variant,NMD_transcript_variant	2:63335011-63335011	A/C	0.3067	0.0087	0.0019	3.4e-06	691913	WDPCP
rs6717060	intron_variant	2:63341473-63341473	A/G	0.6953	-0.0087	0.0019	3.4e-06	691731	WDPCP
rs6717060	intron_variant,NMD_transcript_variant	2:63341473-63341473	A/G	0.6953	-0.0087	0.0019	3.4e-06	691731	WDPCP
rs1878507	intron_variant	2:63346276-63346276	T/C	0.5465	-0.008	0.0017	3.5e-06	691640	WDPCP
rs1878507	intron_variant,NMD_transcript_variant	2:63346276-63346276	T/C	0.5465	-0.008	0.0017	3.5e-06	691640	WDPCP
rs11398	3_prime_UTR_variant	6:57189149-57189149	T/C	0.8428	-0.0109	0.0023	3.6e-06	677725	RAB23
rs1517409	intron_variant	2:63347947-63347947	A/G	0.3037	0.0086	0.0019	3.6e-06	691907	WDPCP
rs1517409	intron_variant,NMD_transcript_variant	2:63347947-63347947	A/G	0.3037	0.0086	0.0019	3.6e-06	691907	WDPCP
rs6718198	intron_variant	2:63356994-63356994	T/C	0.5465	-0.008	0.0017	3.6e-06	692022	WDPCP
rs6718198	intron_variant,NMD_transcript_variant	2:63356994-63356994	T/C	0.5465	-0.008	0.0017	3.6e-06	692022	WDPCP
rs12988024	intron_variant	2:63358169-63358169	A/C	0.5464	-0.0079	0.0017	3.8e-06	692022	WDPCP
rs12988024	intron_variant,NMD_transcript_variant	2:63358169-63358169	A/C	0.5464	-0.0079	0.0017	3.8e-06	692022	WDPCP
rs6545988	intron_variant	2:63315597-63315597	A/C	0.3083	0.0087	0.0019	3.9e-06	685240	WDPCP
rs6545988	intron_variant,NMD_transcript_variant	2:63315597-63315597	A/C	0.3083	0.0087	0.0019	3.9e-06	685240	WDPCP
rs572846	non_coding_transcript_exon_variant	11:66563987-66563987	A/G	0.4557	0.0079	0.0017	4e-06	691609	BBS1
rs572846	synonymous_variant	11:66563987-66563987	A/G	0.4557	0.0079	0.0017	4e-06	691609	BBS1
rs941444	intron_variant	17:17790577-17790577	C/G	0.3887	-0.0083	0.0018	4e-06	691985	RAI1
rs4930387	intergenic_variant	11:66682434-66682434	A/G	0.4793	-0.0079	0.0017	4.1e-06	690312	BBS1
rs2699390	intron_variant	2:63267713-63267713	T/C	0.7107	-0.0094	0.002	4.2e-06	528576	WDPCP
rs2699390	intron_variant,NMD_transcript_variant	2:63267713-63267713	T/C	0.7107	-0.0094	0.002	4.2e-06	528576	WDPCP
rs11125967	intron_variant	2:63357657-63357657	A/G	0.3032	0.0086	0.0019	4.4e-06	691589	WDPCP
rs11125967	intron_variant,NMD_transcript_variant	2:63357657-63357657	A/G	0.3032	0.0086	0.0019	4.4e-06	691589	WDPCP
rs2699391	intron_variant	2:63266972-63266972	T/C	0.2878	0.0094	0.002	4.4e-06	528501	WDPCP
rs2699391	intron_variant,NMD_transcript_variant	2:63266972-63266972	T/C	0.2878	0.0094	0.002	4.4e-06	528501	WDPCP
rs10209822	intron_variant	2:63345312-63345312	T/G	0.3032	0.0086	0.0019	4.6e-06	691813	WDPCP
rs10209822	intron_variant,NMD_transcript_variant	2:63345312-63345312	T/G	0.3032	0.0086	0.0019	4.6e-06	691813	WDPCP
rs2176418	intron_variant	2:63348657-63348657	T/C	0.3033	0.0085	0.0019	4.6e-06	691866	WDPCP
rs2176418	intron_variant,NMD_transcript_variant	2:63348657-63348657	T/C	0.3033	0.0085	0.0019	4.6e-06	691866	WDPCP
rs10484410	intron_variant	6:57131890-57131890	T/C	0.8567	-0.0112	0.0024	4.9e-06	692308	RAB23
rs10484410	intron_variant,NMD_transcript_variant	6:57131890-57131890	T/C	0.8567	-0.0112	0.0024	4.9e-06	692308	RAB23
rs10484410	intron_variant,non_coding_transcript_variant	6:57131890-57131890	T/C	0.8567	-0.0112	0.0024	4.9e-06	692308	RAB23
rs2090479	intron_variant	2:63302726-63302726	T/G	0.3031	0.0085	0.0019	4.9e-06	692428	WDPCP
rs2090479	intron_variant,NMD_transcript_variant	2:63302726-63302726	T/G	0.3031	0.0085	0.0019	4.9e-06	692428	WDPCP
rs1791684	intron_variant	11:66601740-66601740	T/G	0.4857	-0.0086	0.0019	5.1e-06	521966	BBS1
rs1791684	intron_variant,NMD_transcript_variant	11:66601740-66601740	T/G	0.4857	-0.0086	0.0019	5.1e-06	521966	BBS1
rs1791684	intron_variant,non_coding_transcript_variant	11:66601740-66601740	T/G	0.4857	-0.0086	0.0019	5.1e-06	521966	BBS1
rs560556	intergenic_variant	11:66570647-66570647	A/G	0.4545	0.0079	0.0017	5.1e-06	690972	BBS1
rs7756421	3_prime_UTR_variant	6:57169211-57169211	A/G	0.8553	-0.0111	0.0024	5.2e-06	692235	RAB23
rs7756421	intron_variant,non_coding_transcript_variant	6:57169211-57169211	A/G	0.8553	-0.0111	0.0024	5.2e-06	692235	RAB23
rs908622	intron_variant	2:63352550-63352550	T/C	0.3049	0.0085	0.0019	5.2e-06	691686	WDPCP
rs908622	intron_variant,NMD_transcript_variant	2:63352550-63352550	T/C	0.3049	0.0085	0.0019	5.2e-06	691686	WDPCP
rs10003827	intergenic_variant	4:122809698-122809698	T/C	0.8758	-0.0124	0.0027	5.3e-06	688004	BBS12
rs4671479	intron_variant	2:63318463-63318463	A/T	0.3031	0.0091	0.002	5.3e-06	536243	WDPCP
rs4671479	intron_variant,NMD_transcript_variant	2:63318463-63318463	A/T	0.3031	0.0091	0.002	5.3e-06	536243	WDPCP
rs6459178	intron_variant	6:57089720-57089720	A/C	0.8551	-0.0115	0.0025	5.5e-06	637559	RAB23
rs6459178	regulatory_region_variant	6:57089720-57089720	A/C	0.8551	-0.0115	0.0025	5.5e-06	637559	RAB23
rs3888741	intron_variant	22:36670410-36670410	T/G	0.3006	0.0086	0.0019	5.9e-06	669352	IFT27
rs6519030	intron_variant	22:36663306-36663306	T/C	0.6859	-0.0085	0.0019	5.9e-06	691578	IFT27
rs4671488	intron_variant	2:63340379-63340379	T/C	0.6928	-0.0091	0.002	6e-06	527753	WDPCP
rs4671488	intron_variant,NMD_transcript_variant	2:63340379-63340379	T/C	0.6928	-0.0091	0.002	6e-06	527753	WDPCP
rs5758211	intergenic_variant	22:41070225-41070225	T/C	0.7816	0.0095	0.0021	6.1e-06	691991	EP300
rs3891400	intergenic_variant	4:122815194-122815194	T/G	0.8777	-0.0123	0.0027	6.4e-06	688812	BBS12
rs9386193	intron_variant	6:100595922-100595922	A/G	0.5841	0.0079	0.0017	6.5e-06	687545	SIM1
rs4578846	intron_variant	2:63327724-63327724	T/C	0.3031	0.0091	0.002	6.7e-06	528796	WDPCP
rs4578846	intron_variant,NMD_transcript_variant	2:63327724-63327724	T/C	0.3031	0.0091	0.002	6.7e-06	528796	WDPCP
rs1212171	intergenic_variant	9:84667612-84667612	T/C	0.5689	0.0078	0.0017	6.9e-06	690796	NTRK2
rs1187353	intron_variant	9:84678338-84678338	A/G	0.4323	-0.0078	0.0017	7.2e-06	687118	NTRK2
rs1659414	non_coding_transcript_exon_variant	9:84655656-84655656	T/C	0.4324	-0.0078	0.0017	7.5e-06	690284	NTRK2
rs4313961	intron_variant	2:63327714-63327714	T/C	0.6956	-0.0091	0.002	7.6e-06	525103	WDPCP
rs4313961	intron_variant,NMD_transcript_variant	2:63327714-63327714	T/C	0.6956	-0.0091	0.002	7.6e-06	525103	WDPCP
rs12190575	intergenic_variant	6:57056006-57056006	A/G	0.8573	-0.011	0.0025	7.7e-06	691032	RAB23
rs1829259	intron_variant	2:63363511-63363511	T/C	0.5465	-0.0077	0.0017	7.7e-06	690720	WDPCP
rs1829259	intron_variant,NMD_transcript_variant	2:63363511-63363511	T/C	0.5465	-0.0077	0.0017	7.7e-06	690720	WDPCP
rs1829259	intron_variant,non_coding_transcript_variant	2:63363511-63363511	T/C	0.5465	-0.0077	0.0017	7.7e-06	690720	WDPCP
rs993315	intron_variant	9:84672806-84672806	T/C	0.4305	-0.0077	0.0017	7.7e-06	691746	NTRK2
rs1187349	intron_variant	9:84680656-84680656	A/G	0.4329	-0.0078	0.0017	8.1e-06	685235	NTRK2
rs7771115	intron_variant	6:57096723-57096723	A/G	0.8563	-0.0113	0.0025	8.1e-06	638161	RAB23
rs7771115	intron_variant,NMD_transcript_variant	6:57096723-57096723	A/G	0.8563	-0.0113	0.0025	8.1e-06	638161	RAB23
rs7771115	intron_variant,non_coding_transcript_variant	6:57096723-57096723	A/G	0.8563	-0.0113	0.0025	8.1e-06	638161	RAB23
rs4821997	intergenic_variant	22:41068537-41068537	T/C	0.2188	-0.0093	0.0021	8.2e-06	691599	EP300
rs2276138	intron_variant	11:66688916-66688916	T/C	0.4809	-0.0077	0.0017	8.4e-06	691789	BBS1
rs2276138	intron_variant,non_coding_transcript_variant	11:66688916-66688916	T/C	0.4809	-0.0077	0.0017	8.4e-06	691789	BBS1
rs2276138	non_coding_transcript_exon_variant	11:66688916-66688916	T/C	0.4809	-0.0077	0.0017	8.4e-06	691789	BBS1
rs4671472	intron_variant	2:63288777-63288777	A/C	0.6971	-0.009	0.002	8.4e-06	529059	WDPCP
rs4671472	intron_variant,NMD_transcript_variant	2:63288777-63288777	A/C	0.6971	-0.009	0.002	8.4e-06	529059	WDPCP
rs7484168	intergenic_variant	11:8295282-8295282	A/C	0.5499	-0.0078	0.0018	8.5e-06	684328	TUB
rs12625436	intron_variant	20:58870158-58870158	A/G	0.3944	0.008	0.0018	8.7e-06	680762	GNAS
rs12625436	intron_variant,non_coding_transcript_variant	20:58870158-58870158	A/G	0.3944	0.008	0.0018	8.7e-06	680762	GNAS
rs12625436	regulatory_region_variant	20:58870158-58870158	A/G	0.3944	0.008	0.0018	8.7e-06	680762	GNAS
rs1201363	intron_variant,non_coding_transcript_variant	9:84653844-84653844	T/C	0.5624	0.0077	0.0017	8.8e-06	689673	NTRK2
rs1837304	intron_variant,non_coding_transcript_variant	9:84635690-84635690	A/C	0.45	-0.0077	0.0017	8.8e-06	691982	NTRK2
rs12675038	intron_variant	8:116693979-116693979	T/C	0.8855	0.0113	0.0025	8.9e-06	794582	RAD21
rs12675038	intron_variant,NMD_transcript_variant	8:116693979-116693979	T/C	0.8855	0.0113	0.0025	8.9e-06	794582	RAD21
rs12675038	intron_variant,non_coding_transcript_variant	8:116693979-116693979	T/C	0.8855	0.0113	0.0025	8.9e-06	794582	RAD21
rs12675038	regulatory_region_variant	8:116693979-116693979	T/C	0.8855	0.0113	0.0025	8.9e-06	794582	RAD21
rs1543692	intron_variant,non_coding_transcript_variant	9:84654308-84654308	A/G	0.4348	-0.0077	0.0017	8.9e-06	689737	NTRK2
rs5995990	intergenic_variant	22:41066726-41066726	T/C	0.7821	0.0093	0.0021	8.9e-06	691925	EP300
rs1829261	intron_variant	2:63360022-63360022	A/G	0.306	0.0083	0.0019	9e-06	691218	WDPCP
rs1829261	intron_variant,NMD_transcript_variant	2:63360022-63360022	A/G	0.306	0.0083	0.0019	9e-06	691218	WDPCP
rs1829261	non_coding_transcript_exon_variant	2:63360022-63360022	A/G	0.306	0.0083	0.0019	9e-06	691218	WDPCP
rs1187329	intron_variant	9:84674365-84674365	A/G	0.4302	-0.0077	0.0017	9.1e-06	691969	NTRK2
rs3818717	synonymous_variant	17:17803791-17803791	T/C	0.4259	-0.0078	0.0018	9.4e-06	683243	RAI1
rs486584	synonymous_variant	11:66590655-66590655	T/C	0.5162	0.0076	0.0017	9.5e-06	692588	BBS1
rs8138294	intron_variant	22:36672683-36672683	T/C	0.6981	-0.0084	0.0019	9.5e-06	687484	IFT27
rs1857414	intron_variant,non_coding_transcript_variant	9:84647588-84647588	A/G	0.431	-0.0077	0.0017	9.7e-06	688960	NTRK2
rs580910	intron_variant	11:66634862-66634862	T/C	0.5175	0.0076	0.0017	9.7e-06	692213	BBS1
rs580910	intron_variant,NMD_transcript_variant	11:66634862-66634862	T/C	0.5175	0.0076	0.0017	9.7e-06	692213	BBS1
rs580910	intron_variant,non_coding_transcript_variant	11:66634862-66634862	T/C	0.5175	0.0076	0.0017	9.7e-06	692213	BBS1
rs498045	intron_variant	11:66595526-66595526	A/G	0.4835	-0.0076	0.0017	1e-05	692540	BBS1
rs498045	intron_variant,NMD_transcript_variant	11:66595526-66595526	A/G	0.4835	-0.0076	0.0017	1e-05	692540	BBS1
rs498045	intron_variant,non_coding_transcript_variant	11:66595526-66595526	A/G	0.4835	-0.0076	0.0017	1e-05	692540	BBS1
rs498045	regulatory_region_variant	11:66595526-66595526	A/G	0.4835	-0.0076	0.0017	1e-05	692540	BBS1
rs692892	intergenic_variant	11:66581032-66581032	T/C	0.5158	0.0076	0.0017	1e-05	691755	BBS1
rs12945601	intron_variant	17:17750097-17750097	T/C	0.4004	-0.0078	0.0018	1.1e-05	685392	RAI1
rs12945601	regulatory_region_variant	17:17750097-17750097	T/C	0.4004	-0.0078	0.0018	1.1e-05	685392	RAI1
rs503250	intron_variant	11:66604595-66604595	T/C	0.5171	0.0076	0.0017	1.1e-05	691549	BBS1
rs503250	intron_variant,NMD_transcript_variant	11:66604595-66604595	T/C	0.5171	0.0076	0.0017	1.1e-05	691549	BBS1
rs503250	intron_variant,non_coding_transcript_variant	11:66604595-66604595	T/C	0.5171	0.0076	0.0017	1.1e-05	691549	BBS1
rs556759	intron_variant	11:66604919-66604919	T/C	0.5169	0.0075	0.0017	1.1e-05	692162	BBS1
rs556759	intron_variant,NMD_transcript_variant	11:66604919-66604919	T/C	0.5169	0.0075	0.0017	1.1e-05	692162	BBS1
rs556759	intron_variant,non_coding_transcript_variant	11:66604919-66604919	T/C	0.5169	0.0075	0.0017	1.1e-05	692162	BBS1
rs2746967	intron_variant	22:36670443-36670443	A/C	0.6983	-0.0083	0.0019	1.2e-05	675904	IFT27
rs474602	intron_variant	11:66647347-66647347	A/T	0.518	0.0075	0.0017	1.2e-05	685764	BBS1
rs10840013	intergenic_variant	11:8305229-8305229	A/T	0.3904	0.0078	0.0018	1.3e-05	686257	TUB
rs12577111	intron_variant	11:66670603-66670603	A/G	0.4823	-0.0075	0.0017	1.3e-05	692334	BBS1
rs10840011	intergenic_variant	11:8305060-8305060	A/G	0.5956	-0.0076	0.0018	1.4e-05	686776	TUB
rs10840011	regulatory_region_variant	11:8305060-8305060	A/G	0.5956	-0.0076	0.0018	1.4e-05	686776	TUB
rs11140706	intron_variant,non_coding_transcript_variant	9:84633733-84633733	A/C	0.5508	0.0075	0.0017	1.4e-05	692552	NTRK2
rs1187367	intron_variant,non_coding_transcript_variant	9:84641115-84641115	T/C	0.4487	-0.0075	0.0017	1.4e-05	691491	NTRK2
rs6901192	intron_variant	6:56997512-56997512	C/G	0.7843	-0.009	0.0021	1.4e-05	691946	RAB23
rs1815739	stop_gained	11:66560624-66560624	T/C	0.4401	0.0077	0.0018	1.5e-05	643484	BBS1
rs1471962	intron_variant	3:45907695-45907695	C/G	0.1722	0.0102	0.0024	1.6e-05	664262	LZTFL1
rs1471962	intron_variant,NMD_transcript_variant	3:45907695-45907695	C/G	0.1722	0.0102	0.0024	1.6e-05	664262	LZTFL1
rs1471962	intron_variant,non_coding_transcript_variant	3:45907695-45907695	C/G	0.1722	0.0102	0.0024	1.6e-05	664262	LZTFL1
rs1471962	regulatory_region_variant	3:45907695-45907695	C/G	0.1722	0.0102	0.0024	1.6e-05	664262	LZTFL1
rs9370552	intron_variant	6:56996319-56996319	T/C	0.7845	-0.0089	0.0021	1.6e-05	692025	RAB23
rs10840012	intergenic_variant	11:8305111-8305111	A/G	0.4042	0.0075	0.0018	1.7e-05	686818	TUB
rs10840012	regulatory_region_variant	11:8305111-8305111	A/G	0.4042	0.0075	0.0018	1.7e-05	686818	TUB
rs17347542	intron_variant,non_coding_transcript_variant	9:84623328-84623328	T/C	0.2467	-0.0087	0.002	1.7e-05	688426	NTRK2
rs3800023	intron_variant	6:57100898-57100898	C/G	0.8563	-0.0106	0.0025	1.7e-05	692609	RAB23
rs3800023	intron_variant,NMD_transcript_variant	6:57100898-57100898	C/G	0.8563	-0.0106	0.0025	1.7e-05	692609	RAB23
rs3800023	intron_variant,non_coding_transcript_variant	6:57100898-57100898	C/G	0.8563	-0.0106	0.0025	1.7e-05	692609	RAB23
rs3800023	missense_variant	6:57100898-57100898	C/G	0.8563	-0.0106	0.0025	1.7e-05	692609	RAB23
rs9396250	intron_variant	6:57006499-57006499	A/G	0.7835	-0.0089	0.0021	1.7e-05	691146	RAB23
rs1562908	intron_variant	6:56992867-56992867	A/C	0.2173	0.0089	0.0021	1.8e-05	692162	RAB23
rs1187327	intron_variant	9:84673625-84673625	T/C	0.4305	-0.0074	0.0017	1.9e-05	692294	NTRK2
rs11950813	intergenic_variant	5:42742803-42742803	A/G	0.2772	0.0082	0.0019	1.9e-05	692150	GHR
rs12518414	intergenic_variant	5:42721976-42721976	A/G	0.2771	0.0082	0.0019	1.9e-05	692079	GHR
rs6116750	intergenic_variant	20:5323196-5323196	T/C	0.5744	0.0076	0.0018	1.9e-05	678450	PROKR2
rs985542	intron_variant,non_coding_transcript_variant	9:84636330-84636330	C/G	0.5537	0.0073	0.0017	2.1e-05	691880	NTRK2
rs985543	intron_variant,non_coding_transcript_variant	9:84636268-84636268	A/G	0.5538	0.0073	0.0017	2.1e-05	691867	NTRK2
rs7717863	intergenic_variant	5:42741655-42741655	A/G	0.7226	-0.0081	0.0019	2.2e-05	692148	GHR
rs3790111	3_prime_UTR_variant	16:56347171-56347171	A/G	0.8895	-0.012	0.0028	2.4e-05	683092	BBS2
rs3790111	intron_variant	16:56347171-56347171	A/G	0.8895	-0.012	0.0028	2.4e-05	683092	BBS2
rs3790111	intron_variant,NMD_transcript_variant	16:56347171-56347171	A/G	0.8895	-0.012	0.0028	2.4e-05	683092	BBS2
rs3790111	intron_variant,non_coding_transcript_variant	16:56347171-56347171	A/G	0.8895	-0.012	0.0028	2.4e-05	683092	BBS2
rs3790111	non_coding_transcript_exon_variant	16:56347171-56347171	A/G	0.8895	-0.012	0.0028	2.4e-05	683092	BBS2
rs6924882	intron_variant	6:56999833-56999833	A/G	0.2155	0.0087	0.0021	2.4e-05	691832	RAB23
rs6924882	regulatory_region_variant	6:56999833-56999833	A/G	0.2155	0.0087	0.0021	2.4e-05	691832	RAB23
rs7725961	intergenic_variant	5:42723863-42723863	A/G	0.7229	-0.0081	0.0019	2.4e-05	691602	GHR
rs1881837	intron_variant	15:92921957-92921957	A/G	0.8336	-0.0099	0.0023	2.5e-05	690734	CHD2
rs1881837	intron_variant,non_coding_transcript_variant	15:92921957-92921957	A/G	0.8336	-0.0099	0.0023	2.5e-05	690734	CHD2
rs1881837	regulatory_region_variant	15:92921957-92921957	A/G	0.8336	-0.0099	0.0023	2.5e-05	690734	CHD2
rs2263636	intron_variant	2:63268230-63268230	A/C	0.2765	0.0087	0.0021	2.5e-05	531425	WDPCP
rs2263636	intron_variant,NMD_transcript_variant	2:63268230-63268230	A/C	0.2765	0.0087	0.0021	2.5e-05	531425	WDPCP
rs2284004	intron_variant	22:36668919-36668919	C/G	0.2625	0.009	0.0021	2.5e-05	526015	IFT27
rs6904172	3_prime_UTR_variant	6:57008624-57008624	A/G	0.2157	0.0087	0.0021	2.5e-05	691300	RAB23
rs6904172	intron_variant	6:57008624-57008624	A/G	0.2157	0.0087	0.0021	2.5e-05	691300	RAB23
rs7174740	intron_variant	15:92988484-92988484	T/C	0.7467	-0.0084	0.002	2.7e-05	690217	CHD2
rs7174740	intron_variant,NMD_transcript_variant	15:92988484-92988484	T/C	0.7467	-0.0084	0.002	2.7e-05	690217	CHD2
rs7174740	intron_variant,non_coding_transcript_variant	15:92988484-92988484	T/C	0.7467	-0.0084	0.002	2.7e-05	690217	CHD2
rs13002109	intergenic_variant	2:63119567-63119567	A/C	0.5112	-0.0072	0.0017	2.8e-05	684186	WDPCP
rs1406713	intron_variant	15:92918033-92918033	C/G	0.1957	0.0092	0.0022	2.9e-05	688196	CHD2
rs1406713	intron_variant,non_coding_transcript_variant	15:92918033-92918033	C/G	0.1957	0.0092	0.0022	2.9e-05	688196	CHD2
rs8180482	intron_variant	5:42765884-42765884	A/C	0.2746	0.008	0.0019	2.9e-05	691994	GHR
rs3800018	intron_variant	6:57204808-57204808	T/C	0.8528	-0.0102	0.0024	3.1e-05	688749	RAB23
rs12054838	intergenic_variant	5:42750075-42750075	T/C	0.7228	-0.008	0.0019	3.2e-05	691797	GHR
rs12055266	intron_variant	5:42769545-42769545	T/C	0.7254	-0.008	0.0019	3.2e-05	691990	GHR
rs1659409	intron_variant	9:84703372-84703372	A/G	0.4867	-0.0071	0.0017	3.2e-05	690914	NTRK2
rs2053359	intron_variant	15:92997767-92997767	T/C	0.7444	-0.0083	0.002	3.2e-05	690543	CHD2
rs2053359	intron_variant,NMD_transcript_variant	15:92997767-92997767	T/C	0.7444	-0.0083	0.002	3.2e-05	690543	CHD2
rs2053359	intron_variant,non_coding_transcript_variant	15:92997767-92997767	T/C	0.7444	-0.0083	0.002	3.2e-05	690543	CHD2
rs7734918	intron_variant	5:42768078-42768078	A/T	0.7254	-0.008	0.0019	3.2e-05	691989	GHR
rs7734918	regulatory_region_variant	5:42768078-42768078	A/T	0.7254	-0.008	0.0019	3.2e-05	691989	GHR
rs11074121	non_coding_transcript_exon_variant	15:92978374-92978374	A/G	0.1705	0.0096	0.0023	3.4e-05	690102	CHD2
rs11074121	synonymous_variant	15:92978374-92978374	A/G	0.1705	0.0096	0.0023	3.4e-05	690102	CHD2
rs11074121	synonymous_variant,NMD_transcript_variant	15:92978374-92978374	A/G	0.1705	0.0096	0.0023	3.4e-05	690102	CHD2
rs12519443	intron_variant	5:42819819-42819819	T/C	0.7261	-0.008	0.0019	3.4e-05	691184	GHR
rs6497012	intron_variant	15:92975877-92975877	C/G	0.1705	0.0096	0.0023	3.6e-05	690100	CHD2
rs6497012	intron_variant,NMD_transcript_variant	15:92975877-92975877	C/G	0.1705	0.0096	0.0023	3.6e-05	690100	CHD2
rs6497012	intron_variant,non_coding_transcript_variant	15:92975877-92975877	C/G	0.1705	0.0096	0.0023	3.6e-05	690100	CHD2
rs12900461	intron_variant	15:93009426-93009426	T/C	0.8283	-0.0095	0.0023	3.8e-05	692407	CHD2
rs12900461	intron_variant,NMD_transcript_variant	15:93009426-93009426	T/C	0.8283	-0.0095	0.0023	3.8e-05	692407	CHD2
rs1364024	intergenic_variant	5:42724811-42724811	T/C	0.7224	-0.0081	0.002	3.8e-05	682760	GHR
rs2033847	intron_variant	15:93002601-93002601	T/G	0.8292	-0.0096	0.0023	3.8e-05	691394	CHD2
rs2033847	intron_variant,NMD_transcript_variant	15:93002601-93002601	T/G	0.8292	-0.0096	0.0023	3.8e-05	691394	CHD2
rs11074122	intron_variant	15:92978421-92978421	T/G	0.171	0.0096	0.0023	3.9e-05	690102	CHD2
rs11074122	intron_variant,NMD_transcript_variant	15:92978421-92978421	T/G	0.171	0.0096	0.0023	3.9e-05	690102	CHD2
rs11074122	intron_variant,non_coding_transcript_variant	15:92978421-92978421	T/G	0.171	0.0096	0.0023	3.9e-05	690102	CHD2
rs11952526	intron_variant	5:42815331-42815331	A/G	0.2716	0.0079	0.0019	3.9e-05	691218	GHR
rs12915582	intron_variant	15:93009100-93009100	T/C	0.8288	-0.0095	0.0023	3.9e-05	691945	CHD2
rs12915582	intron_variant,NMD_transcript_variant	15:93009100-93009100	T/C	0.8288	-0.0095	0.0023	3.9e-05	691945	CHD2
rs12915582	intron_variant,non_coding_transcript_variant	15:93009100-93009100	T/C	0.8288	-0.0095	0.0023	3.9e-05	691945	CHD2
rs1439047	intron_variant	9:84713003-84713003	A/G	0.4913	-0.0071	0.0017	3.9e-05	691096	NTRK2
rs2113086	intron_variant	5:42827044-42827044	T/C	0.726	-0.0079	0.0019	3.9e-05	691363	GHR
rs2272458	intron_variant	15:92984613-92984613	A/G	0.7442	-0.0082	0.002	3.9e-05	690231	CHD2
rs2272458	intron_variant,NMD_transcript_variant	15:92984613-92984613	A/G	0.7442	-0.0082	0.002	3.9e-05	690231	CHD2
rs2272458	intron_variant,non_coding_transcript_variant	15:92984613-92984613	A/G	0.7442	-0.0082	0.002	3.9e-05	690231	CHD2
rs1470071	intron_variant	15:92963562-92963562	T/C	0.1669	0.0096	0.0023	4e-05	689475	CHD2
rs1470071	intron_variant,NMD_transcript_variant	15:92963562-92963562	T/C	0.1669	0.0096	0.0023	4e-05	689475	CHD2
rs1470071	intron_variant,non_coding_transcript_variant	15:92963562-92963562	T/C	0.1669	0.0096	0.0023	4e-05	689475	CHD2
rs1778929	intron_variant	9:84707625-84707625	T/C	0.4868	-0.0071	0.0017	4e-05	691103	NTRK2
rs7173849	intron_variant	15:92998770-92998770	C/G	0.1708	0.0095	0.0023	4e-05	691304	CHD2
rs7173849	intron_variant,NMD_transcript_variant	15:92998770-92998770	C/G	0.1708	0.0095	0.0023	4e-05	691304	CHD2
rs7173849	intron_variant,non_coding_transcript_variant	15:92998770-92998770	C/G	0.1708	0.0095	0.0023	4e-05	691304	CHD2
rs2284000	intron_variant	22:36657291-36657291	C/G	0.7091	-0.0079	0.0019	4.1e-05	675728	IFT27
rs2579371	intron_variant	9:84719153-84719153	T/C	0.5087	0.0071	0.0017	4.1e-05	689520	NTRK2
rs3906418	intron_variant	5:42790889-42790889	T/C	0.724	-0.0079	0.0019	4.1e-05	691302	GHR
rs1025768	intron_variant	15:92973984-92973984	A/G	0.8289	-0.0095	0.0023	4.3e-05	690003	CHD2
rs1025768	intron_variant,NMD_transcript_variant	15:92973984-92973984	A/G	0.8289	-0.0095	0.0023	4.3e-05	690003	CHD2
rs1025768	intron_variant,non_coding_transcript_variant	15:92973984-92973984	A/G	0.8289	-0.0095	0.0023	4.3e-05	690003	CHD2
rs4480535	intergenic_variant	11:8302272-8302272	A/G	0.4294	0.0072	0.0017	4.3e-05	685432	TUB
rs4821987	intergenic_variant	22:41041265-41041265	T/C	0.2282	-0.0084	0.0021	4.3e-05	690289	EP300
rs16888392	intron_variant	6:57211754-57211754	A/G	0.1455	0.01	0.0024	4.4e-05	680749	RAB23
rs1371391	intron_variant	15:93008570-93008570	A/G	0.8288	-0.0094	0.0023	4.5e-05	691534	CHD2
rs1371391	intron_variant,NMD_transcript_variant	15:93008570-93008570	A/G	0.8288	-0.0094	0.0023	4.5e-05	691534	CHD2
rs1371391	intron_variant,non_coding_transcript_variant	15:93008570-93008570	A/G	0.8288	-0.0094	0.0023	4.5e-05	691534	CHD2
rs1883987	intron_variant	22:36657422-36657422	T/C	0.659	-0.0075	0.0018	4.5e-05	686575	IFT27
rs11074124	intron_variant	15:92993436-92993436	A/G	0.747	-0.0081	0.002	4.8e-05	690279	CHD2
rs11074124	intron_variant,NMD_transcript_variant	15:92993436-92993436	A/G	0.747	-0.0081	0.002	4.8e-05	690279	CHD2
rs11074124	intron_variant,non_coding_transcript_variant	15:92993436-92993436	A/G	0.747	-0.0081	0.002	4.8e-05	690279	CHD2
rs11856160	intron_variant	15:92909616-92909616	A/G	0.8406	-0.0097	0.0024	4.8e-05	686463	CHD2
rs11856160	intron_variant,non_coding_transcript_variant	15:92909616-92909616	A/G	0.8406	-0.0097	0.0024	4.8e-05	686463	CHD2
rs4821992	intergenic_variant	22:41047071-41047071	T/C	0.2288	-0.0084	0.0021	4.9e-05	690255	EP300
rs720885	intron_variant	6:57012662-57012662	A/G	0.2146	0.0085	0.0021	4.9e-05	692600	RAB23
rs1035516	intron_variant	5:42823697-42823697	A/G	0.7219	-0.0078	0.0019	5.1e-05	691381	GHR
rs4813744	intergenic_variant	20:5360363-5360363	T/C	0.4444	-0.007	0.0017	5.2e-05	685728	PROKR2
rs6865453	intron_variant	5:42810037-42810037	A/C	0.7256	-0.0078	0.0019	5.3e-05	691456	GHR
rs6865453	intron_variant,non_coding_transcript_variant	5:42810037-42810037	A/C	0.7256	-0.0078	0.0019	5.3e-05	691456	GHR
rs1778934	intron_variant	9:84709707-84709707	A/G	0.5081	0.0069	0.0017	5.5e-05	691011	NTRK2
rs1778934	regulatory_region_variant	9:84709707-84709707	A/G	0.5081	0.0069	0.0017	5.5e-05	691011	NTRK2
rs11656775	intron_variant	17:17751005-17751005	A/G	0.3268	-0.0071	0.0018	5.6e-05	788532	RAI1
rs11656775	regulatory_region_variant	17:17751005-17751005	A/G	0.3268	-0.0071	0.0018	5.6e-05	788532	RAI1
rs3811360	3_prime_UTR_variant	16:56346658-56346658	A/G	0.8879	-0.0116	0.0029	5.6e-05	629193	BBS2
rs3811360	intron_variant	16:56346658-56346658	A/G	0.8879	-0.0116	0.0029	5.6e-05	629193	BBS2
rs3811360	intron_variant,NMD_transcript_variant	16:56346658-56346658	A/G	0.8879	-0.0116	0.0029	5.6e-05	629193	BBS2
rs3811360	intron_variant,non_coding_transcript_variant	16:56346658-56346658	A/G	0.8879	-0.0116	0.0029	5.6e-05	629193	BBS2
rs3811360	non_coding_transcript_exon_variant	16:56346658-56346658	A/G	0.8879	-0.0116	0.0029	5.6e-05	629193	BBS2
rs11639256	intron_variant	15:92985243-92985243	T/C	0.2529	0.0081	0.002	5.7e-05	684246	CHD2
rs11639256	intron_variant,NMD_transcript_variant	15:92985243-92985243	T/C	0.2529	0.0081	0.002	5.7e-05	684246	CHD2
rs11639256	intron_variant,non_coding_transcript_variant	15:92985243-92985243	T/C	0.2529	0.0081	0.002	5.7e-05	684246	CHD2
rs11789677	intron_variant,non_coding_transcript_variant	9:84623695-84623695	A/G	0.7531	0.0077	0.0019	5.7e-05	791569	NTRK2
rs12701265	intron_variant,non_coding_transcript_variant	7:32931624-32931624	A/G	0.4004	0.0071	0.0018	5.7e-05	692513	BBS9
rs2161600	intron_variant	5:42824338-42824338	A/T	0.726	-0.0077	0.0019	5.7e-05	691389	GHR
rs6497014	intron_variant	15:93001466-93001466	T/C	0.2528	0.008	0.002	6e-05	690523	CHD2
rs6497014	intron_variant,NMD_transcript_variant	15:93001466-93001466	T/C	0.2528	0.008	0.002	6e-05	690523	CHD2
rs6497014	intron_variant,non_coding_transcript_variant	15:93001466-93001466	T/C	0.2528	0.008	0.002	6e-05	690523	CHD2
rs7717985	intergenic_variant	5:42741533-42741533	A/G	0.3005	0.0076	0.0019	6e-05	692053	GHR
rs6883543	intergenic_variant	5:42742411-42742411	A/G	0.3005	0.0076	0.0019	6.1e-05	692038	GHR
rs7180285	intron_variant	15:92956155-92956155	A/G	0.1659	0.0094	0.0023	6.1e-05	689075	CHD2
rs7180285	intron_variant,NMD_transcript_variant	15:92956155-92956155	A/G	0.1659	0.0094	0.0023	6.1e-05	689075	CHD2
rs7180285	intron_variant,non_coding_transcript_variant	15:92956155-92956155	A/G	0.1659	0.0094	0.0023	6.1e-05	689075	CHD2
rs131825	intron_variant	22:36650714-36650714	C/G	0.7243	-0.0079	0.002	6.4e-05	676496	IFT27
rs1971456	intergenic_variant	20:5324315-5324315	T/C	0.4282	-0.0071	0.0018	6.6e-05	674843	PROKR2
rs6076821	intergenic_variant	20:5362995-5362995	T/C	0.445	-0.0069	0.0017	6.8e-05	691563	PROKR2
rs4777755	non_coding_transcript_exon_variant	15:92967373-92967373	A/G	0.1698	0.0093	0.0023	7e-05	689339	CHD2
rs4777755	synonymous_variant	15:92967373-92967373	A/G	0.1698	0.0093	0.0023	7e-05	689339	CHD2
rs4777755	synonymous_variant,NMD_transcript_variant	15:92967373-92967373	A/G	0.1698	0.0093	0.0023	7e-05	689339	CHD2
rs4866949	intron_variant	5:42718320-42718320	T/C	0.6995	-0.0075	0.0019	7e-05	691956	GHR
rs4866949	intron_variant,NMD_transcript_variant	5:42718320-42718320	T/C	0.6995	-0.0075	0.0019	7e-05	691956	GHR
rs4866949	intron_variant,non_coding_transcript_variant	5:42718320-42718320	T/C	0.6995	-0.0075	0.0019	7e-05	691956	GHR
rs7708223	intergenic_variant	5:42723796-42723796	T/C	0.6996	-0.0075	0.0019	7.1e-05	691944	GHR
rs12900800	intron_variant	15:92969448-92969448	A/G	0.7508	-0.008	0.002	7.4e-05	688611	CHD2
rs12900800	intron_variant,NMD_transcript_variant	15:92969448-92969448	A/G	0.7508	-0.008	0.002	7.4e-05	688611	CHD2
rs12900800	intron_variant,non_coding_transcript_variant	15:92969448-92969448	A/G	0.7508	-0.008	0.002	7.4e-05	688611	CHD2
rs12521615	intron_variant	5:42832060-42832060	A/G	0.2849	0.0075	0.0019	7.5e-05	690386	GHR
rs328300	intergenic_variant	8:38486981-38486981	T/G	0.5157	0.0069	0.0017	7.5e-05	680608	FGFR1
rs10941593	intron_variant	5:42831605-42831605	T/G	0.7151	-0.0075	0.0019	7.8e-05	690406	GHR
rs12233949	intron_variant	5:42607359-42607359	C/G	0.2946	0.0072	0.0018	7.8e-05	783117	GHR
rs12233949	intron_variant,NMD_transcript_variant	5:42607359-42607359	C/G	0.2946	0.0072	0.0018	7.8e-05	783117	GHR
rs12233949	intron_variant,non_coding_transcript_variant	5:42607359-42607359	C/G	0.2946	0.0072	0.0018	7.8e-05	783117	GHR
rs7725776	intergenic_variant	5:42723654-42723654	T/C	0.3004	0.0074	0.0019	7.8e-05	691938	GHR
rs6516026	intergenic_variant	20:5363466-5363466	T/C	0.4456	-0.0069	0.0017	7.9e-05	691985	PROKR2
rs9637794	intron_variant	5:42833230-42833230	A/G	0.2849	0.0075	0.0019	8e-05	690373	GHR
rs12187996	intron_variant	5:42717508-42717508	T/C	0.3004	0.0074	0.0019	8.1e-05	691509	GHR
rs12187996	intron_variant,NMD_transcript_variant	5:42717508-42717508	T/C	0.3004	0.0074	0.0019	8.1e-05	691509	GHR
rs12187996	intron_variant,non_coding_transcript_variant	5:42717508-42717508	T/C	0.3004	0.0074	0.0019	8.1e-05	691509	GHR
rs12519532	intron_variant	5:42829201-42829201	A/G	0.2849	0.0075	0.0019	8.3e-05	691461	GHR
rs4140424	intergenic_variant	20:5361277-5361277	T/C	0.4454	-0.0068	0.0017	8.3e-05	692370	PROKR2
rs2579372	intron_variant,non_coding_transcript_variant	9:84644705-84644705	A/G	0.5636	0.0074	0.0019	8.6e-05	531038	NTRK2
rs9306311	intron_variant	22:36654628-36654628	C/G	0.7237	-0.0077	0.002	9.1e-05	680447	IFT27
rs4866797	intergenic_variant	5:42747246-42747246	T/G	0.6995	-0.0074	0.0019	9.3e-05	691745	GHR
rs11950811	intergenic_variant	5:42742795-42742795	T/G	0.3005	0.0082	0.0021	9.4e-05	656634	GHR
rs11957181	intergenic_variant	5:42746454-42746454	T/C	0.6995	-0.0074	0.0019	9.6e-05	691747	GHR
rs6076820	intergenic_variant	20:5362841-5362841	A/G	0.4456	-0.0068	0.0017	9.6e-05	692198	PROKR2
rs6076823	intergenic_variant	20:5363206-5363206	A/G	0.4456	-0.0068	0.0017	9.7e-05	692131	PROKR2
rs12187466	intergenic_variant	5:42751695-42751695	T/C	0.7016	-0.0073	0.0019	9.8e-05	691675	GHR
rs4866954	intergenic_variant	5:42747060-42747060	T/C	0.6995	-0.0074	0.0019	9.8e-05	691721	GHR
rs6076819	intergenic_variant	20:5362777-5362777	A/G	0.4456	-0.0068	0.0017	9.9e-05	692275	PROKR2
rs10941592	intron_variant	5:42831412-42831412	T/C	0.2849	0.0074	0.0019	0.0001	690404	GHR
rs11953691	intergenic_variant	5:42746324-42746324	T/C	0.3004	0.0073	0.0019	0.0001	691758	GHR
rs12055087	intron_variant	5:42769530-42769530	A/C	0.2976	0.0073	0.0019	0.0001	691859	GHR
rs4242120	intergenic_variant	5:42747435-42747435	A/G	0.6995	-0.0073	0.0019	0.0001	691742	GHR
rs4242121	intergenic_variant	5:42747560-42747560	A/G	0.6995	-0.0073	0.0019	0.0001	691741	GHR
rs10941586	intergenic_variant	5:42749021-42749021	A/G	0.6995	-0.0073	0.0019	0.00011	691716	GHR
rs3797311	intron_variant	5:42757077-42757077	A/G	0.7024	-0.0073	0.0019	0.00011	691667	GHR
rs3797311	regulatory_region_variant	5:42757077-42757077	A/G	0.7024	-0.0073	0.0019	0.00011	691667	GHR
rs4866796	intergenic_variant	5:42744793-42744793	A/G	0.3004	0.0073	0.0019	0.00011	691696	GHR
rs6899268	intron_variant	5:42771723-42771723	T/G	0.7024	-0.0073	0.0019	0.00011	691838	GHR
rs6978828	intergenic_variant	7:32954693-32954693	T/C	0.5987	-0.0068	0.0018	0.00011	689651	BBS9
rs722678	intergenic_variant	5:42748020-42748020	T/C	0.3005	0.0073	0.0019	0.00011	691736	GHR
rs8026638	intron_variant	15:92968618-92968618	T/C	0.1669	0.0094	0.0024	0.00011	676880	CHD2
rs8026638	intron_variant,NMD_transcript_variant	15:92968618-92968618	T/C	0.1669	0.0094	0.0024	0.00011	676880	CHD2
rs8026638	intron_variant,non_coding_transcript_variant	15:92968618-92968618	T/C	0.1669	0.0094	0.0024	0.00011	676880	CHD2
rs1037324	intron_variant,non_coding_transcript_variant	7:32941549-32941549	A/C	0.5995	-0.0068	0.0018	0.00012	690853	BBS9
rs1037324	regulatory_region_variant	7:32941549-32941549	A/C	0.5995	-0.0068	0.0018	0.00012	690853	BBS9
rs10941591	intron_variant	5:42830874-42830874	A/T	0.2983	0.0075	0.0019	0.00012	656515	GHR
rs1364026	intron_variant	5:42780195-42780195	A/C	0.7024	-0.0073	0.0019	0.00012	691731	GHR
rs2910871	intergenic_variant	5:42734520-42734520	A/C	0.3114	0.0072	0.0019	0.00012	691851	GHR
rs4866798	intron_variant	5:42798213-42798213	A/G	0.7024	-0.0072	0.0019	0.00012	691732	GHR
rs4866963	intron_variant	5:42794986-42794986	A/G	0.7024	-0.0073	0.0019	0.00012	691373	GHR
rs7268107	intergenic_variant	20:5359685-5359685	A/G	0.5536	0.0067	0.0017	0.00012	690265	PROKR2
rs7268107	regulatory_region_variant	20:5359685-5359685	A/G	0.5536	0.0067	0.0017	0.00012	690265	PROKR2
rs12677487	intron_variant	8:116698540-116698540	T/C	0.8863	0.0103	0.0027	0.00013	691867	RAD21
rs12677487	intron_variant,NMD_transcript_variant	8:116698540-116698540	T/C	0.8863	0.0103	0.0027	0.00013	691867	RAD21
rs12677487	intron_variant,non_coding_transcript_variant	8:116698540-116698540	T/C	0.8863	0.0103	0.0027	0.00013	691867	RAD21
rs1862628	intergenic_variant	5:42723026-42723026	T/C	0.6879	-0.0072	0.0019	0.00013	691937	GHR
rs4815801	intergenic_variant	20:5359020-5359020	T/G	0.4466	-0.0066	0.0017	0.00013	690664	PROKR2
rs7268162	intergenic_variant	20:5359756-5359756	A/G	0.5536	0.0066	0.0017	0.00013	690464	PROKR2
rs7268162	regulatory_region_variant	20:5359756-5359756	A/G	0.5536	0.0066	0.0017	0.00013	690464	PROKR2
rs7579	3_prime_UTR_variant	5:42800706-42800706	T/C	0.2977	0.0072	0.0019	0.00013	691663	GHR
rs7579	non_coding_transcript_exon_variant	5:42800706-42800706	T/C	0.2977	0.0072	0.0019	0.00013	691663	GHR
rs1028555	intergenic_variant	20:5356895-5356895	T/C	0.553	0.0066	0.0017	0.00014	690849	PROKR2
rs1046068	intron_variant	5:42805344-42805344	T/C	0.7024	-0.0072	0.0019	0.00014	691510	GHR
rs1046068	intron_variant,non_coding_transcript_variant	5:42805344-42805344	T/C	0.7024	-0.0072	0.0019	0.00014	691510	GHR
rs1046068	non_coding_transcript_exon_variant	5:42805344-42805344	T/C	0.7024	-0.0072	0.0019	0.00014	691510	GHR
rs2973028	intergenic_variant	5:42745979-42745979	A/G	0.3114	0.0071	0.0019	0.00014	691421	GHR
rs3870358	intron_variant	5:42792380-42792380	T/C	0.2976	0.0072	0.0019	0.00014	691159	GHR
rs3870359	intron_variant	5:42792595-42792595	A/G	0.2976	0.0072	0.0019	0.00014	691159	GHR
rs6085130	intergenic_variant	20:5359801-5359801	T/C	0.4458	-0.0066	0.0017	0.00014	690891	PROKR2
rs6085130	regulatory_region_variant	20:5359801-5359801	T/C	0.4458	-0.0066	0.0017	0.00014	690891	PROKR2
rs11958761	intron_variant	5:42847988-42847988	C/G	0.2443	0.0076	0.002	0.00015	691543	GHR
rs12517112	intron_variant	5:42806533-42806533	T/C	0.7009	-0.0072	0.0019	0.00015	691024	GHR
rs12517112	intron_variant,non_coding_transcript_variant	5:42806533-42806533	T/C	0.7009	-0.0072	0.0019	0.00015	691024	GHR
rs12517112	non_coding_transcript_exon_variant	5:42806533-42806533	T/C	0.7009	-0.0072	0.0019	0.00015	691024	GHR
rs1345825	intergenic_variant	5:42724416-42724416	A/C	0.6883	-0.0071	0.0019	0.00015	691903	GHR
rs2167460	intron_variant	6:57019653-57019653	T/C	0.2042	0.0082	0.0022	0.00016	681151	RAB23
rs4815800	intergenic_variant	20:5358856-5358856	T/G	0.5534	0.0065	0.0017	0.00016	690625	PROKR2
rs6085126	intergenic_variant	20:5359393-5359393	A/G	0.4465	-0.0066	0.0017	0.00016	690702	PROKR2
rs1778912	intron_variant	9:84692519-84692519	A/G	0.5337	0.0065	0.0017	0.00017	691059	NTRK2
rs4866959	intron_variant	5:42784786-42784786	T/G	0.2976	0.0077	0.002	0.00017	528945	GHR
rs4925109	intron_variant	17:17758488-17758488	A/G	0.3196	-0.0071	0.0019	0.00017	685849	RAI1
rs4925109	regulatory_region_variant	17:17758488-17758488	A/G	0.3196	-0.0071	0.0019	0.00017	685849	RAI1
rs1187350	intron_variant	9:84680322-84680322	A/G	0.5336	0.0064	0.0017	0.00019	688463	NTRK2
rs1371390	intron_variant	15:92953644-92953644	T/C	0.8001	-0.0082	0.0022	0.00019	687602	CHD2
rs1371390	intron_variant,NMD_transcript_variant	15:92953644-92953644	T/C	0.8001	-0.0082	0.0022	0.00019	687602	CHD2
rs1371390	intron_variant,non_coding_transcript_variant	15:92953644-92953644	T/C	0.8001	-0.0082	0.0022	0.00019	687602	CHD2
rs1371390	non_coding_transcript_exon_variant	15:92953644-92953644	T/C	0.8001	-0.0082	0.0022	0.00019	687602	CHD2
rs1423649	intron_variant	5:42854371-42854371	T/C	0.7541	-0.0075	0.002	0.00019	691386	GHR
rs3849695	intron_variant	5:42853784-42853784	A/G	0.2453	0.0075	0.002	0.00019	689966	GHR
rs1423651	intron_variant	5:42856213-42856213	T/C	0.7567	-0.0075	0.002	0.00021	687183	GHR
rs1423651	regulatory_region_variant	5:42856213-42856213	T/C	0.7567	-0.0075	0.002	0.00021	687183	GHR
rs1260333	intergenic_variant	2:27525757-27525757	A/G	0.4478	-0.0064	0.0017	0.00022	691566	IFT172
rs468022	intron_variant	5:36988150-36988150	A/G	0.1576	-0.009	0.0024	0.00022	691474	NIPBL
rs468022	intron_variant,non_coding_transcript_variant	5:36988150-36988150	A/G	0.1576	-0.009	0.0024	0.00022	691474	NIPBL
rs10867041	intron_variant	9:137657357-137657357	T/C	0.1446	-0.0096	0.0026	0.00024	561206	EHMT1
rs10867041	intron_variant,NMD_transcript_variant	9:137657357-137657357	T/C	0.1446	-0.0096	0.0026	0.00024	561206	EHMT1
rs10867041	intron_variant,non_coding_transcript_variant	9:137657357-137657357	T/C	0.1446	-0.0096	0.0026	0.00024	561206	EHMT1
rs12520759	intron_variant	5:42843669-42843669	A/G	0.7533	-0.0073	0.002	0.00024	689990	GHR
rs12520759	regulatory_region_variant	5:42843669-42843669	A/G	0.7533	-0.0073	0.002	0.00024	689990	GHR
rs2911711	intergenic_variant	2:27527679-27527679	A/T	0.5302	0.0064	0.0017	0.00024	683949	IFT172
rs941448	intron_variant	17:17751228-17751228	C/G	0.3265	-0.0069	0.0019	0.00024	685446	RAI1
rs941448	regulatory_region_variant	17:17751228-17751228	C/G	0.3265	-0.0069	0.0019	0.00024	685446	RAI1
rs7719242	intron_variant	5:42844019-42844019	A/T	0.245	0.0073	0.002	0.00025	690103	GHR
rs1025743	intron_variant	9:84700202-84700202	T/C	0.4753	-0.0063	0.0017	0.00028	686931	NTRK2
rs1025743	regulatory_region_variant	9:84700202-84700202	T/C	0.4753	-0.0063	0.0017	0.00028	686931	NTRK2
rs7703376	intron_variant	5:42844234-42844234	A/C	0.245	0.0073	0.002	0.00028	690107	GHR
rs9687651	intron_variant	5:42843203-42843203	A/G	0.755	-0.0073	0.002	0.00028	690118	GHR
rs9687651	regulatory_region_variant	5:42843203-42843203	A/G	0.755	-0.0073	0.002	0.00028	690118	GHR
rs6882786	intron_variant	5:42843001-42843001	A/G	0.2454	0.0072	0.002	0.0003	690005	GHR
rs6882786	regulatory_region_variant	5:42843001-42843001	A/G	0.2454	0.0072	0.002	0.0003	690005	GHR
rs11041861	intergenic_variant	11:8305739-8305739	T/C	0.3466	0.0065	0.0018	0.00034	686699	TUB
rs4778061	intron_variant	15:92958168-92958168	A/T	0.7378	-0.007	0.002	0.00035	681203	CHD2
rs4778061	intron_variant,NMD_transcript_variant	15:92958168-92958168	A/T	0.7378	-0.007	0.002	0.00035	681203	CHD2
rs4778061	intron_variant,non_coding_transcript_variant	15:92958168-92958168	A/T	0.7378	-0.007	0.002	0.00035	681203	CHD2
rs4778061	regulatory_region_variant	15:92958168-92958168	A/T	0.7378	-0.007	0.002	0.00035	681203	CHD2
rs12221546	intergenic_variant	11:8304893-8304893	T/C	0.6535	-0.0064	0.0018	0.00044	686489	TUB
rs12221546	regulatory_region_variant	11:8304893-8304893	T/C	0.6535	-0.0064	0.0018	0.00044	686489	TUB
rs294695	intron_variant	5:36986586-36986586	T/C	0.8358	0.0082	0.0023	0.00048	691740	NIPBL
rs294695	intron_variant,non_coding_transcript_variant	5:36986586-36986586	T/C	0.8358	0.0082	0.0023	0.00048	691740	NIPBL
rs16903459	intron_variant	5:37031314-37031314	A/G	0.8393	0.0083	0.0024	0.00049	690911	NIPBL
rs11953554	intron_variant	5:42846774-42846774	T/G	0.2443	0.0068	0.002	0.00071	692204	GHR
rs16903490	intergenic_variant	5:37067944-37067944	A/G	0.831	0.0078	0.0023	0.0008	690738	NIPBL
rs140526	intron_variant	22:36637217-36637217	T/G	0.2991	0.0063	0.0019	0.0012	669105	IFT27
rs6085092	intergenic_variant	20:5319360-5319360	T/C	0.5699	0.0057	0.0018	0.0012	681338	PROKR2
rs1010479	intergenic_variant	20:5319781-5319781	A/G	0.4339	-0.0056	0.0018	0.0013	681330	PROKR2
rs6123836	intron_variant	20:58873691-58873691	T/C	0.3563	0.0053	0.0018	0.0026	762299	GNAS
rs6123836	intron_variant,non_coding_transcript_variant	20:58873691-58873691	T/C	0.3563	0.0053	0.0018	0.0026	762299	GNAS
rs4810148	intron_variant	20:58872856-58872856	T/C	0.652	-0.0055	0.0018	0.0028	684279	GNAS
rs4810148	intron_variant,non_coding_transcript_variant	20:58872856-58872856	T/C	0.652	-0.0055	0.0018	0.0028	684279	GNAS
rs6038134	intergenic_variant	20:5330970-5330970	T/C	0.53	0.0049	0.0017	0.0049	681230	PROKR2
rs6116751	intergenic_variant	20:5344826-5344826	T/C	0.526	0.0048	0.0017	0.0054	684957	PROKR2
rs1671062	intron_variant	11:66514067-66514067	A/G	0.3998	0.0046	0.0018	0.011	636861	BBS1
rs1671062	intron_variant,NMD_transcript_variant	11:66514067-66514067	A/G	0.3998	0.0046	0.0018	0.011	636861	BBS1
rs1671062	intron_variant,non_coding_transcript_variant	11:66514067-66514067	A/G	0.3998	0.0046	0.0018	0.011	636861	BBS1
rs10852181	intergenic_variant	15:92869548-92869548	C/G	0.1444	0.0062	0.0025	0.014	682973	CHD2
rs10852181	regulatory_region_variant	15:92869548-92869548	C/G	0.1444	0.0062	0.0025	0.014	682973	CHD2
rs8432	3_prime_UTR_variant	11:66532044-66532044	A/G	0.3998	0.0044	0.0018	0.015	637810	BBS1
rs8432	3_prime_UTR_variant,NMD_transcript_variant	11:66532044-66532044	A/G	0.3998	0.0044	0.0018	0.015	637810	BBS1
rs8432	intron_variant	11:66532044-66532044	A/G	0.3998	0.0044	0.0018	0.015	637810	BBS1
rs8432	intron_variant,NMD_transcript_variant	11:66532044-66532044	A/G	0.3998	0.0044	0.0018	0.015	637810	BBS1
rs8432	non_coding_transcript_exon_variant	11:66532044-66532044	A/G	0.3998	0.0044	0.0018	0.015	637810	BBS1
rs1671063	non_coding_transcript_exon_variant	11:66504671-66504671	A/G	0.4014	0.0042	0.0018	0.018	691347	BBS1
rs1671063	synonymous_variant	11:66504671-66504671	A/G	0.4014	0.0042	0.0018	0.018	691347	BBS1
rs7925108	intron_variant	11:66466552-66466552	A/G	0.4032	0.0034	0.0017	0.049	692306	BBS1
rs7925108	non_coding_transcript_exon_variant	11:66466552-66466552	A/G	0.4032	0.0034	0.0017	0.049	692306	BBS1
rs7925108	regulatory_region_variant	11:66466552-66466552	A/G	0.4032	0.0034	0.0017	0.049	692306	BBS1
